# Supplementary material for: Characterisation of the opposing effects of G6PD deficiency on cerebral malaria and severe malarial anaemia
Source: eLife. 2017 Jan 9;6:e15085. doi: 10.7554/eLife.15085 (PMC5222559; doi:10.7554/eLife.15085)
Supplement: Figure 1—source data 1. — DOI: http://dx.doi.org/10.7554/eLife.15085.006 [file elife-15085-fig1-data1.xlsx]

## Sheet: 5_Figure_1-source_data_1-Unadju
Site	Country	SNP	Location (B37)	Gene	Phenotype	Model	Sample	Beta	Standard Error	P	OR (95% CI)	Covariates adjusted for: S=sex; E=ethnicity; H=HbS	Control Counts (AA/AD/DD) A=ancestral; D=derived	Case Counts (AA/AD/DD) where A=ancestral; D=derived
Bamako	Mali	rs763737	153278307	IRAK1	severe malaria	add	All	0.151855	0.089436	0.089524	1.16(0.98-1.39)	SEH	114/70/129	122/89/196
Banjul	Gambia	rs763737	153278307	IRAK1	severe malaria	add	All	0.0124676	0.032288	0.699396	1.01(0.95-1.08)	SEH	1375/786/979	1108/550/801
Blantyre	Malawi	rs763737	153278307	IRAK1	severe malaria	add	All	-0.00303917	0.041044	0.940973	1(0.92-1.08)	SH	598/523/1403	307/308/734
Buea	Cameroon	rs763737	153278307	IRAK1	severe malaria	add	All	0.196452	0.0691005	0.00446936	1.22(1.06-1.39)	SEH	240/68/239	187/126/274
Ho_Chi_Minh_City	VietNam	rs763737	153278307	IRAK1	severe malaria	add	All	0.00772413	0.0551661	0.888647	1.01(0.9-1.12)	SE	1784/356/325	589/66/132
Ibadan	Nigeria	rs763737	153278307	IRAK1	severe malaria	add	All	-0.0688159	0.24004	0.774354	0.93(0.58-1.49)	SEH	7/14/17	24/13/39
Kilifi	Kenya	rs763737	153278307	IRAK1	severe malaria	add	All	-0.0496179	0.0332487	0.135614	0.95(0.89-1.02)	SEH	920/861/1941	601/423/1153
Kumasi	Ghana	rs763737	153278307	IRAK1	severe malaria	add	All	-0.0617564	0.0431764	0.152623	0.94(0.86-1.02)	SEH	537/422/897	445/313/686
Madang	PapuaNewGuinea	rs763737	153278307	IRAK1	severe malaria	add	All	-0.0621513	0.329381	0.850335	0.94(0.49-1.79)	SE	232/8/2	370/9/4
Moshi	Tanzania	rs763737	153278307	IRAK1	severe malaria	add	All	0.0308576	0.0864806	0.72123	1.03(0.87-1.22)	SEH	99/106/249	92/87/245
Noguchi	Ghana	rs763737	153278307	IRAK1	severe malaria	add	All	0.0102961	0.0990344	0.917197	1.01(0.83-1.23)	SEH	51/42/89	202/132/315
Ougadougou	BurkinaFaso	rs763737	153278307	IRAK1	severe malaria	add	All	-0.0444136	0.0593182	0.454017	0.96(0.85-1.07)	SH	211/145/355	264/164/406
All	All	rs763737	153278307	IRAK1	severe malaria	add	All	-0.00346127	0.0154655	0.822908	1(0.97-1.03)	SEH	6168/3401/6625	4311/2280/4985
Bamako	Mali	rs763737	153278307	IRAK1	severe malaria	rec	All	0.211887	0.159478	0.18397	1.24(0.9-1.69)	SEH	114/70/129	122/89/196
Banjul	Gambia	rs763737	153278307	IRAK1	severe malaria	rec	All	0.0667606	0.0620703	0.282123	1.07(0.95-1.21)	SEH	1375/786/979	1108/550/801
Blantyre	Malawi	rs763737	153278307	IRAK1	severe malaria	rec	All	-0.0367376	0.0703974	0.601768	0.96(0.84-1.11)	SH	598/523/1403	307/308/734
Buea	Cameroon	rs763737	153278307	IRAK1	severe malaria	rec	All	0.335712	0.131045	0.0104127	1.4(1.08-1.81)	SEH	240/68/239	187/126/274
Ho_Chi_Minh_City	VietNam	rs763737	153278307	IRAK1	severe malaria	rec	All	0.00914368	0.115239	0.936758	1.01(0.81-1.26)	SE	1784/356/325	589/66/132
Ibadan	Nigeria	rs763737	153278307	IRAK1	severe malaria	rec	All	0.200723	0.41733	0.630539	1.22(0.54-2.77)	SEH	7/14/17	24/13/39
Kilifi	Kenya	rs763737	153278307	IRAK1	severe malaria	rec	All	-0.0192784	0.0575969	0.737842	0.98(0.88-1.1)	SEH	920/861/1941	601/423/1153
Kumasi	Ghana	rs763737	153278307	IRAK1	severe malaria	rec	All	-0.125295	0.0768853	0.10318	0.88(0.76-1.03)	SEH	537/422/897	445/313/686
Madang	PapuaNewGuinea	rs763737	153278307	IRAK1	severe malaria	rec	All	0.26038	0.877612	0.766702	1.3(0.23-7.25)	SE	232/8/2	370/9/4
Moshi	Tanzania	rs763737	153278307	IRAK1	severe malaria	rec	All	0.0194101	0.145515	0.893885	1.02(0.77-1.36)	SEH	99/106/249	92/87/245
Noguchi	Ghana	rs763737	153278307	IRAK1	severe malaria	rec	All	0.0575093	0.174204	0.741305	1.06(0.75-1.49)	SEH	51/42/89	202/132/315
Ougadougou	BurkinaFaso	rs763737	153278307	IRAK1	severe malaria	rec	All	-0.107743	0.106119	0.309961	0.9(0.73-1.11)	SH	211/145/355	264/164/406
All	All	rs763737	153278307	IRAK1	severe malaria	rec	All	-0.000278487	0.0280172	0.992069	1(0.95-1.06)	SEH	6168/3401/6625	4311/2280/4985
Bamako	Mali	rs763737	153278307	IRAK1	severe malaria	dom	All	0.322122	0.173971	0.064085	1.38(0.98-1.94)	SEH	114/70/129	122/89/196
Banjul	Gambia	rs763737	153278307	IRAK1	severe malaria	dom	All	-0.0175598	0.0578562	0.761503	0.98(0.88-1.1)	SEH	1375/786/979	1108/550/801
Blantyre	Malawi	rs763737	153278307	IRAK1	severe malaria	dom	All	0.0385036	0.0829934	0.642694	1.04(0.88-1.22)	SH	598/523/1403	307/308/734
Buea	Cameroon	rs763737	153278307	IRAK1	severe malaria	dom	All	0.374382	0.131394	0.00438152	1.45(1.12-1.88)	SEH	240/68/239	187/126/274
Ho_Chi_Minh_City	VietNam	rs763737	153278307	IRAK1	severe malaria	dom	All	0.0170738	0.0963929	0.859408	1.02(0.84-1.23)	SE	1784/356/325	589/66/132
Ibadan	Nigeria	rs763737	153278307	IRAK1	severe malaria	dom	All	-0.560616	0.499848	0.262044	0.57(0.21-1.52)	SEH	7/14/17	24/13/39
Kilifi	Kenya	rs763737	153278307	IRAK1	severe malaria	dom	All	-0.170187	0.0656132	0.00949225	0.84(0.74-0.96)	SEH	920/861/1941	601/423/1153
Kumasi	Ghana	rs763737	153278307	IRAK1	severe malaria	dom	All	-0.0839457	0.0840898	0.31814	0.92(0.78-1.08)	SEH	537/422/897	445/313/686
Madang	PapuaNewGuinea	rs763737	153278307	IRAK1	severe malaria	dom	All	-0.18235	0.452147	0.686729	0.83(0.34-2.02)	SE	232/8/2	370/9/4
Moshi	Tanzania	rs763737	153278307	IRAK1	severe malaria	dom	All	0.10027	0.176927	0.570899	1.11(0.78-1.56)	SEH	99/106/249	92/87/245
Noguchi	Ghana	rs763737	153278307	IRAK1	severe malaria	dom	All	-0.032658	0.198573	0.869366	0.97(0.66-1.43)	SEH	51/42/89	202/132/315
Ougadougou	BurkinaFaso	rs763737	153278307	IRAK1	severe malaria	dom	All	-0.040815	0.115714	0.724295	0.96(0.77-1.2)	SH	211/145/355	264/164/406
All	All	rs763737	153278307	IRAK1	severe malaria	dom	All	-0.0121443	0.0292692	0.678203	0.99(0.93-1.05)	SEH	6168/3401/6625	4311/2280/4985
Bamako	Mali	rs763737	153278307	IRAK1	severe malaria	add	F	0.0416874	0.165643	0.801296	1.04(0.75-1.44)	EH	28/70/53	32/89/62
Banjul	Gambia	rs763737	153278307	IRAK1	severe malaria	add	F	-0.0296515	0.0564757	0.599561	0.97(0.87-1.08)	EH	498/786/301	407/550/226
Blantyre	Malawi	rs763737	153278307	IRAK1	severe malaria	add	F	-0.0225516	0.0714929	0.752429	0.98(0.85-1.12)	H	162/523/516	81/308/272
Buea	Cameroon	rs763737	153278307	IRAK1	severe malaria	add	F	0.104003	0.146667	0.478256	1.11(0.83-1.48)	EH	40/68/42	62/126/82
Ho_Chi_Minh_City	VietNam	rs763737	153278307	IRAK1	severe malaria	add	F	-0.112731	0.139857	0.420214	0.89(0.68-1.18)	E	736/356/44	137/66/4
Ibadan	Nigeria	rs763737	153278307	IRAK1	severe malaria	add	F	0.12963	0.469018	0.782251	1.14(0.45-2.85)	EH	1/14/5	5/13/12
Kilifi	Kenya	rs763737	153278307	IRAK1	severe malaria	add	F	-0.0348921	0.0565395	0.53715	0.97(0.86-1.08)	EH	269/861/757	179/423/454
Kumasi	Ghana	rs763737	153278307	IRAK1	severe malaria	add	F	-0.0908238	0.0752071	0.227182	0.91(0.79-1.06)	EH	171/422/351	132/313/233
Madang	PapuaNewGuinea	rs763737	153278307	IRAK1	severe malaria	add	F	-0.102432	0.460944	0.82414	0.9(0.37-2.23)	E	105/8/0	161/9/1
Moshi	Tanzania	rs763737	153278307	IRAK1	severe malaria	add	F	-0.157123	0.151465	0.29957	0.85(0.64-1.15)	EH	25/106/118	24/87/87
Noguchi	Ghana	rs763737	153278307	IRAK1	severe malaria	add	F	0.129881	0.186722	0.486688	1.14(0.79-1.64)	EH	12/42/31	43/132/106
Ougadougou	BurkinaFaso	rs763737	153278307	IRAK1	severe malaria	add	F	-0.149716	0.105354	0.155294	0.86(0.7-1.06)	H	62/145/139	70/164/128
All	All	rs763737	153278307	IRAK1	severe malaria	add	F	-0.0450926	0.0276222	0.102579	0.96(0.91-1.01)	EH	2109/3401/2357	1333/2280/1667
Bamako	Mali	rs763737	153278307	IRAK1	severe malaria	rec	F	-0.0313391	0.242715	0.897263	0.97(0.6-1.56)	EH	28/70/53	32/89/62
Banjul	Gambia	rs763737	153278307	IRAK1	severe malaria	rec	F	0.0646328	0.101517	0.52434	1.07(0.87-1.3)	EH	498/786/301	407/550/226
Blantyre	Malawi	rs763737	153278307	IRAK1	severe malaria	rec	F	-0.0850732	0.099053	0.390415	0.92(0.76-1.12)	H	162/523/516	81/308/272
Buea	Cameroon	rs763737	153278307	IRAK1	severe malaria	rec	F	0.0774385	0.234582	0.741315	1.08(0.68-1.71)	EH	40/68/42	62/126/82
Ho_Chi_Minh_City	VietNam	rs763737	153278307	IRAK1	severe malaria	rec	F	-0.721312	0.529228	0.172898	0.49(0.17-1.37)	E	736/356/44	137/66/4
Ibadan	Nigeria	rs763737	153278307	IRAK1	severe malaria	rec	F	0.763692	0.650591	0.240457	2.15(0.6-7.68)	EH	1/14/5	5/13/12
Kilifi	Kenya	rs763737	153278307	IRAK1	severe malaria	rec	F	0.0734319	0.0807663	0.36325	1.08(0.92-1.26)	EH	269/861/757	179/423/454
Kumasi	Ghana	rs763737	153278307	IRAK1	severe malaria	rec	F	-0.162576	0.112664	0.149016	0.85(0.68-1.06)	EH	171/422/351	132/313/233
Madang	PapuaNewGuinea	rs763737	153278307	IRAK1	severe malaria	rec	F	14.2296	882.743	0.987139	1512985.7(0-Inf)	E	105/8/0	161/9/1
Moshi	Tanzania	rs763737	153278307	IRAK1	severe malaria	rec	F	-0.195749	0.202826	0.334491	0.82(0.55-1.22)	EH	25/106/118	24/87/87
Noguchi	Ghana	rs763737	153278307	IRAK1	severe malaria	rec	F	0.233796	0.269368	0.385427	1.26(0.75-2.14)	EH	12/42/31	43/132/106
Ougadougou	BurkinaFaso	rs763737	153278307	IRAK1	severe malaria	rec	F	-0.247503	0.157165	0.115303	0.78(0.57-1.06)	H	62/145/139	70/164/128
All	All	rs763737	153278307	IRAK1	severe malaria	rec	F	-0.0290434	0.0424099	0.493454	0.97(0.89-1.06)	EH	2109/3401/2357	1333/2280/1667
Bamako	Mali	rs763737	153278307	IRAK1	severe malaria	dom	F	0.192025	0.305433	0.529546	1.21(0.67-2.2)	EH	28/70/53	32/89/62
Banjul	Gambia	rs763737	153278307	IRAK1	severe malaria	dom	F	-0.111425	0.0845643	0.187627	0.89(0.76-1.06)	EH	498/786/301	407/550/226
Blantyre	Malawi	rs763737	153278307	IRAK1	severe malaria	dom	F	0.0918055	0.147185	0.532797	1.1(0.82-1.46)	H	162/523/516	81/308/272
Buea	Cameroon	rs763737	153278307	IRAK1	severe malaria	dom	F	0.211491	0.247082	0.392024	1.24(0.76-2.01)	EH	40/68/42	62/126/82
Ho_Chi_Minh_City	VietNam	rs763737	153278307	IRAK1	severe malaria	dom	F	-0.063736	0.159977	0.69033	0.94(0.69-1.28)	E	736/356/44	137/66/4
Ibadan	Nigeria	rs763737	153278307	IRAK1	severe malaria	dom	F	-1.3397	1.16272	0.249234	0.26(0.03-2.56)	EH	1/14/5	5/13/12
Kilifi	Kenya	rs763737	153278307	IRAK1	severe malaria	dom	F	-0.26994	0.109587	0.0137684	0.76(0.62-0.95)	EH	269/861/757	179/423/454
Kumasi	Ghana	rs763737	153278307	IRAK1	severe malaria	dom	F	-0.0614036	0.138989	0.658644	0.94(0.72-1.23)	EH	171/422/351	132/313/233
Madang	PapuaNewGuinea	rs763737	153278307	IRAK1	severe malaria	dom	F	-0.223863	0.497569	0.652773	0.8(0.3-2.12)	E	105/8/0	161/9/1
Moshi	Tanzania	rs763737	153278307	IRAK1	severe malaria	dom	F	-0.220372	0.324129	0.496575	0.8(0.43-1.51)	EH	25/106/118	24/87/87
Noguchi	Ghana	rs763737	153278307	IRAK1	severe malaria	dom	F	0.0555534	0.361115	0.877737	1.06(0.52-2.15)	EH	12/42/31	43/132/106
Ougadougou	BurkinaFaso	rs763737	153278307	IRAK1	severe malaria	dom	F	-0.135117	0.196531	0.491762	0.87(0.59-1.28)	H	62/145/139	70/164/128
All	All	rs763737	153278307	IRAK1	severe malaria	dom	F	-0.0987971	0.0479236	0.0392501	0.91(0.82-1)	EH	2109/3401/2357	1333/2280/1667
Bamako	Mali	rs763737	153278307	IRAK1	severe malaria	het	F	0.138257	0.231532	0.550413	1.15(0.73-1.81)	EH	28/70/53	32/89/62
Banjul	Gambia	rs763737	153278307	IRAK1	severe malaria	het	F	-0.137732	0.0794909	0.083154	0.87(0.75-1.02)	EH	498/786/301	407/550/226
Blantyre	Malawi	rs763737	153278307	IRAK1	severe malaria	het	F	0.125129	0.0981747	0.202466	1.13(0.93-1.37)	H	162/523/516	81/308/272
Buea	Cameroon	rs763737	153278307	IRAK1	severe malaria	het	F	0.0910481	0.212884	0.668878	1.1(0.72-1.66)	EH	40/68/42	62/126/82
Ho_Chi_Minh_City	VietNam	rs763737	153278307	IRAK1	severe malaria	het	F	0.0237531	0.162807	0.884003	1.02(0.74-1.41)	E	736/356/44	137/66/4
Ibadan	Nigeria	rs763737	153278307	IRAK1	severe malaria	het	F	-1.13038	0.614385	0.0657903	0.32(0.1-1.08)	EH	1/14/5	5/13/12
Kilifi	Kenya	rs763737	153278307	IRAK1	severe malaria	het	F	-0.216869	0.0808207	0.00728926	0.81(0.69-0.94)	EH	269/861/757	179/423/454
Kumasi	Ghana	rs763737	153278307	IRAK1	severe malaria	het	F	0.113523	0.10807	0.293507	1.12(0.91-1.38)	EH	171/422/351	132/313/233
Madang	PapuaNewGuinea	rs763737	153278307	IRAK1	severe malaria	het	F	-0.344885	0.509943	0.498838	0.71(0.26-1.92)	E	105/8/0	161/9/1
Moshi	Tanzania	rs763737	153278307	IRAK1	severe malaria	het	F	0.110677	0.203844	0.587165	1.12(0.75-1.67)	EH	25/106/118	24/87/87
Noguchi	Ghana	rs763737	153278307	IRAK1	severe malaria	het	F	-0.18782	0.256143	0.463398	0.83(0.5-1.37)	EH	12/42/31	43/132/106
Ougadougou	BurkinaFaso	rs763737	153278307	IRAK1	severe malaria	het	F	0.153886	0.153568	0.316309	1.17(0.86-1.58)	H	62/145/139	70/164/128
All	All	rs763737	153278307	IRAK1	severe malaria	het	F	-0.0399918	0.0386473	0.300767	0.96(0.89-1.04)	EH	2109/3401/2357	1333/2280/1667
Bamako	Mali	rs763737	153278307	IRAK1	severe malaria	dom	M	0.427206	0.21524	0.0471683	1.53(1.01-2.34)	EH	86/0/76	90/0/134
Banjul	Gambia	rs763737	153278307	IRAK1	severe malaria	dom	M	0.0630522	0.0792357	0.426174	1.07(0.91-1.24)	EH	877/0/678	701/0/575
Blantyre	Malawi	rs763737	153278307	IRAK1	severe malaria	dom	M	0.0133022	0.100845	0.895058	1.01(0.83-1.23)	H	436/0/887	226/0/462
Buea	Cameroon	rs763737	153278307	IRAK1	severe malaria	dom	M	0.447995	0.15711	0.00435169	1.57(1.15-2.13)	EH	200/0/197	125/0/192
Ho_Chi_Minh_City	VietNam	rs763737	153278307	IRAK1	severe malaria	dom	M	0.0680267	0.121044	0.574117	1.07(0.84-1.36)	E	1048/0/281	452/0/128
Ibadan	Nigeria	rs763737	153278307	IRAK1	severe malaria	dom	M	-0.155665	0.614783	0.800112	0.86(0.26-2.86)	EH	6/0/12	19/0/27
Kilifi	Kenya	rs763737	153278307	IRAK1	severe malaria	dom	M	-0.113634	0.0813733	0.162576	0.89(0.76-1.05)	EH	651/0/1184	422/0/699
Kumasi	Ghana	rs763737	153278307	IRAK1	severe malaria	dom	M	-0.0991922	0.105776	0.348367	0.91(0.74-1.11)	EH	366/0/546	313/0/453
Madang	PapuaNewGuinea	rs763737	153278307	IRAK1	severe malaria	dom	M	-0.0502618	0.922051	0.956528	0.95(0.16-5.79)	E	127/0/2	209/0/3
Moshi	Tanzania	rs763737	153278307	IRAK1	severe malaria	dom	M	0.291796	0.214144	0.173003	1.34(0.88-2.04)	EH	74/0/131	68/0/158
Noguchi	Ghana	rs763737	153278307	IRAK1	severe malaria	dom	M	-0.0667794	0.236198	0.777386	0.94(0.59-1.49)	EH	39/0/58	159/0/209
Ougadougou	BurkinaFaso	rs763737	153278307	IRAK1	severe malaria	dom	M	0.0108655	0.143839	0.939786	1.01(0.76-1.34)	H	149/0/216	194/0/278
All	All	rs763737	153278307	IRAK1	severe malaria	dom	M	0.0323069	0.0372337	0.38557	1.03(0.96-1.11)	EH	4059/0/4268	2978/0/3318
Bamako	Mali	rs763737	153278307	IRAK1	cerebral malaria	add	All	-0.00323709	0.156761	0.983525	1(0.73-1.36)	SEH	114/70/129	27/13/35
Banjul	Gambia	rs763737	153278307	IRAK1	cerebral malaria	add	All	0.0362102	0.0474437	0.445329	1.04(0.94-1.14)	SEH	1375/786/979	362/177/268
Blantyre	Malawi	rs763737	153278307	IRAK1	cerebral malaria	add	All	-0.0496797	0.0477368	0.298015	0.95(0.87-1.04)	SH	598/523/1403	207/194/448
Buea	Cameroon	rs763737	153278307	IRAK1	cerebral malaria	add	All	0.105224	0.186958	0.573555	1.11(0.77-1.6)	SEH	240/68/239	2013-12-10
Ho_Chi_Minh_City	VietNam	rs763737	153278307	IRAK1	cerebral malaria	add	All	-0.0668603	0.0991064	0.49991	0.94(0.77-1.14)	SE	1784/356/325	161/13/32
Ibadan	Nigeria	rs763737	153278307	IRAK1	cerebral malaria	add	All	-0.711106	0.621633	0.252651	0.49(0.15-1.66)	SEH	7/14/17	2002-01-03
Kilifi	Kenya	rs763737	153278307	IRAK1	cerebral malaria	add	All	-0.0861522	0.0456493	0.0591251	0.92(0.84-1)	SEH	920/861/1941	250/186/453
Kumasi	Ghana	rs763737	153278307	IRAK1	cerebral malaria	add	All	-0.210647	0.0858876	0.0141831	0.81(0.68-0.96)	SEH	537/422/897	79/56/87
Madang	PapuaNewGuinea	rs763737	153278307	IRAK1	cerebral malaria	add	All	0.236367	0.613396	0.699984	1.27(0.38-4.21)	SE	232/8/2	42/1/1
Moshi	Tanzania	rs763737	153278307	IRAK1	cerebral malaria	add	All	0.200382	0.223019	0.368919	1.22(0.79-1.89)	SEH	99/106/249	2020-09-05
Noguchi	Ghana	rs763737	153278307	IRAK1	cerebral malaria	add	All	-0.39111	0.279683	0.161991	0.68(0.39-1.17)	SEH	51/42/89	2008-03-10
Ougadougou	BurkinaFaso	rs763737	153278307	IRAK1	cerebral malaria	add	All	-0.0492115	0.120404	0.682744	0.95(0.75-1.21)	SH	211/145/355	35/18/53
All	All	rs763737	153278307	IRAK1	cerebral malaria	add	All	-0.0487035	0.0238756	0.0413613	0.95(0.91-1)	SEH	6168/3401/6625	1191/683/1420
Bamako	Mali	rs763737	153278307	IRAK1	cerebral malaria	rec	All	0.0381435	0.281878	0.892359	1.04(0.6-1.81)	SEH	114/70/129	27/13/35
Banjul	Gambia	rs763737	153278307	IRAK1	cerebral malaria	rec	All	0.140799	0.0903622	0.119195	1.15(0.96-1.37)	SEH	1375/786/979	362/177/268
Blantyre	Malawi	rs763737	153278307	IRAK1	cerebral malaria	rec	All	-0.0972387	0.0823157	0.237488	0.91(0.77-1.07)	SH	598/523/1403	207/194/448
Buea	Cameroon	rs763737	153278307	IRAK1	cerebral malaria	rec	All	-0.104347	0.356581	0.769802	0.9(0.45-1.81)	SEH	240/68/239	2013-12-10
Ho_Chi_Minh_City	VietNam	rs763737	153278307	IRAK1	cerebral malaria	rec	All	-0.128011	0.203209	0.528727	0.88(0.59-1.31)	SE	1784/356/325	161/13/32
Ibadan	Nigeria	rs763737	153278307	IRAK1	cerebral malaria	rec	All	-0.981635	0.980163	0.316584	0.37(0.05-2.56)	SEH	7/14/17	2002-01-03
Kilifi	Kenya	rs763737	153278307	IRAK1	cerebral malaria	rec	All	-0.0982409	0.0791937	0.214785	0.91(0.78-1.06)	SEH	920/861/1941	250/186/453
Kumasi	Ghana	rs763737	153278307	IRAK1	cerebral malaria	rec	All	-0.430425	0.159349	0.00691019	0.65(0.48-0.89)	SEH	537/422/897	79/56/87
Madang	PapuaNewGuinea	rs763737	153278307	IRAK1	cerebral malaria	rec	All	1.02469	1.24993	0.412328	2.79(0.24-32.28)	SE	232/8/2	42/1/1
Moshi	Tanzania	rs763737	153278307	IRAK1	cerebral malaria	rec	All	0.161588	0.376288	0.667613	1.18(0.56-2.46)	SEH	99/106/249	2020-09-05
Noguchi	Ghana	rs763737	153278307	IRAK1	cerebral malaria	rec	All	-0.325983	0.527189	0.53635	0.72(0.26-2.03)	SEH	51/42/89	2008-03-10
Ougadougou	BurkinaFaso	rs763737	153278307	IRAK1	cerebral malaria	rec	All	-0.0407284	0.21069	0.846717	0.96(0.64-1.45)	SH	211/145/355	35/18/53
All	All	rs763737	153278307	IRAK1	cerebral malaria	rec	All	-0.0712845	0.04321	0.0989999	0.93(0.86-1.01)	SEH	6168/3401/6625	1191/683/1420
Bamako	Mali	rs763737	153278307	IRAK1	cerebral malaria	dom	All	-0.0585245	0.301383	0.84603	0.94(0.52-1.7)	SEH	114/70/129	27/13/35
Banjul	Gambia	rs763737	153278307	IRAK1	cerebral malaria	dom	All	-0.00638562	0.0842208	0.939562	0.99(0.84-1.17)	SEH	1375/786/979	362/177/268
Blantyre	Malawi	rs763737	153278307	IRAK1	cerebral malaria	dom	All	-0.0673957	0.0959567	0.482458	0.93(0.77-1.13)	SH	598/523/1403	207/194/448
Buea	Cameroon	rs763737	153278307	IRAK1	cerebral malaria	dom	All	0.499615	0.390655	0.200927	1.65(0.77-3.54)	SEH	240/68/239	2013-12-10
Ho_Chi_Minh_City	VietNam	rs763737	153278307	IRAK1	cerebral malaria	dom	All	-0.119304	0.178549	0.504017	0.89(0.63-1.26)	SE	1784/356/325	161/13/32
Ibadan	Nigeria	rs763737	153278307	IRAK1	cerebral malaria	dom	All	-1.62032	1.24328	0.192485	0.2(0.02-2.26)	SEH	7/14/17	2002-01-03
Kilifi	Kenya	rs763737	153278307	IRAK1	cerebral malaria	dom	All	-0.209217	0.0892005	0.0190033	0.81(0.68-0.97)	SEH	920/861/1941	250/186/453
Kumasi	Ghana	rs763737	153278307	IRAK1	cerebral malaria	dom	All	-0.294813	0.165621	0.0750682	0.74(0.54-1.03)	SEH	537/422/897	79/56/87
Madang	PapuaNewGuinea	rs763737	153278307	IRAK1	cerebral malaria	dom	All	0.0979606	0.902039	0.91352	1.1(0.19-6.46)	SE	232/8/2	42/1/1
Moshi	Tanzania	rs763737	153278307	IRAK1	cerebral malaria	dom	All	0.650564	0.497046	0.190582	1.92(0.72-5.08)	SEH	99/106/249	2020-09-05
Noguchi	Ghana	rs763737	153278307	IRAK1	cerebral malaria	dom	All	-1.02162	0.463879	0.0276417	0.36(0.15-0.89)	SEH	51/42/89	2008-03-10
Ougadougou	BurkinaFaso	rs763737	153278307	IRAK1	cerebral malaria	dom	All	-0.139724	0.238162	0.557421	0.87(0.55-1.39)	SH	211/145/355	35/18/53
All	All	rs763737	153278307	IRAK1	cerebral malaria	dom	All	-0.0968716	0.0450287	0.0314502	0.91(0.83-0.99)	SEH	6168/3401/6625	1191/683/1420
Bamako	Mali	rs763737	153278307	IRAK1	cerebral malaria	add	F	0.0741689	0.294261	0.801001	1.08(0.6-1.92)	EH	28/70/53	6/13/12
Banjul	Gambia	rs763737	153278307	IRAK1	cerebral malaria	add	F	0.0306505	0.0814449	0.706669	1.03(0.88-1.21)	EH	498/786/301	136/177/85
Blantyre	Malawi	rs763737	153278307	IRAK1	cerebral malaria	add	F	-0.0932408	0.0819126	0.254997	0.91(0.78-1.07)	H	162/523/516	61/194/169
Buea	Cameroon	rs763737	153278307	IRAK1	cerebral malaria	add	F	-0.0171371	0.373171	0.963372	0.98(0.47-2.04)	EH	40/68/42	2002-12-02
Ho_Chi_Minh_City	VietNam	rs763737	153278307	IRAK1	cerebral malaria	add	F	-0.334561	0.305756	0.273863	0.72(0.39-1.3)	E	736/356/44	31/13/0
Ibadan	Nigeria	rs763737	153278307	IRAK1	cerebral malaria	add	F	-21.5381	8208.3	0.997906	0(0-Inf)	EH	1/14/5	2000-01-01
Kilifi	Kenya	rs763737	153278307	IRAK1	cerebral malaria	add	F	-0.117764	0.0778995	0.130598	0.89(0.76-1.04)	EH	269/861/757	78/186/174
Kumasi	Ghana	rs763737	153278307	IRAK1	cerebral malaria	add	F	-0.275312	0.152742	0.071472	0.76(0.56-1.02)	EH	171/422/351	26/56/28
Madang	PapuaNewGuinea	rs763737	153278307	IRAK1	cerebral malaria	add	F	-0.461609	1.14731	0.687434	0.63(0.07-5.97)	E	105/8/0	2000-01-18
Moshi	Tanzania	rs763737	153278307	IRAK1	cerebral malaria	add	F	0.221018	0.410068	0.589902	1.25(0.56-2.79)	EH	25/106/118	0/9/8
Noguchi	Ghana	rs763737	153278307	IRAK1	cerebral malaria	add	F	0.405352	0.496536	0.414294	1.5(0.57-3.97)	EH	12/42/31	2006-03-02
Ougadougou	BurkinaFaso	rs763737	153278307	IRAK1	cerebral malaria	add	F	-0.29504	0.207466	0.154993	0.74(0.5-1.12)	H	62/145/139	13/18/17
All	All	rs763737	153278307	IRAK1	cerebral malaria	add	F	-0.0851166	0.0418258	0.0418484	0.92(0.85-1)	EH	2109/3401/2357	374/683/501
Bamako	Mali	rs763737	153278307	IRAK1	cerebral malaria	rec	F	0.198737	0.430191	0.6441	1.22(0.52-2.83)	EH	28/70/53	6/13/12
Banjul	Gambia	rs763737	153278307	IRAK1	cerebral malaria	rec	F	0.230776	0.141619	0.103195	1.26(0.95-1.66)	EH	498/786/301	136/177/85
Blantyre	Malawi	rs763737	153278307	IRAK1	cerebral malaria	rec	F	-0.138509	0.115748	0.231445	0.87(0.69-1.09)	H	162/523/516	61/194/169
Buea	Cameroon	rs763737	153278307	IRAK1	cerebral malaria	rec	F	-0.978659	0.78156	0.210501	0.38(0.08-1.74)	EH	40/68/42	2002-12-02
Ho_Chi_Minh_City	VietNam	rs763737	153278307	IRAK1	cerebral malaria	rec	F	-15.3276	975.572	0.987465	0(0-Inf)	E	736/356/44	31/13/0
Ibadan	Nigeria	rs763737	153278307	IRAK1	cerebral malaria	rec	F	-17.4701	4618.24	0.996982	0(0-Inf)	EH	1/14/5	2000-01-01
Kilifi	Kenya	rs763737	153278307	IRAK1	cerebral malaria	rec	F	-0.0555922	0.111421	0.617824	0.95(0.76-1.18)	EH	269/861/757	78/186/174
Kumasi	Ghana	rs763737	153278307	IRAK1	cerebral malaria	rec	F	-0.524589	0.249126	0.035229	0.59(0.36-0.96)	EH	171/422/351	26/56/28
Madang	PapuaNewGuinea	rs763737	153278307	IRAK1	cerebral malaria	rec	F	NA	NA	NA	NA(NA-NA)	E	105/8/0	2000-01-18
Moshi	Tanzania	rs763737	153278307	IRAK1	cerebral malaria	rec	F	-0.0492619	0.51402	0.92365	0.95(0.35-2.61)	EH	25/106/118	0/9/8
Noguchi	Ghana	rs763737	153278307	IRAK1	cerebral malaria	rec	F	0.889356	0.659761	0.177659	2.43(0.67-8.87)	EH	12/42/31	2006-03-02
Ougadougou	BurkinaFaso	rs763737	153278307	IRAK1	cerebral malaria	rec	F	-0.258822	0.32286	0.422752	0.77(0.41-1.45)	H	62/145/139	13/18/17
All	All	rs763737	153278307	IRAK1	cerebral malaria	rec	F	-0.0676675	0.0638784	0.289456	0.93(0.82-1.06)	EH	2109/3401/2357	374/683/501
Bamako	Mali	rs763737	153278307	IRAK1	cerebral malaria	dom	F	-0.0582676	0.534383	0.913173	0.94(0.33-2.69)	EH	28/70/53	6/13/12
Banjul	Gambia	rs763737	153278307	IRAK1	cerebral malaria	dom	F	-0.0960868	0.121018	0.427201	0.91(0.72-1.15)	EH	498/786/301	136/177/85
Blantyre	Malawi	rs763737	153278307	IRAK1	cerebral malaria	dom	F	-0.0928141	0.163481	0.570214	0.91(0.66-1.26)	H	162/523/516	61/194/169
Buea	Cameroon	rs763737	153278307	IRAK1	cerebral malaria	dom	F	0.942929	0.785578	0.230023	2.57(0.55-11.97)	EH	40/68/42	2002-12-02
Ho_Chi_Minh_City	VietNam	rs763737	153278307	IRAK1	cerebral malaria	dom	F	-0.255893	0.336395	0.446841	0.77(0.4-1.5)	E	736/356/44	31/13/0
Ibadan	Nigeria	rs763737	153278307	IRAK1	cerebral malaria	dom	F	-21.6763	7722.06	0.99776	0(0-Inf)	EH	1/14/5	2000-01-01
Kilifi	Kenya	rs763737	153278307	IRAK1	cerebral malaria	dom	F	-0.332898	0.146028	0.0226259	0.72(0.54-0.95)	EH	269/861/757	78/186/174
Kumasi	Ghana	rs763737	153278307	IRAK1	cerebral malaria	dom	F	-0.193748	0.274153	0.479742	0.82(0.48-1.41)	EH	171/422/351	26/56/28
Madang	PapuaNewGuinea	rs763737	153278307	IRAK1	cerebral malaria	dom	F	-0.461609	1.14731	0.687434	0.63(0.07-5.97)	E	105/8/0	2000-01-18
Moshi	Tanzania	rs763737	153278307	IRAK1	cerebral malaria	dom	F	16.8698	1993.48	0.993248	21205163.56(0-Inf)	EH	25/106/118	0/9/8
Noguchi	Ghana	rs763737	153278307	IRAK1	cerebral malaria	dom	F	-0.22546	0.8499	0.790795	0.8(0.15-4.22)	EH	12/42/31	2006-03-02
Ougadougou	BurkinaFaso	rs763737	153278307	IRAK1	cerebral malaria	dom	F	-0.599991	0.358062	0.0938046	0.55(0.27-1.11)	H	62/145/139	13/18/17
All	All	rs763737	153278307	IRAK1	cerebral malaria	dom	F	-0.17043	0.0723399	0.018475	0.84(0.73-0.97)	EH	2109/3401/2357	374/683/501
Bamako	Mali	rs763737	153278307	IRAK1	cerebral malaria	het	F	-0.2203	0.419829	0.599766	0.8(0.35-1.83)	EH	28/70/53	6/13/12
Banjul	Gambia	rs763737	153278307	IRAK1	cerebral malaria	het	F	-0.230892	0.114789	0.0442778	0.79(0.63-0.99)	EH	498/786/301	136/177/85
Blantyre	Malawi	rs763737	153278307	IRAK1	cerebral malaria	het	F	0.091312	0.11426	0.4242	1.1(0.88-1.37)	H	162/523/516	61/194/169
Buea	Cameroon	rs763737	153278307	IRAK1	cerebral malaria	het	F	1.26366	0.60341	0.0362418	3.54(1.08-11.55)	EH	40/68/42	2002-12-02
Ho_Chi_Minh_City	VietNam	rs763737	153278307	IRAK1	cerebral malaria	het	F	-0.0831847	0.336736	0.804883	0.92(0.48-1.78)	E	736/356/44	31/13/0
Ibadan	Nigeria	rs763737	153278307	IRAK1	cerebral malaria	het	F	-1.09861	1.52753	0.472011	0.33(0.02-6.65)	EH	1/14/5	2000-01-01
Kilifi	Kenya	rs763737	153278307	IRAK1	cerebral malaria	het	F	-0.124121	0.110065	0.259443	0.88(0.71-1.1)	EH	269/861/757	78/186/174
Kumasi	Ghana	rs763737	153278307	IRAK1	cerebral malaria	het	F	0.333295	0.221943	0.133171	1.4(0.9-2.16)	EH	171/422/351	26/56/28
Madang	PapuaNewGuinea	rs763737	153278307	IRAK1	cerebral malaria	het	F	-0.461609	1.14731	0.687434	0.63(0.07-5.97)	E	105/8/0	2000-01-18
Moshi	Tanzania	rs763737	153278307	IRAK1	cerebral malaria	het	F	0.469924	0.519542	0.365731	1.6(0.58-4.43)	EH	25/106/118	0/9/8
Noguchi	Ghana	rs763737	153278307	IRAK1	cerebral malaria	het	F	-1.05052	0.717978	0.143421	0.35(0.09-1.43)	EH	12/42/31	2006-03-02
Ougadougou	BurkinaFaso	rs763737	153278307	IRAK1	cerebral malaria	het	F	-0.168874	0.319446	0.597051	0.84(0.45-1.58)	H	62/145/139	13/18/17
All	All	rs763737	153278307	IRAK1	cerebral malaria	het	F	-0.0520839	0.0585838	0.373976	0.95(0.85-1.06)	EH	2109/3401/2357	374/683/501
Bamako	Mali	rs763737	153278307	IRAK1	cerebral malaria	dom	M	-0.0277829	0.368326	0.939873	0.97(0.47-2)	EH	86/0/76	21/0/23
Banjul	Gambia	rs763737	153278307	IRAK1	cerebral malaria	dom	M	0.0781595	0.115591	0.498931	1.08(0.86-1.36)	EH	877/0/678	226/0/183
Blantyre	Malawi	rs763737	153278307	IRAK1	cerebral malaria	dom	M	-0.0541505	0.118355	0.647294	0.95(0.75-1.19)	H	436/0/887	146/0/279
Buea	Cameroon	rs763737	153278307	IRAK1	cerebral malaria	dom	M	0.316008	0.47693	0.507595	1.37(0.54-3.49)	EH	200/0/197	8/0/11
Ho_Chi_Minh_City	VietNam	rs763737	153278307	IRAK1	cerebral malaria	dom	M	-0.0575089	0.209063	0.783255	0.94(0.63-1.42)	E	1048/0/281	130/0/32
Ibadan	Nigeria	rs763737	153278307	IRAK1	cerebral malaria	dom	M	-0.693147	1.1726	0.554441	0.5(0.05-4.98)	H	6/0/12	2/0/2
Kilifi	Kenya	rs763737	153278307	IRAK1	cerebral malaria	dom	M	-0.139296	0.110654	0.208084	0.87(0.7-1.08)	EH	651/0/1184	172/0/279
Kumasi	Ghana	rs763737	153278307	IRAK1	cerebral malaria	dom	M	-0.355057	0.212743	0.0951271	0.7(0.46-1.06)	EH	366/0/546	53/0/59
Madang	PapuaNewGuinea	rs763737	153278307	IRAK1	cerebral malaria	dom	M	0.991192	1.25135	0.428302	2.69(0.23-31.31)	E	127/0/2	24/0/1
Moshi	Tanzania	rs763737	153278307	IRAK1	cerebral malaria	dom	M	0.444081	0.567448	0.433866	1.56(0.51-4.74)	EH	74/0/131	5/0/12
Noguchi	Ghana	rs763737	153278307	IRAK1	cerebral malaria	dom	M	-1.75292	0.82925	0.034527	0.17(0.03-0.88)	EH	39/0/58	8/0/2
Ougadougou	BurkinaFaso	rs763737	153278307	IRAK1	cerebral malaria	dom	M	0.140256	0.292998	0.632158	1.15(0.65-2.04)	H	149/0/216	22/0/36
All	All	rs763737	153278307	IRAK1	cerebral malaria	dom	M	-0.0581834	0.0575723	0.312201	0.94(0.84-1.06)	EH	4059/0/4268	817/0/919
Bamako	Mali	rs763737	153278307	IRAK1	severe malarial anaemia	add	All	0.145167	0.114593	0.205224	1.16(0.92-1.45)	SEH	114/70/129	51/32/81
Banjul	Gambia	rs763737	153278307	IRAK1	severe malarial anaemia	add	All	-0.00346462	0.0597072	0.953727	1(0.89-1.12)	SEH	1375/786/979	211/98/148
Blantyre	Malawi	rs763737	153278307	IRAK1	severe malarial anaemia	add	All	0.00607921	0.11016	0.955991	1.01(0.81-1.25)	SH	598/523/1403	29/28/70
Buea	Cameroon	rs763737	153278307	IRAK1	severe malarial anaemia	add	All	0.352907	0.154523	0.0223806	1.42(1.05-1.93)	SEH	240/68/239	20/14/40
Ho_Chi_Minh_City	VietNam	rs763737	153278307	IRAK1	severe malarial anaemia	add	All	0.188887	0.226463	0.40424	1.21(0.77-1.88)	SE	1784/356/325	2004-08-19
Ibadan	Nigeria	rs763737	153278307	IRAK1	severe malarial anaemia	add	All	-0.146977	0.568344	0.795939	0.86(0.28-2.63)	SEH	7/14/17	2003-02-02
Kilifi	Kenya	rs763737	153278307	IRAK1	severe malarial anaemia	add	All	-0.062486	0.099927	0.531763	0.94(0.77-1.14)	SEH	920/861/1941	45/27/81
Kumasi	Ghana	rs763737	153278307	IRAK1	severe malarial anaemia	add	All	-0.0481665	0.0618683	0.436255	0.95(0.84-1.08)	SEH	537/422/897	154/122/257
Madang	PapuaNewGuinea	rs763737	153278307	IRAK1	severe malarial anaemia	add	All	0.0629508	0.446525	0.887886	1.06(0.44-2.56)	SE	232/8/2	111/3/2
Moshi	Tanzania	rs763737	153278307	IRAK1	severe malarial anaemia	add	All	-0.00135282	0.110586	0.99024	1(0.8-1.24)	SEH	99/106/249	42/36/101
Noguchi	Ghana	rs763737	153278307	IRAK1	severe malarial anaemia	add	All	-0.127468	0.117843	0.279396	0.88(0.7-1.11)	SEH	51/42/89	85/43/109
Ougadougou	BurkinaFaso	rs763737	153278307	IRAK1	severe malarial anaemia	add	All	-0.285788	0.193698	0.140096	0.75(0.51-1.1)	SH	211/145/355	2012-11-12
All	All	rs763737	153278307	IRAK1	severe malarial anaemia	add	All	-0.00434228	0.0308327	0.888001	1(0.94-1.06)	SEH	6168/3401/6625	781/424/908
Bamako	Mali	rs763737	153278307	IRAK1	severe malarial anaemia	rec	All	0.252803	0.203826	0.214868	1.29(0.86-1.92)	SEH	114/70/129	51/32/81
Banjul	Gambia	rs763737	153278307	IRAK1	severe malarial anaemia	rec	All	0.0543721	0.11409	0.633666	1.06(0.84-1.32)	SEH	1375/786/979	211/98/148
Blantyre	Malawi	rs763737	153278307	IRAK1	severe malarial anaemia	rec	All	-0.000646829	0.189525	0.997277	1(0.69-1.45)	SH	598/523/1403	29/28/70
Buea	Cameroon	rs763737	153278307	IRAK1	severe malarial anaemia	rec	All	0.661806	0.267785	0.0134582	1.94(1.15-3.28)	SEH	240/68/239	20/14/40
Ho_Chi_Minh_City	VietNam	rs763737	153278307	IRAK1	severe malarial anaemia	rec	All	0.0765744	0.541091	0.88746	1.08(0.37-3.12)	SE	1784/356/325	2004-08-19
Ibadan	Nigeria	rs763737	153278307	IRAK1	severe malarial anaemia	rec	All	-0.0328002	0.968886	0.972994	0.97(0.14-6.46)	SEH	7/14/17	2003-02-02
Kilifi	Kenya	rs763737	153278307	IRAK1	severe malarial anaemia	rec	All	-0.0231022	0.177574	0.896488	0.98(0.69-1.38)	SEH	920/861/1941	45/27/81
Kumasi	Ghana	rs763737	153278307	IRAK1	severe malarial anaemia	rec	All	-0.111976	0.110363	0.310289	0.89(0.72-1.11)	SEH	537/422/897	154/122/257
Madang	PapuaNewGuinea	rs763737	153278307	IRAK1	severe malarial anaemia	rec	All	0.837323	0.988954	0.397176	2.31(0.33-16.05)	SE	232/8/2	111/3/2
Moshi	Tanzania	rs763737	153278307	IRAK1	severe malarial anaemia	rec	All	-0.0714725	0.189952	0.706719	0.93(0.64-1.35)	SEH	99/106/249	42/36/101
Noguchi	Ghana	rs763737	153278307	IRAK1	severe malarial anaemia	rec	All	-0.184345	0.212311	0.385241	0.83(0.55-1.26)	SEH	51/42/89	85/43/109
Ougadougou	BurkinaFaso	rs763737	153278307	IRAK1	severe malarial anaemia	rec	All	-0.644496	0.361863	0.0749045	0.52(0.26-1.07)	SH	211/145/355	2012-11-12
All	All	rs763737	153278307	IRAK1	severe malarial anaemia	rec	All	0.00605029	0.0557493	0.913578	1.01(0.9-1.12)	SEH	6168/3401/6625	781/424/908
Bamako	Mali	rs763737	153278307	IRAK1	severe malarial anaemia	dom	All	0.251426	0.224372	0.262469	1.29(0.83-2)	SEH	114/70/129	51/32/81
Banjul	Gambia	rs763737	153278307	IRAK1	severe malarial anaemia	dom	All	-0.0580389	0.105828	0.583398	0.94(0.77-1.16)	SEH	1375/786/979	211/98/148
Blantyre	Malawi	rs763737	153278307	IRAK1	severe malarial anaemia	dom	All	0.025613	0.220893	0.90769	1.03(0.67-1.58)	SH	598/523/1403	29/28/70
Buea	Cameroon	rs763737	153278307	IRAK1	severe malarial anaemia	dom	All	0.547299	0.297755	0.0660501	1.73(0.96-3.1)	SEH	240/68/239	20/14/40
Ho_Chi_Minh_City	VietNam	rs763737	153278307	IRAK1	severe malarial anaemia	dom	All	0.41893	0.371029	0.258854	1.52(0.73-3.15)	SE	1784/356/325	2004-08-19
Ibadan	Nigeria	rs763737	153278307	IRAK1	severe malarial anaemia	dom	All	-0.503347	1.07684	0.640192	0.6(0.07-4.99)	SEH	7/14/17	2003-02-02
Kilifi	Kenya	rs763737	153278307	IRAK1	severe malarial anaemia	dom	All	-0.214403	0.189006	0.256638	0.81(0.56-1.17)	SEH	920/861/1941	45/27/81
Kumasi	Ghana	rs763737	153278307	IRAK1	severe malarial anaemia	dom	All	-0.0493122	0.121773	0.685514	0.95(0.75-1.21)	SEH	537/422/897	154/122/257
Madang	PapuaNewGuinea	rs763737	153278307	IRAK1	severe malarial anaemia	dom	All	-0.15091	0.622708	0.808513	0.86(0.25-2.91)	SE	232/8/2	111/3/2
Moshi	Tanzania	rs763737	153278307	IRAK1	severe malarial anaemia	dom	All	0.0940526	0.229904	0.68247	1.1(0.7-1.72)	SEH	99/106/249	42/36/101
Noguchi	Ghana	rs763737	153278307	IRAK1	severe malarial anaemia	dom	All	-0.270146	0.229678	0.239516	0.76(0.49-1.2)	SEH	51/42/89	85/43/109
Ougadougou	BurkinaFaso	rs763737	153278307	IRAK1	severe malarial anaemia	dom	All	-0.315515	0.381003	0.407605	0.73(0.35-1.54)	SH	211/145/355	2012-11-12
All	All	rs763737	153278307	IRAK1	severe malarial anaemia	dom	All	-0.0223298	0.0586279	0.703297	0.98(0.87-1.1)	SEH	6168/3401/6625	781/424/908
Bamako	Mali	rs763737	153278307	IRAK1	severe malarial anaemia	add	F	0.00756951	0.207784	0.97094	1.01(0.67-1.51)	EH	28/70/53	16/32/26
Banjul	Gambia	rs763737	153278307	IRAK1	severe malarial anaemia	add	F	0.00356595	0.104682	0.972826	1(0.82-1.23)	EH	498/786/301	76/98/45
Blantyre	Malawi	rs763737	153278307	IRAK1	severe malarial anaemia	add	F	0.0725076	0.190235	0.703093	1.08(0.74-1.56)	H	162/523/516	7/28/28
Buea	Cameroon	rs763737	153278307	IRAK1	severe malarial anaemia	add	F	0.331151	0.258185	0.199629	1.39(0.84-2.31)	EH	40/68/42	8/14/16
Ho_Chi_Minh_City	VietNam	rs763737	153278307	IRAK1	severe malarial anaemia	add	F	0.224124	0.414248	0.588482	1.25(0.56-2.82)	E	736/356/44	2000-08-09
Ibadan	Nigeria	rs763737	153278307	IRAK1	severe malarial anaemia	add	F	-0.153267	1.00019	0.87821	0.86(0.12-6.09)	EH	1/14/5	2001-02-01
Kilifi	Kenya	rs763737	153278307	IRAK1	severe malarial anaemia	add	F	0.118672	0.183135	0.516982	1.13(0.79-1.61)	EH	269/861/757	10/27/33
Kumasi	Ghana	rs763737	153278307	IRAK1	severe malarial anaemia	add	F	-0.157896	0.108472	0.145491	0.85(0.69-1.06)	EH	171/422/351	49/122/82
Madang	PapuaNewGuinea	rs763737	153278307	IRAK1	severe malarial anaemia	add	F	0.0797998	0.578515	0.890289	1.08(0.35-3.37)	E	105/8/0	58/3/1
Moshi	Tanzania	rs763737	153278307	IRAK1	severe malarial anaemia	add	F	-0.43271	0.208018	0.0375108	0.65(0.43-0.98)	EH	25/106/118	11/36/25
Noguchi	Ghana	rs763737	153278307	IRAK1	severe malarial anaemia	add	F	-0.146856	0.229296	0.521871	0.86(0.55-1.35)	EH	12/42/31	19/43/28
Ougadougou	BurkinaFaso	rs763737	153278307	IRAK1	severe malarial anaemia	add	F	-0.455691	0.319495	0.153786	0.63(0.34-1.19)	H	62/145/139	2004-11-04
All	All	rs763737	153278307	IRAK1	severe malarial anaemia	add	F	-0.0555343	0.0545914	0.309025	0.95(0.85-1.05)	EH	2109/3401/2357	268/424/289
Bamako	Mali	rs763737	153278307	IRAK1	severe malarial anaemia	rec	F	0.0525908	0.313064	0.866593	1.05(0.57-1.95)	EH	28/70/53	16/32/26
Banjul	Gambia	rs763737	153278307	IRAK1	severe malarial anaemia	rec	F	0.161249	0.182039	0.375728	1.17(0.82-1.68)	EH	498/786/301	76/98/45
Blantyre	Malawi	rs763737	153278307	IRAK1	severe malarial anaemia	rec	F	0.050724	0.260507	0.845618	1.05(0.63-1.75)	H	162/523/516	7/28/28
Buea	Cameroon	rs763737	153278307	IRAK1	severe malarial anaemia	rec	F	0.57628	0.394003	0.143569	1.78(0.82-3.85)	EH	40/68/42	8/14/16
Ho_Chi_Minh_City	VietNam	rs763737	153278307	IRAK1	severe malarial anaemia	rec	F	-14.3672	966.355	0.988138	0(0-Inf)	E	736/356/44	2000-08-09
Ibadan	Nigeria	rs763737	153278307	IRAK1	severe malarial anaemia	rec	F	0.0801685	1.33632	0.952162	1.08(0.08-14.87)	EH	1/14/5	2001-02-01
Kilifi	Kenya	rs763737	153278307	IRAK1	severe malarial anaemia	rec	F	0.263856	0.248308	0.287956	1.3(0.8-2.12)	EH	269/861/757	10/27/33
Kumasi	Ghana	rs763737	153278307	IRAK1	severe malarial anaemia	rec	F	-0.259199	0.166872	0.120356	0.77(0.56-1.07)	EH	171/422/351	49/122/82
Madang	PapuaNewGuinea	rs763737	153278307	IRAK1	severe malarial anaemia	rec	F	18.2372	3956.18	0.996322	83239850.23(0-Inf)	E	105/8/0	58/3/1
Moshi	Tanzania	rs763737	153278307	IRAK1	severe malarial anaemia	rec	F	-0.591153	0.293008	0.04364	0.55(0.31-0.98)	EH	25/106/118	11/36/25
Noguchi	Ghana	rs763737	153278307	IRAK1	severe malarial anaemia	rec	F	-0.0998327	0.337213	0.76719	0.9(0.47-1.75)	EH	12/42/31	19/43/28
Ougadougou	BurkinaFaso	rs763737	153278307	IRAK1	severe malarial anaemia	rec	F	-0.979804	0.574303	0.0879938	0.38(0.12-1.16)	H	62/145/139	2004-11-04
All	All	rs763737	153278307	IRAK1	severe malarial anaemia	rec	F	-0.0515634	0.0849056	0.54365	0.95(0.8-1.12)	EH	2109/3401/2357	268/424/289
Bamako	Mali	rs763737	153278307	IRAK1	severe malarial anaemia	dom	F	-0.0509694	0.37532	0.891977	0.95(0.46-1.98)	EH	28/70/53	16/32/26
Banjul	Gambia	rs763737	153278307	IRAK1	severe malarial anaemia	dom	F	-0.106098	0.154688	0.492785	0.9(0.66-1.22)	EH	498/786/301	76/98/45
Blantyre	Malawi	rs763737	153278307	IRAK1	severe malarial anaemia	dom	F	0.201039	0.410303	0.624151	1.22(0.55-2.73)	H	162/523/516	7/28/28
Buea	Cameroon	rs763737	153278307	IRAK1	severe malarial anaemia	dom	F	0.295341	0.45407	0.515414	1.34(0.55-3.27)	EH	40/68/42	8/14/16
Ho_Chi_Minh_City	VietNam	rs763737	153278307	IRAK1	severe malarial anaemia	dom	F	0.468333	0.492734	0.34187	1.6(0.61-4.2)	E	736/356/44	2000-08-09
Ibadan	Nigeria	rs763737	153278307	IRAK1	severe malarial anaemia	dom	F	-0.693147	1.87083	0.711008	0.5(0.01-19.56)	EH	1/14/5	2001-02-01
Kilifi	Kenya	rs763737	153278307	IRAK1	severe malarial anaemia	dom	F	-0.0787509	0.350046	0.822	0.92(0.47-1.84)	EH	269/861/757	10/27/33
Kumasi	Ghana	rs763737	153278307	IRAK1	severe malarial anaemia	dom	F	-0.152114	0.197675	0.441587	0.86(0.58-1.27)	EH	171/422/351	49/122/82
Madang	PapuaNewGuinea	rs763737	153278307	IRAK1	severe malarial anaemia	dom	F	-0.188191	0.675824	0.780658	0.83(0.22-3.12)	E	105/8/0	58/3/1
Moshi	Tanzania	rs763737	153278307	IRAK1	severe malarial anaemia	dom	F	-0.51098	0.412502	0.215444	0.6(0.27-1.35)	EH	25/106/118	11/36/25
Noguchi	Ghana	rs763737	153278307	IRAK1	severe malarial anaemia	dom	F	-0.336661	0.421416	0.424359	0.71(0.31-1.63)	EH	12/42/31	19/43/28
Ougadougou	BurkinaFaso	rs763737	153278307	IRAK1	severe malarial anaemia	dom	F	-0.268634	0.582564	0.64471	0.76(0.24-2.39)	H	62/145/139	2004-11-04
All	All	rs763737	153278307	IRAK1	severe malarial anaemia	dom	F	-0.100535	0.0931636	0.280531	0.9(0.75-1.09)	EH	2109/3401/2357	268/424/289
Bamako	Mali	rs763737	153278307	IRAK1	severe malarial anaemia	het	F	-0.0798113	0.298632	0.789272	0.92(0.51-1.66)	EH	28/70/53	16/32/26
Banjul	Gambia	rs763737	153278307	IRAK1	severe malarial anaemia	het	F	-0.195537	0.147111	0.183788	0.82(0.62-1.1)	EH	498/786/301	76/98/45
Blantyre	Malawi	rs763737	153278307	IRAK1	severe malarial anaemia	het	F	0.0364252	0.260494	0.888793	1.04(0.62-1.73)	H	162/523/516	7/28/28
Buea	Cameroon	rs763737	153278307	IRAK1	severe malarial anaemia	het	F	-0.308362	0.38677	0.425291	0.73(0.34-1.57)	EH	40/68/42	8/14/16
Ho_Chi_Minh_City	VietNam	rs763737	153278307	IRAK1	severe malarial anaemia	het	F	0.639149	0.492658	0.194511	1.89(0.72-4.98)	E	736/356/44	2000-08-09
Ibadan	Nigeria	rs763737	153278307	IRAK1	severe malarial anaemia	het	F	-0.369018	1.21526	0.761392	0.69(0.06-7.48)	EH	1/14/5	2001-02-01
Kilifi	Kenya	rs763737	153278307	IRAK1	severe malarial anaemia	het	F	-0.306593	0.2547	0.22869	0.74(0.45-1.21)	EH	269/861/757	10/27/33
Kumasi	Ghana	rs763737	153278307	IRAK1	severe malarial anaemia	het	F	0.143424	0.157531	0.362588	1.15(0.85-1.57)	EH	171/422/351	49/122/82
Madang	PapuaNewGuinea	rs763737	153278307	IRAK1	severe malarial anaemia	het	F	-0.552401	0.746119	0.459078	0.58(0.13-2.48)	E	105/8/0	58/3/1
Moshi	Tanzania	rs763737	153278307	IRAK1	severe malarial anaemia	het	F	0.347042	0.283037	0.220147	1.41(0.81-2.46)	EH	25/106/118	11/36/25
Noguchi	Ghana	rs763737	153278307	IRAK1	severe malarial anaemia	het	F	-0.104748	0.316369	0.740572	0.9(0.48-1.67)	EH	12/42/31	19/43/28
Ougadougou	BurkinaFaso	rs763737	153278307	IRAK1	severe malarial anaemia	het	F	0.660405	0.478608	0.167634	1.94(0.76-4.95)	H	62/145/139	2004-11-04
All	All	rs763737	153278307	IRAK1	severe malarial anaemia	het	F	-0.0249574	0.0768427	0.745344	0.98(0.84-1.13)	EH	2109/3401/2357	268/424/289
Bamako	Mali	rs763737	153278307	IRAK1	severe malarial anaemia	dom	M	0.456592	0.277634	0.100056	1.58(0.92-2.72)	EH	86/0/76	35/0/55
Banjul	Gambia	rs763737	153278307	IRAK1	severe malarial anaemia	dom	M	-0.00862343	0.142574	0.95177	0.99(0.75-1.31)	EH	877/0/678	135/0/103
Blantyre	Malawi	rs763737	153278307	IRAK1	severe malarial anaemia	dom	M	-0.0560895	0.269923	0.835387	0.95(0.56-1.6)	H	436/0/887	22/0/42
Buea	Cameroon	rs763737	153278307	IRAK1	severe malarial anaemia	dom	M	0.718794	0.378389	0.0574834	2.05(0.98-4.31)	EH	200/0/197	12/0/24
Ho_Chi_Minh_City	VietNam	rs763737	153278307	IRAK1	severe malarial anaemia	dom	M	0.338565	0.599366	0.572161	1.4(0.43-4.54)	E	1048/0/281	10/0/4
Ibadan	Nigeria	rs763737	153278307	IRAK1	severe malarial anaemia	dom	M	3.54308e-16	1.32626	1	1(0.07-13.46)	H	6/0/12	1/0/2
Kilifi	Kenya	rs763737	153278307	IRAK1	severe malarial anaemia	dom	M	-0.274067	0.22964	0.232688	0.76(0.48-1.19)	EH	651/0/1184	35/0/48
Kumasi	Ghana	rs763737	153278307	IRAK1	severe malarial anaemia	dom	M	0.0124658	0.153134	0.93512	1.01(0.75-1.37)	EH	366/0/546	105/0/175
Madang	PapuaNewGuinea	rs763737	153278307	IRAK1	severe malarial anaemia	dom	M	0.218002	1.23933	0.86037	1.24(0.11-14.11)	E	127/0/2	53/0/1
Moshi	Tanzania	rs763737	153278307	IRAK1	severe malarial anaemia	dom	M	0.39181	0.274218	0.153054	1.48(0.86-2.53)	EH	74/0/131	31/0/76
Noguchi	Ghana	rs763737	153278307	IRAK1	severe malarial anaemia	dom	M	-0.224301	0.274997	0.414702	0.8(0.47-1.37)	EH	39/0/58	66/0/81
Ougadougou	BurkinaFaso	rs763737	153278307	IRAK1	severe malarial anaemia	dom	M	-0.352221	0.51246	0.491886	0.7(0.26-1.92)	H	149/0/216	8/0/8
All	All	rs763737	153278307	IRAK1	severe malarial anaemia	dom	M	0.0433258	0.0747791	0.56233	1.04(0.9-1.21)	EH	4059/0/4268	513/0/619
Bamako	Mali	rs763737	153278307	IRAK1	cerebral malaria and severe malaria1 anaemia	add	All	0.243757	0.175071	0.163823	1.28(0.91-1.8)	SEH	114/70/129	18/18/30
Banjul	Gambia	rs763737	153278307	IRAK1	cerebral malaria and severe malaria1 anaemia	add	All	-0.0695609	0.102408	0.496979	0.93(0.76-1.14)	SEH	1375/786/979	62/38/34
Blantyre	Malawi	rs763737	153278307	IRAK1	cerebral malaria and severe malaria1 anaemia	add	All	0.0458619	0.0975932	0.638405	1.05(0.86-1.27)	SH	598/523/1403	33/35/88
Buea	Cameroon	rs763737	153278307	IRAK1	cerebral malaria and severe malaria1 anaemia	add	All	0.18917	0.491737	0.700462	1.21(0.46-3.17)	SEH	240/68/239	2003-01-02
Ho_Chi_Minh_City	VietNam	rs763737	153278307	IRAK1	cerebral malaria and severe malaria1 anaemia	add	All	-0.0535018	0.712739	0.940163	0.95(0.23-3.83)	SE	1784/356/325	2001-01-06
Ibadan	Nigeria	rs763737	153278307	IRAK1	cerebral malaria and severe malaria1 anaemia	add	All	1.11254e-15	0.217717	1	1(0.65-1.53)	SEH	7/14/17	0/0/0
Kilifi	Kenya	rs763737	153278307	IRAK1	cerebral malaria and severe malaria1 anaemia	add	All	0.0556399	0.0911334	0.541509	1.06(0.88-1.26)	SEH	920/861/1941	52/37/119
Kumasi	Ghana	rs763737	153278307	IRAK1	cerebral malaria and severe malaria1 anaemia	add	All	0.0599765	0.139587	0.667436	1.06(0.81-1.4)	SEH	537/422/897	1941-12-22
Madang	PapuaNewGuinea	rs763737	153278307	IRAK1	cerebral malaria and severe malaria1 anaemia	add	All	-16.1881	0.909418	7.00517e-71	0(0-0)	SE	232/8/2	9/0/0
Moshi	Tanzania	rs763737	153278307	IRAK1	cerebral malaria and severe malaria1 anaemia	add	All	0.269783	0.281505	0.337881	1.31(0.75-2.27)	SEH	99/106/249	2017-07-03
Noguchi	Ghana	rs763737	153278307	IRAK1	cerebral malaria and severe malaria1 anaemia	add	All	0.767796	0.404684	0.0577921	2.16(0.97-4.76)	SEH	51/42/89	2009-02-02
Ougadougou	BurkinaFaso	rs763737	153278307	IRAK1	cerebral malaria and severe malaria1 anaemia	add	All	-0.452642	0.267339	0.0904294	0.64(0.38-1.07)	SH	211/145/355	2007-03-10
All	All	rs763737	153278307	IRAK1	cerebral malaria and severe malaria1 anaemia	add	All	0.0413365	0.0468649	0.377758	1.04(0.95-1.14)	SEH	5936/3393/6623	210/154/349
Bamako	Mali	rs763737	153278307	IRAK1	cerebral malaria and severe malaria1 anaemia	rec	All	0.309156	0.304472	0.309923	1.36(0.75-2.47)	SEH	114/70/129	18/18/30
Banjul	Gambia	rs763737	153278307	IRAK1	cerebral malaria and severe malaria1 anaemia	rec	All	-0.252192	0.207282	0.223734	0.78(0.52-1.17)	SEH	1375/786/979	62/38/34
Blantyre	Malawi	rs763737	153278307	IRAK1	cerebral malaria and severe malaria1 anaemia	rec	All	-0.000352604	0.168884	0.998334	1(0.72-1.39)	SH	598/523/1403	33/35/88
Buea	Cameroon	rs763737	153278307	IRAK1	cerebral malaria and severe malaria1 anaemia	rec	All	0.458333	0.92442	0.620031	1.58(0.26-9.68)	SEH	240/68/239	2003-01-02
Ho_Chi_Minh_City	VietNam	rs763737	153278307	IRAK1	cerebral malaria and severe malaria1 anaemia	rec	All	0.859022	1.26524	0.497175	2.36(0.2-28.19)	SE	1784/356/325	2001-01-06
Ibadan	Nigeria	rs763737	153278307	IRAK1	cerebral malaria and severe malaria1 anaemia	rec	All	-1.21016e-15	0.360905	1	1(0.49-2.03)	SEH	7/14/17	0/0/0
Kilifi	Kenya	rs763737	153278307	IRAK1	cerebral malaria and severe malaria1 anaemia	rec	All	0.187916	0.150927	0.213105	1.21(0.9-1.62)	SEH	920/861/1941	52/37/119
Kumasi	Ghana	rs763737	153278307	IRAK1	cerebral malaria and severe malaria1 anaemia	rec	All	0.0456478	0.258677	0.859927	1.05(0.63-1.74)	SEH	537/422/897	1941-12-22
Madang	PapuaNewGuinea	rs763737	153278307	IRAK1	cerebral malaria and severe malaria1 anaemia	rec	All	-15.8806	0.94319	1.30499e-63	0(0-0)	SE	232/8/2	9/0/0
Moshi	Tanzania	rs763737	153278307	IRAK1	cerebral malaria and severe malaria1 anaemia	rec	All	0.264883	0.43036	0.53823	1.3(0.56-3.03)	SEH	99/106/249	2017-07-03
Noguchi	Ghana	rs763737	153278307	IRAK1	cerebral malaria and severe malaria1 anaemia	rec	All	1.37593	0.576295	0.016961	3.96(1.28-12.25)	SEH	51/42/89	2009-02-02
Ougadougou	BurkinaFaso	rs763737	153278307	IRAK1	cerebral malaria and severe malaria1 anaemia	rec	All	-0.675952	0.491306	0.168875	0.51(0.19-1.33)	SH	211/145/355	2007-03-10
All	All	rs763737	153278307	IRAK1	cerebral malaria and severe malaria1 anaemia	rec	All	0.0631172	0.0821333	0.442206	1.07(0.91-1.25)	SEH	5936/3393/6623	210/154/349
Bamako	Mali	rs763737	153278307	IRAK1	cerebral malaria and severe malaria1 anaemia	dom	All	0.544449	0.344745	0.114272	1.72(0.88-3.39)	SEH	114/70/129	18/18/30
Banjul	Gambia	rs763737	153278307	IRAK1	cerebral malaria and severe malaria1 anaemia	dom	All	-0.0133374	0.183285	0.94199	0.99(0.69-1.41)	SEH	1375/786/979	62/38/34
Blantyre	Malawi	rs763737	153278307	IRAK1	cerebral malaria and severe malaria1 anaemia	dom	All	0.191145	0.205893	0.353215	1.21(0.81-1.81)	SH	598/523/1403	33/35/88
Buea	Cameroon	rs763737	153278307	IRAK1	cerebral malaria and severe malaria1 anaemia	dom	All	0.167762	0.769068	0.827323	1.18(0.26-5.34)	SEH	240/68/239	2003-01-02
Ho_Chi_Minh_City	VietNam	rs763737	153278307	IRAK1	cerebral malaria and severe malaria1 anaemia	dom	All	-0.410581	0.81208	0.613143	0.66(0.14-3.26)	SE	1784/356/325	2001-01-06
Ibadan	Nigeria	rs763737	153278307	IRAK1	cerebral malaria and severe malaria1 anaemia	dom	All	-4.66174e-15	0.454606	1	1(0.41-2.44)	SEH	7/14/17	0/0/0
Kilifi	Kenya	rs763737	153278307	IRAK1	cerebral malaria and severe malaria1 anaemia	dom	All	-0.03486	0.1779	0.844647	0.97(0.68-1.37)	SEH	920/861/1941	52/37/119
Kumasi	Ghana	rs763737	153278307	IRAK1	cerebral malaria and severe malaria1 anaemia	dom	All	0.18428	0.280128	0.51064	1.2(0.69-2.08)	SEH	537/422/897	1941-12-22
Madang	PapuaNewGuinea	rs763737	153278307	IRAK1	cerebral malaria and severe malaria1 anaemia	dom	All	-16.563	0.831089	2.26773e-88	0(0-0)	SE	232/8/2	9/0/0
Moshi	Tanzania	rs763737	153278307	IRAK1	cerebral malaria and severe malaria1 anaemia	dom	All	0.790812	0.727763	0.277198	2.21(0.53-9.18)	SEH	99/106/249	2017-07-03
Noguchi	Ghana	rs763737	153278307	IRAK1	cerebral malaria and severe malaria1 anaemia	dom	All	0.984779	0.845843	0.24432	2.68(0.51-14.05)	SEH	51/42/89	2009-02-02
Ougadougou	BurkinaFaso	rs763737	153278307	IRAK1	cerebral malaria and severe malaria1 anaemia	dom	All	-0.90546	0.476902	0.0576134	0.4(0.16-1.03)	SH	211/145/355	2007-03-10
All	All	rs763737	153278307	IRAK1	cerebral malaria and severe malaria1 anaemia	dom	All	0.080049	0.0920674	0.384595	1.08(0.9-1.3)	SEH	5936/3393/6623	210/154/349
Bamako	Mali	rs763737	153278307	IRAK1	cerebral malaria and severe malaria1 anaemia	add	F	0.45455	0.304632	0.135665	1.58(0.87-2.86)	EH	28/70/53	3/18/14
Banjul	Gambia	rs763737	153278307	IRAK1	cerebral malaria and severe malaria1 anaemia	add	F	-0.0952679	0.189365	0.6149	0.91(0.63-1.32)	EH	498/786/301	19/38/7
Blantyre	Malawi	rs763737	153278307	IRAK1	cerebral malaria and severe malaria1 anaemia	add	F	-0.0201721	0.180121	0.91083	0.98(0.69-1.39)	H	162/523/516	7/35/27
Buea	Cameroon	rs763737	153278307	IRAK1	cerebral malaria and severe malaria1 anaemia	add	F	1.47851	1.0985	0.178325	4.39(0.51-37.77)	EH	40/68/42	0/1/2
Ho_Chi_Minh_City	VietNam	rs763737	153278307	IRAK1	cerebral malaria and severe malaria1 anaemia	add	F	0.114616	0.65008	0.86005	1.12(0.31-4.01)	E	736/356/44	2001-01-05
Ibadan	Nigeria	rs763737	153278307	IRAK1	cerebral malaria and severe malaria1 anaemia	add	F	2.07751e-16	96598.2	1	1(0-Inf)	EH	1/14/5	0/0/0
Kilifi	Kenya	rs763737	153278307	IRAK1	cerebral malaria and severe malaria1 anaemia	add	F	-0.0030941	0.147034	0.983211	1(0.75-1.33)	EH	269/861/757	19/37/49
Kumasi	Ghana	rs763737	153278307	IRAK1	cerebral malaria and severe malaria1 anaemia	add	F	0.171643	0.316625	0.587748	1.19(0.64-2.21)	EH	171/422/351	2010-12-04
Madang	PapuaNewGuinea	rs763737	153278307	IRAK1	cerebral malaria and severe malaria1 anaemia	add	F	-16.7998	3363.84	0.996015	0(0-Inf)	E	105/8/0	5/0/0
Moshi	Tanzania	rs763737	153278307	IRAK1	cerebral malaria and severe malaria1 anaemia	add	F	-0.450459	0.408629	0.270303	0.64(0.29-1.42)	EH	25/106/118	2005-07-02
Noguchi	Ghana	rs763737	153278307	IRAK1	cerebral malaria and severe malaria1 anaemia	add	F	0.0628421	0.605051	0.917278	1.06(0.33-3.49)	EH	12/42/31	2003-02-02
Ougadougou	BurkinaFaso	rs763737	153278307	IRAK1	cerebral malaria and severe malaria1 anaemia	add	F	-0.446058	0.451167	0.322822	0.64(0.26-1.55)	H	62/145/139	2003-03-03
All	All	rs763737	153278307	IRAK1	cerebral malaria and severe malaria1 anaemia	add	F	0.00817212	0.0834239	0.921965	1.01(0.86-1.19)	EH	2004/3393/2357	64/154/121
Bamako	Mali	rs763737	153278307	IRAK1	cerebral malaria and severe malaria1 anaemia	rec	F	0.358081	0.427111	0.401818	1.43(0.62-3.3)	EH	28/70/53	3/18/14
Banjul	Gambia	rs763737	153278307	IRAK1	cerebral malaria and severe malaria1 anaemia	rec	F	-0.549625	0.408295	0.178255	0.58(0.26-1.28)	EH	498/786/301	19/38/7
Blantyre	Malawi	rs763737	153278307	IRAK1	cerebral malaria and severe malaria1 anaemia	rec	F	-0.167965	0.25382	0.508132	0.85(0.51-1.39)	H	162/523/516	7/35/27
Buea	Cameroon	rs763737	153278307	IRAK1	cerebral malaria and severe malaria1 anaemia	rec	F	1.62829	1.24436	0.190691	5.1(0.44-58.39)	EH	40/68/42	0/1/2
Ho_Chi_Minh_City	VietNam	rs763737	153278307	IRAK1	cerebral malaria and severe malaria1 anaemia	rec	F	1.40788	1.09153	0.197112	4.09(0.48-34.72)	E	736/356/44	2001-01-05
Ibadan	Nigeria	rs763737	153278307	IRAK1	cerebral malaria and severe malaria1 anaemia	rec	F	2.83297e-16	112802	1	1(0-Inf)	EH	1/14/5	0/0/0
Kilifi	Kenya	rs763737	153278307	IRAK1	cerebral malaria and severe malaria1 anaemia	rec	F	0.185347	0.204532	0.364829	1.2(0.81-1.8)	EH	269/861/757	19/37/49
Kumasi	Ghana	rs763737	153278307	IRAK1	cerebral malaria and severe malaria1 anaemia	rec	F	0.0196337	0.455412	0.965612	1.02(0.42-2.49)	EH	171/422/351	2010-12-04
Madang	PapuaNewGuinea	rs763737	153278307	IRAK1	cerebral malaria and severe malaria1 anaemia	rec	F	NA	NA	NA	NA(NA-NA)	E	105/8/0	5/0/0
Moshi	Tanzania	rs763737	153278307	IRAK1	cerebral malaria and severe malaria1 anaemia	rec	F	-0.626557	0.588944	0.28739	0.53(0.17-1.7)	EH	25/106/118	2005-07-02
Noguchi	Ghana	rs763737	153278307	IRAK1	cerebral malaria and severe malaria1 anaemia	rec	F	0.635736	0.848769	0.453852	1.89(0.36-9.97)	EH	12/42/31	2003-02-02
Ougadougou	BurkinaFaso	rs763737	153278307	IRAK1	cerebral malaria and severe malaria1 anaemia	rec	F	-0.351195	0.71635	0.623952	0.7(0.17-2.87)	H	62/145/139	2003-03-03
All	All	rs763737	153278307	IRAK1	cerebral malaria and severe malaria1 anaemia	rec	F	-0.000395551	0.123584	0.997446	1(0.78-1.27)	EH	2004/3393/2357	64/154/121
Bamako	Mali	rs763737	153278307	IRAK1	cerebral malaria and severe malaria1 anaemia	dom	F	1.08514	0.664811	0.102627	2.96(0.8-10.89)	EH	28/70/53	3/18/14
Banjul	Gambia	rs763737	153278307	IRAK1	cerebral malaria and severe malaria1 anaemia	dom	F	0.102564	0.281319	0.715422	1.11(0.64-1.92)	EH	498/786/301	19/38/7
Blantyre	Malawi	rs763737	153278307	IRAK1	cerebral malaria and severe malaria1 anaemia	dom	F	0.302821	0.408192	0.458172	1.35(0.61-3.01)	H	162/523/516	7/35/27
Buea	Cameroon	rs763737	153278307	IRAK1	cerebral malaria and severe malaria1 anaemia	dom	F	17.6988	4343.94	0.996749	48584052.68(0-Inf)	EH	40/68/42	0/1/2
Ho_Chi_Minh_City	VietNam	rs763737	153278307	IRAK1	cerebral malaria and severe malaria1 anaemia	dom	F	-0.304624	0.839101	0.716578	0.74(0.14-3.82)	E	736/356/44	2001-01-05
Ibadan	Nigeria	rs763737	153278307	IRAK1	cerebral malaria and severe malaria1 anaemia	dom	F	-1.49266e-30	264545	1	1(0-Inf)	EH	1/14/5	0/0/0
Kilifi	Kenya	rs763737	153278307	IRAK1	cerebral malaria and severe malaria1 anaemia	dom	F	-0.35571	0.266889	0.182598	0.7(0.42-1.18)	EH	269/861/757	19/37/49
Kumasi	Ghana	rs763737	153278307	IRAK1	cerebral malaria and severe malaria1 anaemia	dom	F	0.710653	0.749517	0.343054	2.04(0.47-8.84)	EH	171/422/351	2010-12-04
Madang	PapuaNewGuinea	rs763737	153278307	IRAK1	cerebral malaria and severe malaria1 anaemia	dom	F	-16.7998	3363.84	0.996015	0(0-Inf)	E	105/8/0	5/0/0
Moshi	Tanzania	rs763737	153278307	IRAK1	cerebral malaria and severe malaria1 anaemia	dom	F	-0.540653	0.825573	0.512544	0.58(0.12-2.94)	EH	25/106/118	2005-07-02
Noguchi	Ghana	rs763737	153278307	IRAK1	cerebral malaria and severe malaria1 anaemia	dom	F	-0.68912	0.959509	0.472633	0.5(0.08-3.29)	EH	12/42/31	2003-02-02
Ougadougou	BurkinaFaso	rs763737	153278307	IRAK1	cerebral malaria and severe malaria1 anaemia	dom	F	-0.897243	0.72299	0.214599	0.41(0.1-1.68)	H	62/145/139	2003-03-03
All	All	rs763737	153278307	IRAK1	cerebral malaria and severe malaria1 anaemia	dom	F	0.0275465	0.151952	0.856144	1.03(0.76-1.38)	EH	2004/3393/2357	64/154/121
Bamako	Mali	rs763737	153278307	IRAK1	cerebral malaria and severe malaria1 anaemia	het	F	0.207671	0.405626	0.608667	1.23(0.56-2.73)	EH	28/70/53	3/18/14
Banjul	Gambia	rs763737	153278307	IRAK1	cerebral malaria and severe malaria1 anaemia	het	F	0.355615	0.261418	0.173726	1.43(0.85-2.38)	EH	498/786/301	19/38/7
Blantyre	Malawi	rs763737	153278307	IRAK1	cerebral malaria and severe malaria1 anaemia	het	F	0.288556	0.248102	0.244807	1.33(0.82-2.17)	H	162/523/516	7/35/27
Buea	Cameroon	rs763737	153278307	IRAK1	cerebral malaria and severe malaria1 anaemia	het	F	-0.604821	1.24006	0.625738	0.55(0.05-6.21)	EH	40/68/42	0/1/2
Ho_Chi_Minh_City	VietNam	rs763737	153278307	IRAK1	cerebral malaria and severe malaria1 anaemia	het	F	-1.0033	1.08213	0.353847	0.37(0.04-3.06)	E	736/356/44	2001-01-05
Ibadan	Nigeria	rs763737	153278307	IRAK1	cerebral malaria and severe malaria1 anaemia	het	F	-1.78496e-14	112802	1	1(0-Inf)	EH	1/14/5	0/0/0
Kilifi	Kenya	rs763737	153278307	IRAK1	cerebral malaria and severe malaria1 anaemia	het	F	-0.388124	0.212487	0.0677633	0.68(0.45-1.03)	EH	269/861/757	19/37/49
Kumasi	Ghana	rs763737	153278307	IRAK1	cerebral malaria and severe malaria1 anaemia	het	F	0.307816	0.443505	0.48765	1.36(0.57-3.24)	EH	171/422/351	2010-12-04
Madang	PapuaNewGuinea	rs763737	153278307	IRAK1	cerebral malaria and severe malaria1 anaemia	het	F	-16.7998	3363.84	0.996015	0(0-Inf)	E	105/8/0	5/0/0
Moshi	Tanzania	rs763737	153278307	IRAK1	cerebral malaria and severe malaria1 anaemia	het	F	0.402119	0.572427	0.482379	1.49(0.49-4.59)	EH	25/106/118	2005-07-02
Noguchi	Ghana	rs763737	153278307	IRAK1	cerebral malaria and severe malaria1 anaemia	het	F	-1.07184	0.892697	0.229877	0.34(0.06-1.97)	EH	12/42/31	2003-02-02
Ougadougou	BurkinaFaso	rs763737	153278307	IRAK1	cerebral malaria and severe malaria1 anaemia	het	F	-0.351195	0.71635	0.623952	0.7(0.17-2.87)	H	62/145/139	2003-03-03
All	All	rs763737	153278307	IRAK1	cerebral malaria and severe malaria1 anaemia	het	F	0.0163808	0.115521	0.887238	1.02(0.81-1.27)	EH	2004/3393/2357	64/154/121
Bamako	Mali	rs763737	153278307	IRAK1	cerebral malaria and severe malaria1 anaemia	dom	M	0.319785	0.421547	0.448093	1.38(0.6-3.15)	EH	86/0/76	15/0/16
Banjul	Gambia	rs763737	153278307	IRAK1	cerebral malaria and severe malaria1 anaemia	dom	M	-0.120401	0.256106	0.638269	0.89(0.54-1.46)	EH	877/0/678	43/0/27
Blantyre	Malawi	rs763737	153278307	IRAK1	cerebral malaria and severe malaria1 anaemia	dom	M	0.150061	0.241763	0.534801	1.16(0.72-1.87)	H	436/0/887	26/0/61
Buea	Cameroon	rs763737	153278307	IRAK1	cerebral malaria and severe malaria1 anaemia	dom	M	-0.683931	1.23176	0.578727	0.5(0.05-5.64)	EH	200/0/197	2/0/1
Ho_Chi_Minh_City	VietNam	rs763737	153278307	IRAK1	cerebral malaria and severe malaria1 anaemia	dom	M	-16.5544	4677.38	0.997176	0(0-Inf)	E	1048/0/281	1/0/0
Ibadan	Nigeria	rs763737	153278307	IRAK1	cerebral malaria and severe malaria1 anaemia	dom	M	9.08378e-16	108000	1	1(0-Inf)	H	6/0/12	0/0/0
Kilifi	Kenya	rs763737	153278307	IRAK1	cerebral malaria and severe malaria1 anaemia	dom	M	0.180336	0.221753	0.416085	1.2(0.78-1.85)	EH	651/0/1184	33/0/70
Kumasi	Ghana	rs763737	153278307	IRAK1	cerebral malaria and severe malaria1 anaemia	dom	M	0.057243	0.31732	0.856842	1.06(0.57-1.97)	EH	366/0/546	18/0/31
Madang	PapuaNewGuinea	rs763737	153278307	IRAK1	cerebral malaria and severe malaria1 anaemia	dom	M	-16.09	7604.24	0.998312	0(0-Inf)	E	127/0/2	4/0/0
Moshi	Tanzania	rs763737	153278307	IRAK1	cerebral malaria and severe malaria1 anaemia	dom	M	1.97275	1.07173	0.0656639	7.19(0.88-58.75)	EH	74/0/131	1/0/12
Noguchi	Ghana	rs763737	153278307	IRAK1	cerebral malaria and severe malaria1 anaemia	dom	M	18.3366	2587.19	0.994345	91932761.46(0-Inf)	EH	39/0/58	0/0/6
Ougadougou	BurkinaFaso	rs763737	153278307	IRAK1	cerebral malaria and severe malaria1 anaemia	dom	M	-0.911836	0.636768	0.15215	0.4(0.12-1.4)	H	149/0/216	7/0/4
All	All	rs763737	153278307	IRAK1	cerebral malaria and severe malaria1 anaemia	dom	M	0.0854131	0.115072	0.457932	1.09(0.87-1.36)	EH	2845/0/3927	145/0/222
Bamako	Mali	rs763737	153278307	IRAK1	other severe malaria	add	All	0.237762	0.134848	0.0778693	1.27(0.97-1.65)	SEH	114/70/129	26/26/50
Banjul	Gambia	rs763737	153278307	IRAK1	other severe malaria	add	All	0.0226641	0.0421884	0.591123	1.02(0.94-1.11)	SEH	1375/786/979	473/237/351
Blantyre	Malawi	rs763737	153278307	IRAK1	other severe malaria	add	All	0.146097	0.0875634	0.0952233	1.16(0.97-1.37)	SH	598/523/1403	38/51/128
Buea	Cameroon	rs763737	153278307	IRAK1	other severe malaria	add	All	0.183591	0.0727774	0.011648	1.2(1.04-1.39)	SEH	240/68/239	155/99/218
Ho_Chi_Minh_City	VietNam	rs763737	153278307	IRAK1	other severe malaria	add	All	0.0276833	0.0629767	0.660241	1.03(0.91-1.16)	SE	1784/356/325	403/44/95
Ibadan	Nigeria	rs763737	153278307	IRAK1	other severe malaria	add	All	0.0277004	0.252731	0.912723	1.03(0.63-1.69)	SEH	7/14/17	1934-10-19
Kilifi	Kenya	rs763737	153278307	IRAK1	other severe malaria	add	All	-0.032976	0.0449831	0.463512	0.97(0.89-1.06)	SEH	920/861/1941	254/173/500
Kumasi	Ghana	rs763737	153278307	IRAK1	other severe malaria	add	All	-0.0328362	0.0564471	0.560758	0.97(0.87-1.08)	SEH	537/422/897	190/123/301
Madang	PapuaNewGuinea	rs763737	153278307	IRAK1	other severe malaria	add	All	-0.28371	0.434298	0.513587	0.75(0.32-1.76)	SE	232/8/2	208/5/1
Moshi	Tanzania	rs763737	153278307	IRAK1	other severe malaria	add	All	0.00783596	0.110612	0.943524	1.01(0.81-1.25)	SEH	99/106/249	42/35/107
Noguchi	Ghana	rs763737	153278307	IRAK1	other severe malaria	add	All	0.0873445	0.108613	0.421293	1.09(0.88-1.35)	SEH	51/42/89	105/84/189
Ougadougou	BurkinaFaso	rs763737	153278307	IRAK1	other severe malaria	add	All	-0.0192922	0.06228	0.75674	0.98(0.87-1.11)	SH	211/145/355	207/132/334
All	All	rs763737	153278307	IRAK1	other severe malaria	add	All	0.0259102	0.0202955	0.201726	1.03(0.99-1.07)	SEH	6168/3401/6625	2120/1019/2308
Bamako	Mali	rs763737	153278307	IRAK1	other severe malaria	rec	All	0.239435	0.236864	0.312086	1.27(0.8-2.02)	SEH	114/70/129	26/26/50
Banjul	Gambia	rs763737	153278307	IRAK1	other severe malaria	rec	All	0.0768391	0.0804779	0.339687	1.08(0.92-1.26)	SEH	1375/786/979	473/237/351
Blantyre	Malawi	rs763737	153278307	IRAK1	other severe malaria	rec	All	0.154676	0.147476	0.294262	1.17(0.87-1.56)	SH	598/523/1403	38/51/128
Buea	Cameroon	rs763737	153278307	IRAK1	other severe malaria	rec	All	0.316687	0.137884	0.021632	1.37(1.05-1.8)	SEH	240/68/239	155/99/218
Ho_Chi_Minh_City	VietNam	rs763737	153278307	IRAK1	other severe malaria	rec	All	0.0543286	0.130784	0.677844	1.06(0.82-1.36)	SE	1784/356/325	403/44/95
Ibadan	Nigeria	rs763737	153278307	IRAK1	other severe malaria	rec	All	0.358665	0.437732	0.412575	1.43(0.61-3.38)	SEH	7/14/17	1934-10-19
Kilifi	Kenya	rs763737	153278307	IRAK1	other severe malaria	rec	All	0.0136495	0.0778261	0.860778	1.01(0.87-1.18)	SEH	920/861/1941	254/173/500
Kumasi	Ghana	rs763737	153278307	IRAK1	other severe malaria	rec	All	-0.0471889	0.100159	0.637541	0.95(0.78-1.16)	SEH	537/422/897	190/123/301
Madang	PapuaNewGuinea	rs763737	153278307	IRAK1	other severe malaria	rec	All	-0.66312	1.23247	0.590548	0.52(0.05-5.77)	SE	232/8/2	208/5/1
Moshi	Tanzania	rs763737	153278307	IRAK1	other severe malaria	rec	All	0.0446223	0.185933	0.810337	1.05(0.73-1.51)	SEH	99/106/249	42/35/107
Noguchi	Ghana	rs763737	153278307	IRAK1	other severe malaria	rec	All	0.157564	0.188717	0.403762	1.17(0.81-1.69)	SEH	51/42/89	105/84/189
Ougadougou	BurkinaFaso	rs763737	153278307	IRAK1	other severe malaria	rec	All	-0.0744885	0.111214	0.502998	0.93(0.75-1.15)	SH	211/145/355	207/132/334
All	All	rs763737	153278307	IRAK1	other severe malaria	rec	All	0.0505453	0.0370319	0.17228	1.05(0.98-1.13)	SEH	6168/3401/6625	2120/1019/2308
Bamako	Mali	rs763737	153278307	IRAK1	other severe malaria	dom	All	0.632487	0.282469	0.0251469	1.88(1.08-3.27)	SEH	114/70/129	26/26/50
Banjul	Gambia	rs763737	153278307	IRAK1	other severe malaria	dom	All	0.00642064	0.0758029	0.932499	1.01(0.87-1.17)	SEH	1375/786/979	473/237/351
Blantyre	Malawi	rs763737	153278307	IRAK1	other severe malaria	dom	All	0.389936	0.185844	0.0358887	1.48(1.03-2.13)	SH	598/523/1403	38/51/128
Buea	Cameroon	rs763737	153278307	IRAK1	other severe malaria	dom	All	0.345919	0.138411	0.0124468	1.41(1.08-1.85)	SEH	240/68/239	155/99/218
Ho_Chi_Minh_City	VietNam	rs763737	153278307	IRAK1	other severe malaria	dom	All	0.0469638	0.1112	0.67278	1.05(0.84-1.3)	SE	1784/356/325	403/44/95
Ibadan	Nigeria	rs763737	153278307	IRAK1	other severe malaria	dom	All	-0.414859	0.523447	0.428039	0.66(0.24-1.84)	SEH	7/14/17	1934-10-19
Kilifi	Kenya	rs763737	153278307	IRAK1	other severe malaria	dom	All	-0.14776	0.0879502	0.0929498	0.86(0.73-1.02)	SEH	920/861/1941	254/173/500
Kumasi	Ghana	rs763737	153278307	IRAK1	other severe malaria	dom	All	-0.0681232	0.109854	0.535176	0.93(0.75-1.16)	SEH	537/422/897	190/123/301
Madang	PapuaNewGuinea	rs763737	153278307	IRAK1	other severe malaria	dom	All	-0.322529	0.55577	0.561693	0.72(0.24-2.15)	SE	232/8/2	208/5/1
Moshi	Tanzania	rs763737	153278307	IRAK1	other severe malaria	dom	All	-0.0338414	0.224875	0.880378	0.97(0.62-1.5)	SEH	99/106/249	42/35/107
Noguchi	Ghana	rs763737	153278307	IRAK1	other severe malaria	dom	All	0.141006	0.217445	0.516684	1.15(0.75-1.76)	SEH	51/42/89	105/84/189
Ougadougou	BurkinaFaso	rs763737	153278307	IRAK1	other severe malaria	dom	All	0.0159295	0.122419	0.89647	1.02(0.8-1.29)	SH	211/145/355	207/132/334
All	All	rs763737	153278307	IRAK1	other severe malaria	dom	All	0.0384263	0.038225	0.314769	1.04(0.96-1.12)	SEH	6168/3401/6625	2120/1019/2308
Bamako	Mali	rs763737	153278307	IRAK1	other severe malaria	add	F	-0.107859	0.258548	0.676552	0.9(0.54-1.49)	EH	28/70/53	7/26/10
Banjul	Gambia	rs763737	153278307	IRAK1	other severe malaria	add	F	-0.069143	0.0755647	0.360182	0.93(0.8-1.08)	EH	498/786/301	176/237/89
Blantyre	Malawi	rs763737	153278307	IRAK1	other severe malaria	add	F	0.223611	0.154981	0.149069	1.25(0.92-1.69)	H	162/523/516	6/51/48
Buea	Cameroon	rs763737	153278307	IRAK1	other severe malaria	add	F	0.0705918	0.152972	0.644463	1.07(0.8-1.45)	EH	40/68/42	52/99/62
Ho_Chi_Minh_City	VietNam	rs763737	153278307	IRAK1	other severe malaria	add	F	-0.0999222	0.165715	0.546526	0.9(0.65-1.25)	E	736/356/44	92/44/3
Ibadan	Nigeria	rs763737	153278307	IRAK1	other severe malaria	add	F	0.438494	0.52107	0.400054	1.55(0.56-4.3)	EH	1/14/5	2011-10-03
Kilifi	Kenya	rs763737	153278307	IRAK1	other severe malaria	add	F	0.0133431	0.0775583	0.863406	1.01(0.87-1.18)	EH	269/861/757	72/173/198
Kumasi	Ghana	rs763737	153278307	IRAK1	other severe malaria	add	F	0.00361686	0.098269	0.97064	1(0.83-1.22)	EH	171/422/351	53/123/113
Madang	PapuaNewGuinea	rs763737	153278307	IRAK1	other severe malaria	add	F	-0.228146	0.592908	0.700393	0.8(0.25-2.54)	E	105/8/0	80/5/0
Moshi	Tanzania	rs763737	153278307	IRAK1	other severe malaria	add	F	0.0271295	0.188624	0.885636	1.03(0.71-1.49)	EH	25/106/118	11/35/49
Noguchi	Ghana	rs763737	153278307	IRAK1	other severe malaria	add	F	0.257909	0.207642	0.214206	1.29(0.86-1.94)	EH	12/42/31	20/84/69
Ougadougou	BurkinaFaso	rs763737	153278307	IRAK1	other severe malaria	add	F	-0.0945071	0.112275	0.399928	0.91(0.73-1.13)	H	62/145/139	50/132/104
All	All	rs763737	153278307	IRAK1	other severe malaria	add	F	-0.00503158	0.0371104	0.89215	0.99(0.93-1.07)	EH	2109/3401/2357	622/1019/756
Bamako	Mali	rs763737	153278307	IRAK1	other severe malaria	rec	F	-0.517145	0.412829	0.21032	0.6(0.27-1.34)	EH	28/70/53	7/26/10
Banjul	Gambia	rs763737	153278307	IRAK1	other severe malaria	rec	F	-0.0180262	0.136714	0.8951	0.98(0.75-1.28)	EH	498/786/301	176/237/89
Blantyre	Malawi	rs763737	153278307	IRAK1	other severe malaria	rec	F	0.102017	0.20483	0.618443	1.11(0.74-1.65)	H	162/523/516	6/51/48
Buea	Cameroon	rs763737	153278307	IRAK1	other severe malaria	rec	F	0.0496325	0.24607	0.840151	1.05(0.65-1.7)	EH	40/68/42	52/99/62
Ho_Chi_Minh_City	VietNam	rs763737	153278307	IRAK1	other severe malaria	rec	F	-0.616969	0.6064	0.30895	0.54(0.16-1.77)	E	736/356/44	92/44/3
Ibadan	Nigeria	rs763737	153278307	IRAK1	other severe malaria	rec	F	1.02606	0.673851	0.127838	2.79(0.74-10.45)	EH	1/14/5	2011-10-03
Kilifi	Kenya	rs763737	153278307	IRAK1	other severe malaria	rec	F	0.138313	0.108694	0.203197	1.15(0.93-1.42)	EH	269/861/757	72/173/198
Kumasi	Ghana	rs763737	153278307	IRAK1	other severe malaria	rec	F	0.00959006	0.145505	0.947451	1.01(0.76-1.34)	EH	171/422/351	53/123/113
Madang	PapuaNewGuinea	rs763737	153278307	IRAK1	other severe malaria	rec	F	NA	NA	NA	NA(NA-NA)	E	105/8/0	80/5/0
Moshi	Tanzania	rs763737	153278307	IRAK1	other severe malaria	rec	F	0.0963984	0.252625	0.702768	1.1(0.67-1.81)	EH	25/106/118	11/35/49
Noguchi	Ghana	rs763737	153278307	IRAK1	other severe malaria	rec	F	0.311852	0.288	0.278888	1.37(0.78-2.4)	EH	12/42/31	20/84/69
Ougadougou	BurkinaFaso	rs763737	153278307	IRAK1	other severe malaria	rec	F	-0.200469	0.166304	0.228035	0.82(0.59-1.13)	H	62/145/139	50/132/104
All	All	rs763737	153278307	IRAK1	other severe malaria	rec	F	0.0304738	0.0573115	0.594918	1.03(0.92-1.15)	EH	2109/3401/2357	622/1019/756
Bamako	Mali	rs763737	153278307	IRAK1	other severe malaria	dom	F	0.359512	0.484047	0.457651	1.43(0.55-3.7)	EH	28/70/53	7/26/10
Banjul	Gambia	rs763737	153278307	IRAK1	other severe malaria	dom	F	-0.13856	0.110793	0.211073	0.87(0.7-1.08)	EH	498/786/301	176/237/89
Blantyre	Malawi	rs763737	153278307	IRAK1	other severe malaria	dom	F	0.924958	0.429421	0.0312429	2.52(1.09-5.85)	H	162/523/516	6/51/48
Buea	Cameroon	rs763737	153278307	IRAK1	other severe malaria	dom	F	0.146643	0.257755	0.569408	1.16(0.7-1.92)	EH	40/68/42	52/99/62
Ho_Chi_Minh_City	VietNam	rs763737	153278307	IRAK1	other severe malaria	dom	F	-0.0566234	0.190505	0.766293	0.94(0.65-1.37)	E	736/356/44	92/44/3
Ibadan	Nigeria	rs763737	153278307	IRAK1	other severe malaria	dom	F	-0.986225	1.23306	0.423815	0.37(0.03-4.18)	EH	1/14/5	2011-10-03
Kilifi	Kenya	rs763737	153278307	IRAK1	other severe malaria	dom	F	-0.215165	0.148152	0.146412	0.81(0.6-1.08)	EH	269/861/757	72/173/198
Kumasi	Ghana	rs763737	153278307	IRAK1	other severe malaria	dom	F	-0.00265899	0.184505	0.988502	1(0.69-1.43)	EH	171/422/351	53/123/113
Madang	PapuaNewGuinea	rs763737	153278307	IRAK1	other severe malaria	dom	F	-0.228146	0.592908	0.700393	0.8(0.25-2.54)	E	105/8/0	80/5/0
Moshi	Tanzania	rs763737	153278307	IRAK1	other severe malaria	dom	F	-0.124067	0.404503	0.759059	0.88(0.4-1.95)	EH	25/106/118	11/35/49
Noguchi	Ghana	rs763737	153278307	IRAK1	other severe malaria	dom	F	0.366945	0.405293	0.365264	1.44(0.65-3.19)	EH	12/42/31	20/84/69
Ougadougou	BurkinaFaso	rs763737	153278307	IRAK1	other severe malaria	dom	F	-0.0100894	0.212102	0.96206	0.99(0.65-1.5)	H	62/145/139	50/132/104
All	All	rs763737	153278307	IRAK1	other severe malaria	dom	F	-0.0520017	0.0633238	0.411531	0.95(0.84-1.07)	EH	2109/3401/2357	622/1019/756
Bamako	Mali	rs763737	153278307	IRAK1	other severe malaria	het	F	0.628192	0.36462	0.0849126	1.87(0.92-3.83)	EH	28/70/53	7/26/10
Banjul	Gambia	rs763737	153278307	IRAK1	other severe malaria	het	F	-0.112152	0.104875	0.284895	0.89(0.73-1.1)	EH	498/786/301	176/237/89
Blantyre	Malawi	rs763737	153278307	IRAK1	other severe malaria	het	F	0.20241	0.2042	0.321571	1.22(0.82-1.83)	H	162/523/516	6/51/48
Buea	Cameroon	rs763737	153278307	IRAK1	other severe malaria	het	F	0.0681676	0.222637	0.759466	1.07(0.69-1.66)	EH	40/68/42	52/99/62
Ho_Chi_Minh_City	VietNam	rs763737	153278307	IRAK1	other severe malaria	het	F	0.0222042	0.194125	0.908936	1.02(0.7-1.5)	E	736/356/44	92/44/3
Ibadan	Nigeria	rs763737	153278307	IRAK1	other severe malaria	het	F	-1.22312	0.646987	0.0586925	0.29(0.08-1.05)	EH	1/14/5	2011-10-03
Kilifi	Kenya	rs763737	153278307	IRAK1	other severe malaria	het	F	-0.251223	0.109939	0.0223062	0.78(0.63-0.96)	EH	269/861/757	72/173/198
Kumasi	Ghana	rs763737	153278307	IRAK1	other severe malaria	het	F	-0.010735	0.142237	0.939838	0.99(0.75-1.31)	EH	171/422/351	53/123/113
Madang	PapuaNewGuinea	rs763737	153278307	IRAK1	other severe malaria	het	F	-0.228146	0.592908	0.700393	0.8(0.25-2.54)	E	105/8/0	80/5/0
Moshi	Tanzania	rs763737	153278307	IRAK1	other severe malaria	het	F	-0.151767	0.260086	0.55954	0.86(0.52-1.43)	EH	25/106/118	11/35/49
Noguchi	Ghana	rs763737	153278307	IRAK1	other severe malaria	het	F	-0.127377	0.276231	0.644709	0.88(0.51-1.51)	EH	12/42/31	20/84/69
Ougadougou	BurkinaFaso	rs763737	153278307	IRAK1	other severe malaria	het	F	0.186182	0.162514	0.251943	1.2(0.88-1.66)	H	62/145/139	50/132/104
All	All	rs763737	153278307	IRAK1	other severe malaria	het	F	-0.0591763	0.0517048	0.252415	0.94(0.85-1.04)	EH	2109/3401/2357	622/1019/756
Bamako	Mali	rs763737	153278307	IRAK1	other severe malaria	dom	M	0.754185	0.331749	0.0230047	2.13(1.11-4.07)	EH	86/0/76	19/0/40
Banjul	Gambia	rs763737	153278307	IRAK1	other severe malaria	dom	M	0.127543	0.10147	0.20877	1.14(0.93-1.39)	EH	877/0/678	297/0/262
Blantyre	Malawi	rs763737	153278307	IRAK1	other severe malaria	dom	M	0.213574	0.217588	0.326319	1.24(0.81-1.9)	H	436/0/887	32/0/80
Buea	Cameroon	rs763737	153278307	IRAK1	other severe malaria	dom	M	0.440281	0.166397	0.0081458	1.55(1.12-2.15)	EH	200/0/197	103/0/156
Ho_Chi_Minh_City	VietNam	rs763737	153278307	IRAK1	other severe malaria	dom	M	0.106712	0.136829	0.435452	1.11(0.85-1.45)	E	1048/0/281	311/0/92
Ibadan	Nigeria	rs763737	153278307	IRAK1	other severe malaria	dom	M	-0.1746	0.636691	0.783908	0.84(0.24-2.92)	EH	6/0/12	16/0/23
Kilifi	Kenya	rs763737	153278307	IRAK1	other severe malaria	dom	M	-0.106496	0.108272	0.325315	0.9(0.73-1.11)	EH	651/0/1184	182/0/302
Kumasi	Ghana	rs763737	153278307	IRAK1	other severe malaria	dom	M	-0.11976	0.137242	0.382874	0.89(0.68-1.16)	EH	366/0/546	137/0/188
Madang	PapuaNewGuinea	rs763737	153278307	IRAK1	other severe malaria	dom	M	-0.651036	1.23331	0.597586	0.52(0.05-5.85)	E	127/0/2	128/0/1
Moshi	Tanzania	rs763737	153278307	IRAK1	other severe malaria	dom	M	0.0178692	0.275972	0.948373	1.02(0.59-1.75)	EH	74/0/131	31/0/58
Noguchi	Ghana	rs763737	153278307	IRAK1	other severe malaria	dom	M	0.0381004	0.256245	0.8818	1.04(0.63-1.72)	EH	39/0/58	85/0/120
Ougadougou	BurkinaFaso	rs763737	153278307	IRAK1	other severe malaria	dom	M	0.0307099	0.150318	0.83812	1.03(0.77-1.38)	H	149/0/216	157/0/230
All	All	rs763737	153278307	IRAK1	other severe malaria	dom	M	0.0765614	0.0482066	0.112243	1.08(0.98-1.19)	EH	4059/0/4268	1498/0/1552
Bamako	Mali	rs1734792	153341060	MECP2	severe malaria	add	All	0.112274	0.101009	0.266345	1.12(0.92-1.36)	SEH	230/49/48	286/74/75
Banjul	Gambia	rs1734792	153341060	MECP2	severe malaria	add	All	-0.0367278	0.0428192	0.391035	0.96(0.89-1.05)	SEH	2419/476/326	1903/328/236
Blantyre	Malawi	rs1734792	153341060	MECP2	severe malaria	add	All	0.0647213	0.0434425	0.136272	1.07(0.98-1.16)	SH	1575/495/437	846/260/268
Buea	Cameroon	rs1734792	153341060	MECP2	severe malaria	add	All	0.0714826	0.0815937	0.380986	1.07(0.92-1.26)	SEH	426/55/93	430/88/93
Ho_Chi_Minh_City	VietNam	rs1734792	153341060	MECP2	severe malaria	add	All	0.0292534	0.0532772	0.582951	1.03(0.93-1.14)	SE	382/445/1645	145/81/562
Ibadan	Nigeria	rs1734792	153341060	MECP2	severe malaria	add	All	-0.0644251	0.26256	0.806168	0.94(0.56-1.57)	SEH	2005-12-22	53/11/13
Kilifi	Kenya	rs1734792	153341060	MECP2	severe malaria	add	All	0.0259079	0.0348254	0.456914	1.03(0.96-1.1)	SEH	2304/842/726	1326/459/438
Kumasi	Ghana	rs1734792	153341060	MECP2	severe malaria	add	All	-0.0254991	0.0489354	0.602314	0.97(0.89-1.07)	SEH	1294/380/314	986/247/240
Madang	PapuaNewGuinea	rs1734792	153341060	MECP2	severe malaria	add	All	-0.0677352	0.130514	0.603768	0.93(0.72-1.21)	SE	187/27/25	304/37/35
Moshi	Tanzania	rs1734792	153341060	MECP2	severe malaria	add	All	-0.0754237	0.0900543	0.402291	0.93(0.78-1.11)	SEH	257/112/85	272/68/86
Noguchi	Ghana	rs1734792	153341060	MECP2	severe malaria	add	All	0.0777191	0.106228	0.464397	1.08(0.88-1.33)	SEH	118/39/29	409/112/123
Ougadougou	BurkinaFaso	rs1734792	153341060	MECP2	severe malaria	add	All	-0.0015949	0.0703208	0.981905	1(0.87-1.15)	SH	479/133/99	577/127/132
All	All	rs1734792	153341060	MECP2	severe malaria	add	All	0.0141577	0.0171679	0.409564	1.01(0.98-1.05)	SEH	9693/3065/3832	7537/1892/2301
Bamako	Mali	rs1734792	153341060	MECP2	severe malaria	rec	All	0.103521	0.214806	0.629859	1.11(0.73-1.69)	SEH	230/49/48	286/74/75
Banjul	Gambia	rs1734792	153341060	MECP2	severe malaria	rec	All	-0.0501614	0.0955476	0.599591	0.95(0.79-1.15)	SEH	2419/476/326	1903/328/236
Blantyre	Malawi	rs1734792	153341060	MECP2	severe malaria	rec	All	0.196067	0.0908546	0.0309257	1.22(1.02-1.45)	SH	1575/495/437	846/260/268
Buea	Cameroon	rs1734792	153341060	MECP2	severe malaria	rec	All	0.237116	0.172666	0.16967	1.27(0.9-1.78)	SEH	426/55/93	430/88/93
Ho_Chi_Minh_City	VietNam	rs1734792	153341060	MECP2	severe malaria	rec	All	0.0431938	0.092887	0.641921	1.04(0.87-1.25)	SE	382/445/1645	145/81/562
Ibadan	Nigeria	rs1734792	153341060	MECP2	severe malaria	rec	All	0.239119	0.579927	0.6801	1.27(0.41-3.96)	SEH	2005-12-22	53/11/13
Kilifi	Kenya	rs1734792	153341060	MECP2	severe malaria	rec	All	0.0694529	0.072667	0.339189	1.07(0.93-1.24)	SEH	2304/842/726	1326/459/438
Kumasi	Ghana	rs1734792	153341060	MECP2	severe malaria	rec	All	0.00176175	0.102855	0.986334	1(0.82-1.23)	SEH	1294/380/314	986/247/240
Madang	PapuaNewGuinea	rs1734792	153341060	MECP2	severe malaria	rec	All	-0.126559	0.282027	0.653613	0.88(0.51-1.53)	SE	187/27/25	304/37/35
Moshi	Tanzania	rs1734792	153341060	MECP2	severe malaria	rec	All	0.0348171	0.186924	0.852238	1.04(0.72-1.49)	SEH	257/112/85	272/68/86
Noguchi	Ghana	rs1734792	153341060	MECP2	severe malaria	rec	All	0.275783	0.231248	0.233032	1.32(0.84-2.07)	SEH	118/39/29	409/112/123
Ougadougou	BurkinaFaso	rs1734792	153341060	MECP2	severe malaria	rec	All	0.0820393	0.153655	0.593398	1.09(0.8-1.47)	SH	479/133/99	577/127/132
All	All	rs1734792	153341060	MECP2	severe malaria	rec	All	0.071857	0.0351974	0.0411969	1.07(1-1.15)	SEH	9693/3065/3832	7537/1892/2301
Bamako	Mali	rs1734792	153341060	MECP2	severe malaria	dom	All	0.237244	0.163402	0.146528	1.27(0.92-1.75)	SEH	230/49/48	286/74/75
Banjul	Gambia	rs1734792	153341060	MECP2	severe malaria	dom	All	-0.0637684	0.066275	0.335959	0.94(0.82-1.07)	SEH	2419/476/326	1903/328/236
Blantyre	Malawi	rs1734792	153341060	MECP2	severe malaria	dom	All	0.0550399	0.071459	0.441164	1.06(0.92-1.22)	SH	1575/495/437	846/260/268
Buea	Cameroon	rs1734792	153341060	MECP2	severe malaria	dom	All	0.0533674	0.140005	0.703069	1.05(0.8-1.39)	SEH	426/55/93	430/88/93
Ho_Chi_Minh_City	VietNam	rs1734792	153341060	MECP2	severe malaria	dom	All	0.0655496	0.1112	0.555544	1.07(0.86-1.33)	SE	382/445/1645	145/81/562
Ibadan	Nigeria	rs1734792	153341060	MECP2	severe malaria	dom	All	-0.307121	0.431266	0.476379	0.74(0.32-1.71)	SEH	2005-12-22	53/11/13
Kilifi	Kenya	rs1734792	153341060	MECP2	severe malaria	dom	All	0.0271403	0.0574085	0.636386	1.03(0.92-1.15)	SEH	2304/842/726	1326/459/438
Kumasi	Ghana	rs1734792	153341060	MECP2	severe malaria	dom	All	-0.069138	0.0798537	0.386596	0.93(0.8-1.09)	SEH	1294/380/314	986/247/240
Madang	PapuaNewGuinea	rs1734792	153341060	MECP2	severe malaria	dom	All	-0.104925	0.209979	0.61729	0.9(0.6-1.36)	SE	187/27/25	304/37/35
Moshi	Tanzania	rs1734792	153341060	MECP2	severe malaria	dom	All	-0.231317	0.148566	0.119471	0.79(0.59-1.06)	SEH	257/112/85	272/68/86
Noguchi	Ghana	rs1734792	153341060	MECP2	severe malaria	dom	All	0.0449692	0.175784	0.798089	1.05(0.74-1.48)	SEH	118/39/29	409/112/123
Ougadougou	BurkinaFaso	rs1734792	153341060	MECP2	severe malaria	dom	All	-0.0493224	0.113034	0.662583	0.95(0.76-1.19)	SH	479/133/99	577/127/132
All	All	rs1734792	153341060	MECP2	severe malaria	dom	All	-0.00762802	0.0285032	0.788992	0.99(0.94-1.05)	SEH	9693/3065/3832	7537/1892/2301
Bamako	Mali	rs1734792	153341060	MECP2	severe malaria	add	F	0.246426	0.192959	0.201569	1.28(0.88-1.87)	EH	104/49/7	108/74/9
Banjul	Gambia	rs1734792	153341060	MECP2	severe malaria	add	F	-0.029825	0.0750413	0.691037	0.97(0.84-1.12)	EH	1090/476/42	819/328/34
Blantyre	Malawi	rs1734792	153341060	MECP2	severe malaria	add	F	0.0509311	0.0778448	0.512941	1.05(0.9-1.23)	H	620/495/77	354/260/58
Buea	Cameroon	rs1734792	153341060	MECP2	severe malaria	add	F	-0.172538	0.178819	0.334608	0.84(0.59-1.19)	EH	97/55/7	179/88/13
Ho_Chi_Minh_City	VietNam	rs1734792	153341060	MECP2	severe malaria	add	F	0.119539	0.133337	0.369974	1.13(0.87-1.46)	E	54/445/651	6/81/121
Ibadan	Nigeria	rs1734792	153341060	MECP2	severe malaria	add	F	-0.406165	0.436487	0.352096	0.67(0.28-1.57)	EH	2002-12-08	2003-11-17
Kilifi	Kenya	rs1734792	153341060	MECP2	severe malaria	add	F	-0.0104216	0.0623144	0.867179	0.99(0.88-1.12)	EH	928/842/155	532/459/87
Kumasi	Ghana	rs1734792	153341060	MECP2	severe malaria	add	F	-0.155197	0.0861002	0.0714652	0.86(0.72-1.01)	EH	526/380/75	395/247/41
Madang	PapuaNewGuinea	rs1734792	153341060	MECP2	severe malaria	add	F	0.0448847	0.219289	0.83782	1.05(0.68-1.61)	E	80/27/5	122/37/9
Moshi	Tanzania	rs1734792	153341060	MECP2	severe malaria	add	F	-0.193476	0.151166	0.200585	0.82(0.61-1.11)	EH	114/112/23	110/68/22
Noguchi	Ghana	rs1734792	153341060	MECP2	severe malaria	add	F	-0.0162346	0.20606	0.937203	0.98(0.66-1.47)	EH	40/39/5	153/112/20
Ougadougou	BurkinaFaso	rs1734792	153341060	MECP2	severe malaria	add	F	-0.185794	0.133632	0.164427	0.83(0.64-1.08)	H	196/133/15	221/127/13
All	All	rs1734792	153341060	MECP2	severe malaria	add	F	-0.0333057	0.0315313	0.290843	0.97(0.91-1.03)	EH	3857/3065/1064	3016/1892/430
Bamako	Mali	rs1734792	153341060	MECP2	severe malaria	rec	F	0.0257168	0.525382	0.96096	1.03(0.37-2.87)	EH	104/49/7	108/74/9
Banjul	Gambia	rs1734792	153341060	MECP2	severe malaria	rec	F	0.119342	0.24072	0.620057	1.13(0.7-1.81)	EH	1090/476/42	819/328/34
Blantyre	Malawi	rs1734792	153341060	MECP2	severe malaria	rec	F	0.36873	0.184807	0.0460194	1.45(1.01-2.08)	H	620/495/77	354/260/58
Buea	Cameroon	rs1734792	153341060	MECP2	severe malaria	rec	F	0.0299489	0.506778	0.952875	1.03(0.38-2.78)	EH	97/55/7	179/88/13
Ho_Chi_Minh_City	VietNam	rs1734792	153341060	MECP2	severe malaria	rec	F	0.0891465	0.15388	0.56237	1.09(0.81-1.48)	E	54/445/651	6/81/121
Ibadan	Nigeria	rs1734792	153341060	MECP2	severe malaria	rec	F	0.133531	0.971315	0.890655	1.14(0.17-7.67)	EH	2002-12-08	2003-11-17
Kilifi	Kenya	rs1734792	153341060	MECP2	severe malaria	rec	F	0.0191419	0.144958	0.894944	1.02(0.77-1.35)	EH	928/842/155	532/459/87
Kumasi	Ghana	rs1734792	153341060	MECP2	severe malaria	rec	F	-0.224045	0.212446	0.291611	0.8(0.53-1.21)	EH	526/380/75	395/247/41
Madang	PapuaNewGuinea	rs1734792	153341060	MECP2	severe malaria	rec	F	0.281824	0.574549	0.623771	1.33(0.43-4.09)	E	80/27/5	122/37/9
Moshi	Tanzania	rs1734792	153341060	MECP2	severe malaria	rec	F	0.130556	0.325763	0.68859	1.14(0.6-2.16)	EH	114/112/23	110/68/22
Noguchi	Ghana	rs1734792	153341060	MECP2	severe malaria	rec	F	0.446633	0.547808	0.414896	1.56(0.53-4.57)	EH	40/39/5	153/112/20
Ougadougou	BurkinaFaso	rs1734792	153341060	MECP2	severe malaria	rec	F	-0.23168	0.38939	0.551855	0.79(0.37-1.7)	H	196/133/15	221/127/13
All	All	rs1734792	153341060	MECP2	severe malaria	rec	F	0.0795568	0.0722769	0.271018	1.08(0.94-1.25)	EH	3857/3065/1064	3016/1892/430
Bamako	Mali	rs1734792	153341060	MECP2	severe malaria	dom	F	0.34411	0.228961	0.13286	1.41(0.9-2.21)	EH	104/49/7	108/74/9
Banjul	Gambia	rs1734792	153341060	MECP2	severe malaria	dom	F	-0.0537569	0.0855567	0.529795	0.95(0.8-1.12)	EH	1090/476/42	819/328/34
Blantyre	Malawi	rs1734792	153341060	MECP2	severe malaria	dom	F	-0.0205774	0.0974818	0.832817	0.98(0.81-1.19)	H	620/495/77	354/260/58
Buea	Cameroon	rs1734792	153341060	MECP2	severe malaria	dom	F	-0.251174	0.213831	0.240139	0.78(0.51-1.18)	EH	97/55/7	179/88/13
Ho_Chi_Minh_City	VietNam	rs1734792	153341060	MECP2	severe malaria	dom	F	0.494291	0.438439	0.259579	1.64(0.69-3.87)	E	54/445/651	6/81/121
Ibadan	Nigeria	rs1734792	153341060	MECP2	severe malaria	dom	F	-0.740674	0.574293	0.19715	0.48(0.15-1.47)	EH	2002-12-08	2003-11-17
Kilifi	Kenya	rs1734792	153341060	MECP2	severe malaria	dom	F	-0.0224081	0.0789529	0.776551	0.98(0.84-1.14)	EH	928/842/155	532/459/87
Kumasi	Ghana	rs1734792	153341060	MECP2	severe malaria	dom	F	-0.185048	0.107434	0.0849915	0.83(0.67-1.03)	EH	526/380/75	395/247/41
Madang	PapuaNewGuinea	rs1734792	153341060	MECP2	severe malaria	dom	F	0.00432073	0.276797	0.987546	1(0.58-1.73)	E	80/27/5	122/37/9
Moshi	Tanzania	rs1734792	153341060	MECP2	severe malaria	dom	F	-0.397208	0.202325	0.0496212	0.67(0.45-1)	EH	114/112/23	110/68/22
Noguchi	Ghana	rs1734792	153341060	MECP2	severe malaria	dom	F	-0.134633	0.257336	0.60085	0.87(0.53-1.45)	EH	40/39/5	153/112/20
Ougadougou	BurkinaFaso	rs1734792	153341060	MECP2	severe malaria	dom	F	-0.214558	0.15534	0.167213	0.81(0.6-1.09)	H	196/133/15	221/127/13
All	All	rs1734792	153341060	MECP2	severe malaria	dom	F	-0.0764737	0.0396241	0.0536094	0.93(0.86-1)	EH	3857/3065/1064	3016/1892/430
Bamako	Mali	rs1734792	153341060	MECP2	severe malaria	het	F	0.357247	0.235317	0.128976	1.43(0.9-2.27)	EH	104/49/7	108/74/9
Banjul	Gambia	rs1734792	153341060	MECP2	severe malaria	het	F	-0.0724484	0.0878651	0.409632	0.93(0.78-1.1)	EH	1090/476/42	819/328/34
Blantyre	Malawi	rs1734792	153341060	MECP2	severe malaria	het	F	-0.125405	0.0995011	0.207549	0.88(0.73-1.07)	H	620/495/77	354/260/58
Buea	Cameroon	rs1734792	153341060	MECP2	severe malaria	het	F	-0.271271	0.219535	0.216585	0.76(0.5-1.17)	EH	97/55/7	179/88/13
Ho_Chi_Minh_City	VietNam	rs1734792	153341060	MECP2	severe malaria	het	F	-0.0171008	0.155636	0.912507	0.98(0.72-1.33)	E	54/445/651	6/81/121
Ibadan	Nigeria	rs1734792	153341060	MECP2	severe malaria	het	F	-0.786763	0.572206	0.169143	0.46(0.15-1.4)	EH	2002-12-08	2003-11-17
Kilifi	Kenya	rs1734792	153341060	MECP2	severe malaria	het	F	-0.0285436	0.079627	0.719995	0.97(0.83-1.14)	EH	928/842/155	532/459/87
Kumasi	Ghana	rs1734792	153341060	MECP2	severe malaria	het	F	-0.13283	0.110173	0.227952	0.88(0.71-1.09)	EH	526/380/75	395/247/41
Madang	PapuaNewGuinea	rs1734792	153341060	MECP2	severe malaria	het	F	-0.0709018	0.292928	0.808745	0.93(0.52-1.65)	E	80/27/5	122/37/9
Moshi	Tanzania	rs1734792	153341060	MECP2	severe malaria	het	F	-0.465107	0.206909	0.024584	0.63(0.42-0.94)	EH	114/112/23	110/68/22
Noguchi	Ghana	rs1734792	153341060	MECP2	severe malaria	het	F	-0.247065	0.258216	0.338659	0.78(0.47-1.3)	EH	40/39/5	153/112/20
Ougadougou	BurkinaFaso	rs1734792	153341060	MECP2	severe malaria	het	F	-0.184128	0.158086	0.244127	0.83(0.61-1.13)	H	196/133/15	221/127/13
All	All	rs1734792	153341060	MECP2	severe malaria	het	F	-0.0988471	0.0393703	0.012049	0.91(0.84-0.98)	EH	3857/3065/1064	3016/1892/430
Bamako	Mali	rs1734792	153341060	MECP2	severe malaria	dom	M	0.143155	0.236681	0.545283	1.15(0.73-1.83)	EH	126/0/41	178/0/66
Banjul	Gambia	rs1734792	153341060	MECP2	severe malaria	dom	M	-0.0801252	0.104865	0.444822	0.92(0.75-1.13)	EH	1329/0/284	1084/0/202
Blantyre	Malawi	rs1734792	153341060	MECP2	severe malaria	dom	M	0.141814	0.104172	0.173403	1.15(0.94-1.41)	H	955/0/360	492/0/210
Buea	Cameroon	rs1734792	153341060	MECP2	severe malaria	dom	M	0.283155	0.184139	0.124117	1.33(0.93-1.9)	EH	329/0/86	251/0/80
Ho_Chi_Minh_City	VietNam	rs1734792	153341060	MECP2	severe malaria	dom	M	0.0231889	0.116843	0.842684	1.02(0.81-1.29)	E	328/0/994	139/0/441
Ibadan	Nigeria	rs1734792	153341060	MECP2	severe malaria	dom	M	0.544513	0.7809	0.485622	1.72(0.37-7.96)	EH	14/0/3	36/0/10
Kilifi	Kenya	rs1734792	153341060	MECP2	severe malaria	dom	M	0.0842318	0.0839633	0.315765	1.09(0.92-1.28)	EH	1376/0/571	794/0/351
Kumasi	Ghana	rs1734792	153341060	MECP2	severe malaria	dom	M	0.0744542	0.118286	0.52906	1.08(0.85-1.36)	EH	768/0/239	591/0/199
Madang	PapuaNewGuinea	rs1734792	153341060	MECP2	severe malaria	dom	M	-0.280458	0.332291	0.398662	0.76(0.39-1.45)	E	107/0/20	182/0/26
Moshi	Tanzania	rs1734792	153341060	MECP2	severe malaria	dom	M	0.00466639	0.225885	0.983518	1(0.65-1.56)	EH	143/0/62	162/0/64
Noguchi	Ghana	rs1734792	153341060	MECP2	severe malaria	dom	M	0.24738	0.264686	0.349986	1.28(0.76-2.15)	EH	78/0/24	256/0/103
Ougadougou	BurkinaFaso	rs1734792	153341060	MECP2	severe malaria	dom	M	0.139783	0.166292	0.400581	1.15(0.83-1.59)	H	283/0/84	356/0/119
All	All	rs1734792	153341060	MECP2	severe malaria	dom	M	0.0733154	0.0408502	0.0726955	1.08(0.99-1.17)	EH	5836/0/2768	4521/0/1871
Bamako	Mali	rs1734792	153341060	MECP2	cerebral malaria	add	All	0.056893	0.170899	0.739206	1.06(0.76-1.48)	SEH	230/49/48	53/13/12
Banjul	Gambia	rs1734792	153341060	MECP2	cerebral malaria	add	All	-0.0624688	0.0640316	0.329266	0.94(0.83-1.07)	SEH	2419/476/326	624/103/74
Blantyre	Malawi	rs1734792	153341060	MECP2	cerebral malaria	add	All	-0.00467289	0.0520599	0.928478	1(0.9-1.1)	SH	1575/495/437	552/167/150
Buea	Cameroon	rs1734792	153341060	MECP2	cerebral malaria	add	All	0.119797	0.240837	0.618894	1.13(0.7-1.81)	SEH	426/55/93	2007-05-27
Ho_Chi_Minh_City	VietNam	rs1734792	153341060	MECP2	cerebral malaria	add	All	0.0460939	0.092315	0.61756	1.05(0.87-1.25)	SE	382/445/1645	38/18/152
Ibadan	Nigeria	rs1734792	153341060	MECP2	cerebral malaria	add	All	-0.245657	0.803861	0.759912	0.78(0.16-3.78)	SEH	2005-12-22	5/0/1
Kilifi	Kenya	rs1734792	153341060	MECP2	cerebral malaria	add	All	0.0163857	0.0485024	0.735489	1.02(0.92-1.12)	SEH	2304/842/726	534/188/170
Kumasi	Ghana	rs1734792	153341060	MECP2	cerebral malaria	add	All	-0.208923	0.112017	0.0621672	0.81(0.65-1.01)	SEH	1294/380/314	166/34/27
Madang	PapuaNewGuinea	rs1734792	153341060	MECP2	cerebral malaria	add	All	-0.235717	0.305885	0.440941	0.79(0.43-1.44)	SE	187/27/25	37/4/2
Moshi	Tanzania	rs1734792	153341060	MECP2	cerebral malaria	add	All	0.152219	0.233885	0.515158	1.16(0.74-1.84)	SEH	257/112/85	2010-03-21
Noguchi	Ghana	rs1734792	153341060	MECP2	cerebral malaria	add	All	0.0891089	0.325278	0.784125	1.09(0.58-2.07)	SEH	118/39/29	2003-05-13
Ougadougou	BurkinaFaso	rs1734792	153341060	MECP2	cerebral malaria	add	All	0.00809992	0.140495	0.954025	1.01(0.77-1.33)	SH	479/133/99	69/22/14
All	All	rs1734792	153341060	MECP2	cerebral malaria	add	All	-0.0138562	0.0267316	0.604218	0.99(0.94-1.04)	SEH	9693/3065/3832	2139/562/622
Bamako	Mali	rs1734792	153341060	MECP2	cerebral malaria	rec	All	-0.00074938	0.375915	0.998409	1(0.48-2.09)	SEH	230/49/48	53/13/12
Banjul	Gambia	rs1734792	153341060	MECP2	cerebral malaria	rec	All	-0.0607576	0.140841	0.666185	0.94(0.71-1.24)	SEH	2419/476/326	624/103/74
Blantyre	Malawi	rs1734792	153341060	MECP2	cerebral malaria	rec	All	0.0484396	0.109485	0.658176	1.05(0.85-1.3)	SH	1575/495/437	552/167/150
Buea	Cameroon	rs1734792	153341060	MECP2	cerebral malaria	rec	All	0.493204	0.467046	0.290965	1.64(0.66-4.09)	SEH	426/55/93	2007-05-27
Ho_Chi_Minh_City	VietNam	rs1734792	153341060	MECP2	cerebral malaria	rec	All	0.0689912	0.165488	0.676755	1.07(0.77-1.48)	SE	382/445/1645	38/18/152
Ibadan	Nigeria	rs1734792	153341060	MECP2	cerebral malaria	rec	All	0.334158	1.36356	0.806408	1.4(0.1-20.22)	SEH	2005-12-22	5/0/1
Kilifi	Kenya	rs1734792	153341060	MECP2	cerebral malaria	rec	All	0.0370755	0.101705	0.715454	1.04(0.85-1.27)	SEH	2304/842/726	534/188/170
Kumasi	Ghana	rs1734792	153341060	MECP2	cerebral malaria	rec	All	-0.279619	0.230272	0.224632	0.76(0.48-1.19)	SEH	1294/380/314	166/34/27
Madang	PapuaNewGuinea	rs1734792	153341060	MECP2	cerebral malaria	rec	All	-0.685457	0.78754	0.384094	0.5(0.11-2.36)	SE	187/27/25	37/4/2
Moshi	Tanzania	rs1734792	153341060	MECP2	cerebral malaria	rec	All	0.717794	0.419199	0.0868415	2.05(0.9-4.66)	SEH	257/112/85	2010-03-21
Noguchi	Ghana	rs1734792	153341060	MECP2	cerebral malaria	rec	All	0.203092	0.710499	0.774998	1.23(0.3-4.93)	SEH	118/39/29	2003-05-13
Ougadougou	BurkinaFaso	rs1734792	153341060	MECP2	cerebral malaria	rec	All	-0.11672	0.318472	0.713992	0.89(0.48-1.66)	SH	479/133/99	69/22/14
All	All	rs1734792	153341060	MECP2	cerebral malaria	rec	All	0.0150536	0.0546611	0.78301	1.02(0.91-1.13)	SEH	9693/3065/3832	2139/562/622
Bamako	Mali	rs1734792	153341060	MECP2	cerebral malaria	dom	All	0.15528	0.282119	0.582041	1.17(0.67-2.03)	SEH	230/49/48	53/13/12
Banjul	Gambia	rs1734792	153341060	MECP2	cerebral malaria	dom	All	-0.118557	0.0981785	0.227215	0.89(0.73-1.08)	SEH	2419/476/326	624/103/74
Blantyre	Malawi	rs1734792	153341060	MECP2	cerebral malaria	dom	All	-0.0408261	0.0842899	0.628135	0.96(0.81-1.13)	SH	1575/495/437	552/167/150
Buea	Cameroon	rs1734792	153341060	MECP2	cerebral malaria	dom	All	0.0190165	0.394832	0.961586	1.02(0.47-2.21)	SEH	426/55/93	2007-05-27
Ho_Chi_Minh_City	VietNam	rs1734792	153341060	MECP2	cerebral malaria	dom	All	0.105608	0.191392	0.581095	1.11(0.76-1.62)	SE	382/445/1645	38/18/152
Ibadan	Nigeria	rs1734792	153341060	MECP2	cerebral malaria	dom	All	-0.995648	1.15265	0.387703	0.37(0.04-3.54)	SEH	2005-12-22	5/0/1
Kilifi	Kenya	rs1734792	153341060	MECP2	cerebral malaria	dom	All	0.0213709	0.0794283	0.787884	1.02(0.87-1.19)	SEH	2304/842/726	534/188/170
Kumasi	Ghana	rs1734792	153341060	MECP2	cerebral malaria	dom	All	-0.376889	0.173961	0.0302722	0.69(0.49-0.96)	SEH	1294/380/314	166/34/27
Madang	PapuaNewGuinea	rs1734792	153341060	MECP2	cerebral malaria	dom	All	-0.248817	0.468035	0.594988	0.78(0.31-1.95)	SE	187/27/25	37/4/2
Moshi	Tanzania	rs1734792	153341060	MECP2	cerebral malaria	dom	All	-0.107226	0.389431	0.783056	0.9(0.42-1.93)	SEH	257/112/85	2010-03-21
Noguchi	Ghana	rs1734792	153341060	MECP2	cerebral malaria	dom	All	0.110912	0.508218	0.827244	1.12(0.41-3.03)	SEH	118/39/29	2003-05-13
Ougadougou	BurkinaFaso	rs1734792	153341060	MECP2	cerebral malaria	dom	All	0.0835089	0.226112	0.711885	1.09(0.7-1.69)	SH	479/133/99	69/22/14
All	All	rs1734792	153341060	MECP2	cerebral malaria	dom	All	-0.0470451	0.0440341	0.28535	0.95(0.88-1.04)	SEH	9693/3065/3832	2139/562/622
Bamako	Mali	rs1734792	153341060	MECP2	cerebral malaria	add	F	0.318914	0.326107	0.328103	1.38(0.73-2.61)	EH	104/49/7	17/13/2
Banjul	Gambia	rs1734792	153341060	MECP2	cerebral malaria	add	F	-0.189105	0.113652	0.0961343	0.83(0.66-1.03)	EH	1090/476/42	288/103/7
Blantyre	Malawi	rs1734792	153341060	MECP2	cerebral malaria	add	F	-0.0164767	0.0919751	0.857826	0.98(0.82-1.18)	H	620/495/77	234/167/32
Buea	Cameroon	rs1734792	153341060	MECP2	cerebral malaria	add	F	-0.30698	0.457047	0.501801	0.74(0.3-1.8)	EH	97/55/7	2001-05-13
Ho_Chi_Minh_City	VietNam	rs1734792	153341060	MECP2	cerebral malaria	add	F	0.124807	0.265122	0.637818	1.13(0.67-1.9)	E	54/445/651	1/18/27
Ibadan	Nigeria	rs1734792	153341060	MECP2	cerebral malaria	add	F	0.551657	1.04795	0.5986	1.74(0.22-13.54)	EH	2002-12-08	1/0/1
Kilifi	Kenya	rs1734792	153341060	MECP2	cerebral malaria	add	F	0.045926	0.085527	0.591284	1.05(0.89-1.24)	EH	928/842/155	210/188/39
Kumasi	Ghana	rs1734792	153341060	MECP2	cerebral malaria	add	F	-0.297843	0.186436	0.11014	0.74(0.52-1.07)	EH	526/380/75	72/34/6
Madang	PapuaNewGuinea	rs1734792	153341060	MECP2	cerebral malaria	add	F	0.313427	0.480414	0.514137	1.37(0.53-3.51)	E	80/27/5	2001-04-13
Moshi	Tanzania	rs1734792	153341060	MECP2	cerebral malaria	add	F	-0.024269	0.387441	0.950054	0.98(0.46-2.09)	EH	114/112/23	2004-03-10
Noguchi	Ghana	rs1734792	153341060	MECP2	cerebral malaria	add	F	0.281675	0.55765	0.61348	1.33(0.44-3.95)	EH	40/39/5	2001-05-05
Ougadougou	BurkinaFaso	rs1734792	153341060	MECP2	cerebral malaria	add	F	0.160025	0.2609	0.539641	1.17(0.7-1.96)	H	196/133/15	23/22/2
All	All	rs1734792	153341060	MECP2	cerebral malaria	add	F	-0.0289091	0.0484948	0.55109	0.97(0.88-1.07)	EH	3857/3065/1064	887/562/123
Bamako	Mali	rs1734792	153341060	MECP2	cerebral malaria	rec	F	0.286785	0.856698	0.737809	1.33(0.25-7.14)	EH	104/49/7	17/13/2
Banjul	Gambia	rs1734792	153341060	MECP2	cerebral malaria	rec	F	-0.401486	0.416845	0.33547	0.67(0.3-1.52)	EH	1090/476/42	288/103/7
Blantyre	Malawi	rs1734792	153341060	MECP2	cerebral malaria	rec	F	0.19937	0.22134	0.367727	1.22(0.79-1.88)	H	620/495/77	234/167/32
Buea	Cameroon	rs1734792	153341060	MECP2	cerebral malaria	rec	F	0.259103	1.11145	0.815667	1.3(0.15-11.44)	EH	97/55/7	2001-05-13
Ho_Chi_Minh_City	VietNam	rs1734792	153341060	MECP2	cerebral malaria	rec	F	0.0641332	0.306246	0.834122	1.07(0.59-1.94)	E	54/445/651	1/18/27
Ibadan	Nigeria	rs1734792	153341060	MECP2	cerebral malaria	rec	F	2.07944	1.60078	0.193938	8(0.35-184.36)	EH	2002-12-08	1/0/1
Kilifi	Kenya	rs1734792	153341060	MECP2	cerebral malaria	rec	F	0.119795	0.194709	0.538388	1.13(0.77-1.65)	EH	928/842/155	210/188/39
Kumasi	Ghana	rs1734792	153341060	MECP2	cerebral malaria	rec	F	-0.134772	0.442313	0.760597	0.87(0.37-2.08)	EH	526/380/75	72/34/6
Madang	PapuaNewGuinea	rs1734792	153341060	MECP2	cerebral malaria	rec	F	0.518794	1.14538	0.65059	1.68(0.18-15.86)	E	80/27/5	2001-04-13
Moshi	Tanzania	rs1734792	153341060	MECP2	cerebral malaria	rec	F	1.04854	0.646541	0.104853	2.85(0.8-10.13)	EH	114/112/23	2004-03-10
Noguchi	Ghana	rs1734792	153341060	MECP2	cerebral malaria	rec	F	0.89791	1.24216	0.469765	2.45(0.22-28.01)	EH	40/39/5	2001-05-05
Ougadougou	BurkinaFaso	rs1734792	153341060	MECP2	cerebral malaria	rec	F	-0.127833	0.769582	0.868072	0.88(0.19-3.98)	H	196/133/15	23/22/2
All	All	rs1734792	153341060	MECP2	cerebral malaria	rec	F	0.10774	0.113694	0.343316	1.11(0.89-1.39)	EH	3857/3065/1064	887/562/123
Bamako	Mali	rs1734792	153341060	MECP2	cerebral malaria	dom	F	0.422503	0.406997	0.299223	1.53(0.69-3.39)	EH	104/49/7	17/13/2
Banjul	Gambia	rs1734792	153341060	MECP2	cerebral malaria	dom	F	-0.195941	0.126285	0.120763	0.82(0.64-1.05)	EH	1090/476/42	288/103/7
Blantyre	Malawi	rs1734792	153341060	MECP2	cerebral malaria	dom	F	-0.0753746	0.113253	0.505705	0.93(0.74-1.16)	H	620/495/77	234/167/32
Buea	Cameroon	rs1734792	153341060	MECP2	cerebral malaria	dom	F	-0.46699	0.528207	0.376639	0.63(0.22-1.77)	EH	97/55/7	2001-05-13
Ho_Chi_Minh_City	VietNam	rs1734792	153341060	MECP2	cerebral malaria	dom	F	0.809991	1.02114	0.427649	2.25(0.3-16.63)	E	54/445/651	1/18/27
Ibadan	Nigeria	rs1734792	153341060	MECP2	cerebral malaria	dom	F	-0.451985	1.49458	0.762335	0.64(0.03-11.91)	EH	2002-12-08	1/0/1
Kilifi	Kenya	rs1734792	153341060	MECP2	cerebral malaria	dom	F	0.0377499	0.109075	0.729273	1.04(0.84-1.29)	EH	928/842/155	210/188/39
Kumasi	Ghana	rs1734792	153341060	MECP2	cerebral malaria	dom	F	-0.419271	0.226546	0.0642111	0.66(0.42-1.03)	EH	526/380/75	72/34/6
Madang	PapuaNewGuinea	rs1734792	153341060	MECP2	cerebral malaria	dom	F	0.373431	0.62553	0.550519	1.45(0.43-4.95)	E	80/27/5	2001-04-13
Moshi	Tanzania	rs1734792	153341060	MECP2	cerebral malaria	dom	F	-0.597291	0.524128	0.254457	0.55(0.2-1.54)	EH	114/112/23	2004-03-10
Noguchi	Ghana	rs1734792	153341060	MECP2	cerebral malaria	dom	F	0.182004	0.663186	0.783747	1.2(0.33-4.4)	EH	40/39/5	2001-05-05
Ougadougou	BurkinaFaso	rs1734792	153341060	MECP2	cerebral malaria	dom	F	0.248412	0.313212	0.427713	1.28(0.69-2.37)	H	196/133/15	23/22/2
All	All	rs1734792	153341060	MECP2	cerebral malaria	dom	F	-0.0735355	0.0599649	0.220082	0.93(0.83-1.04)	EH	3857/3065/1064	887/562/123
Bamako	Mali	rs1734792	153341060	MECP2	cerebral malaria	het	F	0.384388	0.417667	0.357404	1.47(0.65-3.33)	EH	104/49/7	17/13/2
Banjul	Gambia	rs1734792	153341060	MECP2	cerebral malaria	het	F	-0.162285	0.129012	0.208426	0.85(0.66-1.09)	EH	1090/476/42	288/103/7
Blantyre	Malawi	rs1734792	153341060	MECP2	cerebral malaria	het	F	-0.130394	0.115626	0.259437	0.88(0.7-1.1)	H	620/495/77	234/167/32
Buea	Cameroon	rs1734792	153341060	MECP2	cerebral malaria	het	F	-0.553001	0.554871	0.318945	0.58(0.19-1.71)	EH	97/55/7	2001-05-13
Ho_Chi_Minh_City	VietNam	rs1734792	153341060	MECP2	cerebral malaria	het	F	0.0433481	0.308759	0.888348	1.04(0.57-1.91)	E	54/445/651	1/18/27
Ibadan	Nigeria	rs1734792	153341060	MECP2	cerebral malaria	het	F	-18.7957	5173.23	0.997101	0(0-Inf)	EH	2002-12-08	1/0/1
Kilifi	Kenya	rs1734792	153341060	MECP2	cerebral malaria	het	F	0.00118764	0.109939	0.991381	1(0.81-1.24)	EH	928/842/155	210/188/39
Kumasi	Ghana	rs1734792	153341060	MECP2	cerebral malaria	het	F	-0.410134	0.236971	0.0834988	0.66(0.42-1.06)	EH	526/380/75	72/34/6
Madang	PapuaNewGuinea	rs1734792	153341060	MECP2	cerebral malaria	het	F	0.2618	0.656787	0.690182	1.3(0.36-4.71)	E	80/27/5	2001-04-13
Moshi	Tanzania	rs1734792	153341060	MECP2	cerebral malaria	het	F	-1.3635	0.656075	0.0376841	0.26(0.07-0.93)	EH	114/112/23	2004-03-10
Noguchi	Ghana	rs1734792	153341060	MECP2	cerebral malaria	het	F	-0.0266261	0.659282	0.967785	0.97(0.27-3.55)	EH	40/39/5	2001-05-05
Ougadougou	BurkinaFaso	rs1734792	153341060	MECP2	cerebral malaria	het	F	0.274962	0.314328	0.381705	1.32(0.71-2.44)	H	196/133/15	23/22/2
All	All	rs1734792	153341060	MECP2	cerebral malaria	het	F	-0.103458	0.0603092	0.0862604	0.9(0.8-1.01)	EH	3857/3065/1064	887/562/123
Bamako	Mali	rs1734792	153341060	MECP2	cerebral malaria	dom	M	-0.0601978	0.417323	0.885305	0.94(0.42-2.13)	EH	126/0/41	36/0/10
Banjul	Gambia	rs1734792	153341060	MECP2	cerebral malaria	dom	M	-0.000240383	0.153535	0.998751	1(0.74-1.35)	EH	1329/0/284	336/0/67
Blantyre	Malawi	rs1734792	153341060	MECP2	cerebral malaria	dom	M	0.00161651	0.125178	0.989697	1(0.78-1.28)	H	955/0/360	318/0/118
Buea	Cameroon	rs1734792	153341060	MECP2	cerebral malaria	dom	M	0.535281	0.50906	0.293025	1.71(0.63-4.63)	EH	329/0/86	14/0/6
Ho_Chi_Minh_City	VietNam	rs1734792	153341060	MECP2	cerebral malaria	dom	M	0.0641607	0.198445	0.746455	1.07(0.72-1.57)	E	328/0/994	37/0/125
Ibadan	Nigeria	rs1734792	153341060	MECP2	cerebral malaria	dom	M	-18.0619	5667.72	0.997457	0(0-Inf)	H	14/0/3	4/0/0
Kilifi	Kenya	rs1734792	153341060	MECP2	cerebral malaria	dom	M	0.00430172	0.116933	0.970654	1(0.8-1.26)	EH	1376/0/571	324/0/131
Kumasi	Ghana	rs1734792	153341060	MECP2	cerebral malaria	dom	M	-0.336341	0.267774	0.209093	0.71(0.42-1.21)	EH	768/0/239	94/0/21
Madang	PapuaNewGuinea	rs1734792	153341060	MECP2	cerebral malaria	dom	M	-1.26155	1.06002	0.233999	0.28(0.04-2.26)	E	107/0/20	24/0/1
Moshi	Tanzania	rs1734792	153341060	MECP2	cerebral malaria	dom	M	0.468465	0.55323	0.397117	1.6(0.54-4.72)	EH	143/0/62	11/0/6
Noguchi	Ghana	rs1734792	153341060	MECP2	cerebral malaria	dom	M	-0.0873891	0.848914	0.918009	0.92(0.17-4.84)	EH	78/0/24	8/0/2
Ougadougou	BurkinaFaso	rs1734792	153341060	MECP2	cerebral malaria	dom	M	-0.11441	0.350055	0.743792	0.89(0.45-1.77)	H	283/0/84	46/0/12
All	All	rs1734792	153341060	MECP2	cerebral malaria	dom	M	-0.0119848	0.0639007	0.851226	0.99(0.87-1.12)	EH	5822/0/2765	1248/0/499
Bamako	Mali	rs1734792	153341060	MECP2	severe malarial anaemia	add	All	0.183003	0.122664	0.135724	1.2(0.94-1.53)	SEH	230/49/48	116/30/35
Banjul	Gambia	rs1734792	153341060	MECP2	severe malarial anaemia	add	All	0.0116132	0.075147	0.877184	1.01(0.87-1.17)	SEH	2419/476/326	347/75/43
Blantyre	Malawi	rs1734792	153341060	MECP2	severe malarial anaemia	add	All	0.226688	0.113799	0.0463716	1.25(1-1.57)	SH	1575/495/437	73/24/32
Buea	Cameroon	rs1734792	153341060	MECP2	severe malarial anaemia	add	All	0.201901	0.161239	0.210502	1.22(0.89-1.68)	SEH	426/55/93	51/14/15
Ho_Chi_Minh_City	VietNam	rs1734792	153341060	MECP2	severe malarial anaemia	add	All	0.00567952	0.250941	0.981943	1.01(0.61-1.64)	SE	382/445/1645	2019-08-04
Ibadan	Nigeria	rs1734792	153341060	MECP2	severe malarial anaemia	add	All	0.994795	0.574958	0.083594	2.7(0.88-8.35)	SEH	2005-12-22	2003-02-02
Kilifi	Kenya	rs1734792	153341060	MECP2	severe malarial anaemia	add	All	0.106357	0.10118	0.293185	1.11(0.91-1.36)	SEH	2304/842/726	88/31/35
Kumasi	Ghana	rs1734792	153341060	MECP2	severe malarial anaemia	add	All	0.0856297	0.0683653	0.210376	1.09(0.95-1.25)	SEH	1294/380/314	334/109/101
Madang	PapuaNewGuinea	rs1734792	153341060	MECP2	severe malarial anaemia	add	All	-0.00685319	0.178641	0.969398	0.99(0.7-1.41)	SE	187/27/25	89/17/9
Moshi	Tanzania	rs1734792	153341060	MECP2	severe malarial anaemia	add	All	-0.138495	0.120651	0.251009	0.87(0.69-1.1)	SEH	257/112/85	116/30/33
Noguchi	Ghana	rs1734792	153341060	MECP2	severe malarial anaemia	add	All	0.130711	0.129065	0.311177	1.14(0.88-1.47)	SEH	118/39/29	145/40/47
Ougadougou	BurkinaFaso	rs1734792	153341060	MECP2	severe malarial anaemia	add	All	0.436101	0.203631	0.0322236	1.55(1.04-2.31)	SH	479/133/99	2009-10-19
All	All	rs1734792	153341060	MECP2	severe malarial anaemia	add	All	0.0925441	0.0336424	0.00594467	1.1(1.03-1.17)	SEH	9693/3065/3832	1384/390/381
Bamako	Mali	rs1734792	153341060	MECP2	severe malarial anaemia	rec	All	0.273809	0.260483	0.293185	1.31(0.79-2.19)	SEH	230/49/48	116/30/35
Banjul	Gambia	rs1734792	153341060	MECP2	severe malarial anaemia	rec	All	-0.113621	0.175935	0.518403	0.89(0.63-1.26)	SEH	2419/476/326	347/75/43
Blantyre	Malawi	rs1734792	153341060	MECP2	severe malarial anaemia	rec	All	0.55343	0.229229	0.0157651	1.74(1.11-2.73)	SH	1575/495/437	73/24/32
Buea	Cameroon	rs1734792	153341060	MECP2	severe malarial anaemia	rec	All	0.490254	0.327847	0.134816	1.63(0.86-3.1)	SEH	426/55/93	51/14/15
Ho_Chi_Minh_City	VietNam	rs1734792	153341060	MECP2	severe malarial anaemia	rec	All	-0.0701398	0.393216	0.858429	0.93(0.43-2.01)	SE	382/445/1645	2019-08-04
Ibadan	Nigeria	rs1734792	153341060	MECP2	severe malarial anaemia	rec	All	1.85724	1.01128	0.0662808	6.41(0.88-46.49)	SEH	2005-12-22	2003-02-02
Kilifi	Kenya	rs1734792	153341060	MECP2	severe malarial anaemia	rec	All	0.219905	0.201583	0.275321	1.25(0.84-1.85)	SEH	2304/842/726	88/31/35
Kumasi	Ghana	rs1734792	153341060	MECP2	severe malarial anaemia	rec	All	0.117443	0.144484	0.416308	1.12(0.85-1.49)	SEH	1294/380/314	334/109/101
Madang	PapuaNewGuinea	rs1734792	153341060	MECP2	severe malarial anaemia	rec	All	-0.226105	0.40978	0.581106	0.8(0.36-1.78)	SE	187/27/25	89/17/9
Moshi	Tanzania	rs1734792	153341060	MECP2	severe malarial anaemia	rec	All	-0.243324	0.245044	0.320718	0.78(0.49-1.27)	SEH	257/112/85	116/30/33
Noguchi	Ghana	rs1734792	153341060	MECP2	severe malarial anaemia	rec	All	0.287219	0.274325	0.295098	1.33(0.78-2.28)	SEH	118/39/29	145/40/47
Ougadougou	BurkinaFaso	rs1734792	153341060	MECP2	severe malarial anaemia	rec	All	0.788176	0.409984	0.0545483	2.2(0.98-4.91)	SH	479/133/99	2009-10-19
All	All	rs1734792	153341060	MECP2	severe malarial anaemia	rec	All	0.156898	0.0710646	0.0272567	1.17(1.02-1.34)	SEH	9693/3065/3832	1384/390/381
Bamako	Mali	rs1734792	153341060	MECP2	severe malarial anaemia	dom	All	0.335696	0.204202	0.100189	1.4(0.94-2.09)	SEH	230/49/48	116/30/35
Banjul	Gambia	rs1734792	153341060	MECP2	severe malarial anaemia	dom	All	0.0797047	0.11693	0.495464	1.08(0.86-1.36)	SEH	2419/476/326	347/75/43
Blantyre	Malawi	rs1734792	153341060	MECP2	severe malarial anaemia	dom	All	0.266548	0.189319	0.159152	1.31(0.9-1.89)	SH	1575/495/437	73/24/32
Buea	Cameroon	rs1734792	153341060	MECP2	severe malarial anaemia	dom	All	0.24519	0.272855	0.36886	1.28(0.75-2.18)	SEH	426/55/93	51/14/15
Ho_Chi_Minh_City	VietNam	rs1734792	153341060	MECP2	severe malarial anaemia	dom	All	0.173587	0.565592	0.758911	1.19(0.39-3.6)	SE	382/445/1645	2019-08-04
Ibadan	Nigeria	rs1734792	153341060	MECP2	severe malarial anaemia	dom	All	1.42228	1.06822	0.183042	4.15(0.51-33.65)	SEH	2005-12-22	2003-02-02
Kilifi	Kenya	rs1734792	153341060	MECP2	severe malarial anaemia	dom	All	0.156528	0.176347	0.374749	1.17(0.83-1.65)	SEH	2304/842/726	88/31/35
Kumasi	Ghana	rs1734792	153341060	MECP2	severe malarial anaemia	dom	All	0.160712	0.113443	0.156576	1.17(0.94-1.47)	SEH	1294/380/314	334/109/101
Madang	PapuaNewGuinea	rs1734792	153341060	MECP2	severe malarial anaemia	dom	All	0.0895207	0.279824	0.749031	1.09(0.63-1.89)	SE	187/27/25	89/17/9
Moshi	Tanzania	rs1734792	153341060	MECP2	severe malarial anaemia	dom	All	-0.227823	0.202196	0.259851	0.8(0.54-1.18)	SEH	257/112/85	116/30/33
Noguchi	Ghana	rs1734792	153341060	MECP2	severe malarial anaemia	dom	All	0.182262	0.213914	0.394195	1.2(0.79-1.82)	SEH	118/39/29	145/40/47
Ougadougou	BurkinaFaso	rs1734792	153341060	MECP2	severe malarial anaemia	dom	All	0.687802	0.35623	0.0535104	1.99(0.99-4)	SH	479/133/99	2009-10-19
All	All	rs1734792	153341060	MECP2	severe malarial anaemia	dom	All	0.153754	0.0555858	0.00567363	1.17(1.05-1.3)	SEH	9693/3065/3832	1384/390/381
Bamako	Mali	rs1734792	153341060	MECP2	severe malarial anaemia	add	F	0.348814	0.236054	0.139491	1.42(0.89-2.25)	EH	104/49/7	43/30/5
Banjul	Gambia	rs1734792	153341060	MECP2	severe malarial anaemia	add	F	0.0853453	0.136033	0.530407	1.09(0.83-1.42)	EH	1090/476/42	143/75/3
Blantyre	Malawi	rs1734792	153341060	MECP2	severe malarial anaemia	add	F	0.295111	0.199559	0.139191	1.34(0.91-1.99)	H	620/495/77	31/24/9
Buea	Cameroon	rs1734792	153341060	MECP2	severe malarial anaemia	add	F	0.109191	0.304928	0.720279	1.12(0.61-2.03)	EH	97/55/7	21/14/4
Ho_Chi_Minh_City	VietNam	rs1734792	153341060	MECP2	severe malarial anaemia	add	F	0.130171	0.434133	0.764298	1.14(0.49-2.67)	E	54/445/651	0/8/9
Ibadan	Nigeria	rs1734792	153341060	MECP2	severe malarial anaemia	add	F	1.09861	1.00356	0.27364	3(0.42-21.45)	EH	2002-12-08	2001-02-01
Kilifi	Kenya	rs1734792	153341060	MECP2	severe malarial anaemia	add	F	-0.106828	0.199743	0.592771	0.9(0.61-1.33)	EH	928/842/155	35/31/4
Kumasi	Ghana	rs1734792	153341060	MECP2	severe malarial anaemia	add	F	0.0874292	0.121812	0.472919	1.09(0.86-1.39)	EH	526/380/75	129/109/19
Madang	PapuaNewGuinea	rs1734792	153341060	MECP2	severe malarial anaemia	add	F	0.0262166	0.309776	0.932555	1.03(0.56-1.88)	E	80/27/5	43/17/1
Moshi	Tanzania	rs1734792	153341060	MECP2	severe malarial anaemia	add	F	-0.422088	0.227894	0.064008	0.66(0.42-1.02)	EH	114/112/23	39/30/3
Noguchi	Ghana	rs1734792	153341060	MECP2	severe malarial anaemia	add	F	0.229895	0.266093	0.387608	1.26(0.75-2.12)	EH	40/39/5	43/40/7
Ougadougou	BurkinaFaso	rs1734792	153341060	MECP2	severe malarial anaemia	add	F	0.28438	0.375162	0.448439	1.33(0.64-2.77)	H	196/133/15	2001-10-09
All	All	rs1734792	153341060	MECP2	severe malarial anaemia	add	F	0.0847602	0.0618764	0.17074	1.09(0.96-1.23)	EH	3857/3065/1064	537/390/66
Bamako	Mali	rs1734792	153341060	MECP2	severe malarial anaemia	rec	F	0.411389	0.60868	0.499122	1.51(0.46-4.97)	EH	104/49/7	43/30/5
Banjul	Gambia	rs1734792	153341060	MECP2	severe malarial anaemia	rec	F	-0.674913	0.605188	0.264759	0.51(0.16-1.67)	EH	1090/476/42	143/75/3
Blantyre	Malawi	rs1734792	153341060	MECP2	severe malarial anaemia	rec	F	0.922752	0.380432	0.0152856	2.52(1.19-5.3)	H	620/495/77	31/24/9
Buea	Cameroon	rs1734792	153341060	MECP2	severe malarial anaemia	rec	F	0.516987	0.733054	0.480654	1.68(0.4-7.06)	EH	97/55/7	21/14/4
Ho_Chi_Minh_City	VietNam	rs1734792	153341060	MECP2	severe malarial anaemia	rec	F	-0.0221185	0.497491	0.964538	0.98(0.37-2.59)	E	54/445/651	0/8/9
Ibadan	Nigeria	rs1734792	153341060	MECP2	severe malarial anaemia	rec	F	2.07944	1.60078	0.193938	8(0.35-184.36)	EH	2002-12-08	2001-02-01
Kilifi	Kenya	rs1734792	153341060	MECP2	severe malarial anaemia	rec	F	-0.336618	0.523302	0.520057	0.71(0.26-1.99)	EH	928/842/155	35/31/4
Kumasi	Ghana	rs1734792	153341060	MECP2	severe malarial anaemia	rec	F	-0.0402404	0.295118	0.891542	0.96(0.54-1.71)	EH	526/380/75	129/109/19
Madang	PapuaNewGuinea	rs1734792	153341060	MECP2	severe malarial anaemia	rec	F	-0.985284	1.11091	0.375125	0.37(0.04-3.29)	E	80/27/5	43/17/1
Moshi	Tanzania	rs1734792	153341060	MECP2	severe malarial anaemia	rec	F	-1.05584	0.638684	0.0982994	0.35(0.1-1.22)	EH	114/112/23	39/30/3
Noguchi	Ghana	rs1734792	153341060	MECP2	severe malarial anaemia	rec	F	0.727651	0.691032	0.292345	2.07(0.53-8.02)	EH	40/39/5	43/40/7
Ougadougou	BurkinaFaso	rs1734792	153341060	MECP2	severe malarial anaemia	rec	F	0.041243	1.05956	0.96895	1.04(0.13-8.31)	H	196/133/15	2001-10-09
All	All	rs1734792	153341060	MECP2	severe malarial anaemia	rec	F	0.0201874	0.153453	0.895337	1.02(0.76-1.38)	EH	3857/3065/1064	537/390/66
Bamako	Mali	rs1734792	153341060	MECP2	severe malarial anaemia	dom	F	0.432512	0.290294	0.136247	1.54(0.87-2.72)	EH	104/49/7	43/30/5
Banjul	Gambia	rs1734792	153341060	MECP2	severe malarial anaemia	dom	F	0.165291	0.15273	0.279143	1.18(0.87-1.59)	EH	1090/476/42	143/75/3
Blantyre	Malawi	rs1734792	153341060	MECP2	severe malarial anaemia	dom	F	0.151074	0.257114	0.556818	1.16(0.7-1.93)	H	620/495/77	31/24/9
Buea	Cameroon	rs1734792	153341060	MECP2	severe malarial anaemia	dom	F	0.0392442	0.372798	0.916162	1.04(0.5-2.16)	EH	97/55/7	21/14/4
Ho_Chi_Minh_City	VietNam	rs1734792	153341060	MECP2	severe malarial anaemia	dom	F	14.4036	871.726	0.986817	1800533.15(0-Inf)	E	54/445/651	0/8/9
Ibadan	Nigeria	rs1734792	153341060	MECP2	severe malarial anaemia	dom	F	0.780566	1.32195	0.554877	2.18(0.16-29.12)	EH	2002-12-08	2001-02-01
Kilifi	Kenya	rs1734792	153341060	MECP2	severe malarial anaemia	dom	F	-0.080996	0.247984	0.743957	0.92(0.57-1.5)	EH	928/842/155	35/31/4
Kumasi	Ghana	rs1734792	153341060	MECP2	severe malarial anaemia	dom	F	0.153035	0.155874	0.326206	1.17(0.86-1.58)	EH	526/380/75	129/109/19
Madang	PapuaNewGuinea	rs1734792	153341060	MECP2	severe malarial anaemia	dom	F	0.180006	0.368515	0.625223	1.2(0.58-2.47)	E	80/27/5	43/17/1
Moshi	Tanzania	rs1734792	153341060	MECP2	severe malarial anaemia	dom	F	-0.395412	0.279974	0.157856	0.67(0.39-1.17)	EH	114/112/23	39/30/3
Noguchi	Ghana	rs1734792	153341060	MECP2	severe malarial anaemia	dom	F	0.171543	0.32195	0.594154	1.19(0.63-2.23)	EH	40/39/5	43/40/7
Ougadougou	BurkinaFaso	rs1734792	153341060	MECP2	severe malarial anaemia	dom	F	0.406523	0.463656	0.380608	1.5(0.61-3.73)	H	196/133/15	2001-10-09
All	All	rs1734792	153341060	MECP2	severe malarial anaemia	dom	F	0.123882	0.0765823	0.105741	1.13(0.97-1.32)	EH	3857/3065/1064	537/390/66
Bamako	Mali	rs1734792	153341060	MECP2	severe malarial anaemia	het	F	0.361433	0.29714	0.223843	1.44(0.8-2.57)	EH	104/49/7	43/30/5
Banjul	Gambia	rs1734792	153341060	MECP2	severe malarial anaemia	het	F	0.230148	0.154427	0.136137	1.26(0.93-1.7)	EH	1090/476/42	143/75/3
Blantyre	Malawi	rs1734792	153341060	MECP2	severe malarial anaemia	het	F	-0.17496	0.265155	0.509356	0.84(0.5-1.41)	H	620/495/77	31/24/9
Buea	Cameroon	rs1734792	153341060	MECP2	severe malarial anaemia	het	F	-0.086751	0.382653	0.82065	0.92(0.43-1.94)	EH	97/55/7	21/14/4
Ho_Chi_Minh_City	VietNam	rs1734792	153341060	MECP2	severe malarial anaemia	het	F	0.221341	0.496718	0.655881	1.25(0.47-3.3)	E	54/445/651	0/8/9
Ibadan	Nigeria	rs1734792	153341060	MECP2	severe malarial anaemia	het	F	-0.271363	1.1676	0.816219	0.76(0.08-7.52)	EH	2002-12-08	2001-02-01
Kilifi	Kenya	rs1734792	153341060	MECP2	severe malarial anaemia	het	F	0.00605924	0.249824	0.98065	1.01(0.62-1.64)	EH	928/842/155	35/31/4
Kumasi	Ghana	rs1734792	153341060	MECP2	severe malarial anaemia	het	F	0.169033	0.157481	0.283111	1.18(0.87-1.61)	EH	526/380/75	129/109/19
Madang	PapuaNewGuinea	rs1734792	153341060	MECP2	severe malarial anaemia	het	F	0.345023	0.379909	0.363787	1.41(0.67-2.97)	E	80/27/5	43/17/1
Moshi	Tanzania	rs1734792	153341060	MECP2	severe malarial anaemia	het	F	-0.120475	0.280822	0.667917	0.89(0.51-1.54)	EH	114/112/23	39/30/3
Noguchi	Ghana	rs1734792	153341060	MECP2	severe malarial anaemia	het	F	0.00369115	0.322028	0.990855	1(0.53-1.89)	EH	40/39/5	43/40/7
Ougadougou	BurkinaFaso	rs1734792	153341060	MECP2	severe malarial anaemia	het	F	0.402795	0.461896	0.383183	1.5(0.61-3.7)	H	196/133/15	2001-10-09
All	All	rs1734792	153341060	MECP2	severe malarial anaemia	het	F	0.119925	0.0767555	0.118187	1.13(0.97-1.31)	EH	3857/3065/1064	537/390/66
Bamako	Mali	rs1734792	153341060	MECP2	severe malarial anaemia	dom	M	0.288875	0.291336	0.321416	1.33(0.75-2.36)	EH	126/0/41	73/0/30
Banjul	Gambia	rs1734792	153341060	MECP2	severe malarial anaemia	dom	M	-0.0392043	0.18753	0.834404	0.96(0.67-1.39)	EH	1329/0/284	204/0/40
Blantyre	Malawi	rs1734792	153341060	MECP2	severe malarial anaemia	dom	M	0.393059	0.267141	0.141195	1.48(0.88-2.5)	H	955/0/360	42/0/23
Buea	Cameroon	rs1734792	153341060	MECP2	severe malarial anaemia	dom	M	0.502378	0.390692	0.19849	1.65(0.77-3.55)	EH	329/0/86	30/0/11
Ho_Chi_Minh_City	VietNam	rs1734792	153341060	MECP2	severe malarial anaemia	dom	M	-0.0973551	0.602321	0.871595	0.91(0.28-2.95)	E	328/0/994	4/0/10
Ibadan	Nigeria	rs1734792	153341060	MECP2	severe malarial anaemia	dom	M	2.25396	1.39826	0.106969	9.53(0.61-147.6)	H	14/0/3	1/0/2
Kilifi	Kenya	rs1734792	153341060	MECP2	severe malarial anaemia	dom	M	0.365766	0.233643	0.117468	1.44(0.91-2.28)	EH	1376/0/571	53/0/31
Kumasi	Ghana	rs1734792	153341060	MECP2	severe malarial anaemia	dom	M	0.172063	0.1665	0.301413	1.19(0.86-1.65)	EH	768/0/239	205/0/82
Madang	PapuaNewGuinea	rs1734792	153341060	MECP2	severe malarial anaemia	dom	M	-0.102423	0.480508	0.831206	0.9(0.35-2.31)	E	107/0/20	46/0/8
Moshi	Tanzania	rs1734792	153341060	MECP2	severe malarial anaemia	dom	M	-0.0233969	0.286084	0.934819	0.98(0.56-1.71)	EH	143/0/62	77/0/30
Noguchi	Ghana	rs1734792	153341060	MECP2	severe malarial anaemia	dom	M	0.207194	0.308868	0.502338	1.23(0.67-2.25)	EH	78/0/24	102/0/40
Ougadougou	BurkinaFaso	rs1734792	153341060	MECP2	severe malarial anaemia	dom	M	1.00618	0.492408	0.0410142	2.74(1.04-7.18)	H	283/0/84	10/0/8
All	All	rs1734792	153341060	MECP2	severe malarial anaemia	dom	M	0.200988	0.0814532	0.0136048	1.22(1.04-1.43)	EH	5836/0/2768	847/0/315
Bamako	Mali	rs1734792	153341060	MECP2	cerebral malaria and severe malaria1 anaemia	add	All	0.284558	0.173749	0.101473	1.33(0.95-1.87)	SEH	230/49/48	38/18/13
Banjul	Gambia	rs1734792	153341060	MECP2	cerebral malaria and severe malaria1 anaemia	add	All	-0.0905928	0.146913	0.53747	0.91(0.68-1.22)	SEH	2419/476/326	108/14/13
Blantyre	Malawi	rs1734792	153341060	MECP2	cerebral malaria and severe malaria1 anaemia	add	All	0.189592	0.102408	0.0641189	1.21(0.99-1.48)	SH	1575/495/437	93/24/40
Buea	Cameroon	rs1734792	153341060	MECP2	cerebral malaria and severe malaria1 anaemia	add	All	-0.0499102	0.573519	0.930652	0.95(0.31-2.93)	SEH	426/55/93	2001-01-05
Ho_Chi_Minh_City	VietNam	rs1734792	153341060	MECP2	cerebral malaria and severe malaria1 anaemia	add	All	0.268781	0.749928	0.720037	1.31(0.3-5.69)	SE	382/445/1645	2006-01-01
Ibadan	Nigeria	rs1734792	153341060	MECP2	cerebral malaria and severe malaria1 anaemia	add	All	-3.11021e-16	0.234619	1	1(0.63-1.58)	SEH	2005-12-22	0/0/0
Kilifi	Kenya	rs1734792	153341060	MECP2	cerebral malaria and severe malaria1 anaemia	add	All	0.0315014	0.0918726	0.731688	1.03(0.86-1.24)	SEH	2304/842/726	125/46/39
Kumasi	Ghana	rs1734792	153341060	MECP2	cerebral malaria and severe malaria1 anaemia	add	All	0.215485	0.15034	0.151766	1.24(0.92-1.67)	SEH	1294/380/314	49/6/20
Madang	PapuaNewGuinea	rs1734792	153341060	MECP2	cerebral malaria and severe malaria1 anaemia	add	All	1.08249	0.418543	0.00970073	2.95(1.3-6.7)	SE	187/27/25	2002-02-05
Moshi	Tanzania	rs1734792	153341060	MECP2	cerebral malaria and severe malaria1 anaemia	add	All	-0.392261	0.320484	0.220966	0.68(0.36-1.27)	SEH	257/112/85	2004-05-19
Noguchi	Ghana	rs1734792	153341060	MECP2	cerebral malaria and severe malaria1 anaemia	add	All	0.315324	0.380583	0.407371	1.37(0.65-2.89)	SEH	118/39/29	2003-03-08
Ougadougou	BurkinaFaso	rs1734792	153341060	MECP2	cerebral malaria and severe malaria1 anaemia	add	All	0.213877	0.302688	0.47982	1.24(0.68-2.24)	SH	479/133/99	2005-02-13
All	All	rs1734792	153341060	MECP2	cerebral malaria and severe malaria1 anaemia	add	All	0.103291	0.0509866	0.0427806	1.11(1-1.23)	SEH	9693/3065/3832	464/122/146
Bamako	Mali	rs1734792	153341060	MECP2	cerebral malaria and severe malaria1 anaemia	rec	All	0.273192	0.384404	0.477277	1.31(0.62-2.79)	SEH	230/49/48	38/18/13
Banjul	Gambia	rs1734792	153341060	MECP2	cerebral malaria and severe malaria1 anaemia	rec	All	-0.0358901	0.309416	0.907658	0.96(0.53-1.77)	SEH	2419/476/326	108/14/13
Blantyre	Malawi	rs1734792	153341060	MECP2	cerebral malaria and severe malaria1 anaemia	rec	All	0.511175	0.19876	0.0101164	1.67(1.13-2.46)	SH	1575/495/437	93/24/40
Buea	Cameroon	rs1734792	153341060	MECP2	cerebral malaria and severe malaria1 anaemia	rec	All	0.000685155	1.1594	0.999528	1(0.1-9.71)	SEH	426/55/93	2001-01-05
Ho_Chi_Minh_City	VietNam	rs1734792	153341060	MECP2	cerebral malaria and severe malaria1 anaemia	rec	All	0.706025	0.812537	0.384894	2.03(0.41-9.96)	SE	382/445/1645	2006-01-01
Ibadan	Nigeria	rs1734792	153341060	MECP2	cerebral malaria and severe malaria1 anaemia	rec	All	2.57808e-15	0.483624	1	1(0.39-2.58)	SEH	2005-12-22	0/0/0
Kilifi	Kenya	rs1734792	153341060	MECP2	cerebral malaria and severe malaria1 anaemia	rec	All	0.0593263	0.186193	0.750009	1.06(0.74-1.53)	SEH	2304/842/726	125/46/39
Kumasi	Ghana	rs1734792	153341060	MECP2	cerebral malaria and severe malaria1 anaemia	rec	All	0.564509	0.284231	0.0470231	1.76(1.01-3.07)	SEH	1294/380/314	49/6/20
Madang	PapuaNewGuinea	rs1734792	153341060	MECP2	cerebral malaria and severe malaria1 anaemia	rec	All	1.59926	0.857091	0.0620533	4.95(0.92-26.55)	SE	187/27/25	2002-02-05
Moshi	Tanzania	rs1734792	153341060	MECP2	cerebral malaria and severe malaria1 anaemia	rec	All	-0.548596	0.652514	0.400493	0.58(0.16-2.08)	SEH	257/112/85	2004-05-19
Noguchi	Ghana	rs1734792	153341060	MECP2	cerebral malaria and severe malaria1 anaemia	rec	All	0.649865	0.739727	0.379661	1.92(0.45-8.16)	SEH	118/39/29	2003-03-08
Ougadougou	BurkinaFaso	rs1734792	153341060	MECP2	cerebral malaria and severe malaria1 anaemia	rec	All	0.727116	0.56444	0.197674	2.07(0.68-6.26)	SH	479/133/99	2005-02-13
All	All	rs1734792	153341060	MECP2	cerebral malaria and severe malaria1 anaemia	rec	All	0.277971	0.102098	0.00647692	1.32(1.08-1.61)	SEH	9693/3065/3832	464/122/146
Bamako	Mali	rs1734792	153341060	MECP2	cerebral malaria and severe malaria1 anaemia	dom	All	0.583896	0.283792	0.0396399	1.79(1.03-3.13)	SEH	230/49/48	38/18/13
Banjul	Gambia	rs1734792	153341060	MECP2	cerebral malaria and severe malaria1 anaemia	dom	All	-0.201997	0.224304	0.367825	0.82(0.53-1.27)	SEH	2419/476/326	108/14/13
Blantyre	Malawi	rs1734792	153341060	MECP2	cerebral malaria and severe malaria1 anaemia	dom	All	0.196889	0.178077	0.268881	1.22(0.86-1.73)	SH	1575/495/437	93/24/40
Buea	Cameroon	rs1734792	153341060	MECP2	cerebral malaria and severe malaria1 anaemia	dom	All	-0.13254	0.920281	0.885484	0.88(0.14-5.32)	SEH	426/55/93	2001-01-05
Ho_Chi_Minh_City	VietNam	rs1734792	153341060	MECP2	cerebral malaria and severe malaria1 anaemia	dom	All	-0.682004	1.27059	0.591433	0.51(0.04-6.1)	SE	382/445/1645	2006-01-01
Ibadan	Nigeria	rs1734792	153341060	MECP2	cerebral malaria and severe malaria1 anaemia	dom	All	6.7461e-16	0.367313	1	1(0.49-2.05)	SEH	2005-12-22	0/0/0
Kilifi	Kenya	rs1734792	153341060	MECP2	cerebral malaria and severe malaria1 anaemia	dom	All	0.048064	0.153432	0.754083	1.05(0.78-1.42)	SEH	2304/842/726	125/46/39
Kumasi	Ghana	rs1734792	153341060	MECP2	cerebral malaria and severe malaria1 anaemia	dom	All	0.246358	0.282282	0.382807	1.28(0.74-2.22)	SEH	1294/380/314	49/6/20
Madang	PapuaNewGuinea	rs1734792	153341060	MECP2	cerebral malaria and severe malaria1 anaemia	dom	All	2.1364	0.825114	0.00961943	8.47(1.68-42.67)	SE	187/27/25	2002-02-05
Moshi	Tanzania	rs1734792	153341060	MECP2	cerebral malaria and severe malaria1 anaemia	dom	All	-0.636627	0.45563	0.162339	0.53(0.22-1.29)	SEH	257/112/85	2004-05-19
Noguchi	Ghana	rs1734792	153341060	MECP2	cerebral malaria and severe malaria1 anaemia	dom	All	0.449974	0.649388	0.48836	1.57(0.44-5.6)	SEH	118/39/29	2003-03-08
Ougadougou	BurkinaFaso	rs1734792	153341060	MECP2	cerebral malaria and severe malaria1 anaemia	dom	All	0.109963	0.518914	0.832177	1.12(0.4-3.09)	SH	479/133/99	2005-02-13
All	All	rs1734792	153341060	MECP2	cerebral malaria and severe malaria1 anaemia	dom	All	0.106983	0.0853737	0.210164	1.11(0.94-1.32)	SEH	9693/3065/3832	464/122/146
Bamako	Mali	rs1734792	153341060	MECP2	cerebral malaria and severe malaria1 anaemia	add	F	0.413467	0.323093	0.200645	1.51(0.8-2.85)	EH	104/49/7	17/18/1
Banjul	Gambia	rs1734792	153341060	MECP2	cerebral malaria and severe malaria1 anaemia	add	F	-0.189438	0.263641	0.472421	0.83(0.49-1.39)	EH	1090/476/42	46/14/2
Blantyre	Malawi	rs1734792	153341060	MECP2	cerebral malaria and severe malaria1 anaemia	add	F	-0.147131	0.207849	0.479023	0.86(0.57-1.3)	H	620/495/77	41/24/5
Buea	Cameroon	rs1734792	153341060	MECP2	cerebral malaria and severe malaria1 anaemia	add	F	-0.561986	1.11659	0.61475	0.57(0.06-5.09)	EH	97/55/7	2000-01-02
Ho_Chi_Minh_City	VietNam	rs1734792	153341060	MECP2	cerebral malaria and severe malaria1 anaemia	add	F	0.124574	0.667977	0.852058	1.13(0.31-4.19)	E	54/445/651	2005-01-01
Ibadan	Nigeria	rs1734792	153341060	MECP2	cerebral malaria and severe malaria1 anaemia	add	F	9.29462e-15	75075.3	1	1(0-Inf)	EH	2002-12-08	0/0/0
Kilifi	Kenya	rs1734792	153341060	MECP2	cerebral malaria and severe malaria1 anaemia	add	F	-0.20371	0.166693	0.221685	0.82(0.59-1.13)	EH	928/842/155	56/46/4
Kumasi	Ghana	rs1734792	153341060	MECP2	cerebral malaria and severe malaria1 anaemia	add	F	-0.252945	0.382643	0.508582	0.78(0.37-1.64)	EH	526/380/75	2002-06-17
Madang	PapuaNewGuinea	rs1734792	153341060	MECP2	cerebral malaria and severe malaria1 anaemia	add	F	1.29755	0.972702	0.182215	3.66(0.54-24.63)	E	80/27/5	2000-02-03
Moshi	Tanzania	rs1734792	153341060	MECP2	cerebral malaria and severe malaria1 anaemia	add	F	-0.440984	0.459371	0.337069	0.64(0.26-1.58)	EH	114/112/23	2001-05-09
Noguchi	Ghana	rs1734792	153341060	MECP2	cerebral malaria and severe malaria1 anaemia	add	F	-0.223868	0.709573	0.752384	0.8(0.2-3.21)	EH	40/39/5	2000-03-04
Ougadougou	BurkinaFaso	rs1734792	153341060	MECP2	cerebral malaria and severe malaria1 anaemia	add	F	-0.154771	0.591604	0.79362	0.86(0.27-2.73)	H	196/133/15	2001-02-06
All	All	rs1734792	153341060	MECP2	cerebral malaria and severe malaria1 anaemia	add	F	-0.129906	0.097413	0.182348	0.88(0.73-1.06)	EH	3857/3065/1064	202/122/21
Bamako	Mali	rs1734792	153341060	MECP2	cerebral malaria and severe malaria1 anaemia	rec	F	-0.653783	1.1018	0.552927	0.52(0.06-4.51)	EH	104/49/7	17/18/1
Banjul	Gambia	rs1734792	153341060	MECP2	cerebral malaria and severe malaria1 anaemia	rec	F	0.270172	0.74223	0.715857	1.31(0.31-5.61)	EH	1090/476/42	46/14/2
Blantyre	Malawi	rs1734792	153341060	MECP2	cerebral malaria and severe malaria1 anaemia	rec	F	0.167911	0.480437	0.726716	1.18(0.46-3.03)	H	620/495/77	41/24/5
Buea	Cameroon	rs1734792	153341060	MECP2	cerebral malaria and severe malaria1 anaemia	rec	F	-16.9673	6435.82	0.997896	0(0-Inf)	EH	97/55/7	2000-01-02
Ho_Chi_Minh_City	VietNam	rs1734792	153341060	MECP2	cerebral malaria and severe malaria1 anaemia	rec	F	0.609191	0.838917	0.467739	1.84(0.36-9.52)	E	54/445/651	2005-01-01
Ibadan	Nigeria	rs1734792	153341060	MECP2	cerebral malaria and severe malaria1 anaemia	rec	F	-3.70414e-16	162000	1	1(0-Inf)	EH	2002-12-08	0/0/0
Kilifi	Kenya	rs1734792	153341060	MECP2	cerebral malaria and severe malaria1 anaemia	rec	F	-0.807968	0.520508	0.120598	0.45(0.16-1.24)	EH	928/842/155	56/46/4
Kumasi	Ghana	rs1734792	153341060	MECP2	cerebral malaria and severe malaria1 anaemia	rec	F	0.328714	0.758996	0.664949	1.39(0.31-6.15)	EH	526/380/75	2002-06-17
Madang	PapuaNewGuinea	rs1734792	153341060	MECP2	cerebral malaria and severe malaria1 anaemia	rec	F	-15.8284	4809.34	0.997374	0(0-Inf)	E	80/27/5	2000-02-03
Moshi	Tanzania	rs1734792	153341060	MECP2	cerebral malaria and severe malaria1 anaemia	rec	F	-0.326399	1.07683	0.761806	0.72(0.09-5.95)	EH	114/112/23	2001-05-09
Noguchi	Ghana	rs1734792	153341060	MECP2	cerebral malaria and severe malaria1 anaemia	rec	F	-16.2638	2772.25	0.995319	0(0-Inf)	EH	40/39/5	2000-03-04
Ougadougou	BurkinaFaso	rs1734792	153341060	MECP2	cerebral malaria and severe malaria1 anaemia	rec	F	0.90624	1.09318	0.407106	2.47(0.29-21.09)	H	196/133/15	2001-02-06
All	All	rs1734792	153341060	MECP2	cerebral malaria and severe malaria1 anaemia	rec	F	-0.14949	0.244412	0.540781	0.86(0.53-1.39)	EH	3857/3065/1064	202/122/21
Bamako	Mali	rs1734792	153341060	MECP2	cerebral malaria and severe malaria1 anaemia	dom	F	0.714685	0.399662	0.0737404	2.04(0.93-4.47)	EH	104/49/7	17/18/1
Banjul	Gambia	rs1734792	153341060	MECP2	cerebral malaria and severe malaria1 anaemia	dom	F	-0.277435	0.297085	0.350377	0.76(0.42-1.36)	EH	1090/476/42	46/14/2
Blantyre	Malawi	rs1734792	153341060	MECP2	cerebral malaria and severe malaria1 anaemia	dom	F	-0.257723	0.249839	0.302281	0.77(0.47-1.26)	H	620/495/77	41/24/5
Buea	Cameroon	rs1734792	153341060	MECP2	cerebral malaria and severe malaria1 anaemia	dom	F	-0.500384	1.24229	0.687102	0.61(0.05-6.92)	EH	97/55/7	2000-01-02
Ho_Chi_Minh_City	VietNam	rs1734792	153341060	MECP2	cerebral malaria and severe malaria1 anaemia	dom	F	-1.23644	1.08979	0.256555	0.29(0.03-2.46)	E	54/445/651	2005-01-01
Ibadan	Nigeria	rs1734792	153341060	MECP2	cerebral malaria and severe malaria1 anaemia	dom	F	2.35903e-15	97139.4	1	1(0-Inf)	EH	2002-12-08	0/0/0
Kilifi	Kenya	rs1734792	153341060	MECP2	cerebral malaria and severe malaria1 anaemia	dom	F	-0.140397	0.203077	0.489346	0.87(0.58-1.29)	EH	928/842/155	56/46/4
Kumasi	Ghana	rs1734792	153341060	MECP2	cerebral malaria and severe malaria1 anaemia	dom	F	-0.501638	0.474905	0.290835	0.61(0.24-1.54)	EH	526/380/75	2002-06-17
Madang	PapuaNewGuinea	rs1734792	153341060	MECP2	cerebral malaria and severe malaria1 anaemia	dom	F	18.7675	3546.24	0.995777	141453920.66(0-Inf)	E	80/27/5	2000-02-03
Moshi	Tanzania	rs1734792	153341060	MECP2	cerebral malaria and severe malaria1 anaemia	dom	F	-0.584996	0.553471	0.290531	0.56(0.19-1.65)	EH	114/112/23	2001-05-09
Noguchi	Ghana	rs1734792	153341060	MECP2	cerebral malaria and severe malaria1 anaemia	dom	F	-0.0385074	0.831935	0.963082	0.96(0.19-4.91)	EH	40/39/5	2000-03-04
Ougadougou	BurkinaFaso	rs1734792	153341060	MECP2	cerebral malaria and severe malaria1 anaemia	dom	F	-0.487295	0.71621	0.496264	0.61(0.15-2.5)	H	196/133/15	2001-02-06
All	All	rs1734792	153341060	MECP2	cerebral malaria and severe malaria1 anaemia	dom	F	-0.157766	0.118132	0.181713	0.85(0.68-1.08)	EH	3857/3065/1064	202/122/21
Bamako	Mali	rs1734792	153341060	MECP2	cerebral malaria and severe malaria1 anaemia	het	F	0.843015	0.402992	0.0364486	2.32(1.05-5.12)	EH	104/49/7	17/18/1
Banjul	Gambia	rs1734792	153341060	MECP2	cerebral malaria and severe malaria1 anaemia	het	F	-0.335858	0.310585	0.279532	0.71(0.39-1.31)	EH	1090/476/42	46/14/2
Blantyre	Malawi	rs1734792	153341060	MECP2	cerebral malaria and severe malaria1 anaemia	het	F	-0.314722	0.258933	0.224192	0.73(0.44-1.21)	H	620/495/77	41/24/5
Buea	Cameroon	rs1734792	153341060	MECP2	cerebral malaria and severe malaria1 anaemia	het	F	-0.23837	1.24355	0.847988	0.79(0.07-9.02)	EH	97/55/7	2000-01-02
Ho_Chi_Minh_City	VietNam	rs1734792	153341060	MECP2	cerebral malaria and severe malaria1 anaemia	het	F	-1.29224	1.08194	0.232331	0.27(0.03-2.29)	E	54/445/651	2005-01-01
Ibadan	Nigeria	rs1734792	153341060	MECP2	cerebral malaria and severe malaria1 anaemia	het	F	1.03253e-16	95027.4	1	1(0-Inf)	EH	2002-12-08	0/0/0
Kilifi	Kenya	rs1734792	153341060	MECP2	cerebral malaria and severe malaria1 anaemia	het	F	0.0335042	0.204579	0.869911	1.03(0.69-1.54)	EH	928/842/155	56/46/4
Kumasi	Ghana	rs1734792	153341060	MECP2	cerebral malaria and severe malaria1 anaemia	het	F	-0.676986	0.521493	0.194229	0.51(0.18-1.41)	EH	526/380/75	2002-06-17
Madang	PapuaNewGuinea	rs1734792	153341060	MECP2	cerebral malaria and severe malaria1 anaemia	het	F	18.9654	3421.99	0.995578	172419062.63(0-Inf)	E	80/27/5	2000-02-03
Moshi	Tanzania	rs1734792	153341060	MECP2	cerebral malaria and severe malaria1 anaemia	het	F	-0.509555	0.572362	0.373323	0.6(0.2-1.84)	EH	114/112/23	2001-05-09
Noguchi	Ghana	rs1734792	153341060	MECP2	cerebral malaria and severe malaria1 anaemia	het	F	0.251586	0.842145	0.765136	1.29(0.25-6.7)	EH	40/39/5	2000-03-04
Ougadougou	BurkinaFaso	rs1734792	153341060	MECP2	cerebral malaria and severe malaria1 anaemia	het	F	-0.849968	0.810065	0.294059	0.43(0.09-2.09)	H	196/133/15	2001-02-06
All	All	rs1734792	153341060	MECP2	cerebral malaria and severe malaria1 anaemia	het	F	-0.12345	0.119389	0.301126	0.88(0.7-1.12)	EH	3857/3065/1064	202/122/21
Bamako	Mali	rs1734792	153341060	MECP2	cerebral malaria and severe malaria1 anaemia	dom	M	0.440798	0.430786	0.306194	1.55(0.67-3.62)	EH	126/0/41	21/0/12
Banjul	Gambia	rs1734792	153341060	MECP2	cerebral malaria and severe malaria1 anaemia	dom	M	-0.106374	0.336798	0.752125	0.9(0.46-1.74)	EH	1329/0/284	62/0/11
Blantyre	Malawi	rs1734792	153341060	MECP2	cerebral malaria and severe malaria1 anaemia	dom	M	0.599338	0.227769	0.00850468	1.82(1.17-2.85)	H	955/0/360	52/0/35
Buea	Cameroon	rs1734792	153341060	MECP2	cerebral malaria and severe malaria1 anaemia	dom	M	0.302482	1.17203	0.796342	1.35(0.14-13.46)	EH	329/0/86	3/0/1
Ho_Chi_Minh_City	VietNam	rs1734792	153341060	MECP2	cerebral malaria and severe malaria1 anaemia	dom	M	16.5906	4323.77	0.996938	16039368.96(0-Inf)	E	328/0/994	0/0/1
Ibadan	Nigeria	rs1734792	153341060	MECP2	cerebral malaria and severe malaria1 anaemia	dom	M	-1.23474e-15	137530	1	1(0-Inf)	H	14/0/3	0/0/0
Kilifi	Kenya	rs1734792	153341060	MECP2	cerebral malaria and severe malaria1 anaemia	dom	M	0.263929	0.216899	0.22367	1.3(0.85-1.99)	EH	1376/0/571	69/0/35
Kumasi	Ghana	rs1734792	153341060	MECP2	cerebral malaria and severe malaria1 anaemia	dom	M	0.605701	0.317884	0.056726	1.83(0.98-3.42)	EH	768/0/239	32/0/18
Madang	PapuaNewGuinea	rs1734792	153341060	MECP2	cerebral malaria and severe malaria1 anaemia	dom	M	1.97187	1.08464	0.0690643	7.18(0.86-60.2)	E	107/0/20	2/0/2
Moshi	Tanzania	rs1734792	153341060	MECP2	cerebral malaria and severe malaria1 anaemia	dom	M	-0.545965	0.811117	0.500882	0.58(0.12-2.84)	EH	143/0/62	10/0/3
Noguchi	Ghana	rs1734792	153341060	MECP2	cerebral malaria and severe malaria1 anaemia	dom	M	0.908809	0.828856	0.272877	2.48(0.49-12.6)	EH	78/0/24	4/0/3
Ougadougou	BurkinaFaso	rs1734792	153341060	MECP2	cerebral malaria and severe malaria1 anaemia	dom	M	0.669709	0.640565	0.295793	1.95(0.56-6.86)	H	283/0/84	7/0/4
All	All	rs1734792	153341060	MECP2	cerebral malaria and severe malaria1 anaemia	dom	M	0.38295	0.1163	0.000992063	1.47(1.17-1.84)	EH	5508/0/1774	262/0/124
Bamako	Mali	rs1734792	153341060	MECP2	other severe malaria	add	All	-0.103199	0.154243	0.503454	0.9(0.67-1.22)	SEH	230/49/48	79/13/15
Banjul	Gambia	rs1734792	153341060	MECP2	other severe malaria	add	All	-0.0300278	0.0562266	0.593307	0.97(0.87-1.08)	SEH	2419/476/326	824/136/106
Blantyre	Malawi	rs1734792	153341060	MECP2	other severe malaria	add	All	0.139243	0.0886444	0.116229	1.15(0.97-1.37)	SH	1575/495/437	128/45/46
Buea	Cameroon	rs1734792	153341060	MECP2	other severe malaria	add	All	0.0448197	0.0875773	0.60881	1.05(0.88-1.24)	SEH	426/55/93	347/68/70
Ho_Chi_Minh_City	VietNam	rs1734792	153341060	MECP2	other severe malaria	add	All	0.019881	0.0612363	0.745438	1.02(0.9-1.15)	SE	382/445/1645	102/54/385
Ibadan	Nigeria	rs1734792	153341060	MECP2	other severe malaria	add	All	-0.195862	0.280908	0.48565	0.82(0.47-1.43)	SEH	2005-12-22	46/9/9
Kilifi	Kenya	rs1734792	153341060	MECP2	other severe malaria	add	All	0.027911	0.046291	0.546545	1.03(0.94-1.13)	SEH	2304/842/726	579/194/194
Kumasi	Ghana	rs1734792	153341060	MECP2	other severe malaria	add	All	-0.0939045	0.0665979	0.158533	0.91(0.8-1.04)	SEH	1294/380/314	437/98/92
Madang	PapuaNewGuinea	rs1734792	153341060	MECP2	other severe malaria	add	All	-0.102382	0.149097	0.492287	0.9(0.67-1.21)	SE	187/27/25	173/14/22
Moshi	Tanzania	rs1734792	153341060	MECP2	other severe malaria	add	All	-0.0269707	0.117489	0.818434	0.97(0.77-1.23)	SEH	257/112/85	116/30/39
Noguchi	Ghana	rs1734792	153341060	MECP2	other severe malaria	add	All	0.0785851	0.11478	0.49356	1.08(0.86-1.35)	SEH	118/39/29	243/64/70
Ougadougou	BurkinaFaso	rs1734792	153341060	MECP2	other severe malaria	add	All	-0.0395823	0.0743195	0.594312	0.96(0.83-1.11)	SH	479/133/99	476/93/104
All	All	rs1734792	153341060	MECP2	other severe malaria	add	All	-0.00351816	0.02262	0.876401	1(0.95-1.04)	SEH	9693/3065/3832	3550/818/1152
Bamako	Mali	rs1734792	153341060	MECP2	other severe malaria	rec	All	-0.203759	0.330567	0.537636	0.82(0.43-1.56)	SEH	230/49/48	79/13/15
Banjul	Gambia	rs1734792	153341060	MECP2	other severe malaria	rec	All	-0.0145882	0.125007	0.907098	0.99(0.77-1.26)	SEH	2419/476/326	824/136/106
Blantyre	Malawi	rs1734792	153341060	MECP2	other severe malaria	rec	All	0.285681	0.186544	0.125661	1.33(0.92-1.92)	SH	1575/495/437	128/45/46
Buea	Cameroon	rs1734792	153341060	MECP2	other severe malaria	rec	All	0.188948	0.185128	0.307427	1.21(0.84-1.74)	SEH	426/55/93	347/68/70
Ho_Chi_Minh_City	VietNam	rs1734792	153341060	MECP2	other severe malaria	rec	All	0.0286293	0.107796	0.790557	1.03(0.83-1.27)	SE	382/445/1645	102/54/385
Ibadan	Nigeria	rs1734792	153341060	MECP2	other severe malaria	rec	All	-0.0543168	0.610185	0.929068	0.95(0.29-3.13)	SEH	2005-12-22	46/9/9
Kilifi	Kenya	rs1734792	153341060	MECP2	other severe malaria	rec	All	0.0879737	0.0952509	0.355695	1.09(0.91-1.32)	SEH	2304/842/726	579/194/194
Kumasi	Ghana	rs1734792	153341060	MECP2	other severe malaria	rec	All	-0.105204	0.137736	0.444981	0.9(0.69-1.18)	SEH	1294/380/314	437/98/92
Madang	PapuaNewGuinea	rs1734792	153341060	MECP2	other severe malaria	rec	All	-0.0668689	0.315697	0.832252	0.94(0.5-1.74)	SE	187/27/25	173/14/22
Moshi	Tanzania	rs1734792	153341060	MECP2	other severe malaria	rec	All	0.185101	0.234799	0.430498	1.2(0.76-1.91)	SEH	257/112/85	116/30/39
Noguchi	Ghana	rs1734792	153341060	MECP2	other severe malaria	rec	All	0.333712	0.249917	0.181781	1.4(0.86-2.28)	SEH	118/39/29	243/64/70
Ougadougou	BurkinaFaso	rs1734792	153341060	MECP2	other severe malaria	rec	All	0.0402602	0.161238	0.802823	1.04(0.76-1.43)	SH	479/133/99	476/93/104
All	All	rs1734792	153341060	MECP2	other severe malaria	rec	All	0.0574648	0.0455921	0.207521	1.06(0.97-1.16)	SEH	9693/3065/3832	3550/818/1152
Bamako	Mali	rs1734792	153341060	MECP2	other severe malaria	dom	All	-0.160147	0.253798	0.528041	0.85(0.52-1.4)	SEH	230/49/48	79/13/15
Banjul	Gambia	rs1734792	153341060	MECP2	other severe malaria	dom	All	-0.0655584	0.0867069	0.449594	0.94(0.79-1.11)	SEH	2419/476/326	824/136/106
Blantyre	Malawi	rs1734792	153341060	MECP2	other severe malaria	dom	All	0.202527	0.146445	0.166678	1.22(0.92-1.63)	SH	1575/495/437	128/45/46
Buea	Cameroon	rs1734792	153341060	MECP2	other severe malaria	dom	All	0.00801923	0.149075	0.9571	1.01(0.75-1.35)	SEH	426/55/93	347/68/70
Ho_Chi_Minh_City	VietNam	rs1734792	153341060	MECP2	other severe malaria	dom	All	0.0460213	0.127289	0.717689	1.05(0.82-1.34)	SE	382/445/1645	102/54/385
Ibadan	Nigeria	rs1734792	153341060	MECP2	other severe malaria	dom	All	-0.462247	0.455728	0.310438	0.63(0.26-1.54)	SEH	2005-12-22	46/9/9
Kilifi	Kenya	rs1734792	153341060	MECP2	other severe malaria	dom	All	0.020664	0.07697	0.788338	1.02(0.88-1.19)	SEH	2304/842/726	579/194/194
Kumasi	Ghana	rs1734792	153341060	MECP2	other severe malaria	dom	All	-0.185347	0.107263	0.0839938	0.83(0.67-1.03)	SEH	1294/380/314	437/98/92
Madang	PapuaNewGuinea	rs1734792	153341060	MECP2	other severe malaria	dom	All	-0.240705	0.246493	0.328806	0.79(0.48-1.27)	SE	187/27/25	173/14/22
Moshi	Tanzania	rs1734792	153341060	MECP2	other severe malaria	dom	All	-0.199369	0.191825	0.298654	0.82(0.56-1.19)	SEH	257/112/85	116/30/39
Noguchi	Ghana	rs1734792	153341060	MECP2	other severe malaria	dom	All	0.01333	0.189698	0.943979	1.01(0.7-1.47)	SEH	118/39/29	243/64/70
Ougadougou	BurkinaFaso	rs1734792	153341060	MECP2	other severe malaria	dom	All	-0.125666	0.119961	0.29484	0.88(0.7-1.12)	SH	479/133/99	476/93/104
All	All	rs1734792	153341060	MECP2	other severe malaria	dom	All	-0.0487737	0.0379542	0.198769	0.95(0.88-1.03)	SEH	9693/3065/3832	3550/818/1152
Bamako	Mali	rs1734792	153341060	MECP2	other severe malaria	add	F	-0.235239	0.316824	0.457789	0.79(0.42-1.47)	EH	104/49/7	31/13/1
Banjul	Gambia	rs1734792	153341060	MECP2	other severe malaria	add	F	0.0651919	0.0971549	0.502214	1.07(0.88-1.29)	EH	1090/476/42	342/136/22
Blantyre	Malawi	rs1734792	153341060	MECP2	other severe malaria	add	F	0.298567	0.159152	0.0606578	1.35(0.99-1.84)	H	620/495/77	48/45/12
Buea	Cameroon	rs1734792	153341060	MECP2	other severe malaria	add	F	-0.215103	0.191069	0.260257	0.81(0.55-1.17)	EH	97/55/7	143/68/8
Ho_Chi_Minh_City	VietNam	rs1734792	153341060	MECP2	other severe malaria	add	F	0.112258	0.1595	0.481549	1.12(0.82-1.53)	E	54/445/651	4/54/80
Ibadan	Nigeria	rs1734792	153341060	MECP2	other severe malaria	add	F	-0.791239	0.510809	0.121383	0.45(0.17-1.23)	EH	2002-12-08	2001-09-15
Kilifi	Kenya	rs1734792	153341060	MECP2	other severe malaria	add	F	-0.0163209	0.0829136	0.843951	0.98(0.84-1.16)	EH	928/842/155	231/194/40
Kumasi	Ghana	rs1734792	153341060	MECP2	other severe malaria	add	F	-0.288388	0.118097	0.014608	0.75(0.59-0.94)	EH	526/380/75	177/98/14
Madang	PapuaNewGuinea	rs1734792	153341060	MECP2	other severe malaria	add	F	-0.0132579	0.250285	0.957755	0.99(0.6-1.61)	E	80/27/5	63/14/7
Moshi	Tanzania	rs1734792	153341060	MECP2	other severe malaria	add	F	-0.0664846	0.18731	0.722632	0.94(0.65-1.35)	EH	114/112/23	52/30/14
Noguchi	Ghana	rs1734792	153341060	MECP2	other severe malaria	add	F	-0.133584	0.222221	0.547751	0.87(0.57-1.35)	EH	40/39/5	101/64/12
Ougadougou	BurkinaFaso	rs1734792	153341060	MECP2	other severe malaria	add	F	-0.294032	0.144487	0.0418508	0.75(0.56-0.99)	H	196/133/15	183/93/9
All	All	rs1734792	153341060	MECP2	other severe malaria	add	F	-0.0588952	0.0423628	0.16445	0.94(0.87-1.02)	EH	3857/3065/1064	1390/818/220
Bamako	Mali	rs1734792	153341060	MECP2	other severe malaria	rec	F	-1.00282	1.10626	0.36467	0.37(0.04-3.21)	EH	104/49/7	31/13/1
Banjul	Gambia	rs1734792	153341060	MECP2	other severe malaria	rec	F	0.615277	0.276362	0.0259909	1.85(1.08-3.18)	EH	1090/476/42	342/136/22
Blantyre	Malawi	rs1734792	153341060	MECP2	other severe malaria	rec	F	0.685168	0.33094	0.0384178	1.98(1.04-3.8)	H	620/495/77	48/45/12
Buea	Cameroon	rs1734792	153341060	MECP2	other severe malaria	rec	F	-0.0919022	0.549729	0.867231	0.91(0.31-2.68)	EH	97/55/7	143/68/8
Ho_Chi_Minh_City	VietNam	rs1734792	153341060	MECP2	other severe malaria	rec	F	0.0822777	0.184054	0.654854	1.09(0.76-1.56)	E	54/445/651	4/54/80
Ibadan	Nigeria	rs1734792	153341060	MECP2	other severe malaria	rec	F	-0.864997	1.27088	0.496106	0.42(0.03-5.08)	EH	2002-12-08	2001-09-15
Kilifi	Kenya	rs1734792	153341060	MECP2	other severe malaria	rec	F	0.0617512	0.188777	0.743583	1.06(0.73-1.54)	EH	928/842/155	231/194/40
Kumasi	Ghana	rs1734792	153341060	MECP2	other severe malaria	rec	F	-0.464059	0.31359	0.138919	0.63(0.34-1.16)	EH	526/380/75	177/98/14
Madang	PapuaNewGuinea	rs1734792	153341060	MECP2	other severe malaria	rec	F	0.648866	0.607944	0.285831	1.91(0.58-6.3)	E	80/27/5	63/14/7
Moshi	Tanzania	rs1734792	153341060	MECP2	other severe malaria	rec	F	0.50369	0.374529	0.17867	1.65(0.79-3.45)	EH	114/112/23	52/30/14
Noguchi	Ghana	rs1734792	153341060	MECP2	other severe malaria	rec	F	0.334542	0.581816	0.565294	1.4(0.45-4.37)	EH	40/39/5	101/64/12
Ougadougou	BurkinaFaso	rs1734792	153341060	MECP2	other severe malaria	rec	F	-0.364069	0.431656	0.398991	0.69(0.3-1.62)	H	196/133/15	183/93/9
All	All	rs1734792	153341060	MECP2	other severe malaria	rec	F	0.120002	0.0940452	0.201955	1.13(0.94-1.36)	EH	3857/3065/1064	1390/818/220
Bamako	Mali	rs1734792	153341060	MECP2	other severe malaria	dom	F	-0.181742	0.371712	0.62489	0.83(0.4-1.73)	EH	104/49/7	31/13/1
Banjul	Gambia	rs1734792	153341060	MECP2	other severe malaria	dom	F	-0.00618992	0.112816	0.956244	0.99(0.8-1.24)	EH	1090/476/42	342/136/22
Blantyre	Malawi	rs1734792	153341060	MECP2	other severe malaria	dom	F	0.260404	0.204753	0.203447	1.3(0.87-1.94)	H	620/495/77	48/45/12
Buea	Cameroon	rs1734792	153341060	MECP2	other severe malaria	dom	F	-0.283367	0.22516	0.208205	0.75(0.48-1.17)	EH	97/55/7	143/68/8
Ho_Chi_Minh_City	VietNam	rs1734792	153341060	MECP2	other severe malaria	dom	F	0.476364	0.528118	0.367056	1.61(0.57-4.53)	E	54/445/651	4/54/80
Ibadan	Nigeria	rs1734792	153341060	MECP2	other severe malaria	dom	F	-0.95008	0.605118	0.116398	0.39(0.12-1.27)	EH	2002-12-08	2001-09-15
Kilifi	Kenya	rs1734792	153341060	MECP2	other severe malaria	dom	F	-0.0454714	0.105468	0.666368	0.96(0.78-1.17)	EH	928/842/155	231/194/40
Kumasi	Ghana	rs1734792	153341060	MECP2	other severe malaria	dom	F	-0.329171	0.143109	0.0214404	0.72(0.54-0.95)	EH	526/380/75	177/98/14
Madang	PapuaNewGuinea	rs1734792	153341060	MECP2	other severe malaria	dom	F	-0.220695	0.333578	0.508228	0.8(0.42-1.54)	E	80/27/5	63/14/7
Moshi	Tanzania	rs1734792	153341060	MECP2	other severe malaria	dom	F	-0.341304	0.253478	0.178148	0.71(0.43-1.17)	EH	114/112/23	52/30/14
Noguchi	Ghana	rs1734792	153341060	MECP2	other severe malaria	dom	F	-0.285339	0.276549	0.302172	0.75(0.44-1.29)	EH	40/39/5	101/64/12
Ougadougou	BurkinaFaso	rs1734792	153341060	MECP2	other severe malaria	dom	F	-0.338194	0.166357	0.0420581	0.71(0.51-0.99)	H	196/133/15	183/93/9
All	All	rs1734792	153341060	MECP2	other severe malaria	dom	F	-0.131831	0.0534122	0.0135801	0.88(0.79-0.97)	EH	3857/3065/1064	1390/818/220
Bamako	Mali	rs1734792	153341060	MECP2	other severe malaria	het	F	-0.0328116	0.381355	0.931435	0.97(0.46-2.04)	EH	104/49/7	31/13/1
Banjul	Gambia	rs1734792	153341060	MECP2	other severe malaria	het	F	-0.106109	0.117194	0.365247	0.9(0.71-1.13)	EH	1090/476/42	342/136/22
Blantyre	Malawi	rs1734792	153341060	MECP2	other severe malaria	het	F	0.0481834	0.206227	0.815262	1.05(0.7-1.57)	H	620/495/77	48/45/12
Buea	Cameroon	rs1734792	153341060	MECP2	other severe malaria	het	F	-0.282892	0.231136	0.220981	0.75(0.48-1.19)	EH	97/55/7	143/68/8
Ho_Chi_Minh_City	VietNam	rs1734792	153341060	MECP2	other severe malaria	het	F	-0.0130345	0.18605	0.944146	0.99(0.69-1.42)	E	54/445/651	4/54/80
Ibadan	Nigeria	rs1734792	153341060	MECP2	other severe malaria	het	F	-0.743913	0.599258	0.214462	0.48(0.15-1.54)	EH	2002-12-08	2001-09-15
Kilifi	Kenya	rs1734792	153341060	MECP2	other severe malaria	het	F	-0.0658231	0.106722	0.537384	0.94(0.76-1.15)	EH	928/842/155	231/194/40
Kumasi	Ghana	rs1734792	153341060	MECP2	other severe malaria	het	F	-0.232595	0.147036	0.113676	0.79(0.59-1.06)	EH	526/380/75	177/98/14
Madang	PapuaNewGuinea	rs1734792	153341060	MECP2	other severe malaria	het	F	-0.502727	0.371288	0.175734	0.6(0.29-1.25)	E	80/27/5	63/14/7
Moshi	Tanzania	rs1734792	153341060	MECP2	other severe malaria	het	F	-0.594913	0.266433	0.025557	0.55(0.33-0.93)	EH	114/112/23	52/30/14
Noguchi	Ghana	rs1734792	153341060	MECP2	other severe malaria	het	F	-0.373658	0.27912	0.180668	0.69(0.4-1.19)	EH	40/39/5	101/64/12
Ougadougou	BurkinaFaso	rs1734792	153341060	MECP2	other severe malaria	het	F	-0.29399	0.169542	0.0829141	0.75(0.53-1.04)	H	196/133/15	183/93/9
All	All	rs1734792	153341060	MECP2	other severe malaria	het	F	-0.166368	0.0530503	0.0017124	0.85(0.76-0.94)	EH	3857/3065/1064	1390/818/220
Bamako	Mali	rs1734792	153341060	MECP2	other severe malaria	dom	M	-0.0935528	0.35747	0.793547	0.91(0.45-1.84)	EH	126/0/41	48/0/14
Banjul	Gambia	rs1734792	153341060	MECP2	other severe malaria	dom	M	-0.153432	0.138016	0.266267	0.86(0.65-1.12)	EH	1329/0/284	482/0/84
Blantyre	Malawi	rs1734792	153341060	MECP2	other severe malaria	dom	M	0.139568	0.214448	0.515161	1.15(0.76-1.75)	H	955/0/360	80/0/34
Buea	Cameroon	rs1734792	153341060	MECP2	other severe malaria	dom	M	0.247496	0.196643	0.208174	1.28(0.87-1.88)	EH	329/0/86	204/0/62
Ho_Chi_Minh_City	VietNam	rs1734792	153341060	MECP2	other severe malaria	dom	M	0.00578412	0.133048	0.965324	1.01(0.77-1.31)	E	328/0/994	98/0/305
Ibadan	Nigeria	rs1734792	153341060	MECP2	other severe malaria	dom	M	0.356691	0.79094	0.65201	1.43(0.3-6.73)	EH	14/0/3	31/0/8
Kilifi	Kenya	rs1734792	153341060	MECP2	other severe malaria	dom	M	0.0922584	0.111438	0.407734	1.1(0.88-1.36)	EH	1376/0/571	348/0/154
Kumasi	Ghana	rs1734792	153341060	MECP2	other severe malaria	dom	M	0.0048633	0.156075	0.975142	1(0.74-1.36)	EH	768/0/239	260/0/78
Madang	PapuaNewGuinea	rs1734792	153341060	MECP2	other severe malaria	dom	M	-0.341418	0.378519	0.367066	0.71(0.34-1.49)	E	107/0/20	110/0/15
Moshi	Tanzania	rs1734792	153341060	MECP2	other severe malaria	dom	M	-0.0151016	0.295675	0.959266	0.99(0.55-1.76)	EH	143/0/62	64/0/25
Noguchi	Ghana	rs1734792	153341060	MECP2	other severe malaria	dom	M	0.333792	0.284955	0.241444	1.4(0.8-2.44)	EH	78/0/24	142/0/58
Ougadougou	BurkinaFaso	rs1734792	153341060	MECP2	other severe malaria	dom	M	0.108966	0.174001	0.531157	1.12(0.79-1.57)	H	283/0/84	293/0/95
All	All	rs1734792	153341060	MECP2	other severe malaria	dom	M	0.0401549	0.0531402	0.449865	1.04(0.94-1.16)	EH	5836/0/2768	2160/0/932
Bamako	Mali	rs766420	153554404	TKTL1	severe malaria	add	All	-0.0809718	0.0904635	0.370746	0.92(0.77-1.1)	SEH	82/73/172	125/86/221
Banjul	Gambia	rs766420	153554404	TKTL1	severe malaria	add	All	-0.00401882	0.0319436	0.899882	1(0.94-1.06)	SEH	1147/786/1295	840/611/997
Blantyre	Malawi	rs766420	153554404	TKTL1	severe malaria	add	All	0.0180694	0.0404225	0.654865	1.02(0.94-1.1)	SH	658/592/1286	350/312/706
Buea	Cameroon	rs766420	153554404	TKTL1	severe malaria	add	All	-0.073325	0.0693266	0.290204	0.93(0.81-1.06)	SEH	173/79/321	184/145/289
Ho_Chi_Minh_City	VietNam	rs766420	153554404	TKTL1	severe malaria	add	All	-0.0214074	0.0508691	0.673877	0.98(0.89-1.08)	SE	1582/451/451	533/87/168
Ibadan	Nigeria	rs766420	153554404	TKTL1	severe malaria	add	All	0.11483	0.253683	0.6508	1.12(0.68-1.84)	SEH	2023-04-10	1949-12-15
Kilifi	Kenya	rs766420	153554404	TKTL1	severe malaria	add	All	-0.0498334	0.0334555	0.136345	0.95(0.89-1.02)	SEH	870/818/2206	527/488/1212
Kumasi	Ghana	rs766420	153554404	TKTL1	severe malaria	add	All	-0.0291562	0.0437348	0.504989	0.97(0.89-1.06)	SEH	472/405/1092	363/304/807
Madang	PapuaNewGuinea	rs766420	153554404	TKTL1	severe malaria	add	All	0.234039	0.166257	0.159222	1.26(0.91-1.75)	SE	14/22/204	17/24/339
Moshi	Tanzania	rs766420	153554404	TKTL1	severe malaria	add	All	-0.153403	0.0844337	0.0692399	0.86(0.73-1.01)	SEH	101/106/247	123/89/213
Noguchi	Ghana	rs766420	153554404	TKTL1	severe malaria	add	All	0.0495276	0.0984964	0.615079	1.05(0.87-1.27)	SEH	57/34/105	165/127/369
Ougadougou	BurkinaFaso	rs766420	153554404	TKTL1	severe malaria	add	All	-0.0864448	0.0623005	0.165275	0.92(0.81-1.04)	SH	167/159/390	220/179/442
All	All	rs766420	153554404	TKTL1	severe malaria	add	All	-0.0277047	0.0153193	0.0705312	0.97(0.94-1)	SEH	5333/3529/7792	3462/2464/5812
Bamako	Mali	rs766420	153554404	TKTL1	severe malaria	rec	All	-0.135268	0.158708	0.394045	0.87(0.64-1.19)	SEH	82/73/172	125/86/221
Banjul	Gambia	rs766420	153554404	TKTL1	severe malaria	rec	All	-0.0408818	0.05884	0.487183	0.96(0.86-1.08)	SEH	1147/786/1295	840/611/997
Blantyre	Malawi	rs766420	153554404	TKTL1	severe malaria	rec	All	0.0449969	0.0699717	0.520177	1.05(0.91-1.2)	SH	658/592/1286	350/312/706
Buea	Cameroon	rs766420	153554404	TKTL1	severe malaria	rec	All	-0.141182	0.126603	0.264783	0.87(0.68-1.11)	SEH	173/79/321	184/145/289
Ho_Chi_Minh_City	VietNam	rs766420	153554404	TKTL1	severe malaria	rec	All	-0.0702222	0.106122	0.508155	0.93(0.76-1.15)	SE	1582/451/451	533/87/168
Ibadan	Nigeria	rs766420	153554404	TKTL1	severe malaria	rec	All	-0.0215553	0.444182	0.961295	0.98(0.41-2.34)	SEH	2023-04-10	1949-12-15
Kilifi	Kenya	rs766420	153554404	TKTL1	severe malaria	rec	All	-0.0982289	0.0567749	0.0836038	0.91(0.81-1.01)	SEH	870/818/2206	527/488/1212
Kumasi	Ghana	rs766420	153554404	TKTL1	severe malaria	rec	All	-0.0788206	0.0753286	0.295396	0.92(0.8-1.07)	SEH	472/405/1092	363/304/807
Madang	PapuaNewGuinea	rs766420	153554404	TKTL1	severe malaria	rec	All	0.392076	0.25515	0.124379	1.48(0.9-2.44)	SE	14/22/204	17/24/339
Moshi	Tanzania	rs766420	153554404	TKTL1	severe malaria	rec	All	-0.25402	0.145407	0.080645	0.78(0.58-1.03)	SEH	101/106/247	123/89/213
Noguchi	Ghana	rs766420	153554404	TKTL1	severe malaria	rec	All	0.0286105	0.173472	0.869001	1.03(0.73-1.45)	SEH	57/34/105	165/127/369
Ougadougou	BurkinaFaso	rs766420	153554404	TKTL1	severe malaria	rec	All	-0.16963	0.107774	0.1155	0.84(0.68-1.04)	SH	167/159/390	220/179/442
All	All	rs766420	153554404	TKTL1	severe malaria	rec	All	-0.0692111	0.0272337	0.0110417	0.93(0.88-0.98)	SEH	5333/3529/7792	3462/2464/5812
Bamako	Mali	rs766420	153554404	TKTL1	severe malaria	dom	All	-0.144532	0.177305	0.414981	0.87(0.61-1.23)	SEH	82/73/172	125/86/221
Banjul	Gambia	rs766420	153554404	TKTL1	severe malaria	dom	All	0.0282307	0.0598968	0.63741	1.03(0.91-1.16)	SEH	1147/786/1295	840/611/997
Blantyre	Malawi	rs766420	153554404	TKTL1	severe malaria	dom	All	0.0122308	0.0802589	0.878878	1.01(0.86-1.18)	SH	658/592/1286	350/312/706
Buea	Cameroon	rs766420	153554404	TKTL1	severe malaria	dom	All	-0.120162	0.136126	0.377383	0.89(0.68-1.16)	SEH	173/79/321	184/145/289
Ho_Chi_Minh_City	VietNam	rs766420	153554404	TKTL1	severe malaria	dom	All	-0.0154926	0.089591	0.862709	0.98(0.83-1.17)	SE	1582/451/451	533/87/168
Ibadan	Nigeria	rs766420	153554404	TKTL1	severe malaria	dom	All	0.516487	0.519173	0.319821	1.68(0.61-4.64)	SEH	2023-04-10	1949-12-15
Kilifi	Kenya	rs766420	153554404	TKTL1	severe malaria	dom	All	-0.0653955	0.0680771	0.336749	0.94(0.82-1.07)	SEH	870/818/2206	527/488/1212
Kumasi	Ghana	rs766420	153554404	TKTL1	severe malaria	dom	All	-0.0110371	0.0886404	0.900907	0.99(0.83-1.18)	SEH	472/405/1092	363/304/807
Madang	PapuaNewGuinea	rs766420	153554404	TKTL1	severe malaria	dom	All	0.328409	0.376345	0.382866	1.39(0.66-2.9)	SE	14/22/204	17/24/339
Moshi	Tanzania	rs766420	153554404	TKTL1	severe malaria	dom	All	-0.270255	0.167617	0.106889	0.76(0.55-1.06)	SEH	101/106/247	123/89/213
Noguchi	Ghana	rs766420	153554404	TKTL1	severe malaria	dom	All	0.158784	0.193052	0.410796	1.17(0.8-1.71)	SEH	57/34/105	165/127/369
Ougadougou	BurkinaFaso	rs766420	153554404	TKTL1	severe malaria	dom	All	-0.11991	0.124449	0.335284	0.89(0.7-1.13)	SH	167/159/390	220/179/442
All	All	rs766420	153554404	TKTL1	severe malaria	dom	All	-0.0217053	0.0296242	0.463749	0.98(0.92-1.04)	SEH	5333/3529/7792	3462/2464/5812
Bamako	Mali	rs766420	153554404	TKTL1	severe malaria	add	F	-0.12333	0.156189	0.42975	0.88(0.65-1.2)	EH	24/73/63	35/86/69
Banjul	Gambia	rs766420	153554404	TKTL1	severe malaria	add	F	-0.0147917	0.056274	0.792665	0.99(0.88-1.1)	EH	388/786/427	267/611/303
Blantyre	Malawi	rs766420	153554404	TKTL1	severe malaria	add	F	0.00918979	0.0715847	0.897851	1.01(0.88-1.16)	H	164/592/454	96/312/258
Buea	Cameroon	rs766420	153554404	TKTL1	severe malaria	add	F	-0.282183	0.155239	0.0691053	0.75(0.56-1.02)	EH	21/79/58	49/145/90
Ho_Chi_Minh_City	VietNam	rs766420	153554404	TKTL1	severe malaria	add	F	0.0673616	0.122621	0.582766	1.07(0.84-1.36)	E	622/451/76	106/87/15
Ibadan	Nigeria	rs766420	153554404	TKTL1	severe malaria	add	F	-0.895077	0.527075	0.0894709	0.41(0.15-1.15)	EH	2015-04-01	2015-12-04
Kilifi	Kenya	rs766420	153554404	TKTL1	severe malaria	add	F	-0.107903	0.0583378	0.0643671	0.9(0.8-1.01)	EH	218/818/893	132/488/462
Kumasi	Ghana	rs766420	153554404	TKTL1	severe malaria	add	F	-0.136646	0.0773166	0.077169	0.87(0.75-1.02)	EH	115/405/451	89/304/292
Madang	PapuaNewGuinea	rs766420	153554404	TKTL1	severe malaria	add	F	0.460198	0.296515	0.120657	1.58(0.89-2.83)	E	2/22/88	1/24/145
Moshi	Tanzania	rs766420	153554404	TKTL1	severe malaria	add	F	-0.234044	0.143669	0.103302	0.79(0.6-1.05)	EH	30/106/113	34/89/76
Noguchi	Ghana	rs766420	153554404	TKTL1	severe malaria	add	F	0.00300795	0.176971	0.986439	1(0.71-1.42)	EH	15/34/39	40/127/121
Ougadougou	BurkinaFaso	rs766420	153554404	TKTL1	severe malaria	add	F	-0.009891	0.112356	0.92985	0.99(0.79-1.23)	H	50/159/138	45/179/139
All	All	rs766420	153554404	TKTL1	severe malaria	add	F	-0.0634481	0.0277578	0.0222677	0.94(0.89-0.99)	EH	1650/3529/2815	898/2464/1985
Bamako	Mali	rs766420	153554404	TKTL1	severe malaria	rec	F	-0.172664	0.229308	0.451463	0.84(0.54-1.32)	EH	24/73/63	35/86/69
Banjul	Gambia	rs766420	153554404	TKTL1	severe malaria	rec	F	-0.0957845	0.0903363	0.289003	0.91(0.76-1.08)	EH	388/786/427	267/611/303
Blantyre	Malawi	rs766420	153554404	TKTL1	severe malaria	rec	F	0.0456124	0.100116	0.648682	1.05(0.86-1.27)	H	164/592/454	96/312/258
Buea	Cameroon	rs766420	153554404	TKTL1	severe malaria	rec	F	-0.349859	0.218019	0.108556	0.7(0.46-1.08)	EH	21/79/58	49/145/90
Ho_Chi_Minh_City	VietNam	rs766420	153554404	TKTL1	severe malaria	rec	F	0.0587794	0.296466	0.842836	1.06(0.59-1.9)	E	622/451/76	106/87/15
Ibadan	Nigeria	rs766420	153554404	TKTL1	severe malaria	rec	F	-1.24488	0.676498	0.0657421	0.29(0.08-1.08)	EH	2015-04-01	2015-12-04
Kilifi	Kenya	rs766420	153554404	TKTL1	severe malaria	rec	F	-0.152145	0.0794727	0.0555651	0.86(0.73-1)	EH	218/818/893	132/488/462
Kumasi	Ghana	rs766420	153554404	TKTL1	severe malaria	rec	F	-0.203695	0.107929	0.0591189	0.82(0.66-1.01)	EH	115/405/451	89/304/292
Madang	PapuaNewGuinea	rs766420	153554404	TKTL1	severe malaria	rec	F	0.473633	0.323534	0.143211	1.61(0.85-3.03)	E	2/22/88	1/24/145
Moshi	Tanzania	rs766420	153554404	TKTL1	severe malaria	rec	F	-0.289477	0.204105	0.15611	0.75(0.5-1.12)	EH	30/106/113	34/89/76
Noguchi	Ghana	rs766420	153554404	TKTL1	severe malaria	rec	F	-0.100267	0.253054	0.691938	0.9(0.55-1.49)	EH	15/34/39	40/127/121
Ougadougou	BurkinaFaso	rs766420	153554404	TKTL1	severe malaria	rec	F	-0.09238	0.155721	0.55302	0.91(0.67-1.24)	H	50/159/138	45/179/139
All	All	rs766420	153554404	TKTL1	severe malaria	rec	F	-0.114005	0.0404769	0.00485429	0.89(0.82-0.97)	EH	1650/3529/2815	898/2464/1985
Bamako	Mali	rs766420	153554404	TKTL1	severe malaria	dom	F	-0.15623	0.29616	0.597833	0.86(0.48-1.53)	EH	24/73/63	35/86/69
Banjul	Gambia	rs766420	153554404	TKTL1	severe malaria	dom	F	0.062398	0.093824	0.506017	1.06(0.89-1.28)	EH	388/786/427	267/611/303
Blantyre	Malawi	rs766420	153554404	TKTL1	severe malaria	dom	F	-0.0538706	0.139604	0.699585	0.95(0.72-1.25)	H	164/592/454	96/312/258
Buea	Cameroon	rs766420	153554404	TKTL1	severe malaria	dom	F	-0.386463	0.296073	0.191792	0.68(0.38-1.21)	EH	21/79/58	49/145/90
Ho_Chi_Minh_City	VietNam	rs766420	153554404	TKTL1	severe malaria	dom	F	0.0890273	0.153359	0.561567	1.09(0.81-1.48)	E	622/451/76	106/87/15
Ibadan	Nigeria	rs766420	153554404	TKTL1	severe malaria	dom	F	-1.03505	1.16381	0.373804	0.36(0.04-3.48)	EH	2015-04-01	2015-12-04
Kilifi	Kenya	rs766420	153554404	TKTL1	severe malaria	dom	F	-0.111813	0.121811	0.358661	0.89(0.7-1.14)	EH	218/818/893	132/488/462
Kumasi	Ghana	rs766420	153554404	TKTL1	severe malaria	dom	F	-0.131908	0.157706	0.402921	0.88(0.64-1.19)	EH	115/405/451	89/304/292
Madang	PapuaNewGuinea	rs766420	153554404	TKTL1	severe malaria	dom	F	1.05555	1.23268	0.391827	2.87(0.26-32.19)	E	2/22/88	1/24/145
Moshi	Tanzania	rs766420	153554404	TKTL1	severe malaria	dom	F	-0.358196	0.285031	0.208865	0.7(0.4-1.22)	EH	30/106/113	34/89/76
Noguchi	Ghana	rs766420	153554404	TKTL1	severe malaria	dom	F	0.19679	0.339434	0.562077	1.22(0.63-2.37)	EH	15/34/39	40/127/121
Ougadougou	BurkinaFaso	rs766420	153554404	TKTL1	severe malaria	dom	F	0.151508	0.223798	0.498415	1.16(0.75-1.8)	H	50/159/138	45/179/139
All	All	rs766420	153554404	TKTL1	severe malaria	dom	F	-0.0331019	0.0512598	0.51843	0.97(0.87-1.07)	EH	1650/3529/2815	898/2464/1985
Bamako	Mali	rs766420	153554404	TKTL1	severe malaria	het	F	0.0750412	0.224831	0.738556	1.08(0.69-1.67)	EH	24/73/63	35/86/69
Banjul	Gambia	rs766420	153554404	TKTL1	severe malaria	het	F	0.118958	0.0794104	0.134128	1.13(0.96-1.32)	EH	388/786/427	267/611/303
Blantyre	Malawi	rs766420	153554404	TKTL1	severe malaria	het	F	-0.0692922	0.0974897	0.47723	0.93(0.77-1.13)	H	164/592/454	96/312/258
Buea	Cameroon	rs766420	153554404	TKTL1	severe malaria	het	F	0.114747	0.206709	0.578818	1.12(0.75-1.68)	EH	21/79/58	49/145/90
Ho_Chi_Minh_City	VietNam	rs766420	153554404	TKTL1	severe malaria	het	F	0.0747918	0.154445	0.628201	1.08(0.8-1.46)	E	622/451/76	106/87/15
Ibadan	Nigeria	rs766420	153554404	TKTL1	severe malaria	het	F	1.03443	0.743259	0.163998	2.81(0.66-12.08)	EH	2015-04-01	2015-12-04
Kilifi	Kenya	rs766420	153554404	TKTL1	severe malaria	het	F	0.105127	0.0793148	0.185026	1.11(0.95-1.3)	EH	218/818/893	132/488/462
Kumasi	Ghana	rs766420	153554404	TKTL1	severe malaria	het	F	0.143491	0.107976	0.183877	1.15(0.93-1.43)	EH	115/405/451	89/304/292
Madang	PapuaNewGuinea	rs766420	153554404	TKTL1	severe malaria	het	F	-0.41497	0.33196	0.211278	0.66(0.34-1.27)	E	2/22/88	1/24/145
Moshi	Tanzania	rs766420	153554404	TKTL1	severe malaria	het	F	0.104455	0.203115	0.607065	1.11(0.75-1.65)	EH	30/106/113	34/89/76
Noguchi	Ghana	rs766420	153554404	TKTL1	severe malaria	het	F	0.210318	0.257013	0.413178	1.23(0.75-2.04)	EH	15/34/39	40/127/121
Ougadougou	BurkinaFaso	rs766420	153554404	TKTL1	severe malaria	het	F	0.158407	0.15232	0.298358	1.17(0.87-1.58)	H	50/159/138	45/179/139
All	All	rs766420	153554404	TKTL1	severe malaria	het	F	0.083008	0.0380882	0.0293049	1.09(1.01-1.17)	EH	1650/3529/2815	898/2464/1985
Bamako	Mali	rs766420	153554404	TKTL1	severe malaria	dom	M	-0.12672	0.217091	0.55941	0.88(0.58-1.35)	EH	58/0/109	90/0/152
Banjul	Gambia	rs766420	153554404	TKTL1	severe malaria	dom	M	0.00397495	0.0783759	0.959551	1(0.86-1.17)	EH	759/0/868	573/0/694
Blantyre	Malawi	rs766420	153554404	TKTL1	severe malaria	dom	M	0.0444075	0.0977984	0.649777	1.05(0.86-1.27)	H	494/0/832	254/0/448
Buea	Cameroon	rs766420	153554404	TKTL1	severe malaria	dom	M	-0.0522295	0.156178	0.73806	0.95(0.7-1.29)	EH	152/0/263	135/0/199
Ho_Chi_Minh_City	VietNam	rs766420	153554404	TKTL1	severe malaria	dom	M	-0.0896668	0.112856	0.426892	0.91(0.73-1.14)	E	960/0/375	427/0/153
Ibadan	Nigeria	rs766420	153554404	TKTL1	severe malaria	dom	M	0.947907	0.630572	0.132775	2.58(0.75-8.88)	EH	9/0/8	11/0/34
Kilifi	Kenya	rs766420	153554404	TKTL1	severe malaria	dom	M	-0.0422925	0.0811283	0.602155	0.96(0.82-1.12)	EH	652/0/1313	395/0/750
Kumasi	Ghana	rs766420	153554404	TKTL1	severe malaria	dom	M	0.0465879	0.106227	0.660973	1.05(0.85-1.29)	EH	357/0/641	274/0/515
Madang	PapuaNewGuinea	rs766420	153554404	TKTL1	severe malaria	dom	M	0.2559	0.415549	0.538018	1.29(0.57-2.92)	E	12/0/116	16/0/194
Moshi	Tanzania	rs766420	153554404	TKTL1	severe malaria	dom	M	-0.213558	0.209194	0.307321	0.81(0.54-1.22)	EH	71/0/134	89/0/137
Noguchi	Ghana	rs766420	153554404	TKTL1	severe malaria	dom	M	0.157861	0.230919	0.494215	1.17(0.74-1.84)	EH	42/0/66	125/0/248
Ougadougou	BurkinaFaso	rs766420	153554404	TKTL1	severe malaria	dom	M	-0.240116	0.149384	0.107971	0.79(0.59-1.05)	H	117/0/252	175/0/303
All	All	rs766420	153554404	TKTL1	severe malaria	dom	M	-0.023085	0.0365733	0.527911	0.98(0.91-1.05)	EH	3683/0/4977	2564/0/3827
Bamako	Mali	rs766420	153554404	TKTL1	cerebral malaria	add	All	-0.258938	0.149143	0.082534	0.77(0.58-1.03)	SEH	82/73/172	29/15/34
Banjul	Gambia	rs766420	153554404	TKTL1	cerebral malaria	add	All	0.0168678	0.0467204	0.718072	1.02(0.93-1.11)	SEH	1147/786/1295	262/199/335
Blantyre	Malawi	rs766420	153554404	TKTL1	cerebral malaria	add	All	0.0317575	0.0477177	0.505713	1.03(0.94-1.13)	SH	658/592/1286	220/191/453
Buea	Cameroon	rs766420	153554404	TKTL1	cerebral malaria	add	All	-0.245546	0.195146	0.208294	0.78(0.53-1.15)	SEH	173/79/321	2016-10-13
Ho_Chi_Minh_City	VietNam	rs766420	153554404	TKTL1	cerebral malaria	add	All	-0.0563186	0.087011	0.517465	0.95(0.8-1.12)	SE	1582/451/451	144/22/42
Ibadan	Nigeria	rs766420	153554404	TKTL1	cerebral malaria	add	All	0.256165	0.557895	0.646116	1.29(0.43-3.86)	SEH	2023-04-10	2004-01-01
Kilifi	Kenya	rs766420	153554404	TKTL1	cerebral malaria	add	All	-0.0115437	0.0460647	0.802126	0.99(0.9-1.08)	SEH	870/818/2206	205/186/503
Kumasi	Ghana	rs766420	153554404	TKTL1	cerebral malaria	add	All	-0.109032	0.0891618	0.221383	0.9(0.75-1.07)	SEH	472/405/1092	63/45/119
Madang	PapuaNewGuinea	rs766420	153554404	TKTL1	cerebral malaria	add	All	0.485285	0.57236	0.396512	1.62(0.53-4.99)	SE	14/22/204	2/0/42
Moshi	Tanzania	rs766420	153554404	TKTL1	cerebral malaria	add	All	-0.0609666	0.212024	0.773695	0.94(0.62-1.43)	SEH	101/106/247	2018-07-09
Noguchi	Ghana	rs766420	153554404	TKTL1	cerebral malaria	add	All	0.259663	0.260261	0.318423	1.3(0.78-2.16)	SEH	57/34/105	2011-08-02
Ougadougou	BurkinaFaso	rs766420	153554404	TKTL1	cerebral malaria	add	All	-0.112739	0.118336	0.340739	0.89(0.71-1.13)	SH	167/159/390	25/31/51
All	All	rs766420	153554404	TKTL1	cerebral malaria	add	All	-0.0126684	0.02348	0.589513	0.99(0.94-1.03)	SEH	5333/3529/7792	975/715/1628
Bamako	Mali	rs766420	153554404	TKTL1	cerebral malaria	rec	All	-0.485225	0.275884	0.0786118	0.62(0.36-1.06)	SEH	82/73/172	29/15/34
Banjul	Gambia	rs766420	153554404	TKTL1	cerebral malaria	rec	All	0.0136676	0.0850878	0.872386	1.01(0.86-1.2)	SEH	1147/786/1295	262/199/335
Blantyre	Malawi	rs766420	153554404	TKTL1	cerebral malaria	rec	All	0.0876207	0.0820748	0.285714	1.09(0.93-1.28)	SH	658/592/1286	220/191/453
Buea	Cameroon	rs766420	153554404	TKTL1	cerebral malaria	rec	All	-0.419246	0.345288	0.224675	0.66(0.33-1.29)	SEH	173/79/321	2016-10-13
Ho_Chi_Minh_City	VietNam	rs766420	153554404	TKTL1	cerebral malaria	rec	All	-0.186361	0.183702	0.310355	0.83(0.58-1.19)	SE	1582/451/451	144/22/42
Ibadan	Nigeria	rs766420	153554404	TKTL1	cerebral malaria	rec	All	0.121621	1.05751	0.90844	1.13(0.14-8.97)	SEH	2023-04-10	2004-01-01
Kilifi	Kenya	rs766420	153554404	TKTL1	cerebral malaria	rec	All	-0.0227737	0.0776173	0.769209	0.98(0.84-1.14)	SEH	870/818/2206	205/186/503
Kumasi	Ghana	rs766420	153554404	TKTL1	cerebral malaria	rec	All	-0.141843	0.154464	0.358465	0.87(0.64-1.17)	SEH	472/405/1092	63/45/119
Madang	PapuaNewGuinea	rs766420	153554404	TKTL1	cerebral malaria	rec	All	1.21805	0.835475	0.144865	3.38(0.66-17.38)	SE	14/22/204	2/0/42
Moshi	Tanzania	rs766420	153554404	TKTL1	cerebral malaria	rec	All	-0.100689	0.363984	0.782063	0.9(0.44-1.85)	SEH	101/106/247	2018-07-09
Noguchi	Ghana	rs766420	153554404	TKTL1	cerebral malaria	rec	All	0.00157609	0.443862	0.997167	1(0.42-2.39)	SEH	57/34/105	2011-08-02
Ougadougou	BurkinaFaso	rs766420	153554404	TKTL1	cerebral malaria	rec	All	-0.369112	0.215562	0.0868368	0.69(0.45-1.05)	SH	167/159/390	25/31/51
All	All	rs766420	153554404	TKTL1	cerebral malaria	rec	All	-0.0298915	0.0415439	0.471824	0.97(0.89-1.05)	SEH	5333/3529/7792	975/715/1628
Bamako	Mali	rs766420	153554404	TKTL1	cerebral malaria	dom	All	-0.425556	0.289173	0.141121	0.65(0.37-1.15)	SEH	82/73/172	29/15/34
Banjul	Gambia	rs766420	153554404	TKTL1	cerebral malaria	dom	All	0.0448468	0.0886142	0.612793	1.05(0.88-1.24)	SEH	1147/786/1295	262/199/335
Blantyre	Malawi	rs766420	153554404	TKTL1	cerebral malaria	dom	All	0.00955901	0.0943485	0.9193	1.01(0.84-1.21)	SH	658/592/1286	220/191/453
Buea	Cameroon	rs766420	153554404	TKTL1	cerebral malaria	dom	All	-0.430487	0.383035	0.261062	0.65(0.31-1.38)	SEH	173/79/321	2016-10-13
Ho_Chi_Minh_City	VietNam	rs766420	153554404	TKTL1	cerebral malaria	dom	All	-0.0415231	0.156854	0.791221	0.96(0.71-1.3)	SE	1582/451/451	144/22/42
Ibadan	Nigeria	rs766420	153554404	TKTL1	cerebral malaria	dom	All	0.990788	1.25005	0.428012	2.69(0.23-31.21)	SEH	2023-04-10	2004-01-01
Kilifi	Kenya	rs766420	153554404	TKTL1	cerebral malaria	dom	All	-0.0151076	0.0946635	0.873202	0.99(0.82-1.19)	SEH	870/818/2206	205/186/503
Kumasi	Ghana	rs766420	153554404	TKTL1	cerebral malaria	dom	All	-0.248352	0.177073	0.160753	0.78(0.55-1.1)	SEH	472/405/1092	63/45/119
Madang	PapuaNewGuinea	rs766420	153554404	TKTL1	cerebral malaria	dom	All	-0.0110343	0.793481	0.988905	0.99(0.21-4.68)	SE	14/22/204	2/0/42
Moshi	Tanzania	rs766420	153554404	TKTL1	cerebral malaria	dom	All	-0.109976	0.425161	0.79589	0.9(0.39-2.06)	SEH	101/106/247	2018-07-09
Noguchi	Ghana	rs766420	153554404	TKTL1	cerebral malaria	dom	All	1.27515	0.803907	0.112695	3.58(0.74-17.3)	SEH	57/34/105	2011-08-02
Ougadougou	BurkinaFaso	rs766420	153554404	TKTL1	cerebral malaria	dom	All	0.0323601	0.245547	0.895152	1.03(0.64-1.67)	SH	167/159/390	25/31/51
All	All	rs766420	153554404	TKTL1	cerebral malaria	dom	All	-0.0118671	0.0457868	0.795496	0.99(0.9-1.08)	SEH	5333/3529/7792	975/715/1628
Bamako	Mali	rs766420	153554404	TKTL1	cerebral malaria	add	F	-0.163526	0.275229	0.552416	0.85(0.5-1.46)	EH	24/73/63	6/15/11
Banjul	Gambia	rs766420	153554404	TKTL1	cerebral malaria	add	F	-0.0576929	0.0803865	0.472946	0.94(0.81-1.11)	EH	388/786/427	97/199/100
Blantyre	Malawi	rs766420	153554404	TKTL1	cerebral malaria	add	F	0.0400305	0.0832666	0.630693	1.04(0.88-1.23)	H	164/592/454	63/191/173
Buea	Cameroon	rs766420	153554404	TKTL1	cerebral malaria	add	F	-0.476835	0.364862	0.19125	0.62(0.3-1.27)	EH	21/79/58	2005-10-04
Ho_Chi_Minh_City	VietNam	rs766420	153554404	TKTL1	cerebral malaria	add	F	0.12848	0.240488	0.59317	1.14(0.71-1.82)	E	622/451/76	22/22/2
Ibadan	Nigeria	rs766420	153554404	TKTL1	cerebral malaria	add	F	-0.539072	1.13096	0.63361	0.58(0.06-5.35)	EH	2015-04-01	0/1/1
Kilifi	Kenya	rs766420	153554404	TKTL1	cerebral malaria	add	F	-0.113583	0.0796868	0.15405	0.89(0.76-1.04)	EH	218/818/893	58/186/194
Kumasi	Ghana	rs766420	153554404	TKTL1	cerebral malaria	add	F	-0.182845	0.153945	0.23494	0.83(0.62-1.13)	EH	115/405/451	17/45/51
Madang	PapuaNewGuinea	rs766420	153554404	TKTL1	cerebral malaria	add	F	17.8331	1913.89	0.992566	55569543.43(0-Inf)	E	2/22/88	0/0/19
Moshi	Tanzania	rs766420	153554404	TKTL1	cerebral malaria	add	F	0.0380636	0.36752	0.917512	1.04(0.51-2.13)	EH	30/106/113	2008-07-02
Noguchi	Ghana	rs766420	153554404	TKTL1	cerebral malaria	add	F	-0.397292	0.457071	0.38473	0.67(0.27-1.65)	EH	15/34/39	2002-08-01
Ougadougou	BurkinaFaso	rs766420	153554404	TKTL1	cerebral malaria	add	F	-0.0813601	0.227487	0.720607	0.92(0.59-1.44)	H	50/159/138	3/31/14
All	All	rs766420	153554404	TKTL1	cerebral malaria	add	F	-0.0624306	0.0420169	0.13732	0.94(0.87-1.02)	EH	1648/3507/2727	273/715/561
Bamako	Mali	rs766420	153554404	TKTL1	cerebral malaria	rec	F	-0.300748	0.419999	0.473949	0.74(0.32-1.69)	EH	24/73/63	6/15/11
Banjul	Gambia	rs766420	153554404	TKTL1	cerebral malaria	rec	F	-0.111833	0.130937	0.393049	0.89(0.69-1.16)	EH	388/786/427	97/199/100
Blantyre	Malawi	rs766420	153554404	TKTL1	cerebral malaria	rec	F	0.119853	0.115792	0.300636	1.13(0.9-1.41)	H	164/592/454	63/191/173
Buea	Cameroon	rs766420	153554404	TKTL1	cerebral malaria	rec	F	-0.576574	0.553425	0.297491	0.56(0.19-1.66)	EH	21/79/58	2005-10-04
Ho_Chi_Minh_City	VietNam	rs766420	153554404	TKTL1	cerebral malaria	rec	F	-0.431111	0.736313	0.558211	0.65(0.15-2.75)	E	622/451/76	22/22/2
Ibadan	Nigeria	rs766420	153554404	TKTL1	cerebral malaria	rec	F	-1.17865	1.52543	0.439716	0.31(0.02-6.12)	EH	2015-04-01	0/1/1
Kilifi	Kenya	rs766420	153554404	TKTL1	cerebral malaria	rec	F	-0.120022	0.109622	0.27357	0.89(0.72-1.1)	EH	218/818/893	58/186/194
Kumasi	Ghana	rs766420	153554404	TKTL1	cerebral malaria	rec	F	-0.135397	0.220784	0.539707	0.87(0.57-1.35)	EH	115/405/451	17/45/51
Madang	PapuaNewGuinea	rs766420	153554404	TKTL1	cerebral malaria	rec	F	18.0348	2054.78	0.992997	67986992.9(0-Inf)	E	2/22/88	0/0/19
Moshi	Tanzania	rs766420	153554404	TKTL1	cerebral malaria	rec	F	-0.00819721	0.521288	0.987454	0.99(0.36-2.76)	EH	30/106/113	2008-07-02
Noguchi	Ghana	rs766420	153554404	TKTL1	cerebral malaria	rec	F	-1.3058	0.82023	0.111386	0.27(0.05-1.35)	EH	15/34/39	2002-08-01
Ougadougou	BurkinaFaso	rs766420	153554404	TKTL1	cerebral malaria	rec	F	-0.521369	0.337592	0.122498	0.59(0.31-1.15)	H	50/159/138	3/31/14
All	All	rs766420	153554404	TKTL1	cerebral malaria	rec	F	-0.0866866	0.0615386	0.158937	0.92(0.81-1.03)	EH	1648/3507/2727	273/715/561
Bamako	Mali	rs766420	153554404	TKTL1	cerebral malaria	dom	F	-0.10876	0.521486	0.834794	0.9(0.32-2.49)	EH	24/73/63	6/15/11
Banjul	Gambia	rs766420	153554404	TKTL1	cerebral malaria	dom	F	-0.0413385	0.133497	0.756821	0.96(0.74-1.25)	EH	388/786/427	97/199/100
Blantyre	Malawi	rs766420	153554404	TKTL1	cerebral malaria	dom	F	-0.0815128	0.161033	0.612725	0.92(0.67-1.26)	H	164/592/454	63/191/173
Buea	Cameroon	rs766420	153554404	TKTL1	cerebral malaria	dom	F	-0.671587	0.622801	0.280885	0.51(0.15-1.73)	EH	21/79/58	2005-10-04
Ho_Chi_Minh_City	VietNam	rs766420	153554404	TKTL1	cerebral malaria	dom	F	0.286485	0.302731	0.343978	1.33(0.74-2.41)	E	622/451/76	22/22/2
Ibadan	Nigeria	rs766420	153554404	TKTL1	cerebral malaria	dom	F	16.4866	6522.64	0.997983	14456099.04(0-Inf)	EH	2015-04-01	0/1/1
Kilifi	Kenya	rs766420	153554404	TKTL1	cerebral malaria	dom	F	-0.212824	0.162934	0.191485	0.81(0.59-1.11)	EH	218/818/893	58/186/194
Kumasi	Ghana	rs766420	153554404	TKTL1	cerebral malaria	dom	F	-0.443079	0.288919	0.125134	0.64(0.36-1.13)	EH	115/405/451	17/45/51
Madang	PapuaNewGuinea	rs766420	153554404	TKTL1	cerebral malaria	dom	F	15.5851	2797.44	0.995555	5868249.85(0-Inf)	E	2/22/88	0/0/19
Moshi	Tanzania	rs766420	153554404	TKTL1	cerebral malaria	dom	F	0.188823	0.79787	0.812921	1.21(0.25-5.77)	EH	30/106/113	2008-07-02
Noguchi	Ghana	rs766420	153554404	TKTL1	cerebral malaria	dom	F	0.655045	1.11057	0.555306	1.93(0.22-16.97)	EH	15/34/39	2002-08-01
Ougadougou	BurkinaFaso	rs766420	153554404	TKTL1	cerebral malaria	dom	F	0.916291	0.617642	0.137933	2.5(0.75-8.39)	H	50/159/138	3/31/14
All	All	rs766420	153554404	TKTL1	cerebral malaria	dom	F	-0.0749295	0.0778087	0.335549	0.93(0.8-1.08)	EH	1648/3507/2727	273/715/561
Bamako	Mali	rs766420	153554404	TKTL1	cerebral malaria	het	F	0.22514	0.406317	0.57951	1.25(0.56-2.78)	EH	24/73/63	6/15/11
Banjul	Gambia	rs766420	153554404	TKTL1	cerebral malaria	het	F	0.0565182	0.114401	0.62128	1.06(0.85-1.32)	EH	388/786/427	97/199/100
Blantyre	Malawi	rs766420	153554404	TKTL1	cerebral malaria	het	F	-0.154709	0.113761	0.173848	0.86(0.69-1.07)	H	164/592/454	63/191/173
Buea	Cameroon	rs766420	153554404	TKTL1	cerebral malaria	het	F	0.134142	0.491394	0.784867	1.14(0.44-3)	EH	21/79/58	2005-10-04
Ho_Chi_Minh_City	VietNam	rs766420	153554404	TKTL1	cerebral malaria	het	F	0.378521	0.301937	0.209972	1.46(0.81-2.64)	E	622/451/76	22/22/2
Ibadan	Nigeria	rs766420	153554404	TKTL1	cerebral malaria	het	F	1.54045	1.55073	0.320531	4.67(0.22-97.5)	EH	2015-04-01	0/1/1
Kilifi	Kenya	rs766420	153554404	TKTL1	cerebral malaria	het	F	0.0282844	0.109996	0.797071	1.03(0.83-1.28)	EH	218/818/893	58/186/194
Kumasi	Ghana	rs766420	153554404	TKTL1	cerebral malaria	het	F	-0.0978893	0.2243	0.662531	0.91(0.58-1.41)	EH	115/405/451	17/45/51
Madang	PapuaNewGuinea	rs766420	153554404	TKTL1	cerebral malaria	het	F	-18.0355	2133.23	0.993254	0(0-Inf)	E	2/22/88	0/0/19
Moshi	Tanzania	rs766420	153554404	TKTL1	cerebral malaria	het	F	0.101541	0.541866	0.851354	1.11(0.38-3.2)	EH	30/106/113	2008-07-02
Noguchi	Ghana	rs766420	153554404	TKTL1	cerebral malaria	het	F	1.4173	0.720068	0.0490344	4.13(1.01-16.92)	EH	15/34/39	2002-08-01
Ougadougou	BurkinaFaso	rs766420	153554404	TKTL1	cerebral malaria	het	F	0.811069	0.322368	0.0118703	2.25(1.2-4.23)	H	50/159/138	3/31/14
All	All	rs766420	153554404	TKTL1	cerebral malaria	het	F	0.0367226	0.058276	0.528596	1.04(0.93-1.16)	EH	1648/3507/2727	273/715/561
Bamako	Mali	rs766420	153554404	TKTL1	cerebral malaria	dom	M	-0.658668	0.357539	0.0654421	0.52(0.26-1.04)	EH	58/0/109	23/0/23
Banjul	Gambia	rs766420	153554404	TKTL1	cerebral malaria	dom	M	0.0995579	0.116999	0.39481	1.1(0.88-1.39)	EH	759/0/868	165/0/235
Blantyre	Malawi	rs766420	153554404	TKTL1	cerebral malaria	dom	M	0.0555435	0.115458	0.630466	1.06(0.84-1.33)	H	494/0/832	157/0/280
Buea	Cameroon	rs766420	153554404	TKTL1	cerebral malaria	dom	M	-0.336443	0.463889	0.468288	0.71(0.29-1.77)	EH	152/0/263	9/0/11
Ho_Chi_Minh_City	VietNam	rs766420	153554404	TKTL1	cerebral malaria	dom	M	-0.184268	0.193493	0.340932	0.83(0.57-1.22)	E	960/0/375	122/0/40
Ibadan	Nigeria	rs766420	153554404	TKTL1	cerebral malaria	dom	M	0.916291	1.30384	0.482204	2.5(0.19-32.19)	H	9/0/8	1/0/3
Kilifi	Kenya	rs766420	153554404	TKTL1	cerebral malaria	dom	M	0.0689807	0.113034	0.541685	1.07(0.86-1.34)	EH	652/0/1313	147/0/309
Kumasi	Ghana	rs766420	153554404	TKTL1	cerebral malaria	dom	M	-0.15345	0.215513	0.476451	0.86(0.56-1.31)	EH	357/0/641	46/0/68
Madang	PapuaNewGuinea	rs766420	153554404	TKTL1	cerebral malaria	dom	M	-0.151346	0.825331	0.854503	0.86(0.17-4.33)	E	12/0/116	2/0/23
Moshi	Tanzania	rs766420	153554404	TKTL1	cerebral malaria	dom	M	-0.21515	0.529376	0.684432	0.81(0.29-2.28)	EH	71/0/134	7/0/10
Noguchi	Ghana	rs766420	153554404	TKTL1	cerebral malaria	dom	M	1.70911	1.07753	0.11271	5.52(0.67-45.65)	EH	42/0/66	1/0/9
Ougadougou	BurkinaFaso	rs766420	153554404	TKTL1	cerebral malaria	dom	M	-0.251834	0.294179	0.391966	0.78(0.44-1.38)	H	117/0/252	22/0/37
All	All	rs766420	153554404	TKTL1	cerebral malaria	dom	M	0.00744035	0.0568964	0.895957	1.01(0.9-1.13)	EH	3683/0/4977	702/0/1048
Bamako	Mali	rs766420	153554404	TKTL1	severe malarial anaemia	add	All	0.0277531	0.115108	0.809474	1.03(0.82-1.29)	SEH	82/73/172	44/36/100
Banjul	Gambia	rs766420	153554404	TKTL1	severe malarial anaemia	add	All	-0.0233736	0.0581143	0.687537	0.98(0.87-1.09)	SEH	1147/786/1295	163/112/185
Blantyre	Malawi	rs766420	153554404	TKTL1	severe malarial anaemia	add	All	0.0257265	0.109571	0.814368	1.03(0.83-1.27)	SH	658/592/1286	32/30/66
Buea	Cameroon	rs766420	153554404	TKTL1	severe malarial anaemia	add	All	-0.224492	0.143509	0.117745	0.8(0.6-1.06)	SEH	173/79/321	29/18/34
Ho_Chi_Minh_City	VietNam	rs766420	153554404	TKTL1	severe malarial anaemia	add	All	0.35636	0.228811	0.119365	1.43(0.91-2.24)	SE	1582/451/451	2009-07-15
Ibadan	Nigeria	rs766420	153554404	TKTL1	severe malarial anaemia	add	All	0.627355	0.815747	0.44186	1.87(0.38-9.26)	SEH	2023-04-10	1/0/6
Kilifi	Kenya	rs766420	153554404	TKTL1	severe malarial anaemia	add	All	0.0939251	0.100632	0.350637	1.1(0.9-1.34)	SEH	870/818/2206	31/33/92
Kumasi	Ghana	rs766420	153554404	TKTL1	severe malarial anaemia	add	All	0.101336	0.0645775	0.116599	1.11(0.98-1.26)	SEH	472/405/1092	112/115/318
Madang	PapuaNewGuinea	rs766420	153554404	TKTL1	severe malarial anaemia	add	All	0.481939	0.240261	0.0448668	1.62(1.01-2.59)	SE	14/22/204	2/11/103
Moshi	Tanzania	rs766420	153554404	TKTL1	severe malarial anaemia	add	All	-0.268805	0.107911	0.0127388	0.76(0.62-0.94)	SEH	101/106/247	59/33/87
Noguchi	Ghana	rs766420	153554404	TKTL1	severe malarial anaemia	add	All	0.13203	0.117961	0.263025	1.14(0.91-1.44)	SEH	57/34/105	56/43/141
Ougadougou	BurkinaFaso	rs766420	153554404	TKTL1	severe malarial anaemia	add	All	0.410141	0.257844	0.111686	1.51(0.91-2.5)	SH	167/159/390	2027-05-06
All	All	rs766420	153554404	TKTL1	severe malarial anaemia	add	All	0.028318	0.0303769	0.351222	1.03(0.97-1.09)	SEH	5333/3529/7792	550/443/1168
Bamako	Mali	rs766420	153554404	TKTL1	severe malarial anaemia	rec	All	0.013891	0.20021	0.944686	1.01(0.68-1.5)	SEH	82/73/172	44/36/100
Banjul	Gambia	rs766420	153554404	TKTL1	severe malarial anaemia	rec	All	-0.0667139	0.108238	0.537654	0.94(0.76-1.16)	SEH	1147/786/1295	163/112/185
Blantyre	Malawi	rs766420	153554404	TKTL1	severe malarial anaemia	rec	All	0.0556705	0.184824	0.763256	1.06(0.74-1.52)	SH	658/592/1286	32/30/66
Buea	Cameroon	rs766420	153554404	TKTL1	severe malarial anaemia	rec	All	-0.315424	0.259069	0.223403	0.73(0.44-1.21)	SEH	173/79/321	29/18/34
Ho_Chi_Minh_City	VietNam	rs766420	153554404	TKTL1	severe malarial anaemia	rec	All	0.739087	0.45246	0.102366	2.09(0.86-5.08)	SE	1582/451/451	2009-07-15
Ibadan	Nigeria	rs766420	153554404	TKTL1	severe malarial anaemia	rec	All	1.28794	1.43812	0.370481	3.63(0.22-60.74)	SEH	2023-04-10	1/0/6
Kilifi	Kenya	rs766420	153554404	TKTL1	severe malarial anaemia	rec	All	0.119527	0.170148	0.482375	1.13(0.81-1.57)	SEH	870/818/2206	31/33/92
Kumasi	Ghana	rs766420	153554404	TKTL1	severe malarial anaemia	rec	All	0.0982701	0.108616	0.3656	1.1(0.89-1.36)	SEH	472/405/1092	112/115/318
Madang	PapuaNewGuinea	rs766420	153554404	TKTL1	severe malarial anaemia	rec	All	0.512228	0.363733	0.159056	1.67(0.82-3.4)	SE	14/22/204	2/11/103
Moshi	Tanzania	rs766420	153554404	TKTL1	severe malarial anaemia	rec	All	-0.441712	0.190324	0.0202953	0.64(0.44-0.93)	SEH	101/106/247	59/33/87
Noguchi	Ghana	rs766420	153554404	TKTL1	severe malarial anaemia	rec	All	0.151942	0.207368	0.463731	1.16(0.78-1.75)	SEH	57/34/105	56/43/141
Ougadougou	BurkinaFaso	rs766420	153554404	TKTL1	severe malarial anaemia	rec	All	0.791319	0.387493	0.0411366	2.21(1.03-4.72)	SH	167/159/390	2027-05-06
All	All	rs766420	153554404	TKTL1	severe malarial anaemia	rec	All	0.0264325	0.0531957	0.619265	1.03(0.93-1.14)	SEH	5333/3529/7792	550/443/1168
Bamako	Mali	rs766420	153554404	TKTL1	severe malarial anaemia	dom	All	0.0912956	0.230755	0.692372	1.1(0.7-1.72)	SEH	82/73/172	44/36/100
Banjul	Gambia	rs766420	153554404	TKTL1	severe malarial anaemia	dom	All	-0.0132706	0.108765	0.90289	0.99(0.8-1.22)	SEH	1147/786/1295	163/112/185
Blantyre	Malawi	rs766420	153554404	TKTL1	severe malarial anaemia	dom	All	0.0273811	0.221622	0.901673	1.03(0.67-1.59)	SH	658/592/1286	32/30/66
Buea	Cameroon	rs766420	153554404	TKTL1	severe malarial anaemia	dom	All	-0.476508	0.274196	0.0822395	0.62(0.36-1.06)	SEH	173/79/321	29/18/34
Ho_Chi_Minh_City	VietNam	rs766420	153554404	TKTL1	severe malarial anaemia	dom	All	0.486781	0.378984	0.198989	1.63(0.77-3.42)	SE	1582/451/451	2009-07-15
Ibadan	Nigeria	rs766420	153554404	TKTL1	severe malarial anaemia	dom	All	1.0253	1.7167	0.550341	2.79(0.1-80.64)	SEH	2023-04-10	1/0/6
Kilifi	Kenya	rs766420	153554404	TKTL1	severe malarial anaemia	dom	All	0.223146	0.211247	0.290819	1.25(0.83-1.89)	SEH	870/818/2206	31/33/92
Kumasi	Ghana	rs766420	153554404	TKTL1	severe malarial anaemia	dom	All	0.283499	0.137817	0.039679	1.33(1.01-1.74)	SEH	472/405/1092	112/115/318
Madang	PapuaNewGuinea	rs766420	153554404	TKTL1	severe malarial anaemia	dom	All	1.39022	0.59399	0.0192592	4.02(1.25-12.86)	SE	14/22/204	2/11/103
Moshi	Tanzania	rs766420	153554404	TKTL1	severe malarial anaemia	dom	All	-0.499156	0.215395	0.0204823	0.61(0.4-0.93)	SEH	101/106/247	59/33/87
Noguchi	Ghana	rs766420	153554404	TKTL1	severe malarial anaemia	dom	All	0.335872	0.237356	0.157053	1.4(0.88-2.23)	SEH	57/34/105	56/43/141
Ougadougou	BurkinaFaso	rs766420	153554404	TKTL1	severe malarial anaemia	dom	All	0.453827	0.463124	0.327123	1.57(0.64-3.9)	SH	167/159/390	2027-05-06
All	All	rs766420	153554404	TKTL1	severe malarial anaemia	dom	All	0.076925	0.0605848	0.204189	1.08(0.96-1.22)	SEH	5333/3529/7792	550/443/1168
Bamako	Mali	rs766420	153554404	TKTL1	severe malarial anaemia	add	F	-0.00568674	0.202169	0.97756	0.99(0.67-1.48)	EH	24/73/63	12/36/30
Banjul	Gambia	rs766420	153554404	TKTL1	severe malarial anaemia	add	F	0.0458778	0.102818	0.655451	1.05(0.86-1.28)	EH	388/786/427	47/112/60
Blantyre	Malawi	rs766420	153554404	TKTL1	severe malarial anaemia	add	F	-0.112083	0.187604	0.550209	0.89(0.62-1.29)	H	164/592/454	11/30/23
Buea	Cameroon	rs766420	153554404	TKTL1	severe malarial anaemia	add	F	-0.0982034	0.274137	0.720173	0.91(0.53-1.55)	EH	21/79/58	7/18/15
Ho_Chi_Minh_City	VietNam	rs766420	153554404	TKTL1	severe malarial anaemia	add	F	0.458701	0.37647	0.223062	1.58(0.76-3.31)	E	622/451/76	2003-07-07
Ibadan	Nigeria	rs766420	153554404	TKTL1	severe malarial anaemia	add	F	-1.1849	0.931055	0.203145	0.31(0.05-1.9)	EH	2015-04-01	1/0/3
Kilifi	Kenya	rs766420	153554404	TKTL1	severe malarial anaemia	add	F	0.0872278	0.184958	0.637207	1.09(0.76-1.57)	EH	218/818/893	6/33/33
Kumasi	Ghana	rs766420	153554404	TKTL1	severe malarial anaemia	add	F	-0.101193	0.112988	0.370463	0.9(0.72-1.13)	EH	115/405/451	29/115/112
Madang	PapuaNewGuinea	rs766420	153554404	TKTL1	severe malarial anaemia	add	F	0.3093	0.39922	0.438481	1.36(0.62-2.98)	E	2/22/88	0/11/51
Moshi	Tanzania	rs766420	153554404	TKTL1	severe malarial anaemia	add	F	-0.266704	0.198472	0.179017	0.77(0.52-1.13)	EH	30/106/113	12/33/27
Noguchi	Ghana	rs766420	153554404	TKTL1	severe malarial anaemia	add	F	0.121593	0.226447	0.591295	1.13(0.72-1.76)	EH	15/34/39	9/43/39
Ougadougou	BurkinaFaso	rs766420	153554404	TKTL1	severe malarial anaemia	add	F	0.661876	0.381846	0.0830324	1.94(0.92-4.1)	H	50/159/138	2013-05-02
All	All	rs766420	153554404	TKTL1	severe malarial anaemia	add	F	-0.00311356	0.0544966	0.954439	1(0.9-1.11)	EH	1650/3529/2815	143/443/409
Bamako	Mali	rs766420	153554404	TKTL1	severe malarial anaemia	rec	F	-0.0614286	0.292372	0.833586	0.94(0.53-1.67)	EH	24/73/63	12/36/30
Banjul	Gambia	rs766420	153554404	TKTL1	severe malarial anaemia	rec	F	-0.00732104	0.164859	0.964579	0.99(0.72-1.37)	EH	388/786/427	47/112/60
Blantyre	Malawi	rs766420	153554404	TKTL1	severe malarial anaemia	rec	F	-0.076533	0.267538	0.774829	0.93(0.55-1.56)	H	164/592/454	11/30/23
Buea	Cameroon	rs766420	153554404	TKTL1	severe malarial anaemia	rec	F	-0.0240482	0.378335	0.949318	0.98(0.47-2.05)	EH	21/79/58	7/18/15
Ho_Chi_Minh_City	VietNam	rs766420	153554404	TKTL1	severe malarial anaemia	rec	F	0.99659	0.67373	0.139084	2.71(0.72-10.15)	E	622/451/76	2003-07-07
Ibadan	Nigeria	rs766420	153554404	TKTL1	severe malarial anaemia	rec	F	-1.17865	1.52543	0.439716	0.31(0.02-6.12)	EH	2015-04-01	1/0/3
Kilifi	Kenya	rs766420	153554404	TKTL1	severe malarial anaemia	rec	F	0.0468117	0.244709	0.848294	1.05(0.65-1.69)	EH	218/818/893	6/33/33
Kumasi	Ghana	rs766420	153554404	TKTL1	severe malarial anaemia	rec	F	-0.197512	0.158097	0.211553	0.82(0.6-1.12)	EH	115/405/451	29/115/112
Madang	PapuaNewGuinea	rs766420	153554404	TKTL1	severe malarial anaemia	rec	F	0.241116	0.428403	0.573554	1.27(0.55-2.95)	E	2/22/88	0/11/51
Moshi	Tanzania	rs766420	153554404	TKTL1	severe malarial anaemia	rec	F	-0.350101	0.284221	0.218027	0.7(0.4-1.23)	EH	30/106/113	12/33/27
Noguchi	Ghana	rs766420	153554404	TKTL1	severe malarial anaemia	rec	F	-0.00810491	0.31589	0.979531	0.99(0.53-1.84)	EH	15/34/39	9/43/39
Ougadougou	BurkinaFaso	rs766420	153554404	TKTL1	severe malarial anaemia	rec	F	0.984973	0.482606	0.041256	2.68(1.04-6.9)	H	50/159/138	2013-05-02
All	All	rs766420	153554404	TKTL1	severe malarial anaemia	rec	F	-0.0413092	0.0785957	0.599173	0.96(0.82-1.12)	EH	1650/3529/2815	143/443/409
Bamako	Mali	rs766420	153554404	TKTL1	severe malarial anaemia	dom	F	0.0887673	0.392853	0.821236	1.09(0.51-2.36)	EH	24/73/63	12/36/30
Banjul	Gambia	rs766420	153554404	TKTL1	severe malarial anaemia	dom	F	0.140774	0.177182	0.426895	1.15(0.81-1.63)	EH	388/786/427	47/112/60
Blantyre	Malawi	rs766420	153554404	TKTL1	severe malarial anaemia	dom	F	-0.262713	0.342222	0.442684	0.77(0.39-1.5)	H	164/592/454	11/30/23
Buea	Cameroon	rs766420	153554404	TKTL1	severe malarial anaemia	dom	F	-0.324189	0.520422	0.533327	0.72(0.26-2.01)	EH	21/79/58	7/18/15
Ho_Chi_Minh_City	VietNam	rs766420	153554404	TKTL1	severe malarial anaemia	dom	F	0.360812	0.510281	0.479514	1.43(0.53-3.9)	E	622/451/76	2003-07-07
Ibadan	Nigeria	rs766420	153554404	TKTL1	severe malarial anaemia	dom	F	-2.77259	1.75	0.113117	0.06(0-1.93)	EH	2015-04-01	1/0/3
Kilifi	Kenya	rs766420	153554404	TKTL1	severe malarial anaemia	dom	F	0.303967	0.434423	0.484113	1.36(0.58-3.18)	EH	218/818/893	6/33/33
Kumasi	Ghana	rs766420	153554404	TKTL1	severe malarial anaemia	dom	F	0.00657985	0.237625	0.977909	1.01(0.63-1.6)	EH	115/405/451	29/115/112
Madang	PapuaNewGuinea	rs766420	153554404	TKTL1	severe malarial anaemia	dom	F	16.9503	2797.44	0.995165	22983979.23(0-Inf)	E	2/22/88	0/11/51
Moshi	Tanzania	rs766420	153554404	TKTL1	severe malarial anaemia	dom	F	-0.367314	0.389994	0.346272	0.69(0.32-1.49)	EH	30/106/113	12/33/27
Noguchi	Ghana	rs766420	153554404	TKTL1	severe malarial anaemia	dom	F	0.522875	0.467182	0.263051	1.69(0.68-4.21)	EH	15/34/39	9/43/39
Ougadougou	BurkinaFaso	rs766420	153554404	TKTL1	severe malarial anaemia	dom	F	0.405465	0.762549	0.594918	1.5(0.34-6.69)	H	50/159/138	2013-05-02
All	All	rs766420	153554404	TKTL1	severe malarial anaemia	dom	F	0.0614301	0.104837	0.557902	1.06(0.87-1.31)	EH	1650/3529/2815	143/443/409
Bamako	Mali	rs766420	153554404	TKTL1	severe malarial anaemia	het	F	0.106098	0.28537	0.710049	1.11(0.64-1.95)	EH	24/73/63	12/36/30
Banjul	Gambia	rs766420	153554404	TKTL1	severe malarial anaemia	het	F	0.105272	0.146863	0.473495	1.11(0.83-1.48)	EH	388/786/427	47/112/60
Blantyre	Malawi	rs766420	153554404	TKTL1	severe malarial anaemia	het	F	-0.0659124	0.257357	0.797864	0.94(0.57-1.55)	H	164/592/454	11/30/23
Buea	Cameroon	rs766420	153554404	TKTL1	severe malarial anaemia	het	F	-0.130421	0.36819	0.723173	0.88(0.43-1.81)	EH	21/79/58	7/18/15
Ho_Chi_Minh_City	VietNam	rs766420	153554404	TKTL1	severe malarial anaemia	het	F	-0.0612244	0.505385	0.903577	0.94(0.35-2.53)	E	622/451/76	2003-07-07
Ibadan	Nigeria	rs766420	153554404	TKTL1	severe malarial anaemia	het	F	-16.6202	3765.85	0.996479	0(0-Inf)	EH	2015-04-01	1/0/3
Kilifi	Kenya	rs766420	153554404	TKTL1	severe malarial anaemia	het	F	0.0623682	0.245765	0.799672	1.06(0.66-1.72)	EH	218/818/893	6/33/33
Kumasi	Ghana	rs766420	153554404	TKTL1	severe malarial anaemia	het	F	0.200889	0.157147	0.201127	1.22(0.9-1.66)	EH	115/405/451	29/115/112
Madang	PapuaNewGuinea	rs766420	153554404	TKTL1	severe malarial anaemia	het	F	-0.121732	0.434348	0.779275	0.89(0.38-2.07)	E	2/22/88	0/11/51
Moshi	Tanzania	rs766420	153554404	TKTL1	severe malarial anaemia	het	F	0.166666	0.280381	0.552226	1.18(0.68-2.05)	EH	30/106/113	12/33/27
Noguchi	Ghana	rs766420	153554404	TKTL1	severe malarial anaemia	het	F	0.25453	0.316791	0.421708	1.29(0.69-2.4)	EH	15/34/39	9/43/39
Ougadougou	BurkinaFaso	rs766420	153554404	TKTL1	severe malarial anaemia	het	F	-0.888317	0.528683	0.0929098	0.41(0.15-1.16)	H	50/159/138	2013-05-02
All	All	rs766420	153554404	TKTL1	severe malarial anaemia	het	F	0.0703197	0.0753503	0.350698	1.07(0.93-1.24)	EH	1650/3529/2815	143/443/409
Bamako	Mali	rs766420	153554404	TKTL1	severe malarial anaemia	dom	M	0.135346	0.278732	0.627266	1.14(0.66-1.98)	EH	58/0/109	32/0/70
Banjul	Gambia	rs766420	153554404	TKTL1	severe malarial anaemia	dom	M	-0.13008	0.141055	0.356428	0.88(0.67-1.16)	EH	759/0/868	116/0/125
Blantyre	Malawi	rs766420	153554404	TKTL1	severe malarial anaemia	dom	M	0.192241	0.27255	0.480599	1.21(0.71-2.07)	H	494/0/832	21/0/43
Buea	Cameroon	rs766420	153554404	TKTL1	severe malarial anaemia	dom	M	-0.537358	0.341271	0.115353	0.58(0.3-1.14)	EH	152/0/263	22/0/19
Ho_Chi_Minh_City	VietNam	rs766420	153554404	TKTL1	severe malarial anaemia	dom	M	0.653007	0.544649	0.230548	1.92(0.66-5.59)	E	960/0/375	8/0/6
Ibadan	Nigeria	rs766420	153554404	TKTL1	severe malarial anaemia	dom	M	18.6616	3572.94	0.995833	127238394.65(0-Inf)	H	9/0/8	0/0/3
Kilifi	Kenya	rs766420	153554404	TKTL1	severe malarial anaemia	dom	M	0.212189	0.245165	0.386767	1.24(0.76-2)	EH	652/0/1313	25/0/59
Kumasi	Ghana	rs766420	153554404	TKTL1	severe malarial anaemia	dom	M	0.403678	0.162874	0.0131949	1.5(1.09-2.06)	EH	357/0/641	83/0/206
Madang	PapuaNewGuinea	rs766420	153554404	TKTL1	severe malarial anaemia	dom	M	1.50158	0.940638	0.110412	4.49(0.71-28.37)	E	12/0/116	2/0/52
Moshi	Tanzania	rs766420	153554404	TKTL1	severe malarial anaemia	dom	M	-0.570163	0.264323	0.0310001	0.57(0.34-0.95)	EH	71/0/134	47/0/60
Noguchi	Ghana	rs766420	153554404	TKTL1	severe malarial anaemia	dom	M	0.273802	0.273146	0.31615	1.31(0.77-2.25)	EH	42/0/66	47/0/102
Ougadougou	BurkinaFaso	rs766420	153554404	TKTL1	severe malarial anaemia	dom	M	0.481053	0.579214	0.40624	1.62(0.52-5.03)	H	117/0/252	4/0/14
All	All	rs766420	153554404	TKTL1	severe malarial anaemia	dom	M	0.0835324	0.0745501	0.262507	1.09(0.94-1.26)	EH	3674/0/4969	407/0/756
Bamako	Mali	rs766420	153554404	TKTL1	cerebral malaria and severe malaria1 anaemia	add	All	-0.0113333	0.171301	0.94725	0.99(0.71-1.38)	SEH	82/73/172	17/15/36
Banjul	Gambia	rs766420	153554404	TKTL1	cerebral malaria and severe malaria1 anaemia	add	All	-0.0715895	0.0995083	0.471875	0.93(0.77-1.13)	SEH	1147/786/1295	47/39/49
Blantyre	Malawi	rs766420	153554404	TKTL1	cerebral malaria and severe malaria1 anaemia	add	All	0.0351581	0.0961966	0.714752	1.04(0.86-1.25)	SH	658/592/1286	38/38/81
Buea	Cameroon	rs766420	153554404	TKTL1	cerebral malaria and severe malaria1 anaemia	add	All	0.171995	0.395983	0.664034	1.19(0.55-2.58)	SEH	173/79/321	2004-03-01
Ho_Chi_Minh_City	VietNam	rs766420	153554404	TKTL1	cerebral malaria and severe malaria1 anaemia	add	All	-0.355997	0.506729	0.482343	0.7(0.26-1.89)	SE	1582/451/451	2000-03-05
Ibadan	Nigeria	rs766420	153554404	TKTL1	cerebral malaria and severe malaria1 anaemia	add	All	-5.33627e-16	0.21127	1	1(0.66-1.51)	SEH	2023-04-10	0/0/0
Kilifi	Kenya	rs766420	153554404	TKTL1	cerebral malaria and severe malaria1 anaemia	add	All	-0.157007	0.0861135	0.0682644	0.85(0.72-1.01)	SEH	870/818/2206	58/46/105
Kumasi	Ghana	rs766420	153554404	TKTL1	cerebral malaria and severe malaria1 anaemia	add	All	0.190392	0.142096	0.180282	1.21(0.92-1.6)	SEH	472/405/1092	13/17/46
Madang	PapuaNewGuinea	rs766420	153554404	TKTL1	cerebral malaria and severe malaria1 anaemia	add	All	-1.14662	0.502279	0.0224403	0.32(0.12-0.85)	SE	14/22/204	2006-01-02
Moshi	Tanzania	rs766420	153554404	TKTL1	cerebral malaria and severe malaria1 anaemia	add	All	-0.0734303	0.236975	0.756663	0.93(0.58-1.48)	SEH	101/106/247	2014-08-06
Noguchi	Ghana	rs766420	153554404	TKTL1	cerebral malaria and severe malaria1 anaemia	add	All	0.164981	0.315881	0.60147	1.18(0.63-2.19)	SEH	57/34/105	2008-03-03
Ougadougou	BurkinaFaso	rs766420	153554404	TKTL1	cerebral malaria and severe malaria1 anaemia	add	All	-0.298924	0.259295	0.24898	0.74(0.45-1.23)	SH	167/159/390	2009-04-07
All	All	rs766420	153554404	TKTL1	cerebral malaria and severe malaria1 anaemia	add	All	-0.0493659	0.045369	0.276553	0.95(0.87-1.04)	SEH	5333/3529/7792	197/177/358
Bamako	Mali	rs766420	153554404	TKTL1	cerebral malaria and severe malaria1 anaemia	rec	All	-0.00824074	0.290016	0.977331	0.99(0.56-1.75)	SEH	82/73/172	17/15/36
Banjul	Gambia	rs766420	153554404	TKTL1	cerebral malaria and severe malaria1 anaemia	rec	All	-0.255055	0.190221	0.179975	0.77(0.53-1.12)	SEH	1147/786/1295	47/39/49
Blantyre	Malawi	rs766420	153554404	TKTL1	cerebral malaria and severe malaria1 anaemia	rec	All	-0.0015632	0.169879	0.992658	1(0.72-1.39)	SH	658/592/1286	38/38/81
Buea	Cameroon	rs766420	153554404	TKTL1	cerebral malaria and severe malaria1 anaemia	rec	All	-0.0368869	0.692061	0.957493	0.96(0.25-3.74)	SEH	173/79/321	2004-03-01
Ho_Chi_Minh_City	VietNam	rs766420	153554404	TKTL1	cerebral malaria and severe malaria1 anaemia	rec	All	-16.172	0.50506	5.76326e-225	0(0-0)	SE	1582/451/451	2000-03-05
Ibadan	Nigeria	rs766420	153554404	TKTL1	cerebral malaria and severe malaria1 anaemia	rec	All	2.02365e-15	0.368489	1	1(0.49-2.06)	SEH	2023-04-10	0/0/0
Kilifi	Kenya	rs766420	153554404	TKTL1	cerebral malaria and severe malaria1 anaemia	rec	All	-0.244335	0.144418	0.0906724	0.78(0.59-1.04)	SEH	870/818/2206	58/46/105
Kumasi	Ghana	rs766420	153554404	TKTL1	cerebral malaria and severe malaria1 anaemia	rec	All	0.1519	0.247912	0.540064	1.16(0.72-1.89)	SEH	472/405/1092	13/17/46
Madang	PapuaNewGuinea	rs766420	153554404	TKTL1	cerebral malaria and severe malaria1 anaemia	rec	All	-1.4136	0.935901	0.130938	0.24(0.04-1.52)	SE	14/22/204	2006-01-02
Moshi	Tanzania	rs766420	153554404	TKTL1	cerebral malaria and severe malaria1 anaemia	rec	All	-0.246306	0.384964	0.522293	0.78(0.37-1.66)	SEH	101/106/247	2014-08-06
Noguchi	Ghana	rs766420	153554404	TKTL1	cerebral malaria and severe malaria1 anaemia	rec	All	0.199623	0.544082	0.713695	1.22(0.42-3.55)	SEH	57/34/105	2008-03-03
Ougadougou	BurkinaFaso	rs766420	153554404	TKTL1	cerebral malaria and severe malaria1 anaemia	rec	All	-0.476282	0.505843	0.346418	0.62(0.23-1.67)	SH	167/159/390	2009-04-07
All	All	rs766420	153554404	TKTL1	cerebral malaria and severe malaria1 anaemia	rec	All	-0.140405	0.0792744	0.0765399	0.87(0.74-1.02)	SEH	5333/3529/7792	197/177/358
Bamako	Mali	rs766420	153554404	TKTL1	cerebral malaria and severe malaria1 anaemia	dom	All	-0.0334731	0.342207	0.922079	0.97(0.49-1.89)	SEH	82/73/172	17/15/36
Banjul	Gambia	rs766420	153554404	TKTL1	cerebral malaria and severe malaria1 anaemia	dom	All	0.00872348	0.190682	0.96351	1.01(0.69-1.47)	SEH	1147/786/1295	47/39/49
Blantyre	Malawi	rs766420	153554404	TKTL1	cerebral malaria and severe malaria1 anaemia	dom	All	0.144233	0.195005	0.459519	1.16(0.79-1.69)	SH	658/592/1286	38/38/81
Buea	Cameroon	rs766420	153554404	TKTL1	cerebral malaria and severe malaria1 anaemia	dom	All	0.877446	1.04174	0.399625	2.4(0.31-18.53)	SEH	173/79/321	2004-03-01
Ho_Chi_Minh_City	VietNam	rs766420	153554404	TKTL1	cerebral malaria and severe malaria1 anaemia	dom	All	-0.200142	0.721485	0.78147	0.82(0.2-3.37)	SE	1582/451/451	2000-03-05
Ibadan	Nigeria	rs766420	153554404	TKTL1	cerebral malaria and severe malaria1 anaemia	dom	All	-1.6589e-14	0.443168	1	1(0.42-2.38)	SEH	2023-04-10	0/0/0
Kilifi	Kenya	rs766420	153554404	TKTL1	cerebral malaria and severe malaria1 anaemia	dom	All	-0.29762	0.176377	0.0915257	0.74(0.53-1.05)	SEH	870/818/2206	58/46/105
Kumasi	Ghana	rs766420	153554404	TKTL1	cerebral malaria and severe malaria1 anaemia	dom	All	0.619214	0.331313	0.061627	1.86(0.97-3.56)	SEH	472/405/1092	13/17/46
Madang	PapuaNewGuinea	rs766420	153554404	TKTL1	cerebral malaria and severe malaria1 anaemia	dom	All	-2.55976	0.969179	0.0082622	0.08(0.01-0.52)	SE	14/22/204	2006-01-02
Moshi	Tanzania	rs766420	153554404	TKTL1	cerebral malaria and severe malaria1 anaemia	dom	All	0.0595707	0.540236	0.912197	1.06(0.37-3.06)	SEH	101/106/247	2014-08-06
Noguchi	Ghana	rs766420	153554404	TKTL1	cerebral malaria and severe malaria1 anaemia	dom	All	0.401524	0.686334	0.55853	1.49(0.39-5.74)	SEH	57/34/105	2008-03-03
Ougadougou	BurkinaFaso	rs766420	153554404	TKTL1	cerebral malaria and severe malaria1 anaemia	dom	All	-0.571663	0.466112	0.22003	0.56(0.23-1.41)	SH	167/159/390	2009-04-07
All	All	rs766420	153554404	TKTL1	cerebral malaria and severe malaria1 anaemia	dom	All	-0.0142086	0.0925434	0.877977	0.99(0.82-1.18)	SEH	5333/3529/7792	197/177/358
Bamako	Mali	rs766420	153554404	TKTL1	cerebral malaria and severe malaria1 anaemia	add	F	-0.0819673	0.281823	0.771169	0.92(0.53-1.6)	EH	24/73/63	6/15/14
Banjul	Gambia	rs766420	153554404	TKTL1	cerebral malaria and severe malaria1 anaemia	add	F	-0.124753	0.182548	0.494355	0.88(0.62-1.26)	EH	388/786/427	13/39/12
Blantyre	Malawi	rs766420	153554404	TKTL1	cerebral malaria and severe malaria1 anaemia	add	F	0.103072	0.185035	0.5775	1.11(0.77-1.59)	H	164/592/454	6/38/26
Buea	Cameroon	rs766420	153554404	TKTL1	cerebral malaria and severe malaria1 anaemia	add	F	-0.014252	0.768618	0.985206	0.99(0.22-4.45)	EH	21/79/58	0/3/1
Ho_Chi_Minh_City	VietNam	rs766420	153554404	TKTL1	cerebral malaria and severe malaria1 anaemia	add	F	-0.214826	0.65774	0.743961	0.81(0.22-2.93)	E	622/451/76	2000-03-04
Ibadan	Nigeria	rs766420	153554404	TKTL1	cerebral malaria and severe malaria1 anaemia	add	F	-6.17295e-15	91857.5	1	1(0-Inf)	EH	2015-04-01	0/0/0
Kilifi	Kenya	rs766420	153554404	TKTL1	cerebral malaria and severe malaria1 anaemia	add	F	-0.43546	0.143938	0.00248363	0.65(0.49-0.86)	EH	218/818/893	22/46/37
Kumasi	Ghana	rs766420	153554404	TKTL1	cerebral malaria and severe malaria1 anaemia	add	F	-0.309179	0.309807	0.318293	0.73(0.4-1.35)	EH	115/405/451	2/17/7
Madang	PapuaNewGuinea	rs766420	153554404	TKTL1	cerebral malaria and severe malaria1 anaemia	add	F	0.0762808	1.19128	0.948944	1.08(0.1-11.15)	E	2/22/88	0/1/4
Moshi	Tanzania	rs766420	153554404	TKTL1	cerebral malaria and severe malaria1 anaemia	add	F	-0.556626	0.375283	0.138017	0.57(0.27-1.2)	EH	30/106/113	2004-08-03
Noguchi	Ghana	rs766420	153554404	TKTL1	cerebral malaria and severe malaria1 anaemia	add	F	0.145656	0.580773	0.801971	1.16(0.37-3.61)	EH	15/34/39	2003-03-01
Ougadougou	BurkinaFaso	rs766420	153554404	TKTL1	cerebral malaria and severe malaria1 anaemia	add	F	0.141699	0.498464	0.776202	1.15(0.43-3.06)	H	50/159/138	2004-04-01
All	All	rs766420	153554404	TKTL1	cerebral malaria and severe malaria1 anaemia	add	F	-0.194633	0.0818332	0.0173874	0.82(0.7-0.97)	EH	1650/3529/2815	58/177/112
Bamako	Mali	rs766420	153554404	TKTL1	cerebral malaria and severe malaria1 anaemia	rec	F	-0.0544194	0.40583	0.893328	0.95(0.43-2.1)	EH	24/73/63	6/15/14
Banjul	Gambia	rs766420	153554404	TKTL1	cerebral malaria and severe malaria1 anaemia	rec	F	-0.500941	0.327041	0.125588	0.61(0.32-1.15)	EH	388/786/427	13/39/12
Blantyre	Malawi	rs766420	153554404	TKTL1	cerebral malaria and severe malaria1 anaemia	rec	F	-0.0245483	0.254749	0.923232	0.98(0.59-1.61)	H	164/592/454	6/38/26
Buea	Cameroon	rs766420	153554404	TKTL1	cerebral malaria and severe malaria1 anaemia	rec	F	-0.624633	1.17068	0.593641	0.54(0.05-5.31)	EH	21/79/58	0/3/1
Ho_Chi_Minh_City	VietNam	rs766420	153554404	TKTL1	cerebral malaria and severe malaria1 anaemia	rec	F	-15.4039	1991.17	0.993828	0(0-Inf)	E	622/451/76	2000-03-04
Ibadan	Nigeria	rs766420	153554404	TKTL1	cerebral malaria and severe malaria1 anaemia	rec	F	1.14631e-14	123503	1	1(0-Inf)	EH	2015-04-01	0/0/0
Kilifi	Kenya	rs766420	153554404	TKTL1	cerebral malaria and severe malaria1 anaemia	rec	F	-0.466241	0.212486	0.0282198	0.63(0.41-0.95)	EH	218/818/893	22/46/37
Kumasi	Ghana	rs766420	153554404	TKTL1	cerebral malaria and severe malaria1 anaemia	rec	F	-0.779245	0.488174	0.110434	0.46(0.18-1.19)	EH	115/405/451	2/17/7
Madang	PapuaNewGuinea	rs766420	153554404	TKTL1	cerebral malaria and severe malaria1 anaemia	rec	F	0.017585	1.26709	0.988927	1.02(0.08-12.2)	E	2/22/88	0/1/4
Moshi	Tanzania	rs766420	153554404	TKTL1	cerebral malaria and severe malaria1 anaemia	rec	F	-0.909314	0.607597	0.134504	0.4(0.12-1.33)	EH	30/106/113	2004-08-03
Noguchi	Ghana	rs766420	153554404	TKTL1	cerebral malaria and severe malaria1 anaemia	rec	F	0.05204	0.839697	0.950583	1.05(0.2-5.46)	EH	15/34/39	2003-03-01
Ougadougou	BurkinaFaso	rs766420	153554404	TKTL1	cerebral malaria and severe malaria1 anaemia	rec	F	0.142791	0.680535	0.833807	1.15(0.3-4.38)	H	50/159/138	2004-04-01
All	All	rs766420	153554404	TKTL1	cerebral malaria and severe malaria1 anaemia	rec	F	-0.347662	0.12317	0.0047632	0.71(0.55-0.9)	EH	1650/3529/2815	58/177/112
Bamako	Mali	rs766420	153554404	TKTL1	cerebral malaria and severe malaria1 anaemia	dom	F	-0.208696	0.539122	0.69868	0.81(0.28-2.33)	EH	24/73/63	6/15/14
Banjul	Gambia	rs766420	153554404	TKTL1	cerebral malaria and severe malaria1 anaemia	dom	F	0.157536	0.319731	0.622216	1.17(0.63-2.19)	EH	388/786/427	13/39/12
Blantyre	Malawi	rs766420	153554404	TKTL1	cerebral malaria and severe malaria1 anaemia	dom	F	0.532014	0.435466	0.221817	1.7(0.73-4)	H	164/592/454	6/38/26
Buea	Cameroon	rs766420	153554404	TKTL1	cerebral malaria and severe malaria1 anaemia	dom	F	16.8682	3651.48	0.996314	21171931.95(0-Inf)	EH	21/79/58	0/3/1
Ho_Chi_Minh_City	VietNam	rs766420	153554404	TKTL1	cerebral malaria and severe malaria1 anaemia	dom	F	-0.059551	0.766208	0.938049	0.94(0.21-4.23)	E	622/451/76	2000-03-04
Ibadan	Nigeria	rs766420	153554404	TKTL1	cerebral malaria and severe malaria1 anaemia	dom	F	4.48529e-15	222648	1	1(0-Inf)	EH	2015-04-01	0/0/0
Kilifi	Kenya	rs766420	153554404	TKTL1	cerebral malaria and severe malaria1 anaemia	dom	F	-0.754264	0.256553	0.00328221	0.47(0.28-0.78)	EH	218/818/893	22/46/37
Kumasi	Ghana	rs766420	153554404	TKTL1	cerebral malaria and severe malaria1 anaemia	dom	F	0.294139	0.752803	0.696	1.34(0.31-5.87)	EH	115/405/451	2/17/7
Madang	PapuaNewGuinea	rs766420	153554404	TKTL1	cerebral malaria and severe malaria1 anaemia	dom	F	14.7933	4612.2	0.997441	2658592.92(0-Inf)	E	2/22/88	0/1/4
Moshi	Tanzania	rs766420	153554404	TKTL1	cerebral malaria and severe malaria1 anaemia	dom	F	-0.56951	0.693221	0.411338	0.57(0.15-2.2)	EH	30/106/113	2004-08-03
Noguchi	Ghana	rs766420	153554404	TKTL1	cerebral malaria and severe malaria1 anaemia	dom	F	0.477528	1.20799	0.692616	1.61(0.15-17.2)	EH	15/34/39	2003-03-01
Ougadougou	BurkinaFaso	rs766420	153554404	TKTL1	cerebral malaria and severe malaria1 anaemia	dom	F	0.287682	1.07281	0.788578	1.33(0.16-10.92)	H	50/159/138	2004-04-01
All	All	rs766420	153554404	TKTL1	cerebral malaria and severe malaria1 anaemia	dom	F	-0.116758	0.154565	0.45001	0.89(0.66-1.2)	EH	1650/3529/2815	58/177/112
Bamako	Mali	rs766420	153554404	TKTL1	cerebral malaria and severe malaria1 anaemia	het	F	-0.0590548	0.402945	0.883481	0.94(0.43-2.08)	EH	24/73/63	6/15/14
Banjul	Gambia	rs766420	153554404	TKTL1	cerebral malaria and severe malaria1 anaemia	het	F	0.46756	0.263242	0.0757069	1.6(0.95-2.67)	EH	388/786/427	13/39/12
Blantyre	Malawi	rs766420	153554404	TKTL1	cerebral malaria and severe malaria1 anaemia	het	F	0.231101	0.247089	0.349637	1.26(0.78-2.04)	H	164/592/454	6/38/26
Buea	Cameroon	rs766420	153554404	TKTL1	cerebral malaria and severe malaria1 anaemia	het	F	1.1434	1.16991	0.3284	3.14(0.32-31.07)	EH	21/79/58	0/3/1
Ho_Chi_Minh_City	VietNam	rs766420	153554404	TKTL1	cerebral malaria and severe malaria1 anaemia	het	F	0.192236	0.766318	0.801925	1.21(0.27-5.44)	E	622/451/76	2000-03-04
Ibadan	Nigeria	rs766420	153554404	TKTL1	cerebral malaria and severe malaria1 anaemia	het	F	-1.00542e-15	137421	1	1(0-Inf)	EH	2015-04-01	0/0/0
Kilifi	Kenya	rs766420	153554404	TKTL1	cerebral malaria and severe malaria1 anaemia	het	F	0.054151	0.205149	0.791811	1.06(0.71-1.58)	EH	218/818/893	22/46/37
Kumasi	Ghana	rs766420	153554404	TKTL1	cerebral malaria and severe malaria1 anaemia	het	F	0.847471	0.455161	0.0626153	2.33(0.96-5.69)	EH	115/405/451	2/17/7
Madang	PapuaNewGuinea	rs766420	153554404	TKTL1	cerebral malaria and severe malaria1 anaemia	het	F	0.0542035	1.27571	0.966109	1.06(0.09-12.87)	E	2/22/88	0/1/4
Moshi	Tanzania	rs766420	153554404	TKTL1	cerebral malaria and severe malaria1 anaemia	het	F	0.53519	0.546255	0.327213	1.71(0.59-4.98)	EH	30/106/113	2004-08-03
Noguchi	Ghana	rs766420	153554404	TKTL1	cerebral malaria and severe malaria1 anaemia	het	F	0.197293	0.817488	0.809291	1.22(0.25-6.05)	EH	15/34/39	2003-03-01
Ougadougou	BurkinaFaso	rs766420	153554404	TKTL1	cerebral malaria and severe malaria1 anaemia	het	F	-0.0128481	0.680323	0.984933	0.99(0.26-3.75)	H	50/159/138	2004-04-01
All	All	rs766420	153554404	TKTL1	cerebral malaria and severe malaria1 anaemia	het	F	0.249366	0.113884	0.02855	1.28(1.03-1.6)	EH	1650/3529/2815	58/177/112
Bamako	Mali	rs766420	153554404	TKTL1	cerebral malaria and severe malaria1 anaemia	dom	M	-0.0839508	0.432778	0.846191	0.92(0.39-2.15)	EH	58/0/109	11/0/22
Banjul	Gambia	rs766420	153554404	TKTL1	cerebral malaria and severe malaria1 anaemia	dom	M	-0.0837615	0.251166	0.738764	0.92(0.56-1.5)	EH	759/0/868	34/0/37
Blantyre	Malawi	rs766420	153554404	TKTL1	cerebral malaria and severe malaria1 anaemia	dom	M	0.0171602	0.229871	0.940492	1.02(0.65-1.6)	H	494/0/832	32/0/55
Buea	Cameroon	rs766420	153554404	TKTL1	cerebral malaria and severe malaria1 anaemia	dom	M	0.562939	1.16375	0.628578	1.76(0.18-17.18)	EH	152/0/263	1/0/3
Ho_Chi_Minh_City	VietNam	rs766420	153554404	TKTL1	cerebral malaria and severe malaria1 anaemia	dom	M	-16.644	4051.22	0.996722	0(0-Inf)	E	960/0/375	1/0/0
Ibadan	Nigeria	rs766420	153554404	TKTL1	cerebral malaria and severe malaria1 anaemia	dom	M	6.71343e-16	107191	1	1(0-Inf)	H	9/0/8	0/0/0
Kilifi	Kenya	rs766420	153554404	TKTL1	cerebral malaria and severe malaria1 anaemia	dom	M	-0.00431656	0.216001	0.984056	1(0.65-1.52)	EH	652/0/1313	36/0/68
Kumasi	Ghana	rs766420	153554404	TKTL1	cerebral malaria and severe malaria1 anaemia	dom	M	0.667793	0.365423	0.0676322	1.95(0.95-3.99)	EH	357/0/641	11/0/39
Madang	PapuaNewGuinea	rs766420	153554404	TKTL1	cerebral malaria and severe malaria1 anaemia	dom	M	-2.98456	1.27371	0.0191194	0.05(0-0.61)	E	12/0/116	2/0/2
Moshi	Tanzania	rs766420	153554404	TKTL1	cerebral malaria and severe malaria1 anaemia	dom	M	0.58659	0.703402	0.404319	1.8(0.45-7.14)	EH	71/0/134	3/0/10
Noguchi	Ghana	rs766420	153554404	TKTL1	cerebral malaria and severe malaria1 anaemia	dom	M	0.485024	0.881122	0.582003	1.62(0.29-9.13)	EH	42/0/66	2/0/5
Ougadougou	BurkinaFaso	rs766420	153554404	TKTL1	cerebral malaria and severe malaria1 anaemia	dom	M	-0.954031	0.61703	0.122065	0.39(0.11-1.29)	H	117/0/252	6/0/5
All	All	rs766420	153554404	TKTL1	cerebral malaria and severe malaria1 anaemia	dom	M	0.0428429	0.113098	0.704827	1.04(0.84-1.3)	EH	2723/0/4602	138/0/246
Bamako	Mali	rs766420	153554404	TKTL1	other severe malaria	add	All	-0.160075	0.131755	0.224387	0.85(0.66-1.1)	SEH	82/73/172	35/20/51
Banjul	Gambia	rs766420	153554404	TKTL1	other severe malaria	add	All	-0.0117486	0.0414421	0.776797	0.99(0.91-1.07)	SEH	1147/786/1295	368/261/428
Blantyre	Malawi	rs766420	153554404	TKTL1	other severe malaria	add	All	-0.0536714	0.0829514	0.517617	0.95(0.81-1.12)	SH	658/592/1286	60/53/106
Buea	Cameroon	rs766420	153554404	TKTL1	other severe malaria	add	All	-0.047864	0.0735903	0.515426	0.95(0.83-1.1)	SEH	173/79/321	141/114/235
Ho_Chi_Minh_City	VietNam	rs766420	153554404	TKTL1	other severe malaria	add	All	-0.0282827	0.0587856	0.630434	0.97(0.87-1.09)	SE	1582/451/451	369/55/117
Ibadan	Nigeria	rs766420	153554404	TKTL1	other severe malaria	add	All	0.0181483	0.272125	0.946828	1.02(0.6-1.74)	SEH	2023-04-10	1939-11-13
Kilifi	Kenya	rs766420	153554404	TKTL1	other severe malaria	add	All	-0.069304	0.0439225	0.114595	0.93(0.86-1.02)	SEH	870/818/2206	233/223/512
Kumasi	Ghana	rs766420	153554404	TKTL1	other severe malaria	add	All	-0.114432	0.0561733	0.041638	0.89(0.8-1)	SEH	472/405/1092	175/127/324
Madang	PapuaNewGuinea	rs766420	153554404	TKTL1	other severe malaria	add	All	0.204021	0.190477	0.284122	1.23(0.84-1.78)	SE	14/22/204	11/12/188
Moshi	Tanzania	rs766420	153554404	TKTL1	other severe malaria	add	All	-0.0902958	0.107455	0.400735	0.91(0.74-1.13)	SEH	101/106/247	49/41/94
Noguchi	Ghana	rs766420	153554404	TKTL1	other severe malaria	add	All	-0.00307055	0.104935	0.976656	1(0.81-1.22)	SEH	57/34/105	104/73/209
Ougadougou	BurkinaFaso	rs766420	153554404	TKTL1	other severe malaria	add	All	-0.0976664	0.0650428	0.133208	0.91(0.8-1.03)	SH	167/159/390	182/139/355
All	All	rs766420	153554404	TKTL1	other severe malaria	add	All	-0.0549285	0.0199447	0.00588632	0.95(0.91-0.98)	SEH	5333/3529/7792	1740/1129/2658
Bamako	Mali	rs766420	153554404	TKTL1	other severe malaria	rec	All	-0.261357	0.237527	0.27119	0.77(0.48-1.23)	SEH	82/73/172	35/20/51
Banjul	Gambia	rs766420	153554404	TKTL1	other severe malaria	rec	All	-0.0564883	0.0765106	0.460328	0.95(0.81-1.1)	SEH	1147/786/1295	368/261/428
Blantyre	Malawi	rs766420	153554404	TKTL1	other severe malaria	rec	All	-0.101778	0.14528	0.483573	0.9(0.68-1.2)	SH	658/592/1286	60/53/106
Buea	Cameroon	rs766420	153554404	TKTL1	other severe malaria	rec	All	-0.106703	0.134127	0.426302	0.9(0.69-1.17)	SEH	173/79/321	141/114/235
Ho_Chi_Minh_City	VietNam	rs766420	153554404	TKTL1	other severe malaria	rec	All	-0.0633506	0.121951	0.603428	0.94(0.74-1.19)	SE	1582/451/451	369/55/117
Ibadan	Nigeria	rs766420	153554404	TKTL1	other severe malaria	rec	All	-0.233101	0.473089	0.62221	0.79(0.31-2)	SEH	2023-04-10	1939-11-13
Kilifi	Kenya	rs766420	153554404	TKTL1	other severe malaria	rec	All	-0.151082	0.0753183	0.0448648	0.86(0.74-1)	SEH	870/818/2206	233/223/512
Kumasi	Ghana	rs766420	153554404	TKTL1	other severe malaria	rec	All	-0.204656	0.0979424	0.0366579	0.81(0.67-0.99)	SEH	472/405/1092	175/127/324
Madang	PapuaNewGuinea	rs766420	153554404	TKTL1	other severe malaria	rec	All	0.371817	0.295119	0.207709	1.45(0.81-2.59)	SE	14/22/204	11/12/188
Moshi	Tanzania	rs766420	153554404	TKTL1	other severe malaria	rec	All	-0.15854	0.183958	0.388783	0.85(0.6-1.22)	SEH	101/106/247	49/41/94
Noguchi	Ghana	rs766420	153554404	TKTL1	other severe malaria	rec	All	-0.0215036	0.184307	0.907119	0.98(0.68-1.4)	SEH	57/34/105	104/73/209
Ougadougou	BurkinaFaso	rs766420	153554404	TKTL1	other severe malaria	rec	All	-0.180736	0.113618	0.111668	0.83(0.67-1.04)	SH	167/159/390	182/139/355
All	All	rs766420	153554404	TKTL1	other severe malaria	rec	All	-0.124439	0.0358929	0.000526378	0.88(0.82-0.95)	SEH	5333/3529/7792	1740/1129/2658
Bamako	Mali	rs766420	153554404	TKTL1	other severe malaria	dom	All	-0.300798	0.255739	0.239519	0.74(0.45-1.22)	SEH	82/73/172	35/20/51
Banjul	Gambia	rs766420	153554404	TKTL1	other severe malaria	dom	All	0.0173774	0.078177	0.824094	1.02(0.87-1.19)	SEH	1147/786/1295	368/261/428
Blantyre	Malawi	rs766420	153554404	TKTL1	other severe malaria	dom	All	-0.0795665	0.16508	0.629814	0.92(0.67-1.28)	SH	658/592/1286	60/53/106
Buea	Cameroon	rs766420	153554404	TKTL1	other severe malaria	dom	All	-0.0609294	0.144543	0.673367	0.94(0.71-1.25)	SEH	173/79/321	141/114/235
Ho_Chi_Minh_City	VietNam	rs766420	153554404	TKTL1	other severe malaria	dom	All	-0.0424491	0.104267	0.683922	0.96(0.78-1.18)	SE	1582/451/451	369/55/117
Ibadan	Nigeria	rs766420	153554404	TKTL1	other severe malaria	dom	All	0.410982	0.563223	0.465576	1.51(0.5-4.55)	SEH	2023-04-10	1939-11-13
Kilifi	Kenya	rs766420	153554404	TKTL1	other severe malaria	dom	All	-0.0710972	0.0897988	0.428513	0.93(0.78-1.11)	SEH	870/818/2206	233/223/512
Kumasi	Ghana	rs766420	153554404	TKTL1	other severe malaria	dom	All	-0.18848	0.112888	0.0949928	0.83(0.66-1.03)	SEH	472/405/1092	175/127/324
Madang	PapuaNewGuinea	rs766420	153554404	TKTL1	other severe malaria	dom	All	0.242277	0.419867	0.563917	1.27(0.56-2.9)	SE	14/22/204	11/12/188
Moshi	Tanzania	rs766420	153554404	TKTL1	other severe malaria	dom	All	-0.146189	0.216414	0.499356	0.86(0.57-1.32)	SEH	101/106/247	49/41/94
Noguchi	Ghana	rs766420	153554404	TKTL1	other severe malaria	dom	All	0.0149847	0.208744	0.942773	1.02(0.67-1.53)	SEH	57/34/105	104/73/209
Ougadougou	BurkinaFaso	rs766420	153554404	TKTL1	other severe malaria	dom	All	-0.152012	0.129269	0.23962	0.86(0.67-1.11)	SH	167/159/390	182/139/355
All	All	rs766420	153554404	TKTL1	other severe malaria	dom	All	-0.0603802	0.0384081	0.115934	0.94(0.87-1.02)	SEH	5333/3529/7792	1740/1129/2658
Bamako	Mali	rs766420	153554404	TKTL1	other severe malaria	add	F	-0.353917	0.242267	0.144056	0.7(0.44-1.13)	EH	24/73/63	11/20/14
Banjul	Gambia	rs766420	153554404	TKTL1	other severe malaria	add	F	-0.00165235	0.0740924	0.982208	1(0.86-1.15)	EH	388/786/427	110/261/131
Blantyre	Malawi	rs766420	153554404	TKTL1	other severe malaria	add	F	-0.106252	0.149426	0.477041	0.9(0.67-1.21)	H	164/592/454	16/53/36
Buea	Cameroon	rs766420	153554404	TKTL1	other severe malaria	add	F	-0.294084	0.162874	0.0709817	0.75(0.54-1.03)	EH	21/79/58	38/114/69
Ho_Chi_Minh_City	VietNam	rs766420	153554404	TKTL1	other severe malaria	add	F	0.00699481	0.148138	0.962339	1.01(0.75-1.35)	E	622/451/76	73/55/10
Ibadan	Nigeria	rs766420	153554404	TKTL1	other severe malaria	add	F	-1.01304	0.564451	0.0726956	0.36(0.12-1.1)	EH	2015-04-01	2011-11-03
Kilifi	Kenya	rs766420	153554404	TKTL1	other severe malaria	add	F	-0.0589732	0.0787134	0.453729	0.94(0.81-1.1)	EH	218/818/893	46/223/198
Kumasi	Ghana	rs766420	153554404	TKTL1	other severe malaria	add	F	-0.135999	0.100572	0.176292	0.87(0.72-1.06)	EH	115/405/451	41/127/122
Madang	PapuaNewGuinea	rs766420	153554404	TKTL1	other severe malaria	add	F	0.398121	0.34765	0.252137	1.49(0.75-2.94)	E	2/22/88	1971-12-01
Moshi	Tanzania	rs766420	153554404	TKTL1	other severe malaria	add	F	-0.224638	0.178209	0.207477	0.8(0.56-1.13)	EH	30/106/113	17/41/37
Noguchi	Ghana	rs766420	153554404	TKTL1	other severe malaria	add	F	-0.0298063	0.185104	0.872074	0.97(0.68-1.4)	EH	15/34/39	29/73/77
Ougadougou	BurkinaFaso	rs766420	153554404	TKTL1	other severe malaria	add	F	-0.0452834	0.117891	0.700894	0.96(0.76-1.2)	H	50/159/138	39/139/108
All	All	rs766420	153554404	TKTL1	other severe malaria	add	F	-0.0776786	0.0369387	0.0354738	0.93(0.86-0.99)	EH	1650/3529/2815	424/1129/884
Bamako	Mali	rs766420	153554404	TKTL1	other severe malaria	rec	F	-0.388879	0.369561	0.292674	0.68(0.33-1.4)	EH	24/73/63	11/20/14
Banjul	Gambia	rs766420	153554404	TKTL1	other severe malaria	rec	F	-0.0819722	0.118988	0.49088	0.92(0.73-1.16)	EH	388/786/427	110/261/131
Blantyre	Malawi	rs766420	153554404	TKTL1	other severe malaria	rec	F	-0.149043	0.214426	0.487007	0.86(0.57-1.31)	H	164/592/454	16/53/36
Buea	Cameroon	rs766420	153554404	TKTL1	other severe malaria	rec	F	-0.391601	0.229992	0.0886298	0.68(0.43-1.06)	EH	21/79/58	38/114/69
Ho_Chi_Minh_City	VietNam	rs766420	153554404	TKTL1	other severe malaria	rec	F	0.0549877	0.354261	0.876649	1.06(0.53-2.12)	E	622/451/76	73/55/10
Ibadan	Nigeria	rs766420	153554404	TKTL1	other severe malaria	rec	F	-1.42092	0.711858	0.0459265	0.24(0.06-0.97)	EH	2015-04-01	2011-11-03
Kilifi	Kenya	rs766420	153554404	TKTL1	other severe malaria	rec	F	-0.156225	0.106364	0.141895	0.86(0.69-1.05)	EH	218/818/893	46/223/198
Kumasi	Ghana	rs766420	153554404	TKTL1	other severe malaria	rec	F	-0.199046	0.142072	0.161206	0.82(0.62-1.08)	EH	115/405/451	41/127/122
Madang	PapuaNewGuinea	rs766420	153554404	TKTL1	other severe malaria	rec	F	0.46012	0.385781	0.232988	1.58(0.74-3.37)	E	2/22/88	1971-12-01
Moshi	Tanzania	rs766420	153554404	TKTL1	other severe malaria	rec	F	-0.266601	0.258218	0.301854	0.77(0.46-1.27)	EH	30/106/113	17/41/37
Noguchi	Ghana	rs766420	153554404	TKTL1	other severe malaria	rec	F	-0.0646299	0.27158	0.811899	0.94(0.55-1.6)	EH	15/34/39	29/73/77
Ougadougou	BurkinaFaso	rs766420	153554404	TKTL1	other severe malaria	rec	F	-0.11212	0.165521	0.498168	0.89(0.65-1.24)	H	50/159/138	39/139/108
All	All	rs766420	153554404	TKTL1	other severe malaria	rec	F	-0.151394	0.0543674	0.00535862	0.86(0.77-0.96)	EH	1650/3529/2815	424/1129/884
Bamako	Mali	rs766420	153554404	TKTL1	other severe malaria	dom	F	-0.606593	0.429257	0.157619	0.55(0.24-1.26)	EH	24/73/63	11/20/14
Banjul	Gambia	rs766420	153554404	TKTL1	other severe malaria	dom	F	0.086628	0.125715	0.490771	1.09(0.85-1.4)	EH	388/786/427	110/261/131
Blantyre	Malawi	rs766420	153554404	TKTL1	other severe malaria	dom	F	-0.119062	0.284737	0.675839	0.89(0.51-1.55)	H	164/592/454	16/53/36
Buea	Cameroon	rs766420	153554404	TKTL1	other severe malaria	dom	F	-0.355281	0.30682	0.246887	0.7(0.38-1.28)	EH	21/79/58	38/114/69
Ho_Chi_Minh_City	VietNam	rs766420	153554404	TKTL1	other severe malaria	dom	F	-0.00380412	0.184099	0.983514	1(0.69-1.43)	E	622/451/76	73/55/10
Ibadan	Nigeria	rs766420	153554404	TKTL1	other severe malaria	dom	F	-0.973717	1.20708	0.419857	0.38(0.04-4.02)	EH	2015-04-01	2011-11-03
Kilifi	Kenya	rs766420	153554404	TKTL1	other severe malaria	dom	F	0.130548	0.174395	0.454113	1.14(0.81-1.6)	EH	218/818/893	46/223/198
Kumasi	Ghana	rs766420	153554404	TKTL1	other severe malaria	dom	F	-0.144669	0.20423	0.478719	0.87(0.58-1.29)	EH	115/405/451	41/127/122
Madang	PapuaNewGuinea	rs766420	153554404	TKTL1	other severe malaria	dom	F	0.386122	1.23577	0.754694	1.47(0.13-16.58)	E	2/22/88	1971-12-01
Moshi	Tanzania	rs766420	153554404	TKTL1	other severe malaria	dom	F	-0.372024	0.346541	0.283031	0.69(0.35-1.36)	EH	30/106/113	17/41/37
Noguchi	Ghana	rs766420	153554404	TKTL1	other severe malaria	dom	F	0.000523529	0.361796	0.998845	1(0.49-2.03)	EH	15/34/39	29/73/77
Ougadougou	BurkinaFaso	rs766420	153554404	TKTL1	other severe malaria	dom	F	0.045523	0.232734	0.844923	1.05(0.66-1.65)	H	50/159/138	39/139/108
All	All	rs766420	153554404	TKTL1	other severe malaria	dom	F	-0.0239986	0.0680651	0.724401	0.98(0.85-1.12)	EH	1650/3529/2815	424/1129/884
Bamako	Mali	rs766420	153554404	TKTL1	other severe malaria	het	F	-0.0198493	0.35188	0.955016	0.98(0.49-1.95)	EH	24/73/63	11/20/14
Banjul	Gambia	rs766420	153554404	TKTL1	other severe malaria	het	F	0.125007	0.104814	0.233005	1.13(0.92-1.39)	EH	388/786/427	110/261/131
Blantyre	Malawi	rs766420	153554404	TKTL1	other severe malaria	het	F	0.078299	0.203927	0.701011	1.08(0.73-1.61)	H	164/592/454	16/53/36
Buea	Cameroon	rs766420	153554404	TKTL1	other severe malaria	het	F	0.165595	0.217374	0.446181	1.18(0.77-1.81)	EH	21/79/58	38/114/69
Ho_Chi_Minh_City	VietNam	rs766420	153554404	TKTL1	other severe malaria	het	F	-0.0187766	0.186122	0.919643	0.98(0.68-1.41)	E	622/451/76	73/55/10
Ibadan	Nigeria	rs766420	153554404	TKTL1	other severe malaria	het	F	1.22573	0.762954	0.108151	3.41(0.76-15.2)	EH	2015-04-01	2011-11-03
Kilifi	Kenya	rs766420	153554404	TKTL1	other severe malaria	het	F	0.204947	0.105574	0.0522275	1.23(1-1.51)	EH	218/818/893	46/223/198
Kumasi	Ghana	rs766420	153554404	TKTL1	other severe malaria	het	F	0.132703	0.142028	0.350127	1.14(0.86-1.51)	EH	115/405/451	41/127/122
Madang	PapuaNewGuinea	rs766420	153554404	TKTL1	other severe malaria	het	F	-0.451833	0.39935	0.257878	0.64(0.29-1.39)	E	2/22/88	1971-12-01
Moshi	Tanzania	rs766420	153554404	TKTL1	other severe malaria	het	F	0.069591	0.257832	0.78723	1.07(0.65-1.78)	EH	30/106/113	17/41/37
Noguchi	Ghana	rs766420	153554404	TKTL1	other severe malaria	het	F	0.0675266	0.277419	0.807688	1.07(0.62-1.84)	EH	15/34/39	29/73/77
Ougadougou	BurkinaFaso	rs766420	153554404	TKTL1	other severe malaria	het	F	0.128867	0.161531	0.424998	1.14(0.83-1.56)	H	50/159/138	39/139/108
All	All	rs766420	153554404	TKTL1	other severe malaria	het	F	0.119824	0.0507206	0.0181556	1.13(1.02-1.25)	EH	1650/3529/2815	424/1129/884
Bamako	Mali	rs766420	153554404	TKTL1	other severe malaria	dom	M	-0.197377	0.317272	0.533871	0.82(0.44-1.53)	EH	58/0/109	24/0/37
Banjul	Gambia	rs766420	153554404	TKTL1	other severe malaria	dom	M	-0.0290786	0.10113	0.7737	0.97(0.8-1.18)	EH	759/0/868	258/0/297
Blantyre	Malawi	rs766420	153554404	TKTL1	other severe malaria	dom	M	-0.0601315	0.201052	0.764875	0.94(0.63-1.4)	H	494/0/832	44/0/70
Buea	Cameroon	rs766420	153554404	TKTL1	other severe malaria	dom	M	0.0228694	0.166747	0.890912	1.02(0.74-1.42)	EH	152/0/263	103/0/166
Ho_Chi_Minh_City	VietNam	rs766420	153554404	TKTL1	other severe malaria	dom	M	-0.0794691	0.128776	0.537163	0.92(0.72-1.19)	E	960/0/375	296/0/107
Ibadan	Nigeria	rs766420	153554404	TKTL1	other severe malaria	dom	M	0.770496	0.654455	0.239072	2.16(0.6-7.79)	EH	9/0/8	10/0/28
Kilifi	Kenya	rs766420	153554404	TKTL1	other severe malaria	dom	M	-0.146845	0.106468	0.167818	0.86(0.7-1.06)	EH	652/0/1313	187/0/314
Kumasi	Ghana	rs766420	153554404	TKTL1	other severe malaria	dom	M	-0.203177	0.135485	0.13371	0.82(0.63-1.06)	EH	357/0/641	134/0/202
Madang	PapuaNewGuinea	rs766420	153554404	TKTL1	other severe malaria	dom	M	0.189071	0.45931	0.680603	1.21(0.49-2.97)	E	12/0/116	10/0/117
Moshi	Tanzania	rs766420	153554404	TKTL1	other severe malaria	dom	M	0.0140113	0.274985	0.959363	1.01(0.59-1.74)	EH	71/0/134	32/0/57
Noguchi	Ghana	rs766420	153554404	TKTL1	other severe malaria	dom	M	0.0458972	0.250441	0.85459	1.05(0.64-1.71)	EH	42/0/66	75/0/132
Ougadougou	BurkinaFaso	rs766420	153554404	TKTL1	other severe malaria	dom	M	-0.240769	0.155746	0.122127	0.79(0.58-1.07)	H	117/0/252	143/0/247
All	All	rs766420	153554404	TKTL1	other severe malaria	dom	M	-0.0913529	0.0472031	0.0529516	0.91(0.83-1)	EH	3683/0/4977	1316/0/1774
Bamako	Mali	rs915941	153626649	FAM50A	severe malaria	add	All	0.149706	0.0866582	0.0840706	1.16(0.98-1.38)	SEH	136/70/119	155/101/179
Banjul	Gambia	rs915941	153626649	FAM50A	severe malaria	add	All	-0.0684858	0.0324344	0.0347279	0.93(0.88-1)	SEH	1448/794/997	1232/540/702
Blantyre	Malawi	rs915941	153626649	FAM50A	severe malaria	add	All	0.033371	0.0387004	0.388528	1.03(0.96-1.12)	SH	951/595/1012	479/351/542
Buea	Cameroon	rs915941	153626649	FAM50A	severe malaria	add	All	0.0113691	0.0693639	0.869806	1.01(0.88-1.16)	SEH	291/80/192	281/131/182
Ho_Chi_Minh_City	VietNam	rs915941	153626649	FAM50A	severe malaria	add	All	0.0104888	0.0931317	0.910329	1.01(0.84-1.21)	SE	91/121/2274	38/22/732
Ibadan	Nigeria	rs915941	153626649	FAM50A	severe malaria	add	All	-0.514076	0.232587	0.0270873	0.6(0.38-0.94)	SEH	2017-12-11	42/12/23
Kilifi	Kenya	rs915941	153626649	FAM50A	severe malaria	add	All	-0.00795628	0.0320466	0.803924	0.99(0.93-1.06)	SEH	1374/997/1444	837/534/853
Kumasi	Ghana	rs915941	153626649	FAM50A	severe malaria	add	All	-0.05998	0.0421633	0.154862	0.94(0.87-1.02)	SEH	666/456/760	557/335/580
Madang	PapuaNewGuinea	rs915941	153626649	FAM50A	severe malaria	add	All	-0.216466	0.160664	0.177877	0.81(0.59-1.1)	SE	199/29/14	332/29/19
Moshi	Tanzania	rs915941	153626649	FAM50A	severe malaria	add	All	0.00984249	0.0823142	0.904822	1.01(0.86-1.19)	SEH	166/121/168	154/105/166
Noguchi	Ghana	rs915941	153626649	FAM50A	severe malaria	add	All	0.0419877	0.0948358	0.657953	1.04(0.87-1.26)	SEH	60/58/73	230/138/286
Ougadougou	BurkinaFaso	rs915941	153626649	FAM50A	severe malaria	add	All	0.0647579	0.05881	0.270837	1.07(0.95-1.2)	SH	266/178/272	310/170/357
All	All	rs915941	153626649	FAM50A	severe malaria	add	All	-0.0136404	0.0153758	0.375005	0.99(0.96-1.02)	SEH	5659/3511/7342	4647/2468/4621
Bamako	Mali	rs915941	153626649	FAM50A	severe malaria	rec	All	0.181452	0.16029	0.257627	1.2(0.88-1.64)	SEH	136/70/119	155/101/179
Banjul	Gambia	rs915941	153626649	FAM50A	severe malaria	rec	All	-0.0875096	0.0635852	0.168742	0.92(0.81-1.04)	SEH	1448/794/997	1232/540/702
Blantyre	Malawi	rs915941	153626649	FAM50A	severe malaria	rec	All	0.0151243	0.0713866	0.832213	1.02(0.88-1.17)	SH	951/595/1012	479/351/542
Buea	Cameroon	rs915941	153626649	FAM50A	severe malaria	rec	All	0.0445385	0.137014	0.745132	1.05(0.8-1.37)	SEH	291/80/192	281/131/182
Ho_Chi_Minh_City	VietNam	rs915941	153626649	FAM50A	severe malaria	rec	All	0.0115836	0.156316	0.940928	1.01(0.74-1.37)	SE	91/121/2274	38/22/732
Ibadan	Nigeria	rs915941	153626649	FAM50A	severe malaria	rec	All	-0.763361	0.427425	0.0741067	0.47(0.2-1.08)	SEH	2017-12-11	42/12/23
Kilifi	Kenya	rs915941	153626649	FAM50A	severe malaria	rec	All	0.0190852	0.0594591	0.748226	1.02(0.91-1.15)	SEH	1374/997/1444	837/534/853
Kumasi	Ghana	rs915941	153626649	FAM50A	severe malaria	rec	All	-0.113825	0.0786611	0.14789	0.89(0.76-1.04)	SEH	666/456/760	557/335/580
Madang	PapuaNewGuinea	rs915941	153626649	FAM50A	severe malaria	rec	All	-0.196016	0.374057	0.600259	0.82(0.39-1.71)	SE	199/29/14	332/29/19
Moshi	Tanzania	rs915941	153626649	FAM50A	severe malaria	rec	All	-0.0101082	0.151931	0.946955	0.99(0.73-1.33)	SEH	166/121/168	154/105/166
Noguchi	Ghana	rs915941	153626649	FAM50A	severe malaria	rec	All	0.237903	0.177275	0.179596	1.27(0.9-1.8)	SEH	60/58/73	230/138/286
Ougadougou	BurkinaFaso	rs915941	153626649	FAM50A	severe malaria	rec	All	0.159414	0.109755	0.146375	1.17(0.95-1.45)	SH	266/178/272	310/170/357
All	All	rs915941	153626649	FAM50A	severe malaria	rec	All	-0.0241421	0.0287341	0.400803	0.98(0.92-1.03)	SEH	5659/3511/7342	4647/2468/4621
Bamako	Mali	rs915941	153626649	FAM50A	severe malaria	dom	All	0.338067	0.161617	0.0364586	1.4(1.02-1.92)	SEH	136/70/119	155/101/179
Banjul	Gambia	rs915941	153626649	FAM50A	severe malaria	dom	All	-0.141432	0.057017	0.0131187	0.87(0.78-0.97)	SEH	1448/794/997	1232/540/702
Blantyre	Malawi	rs915941	153626649	FAM50A	severe malaria	dom	All	0.101336	0.0727396	0.163579	1.11(0.96-1.28)	SH	951/595/1012	479/351/542
Buea	Cameroon	rs915941	153626649	FAM50A	severe malaria	dom	All	-0.000409026	0.126457	0.997419	1(0.78-1.28)	SEH	291/80/192	281/131/182
Ho_Chi_Minh_City	VietNam	rs915941	153626649	FAM50A	severe malaria	dom	All	0.0296426	0.201248	0.8829	1.03(0.69-1.53)	SE	91/121/2274	38/22/732
Ibadan	Nigeria	rs915941	153626649	FAM50A	severe malaria	dom	All	-1.02292	0.451117	0.0233581	0.36(0.15-0.87)	SEH	2017-12-11	42/12/23
Kilifi	Kenya	rs915941	153626649	FAM50A	severe malaria	dom	All	-0.0462437	0.0590238	0.433348	0.95(0.85-1.07)	SEH	1374/997/1444	837/534/853
Kumasi	Ghana	rs915941	153626649	FAM50A	severe malaria	dom	All	-0.0937663	0.0783489	0.231392	0.91(0.78-1.06)	SEH	666/456/760	557/335/580
Madang	PapuaNewGuinea	rs915941	153626649	FAM50A	severe malaria	dom	All	-0.395085	0.239745	0.0993657	0.67(0.42-1.08)	SE	199/29/14	332/29/19
Moshi	Tanzania	rs915941	153626649	FAM50A	severe malaria	dom	All	0.0439984	0.152121	0.772404	1.04(0.78-1.41)	SEH	166/121/168	154/105/166
Noguchi	Ghana	rs915941	153626649	FAM50A	severe malaria	dom	All	-0.106589	0.183443	0.561209	0.9(0.63-1.29)	SEH	60/58/73	230/138/286
Ougadougou	BurkinaFaso	rs915941	153626649	FAM50A	severe malaria	dom	All	0.0660374	0.109897	0.547905	1.07(0.86-1.33)	SH	266/178/272	310/170/357
All	All	rs915941	153626649	FAM50A	severe malaria	dom	All	-0.0226942	0.0282273	0.421407	0.98(0.92-1.03)	SEH	5659/3511/7342	4647/2468/4621
Bamako	Mali	rs915941	153626649	FAM50A	severe malaria	add	F	0.129773	0.157283	0.40932	1.14(0.84-1.55)	EH	47/70/41	42/101/49
Banjul	Gambia	rs915941	153626649	FAM50A	severe malaria	add	F	-0.0546438	0.0570573	0.338213	0.95(0.85-1.06)	EH	550/794/277	452/540/193
Blantyre	Malawi	rs915941	153626649	FAM50A	severe malaria	add	F	0.0335362	0.0684424	0.62414	1.03(0.9-1.18)	H	302/595/327	149/351/172
Buea	Cameroon	rs915941	153626649	FAM50A	severe malaria	add	F	-0.0882972	0.149471	0.554701	0.92(0.68-1.23)	EH	52/80/27	99/131/45
Ho_Chi_Minh_City	VietNam	rs915941	153626649	FAM50A	severe malaria	add	F	-0.0405564	0.230315	0.860222	0.96(0.61-1.51)	E	3/121/1029	1/22/187
Ibadan	Nigeria	rs915941	153626649	FAM50A	severe malaria	add	F	-0.458681	0.391996	0.241954	0.63(0.29-1.36)	EH	2006-12-04	2007-12-12
Kilifi	Kenya	rs915941	153626649	FAM50A	severe malaria	add	F	0.0520176	0.0563625	0.356053	1.05(0.94-1.18)	EH	467/997/458	269/534/279
Kumasi	Ghana	rs915941	153626649	FAM50A	severe malaria	add	F	-0.0809317	0.0738645	0.273219	0.92(0.8-1.07)	EH	243/456/267	183/335/166
Madang	PapuaNewGuinea	rs915941	153626649	FAM50A	severe malaria	add	F	-0.229211	0.275529	0.405468	0.8(0.46-1.36)	E	84/29/0	137/29/3
Moshi	Tanzania	rs915941	153626649	FAM50A	severe malaria	add	F	-0.088732	0.143872	0.537404	0.92(0.69-1.21)	EH	64/121/65	48/105/46
Noguchi	Ghana	rs915941	153626649	FAM50A	severe malaria	add	F	0.0597851	0.18812	0.750635	1.06(0.73-1.53)	EH	12/58/17	60/138/85
Ougadougou	BurkinaFaso	rs915941	153626649	FAM50A	severe malaria	add	F	0.0311909	0.10703	0.770729	1.03(0.84-1.27)	H	84/178/83	93/170/97
All	All	rs915941	153626649	FAM50A	severe malaria	add	F	-0.0111946	0.0276182	0.685231	0.99(0.94-1.04)	EH	1912/3511/2597	1545/2468/1329
Bamako	Mali	rs915941	153626649	FAM50A	severe malaria	rec	F	-0.00484126	0.254916	0.984848	1(0.6-1.64)	EH	47/70/41	42/101/49
Banjul	Gambia	rs915941	153626649	FAM50A	severe malaria	rec	F	0.0300285	0.107005	0.778997	1.03(0.84-1.27)	EH	550/794/277	452/540/193
Blantyre	Malawi	rs915941	153626649	FAM50A	severe malaria	rec	F	-0.055264	0.110482	0.616928	0.95(0.76-1.18)	H	302/595/327	149/351/172
Buea	Cameroon	rs915941	153626649	FAM50A	severe malaria	rec	F	-0.0341168	0.278469	0.902491	0.97(0.56-1.67)	EH	52/80/27	99/131/45
Ho_Chi_Minh_City	VietNam	rs915941	153626649	FAM50A	severe malaria	rec	F	-0.022992	0.241451	0.924137	0.98(0.61-1.57)	E	3/121/1029	1/22/187
Ibadan	Nigeria	rs915941	153626649	FAM50A	severe malaria	rec	F	-0.231757	0.663849	0.727005	0.79(0.22-2.91)	EH	2006-12-04	2007-12-12
Kilifi	Kenya	rs915941	153626649	FAM50A	severe malaria	rec	F	0.146161	0.0912595	0.109244	1.16(0.97-1.38)	EH	467/997/458	269/534/279
Kumasi	Ghana	rs915941	153626649	FAM50A	severe malaria	rec	F	-0.131788	0.121969	0.279917	0.88(0.69-1.11)	EH	243/456/267	183/335/166
Madang	PapuaNewGuinea	rs915941	153626649	FAM50A	severe malaria	rec	F	15.2619	840.274	0.985509	4247566.86(0-Inf)	E	84/29/0	137/29/3
Moshi	Tanzania	rs915941	153626649	FAM50A	severe malaria	rec	F	-0.193124	0.23373	0.408651	0.82(0.52-1.3)	EH	64/121/65	48/105/46
Noguchi	Ghana	rs915941	153626649	FAM50A	severe malaria	rec	F	0.527103	0.306787	0.0857708	1.69(0.93-3.09)	EH	12/58/17	60/138/85
Ougadougou	BurkinaFaso	rs915941	153626649	FAM50A	severe malaria	rec	F	0.160535	0.175148	0.35937	1.17(0.83-1.66)	H	84/178/83	93/170/97
All	All	rs915941	153626649	FAM50A	severe malaria	rec	F	0.0266031	0.0461415	0.56424	1.03(0.94-1.12)	EH	1912/3511/2597	1545/2468/1329
Bamako	Mali	rs915941	153626649	FAM50A	severe malaria	dom	F	0.355508	0.257857	0.167986	1.43(0.86-2.37)	EH	47/70/41	42/101/49
Banjul	Gambia	rs915941	153626649	FAM50A	severe malaria	dom	F	-0.132177	0.0824386	0.108859	0.88(0.75-1.03)	EH	550/794/277	452/540/193
Blantyre	Malawi	rs915941	153626649	FAM50A	severe malaria	dom	F	0.152772	0.114962	0.183885	1.17(0.93-1.46)	H	302/595/327	149/351/172
Buea	Cameroon	rs915941	153626649	FAM50A	severe malaria	dom	F	-0.168508	0.220006	0.443722	0.84(0.55-1.3)	EH	52/80/27	99/131/45
Ho_Chi_Minh_City	VietNam	rs915941	153626649	FAM50A	severe malaria	dom	F	-0.572957	1.1626	0.622138	0.56(0.06-5.51)	E	3/121/1029	1/22/187
Ibadan	Nigeria	rs915941	153626649	FAM50A	severe malaria	dom	F	-1.05468	0.678367	0.120011	0.35(0.09-1.32)	EH	2006-12-04	2007-12-12
Kilifi	Kenya	rs915941	153626649	FAM50A	severe malaria	dom	F	-0.00877102	0.091374	0.923528	0.99(0.83-1.19)	EH	467/997/458	269/534/279
Kumasi	Ghana	rs915941	153626649	FAM50A	severe malaria	dom	F	-0.0878784	0.121576	0.469785	0.92(0.72-1.16)	EH	243/456/267	183/335/166
Madang	PapuaNewGuinea	rs915941	153626649	FAM50A	severe malaria	dom	F	-0.378271	0.296998	0.202788	0.69(0.38-1.23)	E	84/29/0	137/29/3
Moshi	Tanzania	rs915941	153626649	FAM50A	severe malaria	dom	F	-0.0405828	0.234053	0.862343	0.96(0.61-1.52)	EH	64/121/65	48/105/46
Noguchi	Ghana	rs915941	153626649	FAM50A	severe malaria	dom	F	-0.500275	0.354777	0.158507	0.61(0.3-1.22)	EH	12/58/17	60/138/85
Ougadougou	BurkinaFaso	rs915941	153626649	FAM50A	severe malaria	dom	F	-0.0779337	0.175733	0.65742	0.93(0.66-1.31)	H	84/178/83	93/170/97
All	All	rs915941	153626649	FAM50A	severe malaria	dom	F	-0.0518936	0.0436759	0.234774	0.95(0.87-1.03)	EH	1912/3511/2597	1545/2468/1329
Bamako	Mali	rs915941	153626649	FAM50A	severe malaria	het	F	0.271074	0.224165	0.226562	1.31(0.85-2.03)	EH	47/70/41	42/101/49
Banjul	Gambia	rs915941	153626649	FAM50A	severe malaria	het	F	-0.137884	0.0791428	0.08147	0.87(0.75-1.02)	EH	550/794/277	452/540/193
Blantyre	Malawi	rs915941	153626649	FAM50A	severe malaria	het	F	0.152639	0.0969714	0.115473	1.16(0.96-1.41)	H	302/595/327	149/351/172
Buea	Cameroon	rs915941	153626649	FAM50A	severe malaria	het	F	-0.133796	0.208775	0.521613	0.87(0.58-1.32)	EH	52/80/27	99/131/45
Ho_Chi_Minh_City	VietNam	rs915941	153626649	FAM50A	severe malaria	het	F	0.00172319	0.245728	0.994405	1(0.62-1.62)	E	3/121/1029	1/22/187
Ibadan	Nigeria	rs915941	153626649	FAM50A	severe malaria	het	F	-0.717439	0.600837	0.232453	0.49(0.15-1.58)	EH	2006-12-04	2007-12-12
Kilifi	Kenya	rs915941	153626649	FAM50A	severe malaria	het	F	-0.114814	0.0788348	0.145286	0.89(0.76-1.04)	EH	467/997/458	269/534/279
Kumasi	Ghana	rs915941	153626649	FAM50A	severe malaria	het	F	0.0344486	0.107141	0.747811	1.04(0.84-1.28)	EH	243/456/267	183/335/166
Madang	PapuaNewGuinea	rs915941	153626649	FAM50A	severe malaria	het	F	-0.50721	0.302505	0.0936014	0.6(0.33-1.09)	E	84/29/0	137/29/3
Moshi	Tanzania	rs915941	153626649	FAM50A	severe malaria	het	F	0.112622	0.200185	0.573714	1.12(0.76-1.66)	EH	64/121/65	48/105/46
Noguchi	Ghana	rs915941	153626649	FAM50A	severe malaria	het	F	-0.690272	0.262855	0.00863809	0.5(0.3-0.84)	EH	12/58/17	60/138/85
Ougadougou	BurkinaFaso	rs915941	153626649	FAM50A	severe malaria	het	F	-0.180484	0.152459	0.236485	0.83(0.62-1.13)	H	84/178/83	93/170/97
All	All	rs915941	153626649	FAM50A	severe malaria	het	F	-0.0589774	0.0385777	0.126315	0.94(0.87-1.02)	EH	1912/3511/2597	1545/2468/1329
Bamako	Mali	rs915941	153626649	FAM50A	severe malaria	dom	M	0.316228	0.207723	0.127921	1.37(0.91-2.06)	EH	89/0/78	113/0/130
Banjul	Gambia	rs915941	153626649	FAM50A	severe malaria	dom	M	-0.151372	0.0789726	0.0552678	0.86(0.74-1)	EH	898/0/720	780/0/509
Blantyre	Malawi	rs915941	153626649	FAM50A	severe malaria	dom	M	0.0665856	0.0942646	0.479959	1.07(0.89-1.29)	H	649/0/685	330/0/370
Buea	Cameroon	rs915941	153626649	FAM50A	severe malaria	dom	M	0.0758344	0.156101	0.627107	1.08(0.79-1.46)	EH	239/0/165	182/0/137
Ho_Chi_Minh_City	VietNam	rs915941	153626649	FAM50A	severe malaria	dom	M	0.0367152	0.203693	0.856958	1.04(0.7-1.55)	E	88/0/1245	37/0/545
Ibadan	Nigeria	rs915941	153626649	FAM50A	severe malaria	dom	M	-1.0282	0.60526	0.089361	0.36(0.11-1.17)	EH	7/0/11	30/0/16
Kilifi	Kenya	rs915941	153626649	FAM50A	severe malaria	dom	M	-0.0737598	0.077545	0.34151	0.93(0.8-1.08)	EH	907/0/986	568/0/574
Kumasi	Ghana	rs915941	153626649	FAM50A	severe malaria	dom	M	-0.103213	0.103282	0.317633	0.9(0.74-1.1)	EH	423/0/493	374/0/414
Madang	PapuaNewGuinea	rs915941	153626649	FAM50A	severe malaria	dom	M	-0.432009	0.399765	0.279849	0.65(0.3-1.42)	E	115/0/14	195/0/16
Moshi	Tanzania	rs915941	153626649	FAM50A	severe malaria	dom	M	0.0919811	0.203876	0.651873	1.1(0.74-1.63)	EH	102/0/103	106/0/120
Noguchi	Ghana	rs915941	153626649	FAM50A	severe malaria	dom	M	0.0659964	0.22756	0.771803	1.07(0.68-1.67)	EH	48/0/56	170/0/201
Ougadougou	BurkinaFaso	rs915941	153626649	FAM50A	severe malaria	dom	M	0.159235	0.140876	0.258343	1.17(0.89-1.55)	H	182/0/189	217/0/260
All	All	rs915941	153626649	FAM50A	severe malaria	dom	M	-0.0282804	0.0371006	0.445903	0.97(0.9-1.05)	EH	3747/0/4745	3102/0/3292
Bamako	Mali	rs915941	153626649	FAM50A	cerebral malaria	add	All	0.0495146	0.144272	0.731445	1.05(0.79-1.39)	SEH	136/70/119	33/17/28
Banjul	Gambia	rs915941	153626649	FAM50A	cerebral malaria	add	All	-0.049387	0.0475505	0.298981	0.95(0.87-1.04)	SEH	1448/794/997	397/184/229
Blantyre	Malawi	rs915941	153626649	FAM50A	cerebral malaria	add	All	-0.0257749	0.045292	0.5693	0.97(0.89-1.07)	SH	951/595/1012	324/219/325
Buea	Cameroon	rs915941	153626649	FAM50A	cerebral malaria	add	All	-0.137034	0.199737	0.492669	0.87(0.59-1.29)	SEH	291/80/192	2009-09-19
Ho_Chi_Minh_City	VietNam	rs915941	153626649	FAM50A	cerebral malaria	add	All	0.258624	0.193256	0.180818	1.3(0.89-1.89)	SE	91/121/2274	7/3/199
Ibadan	Nigeria	rs915941	153626649	FAM50A	cerebral malaria	add	All	0.114287	0.58908	0.846169	1.12(0.35-3.56)	SEH	2017-12-11	2/0/4
Kilifi	Kenya	rs915941	153626649	FAM50A	cerebral malaria	add	All	-0.0305935	0.0445796	0.492544	0.97(0.89-1.06)	SEH	1374/997/1444	344/213/337
Kumasi	Ghana	rs915941	153626649	FAM50A	cerebral malaria	add	All	-0.118834	0.0853067	0.163614	0.89(0.75-1.05)	SEH	666/456/760	90/57/79
Madang	PapuaNewGuinea	rs915941	153626649	FAM50A	cerebral malaria	add	All	-0.47201	0.500232	0.345383	0.62(0.23-1.66)	SE	199/29/14	41/1/2
Moshi	Tanzania	rs915941	153626649	FAM50A	cerebral malaria	add	All	0.0649612	0.212119	0.759416	1.07(0.7-1.62)	SEH	166/121/168	2013-10-11
Noguchi	Ghana	rs915941	153626649	FAM50A	cerebral malaria	add	All	-0.022421	0.319125	0.943989	0.98(0.52-1.83)	SEH	60/58/73	2010-01-09
Ougadougou	BurkinaFaso	rs915941	153626649	FAM50A	cerebral malaria	add	All	-0.0504222	0.118205	0.669696	0.95(0.75-1.2)	SH	266/178/272	42/27/38
All	All	rs915941	153626649	FAM50A	cerebral malaria	add	All	-0.0365184	0.0233999	0.118612	0.96(0.92-1.01)	SEH	5659/3511/7342	1319/741/1273
Bamako	Mali	rs915941	153626649	FAM50A	cerebral malaria	rec	All	0.0216187	0.281023	0.93868	1.02(0.59-1.77)	SEH	136/70/119	33/17/28
Banjul	Gambia	rs915941	153626649	FAM50A	cerebral malaria	rec	All	-0.0608578	0.0933005	0.514222	0.94(0.78-1.13)	SEH	1448/794/997	397/184/229
Blantyre	Malawi	rs915941	153626649	FAM50A	cerebral malaria	rec	All	-0.0669787	0.0840406	0.425462	0.94(0.79-1.1)	SH	951/595/1012	324/219/325
Buea	Cameroon	rs915941	153626649	FAM50A	cerebral malaria	rec	All	-0.289104	0.411437	0.482262	0.75(0.33-1.68)	SEH	291/80/192	2009-09-19
Ho_Chi_Minh_City	VietNam	rs915941	153626649	FAM50A	cerebral malaria	rec	All	0.47386	0.331938	0.153421	1.61(0.84-3.08)	SE	91/121/2274	7/3/199
Ibadan	Nigeria	rs915941	153626649	FAM50A	cerebral malaria	rec	All	0.645631	1.04392	0.536269	1.91(0.25-14.76)	SEH	2017-12-11	2/0/4
Kilifi	Kenya	rs915941	153626649	FAM50A	cerebral malaria	rec	All	-0.0030539	0.0831885	0.970716	1(0.85-1.17)	SEH	1374/997/1444	344/213/337
Kumasi	Ghana	rs915941	153626649	FAM50A	cerebral malaria	rec	All	-0.240466	0.159854	0.132507	0.79(0.57-1.08)	SEH	666/456/760	90/57/79
Madang	PapuaNewGuinea	rs915941	153626649	FAM50A	cerebral malaria	rec	All	-0.118087	0.806256	0.883555	0.89(0.18-4.32)	SE	199/29/14	41/1/2
Moshi	Tanzania	rs915941	153626649	FAM50A	cerebral malaria	rec	All	0.0207008	0.377392	0.956256	1.02(0.49-2.14)	SEH	166/121/168	2013-10-11
Noguchi	Ghana	rs915941	153626649	FAM50A	cerebral malaria	rec	All	0.630926	0.517317	0.222612	1.88(0.68-5.18)	SEH	60/58/73	2010-01-09
Ougadougou	BurkinaFaso	rs915941	153626649	FAM50A	cerebral malaria	rec	All	-0.138913	0.228582	0.543374	0.87(0.56-1.36)	SH	266/178/272	42/27/38
All	All	rs915941	153626649	FAM50A	cerebral malaria	rec	All	-0.0617567	0.0439442	0.159919	0.94(0.86-1.02)	SEH	5659/3511/7342	1319/741/1273
Bamako	Mali	rs915941	153626649	FAM50A	cerebral malaria	dom	All	0.154162	0.265093	0.560876	1.17(0.69-1.96)	SEH	136/70/119	33/17/28
Banjul	Gambia	rs915941	153626649	FAM50A	cerebral malaria	dom	All	-0.102688	0.0828389	0.215121	0.9(0.77-1.06)	SEH	1448/794/997	397/184/229
Blantyre	Malawi	rs915941	153626649	FAM50A	cerebral malaria	dom	All	-0.0215606	0.0844001	0.79837	0.98(0.83-1.15)	SH	951/595/1012	324/219/325
Buea	Cameroon	rs915941	153626649	FAM50A	cerebral malaria	dom	All	-0.196253	0.344506	0.568904	0.82(0.42-1.61)	SEH	291/80/192	2009-09-19
Ho_Chi_Minh_City	VietNam	rs915941	153626649	FAM50A	cerebral malaria	dom	All	0.448248	0.396836	0.258664	1.57(0.72-3.41)	SE	91/121/2274	7/3/199
Ibadan	Nigeria	rs915941	153626649	FAM50A	cerebral malaria	dom	All	-0.247123	1.01742	0.80809	0.78(0.11-5.74)	SEH	2017-12-11	2/0/4
Kilifi	Kenya	rs915941	153626649	FAM50A	cerebral malaria	dom	All	-0.101027	0.0806543	0.210354	0.9(0.77-1.06)	SEH	1374/997/1444	344/213/337
Kumasi	Ghana	rs915941	153626649	FAM50A	cerebral malaria	dom	All	-0.173788	0.160351	0.278455	0.84(0.61-1.15)	SEH	666/456/760	90/57/79
Madang	PapuaNewGuinea	rs915941	153626649	FAM50A	cerebral malaria	dom	All	-0.996265	0.684119	0.145316	0.37(0.1-1.41)	SE	199/29/14	41/1/2
Moshi	Tanzania	rs915941	153626649	FAM50A	cerebral malaria	dom	All	0.209458	0.42506	0.622174	1.23(0.54-2.84)	SEH	166/121/168	2013-10-11
Noguchi	Ghana	rs915941	153626649	FAM50A	cerebral malaria	dom	All	-0.76358	0.589928	0.195541	0.47(0.15-1.48)	SEH	60/58/73	2010-01-09
Ougadougou	BurkinaFaso	rs915941	153626649	FAM50A	cerebral malaria	dom	All	-0.0378956	0.21668	0.861165	0.96(0.63-1.47)	SH	266/178/272	42/27/38
All	All	rs915941	153626649	FAM50A	cerebral malaria	dom	All	-0.0635554	0.0428268	0.137806	0.94(0.86-1.02)	SEH	5659/3511/7342	1319/741/1273
Bamako	Mali	rs915941	153626649	FAM50A	cerebral malaria	add	F	0.626268	0.303368	0.0389816	1.87(1.03-3.39)	EH	47/70/41	4/17/11
Banjul	Gambia	rs915941	153626649	FAM50A	cerebral malaria	add	F	-0.0952799	0.0833242	0.252838	0.91(0.77-1.07)	EH	550/794/277	156/184/60
Blantyre	Malawi	rs915941	153626649	FAM50A	cerebral malaria	add	F	-0.0387114	0.0787372	0.622964	0.96(0.82-1.12)	H	302/595/327	108/219/107
Buea	Cameroon	rs915941	153626649	FAM50A	cerebral malaria	add	F	0.0969498	0.381592	0.799444	1.1(0.52-2.33)	EH	52/80/27	2003-09-05
Ho_Chi_Minh_City	VietNam	rs915941	153626649	FAM50A	cerebral malaria	add	F	0.566491	0.596665	0.342403	1.76(0.55-5.67)	E	3/121/1029	0/3/44
Ibadan	Nigeria	rs915941	153626649	FAM50A	cerebral malaria	add	F	-0.101332	1.00646	0.919803	0.9(0.13-6.5)	EH	2006-12-04	1/0/1
Kilifi	Kenya	rs915941	153626649	FAM50A	cerebral malaria	add	F	0.0944846	0.078308	0.227595	1.1(0.94-1.28)	EH	467/997/458	107/213/119
Kumasi	Ghana	rs915941	153626649	FAM50A	cerebral malaria	add	F	-0.249994	0.153671	0.103776	0.78(0.58-1.05)	EH	243/456/267	34/57/20
Madang	PapuaNewGuinea	rs915941	153626649	FAM50A	cerebral malaria	add	F	-1.8032	1.08148	0.0954462	0.16(0.02-1.37)	E	84/29/0	2000-01-18
Moshi	Tanzania	rs915941	153626649	FAM50A	cerebral malaria	add	F	-0.265942	0.363133	0.463952	0.77(0.38-1.56)	EH	64/121/65	2003-10-04
Noguchi	Ghana	rs915941	153626649	FAM50A	cerebral malaria	add	F	-0.443906	0.567815	0.434344	0.64(0.21-1.95)	EH	12/58/17	2004-01-05
Ougadougou	BurkinaFaso	rs915941	153626649	FAM50A	cerebral malaria	add	F	0.144006	0.224492	0.521215	1.15(0.74-1.79)	H	84/178/83	9/27/12
All	All	rs915941	153626649	FAM50A	cerebral malaria	add	F	-0.0149145	0.0418531	0.721576	0.99(0.91-1.07)	EH	1912/3511/2597	451/741/384
Bamako	Mali	rs915941	153626649	FAM50A	cerebral malaria	rec	F	0.59041	0.443801	0.183403	1.8(0.76-4.31)	EH	47/70/41	4/17/11
Banjul	Gambia	rs915941	153626649	FAM50A	cerebral malaria	rec	F	-0.0666303	0.158208	0.673641	0.94(0.69-1.28)	EH	550/794/277	156/184/60
Blantyre	Malawi	rs915941	153626649	FAM50A	cerebral malaria	rec	F	-0.105274	0.129574	0.416524	0.9(0.7-1.16)	H	302/595/327	108/219/107
Buea	Cameroon	rs915941	153626649	FAM50A	cerebral malaria	rec	F	0.118481	0.685081	0.862695	1.13(0.29-4.31)	EH	52/80/27	2003-09-05
Ho_Chi_Minh_City	VietNam	rs915941	153626649	FAM50A	cerebral malaria	rec	F	0.562223	0.604727	0.35252	1.75(0.54-5.74)	E	3/121/1029	0/3/44
Ibadan	Nigeria	rs915941	153626649	FAM50A	cerebral malaria	rec	F	0.955511	1.50895	0.526583	2.6(0.14-50.05)	EH	2006-12-04	1/0/1
Kilifi	Kenya	rs915941	153626649	FAM50A	cerebral malaria	rec	F	0.242413	0.123795	0.0502085	1.27(1-1.62)	EH	467/997/458	107/213/119
Kumasi	Ghana	rs915941	153626649	FAM50A	cerebral malaria	rec	F	-0.45251	0.274669	0.0994611	0.64(0.37-1.09)	EH	243/456/267	34/57/20
Madang	PapuaNewGuinea	rs915941	153626649	FAM50A	cerebral malaria	rec	F	NA	NA	NA	NA(NA-NA)	E	84/29/0	2000-01-18
Moshi	Tanzania	rs915941	153626649	FAM50A	cerebral malaria	rec	F	-0.678876	0.669805	0.310801	0.51(0.14-1.88)	EH	64/121/65	2003-10-04
Noguchi	Ghana	rs915941	153626649	FAM50A	cerebral malaria	rec	F	1.0602	0.71572	0.138525	2.89(0.71-11.74)	EH	12/58/17	2004-01-05
Ougadougou	BurkinaFaso	rs915941	153626649	FAM50A	cerebral malaria	rec	F	0.0561703	0.358673	0.875555	1.06(0.52-2.14)	H	84/178/83	9/27/12
All	All	rs915941	153626649	FAM50A	cerebral malaria	rec	F	0.0282402	0.0699497	0.686417	1.03(0.9-1.18)	EH	1912/3511/2597	451/741/384
Bamako	Mali	rs915941	153626649	FAM50A	cerebral malaria	dom	F	1.21829	0.604489	0.043863	3.38(1.03-11.06)	EH	47/70/41	4/17/11
Banjul	Gambia	rs915941	153626649	FAM50A	cerebral malaria	dom	F	-0.155876	0.117816	0.185821	0.86(0.68-1.08)	EH	550/794/277	156/184/60
Blantyre	Malawi	rs915941	153626649	FAM50A	cerebral malaria	dom	F	0.00175491	0.130051	0.989234	1(0.78-1.29)	H	302/595/327	108/219/107
Buea	Cameroon	rs915941	153626649	FAM50A	cerebral malaria	dom	F	0.131921	0.567238	0.816098	1.14(0.38-3.47)	EH	52/80/27	2003-09-05
Ho_Chi_Minh_City	VietNam	rs915941	153626649	FAM50A	cerebral malaria	dom	F	14.2724	2277.71	0.995	1579130.42(0-Inf)	E	3/121/1029	0/3/44
Ibadan	Nigeria	rs915941	153626649	FAM50A	cerebral malaria	dom	F	-1.25276	1.52362	0.410948	0.29(0.01-5.66)	EH	2006-12-04	1/0/1
Kilifi	Kenya	rs915941	153626649	FAM50A	cerebral malaria	dom	F	0.00118664	0.126378	0.992508	1(0.78-1.28)	EH	467/997/458	107/213/119
Kumasi	Ghana	rs915941	153626649	FAM50A	cerebral malaria	dom	F	-0.247905	0.243275	0.308189	0.78(0.48-1.26)	EH	243/456/267	34/57/20
Madang	PapuaNewGuinea	rs915941	153626649	FAM50A	cerebral malaria	dom	F	-1.8032	1.08148	0.0954462	0.16(0.02-1.37)	E	84/29/0	2000-01-18
Moshi	Tanzania	rs915941	153626649	FAM50A	cerebral malaria	dom	F	-0.0863814	0.600732	0.885663	0.92(0.28-2.98)	EH	64/121/65	2003-10-04
Noguchi	Ghana	rs915941	153626649	FAM50A	cerebral malaria	dom	F	-2.09129	0.75767	0.0057774	0.12(0.03-0.55)	EH	12/58/17	2004-01-05
Ougadougou	BurkinaFaso	rs915941	153626649	FAM50A	cerebral malaria	dom	F	0.346311	0.392398	0.37748	1.41(0.66-3.05)	H	84/178/83	9/27/12
All	All	rs915941	153626649	FAM50A	cerebral malaria	dom	F	-0.061655	0.065511	0.346633	0.94(0.83-1.07)	EH	1912/3511/2597	451/741/384
Bamako	Mali	rs915941	153626649	FAM50A	cerebral malaria	het	F	0.259041	0.405823	0.523271	1.3(0.58-2.87)	EH	47/70/41	4/17/11
Banjul	Gambia	rs915941	153626649	FAM50A	cerebral malaria	het	F	-0.109174	0.113992	0.338198	0.9(0.72-1.12)	EH	550/794/277	156/184/60
Blantyre	Malawi	rs915941	153626649	FAM50A	cerebral malaria	het	F	0.0816287	0.112478	0.468005	1.09(0.87-1.35)	H	302/595/327	108/219/107
Buea	Cameroon	rs915941	153626649	FAM50A	cerebral malaria	het	F	0.0471301	0.522512	0.928129	1.05(0.38-2.92)	EH	52/80/27	2003-09-05
Ho_Chi_Minh_City	VietNam	rs915941	153626649	FAM50A	cerebral malaria	het	F	-0.536818	0.604761	0.374727	0.58(0.18-1.91)	E	3/121/1029	0/3/44
Ibadan	Nigeria	rs915941	153626649	FAM50A	cerebral malaria	het	F	-19.062	5910.12	0.997427	0(0-Inf)	EH	2006-12-04	1/0/1
Kilifi	Kenya	rs915941	153626649	FAM50A	cerebral malaria	het	F	-0.180948	0.108885	0.096546	0.83(0.67-1.03)	EH	467/997/458	107/213/119
Kumasi	Ghana	rs915941	153626649	FAM50A	cerebral malaria	het	F	0.129941	0.221375	0.557225	1.14(0.74-1.76)	EH	243/456/267	34/57/20
Madang	PapuaNewGuinea	rs915941	153626649	FAM50A	cerebral malaria	het	F	-1.8032	1.08148	0.0954462	0.16(0.02-1.37)	E	84/29/0	2000-01-18
Moshi	Tanzania	rs915941	153626649	FAM50A	cerebral malaria	het	F	0.41402	0.522262	0.427927	1.51(0.54-4.21)	EH	64/121/65	2003-10-04
Noguchi	Ghana	rs915941	153626649	FAM50A	cerebral malaria	het	F	-3.02353	1.08906	0.00549882	0.05(0.01-0.41)	EH	12/58/17	2004-01-05
Ougadougou	BurkinaFaso	rs915941	153626649	FAM50A	cerebral malaria	het	F	0.193791	0.312164	0.534733	1.21(0.66-2.24)	H	84/178/83	9/27/12
All	All	rs915941	153626649	FAM50A	cerebral malaria	het	F	-0.0681392	0.0583753	0.243105	0.93(0.83-1.05)	EH	1912/3511/2597	451/741/384
Bamako	Mali	rs915941	153626649	FAM50A	cerebral malaria	dom	M	-0.290179	0.357689	0.417217	0.75(0.37-1.51)	EH	89/0/78	29/0/17
Banjul	Gambia	rs915941	153626649	FAM50A	cerebral malaria	dom	M	-0.0553409	0.115742	0.632549	0.95(0.75-1.19)	EH	898/0/720	241/0/169
Blantyre	Malawi	rs915941	153626649	FAM50A	cerebral malaria	dom	M	-0.0386483	0.111195	0.728162	0.96(0.77-1.2)	H	649/0/685	216/0/218
Buea	Cameroon	rs915941	153626649	FAM50A	cerebral malaria	dom	M	-0.453694	0.500136	0.364332	0.64(0.24-1.69)	EH	239/0/165	14/0/6
Ho_Chi_Minh_City	VietNam	rs915941	153626649	FAM50A	cerebral malaria	dom	M	0.452665	0.403419	0.261832	1.57(0.71-3.47)	E	88/0/1245	7/0/155
Ibadan	Nigeria	rs915941	153626649	FAM50A	cerebral malaria	dom	M	0.405465	1.30703	0.756395	1.5(0.12-19.44)	H	7/0/11	1/0/3
Kilifi	Kenya	rs915941	153626649	FAM50A	cerebral malaria	dom	M	-0.17298	0.106427	0.10409	0.84(0.68-1.04)	EH	907/0/986	237/0/218
Kumasi	Ghana	rs915941	153626649	FAM50A	cerebral malaria	dom	M	-0.118159	0.209987	0.57364	0.89(0.59-1.34)	EH	423/0/493	56/0/59
Madang	PapuaNewGuinea	rs915941	153626649	FAM50A	cerebral malaria	dom	M	-0.159065	0.808487	0.844028	0.85(0.17-4.16)	E	115/0/14	23/0/2
Moshi	Tanzania	rs915941	153626649	FAM50A	cerebral malaria	dom	M	0.446114	0.530483	0.400372	1.56(0.55-4.42)	EH	102/0/103	7/0/10
Noguchi	Ghana	rs915941	153626649	FAM50A	cerebral malaria	dom	M	0.304002	0.685034	0.657204	1.36(0.35-5.19)	EH	48/0/56	4/0/6
Ougadougou	BurkinaFaso	rs915941	153626649	FAM50A	cerebral malaria	dom	M	-0.256538	0.284342	0.366941	0.77(0.44-1.35)	H	182/0/189	33/0/26
All	All	rs915941	153626649	FAM50A	cerebral malaria	dom	M	-0.0886428	0.056914	0.119355	0.92(0.82-1.02)	EH	3747/0/4745	868/0/889
Bamako	Mali	rs915941	153626649	FAM50A	severe malarial anaemia	add	All	0.214961	0.107649	0.0458392	1.24(1-1.53)	SEH	136/70/119	60/41/80
Banjul	Gambia	rs915941	153626649	FAM50A	severe malarial anaemia	add	All	-0.0462134	0.0594217	0.436735	0.95(0.85-1.07)	SEH	1448/794/997	224/101/138
Blantyre	Malawi	rs915941	153626649	FAM50A	severe malarial anaemia	add	All	0.278206	0.103885	0.00740621	1.32(1.08-1.62)	SH	951/595/1012	31/37/60
Buea	Cameroon	rs915941	153626649	FAM50A	severe malarial anaemia	add	All	0.249724	0.146821	0.0889666	1.28(0.96-1.71)	SEH	291/80/192	29/17/30
Ho_Chi_Minh_City	VietNam	rs915941	153626649	FAM50A	severe malarial anaemia	add	All	0.185743	0.391716	0.635373	1.2(0.56-2.59)	SE	91/121/2274	0/3/27
Ibadan	Nigeria	rs915941	153626649	FAM50A	severe malarial anaemia	add	All	-0.12296	0.51175	0.810119	0.88(0.32-2.41)	SEH	2017-12-11	2002-03-02
Kilifi	Kenya	rs915941	153626649	FAM50A	severe malarial anaemia	add	All	-0.0247725	0.0953076	0.794924	0.98(0.81-1.18)	SEH	1374/997/1444	61/34/61
Kumasi	Ghana	rs915941	153626649	FAM50A	severe malarial anaemia	add	All	0.0125984	0.0609928	0.836357	1.01(0.9-1.14)	SEH	666/456/760	183/133/227
Madang	PapuaNewGuinea	rs915941	153626649	FAM50A	severe malarial anaemia	add	All	-0.36373	0.250119	0.145883	0.7(0.43-1.13)	SE	199/29/14	101/9/5
Moshi	Tanzania	rs915941	153626649	FAM50A	severe malarial anaemia	add	All	0.0391434	0.105681	0.711091	1.04(0.85-1.28)	SEH	166/121/168	65/39/73
Noguchi	Ghana	rs915941	153626649	FAM50A	severe malarial anaemia	add	All	0.0423493	0.114182	0.710718	1.04(0.83-1.3)	SEH	60/58/73	93/34/114
Ougadougou	BurkinaFaso	rs915941	153626649	FAM50A	severe malarial anaemia	add	All	0.253552	0.20989	0.227039	1.29(0.85-1.94)	SH	266/178/272	2019-07-12
All	All	rs915941	153626649	FAM50A	severe malarial anaemia	add	All	0.044972	0.0296444	0.129255	1.05(0.99-1.11)	SEH	5659/3511/7342	861/458/836
Bamako	Mali	rs915941	153626649	FAM50A	severe malarial anaemia	rec	All	0.303931	0.1972	0.12326	1.36(0.92-1.99)	SEH	136/70/119	60/41/80
Banjul	Gambia	rs915941	153626649	FAM50A	severe malarial anaemia	rec	All	-0.0488316	0.116399	0.674836	0.95(0.76-1.2)	SEH	1448/794/997	224/101/138
Blantyre	Malawi	rs915941	153626649	FAM50A	severe malarial anaemia	rec	All	0.340077	0.185186	0.0662975	1.41(0.98-2.02)	SH	951/595/1012	31/37/60
Buea	Cameroon	rs915941	153626649	FAM50A	severe malarial anaemia	rec	All	0.507713	0.2716	0.061576	1.66(0.98-2.83)	SEH	291/80/192	29/17/30
Ho_Chi_Minh_City	VietNam	rs915941	153626649	FAM50A	severe malarial anaemia	rec	All	-0.0668765	0.598704	0.91106	0.94(0.29-3.02)	SE	91/121/2274	0/3/27
Ibadan	Nigeria	rs915941	153626649	FAM50A	severe malarial anaemia	rec	All	-0.349427	1.0496	0.739199	0.71(0.09-5.52)	SEH	2017-12-11	2002-03-02
Kilifi	Kenya	rs915941	153626649	FAM50A	severe malarial anaemia	rec	All	-0.00445069	0.174057	0.9796	1(0.71-1.4)	SEH	1374/997/1444	61/34/61
Kumasi	Ghana	rs915941	153626649	FAM50A	severe malarial anaemia	rec	All	-0.00686233	0.113215	0.951667	0.99(0.8-1.24)	SEH	666/456/760	183/133/227
Madang	PapuaNewGuinea	rs915941	153626649	FAM50A	severe malarial anaemia	rec	All	-0.313712	0.529906	0.55384	0.73(0.26-2.06)	SE	199/29/14	101/9/5
Moshi	Tanzania	rs915941	153626649	FAM50A	severe malarial anaemia	rec	All	0.00965346	0.196134	0.960745	1.01(0.69-1.48)	SEH	166/121/168	65/39/73
Noguchi	Ghana	rs915941	153626649	FAM50A	severe malarial anaemia	rec	All	0.315667	0.210126	0.133027	1.37(0.91-2.07)	SEH	60/58/73	93/34/114
Ougadougou	BurkinaFaso	rs915941	153626649	FAM50A	severe malarial anaemia	rec	All	0.598611	0.355783	0.0924681	1.82(0.91-3.65)	SH	266/178/272	2019-07-12
All	All	rs915941	153626649	FAM50A	severe malarial anaemia	rec	All	0.0982415	0.0555484	0.0769652	1.1(0.99-1.23)	SEH	5659/3511/7342	861/458/836
Bamako	Mali	rs915941	153626649	FAM50A	severe malarial anaemia	dom	All	0.450182	0.207778	0.0302618	1.57(1.04-2.36)	SEH	136/70/119	60/41/80
Banjul	Gambia	rs915941	153626649	FAM50A	severe malarial anaemia	dom	All	-0.104129	0.103843	0.315976	0.9(0.74-1.1)	SEH	1448/794/997	224/101/138
Blantyre	Malawi	rs915941	153626649	FAM50A	severe malarial anaemia	dom	All	0.647347	0.21178	0.00223792	1.91(1.26-2.89)	SH	951/595/1012	31/37/60
Buea	Cameroon	rs915941	153626649	FAM50A	severe malarial anaemia	dom	All	0.362961	0.271834	0.181801	1.44(0.84-2.45)	SEH	291/80/192	29/17/30
Ho_Chi_Minh_City	VietNam	rs915941	153626649	FAM50A	severe malarial anaemia	dom	All	14.1514	0.283461	0	1399248.24(802808.66-2438807.32)	SE	91/121/2274	0/3/27
Ibadan	Nigeria	rs915941	153626649	FAM50A	severe malarial anaemia	dom	All	-0.06787	0.86972	0.937799	0.93(0.17-5.14)	SEH	2017-12-11	2002-03-02
Kilifi	Kenya	rs915941	153626649	FAM50A	severe malarial anaemia	dom	All	-0.0805532	0.17879	0.652317	0.92(0.65-1.31)	SEH	1374/997/1444	61/34/61
Kumasi	Ghana	rs915941	153626649	FAM50A	severe malarial anaemia	dom	All	0.0514413	0.114714	0.653841	1.05(0.84-1.32)	SEH	666/456/760	183/133/227
Madang	PapuaNewGuinea	rs915941	153626649	FAM50A	severe malarial anaemia	dom	All	-0.620187	0.351668	0.0778062	0.54(0.27-1.07)	SE	199/29/14	101/9/5
Moshi	Tanzania	rs915941	153626649	FAM50A	severe malarial anaemia	dom	All	0.128143	0.201494	0.5248	1.14(0.77-1.69)	SEH	166/121/168	65/39/73
Noguchi	Ghana	rs915941	153626649	FAM50A	severe malarial anaemia	dom	All	-0.189436	0.220102	0.389416	0.83(0.54-1.27)	SEH	60/58/73	93/34/114
Ougadougou	BurkinaFaso	rs915941	153626649	FAM50A	severe malarial anaemia	dom	All	0.231141	0.37811	0.540996	1.26(0.6-2.64)	SH	266/178/272	2019-07-12
All	All	rs915941	153626649	FAM50A	severe malarial anaemia	dom	All	0.0577534	0.0546357	0.290483	1.06(0.95-1.18)	SEH	5659/3511/7342	861/458/836
Bamako	Mali	rs915941	153626649	FAM50A	severe malarial anaemia	add	F	0.18557	0.196372	0.344663	1.2(0.82-1.77)	EH	47/70/41	16/41/22
Banjul	Gambia	rs915941	153626649	FAM50A	severe malarial anaemia	add	F	-0.00949105	0.105743	0.928481	0.99(0.81-1.22)	EH	550/794/277	80/101/40
Blantyre	Malawi	rs915941	153626649	FAM50A	severe malarial anaemia	add	F	0.346056	0.18466	0.0609274	1.41(0.98-2.03)	H	302/595/327	7/37/19
Buea	Cameroon	rs915941	153626649	FAM50A	severe malarial anaemia	add	F	0.249645	0.273431	0.361237	1.28(0.75-2.19)	EH	52/80/27	11/17/10
Ho_Chi_Minh_City	VietNam	rs915941	153626649	FAM50A	severe malarial anaemia	add	F	-0.494942	0.620847	0.425333	0.61(0.18-2.06)	E	3/121/1029	0/3/13
Ibadan	Nigeria	rs915941	153626649	FAM50A	severe malarial anaemia	add	F	1.01394	1.23404	0.41128	2.76(0.25-30.96)	EH	2006-12-04	0/3/1
Kilifi	Kenya	rs915941	153626649	FAM50A	severe malarial anaemia	add	F	-0.222413	0.177032	0.208992	0.8(0.57-1.13)	EH	467/997/458	23/34/15
Kumasi	Ghana	rs915941	153626649	FAM50A	severe malarial anaemia	add	F	0.0466691	0.10816	0.666118	1.05(0.85-1.3)	EH	243/456/267	58/133/67
Madang	PapuaNewGuinea	rs915941	153626649	FAM50A	severe malarial anaemia	add	F	-0.440692	0.405506	0.277138	0.64(0.29-1.42)	E	84/29/0	51/9/1
Moshi	Tanzania	rs915941	153626649	FAM50A	severe malarial anaemia	add	F	-0.233519	0.203166	0.250391	0.79(0.53-1.18)	EH	64/121/65	18/39/14
Noguchi	Ghana	rs915941	153626649	FAM50A	severe malarial anaemia	add	F	0.0819982	0.232685	0.724538	1.09(0.69-1.71)	EH	12/58/17	23/34/33
Ougadougou	BurkinaFaso	rs915941	153626649	FAM50A	severe malarial anaemia	add	F	0.318356	0.331842	0.337378	1.37(0.72-2.63)	H	84/178/83	2008-07-05
All	All	rs915941	153626649	FAM50A	severe malarial anaemia	add	F	0.029064	0.0540374	0.590681	1.03(0.93-1.14)	EH	1912/3511/2597	292/458/243
Bamako	Mali	rs915941	153626649	FAM50A	severe malarial anaemia	rec	F	0.086706	0.318517	0.785455	1.09(0.58-2.04)	EH	47/70/41	16/41/22
Banjul	Gambia	rs915941	153626649	FAM50A	severe malarial anaemia	rec	F	0.101773	0.191704	0.595499	1.11(0.76-1.61)	EH	550/794/277	80/101/40
Blantyre	Malawi	rs915941	153626649	FAM50A	severe malarial anaemia	rec	F	0.17332	0.282436	0.539439	1.19(0.68-2.07)	H	302/595/327	7/37/19
Buea	Cameroon	rs915941	153626649	FAM50A	severe malarial anaemia	rec	F	0.568879	0.463165	0.219355	1.77(0.71-4.38)	EH	52/80/27	11/17/10
Ho_Chi_Minh_City	VietNam	rs915941	153626649	FAM50A	severe malarial anaemia	rec	F	-0.587738	0.655818	0.370151	0.56(0.15-2.01)	E	3/121/1029	0/3/13
Ibadan	Nigeria	rs915941	153626649	FAM50A	severe malarial anaemia	rec	F	0.955511	1.50895	0.526583	2.6(0.14-50.05)	EH	2006-12-04	0/3/1
Kilifi	Kenya	rs915941	153626649	FAM50A	severe malarial anaemia	rec	F	-0.214366	0.304747	0.481792	0.81(0.44-1.47)	EH	467/997/458	23/34/15
Kumasi	Ghana	rs915941	153626649	FAM50A	severe malarial anaemia	rec	F	-0.00633472	0.175277	0.97117	0.99(0.7-1.4)	EH	243/456/267	58/133/67
Madang	PapuaNewGuinea	rs915941	153626649	FAM50A	severe malarial anaemia	rec	F	18.2592	3956.18	0.996317	85089624.68(0-Inf)	E	84/29/0	51/9/1
Moshi	Tanzania	rs915941	153626649	FAM50A	severe malarial anaemia	rec	F	-0.476103	0.346274	0.169152	0.62(0.32-1.22)	EH	64/121/65	18/39/14
Noguchi	Ghana	rs915941	153626649	FAM50A	severe malarial anaemia	rec	F	0.803126	0.364033	0.0273708	2.23(1.09-4.56)	EH	12/58/17	23/34/33
Ougadougou	BurkinaFaso	rs915941	153626649	FAM50A	severe malarial anaemia	rec	F	0.749317	0.475256	0.114874	2.12(0.83-5.37)	H	84/178/83	2008-07-05
All	All	rs915941	153626649	FAM50A	severe malarial anaemia	rec	F	0.0805542	0.0900344	0.370945	1.08(0.91-1.29)	EH	1912/3511/2597	292/458/243
Bamako	Mali	rs915941	153626649	FAM50A	severe malarial anaemia	dom	F	0.435924	0.338137	0.197331	1.55(0.8-3)	EH	47/70/41	16/41/22
Banjul	Gambia	rs915941	153626649	FAM50A	severe malarial anaemia	dom	F	-0.0831981	0.152354	0.585008	0.92(0.68-1.24)	EH	550/794/277	80/101/40
Blantyre	Malawi	rs915941	153626649	FAM50A	severe malarial anaemia	dom	F	0.980829	0.406586	0.0158498	2.67(1.2-5.92)	H	302/595/327	7/37/19
Buea	Cameroon	rs915941	153626649	FAM50A	severe malarial anaemia	dom	F	0.142497	0.410206	0.728307	1.15(0.52-2.58)	EH	52/80/27	11/17/10
Ho_Chi_Minh_City	VietNam	rs915941	153626649	FAM50A	severe malarial anaemia	dom	F	12.8203	1335.77	0.992342	369655.73(0-Inf)	E	3/121/1029	0/3/13
Ibadan	Nigeria	rs915941	153626649	FAM50A	severe malarial anaemia	dom	F	16.6202	3261.32	0.995934	16521256.06(0-Inf)	EH	2006-12-04	0/3/1
Kilifi	Kenya	rs915941	153626649	FAM50A	severe malarial anaemia	dom	F	-0.34992	0.263728	0.184568	0.7(0.42-1.18)	EH	467/997/458	23/34/15
Kumasi	Ghana	rs915941	153626649	FAM50A	severe malarial anaemia	dom	F	0.139665	0.184469	0.44898	1.15(0.8-1.65)	EH	243/456/267	58/133/67
Madang	PapuaNewGuinea	rs915941	153626649	FAM50A	severe malarial anaemia	dom	F	-0.596779	0.4276	0.162821	0.55(0.24-1.27)	E	84/29/0	51/9/1
Moshi	Tanzania	rs915941	153626649	FAM50A	severe malarial anaemia	dom	F	-0.154833	0.326038	0.634863	0.86(0.45-1.62)	EH	64/121/65	18/39/14
Noguchi	Ghana	rs915941	153626649	FAM50A	severe malarial anaemia	dom	F	-0.801433	0.421038	0.0569792	0.45(0.2-1.02)	EH	12/58/17	23/34/33
Ougadougou	BurkinaFaso	rs915941	153626649	FAM50A	severe malarial anaemia	dom	F	-0.0214141	0.532814	0.967941	0.98(0.34-2.78)	H	84/178/83	2008-07-05
All	All	rs915941	153626649	FAM50A	severe malarial anaemia	dom	F	0.000950665	0.0849941	0.991076	1(0.85-1.18)	EH	1912/3511/2597	292/458/243
Bamako	Mali	rs915941	153626649	FAM50A	severe malarial anaemia	het	F	0.254482	0.284809	0.37158	1.29(0.74-2.25)	EH	47/70/41	16/41/22
Banjul	Gambia	rs915941	153626649	FAM50A	severe malarial anaemia	het	F	-0.133243	0.146126	0.361854	0.88(0.66-1.17)	EH	550/794/277	80/101/40
Blantyre	Malawi	rs915941	153626649	FAM50A	severe malarial anaemia	het	F	0.418362	0.262565	0.111079	1.52(0.91-2.54)	H	302/595/327	7/37/19
Buea	Cameroon	rs915941	153626649	FAM50A	severe malarial anaemia	het	F	-0.23593	0.381337	0.53612	0.79(0.37-1.67)	EH	52/80/27	11/17/10
Ho_Chi_Minh_City	VietNam	rs915941	153626649	FAM50A	severe malarial anaemia	het	F	0.631408	0.654489	0.334678	1.88(0.52-6.78)	E	3/121/1029	0/3/13
Ibadan	Nigeria	rs915941	153626649	FAM50A	severe malarial anaemia	het	F	5.82814e-16	1.49071	1	1(0.05-18.57)	EH	2006-12-04	0/3/1
Kilifi	Kenya	rs915941	153626649	FAM50A	severe malarial anaemia	het	F	-0.135281	0.244375	0.579865	0.87(0.54-1.41)	EH	467/997/458	23/34/15
Kumasi	Ghana	rs915941	153626649	FAM50A	severe malarial anaemia	het	F	0.107246	0.155979	0.491723	1.11(0.82-1.51)	EH	243/456/267	58/133/67
Madang	PapuaNewGuinea	rs915941	153626649	FAM50A	severe malarial anaemia	het	F	-0.737298	0.442031	0.0953198	0.48(0.2-1.14)	E	84/29/0	51/9/1
Moshi	Tanzania	rs915941	153626649	FAM50A	severe malarial anaemia	het	F	0.223244	0.281374	0.42754	1.25(0.72-2.17)	EH	64/121/65	18/39/14
Noguchi	Ghana	rs915941	153626649	FAM50A	severe malarial anaemia	het	F	-1.1452	0.329012	0.000500044	0.32(0.17-0.61)	EH	12/58/17	23/34/33
Ougadougou	BurkinaFaso	rs915941	153626649	FAM50A	severe malarial anaemia	het	F	-0.676563	0.482255	0.160642	0.51(0.2-1.31)	H	84/178/83	2008-07-05
All	All	rs915941	153626649	FAM50A	severe malarial anaemia	het	F	-0.0552459	0.0755507	0.464631	0.95(0.82-1.1)	EH	1912/3511/2597	292/458/243
Bamako	Mali	rs915941	153626649	FAM50A	severe malarial anaemia	dom	M	0.446822	0.26326	0.0896468	1.56(0.93-2.62)	EH	89/0/78	44/0/58
Banjul	Gambia	rs915941	153626649	FAM50A	severe malarial anaemia	dom	M	-0.133553	0.142428	0.348405	0.87(0.66-1.16)	EH	898/0/720	144/0/98
Blantyre	Malawi	rs915941	153626649	FAM50A	severe malarial anaemia	dom	M	0.486497	0.263099	0.0644428	1.63(0.97-2.72)	H	649/0/685	24/0/41
Buea	Cameroon	rs915941	153626649	FAM50A	severe malarial anaemia	dom	M	0.532391	0.351052	0.129378	1.7(0.86-3.39)	EH	239/0/165	18/0/20
Ho_Chi_Minh_City	VietNam	rs915941	153626649	FAM50A	severe malarial anaemia	dom	M	15.0744	1128.89	0.989346	3521621.12(0-Inf)	E	88/0/1245	0/0/14
Ibadan	Nigeria	rs915941	153626649	FAM50A	severe malarial anaemia	dom	M	-1.19539	1.3455	0.374309	0.3(0.02-4.23)	H	7/0/11	2/0/1
Kilifi	Kenya	rs915941	153626649	FAM50A	severe malarial anaemia	dom	M	0.101913	0.225721	0.651628	1.11(0.71-1.72)	EH	907/0/986	38/0/46
Kumasi	Ghana	rs915941	153626649	FAM50A	severe malarial anaemia	dom	M	-0.00646529	0.149334	0.965467	0.99(0.74-1.33)	EH	423/0/493	125/0/160
Madang	PapuaNewGuinea	rs915941	153626649	FAM50A	severe malarial anaemia	dom	M	-0.679076	0.653796	0.29896	0.51(0.14-1.83)	E	115/0/14	50/0/4
Moshi	Tanzania	rs915941	153626649	FAM50A	severe malarial anaemia	dom	M	0.281575	0.259809	0.278464	1.33(0.8-2.21)	EH	102/0/103	47/0/59
Noguchi	Ghana	rs915941	153626649	FAM50A	severe malarial anaemia	dom	M	0.0528359	0.264824	0.841861	1.05(0.63-1.77)	EH	48/0/56	70/0/81
Ougadougou	BurkinaFaso	rs915941	153626649	FAM50A	severe malarial anaemia	dom	M	0.433858	0.495834	0.381571	1.54(0.58-4.08)	H	182/0/189	7/0/11
All	All	rs915941	153626649	FAM50A	severe malarial anaemia	dom	M	0.0923635	0.072499	0.202665	1.1(0.95-1.26)	EH	3659/0/3500	569/0/579
Bamako	Mali	rs915941	153626649	FAM50A	cerebral malaria and severe malaria1 anaemia	add	All	0.293935	0.161956	0.0695386	1.34(0.98-1.84)	SEH	136/70/119	19/22/28
Banjul	Gambia	rs915941	153626649	FAM50A	cerebral malaria and severe malaria1 anaemia	add	All	-0.00637061	0.100386	0.949399	0.99(0.82-1.21)	SEH	1448/794/997	64/35/38
Blantyre	Malawi	rs915941	153626649	FAM50A	cerebral malaria and severe malaria1 anaemia	add	All	0.0873702	0.0923378	0.344046	1.09(0.91-1.31)	SH	951/595/1012	53/37/67
Buea	Cameroon	rs915941	153626649	FAM50A	cerebral malaria and severe malaria1 anaemia	add	All	-0.686772	0.673484	0.307857	0.5(0.13-1.88)	SEH	291/80/192	2001-01-05
Ho_Chi_Minh_City	VietNam	rs915941	153626649	FAM50A	cerebral malaria and severe malaria1 anaemia	add	All	15.3277	0.402952	0	4536650.17(2059404.68-9993759.36)	SE	91/121/2274	0/0/8
Ibadan	Nigeria	rs915941	153626649	FAM50A	cerebral malaria and severe malaria1 anaemia	add	All	-9.23502e-16	0.197135	1	1(0.68-1.47)	SEH	2017-12-11	0/0/0
Kilifi	Kenya	rs915941	153626649	FAM50A	cerebral malaria and severe malaria1 anaemia	add	All	0.0455391	0.0837105	0.586437	1.05(0.89-1.23)	SEH	1374/997/1444	72/55/84
Kumasi	Ghana	rs915941	153626649	FAM50A	cerebral malaria and severe malaria1 anaemia	add	All	0.0697585	0.132439	0.598386	1.07(0.83-1.39)	SEH	666/456/760	25/15/36
Madang	PapuaNewGuinea	rs915941	153626649	FAM50A	cerebral malaria and severe malaria1 anaemia	add	All	1.09785	0.541189	0.0425002	3(1.04-8.66)	SE	199/29/14	2002-01-06
Moshi	Tanzania	rs915941	153626649	FAM50A	cerebral malaria and severe malaria1 anaemia	add	All	0.0565477	0.250325	0.821281	1.06(0.65-1.73)	SEH	166/121/168	2012-06-10
Noguchi	Ghana	rs915941	153626649	FAM50A	cerebral malaria and severe malaria1 anaemia	add	All	0.0460619	0.368979	0.900654	1.05(0.51-2.16)	SEH	60/58/73	2006-02-05
Ougadougou	BurkinaFaso	rs915941	153626649	FAM50A	cerebral malaria and severe malaria1 anaemia	add	All	-0.0719377	0.273548	0.792566	0.93(0.54-1.59)	SH	266/178/272	2007-04-08
All	All	rs915941	153626649	FAM50A	cerebral malaria and severe malaria1 anaemia	add	All	0.063776	0.0448078	0.154643	1.07(0.98-1.16)	SEH	5568/3390/5068	267/178/281
Bamako	Mali	rs915941	153626649	FAM50A	cerebral malaria and severe malaria1 anaemia	rec	All	0.293261	0.286251	0.305604	1.34(0.77-2.35)	SEH	136/70/119	19/22/28
Banjul	Gambia	rs915941	153626649	FAM50A	cerebral malaria and severe malaria1 anaemia	rec	All	-0.0904907	0.199949	0.650859	0.91(0.62-1.35)	SEH	1448/794/997	64/35/38
Blantyre	Malawi	rs915941	153626649	FAM50A	cerebral malaria and severe malaria1 anaemia	rec	All	0.105666	0.169001	0.531812	1.11(0.8-1.55)	SH	951/595/1012	53/37/67
Buea	Cameroon	rs915941	153626649	FAM50A	cerebral malaria and severe malaria1 anaemia	rec	All	-0.866752	1.04168	0.40537	0.42(0.05-3.24)	SEH	291/80/192	2001-01-05
Ho_Chi_Minh_City	VietNam	rs915941	153626649	FAM50A	cerebral malaria and severe malaria1 anaemia	rec	All	15.9919	0.35852	0	8814766.56(4365536.81-17798523.5)	SE	91/121/2274	0/0/8
Ibadan	Nigeria	rs915941	153626649	FAM50A	cerebral malaria and severe malaria1 anaemia	rec	All	5.75639e-16	0.358124	1	1(0.5-2.02)	SEH	2017-12-11	0/0/0
Kilifi	Kenya	rs915941	153626649	FAM50A	cerebral malaria and severe malaria1 anaemia	rec	All	0.0750892	0.155418	0.628995	1.08(0.79-1.46)	SEH	1374/997/1444	72/55/84
Kumasi	Ghana	rs915941	153626649	FAM50A	cerebral malaria and severe malaria1 anaemia	rec	All	-0.00635023	0.251712	0.979873	0.99(0.61-1.63)	SEH	666/456/760	25/15/36
Madang	PapuaNewGuinea	rs915941	153626649	FAM50A	cerebral malaria and severe malaria1 anaemia	rec	All	2.77307	1.1474	0.015656	16.01(1.69-151.7)	SE	199/29/14	2002-01-06
Moshi	Tanzania	rs915941	153626649	FAM50A	cerebral malaria and severe malaria1 anaemia	rec	All	0.251927	0.44345	0.569962	1.29(0.54-3.07)	SEH	166/121/168	2012-06-10
Noguchi	Ghana	rs915941	153626649	FAM50A	cerebral malaria and severe malaria1 anaemia	rec	All	0.433556	0.639568	0.497843	1.54(0.44-5.4)	SEH	60/58/73	2006-02-05
Ougadougou	BurkinaFaso	rs915941	153626649	FAM50A	cerebral malaria and severe malaria1 anaemia	rec	All	-0.0490527	0.498955	0.921685	0.95(0.36-2.53)	SH	266/178/272	2007-04-08
All	All	rs915941	153626649	FAM50A	cerebral malaria and severe malaria1 anaemia	rec	All	0.0751458	0.0832239	0.36656	1.08(0.92-1.27)	SEH	5568/3390/5068	267/178/281
Bamako	Mali	rs915941	153626649	FAM50A	cerebral malaria and severe malaria1 anaemia	dom	All	0.728326	0.330611	0.0275968	2.07(1.08-3.96)	SEH	136/70/119	19/22/28
Banjul	Gambia	rs915941	153626649	FAM50A	cerebral malaria and severe malaria1 anaemia	dom	All	0.0522763	0.180543	0.772161	1.05(0.74-1.5)	SEH	1448/794/997	64/35/38
Blantyre	Malawi	rs915941	153626649	FAM50A	cerebral malaria and severe malaria1 anaemia	dom	All	0.2032	0.180046	0.259067	1.23(0.86-1.74)	SH	951/595/1012	53/37/67
Buea	Cameroon	rs915941	153626649	FAM50A	cerebral malaria and severe malaria1 anaemia	dom	All	-1.19735	0.939446	0.202477	0.3(0.05-1.9)	SEH	291/80/192	2001-01-05
Ho_Chi_Minh_City	VietNam	rs915941	153626649	FAM50A	cerebral malaria and severe malaria1 anaemia	dom	All	14.4864	0.843518	4.17569e-66	1955920.23(374409.62-10217750.01)	SE	91/121/2274	0/0/8
Ibadan	Nigeria	rs915941	153626649	FAM50A	cerebral malaria and severe malaria1 anaemia	dom	All	5.98213e-15	0.364796	1	1(0.49-2.04)	SEH	2017-12-11	0/0/0
Kilifi	Kenya	rs915941	153626649	FAM50A	cerebral malaria and severe malaria1 anaemia	dom	All	0.0805368	0.154081	0.60119	1.08(0.8-1.47)	SEH	1374/997/1444	72/55/84
Kumasi	Ghana	rs915941	153626649	FAM50A	cerebral malaria and severe malaria1 anaemia	dom	All	0.270049	0.266483	0.310878	1.31(0.78-2.21)	SEH	666/456/760	25/15/36
Madang	PapuaNewGuinea	rs915941	153626649	FAM50A	cerebral malaria and severe malaria1 anaemia	dom	All	1.18652	0.914033	0.194246	3.28(0.55-19.65)	SE	199/29/14	2002-01-06
Moshi	Tanzania	rs915941	153626649	FAM50A	cerebral malaria and severe malaria1 anaemia	dom	All	-0.0713857	0.43629	0.870031	0.93(0.4-2.19)	SEH	166/121/168	2012-06-10
Noguchi	Ghana	rs915941	153626649	FAM50A	cerebral malaria and severe malaria1 anaemia	dom	All	-0.30686	0.675303	0.649538	0.74(0.2-2.76)	SEH	60/58/73	2006-02-05
Ougadougou	BurkinaFaso	rs915941	153626649	FAM50A	cerebral malaria and severe malaria1 anaemia	dom	All	-0.195672	0.500542	0.695857	0.82(0.31-2.19)	SH	266/178/272	2007-04-08
All	All	rs915941	153626649	FAM50A	cerebral malaria and severe malaria1 anaemia	dom	All	0.145064	0.0844869	0.0859798	1.16(0.98-1.36)	SEH	5568/3390/5068	267/178/281
Bamako	Mali	rs915941	153626649	FAM50A	cerebral malaria and severe malaria1 anaemia	add	F	0.155907	0.283368	0.582187	1.17(0.67-2.04)	EH	47/70/41	7/22/7
Banjul	Gambia	rs915941	153626649	FAM50A	cerebral malaria and severe malaria1 anaemia	add	F	0.00555234	0.188459	0.976496	1.01(0.7-1.45)	EH	550/794/277	21/35/8
Blantyre	Malawi	rs915941	153626649	FAM50A	cerebral malaria and severe malaria1 anaemia	add	F	-0.00407654	0.171739	0.981062	1(0.71-1.39)	H	302/595/327	16/37/17
Buea	Cameroon	rs915941	153626649	FAM50A	cerebral malaria and severe malaria1 anaemia	add	F	-1.64315	1.08339	0.129349	0.19(0.02-1.62)	EH	52/80/27	2000-01-03
Ho_Chi_Minh_City	VietNam	rs915941	153626649	FAM50A	cerebral malaria and severe malaria1 anaemia	add	F	15.4671	1541.52	0.991994	5215390.12(0-Inf)	E	3/121/1029	0/0/7
Ibadan	Nigeria	rs915941	153626649	FAM50A	cerebral malaria and severe malaria1 anaemia	add	F	-3.32781e-16	72223.3	1	1(0-Inf)	EH	2006-12-04	0/0/0
Kilifi	Kenya	rs915941	153626649	FAM50A	cerebral malaria and severe malaria1 anaemia	add	F	0.114899	0.14694	0.434247	1.12(0.84-1.5)	EH	467/997/458	23/55/27
Kumasi	Ghana	rs915941	153626649	FAM50A	cerebral malaria and severe malaria1 anaemia	add	F	0.023482	0.305368	0.938705	1.02(0.56-1.86)	EH	243/456/267	4/15/7
Madang	PapuaNewGuinea	rs915941	153626649	FAM50A	cerebral malaria and severe malaria1 anaemia	add	F	-0.174444	1.25185	0.889174	0.84(0.07-9.77)	E	84/29/0	2000-01-04
Moshi	Tanzania	rs915941	153626649	FAM50A	cerebral malaria and severe malaria1 anaemia	add	F	0.128101	0.393568	0.744814	1.14(0.53-2.46)	EH	64/121/65	2005-06-04
Noguchi	Ghana	rs915941	153626649	FAM50A	cerebral malaria and severe malaria1 anaemia	add	F	-0.0753393	0.694583	0.913625	0.93(0.24-3.62)	EH	12/58/17	2002-02-02
Ougadougou	BurkinaFaso	rs915941	153626649	FAM50A	cerebral malaria and severe malaria1 anaemia	add	F	-0.215787	0.487296	0.657891	0.81(0.31-2.09)	H	84/178/83	2002-04-03
All	All	rs915941	153626649	FAM50A	cerebral malaria and severe malaria1 anaemia	add	F	0.033617	0.0823828	0.683231	1.03(0.88-1.22)	EH	1909/3390/1568	87/178/75
Bamako	Mali	rs915941	153626649	FAM50A	cerebral malaria and severe malaria1 anaemia	rec	F	-0.250986	0.485348	0.605069	0.78(0.3-2.01)	EH	47/70/41	7/22/7
Banjul	Gambia	rs915941	153626649	FAM50A	cerebral malaria and severe malaria1 anaemia	rec	F	-0.249894	0.387202	0.518678	0.78(0.36-1.66)	EH	550/794/277	21/35/8
Blantyre	Malawi	rs915941	153626649	FAM50A	cerebral malaria and severe malaria1 anaemia	rec	F	-0.124008	0.286536	0.665173	0.88(0.5-1.55)	H	302/595/327	16/37/17
Buea	Cameroon	rs915941	153626649	FAM50A	cerebral malaria and severe malaria1 anaemia	rec	F	-17.0779	3287.31	0.995855	0(0-Inf)	EH	52/80/27	2000-01-03
Ho_Chi_Minh_City	VietNam	rs915941	153626649	FAM50A	cerebral malaria and severe malaria1 anaemia	rec	F	15.5237	1571.76	0.99212	5518852.03(0-Inf)	E	3/121/1029	0/0/7
Ibadan	Nigeria	rs915941	153626649	FAM50A	cerebral malaria and severe malaria1 anaemia	rec	F	1.18533e-15	113667	1	1(0-Inf)	EH	2006-12-04	0/0/0
Kilifi	Kenya	rs915941	153626649	FAM50A	cerebral malaria and severe malaria1 anaemia	rec	F	0.137952	0.233335	0.554375	1.15(0.73-1.81)	EH	467/997/458	23/55/27
Kumasi	Ghana	rs915941	153626649	FAM50A	cerebral malaria and severe malaria1 anaemia	rec	F	-0.523308	0.562588	0.352278	0.59(0.2-1.78)	EH	243/456/267	4/15/7
Madang	PapuaNewGuinea	rs915941	153626649	FAM50A	cerebral malaria and severe malaria1 anaemia	rec	F	NA	NA	NA	NA(NA-NA)	E	84/29/0	2000-01-04
Moshi	Tanzania	rs915941	153626649	FAM50A	cerebral malaria and severe malaria1 anaemia	rec	F	0.487279	0.590207	0.409027	1.63(0.51-5.18)	EH	64/121/65	2005-06-04
Noguchi	Ghana	rs915941	153626649	FAM50A	cerebral malaria and severe malaria1 anaemia	rec	F	0.729877	0.928741	0.431939	2.07(0.34-12.81)	EH	12/58/17	2002-02-02
Ougadougou	BurkinaFaso	rs915941	153626649	FAM50A	cerebral malaria and severe malaria1 anaemia	rec	F	-0.0979804	0.812645	0.904032	0.91(0.18-4.46)	H	84/178/83	2002-04-03
All	All	rs915941	153626649	FAM50A	cerebral malaria and severe malaria1 anaemia	rec	F	-0.0525452	0.140074	0.707567	0.95(0.72-1.25)	EH	1909/3390/1568	87/178/75
Bamako	Mali	rs915941	153626649	FAM50A	cerebral malaria and severe malaria1 anaemia	dom	F	0.684102	0.502414	0.173314	1.98(0.74-5.31)	EH	47/70/41	7/22/7
Banjul	Gambia	rs915941	153626649	FAM50A	cerebral malaria and severe malaria1 anaemia	dom	F	0.145455	0.27473	0.596495	1.16(0.68-1.98)	EH	550/794/277	21/35/8
Blantyre	Malawi	rs915941	153626649	FAM50A	cerebral malaria and severe malaria1 anaemia	dom	F	0.117783	0.292602	0.68729	1.12(0.63-2)	H	302/595/327	16/37/17
Buea	Cameroon	rs915941	153626649	FAM50A	cerebral malaria and severe malaria1 anaemia	dom	F	-1.80077	1.17159	0.124288	0.17(0.02-1.64)	EH	52/80/27	2000-01-03
Ho_Chi_Minh_City	VietNam	rs915941	153626649	FAM50A	cerebral malaria and severe malaria1 anaemia	dom	F	14.002	5856.08	0.998092	1205060.12(0-Inf)	E	3/121/1029	0/0/7
Ibadan	Nigeria	rs915941	153626649	FAM50A	cerebral malaria and severe malaria1 anaemia	dom	F	-9.59039e-15	122461	1	1(0-Inf)	EH	2006-12-04	0/0/0
Kilifi	Kenya	rs915941	153626649	FAM50A	cerebral malaria and severe malaria1 anaemia	dom	F	0.165689	0.245071	0.498986	1.18(0.73-1.91)	EH	467/997/458	23/55/27
Kumasi	Ghana	rs915941	153626649	FAM50A	cerebral malaria and severe malaria1 anaemia	dom	F	0.683836	0.628826	0.276824	1.98(0.58-6.8)	EH	243/456/267	4/15/7
Madang	PapuaNewGuinea	rs915941	153626649	FAM50A	cerebral malaria and severe malaria1 anaemia	dom	F	-0.174444	1.25185	0.889174	0.84(0.07-9.77)	E	84/29/0	2000-01-04
Moshi	Tanzania	rs915941	153626649	FAM50A	cerebral malaria and severe malaria1 anaemia	dom	F	-0.184967	0.613969	0.763213	0.83(0.25-2.77)	EH	64/121/65	2005-06-04
Noguchi	Ghana	rs915941	153626649	FAM50A	cerebral malaria and severe malaria1 anaemia	dom	F	-0.977223	0.963208	0.31032	0.38(0.06-2.49)	EH	12/58/17	2002-02-02
Ougadougou	BurkinaFaso	rs915941	153626649	FAM50A	cerebral malaria and severe malaria1 anaemia	dom	F	-0.426879	0.719183	0.552806	0.65(0.16-2.67)	H	84/178/83	2002-04-03
All	All	rs915941	153626649	FAM50A	cerebral malaria and severe malaria1 anaemia	dom	F	0.132627	0.13332	0.319833	1.14(0.88-1.48)	EH	1909/3390/1568	87/178/75
Bamako	Mali	rs915941	153626649	FAM50A	cerebral malaria and severe malaria1 anaemia	het	F	0.658194	0.404248	0.103484	1.93(0.87-4.27)	EH	47/70/41	7/22/7
Banjul	Gambia	rs915941	153626649	FAM50A	cerebral malaria and severe malaria1 anaemia	het	F	0.25009	0.258051	0.332471	1.28(0.77-2.13)	EH	550/794/277	21/35/8
Blantyre	Malawi	rs915941	153626649	FAM50A	cerebral malaria and severe malaria1 anaemia	het	F	0.179951	0.24654	0.465448	1.2(0.74-1.94)	H	302/595/327	16/37/17
Buea	Cameroon	rs915941	153626649	FAM50A	cerebral malaria and severe malaria1 anaemia	het	F	-1.05562	1.17178	0.367659	0.35(0.04-3.46)	EH	52/80/27	2000-01-03
Ho_Chi_Minh_City	VietNam	rs915941	153626649	FAM50A	cerebral malaria and severe malaria1 anaemia	het	F	-15.5304	1592.71	0.99222	0(0-Inf)	E	3/121/1029	0/0/7
Ibadan	Nigeria	rs915941	153626649	FAM50A	cerebral malaria and severe malaria1 anaemia	het	F	-6.58515e-16	101823	1	1(0-Inf)	EH	2006-12-04	0/0/0
Kilifi	Kenya	rs915941	153626649	FAM50A	cerebral malaria and severe malaria1 anaemia	het	F	0.0168526	0.2036	0.934032	1.02(0.68-1.52)	EH	467/997/458	23/55/27
Kumasi	Ghana	rs915941	153626649	FAM50A	cerebral malaria and severe malaria1 anaemia	het	F	0.825581	0.469453	0.0786451	2.28(0.91-5.73)	EH	243/456/267	4/15/7
Madang	PapuaNewGuinea	rs915941	153626649	FAM50A	cerebral malaria and severe malaria1 anaemia	het	F	-0.174444	1.25185	0.889174	0.84(0.07-9.77)	E	84/29/0	2000-01-04
Moshi	Tanzania	rs915941	153626649	FAM50A	cerebral malaria and severe malaria1 anaemia	het	F	-0.539142	0.557715	0.333695	0.58(0.2-1.74)	EH	64/121/65	2005-06-04
Noguchi	Ghana	rs915941	153626649	FAM50A	cerebral malaria and severe malaria1 anaemia	het	F	-1.31362	0.920185	0.153417	0.27(0.04-1.63)	EH	12/58/17	2002-02-02
Ougadougou	BurkinaFaso	rs915941	153626649	FAM50A	cerebral malaria and severe malaria1 anaemia	het	F	-0.280667	0.680287	0.67992	0.76(0.2-2.87)	H	84/178/83	2002-04-03
All	All	rs915941	153626649	FAM50A	cerebral malaria and severe malaria1 anaemia	het	F	0.137224	0.11516	0.233422	1.15(0.92-1.44)	EH	1909/3390/1568	87/178/75
Bamako	Mali	rs915941	153626649	FAM50A	cerebral malaria and severe malaria1 anaemia	dom	M	0.908248	0.425329	0.0327283	2.48(1.08-5.71)	EH	89/0/78	12/0/21
Banjul	Gambia	rs915941	153626649	FAM50A	cerebral malaria and severe malaria1 anaemia	dom	M	-0.0196137	0.248975	0.937209	0.98(0.6-1.6)	EH	898/0/720	43/0/30
Blantyre	Malawi	rs915941	153626649	FAM50A	cerebral malaria and severe malaria1 anaemia	dom	M	0.252083	0.224033	0.260502	1.29(0.83-2)	H	649/0/685	37/0/50
Buea	Cameroon	rs915941	153626649	FAM50A	cerebral malaria and severe malaria1 anaemia	dom	M	-0.242627	1.23178	0.843849	0.78(0.07-8.77)	EH	239/0/165	2/0/1
Ho_Chi_Minh_City	VietNam	rs915941	153626649	FAM50A	cerebral malaria and severe malaria1 anaemia	dom	M	15.377	5063.81	0.997577	4765989.33(0-Inf)	E	88/0/1245	0/0/1
Ibadan	Nigeria	rs915941	153626649	FAM50A	cerebral malaria and severe malaria1 anaemia	dom	M	5.03647e-15	105818	1	1(0-Inf)	H	7/0/11	0/0/0
Kilifi	Kenya	rs915941	153626649	FAM50A	cerebral malaria and severe malaria1 anaemia	dom	M	0.011603	0.204086	0.954662	1.01(0.68-1.51)	EH	907/0/986	49/0/57
Kumasi	Ghana	rs915941	153626649	FAM50A	cerebral malaria and severe malaria1 anaemia	dom	M	0.145434	0.308752	0.637613	1.16(0.63-2.12)	EH	423/0/493	21/0/29
Madang	PapuaNewGuinea	rs915941	153626649	FAM50A	cerebral malaria and severe malaria1 anaemia	dom	M	2.67415	1.26286	0.0342153	14.5(1.22-172.31)	E	115/0/14	2/0/2
Moshi	Tanzania	rs915941	153626649	FAM50A	cerebral malaria and severe malaria1 anaemia	dom	M	0.14895	0.621551	0.810607	1.16(0.34-3.92)	EH	102/0/103	6/0/7
Noguchi	Ghana	rs915941	153626649	FAM50A	cerebral malaria and severe malaria1 anaemia	dom	M	0.209925	0.809714	0.795436	1.23(0.25-6.03)	EH	48/0/56	3/0/4
Ougadougou	BurkinaFaso	rs915941	153626649	FAM50A	cerebral malaria and severe malaria1 anaemia	dom	M	-0.0181274	0.641939	0.977472	0.98(0.28-3.46)	H	182/0/189	5/0/5
All	All	rs915941	153626649	FAM50A	cerebral malaria and severe malaria1 anaemia	dom	M	0.157117	0.108528	0.147698	1.17(0.95-1.45)	EH	3659/0/3500	180/0/206
Bamako	Mali	rs915941	153626649	FAM50A	other severe malaria	add	All	0.0836292	0.127613	0.512254	1.09(0.85-1.4)	SEH	136/70/119	43/21/43
Banjul	Gambia	rs915941	153626649	FAM50A	other severe malaria	add	All	-0.0995335	0.042703	0.0197622	0.91(0.83-0.98)	SEH	1448/794/997	547/220/297
Blantyre	Malawi	rs915941	153626649	FAM50A	other severe malaria	add	All	0.0867691	0.0795595	0.275441	1.09(0.93-1.27)	SH	951/595/1012	71/58/90
Buea	Cameroon	rs915941	153626649	FAM50A	other severe malaria	add	All	-0.0126075	0.0735452	0.86389	0.99(0.85-1.14)	SEH	291/80/192	228/104/142
Ho_Chi_Minh_City	VietNam	rs915941	153626649	FAM50A	other severe malaria	add	All	-0.0809459	0.102213	0.428399	0.92(0.75-1.13)	SE	91/121/2274	31/16/498
Ibadan	Nigeria	rs915941	153626649	FAM50A	other severe malaria	add	All	-0.614233	0.248003	0.0132598	0.54(0.33-0.88)	SEH	2017-12-11	38/9/17
Kilifi	Kenya	rs915941	153626649	FAM50A	other severe malaria	add	All	-0.00487898	0.0427641	0.909166	1(0.92-1.08)	SEH	1374/997/1444	360/232/371
Kumasi	Ghana	rs915941	153626649	FAM50A	other severe malaria	add	All	-0.121977	0.0551412	0.0269606	0.89(0.79-0.99)	SEH	666/456/760	259/130/238
Madang	PapuaNewGuinea	rs915941	153626649	FAM50A	other severe malaria	add	All	-0.215636	0.186893	0.248584	0.81(0.56-1.16)	SE	199/29/14	184/18/10
Moshi	Tanzania	rs915941	153626649	FAM50A	other severe malaria	add	All	-0.019389	0.104876	0.853327	0.98(0.8-1.2)	SEH	166/121/168	68/50/68
Noguchi	Ghana	rs915941	153626649	FAM50A	other severe malaria	add	All	0.0437077	0.106692	0.682053	1.04(0.85-1.29)	SEH	60/58/73	123/101/156
Ougadougou	BurkinaFaso	rs915941	153626649	FAM50A	other severe malaria	add	All	0.0756459	0.0618651	0.221422	1.08(0.96-1.22)	SH	266/178/272	248/132/293
All	All	rs915941	153626649	FAM50A	other severe malaria	add	All	-0.0365652	0.0203246	0.0720083	0.96(0.93-1)	SEH	5659/3511/7342	2200/1091/2223
Bamako	Mali	rs915941	153626649	FAM50A	other severe malaria	rec	All	0.149759	0.236607	0.526772	1.16(0.73-1.85)	SEH	136/70/119	43/21/43
Banjul	Gambia	rs915941	153626649	FAM50A	other severe malaria	rec	All	-0.13082	0.0840048	0.119402	0.88(0.74-1.03)	SEH	1448/794/997	547/220/297
Blantyre	Malawi	rs915941	153626649	FAM50A	other severe malaria	rec	All	0.0737137	0.148044	0.618542	1.08(0.81-1.44)	SH	951/595/1012	71/58/90
Buea	Cameroon	rs915941	153626649	FAM50A	other severe malaria	rec	All	-0.000209303	0.14525	0.99885	1(0.75-1.33)	SEH	291/80/192	228/104/142
Ho_Chi_Minh_City	VietNam	rs915941	153626649	FAM50A	other severe malaria	rec	All	-0.138082	0.173374	0.425778	0.87(0.62-1.22)	SE	91/121/2274	31/16/498
Ibadan	Nigeria	rs915941	153626649	FAM50A	other severe malaria	rec	All	-0.920209	0.460882	0.045866	0.4(0.16-0.98)	SEH	2017-12-11	38/9/17
Kilifi	Kenya	rs915941	153626649	FAM50A	other severe malaria	rec	All	0.0168769	0.079575	0.832038	1.02(0.87-1.19)	SEH	1374/997/1444	360/232/371
Kumasi	Ghana	rs915941	153626649	FAM50A	other severe malaria	rec	All	-0.178154	0.10324	0.0844126	0.84(0.68-1.02)	SEH	666/456/760	259/130/238
Madang	PapuaNewGuinea	rs915941	153626649	FAM50A	other severe malaria	rec	All	-0.362654	0.438032	0.407718	0.7(0.29-1.64)	SE	199/29/14	184/18/10
Moshi	Tanzania	rs915941	153626649	FAM50A	other severe malaria	rec	All	-0.0560527	0.193687	0.772277	0.95(0.65-1.38)	SEH	166/121/168	68/50/68
[truncated: 31,801 more rows]
