# Supplementary material for: Characterisation of the opposing effects of G6PD deficiency on cerebral malaria and severe malarial anaemia
Source: eLife. 2017 Jan 9;6:e15085. doi: 10.7554/eLife.15085 (PMC5222559; doi:10.7554/eLife.15085)
Supplement: Figure 1—source data 2. — DOI: http://dx.doi.org/10.7554/eLife.15085.007 [file elife-15085-fig1-data2.xlsx]

## Sheet: 5_Figure_1-source_data_2-Adjust
Site	Country	SNP	Location (B37)	Gene	Phenotype	Model	Sample	Beta	Standard Error	P	OR (95% CI)	Covariates adjusted for: A=G6PD+202; S=sex; E=ethnicity; H=HbS	Control Counts (AA/AD/DD) A=ancestral; D=derived	Case Counts (AA/AD/DD) where A=ancestral; D=derived
Bamako	Mali	rs763737	153278307	IRAK1	severe malaria	add	All	0.148455	0.0913382	0.104091	1.16(0.97-1.39)	SEHA	114/70/129	122/89/196
Banjul	Gambia	rs763737	153278307	IRAK1	severe malaria	add	All	0.0151181	0.0324849	0.641653	1.02(0.95-1.08)	SEHA	1375/786/979	1108/550/801
Blantyre	Malawi	rs763737	153278307	IRAK1	severe malaria	add	All	-0.0176039	0.0429911	0.682188	0.98(0.9-1.07)	SHA	598/523/1403	307/308/734
Buea	Cameroon	rs763737	153278307	IRAK1	severe malaria	add	All	0.18841	0.0701641	0.00724699	1.21(1.05-1.39)	SEHA	240/68/239	187/126/274
Ho_Chi_Minh_City	VietNam	rs763737	153278307	IRAK1	severe malaria	add	All	0.00772413	0.0551661	0.888647	1.01(0.9-1.12)	SE	1784/356/325	589/66/132
Ibadan	Nigeria	rs763737	153278307	IRAK1	severe malaria	add	All	0.0505789	0.24745	0.838041	1.05(0.65-1.71)	SEHA	7/14/17	24/13/39
Kilifi	Kenya	rs763737	153278307	IRAK1	severe malaria	add	All	-0.0509974	0.0343213	0.13731	0.95(0.89-1.02)	SEHA	920/861/1941	601/423/1153
Kumasi	Ghana	rs763737	153278307	IRAK1	severe malaria	add	All	-0.070569	0.044018	0.108894	0.93(0.85-1.02)	SEHA	537/422/897	445/313/686
Madang	PapuaNewGuinea	rs763737	153278307	IRAK1	severe malaria	add	All	-0.0621513	0.329381	0.850335	0.94(0.49-1.79)	SE	232/8/2	370/9/4
Moshi	Tanzania	rs763737	153278307	IRAK1	severe malaria	add	All	0.0815955	0.0897307	0.363172	1.09(0.91-1.29)	SEHA	99/106/249	92/87/245
Noguchi	Ghana	rs763737	153278307	IRAK1	severe malaria	add	All	-0.0220476	0.1022	0.829197	0.98(0.8-1.2)	SEHA	51/42/89	202/132/315
Ougadougou	BurkinaFaso	rs763737	153278307	IRAK1	severe malaria	add	All	-0.0658368	0.0606022	0.277312	0.94(0.83-1.05)	SHA	211/145/355	264/164/406
All	All	rs763737	153278307	IRAK1	severe malaria	add	All	-0.00666759	0.0158109	0.673237	0.99(0.96-1.02)	SEHA	6168/3401/6625	4311/2280/4985
Bamako	Mali	rs763737	153278307	IRAK1	severe malaria	rec	All	0.202892	0.162603	0.212112	1.22(0.89-1.68)	SEHA	114/70/129	122/89/196
Banjul	Gambia	rs763737	153278307	IRAK1	severe malaria	rec	All	0.0699528	0.0624546	0.262689	1.07(0.95-1.21)	SEHA	1375/786/979	1108/550/801
Blantyre	Malawi	rs763737	153278307	IRAK1	severe malaria	rec	All	-0.0640504	0.0735091	0.383576	0.94(0.81-1.08)	SHA	598/523/1403	307/308/734
Buea	Cameroon	rs763737	153278307	IRAK1	severe malaria	rec	All	0.317673	0.133033	0.0169434	1.37(1.06-1.78)	SEHA	240/68/239	187/126/274
Ho_Chi_Minh_City	VietNam	rs763737	153278307	IRAK1	severe malaria	rec	All	0.00914368	0.115239	0.936758	1.01(0.81-1.26)	SE	1784/356/325	589/66/132
Ibadan	Nigeria	rs763737	153278307	IRAK1	severe malaria	rec	All	0.39696	0.43698	0.363657	1.49(0.63-3.5)	SEHA	7/14/17	24/13/39
Kilifi	Kenya	rs763737	153278307	IRAK1	severe malaria	rec	All	-0.0175806	0.059177	0.766401	0.98(0.87-1.1)	SEHA	920/861/1941	601/423/1153
Kumasi	Ghana	rs763737	153278307	IRAK1	severe malaria	rec	All	-0.142271	0.0781654	0.0687405	0.87(0.74-1.01)	SEHA	537/422/897	445/313/686
Madang	PapuaNewGuinea	rs763737	153278307	IRAK1	severe malaria	rec	All	0.26038	0.877612	0.766702	1.3(0.23-7.25)	SE	232/8/2	370/9/4
Moshi	Tanzania	rs763737	153278307	IRAK1	severe malaria	rec	All	0.101296	0.150796	0.501747	1.11(0.82-1.49)	SEHA	99/106/249	92/87/245
Noguchi	Ghana	rs763737	153278307	IRAK1	severe malaria	rec	All	0.00744324	0.178917	0.966816	1.01(0.71-1.43)	SEHA	51/42/89	202/132/315
Ougadougou	BurkinaFaso	rs763737	153278307	IRAK1	severe malaria	rec	All	-0.142599	0.108	0.186714	0.87(0.7-1.07)	SHA	211/145/355	264/164/406
All	All	rs763737	153278307	IRAK1	severe malaria	rec	All	-0.00677898	0.0286129	0.812719	0.99(0.94-1.05)	SEHA	6168/3401/6625	4311/2280/4985
Bamako	Mali	rs763737	153278307	IRAK1	severe malaria	dom	All	0.315948	0.176847	0.0740092	1.37(0.97-1.94)	SEHA	114/70/129	122/89/196
Banjul	Gambia	rs763737	153278307	IRAK1	severe malaria	dom	All	-0.0118404	0.0581487	0.838649	0.99(0.88-1.11)	SEHA	1375/786/979	1108/550/801
Blantyre	Malawi	rs763737	153278307	IRAK1	severe malaria	dom	All	0.0176991	0.0860463	0.837031	1.02(0.86-1.2)	SHA	598/523/1403	307/308/734
Buea	Cameroon	rs763737	153278307	IRAK1	severe malaria	dom	All	0.36166	0.132999	0.0065427	1.44(1.11-1.86)	SEHA	240/68/239	187/126/274
Ho_Chi_Minh_City	VietNam	rs763737	153278307	IRAK1	severe malaria	dom	All	0.0170738	0.0963929	0.859408	1.02(0.84-1.23)	SE	1784/356/325	589/66/132
Ibadan	Nigeria	rs763737	153278307	IRAK1	severe malaria	dom	All	-0.338354	0.512017	0.508724	0.71(0.26-1.94)	SEHA	7/14/17	24/13/39
Kilifi	Kenya	rs763737	153278307	IRAK1	severe malaria	dom	All	-0.176378	0.0674635	0.0089378	0.84(0.73-0.96)	SEHA	920/861/1941	601/423/1153
Kumasi	Ghana	rs763737	153278307	IRAK1	severe malaria	dom	All	-0.095741	0.085557	0.263127	0.91(0.77-1.07)	SEHA	537/422/897	445/313/686
Madang	PapuaNewGuinea	rs763737	153278307	IRAK1	severe malaria	dom	All	-0.18235	0.452147	0.686729	0.83(0.34-2.02)	SE	232/8/2	370/9/4
Moshi	Tanzania	rs763737	153278307	IRAK1	severe malaria	dom	All	0.187061	0.181776	0.303445	1.21(0.84-1.72)	SEHA	99/106/249	92/87/245
Noguchi	Ghana	rs763737	153278307	IRAK1	severe malaria	dom	All	-0.0959149	0.204269	0.638674	0.91(0.61-1.36)	SEHA	51/42/89	202/132/315
Ougadougou	BurkinaFaso	rs763737	153278307	IRAK1	severe malaria	dom	All	-0.0794002	0.118037	0.501157	0.92(0.73-1.16)	SHA	211/145/355	264/164/406
All	All	rs763737	153278307	IRAK1	severe malaria	dom	All	-0.0164009	0.029779	0.581801	0.98(0.93-1.04)	SEHA	6168/3401/6625	4311/2280/4985
Bamako	Mali	rs763737	153278307	IRAK1	severe malaria	add	F	0.0293026	0.171861	0.864616	1.03(0.74-1.44)	EHA	28/70/53	32/89/62
Banjul	Gambia	rs763737	153278307	IRAK1	severe malaria	add	F	-0.0293855	0.0568759	0.605393	0.97(0.87-1.09)	EHA	498/786/301	407/550/226
Blantyre	Malawi	rs763737	153278307	IRAK1	severe malaria	add	F	-0.0207158	0.0744427	0.780798	0.98(0.85-1.13)	HA	162/523/516	81/308/272
Buea	Cameroon	rs763737	153278307	IRAK1	severe malaria	add	F	0.122963	0.150295	0.413276	1.13(0.84-1.52)	EHA	40/68/42	62/126/82
Ho_Chi_Minh_City	VietNam	rs763737	153278307	IRAK1	severe malaria	add	F	-0.112731	0.139857	0.420214	0.89(0.68-1.18)	E	736/356/44	137/66/4
Ibadan	Nigeria	rs763737	153278307	IRAK1	severe malaria	add	F	0.470592	0.535596	0.379601	1.6(0.56-4.57)	EHA	1/14/5	5/13/12
Kilifi	Kenya	rs763737	153278307	IRAK1	severe malaria	add	F	-0.0183404	0.0584379	0.753639	0.98(0.88-1.1)	EHA	269/861/757	179/423/454
Kumasi	Ghana	rs763737	153278307	IRAK1	severe malaria	add	F	-0.105751	0.0765425	0.167096	0.9(0.77-1.05)	EHA	171/422/351	132/313/233
Madang	PapuaNewGuinea	rs763737	153278307	IRAK1	severe malaria	add	F	-0.102432	0.460944	0.82414	0.9(0.37-2.23)	E	105/8/0	161/9/1
Moshi	Tanzania	rs763737	153278307	IRAK1	severe malaria	add	F	-0.100036	0.157641	0.525702	0.9(0.66-1.23)	EHA	25/106/118	24/87/87
Noguchi	Ghana	rs763737	153278307	IRAK1	severe malaria	add	F	0.107777	0.191178	0.572924	1.11(0.77-1.62)	EHA	12/42/31	43/132/106
Ougadougou	BurkinaFaso	rs763737	153278307	IRAK1	severe malaria	add	F	-0.187105	0.107577	0.0819887	0.83(0.67-1.02)	HA	62/145/139	70/164/128
All	All	rs763737	153278307	IRAK1	severe malaria	add	F	-0.0443123	0.0282522	0.116775	0.96(0.91-1.01)	EHA	2109/3401/2357	1333/2280/1667
Bamako	Mali	rs763737	153278307	IRAK1	severe malaria	rec	F	-0.0538838	0.250288	0.829543	0.95(0.58-1.55)	EHA	28/70/53	32/89/62
Banjul	Gambia	rs763737	153278307	IRAK1	severe malaria	rec	F	0.0603287	0.102207	0.555018	1.06(0.87-1.3)	EHA	498/786/301	407/550/226
Blantyre	Malawi	rs763737	153278307	IRAK1	severe malaria	rec	F	-0.0897777	0.102632	0.381707	0.91(0.75-1.12)	HA	162/523/516	81/308/272
Buea	Cameroon	rs763737	153278307	IRAK1	severe malaria	rec	F	0.0889796	0.238654	0.709268	1.09(0.68-1.74)	EHA	40/68/42	62/126/82
Ho_Chi_Minh_City	VietNam	rs763737	153278307	IRAK1	severe malaria	rec	F	-0.721312	0.529228	0.172898	0.49(0.17-1.37)	E	736/356/44	137/66/4
Ibadan	Nigeria	rs763737	153278307	IRAK1	severe malaria	rec	F	1.17807	0.752158	0.117289	3.25(0.74-14.19)	EHA	1/14/5	5/13/12
Kilifi	Kenya	rs763737	153278307	IRAK1	severe malaria	rec	F	0.100804	0.0828107	0.223498	1.11(0.94-1.3)	EHA	269/861/757	179/423/454
Kumasi	Ghana	rs763737	153278307	IRAK1	severe malaria	rec	F	-0.185498	0.114108	0.104026	0.83(0.66-1.04)	EHA	171/422/351	132/313/233
Madang	PapuaNewGuinea	rs763737	153278307	IRAK1	severe malaria	rec	F	14.2296	882.743	0.987139	1512985.7(0-Inf)	E	105/8/0	161/9/1
Moshi	Tanzania	rs763737	153278307	IRAK1	severe malaria	rec	F	-0.118059	0.211251	0.576261	0.89(0.59-1.34)	EHA	25/106/118	24/87/87
Noguchi	Ghana	rs763737	153278307	IRAK1	severe malaria	rec	F	0.21008	0.273184	0.44189	1.23(0.72-2.11)	EHA	12/42/31	43/132/106
Ougadougou	BurkinaFaso	rs763737	153278307	IRAK1	severe malaria	rec	F	-0.288338	0.159481	0.0706111	0.75(0.55-1.02)	HA	62/145/139	70/164/128
All	All	rs763737	153278307	IRAK1	severe malaria	rec	F	-0.0283942	0.0432532	0.511525	0.97(0.89-1.06)	EHA	2109/3401/2357	1333/2280/1667
Bamako	Mali	rs763737	153278307	IRAK1	severe malaria	dom	F	0.179548	0.310949	0.563655	1.2(0.65-2.2)	EHA	28/70/53	32/89/62
Banjul	Gambia	rs763737	153278307	IRAK1	severe malaria	dom	F	-0.107319	0.0849487	0.206467	0.9(0.76-1.06)	EHA	498/786/301	407/550/226
Blantyre	Malawi	rs763737	153278307	IRAK1	severe malaria	dom	F	0.106755	0.149836	0.47617	1.11(0.83-1.49)	HA	162/523/516	81/308/272
Buea	Cameroon	rs763737	153278307	IRAK1	severe malaria	dom	F	0.247701	0.251097	0.323899	1.28(0.78-2.1)	EHA	40/68/42	62/126/82
Ho_Chi_Minh_City	VietNam	rs763737	153278307	IRAK1	severe malaria	dom	F	-0.063736	0.159977	0.69033	0.94(0.69-1.28)	E	736/356/44	137/66/4
Ibadan	Nigeria	rs763737	153278307	IRAK1	severe malaria	dom	F	-0.869531	1.20895	0.471989	0.42(0.04-4.48)	EHA	1/14/5	5/13/12
Kilifi	Kenya	rs763737	153278307	IRAK1	severe malaria	dom	F	-0.254752	0.112018	0.0229533	0.78(0.62-0.97)	EHA	269/861/757	179/423/454
Kumasi	Ghana	rs763737	153278307	IRAK1	severe malaria	dom	F	-0.0737431	0.140747	0.600319	0.93(0.7-1.22)	EHA	171/422/351	132/313/233
Madang	PapuaNewGuinea	rs763737	153278307	IRAK1	severe malaria	dom	F	-0.223863	0.497569	0.652773	0.8(0.3-2.12)	E	105/8/0	161/9/1
Moshi	Tanzania	rs763737	153278307	IRAK1	severe malaria	dom	F	-0.148654	0.32808	0.650474	0.86(0.45-1.64)	EHA	25/106/118	24/87/87
Noguchi	Ghana	rs763737	153278307	IRAK1	severe malaria	dom	F	0.0106082	0.367527	0.976973	1.01(0.49-2.08)	EHA	12/42/31	43/132/106
Ougadougou	BurkinaFaso	rs763737	153278307	IRAK1	severe malaria	dom	F	-0.194839	0.200014	0.329993	0.82(0.56-1.22)	HA	62/145/139	70/164/128
All	All	rs763737	153278307	IRAK1	severe malaria	dom	F	-0.0948857	0.0484654	0.0502534	0.91(0.83-1)	EHA	2109/3401/2357	1333/2280/1667
Bamako	Mali	rs763737	153278307	IRAK1	severe malaria	het	F	0.146372	0.232565	0.529098	1.16(0.73-1.83)	EHA	28/70/53	32/89/62
Banjul	Gambia	rs763737	153278307	IRAK1	severe malaria	het	F	-0.130648	0.079641	0.10091	0.88(0.75-1.03)	EHA	498/786/301	407/550/226
Blantyre	Malawi	rs763737	153278307	IRAK1	severe malaria	het	F	0.13144	0.0991831	0.185098	1.14(0.94-1.39)	HA	162/523/516	81/308/272
Buea	Cameroon	rs763737	153278307	IRAK1	severe malaria	het	F	0.105161	0.213409	0.622178	1.11(0.73-1.69)	EHA	40/68/42	62/126/82
Ho_Chi_Minh_City	VietNam	rs763737	153278307	IRAK1	severe malaria	het	F	0.0237531	0.162807	0.884003	1.02(0.74-1.41)	E	736/356/44	137/66/4
Ibadan	Nigeria	rs763737	153278307	IRAK1	severe malaria	het	F	-1.22222	0.661485	0.0646467	0.29(0.08-1.08)	EHA	1/14/5	5/13/12
Kilifi	Kenya	rs763737	153278307	IRAK1	severe malaria	het	F	-0.227794	0.081243	0.00504939	0.8(0.68-0.93)	EHA	269/861/757	179/423/454
Kumasi	Ghana	rs763737	153278307	IRAK1	severe malaria	het	F	0.124872	0.108335	0.249059	1.13(0.92-1.4)	EHA	171/422/351	132/313/233
Madang	PapuaNewGuinea	rs763737	153278307	IRAK1	severe malaria	het	F	-0.344885	0.509943	0.498838	0.71(0.26-1.92)	E	105/8/0	161/9/1
Moshi	Tanzania	rs763737	153278307	IRAK1	severe malaria	het	F	0.0544745	0.207784	0.793191	1.06(0.7-1.59)	EHA	25/106/118	24/87/87
Noguchi	Ghana	rs763737	153278307	IRAK1	severe malaria	het	F	-0.182867	0.256425	0.47576	0.83(0.5-1.38)	EHA	12/42/31	43/132/106
Ougadougou	BurkinaFaso	rs763737	153278307	IRAK1	severe malaria	het	F	0.154194	0.154172	0.317242	1.17(0.86-1.58)	HA	62/145/139	70/164/128
All	All	rs763737	153278307	IRAK1	severe malaria	het	F	-0.0377974	0.0387719	0.329626	0.96(0.89-1.04)	EHA	2109/3401/2357	1333/2280/1667
Bamako	Mali	rs763737	153278307	IRAK1	severe malaria	dom	M	0.432904	0.219994	0.0490908	1.54(1-2.37)	EHA	86/0/76	90/0/134
Banjul	Gambia	rs763737	153278307	IRAK1	severe malaria	dom	M	0.0707275	0.0797705	0.375275	1.07(0.92-1.25)	EHA	877/0/678	701/0/575
Blantyre	Malawi	rs763737	153278307	IRAK1	severe malaria	dom	M	-0.0321617	0.105935	0.761434	0.97(0.79-1.19)	HA	436/0/887	226/0/462
Buea	Cameroon	rs763737	153278307	IRAK1	severe malaria	dom	M	0.425378	0.159062	0.00748885	1.53(1.12-2.09)	EHA	200/0/197	125/0/192
Ho_Chi_Minh_City	VietNam	rs763737	153278307	IRAK1	severe malaria	dom	M	0.0680267	0.121044	0.574117	1.07(0.84-1.36)	E	1048/0/281	452/0/128
Ibadan	Nigeria	rs763737	153278307	IRAK1	severe malaria	dom	M	-0.0115697	0.63646	0.985497	0.99(0.28-3.44)	EHA	6/0/12	19/0/27
Kilifi	Kenya	rs763737	153278307	IRAK1	severe malaria	dom	M	-0.130994	0.0836032	0.117148	0.88(0.74-1.03)	EHA	651/0/1184	422/0/699
Kumasi	Ghana	rs763737	153278307	IRAK1	severe malaria	dom	M	-0.109868	0.107798	0.308111	0.9(0.73-1.11)	EHA	366/0/546	313/0/453
Madang	PapuaNewGuinea	rs763737	153278307	IRAK1	severe malaria	dom	M	-0.0502618	0.922051	0.956528	0.95(0.16-5.79)	E	127/0/2	209/0/3
Moshi	Tanzania	rs763737	153278307	IRAK1	severe malaria	dom	M	0.387543	0.222227	0.0811762	1.47(0.95-2.28)	EHA	74/0/131	68/0/158
Noguchi	Ghana	rs763737	153278307	IRAK1	severe malaria	dom	M	-0.143544	0.242552	0.553979	0.87(0.54-1.39)	EHA	39/0/58	159/0/209
Ougadougou	BurkinaFaso	rs763737	153278307	IRAK1	severe malaria	dom	M	-0.0143638	0.147418	0.922381	0.99(0.74-1.32)	HA	149/0/216	194/0/278
All	All	rs763737	153278307	IRAK1	severe malaria	dom	M	0.0220685	0.0379949	0.561356	1.02(0.95-1.1)	EHA	4059/0/4268	2978/0/3318
Bamako	Mali	rs763737	153278307	IRAK1	cerebal malaria	add	All	0.0629197	0.160224	0.694542	1.06(0.78-1.46)	SEHA	114/70/129	27/13/35
Banjul	Gambia	rs763737	153278307	IRAK1	cerebal malaria	add	All	0.0452993	0.0477598	0.342884	1.05(0.95-1.15)	SEHA	1375/786/979	362/177/268
Blantyre	Malawi	rs763737	153278307	IRAK1	cerebal malaria	add	All	-0.0460681	0.0498168	0.355096	0.95(0.87-1.05)	SHA	598/523/1403	207/194/448
Buea	Cameroon	rs763737	153278307	IRAK1	cerebal malaria	add	All	0.135232	0.184426	0.463401	1.14(0.8-1.64)	SEHA	240/68/239	2013-12-10
Ho_Chi_Minh_City	VietNam	rs763737	153278307	IRAK1	cerebal malaria	add	All	-0.0668603	0.0991064	0.49991	0.94(0.77-1.14)	SE	1784/356/325	161/13/32
Ibadan	Nigeria	rs763737	153278307	IRAK1	cerebal malaria	add	All	-0.655027	0.596175	0.271892	0.52(0.16-1.67)	SEHA	7/14/17	2002-01-03
Kilifi	Kenya	rs763737	153278307	IRAK1	cerebal malaria	add	All	-0.0757454	0.0469874	0.106954	0.93(0.85-1.02)	SEHA	920/861/1941	250/186/453
Kumasi	Ghana	rs763737	153278307	IRAK1	cerebal malaria	add	All	-0.196135	0.0874715	0.0249434	0.82(0.69-0.98)	SEHA	537/422/897	79/56/87
Madang	PapuaNewGuinea	rs763737	153278307	IRAK1	cerebal malaria	add	All	0.236367	0.613396	0.699984	1.27(0.38-4.21)	SE	232/8/2	42/1/1
Moshi	Tanzania	rs763737	153278307	IRAK1	cerebal malaria	add	All	0.226958	0.221507	0.305547	1.25(0.81-1.94)	SEHA	99/106/249	2020-09-05
Noguchi	Ghana	rs763737	153278307	IRAK1	cerebal malaria	add	All	-0.403219	0.288816	0.16268	0.67(0.38-1.18)	SEHA	51/42/89	2008-03-10
Ougadougou	BurkinaFaso	rs763737	153278307	IRAK1	cerebal malaria	add	All	-0.082145	0.12648	0.516036	0.92(0.72-1.18)	SHA	211/145/355	35/18/53
All	All	rs763737	153278307	IRAK1	cerebal malaria	add	All	-0.0398714	0.0244139	0.102439	0.96(0.92-1.01)	SEHA	6168/3401/6625	1191/683/1420
Bamako	Mali	rs763737	153278307	IRAK1	cerebal malaria	rec	All	0.151014	0.288363	0.600493	1.16(0.66-2.05)	SEHA	114/70/129	27/13/35
Banjul	Gambia	rs763737	153278307	IRAK1	cerebal malaria	rec	All	0.158109	0.0909751	0.0822222	1.17(0.98-1.4)	SEHA	1375/786/979	362/177/268
Blantyre	Malawi	rs763737	153278307	IRAK1	cerebal malaria	rec	All	-0.0945405	0.0856396	0.269621	0.91(0.77-1.08)	SHA	598/523/1403	207/194/448
Buea	Cameroon	rs763737	153278307	IRAK1	cerebal malaria	rec	All	-0.0612924	0.35179	0.861685	0.94(0.47-1.87)	SEHA	240/68/239	2013-12-10
Ho_Chi_Minh_City	VietNam	rs763737	153278307	IRAK1	cerebal malaria	rec	All	-0.128011	0.203209	0.528727	0.88(0.59-1.31)	SE	1784/356/325	161/13/32
Ibadan	Nigeria	rs763737	153278307	IRAK1	cerebal malaria	rec	All	-0.905424	1.0316	0.380111	0.4(0.05-3.05)	SEHA	7/14/17	2002-01-03
Kilifi	Kenya	rs763737	153278307	IRAK1	cerebal malaria	rec	All	-0.0792235	0.081119	0.328751	0.92(0.79-1.08)	SEHA	920/861/1941	250/186/453
Kumasi	Ghana	rs763737	153278307	IRAK1	cerebal malaria	rec	All	-0.408864	0.161509	0.0113567	0.66(0.48-0.91)	SEHA	537/422/897	79/56/87
Madang	PapuaNewGuinea	rs763737	153278307	IRAK1	cerebal malaria	rec	All	1.02469	1.24993	0.412328	2.79(0.24-32.28)	SE	232/8/2	42/1/1
Moshi	Tanzania	rs763737	153278307	IRAK1	cerebal malaria	rec	All	0.194243	0.374178	0.603678	1.21(0.58-2.53)	SEHA	99/106/249	2020-09-05
Noguchi	Ghana	rs763737	153278307	IRAK1	cerebal malaria	rec	All	-0.328766	0.533892	0.538032	0.72(0.25-2.05)	SEHA	51/42/89	2008-03-10
Ougadougou	BurkinaFaso	rs763737	153278307	IRAK1	cerebal malaria	rec	All	-0.0910068	0.219595	0.678559	0.91(0.59-1.4)	SHA	211/145/355	35/18/53
All	All	rs763737	153278307	IRAK1	cerebal malaria	rec	All	-0.0562587	0.0441409	0.202477	0.95(0.87-1.03)	SEHA	6168/3401/6625	1191/683/1420
Bamako	Mali	rs763737	153278307	IRAK1	cerebal malaria	dom	All	0.0596357	0.307337	0.846145	1.06(0.58-1.94)	SEHA	114/70/129	27/13/35
Banjul	Gambia	rs763737	153278307	IRAK1	cerebal malaria	dom	All	0.00753206	0.0846354	0.929086	1.01(0.85-1.19)	SEHA	1375/786/979	362/177/268
Blantyre	Malawi	rs763737	153278307	IRAK1	cerebal malaria	dom	All	-0.0545266	0.0991543	0.582377	0.95(0.78-1.15)	SHA	598/523/1403	207/194/448
Buea	Cameroon	rs763737	153278307	IRAK1	cerebal malaria	dom	All	0.56502	0.388028	0.145356	1.76(0.82-3.76)	SEHA	240/68/239	2013-12-10
Ho_Chi_Minh_City	VietNam	rs763737	153278307	IRAK1	cerebal malaria	dom	All	-0.119304	0.178549	0.504017	0.89(0.63-1.26)	SE	1784/356/325	161/13/32
Ibadan	Nigeria	rs763737	153278307	IRAK1	cerebal malaria	dom	All	-1.46605	1.12967	0.194369	0.23(0.03-2.11)	SEHA	7/14/17	2002-01-03
Kilifi	Kenya	rs763737	153278307	IRAK1	cerebal malaria	dom	All	-0.19094	0.0914404	0.0367855	0.83(0.69-0.99)	SEHA	920/861/1941	250/186/453
Kumasi	Ghana	rs763737	153278307	IRAK1	cerebal malaria	dom	All	-0.262571	0.168659	0.119513	0.77(0.55-1.07)	SEHA	537/422/897	79/56/87
Madang	PapuaNewGuinea	rs763737	153278307	IRAK1	cerebal malaria	dom	All	0.0979606	0.902039	0.91352	1.1(0.19-6.46)	SE	232/8/2	42/1/1
Moshi	Tanzania	rs763737	153278307	IRAK1	cerebal malaria	dom	All	0.704416	0.495674	0.15528	2.02(0.77-5.34)	SEHA	99/106/249	2020-09-05
Noguchi	Ghana	rs763737	153278307	IRAK1	cerebal malaria	dom	All	-1.05677	0.489194	0.0307546	0.35(0.13-0.91)	SEHA	51/42/89	2008-03-10
Ougadougou	BurkinaFaso	rs763737	153278307	IRAK1	cerebal malaria	dom	All	-0.203974	0.248462	0.411677	0.82(0.5-1.33)	SHA	211/145/355	35/18/53
All	All	rs763737	153278307	IRAK1	cerebal malaria	dom	All	-0.0806702	0.0457837	0.0780716	0.92(0.84-1.01)	SEHA	6168/3401/6625	1191/683/1420
Bamako	Mali	rs763737	153278307	IRAK1	cerebal malaria	add	F	0.114626	0.297042	0.699577	1.12(0.63-2.01)	EHA	28/70/53	6/13/12
Banjul	Gambia	rs763737	153278307	IRAK1	cerebal malaria	add	F	0.0482885	0.081902	0.555467	1.05(0.89-1.23)	EHA	498/786/301	136/177/85
Blantyre	Malawi	rs763737	153278307	IRAK1	cerebal malaria	add	F	-0.0837293	0.0855285	0.327598	0.92(0.78-1.09)	HA	162/523/516	61/194/169
Buea	Cameroon	rs763737	153278307	IRAK1	cerebal malaria	add	F	0.0355265	0.368905	0.92328	1.04(0.5-2.14)	EHA	40/68/42	2002-12-02
Ho_Chi_Minh_City	VietNam	rs763737	153278307	IRAK1	cerebal malaria	add	F	-0.334561	0.305756	0.273863	0.72(0.39-1.3)	E	736/356/44	31/13/0
Ibadan	Nigeria	rs763737	153278307	IRAK1	cerebal malaria	add	F	-21.8677	8153.81	0.99786	0(0-Inf)	EHA	1/14/5	2000-01-01
Kilifi	Kenya	rs763737	153278307	IRAK1	cerebal malaria	add	F	-0.119158	0.0805672	0.139143	0.89(0.76-1.04)	EHA	269/861/757	78/186/174
Kumasi	Ghana	rs763737	153278307	IRAK1	cerebal malaria	add	F	-0.249098	0.154959	0.107944	0.78(0.58-1.06)	EHA	171/422/351	26/56/28
Madang	PapuaNewGuinea	rs763737	153278307	IRAK1	cerebal malaria	add	F	-0.461609	1.14731	0.687434	0.63(0.07-5.97)	E	105/8/0	2000-01-18
Moshi	Tanzania	rs763737	153278307	IRAK1	cerebal malaria	add	F	0.268337	0.422119	0.524979	1.31(0.57-2.99)	EHA	25/106/118	0/9/8
Noguchi	Ghana	rs763737	153278307	IRAK1	cerebal malaria	add	F	0.361971	0.519118	0.485627	1.44(0.52-3.97)	EHA	12/42/31	2006-03-02
Ougadougou	BurkinaFaso	rs763737	153278307	IRAK1	cerebal malaria	add	F	-0.448045	0.221544	0.0431381	0.64(0.41-0.99)	HA	62/145/139	13/18/17
All	All	rs763737	153278307	IRAK1	cerebal malaria	add	F	-0.0773392	0.0428409	0.0710333	0.93(0.85-1.01)	EHA	2109/3401/2357	374/683/501
Bamako	Mali	rs763737	153278307	IRAK1	cerebal malaria	rec	F	0.25386	0.43428	0.558847	1.29(0.55-3.02)	EHA	28/70/53	6/13/12
Banjul	Gambia	rs763737	153278307	IRAK1	cerebal malaria	rec	F	0.261455	0.142473	0.0664874	1.3(0.98-1.72)	EHA	498/786/301	136/177/85
Blantyre	Malawi	rs763737	153278307	IRAK1	cerebal malaria	rec	F	-0.131848	0.120123	0.272375	0.88(0.69-1.11)	HA	162/523/516	61/194/169
Buea	Cameroon	rs763737	153278307	IRAK1	cerebal malaria	rec	F	-0.977137	0.786077	0.213847	0.38(0.08-1.76)	EHA	40/68/42	2002-12-02
Ho_Chi_Minh_City	VietNam	rs763737	153278307	IRAK1	cerebal malaria	rec	F	-15.3276	975.572	0.987465	0(0-Inf)	E	736/356/44	31/13/0
Ibadan	Nigeria	rs763737	153278307	IRAK1	cerebal malaria	rec	F	-17.3692	4612.14	0.996995	0(0-Inf)	EHA	1/14/5	2000-01-01
Kilifi	Kenya	rs763737	153278307	IRAK1	cerebal malaria	rec	F	-0.051114	0.114025	0.653957	0.95(0.76-1.19)	EHA	269/861/757	78/186/174
Kumasi	Ghana	rs763737	153278307	IRAK1	cerebal malaria	rec	F	-0.497764	0.251487	0.0477847	0.61(0.37-1)	EHA	171/422/351	26/56/28
Madang	PapuaNewGuinea	rs763737	153278307	IRAK1	cerebal malaria	rec	F	NA	NA	NA	NA(NA-NA)	E	105/8/0	2000-01-18
Moshi	Tanzania	rs763737	153278307	IRAK1	cerebal malaria	rec	F	-0.0120245	0.527837	0.981825	0.99(0.35-2.78)	EHA	25/106/118	0/9/8
Noguchi	Ghana	rs763737	153278307	IRAK1	cerebal malaria	rec	F	0.855177	0.681226	0.209352	2.35(0.62-8.94)	EHA	12/42/31	2006-03-02
Ougadougou	BurkinaFaso	rs763737	153278307	IRAK1	cerebal malaria	rec	F	-0.397687	0.3325	0.231676	0.67(0.35-1.29)	HA	62/145/139	13/18/17
All	All	rs763737	153278307	IRAK1	cerebal malaria	rec	F	-0.0566106	0.0652157	0.385366	0.94(0.83-1.07)	EHA	2109/3401/2357	374/683/501
Bamako	Mali	rs763737	153278307	IRAK1	cerebal malaria	dom	F	-0.00615453	0.536535	0.990848	0.99(0.35-2.84)	EHA	28/70/53	6/13/12
Banjul	Gambia	rs763737	153278307	IRAK1	cerebal malaria	dom	F	-0.077373	0.121341	0.523701	0.93(0.73-1.17)	EHA	498/786/301	136/177/85
Blantyre	Malawi	rs763737	153278307	IRAK1	cerebal malaria	dom	F	-0.0623625	0.166889	0.708645	0.94(0.68-1.3)	HA	162/523/516	61/194/169
Buea	Cameroon	rs763737	153278307	IRAK1	cerebal malaria	dom	F	1.07619	0.78715	0.171564	2.93(0.63-13.72)	EHA	40/68/42	2002-12-02
Ho_Chi_Minh_City	VietNam	rs763737	153278307	IRAK1	cerebal malaria	dom	F	-0.255893	0.336395	0.446841	0.77(0.4-1.5)	E	736/356/44	31/13/0
Ibadan	Nigeria	rs763737	153278307	IRAK1	cerebal malaria	dom	F	-22.063	7757.93	0.997731	0(0-Inf)	EHA	1/14/5	2000-01-01
Kilifi	Kenya	rs763737	153278307	IRAK1	cerebal malaria	dom	F	-0.336301	0.149458	0.0244405	0.71(0.53-0.96)	EHA	269/861/757	78/186/174
Kumasi	Ghana	rs763737	153278307	IRAK1	cerebal malaria	dom	F	-0.140582	0.277301	0.612179	0.87(0.5-1.5)	EHA	171/422/351	26/56/28
Madang	PapuaNewGuinea	rs763737	153278307	IRAK1	cerebal malaria	dom	F	-0.461609	1.14731	0.687434	0.63(0.07-5.97)	E	105/8/0	2000-01-18
Moshi	Tanzania	rs763737	153278307	IRAK1	cerebal malaria	dom	F	16.9511	1989.16	0.993201	23002333.46(0-Inf)	EHA	25/106/118	0/9/8
Noguchi	Ghana	rs763737	153278307	IRAK1	cerebal malaria	dom	F	-0.382815	0.892951	0.668136	0.68(0.12-3.92)	EHA	12/42/31	2006-03-02
Ougadougou	BurkinaFaso	rs763737	153278307	IRAK1	cerebal malaria	dom	F	-0.875006	0.380149	0.0213494	0.42(0.2-0.88)	HA	62/145/139	13/18/17
All	All	rs763737	153278307	IRAK1	cerebal malaria	dom	F	-0.156679	0.0731849	0.0322853	0.85(0.74-0.99)	EHA	2109/3401/2357	374/683/501
Bamako	Mali	rs763737	153278307	IRAK1	cerebal malaria	het	F	-0.236084	0.420793	0.574766	0.79(0.35-1.8)	EHA	28/70/53	6/13/12
Banjul	Gambia	rs763737	153278307	IRAK1	cerebal malaria	het	F	-0.231548	0.114949	0.0439733	0.79(0.63-0.99)	EHA	498/786/301	136/177/85
Blantyre	Malawi	rs763737	153278307	IRAK1	cerebal malaria	het	F	0.0928753	0.115313	0.420579	1.1(0.88-1.38)	HA	162/523/516	61/194/169
Buea	Cameroon	rs763737	153278307	IRAK1	cerebal malaria	het	F	1.38197	0.610672	0.0236336	3.98(1.2-13.18)	EHA	40/68/42	2002-12-02
Ho_Chi_Minh_City	VietNam	rs763737	153278307	IRAK1	cerebal malaria	het	F	-0.0831847	0.336736	0.804883	0.92(0.48-1.78)	E	736/356/44	31/13/0
Ibadan	Nigeria	rs763737	153278307	IRAK1	cerebal malaria	het	F	-1.21891	1.63128	0.454935	0.3(0.01-7.23)	EHA	1/14/5	2000-01-01
Kilifi	Kenya	rs763737	153278307	IRAK1	cerebal malaria	het	F	-0.12593	0.110361	0.25384	0.88(0.71-1.09)	EHA	269/861/757	78/186/174
Kumasi	Ghana	rs763737	153278307	IRAK1	cerebal malaria	het	F	0.334051	0.2223	0.132916	1.4(0.9-2.16)	EHA	171/422/351	26/56/28
Madang	PapuaNewGuinea	rs763737	153278307	IRAK1	cerebal malaria	het	F	-0.461609	1.14731	0.687434	0.63(0.07-5.97)	E	105/8/0	2000-01-18
Moshi	Tanzania	rs763737	153278307	IRAK1	cerebal malaria	het	F	0.455748	0.524387	0.384788	1.58(0.56-4.41)	EHA	25/106/118	0/9/8
Noguchi	Ghana	rs763737	153278307	IRAK1	cerebal malaria	het	F	-1.03505	0.718792	0.14987	0.36(0.09-1.45)	EHA	12/42/31	2006-03-02
Ougadougou	BurkinaFaso	rs763737	153278307	IRAK1	cerebal malaria	het	F	-0.17198	0.322409	0.593742	0.84(0.45-1.58)	HA	62/145/139	13/18/17
All	All	rs763737	153278307	IRAK1	cerebal malaria	het	F	-0.0529197	0.0587512	0.367726	0.95(0.85-1.06)	EHA	2109/3401/2357	374/683/501
Bamako	Mali	rs763737	153278307	IRAK1	cerebal malaria	dom	M	0.117683	0.377595	0.755295	1.12(0.54-2.36)	EHA	86/0/76	21/0/23
Banjul	Gambia	rs763737	153278307	IRAK1	cerebal malaria	dom	M	0.0868964	0.116527	0.455836	1.09(0.87-1.37)	EHA	877/0/678	226/0/183
Blantyre	Malawi	rs763737	153278307	IRAK1	cerebal malaria	dom	M	-0.0525816	0.123907	0.6713	0.95(0.74-1.21)	HA	436/0/887	146/0/279
Buea	Cameroon	rs763737	153278307	IRAK1	cerebal malaria	dom	M	0.332401	0.484335	0.492522	1.39(0.54-3.6)	EHA	200/0/197	8/0/11
Ho_Chi_Minh_City	VietNam	rs763737	153278307	IRAK1	cerebal malaria	dom	M	-0.0575089	0.209063	0.783255	0.94(0.63-1.42)	E	1048/0/281	130/0/32
Ibadan	Nigeria	rs763737	153278307	IRAK1	cerebal malaria	dom	M	-0.693147	1.22474	0.571426	0.5(0.05-5.51)	HA	6/0/12	2/0/2
Kilifi	Kenya	rs763737	153278307	IRAK1	cerebal malaria	dom	M	-0.107256	0.113338	0.343977	0.9(0.72-1.12)	EHA	651/0/1184	172/0/279
Kumasi	Ghana	rs763737	153278307	IRAK1	cerebal malaria	dom	M	-0.336819	0.216364	0.119536	0.71(0.47-1.09)	EHA	366/0/546	53/0/59
Madang	PapuaNewGuinea	rs763737	153278307	IRAK1	cerebal malaria	dom	M	0.991192	1.25135	0.428302	2.69(0.23-31.31)	E	127/0/2	24/0/1
Moshi	Tanzania	rs763737	153278307	IRAK1	cerebal malaria	dom	M	0.481336	0.583817	0.409676	1.62(0.52-5.08)	EHA	74/0/131	5/0/12
Noguchi	Ghana	rs763737	153278307	IRAK1	cerebal malaria	dom	M	-1.71991	0.835215	0.0394709	0.18(0.03-0.92)	EHA	39/0/58	8/0/2
Ougadougou	BurkinaFaso	rs763737	153278307	IRAK1	cerebal malaria	dom	M	0.146129	0.299187	0.625253	1.16(0.64-2.08)	HA	149/0/216	22/0/36
All	All	rs763737	153278307	IRAK1	cerebal malaria	dom	M	-0.0390203	0.0587665	0.506698	0.96(0.86-1.08)	EHA	4059/0/4268	817/0/919
Bamako	Mali	rs763737	153278307	IRAK1	severe malaria1 anaemia	add	All	0.108794	0.117732	0.355443	1.11(0.89-1.4)	SEHA	114/70/129	51/32/81
Banjul	Gambia	rs763737	153278307	IRAK1	severe malaria1 anaemia	add	All	-0.0105742	0.060198	0.860563	0.99(0.88-1.11)	SEHA	1375/786/979	211/98/148
Blantyre	Malawi	rs763737	153278307	IRAK1	severe malaria1 anaemia	add	All	-0.0774964	0.115411	0.501915	0.93(0.74-1.16)	SHA	598/523/1403	29/28/70
Buea	Cameroon	rs763737	153278307	IRAK1	severe malaria1 anaemia	add	All	0.281996	0.161362	0.0805324	1.33(0.97-1.82)	SEHA	240/68/239	20/14/40
Ho_Chi_Minh_City	VietNam	rs763737	153278307	IRAK1	severe malaria1 anaemia	add	All	0.188887	0.226463	0.40424	1.21(0.77-1.88)	SE	1784/356/325	2004-08-19
Ibadan	Nigeria	rs763737	153278307	IRAK1	severe malaria1 anaemia	add	All	-0.251272	0.523879	0.631485	0.78(0.28-2.17)	SEHA	7/14/17	2003-02-02
Kilifi	Kenya	rs763737	153278307	IRAK1	severe malaria1 anaemia	add	All	-0.130418	0.102696	0.204105	0.88(0.72-1.07)	SEHA	920/861/1941	45/27/81
Kumasi	Ghana	rs763737	153278307	IRAK1	severe malaria1 anaemia	add	All	-0.0767113	0.0633057	0.225604	0.93(0.82-1.05)	SEHA	537/422/897	154/122/257
Madang	PapuaNewGuinea	rs763737	153278307	IRAK1	severe malaria1 anaemia	add	All	0.0629508	0.446525	0.887886	1.06(0.44-2.56)	SE	232/8/2	111/3/2
Moshi	Tanzania	rs763737	153278307	IRAK1	severe malaria1 anaemia	add	All	0.056061	0.114298	0.623794	1.06(0.85-1.32)	SEHA	99/106/249	42/36/101
Noguchi	Ghana	rs763737	153278307	IRAK1	severe malaria1 anaemia	add	All	-0.192488	0.122751	0.116853	0.82(0.65-1.05)	SEHA	51/42/89	85/43/109
Ougadougou	BurkinaFaso	rs763737	153278307	IRAK1	severe malaria1 anaemia	add	All	-0.362649	0.205497	0.0776069	0.7(0.47-1.04)	SHA	211/145/355	2012-11-12
All	All	rs763737	153278307	IRAK1	severe malaria1 anaemia	add	All	-0.0327299	0.0316126	0.300508	0.97(0.91-1.03)	SEHA	6168/3401/6625	781/424/908
Bamako	Mali	rs763737	153278307	IRAK1	severe malaria1 anaemia	rec	All	0.187698	0.208952	0.369035	1.21(0.8-1.82)	SEHA	114/70/129	51/32/81
Banjul	Gambia	rs763737	153278307	IRAK1	severe malaria1 anaemia	rec	All	0.039011	0.115555	0.735667	1.04(0.83-1.3)	SEHA	1375/786/979	211/98/148
Blantyre	Malawi	rs763737	153278307	IRAK1	severe malaria1 anaemia	rec	All	-0.137499	0.198841	0.48925	0.87(0.59-1.29)	SHA	598/523/1403	29/28/70
Buea	Cameroon	rs763737	153278307	IRAK1	severe malaria1 anaemia	rec	All	0.54781	0.279777	0.0502273	1.73(1-2.99)	SEHA	240/68/239	20/14/40
Ho_Chi_Minh_City	VietNam	rs763737	153278307	IRAK1	severe malaria1 anaemia	rec	All	0.0765744	0.541091	0.88746	1.08(0.37-3.12)	SE	1784/356/325	2004-08-19
Ibadan	Nigeria	rs763737	153278307	IRAK1	severe malaria1 anaemia	rec	All	-0.212611	0.857599	0.804201	0.81(0.15-4.34)	SEHA	7/14/17	2003-02-02
Kilifi	Kenya	rs763737	153278307	IRAK1	severe malaria1 anaemia	rec	All	-0.125369	0.182886	0.493028	0.88(0.62-1.26)	SEHA	920/861/1941	45/27/81
Kumasi	Ghana	rs763737	153278307	IRAK1	severe malaria1 anaemia	rec	All	-0.161966	0.112594	0.150292	0.85(0.68-1.06)	SEHA	537/422/897	154/122/257
Madang	PapuaNewGuinea	rs763737	153278307	IRAK1	severe malaria1 anaemia	rec	All	0.837323	0.988954	0.397176	2.31(0.33-16.05)	SE	232/8/2	111/3/2
Moshi	Tanzania	rs763737	153278307	IRAK1	severe malaria1 anaemia	rec	All	0.0196189	0.195448	0.920043	1.02(0.7-1.5)	SEHA	99/106/249	42/36/101
Noguchi	Ghana	rs763737	153278307	IRAK1	severe malaria1 anaemia	rec	All	-0.291881	0.21926	0.18312	0.75(0.49-1.15)	SEHA	51/42/89	85/43/109
Ougadougou	BurkinaFaso	rs763737	153278307	IRAK1	severe malaria1 anaemia	rec	All	-0.76502	0.371343	0.039385	0.47(0.22-0.96)	SHA	211/145/355	2012-11-12
All	All	rs763737	153278307	IRAK1	severe malaria1 anaemia	rec	All	-0.0442483	0.0571262	0.438593	0.96(0.86-1.07)	SEHA	6168/3401/6625	781/424/908
Bamako	Mali	rs763737	153278307	IRAK1	severe malaria1 anaemia	dom	All	0.187493	0.229495	0.413938	1.21(0.77-1.89)	SEHA	114/70/129	51/32/81
Banjul	Gambia	rs763737	153278307	IRAK1	severe malaria1 anaemia	dom	All	-0.0672817	0.10615	0.526188	0.93(0.76-1.15)	SEHA	1375/786/979	211/98/148
Blantyre	Malawi	rs763737	153278307	IRAK1	severe malaria1 anaemia	dom	All	-0.117481	0.228762	0.607565	0.89(0.57-1.39)	SHA	598/523/1403	29/28/70
Buea	Cameroon	rs763737	153278307	IRAK1	severe malaria1 anaemia	dom	All	0.405666	0.30871	0.188823	1.5(0.82-2.75)	SEHA	240/68/239	20/14/40
Ho_Chi_Minh_City	VietNam	rs763737	153278307	IRAK1	severe malaria1 anaemia	dom	All	0.41893	0.371029	0.258854	1.52(0.73-3.15)	SE	1784/356/325	2004-08-19
Ibadan	Nigeria	rs763737	153278307	IRAK1	severe malaria1 anaemia	dom	All	-0.669842	1.07549	0.533401	0.51(0.06-4.21)	SEHA	7/14/17	2003-02-02
Kilifi	Kenya	rs763737	153278307	IRAK1	severe malaria1 anaemia	dom	All	-0.346487	0.192827	0.0723545	0.71(0.48-1.03)	SEHA	920/861/1941	45/27/81
Kumasi	Ghana	rs763737	153278307	IRAK1	severe malaria1 anaemia	dom	All	-0.0963536	0.124232	0.437987	0.91(0.71-1.16)	SEHA	537/422/897	154/122/257
Madang	PapuaNewGuinea	rs763737	153278307	IRAK1	severe malaria1 anaemia	dom	All	-0.15091	0.622708	0.808513	0.86(0.25-2.91)	SE	232/8/2	111/3/2
Moshi	Tanzania	rs763737	153278307	IRAK1	severe malaria1 anaemia	dom	All	0.201039	0.236451	0.395194	1.22(0.77-1.94)	SEHA	99/106/249	42/36/101
Noguchi	Ghana	rs763737	153278307	IRAK1	severe malaria1 anaemia	dom	All	-0.385406	0.238315	0.105833	0.68(0.43-1.09)	SEHA	51/42/89	85/43/109
Ougadougou	BurkinaFaso	rs763737	153278307	IRAK1	severe malaria1 anaemia	dom	All	-0.439752	0.403141	0.275354	0.64(0.29-1.42)	SHA	211/145/355	2012-11-12
All	All	rs763737	153278307	IRAK1	severe malaria1 anaemia	dom	All	-0.0686883	0.0597856	0.250593	0.93(0.83-1.05)	SEHA	6168/3401/6625	781/424/908
Bamako	Mali	rs763737	153278307	IRAK1	severe malaria1 anaemia	add	F	-0.0766362	0.217961	0.725134	0.93(0.6-1.42)	EHA	28/70/53	16/32/26
Banjul	Gambia	rs763737	153278307	IRAK1	severe malaria1 anaemia	add	F	-0.00842345	0.105433	0.936322	0.99(0.81-1.22)	EHA	498/786/301	76/98/45
Blantyre	Malawi	rs763737	153278307	IRAK1	severe malaria1 anaemia	add	F	0.0060403	0.200191	0.975929	1.01(0.68-1.49)	HA	162/523/516	7/28/28
Buea	Cameroon	rs763737	153278307	IRAK1	severe malaria1 anaemia	add	F	0.299584	0.265286	0.258777	1.35(0.8-2.27)	EHA	40/68/42	8/14/16
Ho_Chi_Minh_City	VietNam	rs763737	153278307	IRAK1	severe malaria1 anaemia	add	F	0.224124	0.414248	0.588482	1.25(0.56-2.82)	E	736/356/44	2000-08-09
Ibadan	Nigeria	rs763737	153278307	IRAK1	severe malaria1 anaemia	add	F	-0.342269	1.14827	0.765647	0.71(0.07-6.74)	EHA	1/14/5	2001-02-01
Kilifi	Kenya	rs763737	153278307	IRAK1	severe malaria1 anaemia	add	F	0.142687	0.188257	0.448487	1.15(0.8-1.67)	EHA	269/861/757	10/27/33
Kumasi	Ghana	rs763737	153278307	IRAK1	severe malaria1 anaemia	add	F	-0.20415	0.111184	0.0663374	0.82(0.66-1.01)	EHA	171/422/351	49/122/82
Madang	PapuaNewGuinea	rs763737	153278307	IRAK1	severe malaria1 anaemia	add	F	0.0797998	0.578515	0.890289	1.08(0.35-3.37)	E	105/8/0	58/3/1
Moshi	Tanzania	rs763737	153278307	IRAK1	severe malaria1 anaemia	add	F	-0.307958	0.217598	0.156992	0.73(0.48-1.13)	EHA	25/106/118	11/36/25
Noguchi	Ghana	rs763737	153278307	IRAK1	severe malaria1 anaemia	add	F	-0.290055	0.244798	0.236067	0.75(0.46-1.21)	EHA	12/42/31	19/43/28
Ougadougou	BurkinaFaso	rs763737	153278307	IRAK1	severe malaria1 anaemia	add	F	-0.607803	0.34323	0.0765883	0.54(0.28-1.07)	HA	62/145/139	2004-11-04
All	All	rs763737	153278307	IRAK1	severe malaria1 anaemia	add	F	-0.0828551	0.0560746	0.139518	0.92(0.82-1.03)	EHA	2109/3401/2357	268/424/289
Bamako	Mali	rs763737	153278307	IRAK1	severe malaria1 anaemia	rec	F	-0.0711676	0.329093	0.82879	0.93(0.49-1.78)	EHA	28/70/53	16/32/26
Banjul	Gambia	rs763737	153278307	IRAK1	severe malaria1 anaemia	rec	F	0.13613	0.184054	0.45953	1.15(0.8-1.64)	EHA	498/786/301	76/98/45
Blantyre	Malawi	rs763737	153278307	IRAK1	severe malaria1 anaemia	rec	F	-0.0430342	0.27347	0.874958	0.96(0.56-1.64)	HA	162/523/516	7/28/28
Buea	Cameroon	rs763737	153278307	IRAK1	severe malaria1 anaemia	rec	F	0.535127	0.401011	0.182058	1.71(0.78-3.75)	EHA	40/68/42	8/14/16
Ho_Chi_Minh_City	VietNam	rs763737	153278307	IRAK1	severe malaria1 anaemia	rec	F	-14.3672	966.355	0.988138	0(0-Inf)	E	736/356/44	2000-08-09
Ibadan	Nigeria	rs763737	153278307	IRAK1	severe malaria1 anaemia	rec	F	-0.0510607	1.41847	0.971285	0.95(0.06-15.32)	EHA	1/14/5	2001-02-01
Kilifi	Kenya	rs763737	153278307	IRAK1	severe malaria1 anaemia	rec	F	0.295374	0.253753	0.244416	1.34(0.82-2.21)	EHA	269/861/757	10/27/33
Kumasi	Ghana	rs763737	153278307	IRAK1	severe malaria1 anaemia	rec	F	-0.321225	0.170043	0.0588812	0.73(0.52-1.01)	EHA	171/422/351	49/122/82
Madang	PapuaNewGuinea	rs763737	153278307	IRAK1	severe malaria1 anaemia	rec	F	18.2372	3956.18	0.996322	83239850.23(0-Inf)	E	105/8/0	58/3/1
Moshi	Tanzania	rs763737	153278307	IRAK1	severe malaria1 anaemia	rec	F	-0.432349	0.304068	0.15506	0.65(0.36-1.18)	EHA	25/106/118	11/36/25
Noguchi	Ghana	rs763737	153278307	IRAK1	severe malaria1 anaemia	rec	F	-0.263713	0.354605	0.45707	0.77(0.38-1.54)	EHA	12/42/31	19/43/28
Ougadougou	BurkinaFaso	rs763737	153278307	IRAK1	severe malaria1 anaemia	rec	F	-1.12671	0.58728	0.0550456	0.32(0.1-1.02)	HA	62/145/139	2004-11-04
All	All	rs763737	153278307	IRAK1	severe malaria1 anaemia	rec	F	-0.0919128	0.0869987	0.290747	0.91(0.77-1.08)	EHA	2109/3401/2357	268/424/289
Bamako	Mali	rs763737	153278307	IRAK1	severe malaria1 anaemia	dom	F	-0.141356	0.383163	0.712189	0.87(0.41-1.84)	EHA	28/70/53	16/32/26
Banjul	Gambia	rs763737	153278307	IRAK1	severe malaria1 anaemia	dom	F	-0.113981	0.155329	0.463071	0.89(0.66-1.21)	EHA	498/786/301	76/98/45
Blantyre	Malawi	rs763737	153278307	IRAK1	severe malaria1 anaemia	dom	F	0.122888	0.419066	0.769337	1.13(0.5-2.57)	HA	162/523/516	7/28/28
Buea	Cameroon	rs763737	153278307	IRAK1	severe malaria1 anaemia	dom	F	0.229349	0.464853	0.621744	1.26(0.51-3.13)	EHA	40/68/42	8/14/16
Ho_Chi_Minh_City	VietNam	rs763737	153278307	IRAK1	severe malaria1 anaemia	dom	F	0.468333	0.492734	0.34187	1.6(0.61-4.2)	E	736/356/44	2000-08-09
Ibadan	Nigeria	rs763737	153278307	IRAK1	severe malaria1 anaemia	dom	F	-1.08876	2.14945	0.612486	0.34(0-22.74)	EHA	1/14/5	2001-02-01
Kilifi	Kenya	rs763737	153278307	IRAK1	severe malaria1 anaemia	dom	F	-0.0556765	0.357055	0.876086	0.95(0.47-1.9)	EHA	269/861/757	10/27/33
Kumasi	Ghana	rs763737	153278307	IRAK1	severe malaria1 anaemia	dom	F	-0.207401	0.200852	0.301788	0.81(0.55-1.2)	EHA	171/422/351	49/122/82
Madang	PapuaNewGuinea	rs763737	153278307	IRAK1	severe malaria1 anaemia	dom	F	-0.188191	0.675824	0.780658	0.83(0.22-3.12)	E	105/8/0	58/3/1
Moshi	Tanzania	rs763737	153278307	IRAK1	severe malaria1 anaemia	dom	F	-0.315603	0.422988	0.45559	0.73(0.32-1.67)	EHA	25/106/118	11/36/25
Noguchi	Ghana	rs763737	153278307	IRAK1	severe malaria1 anaemia	dom	F	-0.522316	0.43649	0.231452	0.59(0.25-1.4)	EHA	12/42/31	19/43/28
Ougadougou	BurkinaFaso	rs763737	153278307	IRAK1	severe malaria1 anaemia	dom	F	-0.462623	0.607946	0.446681	0.63(0.19-2.07)	HA	62/145/139	2004-11-04
All	All	rs763737	153278307	IRAK1	severe malaria1 anaemia	dom	F	-0.127664	0.0944481	0.176478	0.88(0.73-1.06)	EHA	2109/3401/2357	268/424/289
Bamako	Mali	rs763737	153278307	IRAK1	severe malaria1 anaemia	het	F	-0.0269384	0.302896	0.929133	0.97(0.54-1.76)	EHA	28/70/53	16/32/26
Banjul	Gambia	rs763737	153278307	IRAK1	severe malaria1 anaemia	het	F	-0.185259	0.147402	0.208816	0.83(0.62-1.11)	EHA	498/786/301	76/98/45
Blantyre	Malawi	rs763737	153278307	IRAK1	severe malaria1 anaemia	het	F	0.0915093	0.264284	0.729152	1.1(0.65-1.84)	HA	162/523/516	7/28/28
Buea	Cameroon	rs763737	153278307	IRAK1	severe malaria1 anaemia	het	F	-0.314464	0.387601	0.417188	0.73(0.34-1.56)	EHA	40/68/42	8/14/16
Ho_Chi_Minh_City	VietNam	rs763737	153278307	IRAK1	severe malaria1 anaemia	het	F	0.639149	0.492658	0.194511	1.89(0.72-4.98)	E	736/356/44	2000-08-09
Ibadan	Nigeria	rs763737	153278307	IRAK1	severe malaria1 anaemia	het	F	-0.313496	1.20624	0.794944	0.73(0.07-7.77)	EHA	1/14/5	2001-02-01
Kilifi	Kenya	rs763737	153278307	IRAK1	severe malaria1 anaemia	het	F	-0.314269	0.255291	0.218314	0.73(0.44-1.2)	EHA	269/861/757	10/27/33
Kumasi	Ghana	rs763737	153278307	IRAK1	severe malaria1 anaemia	het	F	0.162839	0.158038	0.302832	1.18(0.86-1.6)	EHA	171/422/351	49/122/82
Madang	PapuaNewGuinea	rs763737	153278307	IRAK1	severe malaria1 anaemia	het	F	-0.552401	0.746119	0.459078	0.58(0.13-2.48)	E	105/8/0	58/3/1
Moshi	Tanzania	rs763737	153278307	IRAK1	severe malaria1 anaemia	het	F	0.254872	0.288117	0.376366	1.29(0.73-2.27)	EHA	25/106/118	11/36/25
Noguchi	Ghana	rs763737	153278307	IRAK1	severe malaria1 anaemia	het	F	-0.0710729	0.319254	0.82383	0.93(0.5-1.74)	EHA	12/42/31	19/43/28
Ougadougou	BurkinaFaso	rs763737	153278307	IRAK1	severe malaria1 anaemia	het	F	0.671898	0.480153	0.161711	1.96(0.76-5.02)	HA	62/145/139	2004-11-04
All	All	rs763737	153278307	IRAK1	severe malaria1 anaemia	het	F	-0.010801	0.0770818	0.888562	0.99(0.85-1.15)	EHA	2109/3401/2357	268/424/289
Bamako	Mali	rs763737	153278307	IRAK1	severe malaria1 anaemia	dom	M	0.413886	0.28328	0.144002	1.51(0.87-2.64)	EHA	86/0/76	35/0/55
Banjul	Gambia	rs763737	153278307	IRAK1	severe malaria1 anaemia	dom	M	-0.0173583	0.143973	0.904035	0.98(0.74-1.3)	EHA	877/0/678	135/0/103
Blantyre	Malawi	rs763737	153278307	IRAK1	severe malaria1 anaemia	dom	M	-0.243789	0.289757	0.400149	0.78(0.44-1.38)	HA	436/0/887	22/0/42
Buea	Cameroon	rs763737	153278307	IRAK1	severe malaria1 anaemia	dom	M	0.552666	0.390422	0.156904	1.74(0.81-3.74)	EHA	200/0/197	12/0/24
Ho_Chi_Minh_City	VietNam	rs763737	153278307	IRAK1	severe malaria1 anaemia	dom	M	0.338565	0.599366	0.572161	1.4(0.43-4.54)	E	1048/0/281	10/0/4
Ibadan	Nigeria	rs763737	153278307	IRAK1	severe malaria1 anaemia	dom	M	-0.119362	1.35419	0.929764	0.89(0.06-12.61)	HA	6/0/12	1/0/2
Kilifi	Kenya	rs763737	153278307	IRAK1	severe malaria1 anaemia	dom	M	-0.490009	0.241538	0.0424886	0.61(0.38-0.98)	EHA	651/0/1184	35/0/48
Kumasi	Ghana	rs763737	153278307	IRAK1	severe malaria1 anaemia	dom	M	-0.0289375	0.156273	0.853094	0.97(0.72-1.32)	EHA	366/0/546	105/0/175
Madang	PapuaNewGuinea	rs763737	153278307	IRAK1	severe malaria1 anaemia	dom	M	0.218002	1.23933	0.86037	1.24(0.11-14.11)	E	127/0/2	53/0/1
Moshi	Tanzania	rs763737	153278307	IRAK1	severe malaria1 anaemia	dom	M	0.454126	0.282476	0.107909	1.57(0.91-2.74)	EHA	74/0/131	31/0/76
Noguchi	Ghana	rs763737	153278307	IRAK1	severe malaria1 anaemia	dom	M	-0.310057	0.283186	0.273565	0.73(0.42-1.28)	EHA	39/0/58	66/0/81
Ougadougou	BurkinaFaso	rs763737	153278307	IRAK1	severe malaria1 anaemia	dom	M	-0.435323	0.528014	0.409682	0.65(0.23-1.82)	HA	149/0/216	8/0/8
All	All	rs763737	153278307	IRAK1	severe malaria1 anaemia	dom	M	-0.0150266	0.0766539	0.844586	0.99(0.85-1.14)	EHA	4059/0/4268	513/0/619
Bamako	Mali	rs763737	153278307	IRAK1	cerebral malaria and severe malaria1 anaemia	add	All	0.191221	0.185238	0.301932	1.21(0.84-1.74)	SEHA	114/70/129	18/18/30
Banjul	Gambia	rs763737	153278307	IRAK1	cerebral malaria and severe malaria1 anaemia	add	All	-0.0656599	0.102489	0.52175	0.94(0.77-1.14)	SEHA	1375/786/979	62/38/34
Blantyre	Malawi	rs763737	153278307	IRAK1	cerebral malaria and severe malaria1 anaemia	add	All	-0.0431731	0.106656	0.685632	0.96(0.78-1.18)	SHA	598/523/1403	33/35/88
Buea	Cameroon	rs763737	153278307	IRAK1	cerebral malaria and severe malaria1 anaemia	add	All	0.154897	0.575307	0.787743	1.17(0.38-3.61)	SEHA	240/68/239	2003-01-02
Ho_Chi_Minh_City	VietNam	rs763737	153278307	IRAK1	cerebral malaria and severe malaria1 anaemia	add	All	-0.0535018	0.712739	0.940163	0.95(0.23-3.83)	SE	1784/356/325	2001-01-06
Ibadan	Nigeria	rs763737	153278307	IRAK1	cerebral malaria and severe malaria1 anaemia	add	All	4.57735e-15	0.218868	1	1(0.65-1.54)	SEHA	7/14/17	0/0/0
Kilifi	Kenya	rs763737	153278307	IRAK1	cerebral malaria and severe malaria1 anaemia	add	All	0.077456	0.0937605	0.408744	1.08(0.9-1.3)	SEHA	920/861/1941	52/37/119
Kumasi	Ghana	rs763737	153278307	IRAK1	cerebral malaria and severe malaria1 anaemia	add	All	0.0380782	0.136984	0.781031	1.04(0.79-1.36)	SEHA	537/422/897	1941-12-22
Madang	PapuaNewGuinea	rs763737	153278307	IRAK1	cerebral malaria and severe malaria1 anaemia	add	All	-16.1881	0.909418	7.00517e-71	0(0-0)	SE	232/8/2	9/0/0
Moshi	Tanzania	rs763737	153278307	IRAK1	cerebral malaria and severe malaria1 anaemia	add	All	0.287903	0.289888	0.320635	1.33(0.76-2.35)	SEHA	99/106/249	2017-07-03
Noguchi	Ghana	rs763737	153278307	IRAK1	cerebral malaria and severe malaria1 anaemia	add	All	0.723978	0.417348	0.0827921	2.06(0.91-4.67)	SEHA	51/42/89	2009-02-02
Ougadougou	BurkinaFaso	rs763737	153278307	IRAK1	cerebral malaria and severe malaria1 anaemia	add	All	-0.535499	0.267138	0.0450085	0.59(0.35-0.99)	SHA	211/145/355	2007-03-10
All	All	rs763737	153278307	IRAK1	cerebral malaria and severe malaria1 anaemia	add	All	0.0218875	0.0483995	0.651105	1.02(0.93-1.12)	SEHA	5936/3393/6623	210/154/349
Bamako	Mali	rs763737	153278307	IRAK1	cerebral malaria and severe malaria1 anaemia	rec	All	0.212541	0.320858	0.507705	1.24(0.66-2.32)	SEHA	114/70/129	18/18/30
Banjul	Gambia	rs763737	153278307	IRAK1	cerebral malaria and severe malaria1 anaemia	rec	All	-0.258839	0.208468	0.214376	0.77(0.51-1.16)	SEHA	1375/786/979	62/38/34
Blantyre	Malawi	rs763737	153278307	IRAK1	cerebral malaria and severe malaria1 anaemia	rec	All	-0.156534	0.186188	0.400501	0.86(0.59-1.23)	SHA	598/523/1403	33/35/88
Buea	Cameroon	rs763737	153278307	IRAK1	cerebral malaria and severe malaria1 anaemia	rec	All	0.408943	1.03729	0.693404	1.51(0.2-11.5)	SEHA	240/68/239	2003-01-02
Ho_Chi_Minh_City	VietNam	rs763737	153278307	IRAK1	cerebral malaria and severe malaria1 anaemia	rec	All	0.859022	1.26524	0.497175	2.36(0.2-28.19)	SE	1784/356/325	2001-01-06
Ibadan	Nigeria	rs763737	153278307	IRAK1	cerebral malaria and severe malaria1 anaemia	rec	All	8.47543e-15	0.3646	1	1(0.49-2.04)	SEHA	7/14/17	0/0/0
Kilifi	Kenya	rs763737	153278307	IRAK1	cerebral malaria and severe malaria1 anaemia	rec	All	0.223942	0.154349	0.146814	1.25(0.92-1.69)	SEHA	920/861/1941	52/37/119
Kumasi	Ghana	rs763737	153278307	IRAK1	cerebral malaria and severe malaria1 anaemia	rec	All	0.00347681	0.255958	0.989162	1(0.61-1.66)	SEHA	537/422/897	1941-12-22
Madang	PapuaNewGuinea	rs763737	153278307	IRAK1	cerebral malaria and severe malaria1 anaemia	rec	All	-15.8806	0.94319	1.30499e-63	0(0-0)	SE	232/8/2	9/0/0
Moshi	Tanzania	rs763737	153278307	IRAK1	cerebral malaria and severe malaria1 anaemia	rec	All	0.284453	0.440742	0.518671	1.33(0.56-3.15)	SEHA	99/106/249	2017-07-03
Noguchi	Ghana	rs763737	153278307	IRAK1	cerebral malaria and severe malaria1 anaemia	rec	All	1.30954	0.600714	0.0292593	3.7(1.14-12.02)	SEHA	51/42/89	2009-02-02
Ougadougou	BurkinaFaso	rs763737	153278307	IRAK1	cerebral malaria and severe malaria1 anaemia	rec	All	-0.789724	0.483627	0.102486	0.45(0.18-1.17)	SHA	211/145/355	2007-03-10
All	All	rs763737	153278307	IRAK1	cerebral malaria and severe malaria1 anaemia	rec	All	0.0263474	0.0849372	0.75641	1.03(0.87-1.21)	SEHA	5936/3393/6623	210/154/349
Bamako	Mali	rs763737	153278307	IRAK1	cerebral malaria and severe malaria1 anaemia	dom	All	0.454885	0.359493	0.205745	1.58(0.78-3.19)	SEHA	114/70/129	18/18/30
Banjul	Gambia	rs763737	153278307	IRAK1	cerebral malaria and severe malaria1 anaemia	dom	All	0.00387518	0.183859	0.983184	1(0.7-1.44)	SEHA	1375/786/979	62/38/34
Blantyre	Malawi	rs763737	153278307	IRAK1	cerebral malaria and severe malaria1 anaemia	dom	All	0.041072	0.218083	0.850617	1.04(0.68-1.6)	SHA	598/523/1403	33/35/88
Buea	Cameroon	rs763737	153278307	IRAK1	cerebral malaria and severe malaria1 anaemia	dom	All	0.0920772	0.937452	0.921757	1.1(0.17-6.89)	SEHA	240/68/239	2003-01-02
Ho_Chi_Minh_City	VietNam	rs763737	153278307	IRAK1	cerebral malaria and severe malaria1 anaemia	dom	All	-0.410581	0.81208	0.613143	0.66(0.14-3.26)	SE	1784/356/325	2001-01-06
Ibadan	Nigeria	rs763737	153278307	IRAK1	cerebral malaria and severe malaria1 anaemia	dom	All	7.45149e-16	0.455321	1	1(0.41-2.44)	SEHA	7/14/17	0/0/0
Kilifi	Kenya	rs763737	153278307	IRAK1	cerebral malaria and severe malaria1 anaemia	dom	All	-0.00045883	0.182743	0.997997	1(0.7-1.43)	SEHA	920/861/1941	52/37/119
Kumasi	Ghana	rs763737	153278307	IRAK1	cerebral malaria and severe malaria1 anaemia	dom	All	0.146584	0.274245	0.592995	1.16(0.68-1.98)	SEHA	537/422/897	1941-12-22
Madang	PapuaNewGuinea	rs763737	153278307	IRAK1	cerebral malaria and severe malaria1 anaemia	dom	All	-16.563	0.831089	2.26773e-88	0(0-0)	SE	232/8/2	9/0/0
Moshi	Tanzania	rs763737	153278307	IRAK1	cerebral malaria and severe malaria1 anaemia	dom	All	0.819296	0.743563	0.270526	2.27(0.53-9.74)	SEHA	99/106/249	2017-07-03
Noguchi	Ghana	rs763737	153278307	IRAK1	cerebral malaria and severe malaria1 anaemia	dom	All	0.873998	0.855515	0.306968	2.4(0.45-12.82)	SEHA	51/42/89	2009-02-02
Ougadougou	BurkinaFaso	rs763737	153278307	IRAK1	cerebral malaria and severe malaria1 anaemia	dom	All	-1.06148	0.480597	0.0271981	0.35(0.13-0.89)	SHA	211/145/355	2007-03-10
All	All	rs763737	153278307	IRAK1	cerebral malaria and severe malaria1 anaemia	dom	All	0.0502103	0.0943128	0.594463	1.05(0.87-1.26)	SEHA	5936/3393/6623	210/154/349
Bamako	Mali	rs763737	153278307	IRAK1	cerebral malaria and severe malaria1 anaemia	add	F	0.440696	0.312436	0.158387	1.55(0.84-2.87)	EHA	28/70/53	3/18/14
Banjul	Gambia	rs763737	153278307	IRAK1	cerebral malaria and severe malaria1 anaemia	add	F	-0.0575834	0.191213	0.763302	0.94(0.65-1.37)	EHA	498/786/301	19/38/7
Blantyre	Malawi	rs763737	153278307	IRAK1	cerebral malaria and severe malaria1 anaemia	add	F	-0.0579596	0.188245	0.758163	0.94(0.65-1.36)	HA	162/523/516	7/35/27
Buea	Cameroon	rs763737	153278307	IRAK1	cerebral malaria and severe malaria1 anaemia	add	F	1.5112	1.08031	0.161855	4.53(0.55-37.66)	EHA	40/68/42	0/1/2
Ho_Chi_Minh_City	VietNam	rs763737	153278307	IRAK1	cerebral malaria and severe malaria1 anaemia	add	F	0.114616	0.65008	0.86005	1.12(0.31-4.01)	E	736/356/44	2001-01-05
Ibadan	Nigeria	rs763737	153278307	IRAK1	cerebral malaria and severe malaria1 anaemia	add	F	-3.62805e-15	102109	1	1(0-Inf)	EHA	1/14/5	0/0/0
Kilifi	Kenya	rs763737	153278307	IRAK1	cerebral malaria and severe malaria1 anaemia	add	F	0.0435388	0.15117	0.773337	1.04(0.78-1.4)	EHA	269/861/757	19/37/49
Kumasi	Ghana	rs763737	153278307	IRAK1	cerebral malaria and severe malaria1 anaemia	add	F	0.171256	0.320125	0.592674	1.19(0.63-2.22)	EHA	171/422/351	2010-12-04
Madang	PapuaNewGuinea	rs763737	153278307	IRAK1	cerebral malaria and severe malaria1 anaemia	add	F	-16.7998	3363.84	0.996015	0(0-Inf)	E	105/8/0	5/0/0
Moshi	Tanzania	rs763737	153278307	IRAK1	cerebral malaria and severe malaria1 anaemia	add	F	-0.404339	0.420658	0.336448	0.67(0.29-1.52)	EHA	25/106/118	2005-07-02
Noguchi	Ghana	rs763737	153278307	IRAK1	cerebral malaria and severe malaria1 anaemia	add	F	0.18628	0.610005	0.760081	1.2(0.36-3.98)	EHA	12/42/31	2003-02-02
Ougadougou	BurkinaFaso	rs763737	153278307	IRAK1	cerebral malaria and severe malaria1 anaemia	add	F	-0.572105	0.48151	0.234775	0.56(0.22-1.45)	HA	62/145/139	2003-03-03
All	All	rs763737	153278307	IRAK1	cerebral malaria and severe malaria1 anaemia	add	F	0.0253475	0.0855609	0.767038	1.03(0.87-1.21)	EHA	2004/3393/2357	64/154/121
Bamako	Mali	rs763737	153278307	IRAK1	cerebral malaria and severe malaria1 anaemia	rec	F	0.322133	0.439075	0.463154	1.38(0.58-3.26)	EHA	28/70/53	3/18/14
Banjul	Gambia	rs763737	153278307	IRAK1	cerebral malaria and severe malaria1 anaemia	rec	F	-0.514668	0.409681	0.20902	0.6(0.27-1.33)	EHA	498/786/301	19/38/7
Blantyre	Malawi	rs763737	153278307	IRAK1	cerebral malaria and severe malaria1 anaemia	rec	F	-0.231686	0.264433	0.380942	0.79(0.47-1.33)	HA	162/523/516	7/35/27
Buea	Cameroon	rs763737	153278307	IRAK1	cerebral malaria and severe malaria1 anaemia	rec	F	1.69823	1.25413	0.1757	5.46(0.47-63.83)	EHA	40/68/42	0/1/2
Ho_Chi_Minh_City	VietNam	rs763737	153278307	IRAK1	cerebral malaria and severe malaria1 anaemia	rec	F	1.40788	1.09153	0.197112	4.09(0.48-34.72)	E	736/356/44	2001-01-05
Ibadan	Nigeria	rs763737	153278307	IRAK1	cerebral malaria and severe malaria1 anaemia	rec	F	-4.4998e-15	116830	1	1(0-Inf)	EHA	1/14/5	0/0/0
Kilifi	Kenya	rs763737	153278307	IRAK1	cerebral malaria and severe malaria1 anaemia	rec	F	0.248722	0.20898	0.233979	1.28(0.85-1.93)	EHA	269/861/757	19/37/49
Kumasi	Ghana	rs763737	153278307	IRAK1	cerebral malaria and severe malaria1 anaemia	rec	F	0.0100915	0.460109	0.982501	1.01(0.41-2.49)	EHA	171/422/351	2010-12-04
Madang	PapuaNewGuinea	rs763737	153278307	IRAK1	cerebral malaria and severe malaria1 anaemia	rec	F	NA	NA	NA	NA(NA-NA)	E	105/8/0	5/0/0
Moshi	Tanzania	rs763737	153278307	IRAK1	cerebral malaria and severe malaria1 anaemia	rec	F	-0.556581	0.606433	0.358727	0.57(0.17-1.88)	EHA	25/106/118	2005-07-02
Noguchi	Ghana	rs763737	153278307	IRAK1	cerebral malaria and severe malaria1 anaemia	rec	F	0.764396	0.875795	0.382771	2.15(0.39-11.95)	EHA	12/42/31	2003-02-02
Ougadougou	BurkinaFaso	rs763737	153278307	IRAK1	cerebral malaria and severe malaria1 anaemia	rec	F	-0.447849	0.730558	0.539861	0.64(0.15-2.68)	HA	62/145/139	2003-03-03
All	All	rs763737	153278307	IRAK1	cerebral malaria and severe malaria1 anaemia	rec	F	0.0156493	0.126319	0.901405	1.02(0.79-1.3)	EHA	2004/3393/2357	64/154/121
Bamako	Mali	rs763737	153278307	IRAK1	cerebral malaria and severe malaria1 anaemia	dom	F	1.06271	0.668373	0.111837	2.89(0.78-10.73)	EHA	28/70/53	3/18/14
Banjul	Gambia	rs763737	153278307	IRAK1	cerebral malaria and severe malaria1 anaemia	dom	F	0.166025	0.286731	0.562572	1.18(0.67-2.07)	EHA	498/786/301	19/38/7
Blantyre	Malawi	rs763737	153278307	IRAK1	cerebral malaria and severe malaria1 anaemia	dom	F	0.275243	0.414703	0.506875	1.32(0.58-2.97)	HA	162/523/516	7/35/27
Buea	Cameroon	rs763737	153278307	IRAK1	cerebral malaria and severe malaria1 anaemia	dom	F	17.9424	4296.99	0.996668	61987501.29(0-Inf)	EHA	40/68/42	0/1/2
Ho_Chi_Minh_City	VietNam	rs763737	153278307	IRAK1	cerebral malaria and severe malaria1 anaemia	dom	F	-0.304624	0.839101	0.716578	0.74(0.14-3.82)	E	736/356/44	2001-01-05
Ibadan	Nigeria	rs763737	153278307	IRAK1	cerebral malaria and severe malaria1 anaemia	dom	F	5.97045e-15	277982	1	1(0-Inf)	EHA	1/14/5	0/0/0
Kilifi	Kenya	rs763737	153278307	IRAK1	cerebral malaria and severe malaria1 anaemia	dom	F	-0.297456	0.272815	0.275572	0.74(0.44-1.27)	EHA	269/861/757	19/37/49
Kumasi	Ghana	rs763737	153278307	IRAK1	cerebral malaria and severe malaria1 anaemia	dom	F	0.720931	0.753272	0.338534	2.06(0.47-9)	EHA	171/422/351	2010-12-04
Madang	PapuaNewGuinea	rs763737	153278307	IRAK1	cerebral malaria and severe malaria1 anaemia	dom	F	-16.7998	3363.84	0.996015	0(0-Inf)	E	105/8/0	5/0/0
Moshi	Tanzania	rs763737	153278307	IRAK1	cerebral malaria and severe malaria1 anaemia	dom	F	-0.483926	0.830209	0.559962	0.62(0.12-3.14)	EHA	25/106/118	2005-07-02
Noguchi	Ghana	rs763737	153278307	IRAK1	cerebral malaria and severe malaria1 anaemia	dom	F	-0.470656	0.986374	0.63325	0.62(0.09-4.32)	EHA	12/42/31	2003-02-02
Ougadougou	BurkinaFaso	rs763737	153278307	IRAK1	cerebral malaria and severe malaria1 anaemia	dom	F	-1.12188	0.771481	0.145894	0.33(0.07-1.48)	HA	62/145/139	2003-03-03
All	All	rs763737	153278307	IRAK1	cerebral malaria and severe malaria1 anaemia	dom	F	0.0584831	0.154315	0.704698	1.06(0.78-1.43)	EHA	2004/3393/2357	64/154/121
Bamako	Mali	rs763737	153278307	IRAK1	cerebral malaria and severe malaria1 anaemia	het	F	0.235647	0.409018	0.564528	1.27(0.57-2.82)	EHA	28/70/53	3/18/14
Banjul	Gambia	rs763737	153278307	IRAK1	cerebral malaria and severe malaria1 anaemia	het	F	0.391362	0.264387	0.138803	1.48(0.88-2.48)	EHA	498/786/301	19/38/7
Blantyre	Malawi	rs763737	153278307	IRAK1	cerebral malaria and severe malaria1 anaemia	het	F	0.324574	0.25104	0.196039	1.38(0.85-2.26)	HA	162/523/516	7/35/27
Buea	Cameroon	rs763737	153278307	IRAK1	cerebral malaria and severe malaria1 anaemia	het	F	-0.447316	1.24451	0.719273	0.64(0.06-7.33)	EHA	40/68/42	0/1/2
Ho_Chi_Minh_City	VietNam	rs763737	153278307	IRAK1	cerebral malaria and severe malaria1 anaemia	het	F	-1.0033	1.08213	0.353847	0.37(0.04-3.06)	E	736/356/44	2001-01-05
Ibadan	Nigeria	rs763737	153278307	IRAK1	cerebral malaria and severe malaria1 anaemia	het	F	3.64727e-15	114332	1	1(0-Inf)	EHA	1/14/5	0/0/0
Kilifi	Kenya	rs763737	153278307	IRAK1	cerebral malaria and severe malaria1 anaemia	het	F	-0.40797	0.213074	0.0555318	0.66(0.44-1.01)	EHA	269/861/757	19/37/49
Kumasi	Ghana	rs763737	153278307	IRAK1	cerebral malaria and severe malaria1 anaemia	het	F	0.317986	0.443851	0.47373	1.37(0.58-3.28)	EHA	171/422/351	2010-12-04
Madang	PapuaNewGuinea	rs763737	153278307	IRAK1	cerebral malaria and severe malaria1 anaemia	het	F	-16.7998	3363.84	0.996015	0(0-Inf)	E	105/8/0	5/0/0
Moshi	Tanzania	rs763737	153278307	IRAK1	cerebral malaria and severe malaria1 anaemia	het	F	0.331026	0.584582	0.571217	1.39(0.44-4.38)	EHA	25/106/118	2005-07-02
Noguchi	Ghana	rs763737	153278307	IRAK1	cerebral malaria and severe malaria1 anaemia	het	F	-1.03151	0.905047	0.254399	0.36(0.06-2.1)	EHA	12/42/31	2003-02-02
Ougadougou	BurkinaFaso	rs763737	153278307	IRAK1	cerebral malaria and severe malaria1 anaemia	het	F	-0.345506	0.717018	0.629901	0.71(0.17-2.89)	HA	62/145/139	2003-03-03
All	All	rs763737	153278307	IRAK1	cerebral malaria and severe malaria1 anaemia	het	F	0.0203418	0.116052	0.860858	1.02(0.81-1.28)	EHA	2004/3393/2357	64/154/121
Bamako	Mali	rs763737	153278307	IRAK1	cerebral malaria and severe malaria1 anaemia	dom	M	0.190439	0.441426	0.666164	1.21(0.51-2.87)	EHA	86/0/76	15/0/16
Banjul	Gambia	rs763737	153278307	IRAK1	cerebral malaria and severe malaria1 anaemia	dom	M	-0.150627	0.259925	0.56225	0.86(0.52-1.43)	EHA	877/0/678	43/0/27
Blantyre	Malawi	rs763737	153278307	IRAK1	cerebral malaria and severe malaria1 anaemia	dom	M	-0.0709959	0.258211	0.783353	0.93(0.56-1.55)	HA	436/0/887	26/0/61
Buea	Cameroon	rs763737	153278307	IRAK1	cerebral malaria and severe malaria1 anaemia	dom	M	-0.944473	1.277	0.459542	0.39(0.03-4.75)	EHA	200/0/197	2/0/1
Ho_Chi_Minh_City	VietNam	rs763737	153278307	IRAK1	cerebral malaria and severe malaria1 anaemia	dom	M	-16.5544	4677.38	0.997176	0(0-Inf)	E	1048/0/281	1/0/0
Ibadan	Nigeria	rs763737	153278307	IRAK1	cerebral malaria and severe malaria1 anaemia	dom	M	3.60115e-16	108000	1	1(0-Inf)	HA	6/0/12	0/0/0
Kilifi	Kenya	rs763737	153278307	IRAK1	cerebral malaria and severe malaria1 anaemia	dom	M	0.207013	0.228649	0.365267	1.23(0.79-1.93)	EHA	651/0/1184	33/0/70
Kumasi	Ghana	rs763737	153278307	IRAK1	cerebral malaria and severe malaria1 anaemia	dom	M	0.00344845	0.32555	0.991548	1(0.53-1.9)	EHA	366/0/546	18/0/31
Madang	PapuaNewGuinea	rs763737	153278307	IRAK1	cerebral malaria and severe malaria1 anaemia	dom	M	-16.09	7604.24	0.998312	0(0-Inf)	E	127/0/2	4/0/0
Moshi	Tanzania	rs763737	153278307	IRAK1	cerebral malaria and severe malaria1 anaemia	dom	M	1.92397	1.08607	0.076479	6.85(0.81-57.55)	EHA	74/0/131	1/0/12
Noguchi	Ghana	rs763737	153278307	IRAK1	cerebral malaria and severe malaria1 anaemia	dom	M	18.1672	2556.83	0.994331	77611926.73(0-Inf)	EHA	39/0/58	0/0/6
Ougadougou	BurkinaFaso	rs763737	153278307	IRAK1	cerebral malaria and severe malaria1 anaemia	dom	M	-1.04106	0.665042	0.117487	0.35(0.1-1.3)	HA	149/0/216	7/0/4
All	All	rs763737	153278307	IRAK1	cerebral malaria and severe malaria1 anaemia	dom	M	0.0168827	0.119231	0.887398	1.02(0.81-1.28)	EHA	2845/0/3927	145/0/222
Bamako	Mali	rs763737	153278307	IRAK1	other severe malaria	add	All	0.261183	0.138744	0.0597711	1.3(0.99-1.7)	SEHA	114/70/129	26/26/50
Banjul	Gambia	rs763737	153278307	IRAK1	other severe malaria	add	All	0.0254607	0.0424768	0.548905	1.03(0.94-1.11)	SEHA	1375/786/979	473/237/351
Blantyre	Malawi	rs763737	153278307	IRAK1	other severe malaria	add	All	0.15392	0.0912255	0.0915548	1.17(0.98-1.39)	SHA	598/523/1403	38/51/128
Buea	Cameroon	rs763737	153278307	IRAK1	other severe malaria	add	All	0.183284	0.0739412	0.013183	1.2(1.04-1.39)	SEHA	240/68/239	155/99/218
Ho_Chi_Minh_City	VietNam	rs763737	153278307	IRAK1	other severe malaria	add	All	0.0276833	0.0629767	0.660241	1.03(0.91-1.16)	SE	1784/356/325	403/44/95
Ibadan	Nigeria	rs763737	153278307	IRAK1	other severe malaria	add	All	0.153093	0.258691	0.553985	1.17(0.7-1.94)	SEHA	7/14/17	1934-10-19
Kilifi	Kenya	rs763737	153278307	IRAK1	other severe malaria	add	All	-0.0406089	0.0463744	0.381207	0.96(0.88-1.05)	SEHA	920/861/1941	254/173/500
Kumasi	Ghana	rs763737	153278307	IRAK1	other severe malaria	add	All	-0.0321972	0.0574906	0.57545	0.97(0.87-1.08)	SEHA	537/422/897	190/123/301
Madang	PapuaNewGuinea	rs763737	153278307	IRAK1	other severe malaria	add	All	-0.28371	0.434298	0.513587	0.75(0.32-1.76)	SE	232/8/2	208/5/1
Moshi	Tanzania	rs763737	153278307	IRAK1	other severe malaria	add	All	0.0537838	0.113089	0.634368	1.06(0.85-1.32)	SEHA	99/106/249	42/35/107
Noguchi	Ghana	rs763737	153278307	IRAK1	other severe malaria	add	All	0.0677485	0.1119	0.544889	1.07(0.86-1.33)	SEHA	51/42/89	105/84/189
Ougadougou	BurkinaFaso	rs763737	153278307	IRAK1	other severe malaria	add	All	-0.0357161	0.063797	0.575589	0.96(0.85-1.09)	SHA	211/145/355	207/132/334
All	All	rs763737	153278307	IRAK1	other severe malaria	add	All	0.0258153	0.0206823	0.211964	1.03(0.99-1.07)	SEHA	6168/3401/6625	2120/1019/2308
Bamako	Mali	rs763737	153278307	IRAK1	other severe malaria	rec	All	0.269354	0.243996	0.269624	1.31(0.81-2.11)	SEHA	114/70/129	26/26/50
Banjul	Gambia	rs763737	153278307	IRAK1	other severe malaria	rec	All	0.0808731	0.0810804	0.31855	1.08(0.92-1.27)	SEHA	1375/786/979	473/237/351
Blantyre	Malawi	rs763737	153278307	IRAK1	other severe malaria	rec	All	0.163891	0.154305	0.288179	1.18(0.87-1.59)	SHA	598/523/1403	38/51/128
Buea	Cameroon	rs763737	153278307	IRAK1	other severe malaria	rec	All	0.311822	0.139996	0.025923	1.37(1.04-1.8)	SEHA	240/68/239	155/99/218
Ho_Chi_Minh_City	VietNam	rs763737	153278307	IRAK1	other severe malaria	rec	All	0.0543286	0.130784	0.677844	1.06(0.82-1.36)	SE	1784/356/325	403/44/95
Ibadan	Nigeria	rs763737	153278307	IRAK1	other severe malaria	rec	All	0.571033	0.455253	0.209726	1.77(0.73-4.32)	SEHA	7/14/17	1934-10-19
Kilifi	Kenya	rs763737	153278307	IRAK1	other severe malaria	rec	All	0.00656054	0.0799058	0.934565	1.01(0.86-1.18)	SEHA	920/861/1941	254/173/500
Kumasi	Ghana	rs763737	153278307	IRAK1	other severe malaria	rec	All	-0.0482891	0.101713	0.634958	0.95(0.78-1.16)	SEHA	537/422/897	190/123/301
Madang	PapuaNewGuinea	rs763737	153278307	IRAK1	other severe malaria	rec	All	-0.66312	1.23247	0.590548	0.52(0.05-5.77)	SE	232/8/2	208/5/1
Moshi	Tanzania	rs763737	153278307	IRAK1	other severe malaria	rec	All	0.121679	0.189856	0.521586	1.13(0.78-1.64)	SEHA	99/106/249	42/35/107
Noguchi	Ghana	rs763737	153278307	IRAK1	other severe malaria	rec	All	0.127444	0.192873	0.508761	1.14(0.78-1.66)	SEHA	51/42/89	105/84/189
Ougadougou	BurkinaFaso	rs763737	153278307	IRAK1	other severe malaria	rec	All	-0.101686	0.113425	0.369981	0.9(0.72-1.13)	SHA	211/145/355	207/132/334
All	All	rs763737	153278307	IRAK1	other severe malaria	rec	All	0.0497802	0.0377063	0.186765	1.05(0.98-1.13)	SEHA	6168/3401/6625	2120/1019/2308
Bamako	Mali	rs763737	153278307	IRAK1	other severe malaria	dom	All	0.679122	0.288511	0.0185782	1.97(1.12-3.47)	SEHA	114/70/129	26/26/50
Banjul	Gambia	rs763737	153278307	IRAK1	other severe malaria	dom	All	0.0119537	0.0762289	0.875392	1.01(0.87-1.18)	SEHA	1375/786/979	473/237/351
Blantyre	Malawi	rs763737	153278307	IRAK1	other severe malaria	dom	All	0.400639	0.190373	0.0353353	1.49(1.03-2.17)	SHA	598/523/1403	38/51/128
Buea	Cameroon	rs763737	153278307	IRAK1	other severe malaria	dom	All	0.348106	0.140216	0.0130412	1.42(1.08-1.86)	SEHA	240/68/239	155/99/218
Ho_Chi_Minh_City	VietNam	rs763737	153278307	IRAK1	other severe malaria	dom	All	0.0469638	0.1112	0.67278	1.05(0.84-1.3)	SE	1784/356/325	403/44/95
Ibadan	Nigeria	rs763737	153278307	IRAK1	other severe malaria	dom	All	-0.183957	0.530605	0.728821	0.83(0.29-2.35)	SEHA	7/14/17	1934-10-19
Kilifi	Kenya	rs763737	153278307	IRAK1	other severe malaria	dom	All	-0.167364	0.0904389	0.0642303	0.85(0.71-1.01)	SEHA	920/861/1941	254/173/500
Kumasi	Ghana	rs763737	153278307	IRAK1	other severe malaria	dom	All	-0.0639014	0.111747	0.56743	0.94(0.75-1.17)	SEHA	537/422/897	190/123/301
Madang	PapuaNewGuinea	rs763737	153278307	IRAK1	other severe malaria	dom	All	-0.322529	0.55577	0.561693	0.72(0.24-2.15)	SE	232/8/2	208/5/1
Moshi	Tanzania	rs763737	153278307	IRAK1	other severe malaria	dom	All	0.0434163	0.228634	0.849392	1.04(0.67-1.63)	SEHA	99/106/249	42/35/107
Noguchi	Ghana	rs763737	153278307	IRAK1	other severe malaria	dom	All	0.100465	0.224224	0.654111	1.11(0.71-1.72)	SEHA	51/42/89	105/84/189
Ougadougou	BurkinaFaso	rs763737	153278307	IRAK1	other severe malaria	dom	All	-0.0132044	0.125233	0.916028	0.99(0.77-1.26)	SHA	211/145/355	207/132/334
All	All	rs763737	153278307	IRAK1	other severe malaria	dom	All	0.0385719	0.0388164	0.320367	1.04(0.96-1.12)	SEHA	6168/3401/6625	2120/1019/2308
Bamako	Mali	rs763737	153278307	IRAK1	other severe malaria	add	F	-0.0665271	0.265798	0.802362	0.94(0.56-1.58)	EHA	28/70/53	7/26/10
Banjul	Gambia	rs763737	153278307	IRAK1	other severe malaria	add	F	-0.081497	0.0762074	0.284885	0.92(0.79-1.07)	EHA	498/786/301	176/237/89
Blantyre	Malawi	rs763737	153278307	IRAK1	other severe malaria	add	F	0.261822	0.161286	0.104516	1.3(0.95-1.78)	HA	162/523/516	6/51/48
Buea	Cameroon	rs763737	153278307	IRAK1	other severe malaria	add	F	0.0914377	0.156602	0.559297	1.1(0.81-1.49)	EHA	40/68/42	52/99/62
Ho_Chi_Minh_City	VietNam	rs763737	153278307	IRAK1	other severe malaria	add	F	-0.0999222	0.165715	0.546526	0.9(0.65-1.25)	E	736/356/44	92/44/3
Ibadan	Nigeria	rs763737	153278307	IRAK1	other severe malaria	add	F	0.872	0.602859	0.148054	2.39(0.73-7.8)	EHA	1/14/5	2011-10-03
Kilifi	Kenya	rs763737	153278307	IRAK1	other severe malaria	add	F	0.0399494	0.0803909	0.619231	1.04(0.89-1.22)	EHA	269/861/757	72/173/198
Kumasi	Ghana	rs763737	153278307	IRAK1	other severe malaria	add	F	-0.00432506	0.099204	0.965225	1(0.82-1.21)	EHA	171/422/351	53/123/113
Madang	PapuaNewGuinea	rs763737	153278307	IRAK1	other severe malaria	add	F	-0.228146	0.592908	0.700393	0.8(0.25-2.54)	E	105/8/0	80/5/0
Moshi	Tanzania	rs763737	153278307	IRAK1	other severe malaria	add	F	0.0467021	0.195101	0.810816	1.05(0.71-1.54)	EHA	25/106/118	11/35/49
Noguchi	Ghana	rs763737	153278307	IRAK1	other severe malaria	add	F	0.262515	0.21085	0.21312	1.3(0.86-1.97)	EHA	12/42/31	20/84/69
Ougadougou	BurkinaFaso	rs763737	153278307	IRAK1	other severe malaria	add	F	-0.11445	0.114448	0.317299	0.89(0.71-1.12)	HA	62/145/139	50/132/104
All	All	rs763737	153278307	IRAK1	other severe malaria	add	F	-0.00204838	0.0378191	0.956806	1(0.93-1.07)	EHA	2109/3401/2357	622/1019/756
Bamako	Mali	rs763737	153278307	IRAK1	other severe malaria	rec	F	-0.474403	0.4214	0.26026	0.62(0.27-1.42)	EHA	28/70/53	7/26/10
Banjul	Gambia	rs763737	153278307	IRAK1	other severe malaria	rec	F	-0.0422703	0.138361	0.75998	0.96(0.73-1.26)	EHA	498/786/301	176/237/89
Blantyre	Malawi	rs763737	153278307	IRAK1	other severe malaria	rec	F	0.139157	0.212687	0.51293	1.15(0.76-1.74)	HA	162/523/516	6/51/48
Buea	Cameroon	rs763737	153278307	IRAK1	other severe malaria	rec	F	0.0619368	0.250592	0.804783	1.06(0.65-1.74)	EHA	40/68/42	52/99/62
Ho_Chi_Minh_City	VietNam	rs763737	153278307	IRAK1	other severe malaria	rec	F	-0.616969	0.6064	0.30895	0.54(0.16-1.77)	E	736/356/44	92/44/3
Ibadan	Nigeria	rs763737	153278307	IRAK1	other severe malaria	rec	F	1.58141	0.824473	0.0550997	4.86(0.97-24.47)	EHA	1/14/5	2011-10-03
Kilifi	Kenya	rs763737	153278307	IRAK1	other severe malaria	rec	F	0.180745	0.112017	0.106625	1.2(0.96-1.49)	EHA	269/861/757	72/173/198
Kumasi	Ghana	rs763737	153278307	IRAK1	other severe malaria	rec	F	-0.00473787	0.146589	0.974216	1(0.75-1.33)	EHA	171/422/351	53/123/113
Madang	PapuaNewGuinea	rs763737	153278307	IRAK1	other severe malaria	rec	F	NA	NA	NA	NA(NA-NA)	E	105/8/0	80/5/0
Moshi	Tanzania	rs763737	153278307	IRAK1	other severe malaria	rec	F	0.126325	0.261093	0.628505	1.13(0.68-1.89)	EHA	25/106/118	11/35/49
Noguchi	Ghana	rs763737	153278307	IRAK1	other severe malaria	rec	F	0.31304	0.28976	0.279989	1.37(0.78-2.41)	EHA	12/42/31	20/84/69
Ougadougou	BurkinaFaso	rs763737	153278307	IRAK1	other severe malaria	rec	F	-0.221621	0.168137	0.187472	0.8(0.58-1.11)	HA	62/145/139	50/132/104
All	All	rs763737	153278307	IRAK1	other severe malaria	rec	F	0.0352571	0.0583229	0.545501	1.04(0.92-1.16)	EHA	2109/3401/2357	622/1019/756
Bamako	Mali	rs763737	153278307	IRAK1	other severe malaria	dom	F	0.425028	0.490884	0.386577	1.53(0.58-4)	EHA	28/70/53	7/26/10
Banjul	Gambia	rs763737	153278307	IRAK1	other severe malaria	dom	F	-0.148308	0.111249	0.182494	0.86(0.69-1.07)	EHA	498/786/301	176/237/89
Blantyre	Malawi	rs763737	153278307	IRAK1	other severe malaria	dom	F	0.962753	0.433227	0.0262641	2.62(1.12-6.12)	HA	162/523/516	6/51/48
Buea	Cameroon	rs763737	153278307	IRAK1	other severe malaria	dom	F	0.188832	0.261638	0.470462	1.21(0.72-2.02)	EHA	40/68/42	52/99/62
Ho_Chi_Minh_City	VietNam	rs763737	153278307	IRAK1	other severe malaria	dom	F	-0.0566234	0.190505	0.766293	0.94(0.65-1.37)	E	736/356/44	92/44/3
Ibadan	Nigeria	rs763737	153278307	IRAK1	other severe malaria	dom	F	-0.383379	1.28377	0.765218	0.68(0.06-8.44)	EHA	1/14/5	2011-10-03
Kilifi	Kenya	rs763737	153278307	IRAK1	other severe malaria	dom	F	-0.192466	0.151555	0.204106	0.82(0.61-1.11)	EHA	269/861/757	72/173/198
Kumasi	Ghana	rs763737	153278307	IRAK1	other severe malaria	dom	F	-0.00757382	0.18593	0.967507	0.99(0.69-1.43)	EHA	171/422/351	53/123/113
Madang	PapuaNewGuinea	rs763737	153278307	IRAK1	other severe malaria	dom	F	-0.228146	0.592908	0.700393	0.8(0.25-2.54)	E	105/8/0	80/5/0
Moshi	Tanzania	rs763737	153278307	IRAK1	other severe malaria	dom	F	-0.105484	0.409002	0.79648	0.9(0.4-2.01)	EHA	25/106/118	11/35/49
Noguchi	Ghana	rs763737	153278307	IRAK1	other severe malaria	dom	F	0.372178	0.411864	0.366185	1.45(0.65-3.25)	EHA	12/42/31	20/84/69
Ougadougou	BurkinaFaso	rs763737	153278307	IRAK1	other severe malaria	dom	F	-0.0406183	0.215949	0.850804	0.96(0.63-1.47)	HA	62/145/139	50/132/104
All	All	rs763737	153278307	IRAK1	other severe malaria	dom	F	-0.048284	0.0639187	0.450011	0.95(0.84-1.08)	EHA	2109/3401/2357	622/1019/756
Bamako	Mali	rs763737	153278307	IRAK1	other severe malaria	het	F	0.612696	0.365576	0.0937433	1.85(0.9-3.78)	EHA	28/70/53	7/26/10
Banjul	Gambia	rs763737	153278307	IRAK1	other severe malaria	het	F	-0.106428	0.10514	0.311418	0.9(0.73-1.1)	EHA	498/786/301	176/237/89
Blantyre	Malawi	rs763737	153278307	IRAK1	other severe malaria	het	F	0.186349	0.207081	0.36818	1.2(0.8-1.81)	HA	162/523/516	6/51/48
Buea	Cameroon	rs763737	153278307	IRAK1	other severe malaria	het	F	0.0877011	0.223555	0.694835	1.09(0.7-1.69)	EHA	40/68/42	52/99/62
Ho_Chi_Minh_City	VietNam	rs763737	153278307	IRAK1	other severe malaria	het	F	0.0222042	0.194125	0.908936	1.02(0.7-1.5)	E	736/356/44	92/44/3
Ibadan	Nigeria	rs763737	153278307	IRAK1	other severe malaria	het	F	-1.43175	0.730088	0.049871	0.24(0.06-1)	EHA	1/14/5	2011-10-03
Kilifi	Kenya	rs763737	153278307	IRAK1	other severe malaria	het	F	-0.272788	0.111118	0.0140909	0.76(0.61-0.95)	EHA	269/861/757	72/173/198
Kumasi	Ghana	rs763737	153278307	IRAK1	other severe malaria	het	F	3.49059e-05	0.142453	0.999804	1(0.76-1.32)	EHA	171/422/351	53/123/113
Madang	PapuaNewGuinea	rs763737	153278307	IRAK1	other severe malaria	het	F	-0.228146	0.592908	0.700393	0.8(0.25-2.54)	E	105/8/0	80/5/0
Moshi	Tanzania	rs763737	153278307	IRAK1	other severe malaria	het	F	-0.171102	0.263728	0.516481	0.84(0.5-1.41)	EHA	25/106/118	11/35/49
Noguchi	Ghana	rs763737	153278307	IRAK1	other severe malaria	het	F	-0.127432	0.276229	0.644562	0.88(0.51-1.51)	EHA	12/42/31	20/84/69
Ougadougou	BurkinaFaso	rs763737	153278307	IRAK1	other severe malaria	het	F	0.185888	0.16289	0.253794	1.2(0.88-1.66)	HA	62/145/139	50/132/104
All	All	rs763737	153278307	IRAK1	other severe malaria	het	F	-0.0594817	0.0519034	0.251792	0.94(0.85-1.04)	EHA	2109/3401/2357	622/1019/756
Bamako	Mali	rs763737	153278307	IRAK1	other severe malaria	dom	M	0.816701	0.339745	0.0162229	2.26(1.16-4.4)	EHA	86/0/76	19/0/40
Banjul	Gambia	rs763737	153278307	IRAK1	other severe malaria	dom	M	0.14685	0.10202	0.150028	1.16(0.95-1.41)	EHA	877/0/678	297/0/262
Blantyre	Malawi	rs763737	153278307	IRAK1	other severe malaria	dom	M	0.20043	0.226156	0.375485	1.22(0.78-1.9)	HA	436/0/887	32/0/80
Buea	Cameroon	rs763737	153278307	IRAK1	other severe malaria	dom	M	0.435194	0.168324	0.0097253	1.55(1.11-2.15)	EHA	200/0/197	103/0/156
Ho_Chi_Minh_City	VietNam	rs763737	153278307	IRAK1	other severe malaria	dom	M	0.106712	0.136829	0.435452	1.11(0.85-1.45)	E	1048/0/281	311/0/92
Ibadan	Nigeria	rs763737	153278307	IRAK1	other severe malaria	dom	M	-0.0430345	0.656463	0.947732	0.96(0.26-3.47)	EHA	6/0/12	16/0/23
Kilifi	Kenya	rs763737	153278307	IRAK1	other severe malaria	dom	M	-0.147357	0.111288	0.185468	0.86(0.69-1.07)	EHA	651/0/1184	182/0/302
Kumasi	Ghana	rs763737	153278307	IRAK1	other severe malaria	dom	M	-0.107688	0.139856	0.441305	0.9(0.68-1.18)	EHA	366/0/546	137/0/188
Madang	PapuaNewGuinea	rs763737	153278307	IRAK1	other severe malaria	dom	M	-0.651036	1.23331	0.597586	0.52(0.05-5.85)	E	127/0/2	128/0/1
Moshi	Tanzania	rs763737	153278307	IRAK1	other severe malaria	dom	M	0.153382	0.28411	0.589287	1.17(0.67-2.03)	EHA	74/0/131	31/0/58
Noguchi	Ghana	rs763737	153278307	IRAK1	other severe malaria	dom	M	-0.034537	0.26392	0.895885	0.97(0.58-1.62)	EHA	39/0/58	85/0/120
Ougadougou	BurkinaFaso	rs763737	153278307	IRAK1	other severe malaria	dom	M	0.00277495	0.154384	0.985659	1(0.74-1.36)	HA	149/0/216	157/0/230
All	All	rs763737	153278307	IRAK1	other severe malaria	dom	M	0.0743244	0.0490129	0.129412	1.08(0.98-1.19)	EHA	4059/0/4268	1498/0/1552
Bamako	Mali	rs1734792	153341060	MECP2	severe malaria	add	All	0.12615	0.112497	0.262133	1.13(0.91-1.41)	SEHA	230/49/48	286/74/75
Banjul	Gambia	rs1734792	153341060	MECP2	severe malaria	add	All	-0.0285731	0.043906	0.51519	0.97(0.89-1.06)	SEHA	2419/476/326	1903/328/236
Blantyre	Malawi	rs1734792	153341060	MECP2	severe malaria	add	All	0.0817914	0.0534942	0.12627	1.09(0.98-1.21)	SHA	1575/495/437	846/260/268
Buea	Cameroon	rs1734792	153341060	MECP2	severe malaria	add	All	0.0428938	0.0890319	0.629962	1.04(0.88-1.24)	SEHA	426/55/93	430/88/93
Ho_Chi_Minh_City	VietNam	rs1734792	153341060	MECP2	severe malaria	add	All	0.0292534	0.0532772	0.582951	1.03(0.93-1.14)	SE	382/445/1645	145/81/562
Ibadan	Nigeria	rs1734792	153341060	MECP2	severe malaria	add	All	0.214873	0.28536	0.451456	1.24(0.71-2.17)	SEHA	2005-12-22	53/11/13
Kilifi	Kenya	rs1734792	153341060	MECP2	severe malaria	add	All	0.0230081	0.0388229	0.55342	1.02(0.95-1.1)	SEHA	2304/842/726	1326/459/438
Kumasi	Ghana	rs1734792	153341060	MECP2	severe malaria	add	All	-0.0576029	0.0550251	0.29517	0.94(0.85-1.05)	SEHA	1294/380/314	986/247/240
Madang	PapuaNewGuinea	rs1734792	153341060	MECP2	severe malaria	add	All	-0.0677352	0.130514	0.603768	0.93(0.72-1.21)	SE	187/27/25	304/37/35
Moshi	Tanzania	rs1734792	153341060	MECP2	severe malaria	add	All	0.033018	0.108013	0.759845	1.03(0.84-1.28)	SEHA	257/112/85	272/68/86
Noguchi	Ghana	rs1734792	153341060	MECP2	severe malaria	add	All	0.00419499	0.120122	0.972141	1(0.79-1.27)	SEHA	118/39/29	409/112/123
Ougadougou	BurkinaFaso	rs1734792	153341060	MECP2	severe malaria	add	All	-0.0466306	0.0788933	0.554481	0.95(0.82-1.11)	SHA	479/133/99	577/127/132
All	All	rs1734792	153341060	MECP2	severe malaria	add	All	0.0110665	0.0188981	0.558154	1.01(0.97-1.05)	SEHA	9693/3065/3832	7537/1892/2301
Bamako	Mali	rs1734792	153341060	MECP2	severe malaria	rec	All	0.101661	0.233165	0.662832	1.11(0.7-1.75)	SEHA	230/49/48	286/74/75
Banjul	Gambia	rs1734792	153341060	MECP2	severe malaria	rec	All	-0.029466	0.0974935	0.762472	0.97(0.8-1.18)	SEHA	2419/476/326	1903/328/236
Blantyre	Malawi	rs1734792	153341060	MECP2	severe malaria	rec	All	0.243666	0.106754	0.0224597	1.28(1.04-1.57)	SHA	1575/495/437	846/260/268
Buea	Cameroon	rs1734792	153341060	MECP2	severe malaria	rec	All	0.202749	0.185629	0.274733	1.22(0.85-1.76)	SEHA	426/55/93	430/88/93
Ho_Chi_Minh_City	VietNam	rs1734792	153341060	MECP2	severe malaria	rec	All	0.0431938	0.092887	0.641921	1.04(0.87-1.25)	SE	382/445/1645	145/81/562
Ibadan	Nigeria	rs1734792	153341060	MECP2	severe malaria	rec	All	0.627053	0.602714	0.298162	1.87(0.57-6.1)	SEHA	2005-12-22	53/11/13
Kilifi	Kenya	rs1734792	153341060	MECP2	severe malaria	rec	All	0.0683279	0.0793955	0.389457	1.07(0.92-1.25)	SEHA	2304/842/726	1326/459/438
Kumasi	Ghana	rs1734792	153341060	MECP2	severe malaria	rec	All	-0.0401932	0.112511	0.720914	0.96(0.77-1.2)	SEHA	1294/380/314	986/247/240
Madang	PapuaNewGuinea	rs1734792	153341060	MECP2	severe malaria	rec	All	-0.126559	0.282027	0.653613	0.88(0.51-1.53)	SE	187/27/25	304/37/35
Moshi	Tanzania	rs1734792	153341060	MECP2	severe malaria	rec	All	0.298715	0.221479	0.177423	1.35(0.87-2.08)	SEHA	257/112/85	272/68/86
Noguchi	Ghana	rs1734792	153341060	MECP2	severe malaria	rec	All	0.159338	0.255332	0.532601	1.17(0.71-1.93)	SEHA	118/39/29	409/112/123
Ougadougou	BurkinaFaso	rs1734792	153341060	MECP2	severe malaria	rec	All	0.0288207	0.166996	0.862979	1.03(0.74-1.43)	SHA	479/133/99	577/127/132
All	All	rs1734792	153341060	MECP2	severe malaria	rec	All	0.0748989	0.0378544	0.0478609	1.08(1-1.16)	SEHA	9693/3065/3832	7537/1892/2301
Bamako	Mali	rs1734792	153341060	MECP2	severe malaria	dom	All	0.267328	0.179942	0.137376	1.31(0.92-1.86)	SEHA	230/49/48	286/74/75
Banjul	Gambia	rs1734792	153341060	MECP2	severe malaria	dom	All	-0.0536835	0.0677477	0.428126	0.95(0.83-1.08)	SEHA	2419/476/326	1903/328/236
Blantyre	Malawi	rs1734792	153341060	MECP2	severe malaria	dom	All	0.0550279	0.0856384	0.520509	1.06(0.89-1.25)	SHA	1575/495/437	846/260/268
Buea	Cameroon	rs1734792	153341060	MECP2	severe malaria	dom	All	-0.0109041	0.151772	0.942725	0.99(0.73-1.33)	SEHA	426/55/93	430/88/93
Ho_Chi_Minh_City	VietNam	rs1734792	153341060	MECP2	severe malaria	dom	All	0.0655496	0.1112	0.555544	1.07(0.86-1.33)	SE	382/445/1645	145/81/562
Ibadan	Nigeria	rs1734792	153341060	MECP2	severe malaria	dom	All	0.137851	0.480202	0.77406	1.15(0.45-2.94)	SEHA	2005-12-22	53/11/13
Kilifi	Kenya	rs1734792	153341060	MECP2	severe malaria	dom	All	0.0177691	0.0630318	0.778015	1.02(0.9-1.15)	SEHA	2304/842/726	1326/459/438
Kumasi	Ghana	rs1734792	153341060	MECP2	severe malaria	dom	All	-0.124688	0.0885474	0.159087	0.88(0.74-1.05)	SEHA	1294/380/314	986/247/240
Madang	PapuaNewGuinea	rs1734792	153341060	MECP2	severe malaria	dom	All	-0.104925	0.209979	0.61729	0.9(0.6-1.36)	SE	187/27/25	304/37/35
Moshi	Tanzania	rs1734792	153341060	MECP2	severe malaria	dom	All	-0.108067	0.17154	0.528707	0.9(0.64-1.26)	SEHA	257/112/85	272/68/86
Noguchi	Ghana	rs1734792	153341060	MECP2	severe malaria	dom	All	-0.0870421	0.196372	0.657584	0.92(0.62-1.35)	SEHA	118/39/29	409/112/123
Ougadougou	BurkinaFaso	rs1734792	153341060	MECP2	severe malaria	dom	All	-0.135377	0.125925	0.282347	0.87(0.68-1.12)	SHA	479/133/99	577/127/132
All	All	rs1734792	153341060	MECP2	severe malaria	dom	All	-0.0199532	0.0310832	0.520919	0.98(0.92-1.04)	SEHA	9693/3065/3832	7537/1892/2301
Bamako	Mali	rs1734792	153341060	MECP2	severe malaria	add	F	0.316489	0.217259	0.145191	1.37(0.9-2.1)	EHA	104/49/7	108/74/9
Banjul	Gambia	rs1734792	153341060	MECP2	severe malaria	add	F	-0.0154237	0.0770383	0.841318	0.98(0.85-1.15)	EHA	1090/476/42	819/328/34
Blantyre	Malawi	rs1734792	153341060	MECP2	severe malaria	add	F	0.0919258	0.0936773	0.326443	1.1(0.91-1.32)	HA	620/495/77	354/260/58
Buea	Cameroon	rs1734792	153341060	MECP2	severe malaria	add	F	-0.153887	0.193118	0.425534	0.86(0.59-1.25)	EHA	97/55/7	179/88/13
Ho_Chi_Minh_City	VietNam	rs1734792	153341060	MECP2	severe malaria	add	F	0.119539	0.133337	0.369974	1.13(0.87-1.46)	E	54/445/651	6/81/121
Ibadan	Nigeria	rs1734792	153341060	MECP2	severe malaria	add	F	-0.21001	0.49188	0.669413	0.81(0.31-2.13)	EHA	2002-12-08	2003-11-17
Kilifi	Kenya	rs1734792	153341060	MECP2	severe malaria	add	F	0.0274201	0.0690703	0.691376	1.03(0.9-1.18)	EHA	928/842/155	532/459/87
Kumasi	Ghana	rs1734792	153341060	MECP2	severe malaria	add	F	-0.218466	0.0971515	0.024531	0.8(0.66-0.97)	EHA	526/380/75	395/247/41
Madang	PapuaNewGuinea	rs1734792	153341060	MECP2	severe malaria	add	F	0.0448847	0.219289	0.83782	1.05(0.68-1.61)	E	80/27/5	122/37/9
Moshi	Tanzania	rs1734792	153341060	MECP2	severe malaria	add	F	-0.0948483	0.181741	0.601749	0.91(0.64-1.3)	EHA	114/112/23	110/68/22
Noguchi	Ghana	rs1734792	153341060	MECP2	severe malaria	add	F	-0.0981355	0.238258	0.680422	0.91(0.57-1.45)	EHA	40/39/5	153/112/20
Ougadougou	BurkinaFaso	rs1734792	153341060	MECP2	severe malaria	add	F	-0.365492	0.158747	0.0213153	0.69(0.51-0.95)	HA	196/133/15	221/127/13
All	All	rs1734792	153341060	MECP2	severe malaria	add	F	-0.0230861	0.0348062	0.507155	0.98(0.91-1.05)	EHA	3857/3065/1064	3016/1892/430
Bamako	Mali	rs1734792	153341060	MECP2	severe malaria	rec	F	0.0352412	0.542973	0.94825	1.04(0.36-3)	EHA	104/49/7	108/74/9
Banjul	Gambia	rs1734792	153341060	MECP2	severe malaria	rec	F	0.179244	0.245309	0.46497	1.2(0.74-1.93)	EHA	1090/476/42	819/328/34
Blantyre	Malawi	rs1734792	153341060	MECP2	severe malaria	rec	F	0.444174	0.197866	0.0247795	1.56(1.06-2.3)	HA	620/495/77	354/260/58
Buea	Cameroon	rs1734792	153341060	MECP2	severe malaria	rec	F	0.1125	0.514498	0.826915	1.12(0.41-3.07)	EHA	97/55/7	179/88/13
Ho_Chi_Minh_City	VietNam	rs1734792	153341060	MECP2	severe malaria	rec	F	0.0891465	0.15388	0.56237	1.09(0.81-1.48)	E	54/445/651	6/81/121
Ibadan	Nigeria	rs1734792	153341060	MECP2	severe malaria	rec	F	0.0607113	0.993009	0.951249	1.06(0.15-7.44)	EHA	2002-12-08	2003-11-17
Kilifi	Kenya	rs1734792	153341060	MECP2	severe malaria	rec	F	0.0892521	0.152191	0.557574	1.09(0.81-1.47)	EHA	928/842/155	532/459/87
Kumasi	Ghana	rs1734792	153341060	MECP2	severe malaria	rec	F	-0.262554	0.221624	0.236145	0.77(0.5-1.19)	EHA	526/380/75	395/247/41
Madang	PapuaNewGuinea	rs1734792	153341060	MECP2	severe malaria	rec	F	0.281824	0.574549	0.623771	1.33(0.43-4.09)	E	80/27/5	122/37/9
Moshi	Tanzania	rs1734792	153341060	MECP2	severe malaria	rec	F	0.426093	0.364844	0.242856	1.53(0.75-3.13)	EHA	114/112/23	110/68/22
Noguchi	Ghana	rs1734792	153341060	MECP2	severe malaria	rec	F	0.393513	0.578247	0.496171	1.48(0.48-4.6)	EHA	40/39/5	153/112/20
Ougadougou	BurkinaFaso	rs1734792	153341060	MECP2	severe malaria	rec	F	-0.293774	0.422452	0.486803	0.75(0.33-1.71)	HA	196/133/15	221/127/13
All	All	rs1734792	153341060	MECP2	severe malaria	rec	F	0.117096	0.0750223	0.118568	1.12(0.97-1.3)	EHA	3857/3065/1064	3016/1892/430
Bamako	Mali	rs1734792	153341060	MECP2	severe malaria	dom	F	0.430266	0.255118	0.0916931	1.54(0.93-2.54)	EHA	104/49/7	108/74/9
Banjul	Gambia	rs1734792	153341060	MECP2	severe malaria	dom	F	-0.0423623	0.0873133	0.627551	0.96(0.81-1.14)	EHA	1090/476/42	819/328/34
Blantyre	Malawi	rs1734792	153341060	MECP2	severe malaria	dom	F	-0.00896786	0.114133	0.937372	0.99(0.79-1.24)	HA	620/495/77	354/260/58
Buea	Cameroon	rs1734792	153341060	MECP2	severe malaria	dom	F	-0.242448	0.230791	0.293485	0.78(0.5-1.23)	EHA	97/55/7	179/88/13
Ho_Chi_Minh_City	VietNam	rs1734792	153341060	MECP2	severe malaria	dom	F	0.494291	0.438439	0.259579	1.64(0.69-3.87)	E	54/445/651	6/81/121
Ibadan	Nigeria	rs1734792	153341060	MECP2	severe malaria	dom	F	-0.450357	0.697148	0.51828	0.64(0.16-2.5)	EHA	2002-12-08	2003-11-17
Kilifi	Kenya	rs1734792	153341060	MECP2	severe malaria	dom	F	0.0140235	0.0855299	0.869762	1.01(0.86-1.2)	EHA	928/842/155	532/459/87
Kumasi	Ghana	rs1734792	153341060	MECP2	severe malaria	dom	F	-0.254876	0.119261	0.0325869	0.78(0.61-0.98)	EHA	526/380/75	395/247/41
Madang	PapuaNewGuinea	rs1734792	153341060	MECP2	severe malaria	dom	F	0.00432073	0.276797	0.987546	1(0.58-1.73)	E	80/27/5	122/37/9
Moshi	Tanzania	rs1734792	153341060	MECP2	severe malaria	dom	F	-0.323785	0.230796	0.160645	0.72(0.46-1.14)	EHA	114/112/23	110/68/22
Noguchi	Ghana	rs1734792	153341060	MECP2	severe malaria	dom	F	-0.246589	0.287153	0.390485	0.78(0.45-1.37)	EHA	40/39/5	153/112/20
Ougadougou	BurkinaFaso	rs1734792	153341060	MECP2	severe malaria	dom	F	-0.413531	0.178697	0.0206595	0.66(0.47-0.94)	HA	196/133/15	221/127/13
All	All	rs1734792	153341060	MECP2	severe malaria	dom	F	-0.0738848	0.0430842	0.0863649	0.93(0.85-1.01)	EHA	3857/3065/1064	3016/1892/430
Bamako	Mali	rs1734792	153341060	MECP2	severe malaria	het	F	0.405397	0.249625	0.10437	1.5(0.92-2.45)	EHA	104/49/7	108/74/9
Banjul	Gambia	rs1734792	153341060	MECP2	severe malaria	het	F	-0.0672716	0.088918	0.449315	0.93(0.79-1.11)	EHA	1090/476/42	819/328/34
Blantyre	Malawi	rs1734792	153341060	MECP2	severe malaria	het	F	-0.132932	0.106241	0.210847	0.88(0.71-1.08)	HA	620/495/77	354/260/58
Buea	Cameroon	rs1734792	153341060	MECP2	severe malaria	het	F	-0.266967	0.231355	0.24853	0.77(0.49-1.21)	EHA	97/55/7	179/88/13
Ho_Chi_Minh_City	VietNam	rs1734792	153341060	MECP2	severe malaria	het	F	-0.0171008	0.155636	0.912507	0.98(0.72-1.33)	E	54/445/651	6/81/121
Ibadan	Nigeria	rs1734792	153341060	MECP2	severe malaria	het	F	-0.471317	0.6882	0.493435	0.62(0.16-2.4)	EHA	2002-12-08	2003-11-17
Kilifi	Kenya	rs1734792	153341060	MECP2	severe malaria	het	F	-0.0127933	0.0818688	0.875823	0.99(0.84-1.16)	EHA	928/842/155	532/459/87
Kumasi	Ghana	rs1734792	153341060	MECP2	severe malaria	het	F	-0.165976	0.115219	0.149721	0.85(0.68-1.06)	EHA	526/380/75	395/247/41
Madang	PapuaNewGuinea	rs1734792	153341060	MECP2	severe malaria	het	F	-0.0709018	0.292928	0.808745	0.93(0.52-1.65)	E	80/27/5	122/37/9
Moshi	Tanzania	rs1734792	153341060	MECP2	severe malaria	het	F	-0.416108	0.212117	0.0497984	0.66(0.44-1)	EHA	114/112/23	110/68/22
Noguchi	Ghana	rs1734792	153341060	MECP2	severe malaria	het	F	-0.309744	0.269201	0.249895	0.73(0.43-1.24)	EHA	40/39/5	153/112/20
Ougadougou	BurkinaFaso	rs1734792	153341060	MECP2	severe malaria	het	F	-0.336751	0.172013	0.0502641	0.71(0.51-1)	HA	196/133/15	221/127/13
All	All	rs1734792	153341060	MECP2	severe malaria	het	F	-0.100176	0.0407064	0.0138576	0.9(0.84-0.98)	EHA	3857/3065/1064	3016/1892/430
Bamako	Mali	rs1734792	153341060	MECP2	severe malaria	dom	M	0.162151	0.260206	0.533176	1.18(0.71-1.96)	EHA	126/0/41	178/0/66
Banjul	Gambia	rs1734792	153341060	MECP2	severe malaria	dom	M	-0.0692111	0.107221	0.518604	0.93(0.76-1.15)	EHA	1329/0/284	1084/0/202
Blantyre	Malawi	rs1734792	153341060	MECP2	severe malaria	dom	M	0.152852	0.128553	0.234432	1.17(0.91-1.5)	HA	955/0/360	492/0/210
Buea	Cameroon	rs1734792	153341060	MECP2	severe malaria	dom	M	0.213749	0.205685	0.298709	1.24(0.83-1.85)	EHA	329/0/86	251/0/80
Ho_Chi_Minh_City	VietNam	rs1734792	153341060	MECP2	severe malaria	dom	M	0.0231889	0.116843	0.842684	1.02(0.81-1.29)	E	328/0/994	139/0/441
Ibadan	Nigeria	rs1734792	153341060	MECP2	severe malaria	dom	M	1.37725	0.973483	0.157137	3.96(0.59-26.72)	EHA	14/0/3	36/0/10
Kilifi	Kenya	rs1734792	153341060	MECP2	severe malaria	dom	M	0.0407978	0.0934735	0.662501	1.04(0.87-1.25)	EHA	1376/0/571	794/0/351
Kumasi	Ghana	rs1734792	153341060	MECP2	severe malaria	dom	M	0.0431618	0.133693	0.746814	1.04(0.8-1.36)	EHA	768/0/239	591/0/199
Madang	PapuaNewGuinea	rs1734792	153341060	MECP2	severe malaria	dom	M	-0.280458	0.332291	0.398662	0.76(0.39-1.45)	E	107/0/20	182/0/26
Moshi	Tanzania	rs1734792	153341060	MECP2	severe malaria	dom	M	0.228424	0.270996	0.39928	1.26(0.74-2.14)	EHA	143/0/62	162/0/64
Noguchi	Ghana	rs1734792	153341060	MECP2	severe malaria	dom	M	0.101615	0.286903	0.723206	1.11(0.63-1.94)	EHA	78/0/24	256/0/103
Ougadougou	BurkinaFaso	rs1734792	153341060	MECP2	severe malaria	dom	M	0.118586	0.183098	0.517201	1.13(0.79-1.61)	HA	283/0/84	356/0/119
All	All	rs1734792	153341060	MECP2	severe malaria	dom	M	0.0538893	0.0447659	0.228666	1.06(0.97-1.15)	EHA	5836/0/2768	4521/0/1871
Bamako	Mali	rs1734792	153341060	MECP2	cerebal malaria	add	All	0.228106	0.171456	0.183384	1.26(0.9-1.76)	SEHA	230/49/48	53/13/12
Banjul	Gambia	rs1734792	153341060	MECP2	cerebal malaria	add	All	-0.0463931	0.0660318	0.482313	0.95(0.84-1.09)	SEHA	2419/476/326	624/103/74
Blantyre	Malawi	rs1734792	153341060	MECP2	cerebal malaria	add	All	0.0514277	0.0638972	0.420906	1.05(0.93-1.19)	SHA	1575/495/437	552/167/150
Buea	Cameroon	rs1734792	153341060	MECP2	cerebal malaria	add	All	0.243429	0.239429	0.309294	1.28(0.8-2.04)	SEHA	426/55/93	2007-05-27
Ho_Chi_Minh_City	VietNam	rs1734792	153341060	MECP2	cerebal malaria	add	All	0.0460939	0.092315	0.61756	1.05(0.87-1.25)	SE	382/445/1645	38/18/152
Ibadan	Nigeria	rs1734792	153341060	MECP2	cerebal malaria	add	All	1.72467	1.46833	0.240163	5.61(0.32-99.74)	SEHA	2005-12-22	5/0/1
Kilifi	Kenya	rs1734792	153341060	MECP2	cerebal malaria	add	All	0.0407374	0.0534459	0.44593	1.04(0.94-1.16)	SEHA	2304/842/726	534/188/170
Kumasi	Ghana	rs1734792	153341060	MECP2	cerebal malaria	add	All	-0.185369	0.119795	0.121771	0.83(0.66-1.05)	SEHA	1294/380/314	166/34/27
Madang	PapuaNewGuinea	rs1734792	153341060	MECP2	cerebal malaria	add	All	-0.235717	0.305885	0.440941	0.79(0.43-1.44)	SE	187/27/25	37/4/2
Moshi	Tanzania	rs1734792	153341060	MECP2	cerebal malaria	add	All	0.245949	0.261657	0.347234	1.28(0.77-2.14)	SEHA	257/112/85	2010-03-21
Noguchi	Ghana	rs1734792	153341060	MECP2	cerebal malaria	add	All	0.110283	0.346685	0.750403	1.12(0.57-2.2)	SEHA	118/39/29	2003-05-13
Ougadougou	BurkinaFaso	rs1734792	153341060	MECP2	cerebal malaria	add	All	0.0274647	0.157044	0.86117	1.03(0.76-1.4)	SHA	479/133/99	69/22/14
All	All	rs1734792	153341060	MECP2	cerebal malaria	add	All	0.0188003	0.0294338	0.522998	1.02(0.96-1.08)	SEHA	9693/3065/3832	2139/562/622
Bamako	Mali	rs1734792	153341060	MECP2	cerebal malaria	rec	All	0.291981	0.373317	0.434139	1.34(0.64-2.78)	SEHA	230/49/48	53/13/12
Banjul	Gambia	rs1734792	153341060	MECP2	cerebal malaria	rec	All	-0.0222473	0.144234	0.877417	0.98(0.74-1.3)	SEHA	2419/476/326	624/103/74
Blantyre	Malawi	rs1734792	153341060	MECP2	cerebal malaria	rec	All	0.165185	0.127817	0.196233	1.18(0.92-1.52)	SHA	1575/495/437	552/167/150
Buea	Cameroon	rs1734792	153341060	MECP2	cerebal malaria	rec	All	0.727888	0.463693	0.116471	2.07(0.83-5.14)	SEHA	426/55/93	2007-05-27
Ho_Chi_Minh_City	VietNam	rs1734792	153341060	MECP2	cerebal malaria	rec	All	0.0689912	0.165488	0.676755	1.07(0.77-1.48)	SE	382/445/1645	38/18/152
Ibadan	Nigeria	rs1734792	153341060	MECP2	cerebal malaria	rec	All	19.4199	2.64957	2.31071e-13	271619593.43(1508848.2-48896372414.14)	SEHA	2005-12-22	5/0/1
Kilifi	Kenya	rs1734792	153341060	MECP2	cerebal malaria	rec	All	0.0806261	0.110398	0.465192	1.08(0.87-1.35)	SEHA	2304/842/726	534/188/170
Kumasi	Ghana	rs1734792	153341060	MECP2	cerebal malaria	rec	All	-0.19452	0.238271	0.414282	0.82(0.52-1.31)	SEHA	1294/380/314	166/34/27
Madang	PapuaNewGuinea	rs1734792	153341060	MECP2	cerebal malaria	rec	All	-0.685457	0.78754	0.384094	0.5(0.11-2.36)	SE	187/27/25	37/4/2
Moshi	Tanzania	rs1734792	153341060	MECP2	cerebal malaria	rec	All	0.994709	0.451669	0.0276445	2.7(1.12-6.55)	SEHA	257/112/85	2010-03-21
Noguchi	Ghana	rs1734792	153341060	MECP2	cerebal malaria	rec	All	0.228815	0.745525	0.758906	1.26(0.29-5.42)	SEHA	118/39/29	2003-05-13
Ougadougou	BurkinaFaso	rs1734792	153341060	MECP2	cerebal malaria	rec	All	-0.0853346	0.349751	0.807241	0.92(0.46-1.82)	SHA	479/133/99	69/22/14
All	All	rs1734792	153341060	MECP2	cerebal malaria	rec	All	0.0805157	0.0588685	0.1714	1.08(0.97-1.22)	SEHA	9693/3065/3832	2139/562/622
Bamako	Mali	rs1734792	153341060	MECP2	cerebal malaria	dom	All	0.44058	0.287407	0.125289	1.55(0.88-2.73)	SEHA	230/49/48	53/13/12
Banjul	Gambia	rs1734792	153341060	MECP2	cerebal malaria	dom	All	-0.0977424	0.100836	0.332385	0.91(0.74-1.11)	SEHA	2419/476/326	624/103/74
Blantyre	Malawi	rs1734792	153341060	MECP2	cerebal malaria	dom	All	0.0276055	0.101058	0.784728	1.03(0.84-1.25)	SHA	1575/495/437	552/167/150
Buea	Cameroon	rs1734792	153341060	MECP2	cerebal malaria	dom	All	0.189699	0.403337	0.638124	1.21(0.55-2.67)	SEHA	426/55/93	2007-05-27
Ho_Chi_Minh_City	VietNam	rs1734792	153341060	MECP2	cerebal malaria	dom	All	0.105608	0.191392	0.581095	1.11(0.76-1.62)	SE	382/445/1645	38/18/152
Ibadan	Nigeria	rs1734792	153341060	MECP2	cerebal malaria	dom	All	0.361456	1.44493	0.802467	1.44(0.08-24.37)	SEHA	2005-12-22	5/0/1
Kilifi	Kenya	rs1734792	153341060	MECP2	cerebal malaria	dom	All	0.0564994	0.0861887	0.512125	1.06(0.89-1.25)	SEHA	2304/842/726	534/188/170
Kumasi	Ghana	rs1734792	153341060	MECP2	cerebal malaria	dom	All	-0.348667	0.187135	0.0624358	0.71(0.49-1.02)	SEHA	1294/380/314	166/34/27
Madang	PapuaNewGuinea	rs1734792	153341060	MECP2	cerebal malaria	dom	All	-0.248817	0.468035	0.594988	0.78(0.31-1.95)	SE	187/27/25	37/4/2
Moshi	Tanzania	rs1734792	153341060	MECP2	cerebal malaria	dom	All	-0.0816219	0.443617	0.85402	0.92(0.39-2.2)	SEHA	257/112/85	2010-03-21
Noguchi	Ghana	rs1734792	153341060	MECP2	cerebal malaria	dom	All	0.145076	0.537797	0.787346	1.16(0.4-3.32)	SEHA	118/39/29	2003-05-13
Ougadougou	BurkinaFaso	rs1734792	153341060	MECP2	cerebal malaria	dom	All	0.116449	0.247836	0.638451	1.12(0.69-1.83)	SHA	479/133/99	69/22/14
All	All	rs1734792	153341060	MECP2	cerebal malaria	dom	All	-0.00213453	0.0480235	0.964548	1(0.91-1.1)	SEHA	9693/3065/3832	2139/562/622
Bamako	Mali	rs1734792	153341060	MECP2	cerebal malaria	add	F	0.653753	0.372099	0.0789292	1.92(0.93-3.99)	EHA	104/49/7	17/13/2
Banjul	Gambia	rs1734792	153341060	MECP2	cerebal malaria	add	F	-0.146533	0.11566	0.205183	0.86(0.69-1.08)	EHA	1090/476/42	288/103/7
Blantyre	Malawi	rs1734792	153341060	MECP2	cerebal malaria	add	F	0.0457754	0.110768	0.679421	1.05(0.84-1.3)	HA	620/495/77	234/167/32
Buea	Cameroon	rs1734792	153341060	MECP2	cerebal malaria	add	F	0.0706993	0.483472	0.883738	1.07(0.42-2.77)	EHA	97/55/7	2001-05-13
Ho_Chi_Minh_City	VietNam	rs1734792	153341060	MECP2	cerebal malaria	add	F	0.124807	0.265122	0.637818	1.13(0.67-1.9)	E	54/445/651	1/18/27
Ibadan	Nigeria	rs1734792	153341060	MECP2	cerebal malaria	add	F	1.60018	1.54299	0.299709	4.95(0.24-101.94)	EHA	2002-12-08	1/0/1
Kilifi	Kenya	rs1734792	153341060	MECP2	cerebal malaria	add	F	0.0562414	0.0948475	0.553204	1.06(0.88-1.27)	EHA	928/842/155	210/188/39
Kumasi	Ghana	rs1734792	153341060	MECP2	cerebal malaria	add	F	-0.245718	0.204575	0.229706	0.78(0.52-1.17)	EHA	526/380/75	72/34/6
Madang	PapuaNewGuinea	rs1734792	153341060	MECP2	cerebal malaria	add	F	0.313427	0.480414	0.514137	1.37(0.53-3.51)	E	80/27/5	2001-04-13
Moshi	Tanzania	rs1734792	153341060	MECP2	cerebal malaria	add	F	0.0570085	0.469337	0.903322	1.06(0.42-2.66)	EHA	114/112/23	2004-03-10
Noguchi	Ghana	rs1734792	153341060	MECP2	cerebal malaria	add	F	0.2077	0.63009	0.741676	1.23(0.36-4.23)	EHA	40/39/5	2001-05-05
Ougadougou	BurkinaFaso	rs1734792	153341060	MECP2	cerebal malaria	add	F	-0.202589	0.320685	0.527557	0.82(0.44-1.53)	HA	196/133/15	23/22/2
All	All	rs1734792	153341060	MECP2	cerebal malaria	add	F	-0.00262442	0.0538072	0.961099	1(0.9-1.11)	EHA	3857/3065/1064	887/562/123
Bamako	Mali	rs1734792	153341060	MECP2	cerebal malaria	rec	F	0.703344	0.920755	0.44494	2.02(0.33-12.28)	EHA	104/49/7	17/13/2
Banjul	Gambia	rs1734792	153341060	MECP2	cerebal malaria	rec	F	-0.29909	0.42101	0.47745	0.74(0.32-1.69)	EHA	1090/476/42	288/103/7
Blantyre	Malawi	rs1734792	153341060	MECP2	cerebal malaria	rec	F	0.307832	0.237196	0.194357	1.36(0.85-2.17)	HA	620/495/77	234/167/32
Buea	Cameroon	rs1734792	153341060	MECP2	cerebal malaria	rec	F	0.896752	1.17966	0.447148	2.45(0.24-24.75)	EHA	97/55/7	2001-05-13
Ho_Chi_Minh_City	VietNam	rs1734792	153341060	MECP2	cerebal malaria	rec	F	0.0641332	0.306246	0.834122	1.07(0.59-1.94)	E	54/445/651	1/18/27
Ibadan	Nigeria	rs1734792	153341060	MECP2	cerebal malaria	rec	F	19.0736	4493.61	0.996613	192111868.54(0-Inf)	EHA	2002-12-08	1/0/1
Kilifi	Kenya	rs1734792	153341060	MECP2	cerebal malaria	rec	F	0.130714	0.20499	0.523695	1.14(0.76-1.7)	EHA	928/842/155	210/188/39
Kumasi	Ghana	rs1734792	153341060	MECP2	cerebal malaria	rec	F	0.0137738	0.456492	0.975929	1.01(0.41-2.48)	EHA	526/380/75	72/34/6
Madang	PapuaNewGuinea	rs1734792	153341060	MECP2	cerebal malaria	rec	F	0.518794	1.14538	0.65059	1.68(0.18-15.86)	E	80/27/5	2001-04-13
Moshi	Tanzania	rs1734792	153341060	MECP2	cerebal malaria	rec	F	1.48913	0.76751	0.0523548	4.43(0.98-19.95)	EHA	114/112/23	2004-03-10
Noguchi	Ghana	rs1734792	153341060	MECP2	cerebal malaria	rec	F	0.810203	1.2736	0.524676	2.25(0.19-27.29)	EHA	40/39/5	2001-05-05
Ougadougou	BurkinaFaso	rs1734792	153341060	MECP2	cerebal malaria	rec	F	-0.659222	0.843414	0.434443	0.52(0.1-2.7)	HA	196/133/15	23/22/2
All	All	rs1734792	153341060	MECP2	cerebal malaria	rec	F	0.16472	0.118855	0.165778	1.18(0.93-1.49)	EHA	3857/3065/1064	887/562/123
Bamako	Mali	rs1734792	153341060	MECP2	cerebal malaria	dom	F	0.779366	0.449323	0.0828229	2.18(0.9-5.26)	EHA	104/49/7	17/13/2
Banjul	Gambia	rs1734792	153341060	MECP2	cerebal malaria	dom	F	-0.151672	0.128079	0.23633	0.86(0.67-1.1)	EHA	1090/476/42	288/103/7
Blantyre	Malawi	rs1734792	153341060	MECP2	cerebal malaria	dom	F	-0.0270954	0.132654	0.838153	0.97(0.75-1.26)	HA	620/495/77	234/167/32
Buea	Cameroon	rs1734792	153341060	MECP2	cerebal malaria	dom	F	-0.0654647	0.560979	0.9071	0.94(0.31-2.81)	EHA	97/55/7	2001-05-13
Ho_Chi_Minh_City	VietNam	rs1734792	153341060	MECP2	cerebal malaria	dom	F	0.809991	1.02114	0.427649	2.25(0.3-16.63)	E	54/445/651	1/18/27
Ibadan	Nigeria	rs1734792	153341060	MECP2	cerebal malaria	dom	F	0.0646963	2.21043	0.97665	1.07(0.01-81.21)	EHA	2002-12-08	1/0/1
Kilifi	Kenya	rs1734792	153341060	MECP2	cerebal malaria	dom	F	0.0444309	0.118043	0.706622	1.05(0.83-1.32)	EHA	928/842/155	210/188/39
Kumasi	Ghana	rs1734792	153341060	MECP2	cerebal malaria	dom	F	-0.368015	0.24676	0.13586	0.69(0.43-1.12)	EHA	526/380/75	72/34/6
Madang	PapuaNewGuinea	rs1734792	153341060	MECP2	cerebal malaria	dom	F	0.373431	0.62553	0.550519	1.45(0.43-4.95)	E	80/27/5	2001-04-13
Moshi	Tanzania	rs1734792	153341060	MECP2	cerebal malaria	dom	F	-0.707241	0.616054	0.250961	0.49(0.15-1.65)	EHA	114/112/23	2004-03-10
Noguchi	Ghana	rs1734792	153341060	MECP2	cerebal malaria	dom	F	0.0517957	0.752877	0.945151	1.05(0.24-4.61)	EHA	40/39/5	2001-05-05
Ougadougou	BurkinaFaso	rs1734792	153341060	MECP2	cerebal malaria	dom	F	-0.121671	0.362847	0.737382	0.89(0.43-1.8)	HA	196/133/15	23/22/2
All	All	rs1734792	153341060	MECP2	cerebal malaria	dom	F	-0.0522459	0.0653202	0.423802	0.95(0.84-1.08)	EHA	3857/3065/1064	887/562/123
Bamako	Mali	rs1734792	153341060	MECP2	cerebal malaria	het	F	0.623913	0.44618	0.162009	1.87(0.78-4.47)	EHA	104/49/7	17/13/2
Banjul	Gambia	rs1734792	153341060	MECP2	cerebal malaria	het	F	-0.126412	0.130294	0.331944	0.88(0.68-1.14)	EHA	1090/476/42	288/103/7
Blantyre	Malawi	rs1734792	153341060	MECP2	cerebal malaria	het	F	-0.103924	0.123853	0.401419	0.9(0.71-1.15)	HA	620/495/77	234/167/32
Buea	Cameroon	rs1734792	153341060	MECP2	cerebal malaria	het	F	-0.234981	0.58241	0.686607	0.79(0.25-2.48)	EHA	97/55/7	2001-05-13
Ho_Chi_Minh_City	VietNam	rs1734792	153341060	MECP2	cerebal malaria	het	F	0.0433481	0.308759	0.888348	1.04(0.57-1.91)	E	54/445/651	1/18/27
Ibadan	Nigeria	rs1734792	153341060	MECP2	cerebal malaria	het	F	-19.2893	5146.27	0.997009	0(0-Inf)	EHA	2002-12-08	1/0/1
Kilifi	Kenya	rs1734792	153341060	MECP2	cerebal malaria	het	F	0.00193019	0.112778	0.986345	1(0.8-1.25)	EHA	928/842/155	210/188/39
Kumasi	Ghana	rs1734792	153341060	MECP2	cerebal malaria	het	F	-0.363966	0.24565	0.138435	0.69(0.43-1.12)	EHA	526/380/75	72/34/6
Madang	PapuaNewGuinea	rs1734792	153341060	MECP2	cerebal malaria	het	F	0.2618	0.656787	0.690182	1.3(0.36-4.71)	E	80/27/5	2001-04-13
Moshi	Tanzania	rs1734792	153341060	MECP2	cerebal malaria	het	F	-1.39096	0.66719	0.0370869	0.25(0.07-0.92)	EHA	114/112/23	2004-03-10
Noguchi	Ghana	rs1734792	153341060	MECP2	cerebal malaria	het	F	-0.171485	0.721806	0.812209	0.84(0.2-3.47)	EHA	40/39/5	2001-05-05
Ougadougou	BurkinaFaso	rs1734792	153341060	MECP2	cerebal malaria	het	F	0.0179962	0.333802	0.957005	1.02(0.53-1.96)	HA	196/133/15	23/22/2
All	All	rs1734792	153341060	MECP2	cerebal malaria	het	F	-0.091512	0.062406	0.14254	0.91(0.81-1.03)	EHA	3857/3065/1064	887/562/123
Bamako	Mali	rs1734792	153341060	MECP2	cerebal malaria	dom	M	0.227216	0.441152	0.606517	1.26(0.53-2.98)	EHA	126/0/41	36/0/10
Banjul	Gambia	rs1734792	153341060	MECP2	cerebal malaria	dom	M	0.00918723	0.15779	0.95357	1.01(0.74-1.37)	EHA	1329/0/284	336/0/67
Blantyre	Malawi	rs1734792	153341060	MECP2	cerebal malaria	dom	M	0.10777	0.153581	0.482857	1.11(0.82-1.5)	HA	955/0/360	318/0/118
Buea	Cameroon	rs1734792	153341060	MECP2	cerebal malaria	dom	M	0.637375	0.542035	0.239638	1.89(0.65-5.47)	EHA	329/0/86	14/0/6
Ho_Chi_Minh_City	VietNam	rs1734792	153341060	MECP2	cerebal malaria	dom	M	0.0641607	0.198445	0.746455	1.07(0.72-1.57)	E	328/0/994	37/0/125
Ibadan	Nigeria	rs1734792	153341060	MECP2	cerebal malaria	dom	M	1.97172e-12	8879.83	1	1(0-Inf)	HA	14/0/3	4/0/0
Kilifi	Kenya	rs1734792	153341060	MECP2	cerebal malaria	dom	M	0.0696279	0.130146	0.592652	1.07(0.83-1.38)	EHA	1376/0/571	324/0/131
Kumasi	Ghana	rs1734792	153341060	MECP2	cerebal malaria	dom	M	-0.320462	0.299248	0.284219	0.73(0.4-1.3)	EHA	768/0/239	94/0/21
Madang	PapuaNewGuinea	rs1734792	153341060	MECP2	cerebal malaria	dom	M	-1.26155	1.06002	0.233999	0.28(0.04-2.26)	E	107/0/20	24/0/1
Moshi	Tanzania	rs1734792	153341060	MECP2	cerebal malaria	dom	M	0.662993	0.641957	0.301712	1.94(0.55-6.83)	EHA	143/0/62	11/0/6
Noguchi	Ghana	rs1734792	153341060	MECP2	cerebal malaria	dom	M	0.022457	0.866722	0.979329	1.02(0.19-5.59)	EHA	78/0/24	8/0/2
Ougadougou	BurkinaFaso	rs1734792	153341060	MECP2	cerebal malaria	dom	M	0.166391	0.369163	0.652188	1.18(0.57-2.43)	HA	283/0/84	46/0/12
All	All	rs1734792	153341060	MECP2	cerebal malaria	dom	M	0.058009	0.0704207	0.410082	1.06(0.92-1.22)	EHA	5822/0/2765	1248/0/499
Bamako	Mali	rs1734792	153341060	MECP2	severe malaria1 anaemia	add	All	0.135935	0.134465	0.312049	1.15(0.88-1.49)	SEHA	230/49/48	116/30/35
Banjul	Gambia	rs1734792	153341060	MECP2	severe malaria1 anaemia	add	All	0.000137411	0.0779997	0.998594	1(0.86-1.17)	SEHA	2419/476/326	347/75/43
Blantyre	Malawi	rs1734792	153341060	MECP2	severe malaria1 anaemia	add	All	0.143143	0.157611	0.36377	1.15(0.85-1.57)	SHA	1575/495/437	73/24/32
Buea	Cameroon	rs1734792	153341060	MECP2	severe malaria1 anaemia	add	All	-0.00836569	0.179724	0.962874	0.99(0.7-1.41)	SEHA	426/55/93	51/14/15
Ho_Chi_Minh_City	VietNam	rs1734792	153341060	MECP2	severe malaria1 anaemia	add	All	0.00567952	0.250941	0.981943	1.01(0.61-1.64)	SE	382/445/1645	2019-08-04
Ibadan	Nigeria	rs1734792	153341060	MECP2	severe malaria1 anaemia	add	All	0.989096	0.650515	0.12839	2.69(0.75-9.62)	SEHA	2005-12-22	2003-02-02
Kilifi	Kenya	rs1734792	153341060	MECP2	severe malaria1 anaemia	add	All	-0.0126017	0.121092	0.917116	0.99(0.78-1.25)	SEHA	2304/842/726	88/31/35
Kumasi	Ghana	rs1734792	153341060	MECP2	severe malaria1 anaemia	add	All	0.0225962	0.0762652	0.767012	1.02(0.88-1.19)	SEHA	1294/380/314	334/109/101
Madang	PapuaNewGuinea	rs1734792	153341060	MECP2	severe malaria1 anaemia	add	All	-0.00685319	0.178641	0.969398	0.99(0.7-1.41)	SE	187/27/25	89/17/9
Moshi	Tanzania	rs1734792	153341060	MECP2	severe malaria1 anaemia	add	All	-0.0209471	0.138344	0.87965	0.98(0.75-1.28)	SEHA	257/112/85	116/30/33
Noguchi	Ghana	rs1734792	153341060	MECP2	severe malaria1 anaemia	add	All	0.0264764	0.139458	0.849425	1.03(0.78-1.35)	SEHA	118/39/29	145/40/47
Ougadougou	BurkinaFaso	rs1734792	153341060	MECP2	severe malaria1 anaemia	add	All	0.393698	0.231753	0.0893608	1.48(0.94-2.33)	SHA	479/133/99	2009-10-19
All	All	rs1734792	153341060	MECP2	severe malaria1 anaemia	add	All	0.0400864	0.0375233	0.285382	1.04(0.97-1.12)	SEHA	9693/3065/3832	1384/390/381
Bamako	Mali	rs1734792	153341060	MECP2	severe malaria1 anaemia	rec	All	0.159942	0.279856	0.567649	1.17(0.68-2.03)	SEHA	230/49/48	116/30/35
Banjul	Gambia	rs1734792	153341060	MECP2	severe malaria1 anaemia	rec	All	-0.137108	0.180224	0.446797	0.87(0.61-1.24)	SEHA	2419/476/326	347/75/43
Blantyre	Malawi	rs1734792	153341060	MECP2	severe malaria1 anaemia	rec	All	0.428423	0.296831	0.14893	1.53(0.86-2.75)	SHA	1575/495/437	73/24/32
Buea	Cameroon	rs1734792	153341060	MECP2	severe malaria1 anaemia	rec	All	0.114344	0.355947	0.748029	1.12(0.56-2.25)	SEHA	426/55/93	51/14/15
Ho_Chi_Minh_City	VietNam	rs1734792	153341060	MECP2	severe malaria1 anaemia	rec	All	-0.0701398	0.393216	0.858429	0.93(0.43-2.01)	SE	382/445/1645	2019-08-04
Ibadan	Nigeria	rs1734792	153341060	MECP2	severe malaria1 anaemia	rec	All	1.75487	1.0847	0.105697	5.78(0.69-48.47)	SEHA	2005-12-22	2003-02-02
Kilifi	Kenya	rs1734792	153341060	MECP2	severe malaria1 anaemia	rec	All	-0.00843704	0.237025	0.971605	0.99(0.62-1.58)	SEHA	2304/842/726	88/31/35
Kumasi	Ghana	rs1734792	153341060	MECP2	severe malaria1 anaemia	rec	All	-0.00946466	0.15714	0.951972	0.99(0.73-1.35)	SEHA	1294/380/314	334/109/101
Madang	PapuaNewGuinea	rs1734792	153341060	MECP2	severe malaria1 anaemia	rec	All	-0.226105	0.40978	0.581106	0.8(0.36-1.78)	SE	187/27/25	89/17/9
Moshi	Tanzania	rs1734792	153341060	MECP2	severe malaria1 anaemia	rec	All	-0.0126829	0.275293	0.963254	0.99(0.58-1.69)	SEHA	257/112/85	116/30/33
Noguchi	Ghana	rs1734792	153341060	MECP2	severe malaria1 anaemia	rec	All	0.102014	0.288681	0.723803	1.11(0.63-1.95)	SEHA	118/39/29	145/40/47
Ougadougou	BurkinaFaso	rs1734792	153341060	MECP2	severe malaria1 anaemia	rec	All	0.686397	0.465752	0.140552	1.99(0.8-4.95)	SHA	479/133/99	2009-10-19
All	All	rs1734792	153341060	MECP2	severe malaria1 anaemia	rec	All	0.0522004	0.0773843	0.499955	1.05(0.91-1.23)	SEHA	9693/3065/3832	1384/390/381
Bamako	Mali	rs1734792	153341060	MECP2	severe malaria1 anaemia	dom	All	0.266175	0.222823	0.232258	1.3(0.84-2.02)	SEHA	230/49/48	116/30/35
Banjul	Gambia	rs1734792	153341060	MECP2	severe malaria1 anaemia	dom	All	0.0631272	0.121021	0.601934	1.07(0.84-1.35)	SEHA	2419/476/326	347/75/43
Blantyre	Malawi	rs1734792	153341060	MECP2	severe malaria1 anaemia	dom	All	0.0806771	0.249508	0.746434	1.08(0.66-1.77)	SHA	1575/495/437	73/24/32
Buea	Cameroon	rs1734792	153341060	MECP2	severe malaria1 anaemia	dom	All	-0.0923317	0.297161	0.756019	0.91(0.51-1.63)	SEHA	426/55/93	51/14/15
Ho_Chi_Minh_City	VietNam	rs1734792	153341060	MECP2	severe malaria1 anaemia	dom	All	0.173587	0.565592	0.758911	1.19(0.39-3.6)	SE	382/445/1645	2019-08-04
Ibadan	Nigeria	rs1734792	153341060	MECP2	severe malaria1 anaemia	dom	All	1.44868	1.34831	0.282624	4.26(0.3-59.82)	SEHA	2005-12-22	2003-02-02
Kilifi	Kenya	rs1734792	153341060	MECP2	severe malaria1 anaemia	dom	All	-0.0292535	0.202635	0.885212	0.97(0.65-1.44)	SEHA	2304/842/726	88/31/35
Kumasi	Ghana	rs1734792	153341060	MECP2	severe malaria1 anaemia	dom	All	0.0659924	0.124854	0.597113	1.07(0.84-1.36)	SEHA	1294/380/314	334/109/101
Madang	PapuaNewGuinea	rs1734792	153341060	MECP2	severe malaria1 anaemia	dom	All	0.0895207	0.279824	0.749031	1.09(0.63-1.89)	SE	187/27/25	89/17/9
Moshi	Tanzania	rs1734792	153341060	MECP2	severe malaria1 anaemia	dom	All	-0.0468771	0.227408	0.836684	0.95(0.61-1.49)	SEHA	257/112/85	116/30/33
Noguchi	Ghana	rs1734792	153341060	MECP2	severe malaria1 anaemia	dom	All	0.00697483	0.23281	0.9761	1.01(0.64-1.59)	SEHA	118/39/29	145/40/47
Ougadougou	BurkinaFaso	rs1734792	153341060	MECP2	severe malaria1 anaemia	dom	All	0.59855	0.393287	0.12803	1.82(0.84-3.93)	SHA	479/133/99	2009-10-19
All	All	rs1734792	153341060	MECP2	severe malaria1 anaemia	dom	All	0.0727879	0.0611496	0.233918	1.08(0.95-1.21)	SEHA	9693/3065/3832	1384/390/381
Bamako	Mali	rs1734792	153341060	MECP2	severe malaria1 anaemia	add	F	0.323499	0.265559	0.223156	1.38(0.82-2.33)	EHA	104/49/7	43/30/5
Banjul	Gambia	rs1734792	153341060	MECP2	severe malaria1 anaemia	add	F	0.0734308	0.141027	0.602585	1.08(0.82-1.42)	EHA	1090/476/42	143/75/3
Blantyre	Malawi	rs1734792	153341060	MECP2	severe malaria1 anaemia	add	F	0.249786	0.244347	0.306658	1.28(0.8-2.07)	HA	620/495/77	31/24/9
Buea	Cameroon	rs1734792	153341060	MECP2	severe malaria1 anaemia	add	F	-0.0841525	0.369183	0.819691	0.92(0.45-1.9)	EHA	97/55/7	21/14/4
Ho_Chi_Minh_City	VietNam	rs1734792	153341060	MECP2	severe malaria1 anaemia	add	F	0.130171	0.434133	0.764298	1.14(0.49-2.67)	E	54/445/651	0/8/9
Ibadan	Nigeria	rs1734792	153341060	MECP2	severe malaria1 anaemia	add	F	1.14477	1.04835	0.274845	3.14(0.4-24.52)	EHA	2002-12-08	2001-02-01
Kilifi	Kenya	rs1734792	153341060	MECP2	severe malaria1 anaemia	add	F	-0.072108	0.219525	0.742554	0.93(0.61-1.43)	EHA	928/842/155	35/31/4
Kumasi	Ghana	rs1734792	153341060	MECP2	severe malaria1 anaemia	add	F	0.0179497	0.137207	0.895916	1.02(0.78-1.33)	EHA	526/380/75	129/109/19
Madang	PapuaNewGuinea	rs1734792	153341060	MECP2	severe malaria1 anaemia	add	F	0.0262166	0.309776	0.932555	1.03(0.56-1.88)	E	80/27/5	43/17/1
Moshi	Tanzania	rs1734792	153341060	MECP2	severe malaria1 anaemia	add	F	-0.16166	0.271414	0.551428	0.85(0.5-1.45)	EHA	114/112/23	39/30/3
Noguchi	Ghana	rs1734792	153341060	MECP2	severe malaria1 anaemia	add	F	0.0388353	0.307689	0.899561	1.04(0.57-1.9)	EHA	40/39/5	43/40/7
Ougadougou	BurkinaFaso	rs1734792	153341060	MECP2	severe malaria1 anaemia	add	F	0.159983	0.448906	0.721552	1.17(0.49-2.83)	HA	196/133/15	2001-10-09
All	All	rs1734792	153341060	MECP2	severe malaria1 anaemia	add	F	0.057733	0.0686734	0.400522	1.06(0.93-1.21)	EHA	3857/3065/1064	537/390/66
Bamako	Mali	rs1734792	153341060	MECP2	severe malaria1 anaemia	rec	F	0.27913	0.63876	0.662121	1.32(0.38-4.62)	EHA	104/49/7	43/30/5
Banjul	Gambia	rs1734792	153341060	MECP2	severe malaria1 anaemia	rec	F	-0.689473	0.612133	0.260019	0.5(0.15-1.67)	EHA	1090/476/42	143/75/3
Blantyre	Malawi	rs1734792	153341060	MECP2	severe malaria1 anaemia	rec	F	0.872382	0.424238	0.0397489	2.39(1.04-5.5)	HA	620/495/77	31/24/9
Buea	Cameroon	rs1734792	153341060	MECP2	severe malaria1 anaemia	rec	F	0.285252	0.791385	0.718514	1.33(0.28-6.27)	EHA	97/55/7	21/14/4
Ho_Chi_Minh_City	VietNam	rs1734792	153341060	MECP2	severe malaria1 anaemia	rec	F	-0.0221185	0.497491	0.964538	0.98(0.37-2.59)	E	54/445/651	0/8/9
Ibadan	Nigeria	rs1734792	153341060	MECP2	severe malaria1 anaemia	rec	F	2.08794	1.63195	0.20075	8.07(0.33-197.65)	EHA	2002-12-08	2001-02-01
Kilifi	Kenya	rs1734792	153341060	MECP2	severe malaria1 anaemia	rec	F	-0.287313	0.543732	0.597216	0.75(0.26-2.18)	EHA	928/842/155	35/31/4
Kumasi	Ghana	rs1734792	153341060	MECP2	severe malaria1 anaemia	rec	F	-0.147903	0.306664	0.629596	0.86(0.47-1.57)	EHA	526/380/75	129/109/19
Madang	PapuaNewGuinea	rs1734792	153341060	MECP2	severe malaria1 anaemia	rec	F	-0.985284	1.11091	0.375125	0.37(0.04-3.29)	E	80/27/5	43/17/1
Moshi	Tanzania	rs1734792	153341060	MECP2	severe malaria1 anaemia	rec	F	-0.644203	0.673531	0.338842	0.53(0.14-1.97)	EHA	114/112/23	39/30/3
Noguchi	Ghana	rs1734792	153341060	MECP2	severe malaria1 anaemia	rec	F	0.455047	0.731242	0.533749	1.58(0.38-6.61)	EHA	40/39/5	43/40/7
Ougadougou	BurkinaFaso	rs1734792	153341060	MECP2	severe malaria1 anaemia	rec	F	-0.212808	1.14621	0.85271	0.81(0.09-7.64)	HA	196/133/15	2001-10-09
All	All	rs1734792	153341060	MECP2	severe malaria1 anaemia	rec	F	-0.0329793	0.159562	0.836255	0.97(0.71-1.32)	EHA	3857/3065/1064	537/390/66
Bamako	Mali	rs1734792	153341060	MECP2	severe malaria1 anaemia	dom	F	0.398145	0.319749	0.213066	1.49(0.8-2.79)	EHA	104/49/7	43/30/5
Banjul	Gambia	rs1734792	153341060	MECP2	severe malaria1 anaemia	dom	F	0.15128	0.156845	0.334786	1.16(0.86-1.58)	EHA	1090/476/42	143/75/3
Blantyre	Malawi	rs1734792	153341060	MECP2	severe malaria1 anaemia	dom	F	-0.000105402	0.307271	0.999726	1(0.55-1.83)	HA	620/495/77	31/24/9
Buea	Cameroon	rs1734792	153341060	MECP2	severe malaria1 anaemia	dom	F	-0.199582	0.436883	0.647792	0.82(0.35-1.93)	EHA	97/55/7	21/14/4
Ho_Chi_Minh_City	VietNam	rs1734792	153341060	MECP2	severe malaria1 anaemia	dom	F	14.4036	871.726	0.986817	1800533.15(0-Inf)	E	54/445/651	0/8/9
Ibadan	Nigeria	rs1734792	153341060	MECP2	severe malaria1 anaemia	dom	F	0.999816	1.81042	0.580772	2.72(0.08-94.46)	EHA	2002-12-08	2001-02-01
Kilifi	Kenya	rs1734792	153341060	MECP2	severe malaria1 anaemia	dom	F	-0.03097	0.266529	0.907496	0.97(0.58-1.63)	EHA	928/842/155	35/31/4
Kumasi	Ghana	rs1734792	153341060	MECP2	severe malaria1 anaemia	dom	F	0.0769109	0.172668	0.656012	1.08(0.77-1.51)	EHA	526/380/75	129/109/19
Madang	PapuaNewGuinea	rs1734792	153341060	MECP2	severe malaria1 anaemia	dom	F	0.180006	0.368515	0.625223	1.2(0.58-2.47)	E	80/27/5	43/17/1
Moshi	Tanzania	rs1734792	153341060	MECP2	severe malaria1 anaemia	dom	F	-0.0590146	0.321737	0.854464	0.94(0.5-1.77)	EHA	114/112/23	39/30/3
Noguchi	Ghana	rs1734792	153341060	MECP2	severe malaria1 anaemia	dom	F	-0.0606775	0.361639	0.866753	0.94(0.46-1.91)	EHA	40/39/5	43/40/7
Ougadougou	BurkinaFaso	rs1734792	153341060	MECP2	severe malaria1 anaemia	dom	F	0.260933	0.52226	0.617341	1.3(0.47-3.61)	HA	196/133/15	2001-10-09
All	All	rs1734792	153341060	MECP2	severe malaria1 anaemia	dom	F	0.0937206	0.08325	0.260261	1.1(0.93-1.29)	EHA	3857/3065/1064	537/390/66
Bamako	Mali	rs1734792	153341060	MECP2	severe malaria1 anaemia	het	F	0.313171	0.31102	0.313974	1.37(0.74-2.52)	EHA	104/49/7	43/30/5
Banjul	Gambia	rs1734792	153341060	MECP2	severe malaria1 anaemia	het	F	0.213891	0.15706	0.173248	1.24(0.91-1.68)	EHA	1090/476/42	143/75/3
Blantyre	Malawi	rs1734792	153341060	MECP2	severe malaria1 anaemia	het	F	-0.314491	0.282215	0.265122	0.73(0.42-1.27)	HA	620/495/77	31/24/9
Buea	Cameroon	rs1734792	153341060	MECP2	severe malaria1 anaemia	het	F	-0.246202	0.409198	0.547394	0.78(0.35-1.74)	EHA	97/55/7	21/14/4
Ho_Chi_Minh_City	VietNam	rs1734792	153341060	MECP2	severe malaria1 anaemia	het	F	0.221341	0.496718	0.655881	1.25(0.47-3.3)	E	54/445/651	0/8/9
Ibadan	Nigeria	rs1734792	153341060	MECP2	severe malaria1 anaemia	het	F	-1.189	1.82434	0.514568	0.3(0.01-10.88)	EHA	2002-12-08	2001-02-01
Kilifi	Kenya	rs1734792	153341060	MECP2	severe malaria1 anaemia	het	F	0.0418364	0.255538	0.869953	1.04(0.63-1.72)	EHA	928/842/155	35/31/4
Kumasi	Ghana	rs1734792	153341060	MECP2	severe malaria1 anaemia	het	F	0.114186	0.16454	0.487702	1.12(0.81-1.55)	EHA	526/380/75	129/109/19
Madang	PapuaNewGuinea	rs1734792	153341060	MECP2	severe malaria1 anaemia	het	F	0.345023	0.379909	0.363787	1.41(0.67-2.97)	E	80/27/5	43/17/1
Moshi	Tanzania	rs1734792	153341060	MECP2	severe malaria1 anaemia	het	F	0.0961318	0.297812	0.746852	1.1(0.61-1.97)	EHA	114/112/23	39/30/3
Noguchi	Ghana	rs1734792	153341060	MECP2	severe malaria1 anaemia	het	F	-0.154451	0.340007	0.649643	0.86(0.44-1.67)	EHA	40/39/5	43/40/7
Ougadougou	BurkinaFaso	rs1734792	153341060	MECP2	severe malaria1 anaemia	het	F	0.266747	0.48671	0.58365	1.31(0.5-3.39)	HA	196/133/15	2001-10-09
All	All	rs1734792	153341060	MECP2	severe malaria1 anaemia	het	F	0.0938861	0.0795134	0.237699	1.1(0.94-1.28)	EHA	3857/3065/1064	537/390/66
Bamako	Mali	rs1734792	153341060	MECP2	severe malaria1 anaemia	dom	M	0.192864	0.322127	0.54936	1.21(0.65-2.28)	EHA	126/0/41	73/0/30
Banjul	Gambia	rs1734792	153341060	MECP2	severe malaria1 anaemia	dom	M	-0.0595396	0.194484	0.759497	0.94(0.64-1.38)	EHA	1329/0/284	204/0/40
Blantyre	Malawi	rs1734792	153341060	MECP2	severe malaria1 anaemia	dom	M	0.185691	0.340183	0.585165	1.2(0.62-2.35)	HA	955/0/360	42/0/23
Buea	Cameroon	rs1734792	153341060	MECP2	severe malaria1 anaemia	dom	M	0.0592987	0.463263	0.898147	1.06(0.43-2.63)	EHA	329/0/86	30/0/11
Ho_Chi_Minh_City	VietNam	rs1734792	153341060	MECP2	severe malaria1 anaemia	dom	M	-0.0973551	0.602321	0.871595	0.91(0.28-2.95)	E	328/0/994	4/0/10
Ibadan	Nigeria	rs1734792	153341060	MECP2	severe malaria1 anaemia	dom	M	19.4469	4776.32	0.996751	279057704.18(0-Inf)	HA	14/0/3	1/0/2
Kilifi	Kenya	rs1734792	153341060	MECP2	severe malaria1 anaemia	dom	M	0.0017004	0.271311	0.994999	1(0.59-1.7)	EHA	1376/0/571	53/0/31
Kumasi	Ghana	rs1734792	153341060	MECP2	severe malaria1 anaemia	dom	M	0.051317	0.188682	0.78564	1.05(0.73-1.52)	EHA	768/0/239	205/0/82
Madang	PapuaNewGuinea	rs1734792	153341060	MECP2	severe malaria1 anaemia	dom	M	-0.102423	0.480508	0.831206	0.9(0.35-2.31)	E	107/0/20	46/0/8
Moshi	Tanzania	rs1734792	153341060	MECP2	severe malaria1 anaemia	dom	M	0.0922007	0.341159	0.786963	1.1(0.56-2.14)	EHA	143/0/62	77/0/30
Noguchi	Ghana	rs1734792	153341060	MECP2	severe malaria1 anaemia	dom	M	0.0467418	0.330291	0.887462	1.05(0.55-2)	EHA	78/0/24	102/0/40
Ougadougou	BurkinaFaso	rs1734792	153341060	MECP2	severe malaria1 anaemia	dom	M	0.956348	0.534887	0.073785	2.6(0.91-7.42)	HA	283/0/84	10/0/8
All	All	rs1734792	153341060	MECP2	severe malaria1 anaemia	dom	M	0.071409	0.0906764	0.430981	1.07(0.9-1.28)	EHA	5836/0/2768	847/0/315
Bamako	Mali	rs1734792	153341060	MECP2	cerebral malaria and severe malaria1 anaemia	add	All	0.231793	0.194261	0.23279	1.26(0.86-1.85)	SEHA	230/49/48	38/18/13
Banjul	Gambia	rs1734792	153341060	MECP2	cerebral malaria and severe malaria1 anaemia	add	All	-0.100652	0.152998	0.510626	0.9(0.67-1.22)	SEHA	2419/476/326	108/14/13
Blantyre	Malawi	rs1734792	153341060	MECP2	cerebral malaria and severe malaria1 anaemia	add	All	0.0376723	0.127081	0.766892	1.04(0.81-1.33)	SHA	1575/495/437	93/24/40
Buea	Cameroon	rs1734792	153341060	MECP2	cerebral malaria and severe malaria1 anaemia	add	All	-0.144314	0.821985	0.860633	0.87(0.17-4.34)	SEHA	426/55/93	2001-01-05
Ho_Chi_Minh_City	VietNam	rs1734792	153341060	MECP2	cerebral malaria and severe malaria1 anaemia	add	All	0.268781	0.749928	0.720037	1.31(0.3-5.69)	SE	382/445/1645	2006-01-01
Ibadan	Nigeria	rs1734792	153341060	MECP2	cerebral malaria and severe malaria1 anaemia	add	All	4.80641e-15	0.301858	1	1(0.55-1.81)	SEHA	2005-12-22	0/0/0
Kilifi	Kenya	rs1734792	153341060	MECP2	cerebral malaria and severe malaria1 anaemia	add	All	0.0344191	0.0980717	0.725619	1.04(0.85-1.25)	SEHA	2304/842/726	125/46/39
Kumasi	Ghana	rs1734792	153341060	MECP2	cerebral malaria and severe malaria1 anaemia	add	All	0.210152	0.147682	0.154733	1.23(0.92-1.65)	SEHA	1294/380/314	49/6/20
Madang	PapuaNewGuinea	rs1734792	153341060	MECP2	cerebral malaria and severe malaria1 anaemia	add	All	1.08249	0.418543	0.00970073	2.95(1.3-6.7)	SE	187/27/25	2002-02-05
Moshi	Tanzania	rs1734792	153341060	MECP2	cerebral malaria and severe malaria1 anaemia	add	All	-0.539185	0.338105	0.110773	0.58(0.3-1.13)	SEHA	257/112/85	2004-05-19
Noguchi	Ghana	rs1734792	153341060	MECP2	cerebral malaria and severe malaria1 anaemia	add	All	0.236773	0.32223	0.462465	1.27(0.67-2.38)	SEHA	118/39/29	2003-03-08
Ougadougou	BurkinaFaso	rs1734792	153341060	MECP2	cerebral malaria and severe malaria1 anaemia	add	All	0.161712	0.354337	0.648117	1.18(0.59-2.35)	SHA	479/133/99	2005-02-13
All	All	rs1734792	153341060	MECP2	cerebral malaria and severe malaria1 anaemia	add	All	0.0592001	0.0559298	0.28984	1.06(0.95-1.18)	SEHA	9693/3065/3832	464/122/146
Bamako	Mali	rs1734792	153341060	MECP2	cerebral malaria and severe malaria1 anaemia	rec	All	0.1348	0.419588	0.748008	1.14(0.5-2.6)	SEHA	230/49/48	38/18/13
Banjul	Gambia	rs1734792	153341060	MECP2	cerebral malaria and severe malaria1 anaemia	rec	All	-0.0551575	0.319738	0.863038	0.95(0.51-1.77)	SEHA	2419/476/326	108/14/13
Blantyre	Malawi	rs1734792	153341060	MECP2	cerebral malaria and severe malaria1 anaemia	rec	All	0.292628	0.231892	0.20698	1.34(0.85-2.11)	SHA	1575/495/437	93/24/40
Buea	Cameroon	rs1734792	153341060	MECP2	cerebral malaria and severe malaria1 anaemia	rec	All	-0.149229	1.55654	0.923622	0.86(0.04-18.2)	SEHA	426/55/93	2001-01-05
Ho_Chi_Minh_City	VietNam	rs1734792	153341060	MECP2	cerebral malaria and severe malaria1 anaemia	rec	All	0.706025	0.812537	0.384894	2.03(0.41-9.96)	SE	382/445/1645	2006-01-01
Ibadan	Nigeria	rs1734792	153341060	MECP2	cerebral malaria and severe malaria1 anaemia	rec	All	3.6287e-15	0.527677	1	1(0.36-2.81)	SEHA	2005-12-22	0/0/0
Kilifi	Kenya	rs1734792	153341060	MECP2	cerebral malaria and severe malaria1 anaemia	rec	All	0.0608379	0.195232	0.75533	1.06(0.72-1.56)	SEHA	2304/842/726	125/46/39
Kumasi	Ghana	rs1734792	153341060	MECP2	cerebral malaria and severe malaria1 anaemia	rec	All	0.5821	0.279878	0.037541	1.79(1.03-3.1)	SEHA	1294/380/314	49/6/20
Madang	PapuaNewGuinea	rs1734792	153341060	MECP2	cerebral malaria and severe malaria1 anaemia	rec	All	1.59926	0.857091	0.0620533	4.95(0.92-26.55)	SE	187/27/25	2002-02-05
Moshi	Tanzania	rs1734792	153341060	MECP2	cerebral malaria and severe malaria1 anaemia	rec	All	-0.693514	0.59102	0.240627	0.5(0.16-1.59)	SEHA	257/112/85	2004-05-19
Noguchi	Ghana	rs1734792	153341060	MECP2	cerebral malaria and severe malaria1 anaemia	rec	All	0.493692	0.580657	0.395198	1.64(0.52-5.11)	SEHA	118/39/29	2003-03-08
Ougadougou	BurkinaFaso	rs1734792	153341060	MECP2	cerebral malaria and severe malaria1 anaemia	rec	All	0.690377	0.636342	0.27796	1.99(0.57-6.94)	SHA	479/133/99	2005-02-13
All	All	rs1734792	153341060	MECP2	cerebral malaria and severe malaria1 anaemia	rec	All	0.205133	0.109178	0.0602599	1.23(0.99-1.52)	SEHA	9693/3065/3832	464/122/146
Bamako	Mali	rs1734792	153341060	MECP2	cerebral malaria and severe malaria1 anaemia	dom	All	0.517398	0.314248	0.0996681	1.68(0.91-3.11)	SEHA	230/49/48	38/18/13
Banjul	Gambia	rs1734792	153341060	MECP2	cerebral malaria and severe malaria1 anaemia	dom	All	-0.214588	0.233131	0.357331	0.81(0.51-1.27)	SEHA	2419/476/326	108/14/13
Blantyre	Malawi	rs1734792	153341060	MECP2	cerebral malaria and severe malaria1 anaemia	dom	All	-0.104786	0.214671	0.625461	0.9(0.59-1.37)	SHA	1575/495/437	93/24/40
Buea	Cameroon	rs1734792	153341060	MECP2	cerebral malaria and severe malaria1 anaemia	dom	All	-0.284661	1.26722	0.822264	0.75(0.06-9.02)	SEHA	426/55/93	2001-01-05
Ho_Chi_Minh_City	VietNam	rs1734792	153341060	MECP2	cerebral malaria and severe malaria1 anaemia	dom	All	-0.682004	1.27059	0.591433	0.51(0.04-6.1)	SE	382/445/1645	2006-01-01
Ibadan	Nigeria	rs1734792	153341060	MECP2	cerebral malaria and severe malaria1 anaemia	dom	All	6.19232e-15	0.50505	1	1(0.37-2.69)	SEHA	2005-12-22	0/0/0
Kilifi	Kenya	rs1734792	153341060	MECP2	cerebral malaria and severe malaria1 anaemia	dom	All	0.0516234	0.162793	0.751159	1.05(0.77-1.45)	SEHA	2304/842/726	125/46/39
Kumasi	Ghana	rs1734792	153341060	MECP2	cerebral malaria and severe malaria1 anaemia	dom	All	0.195724	0.276967	0.479773	1.22(0.71-2.09)	SEHA	1294/380/314	49/6/20
Madang	PapuaNewGuinea	rs1734792	153341060	MECP2	cerebral malaria and severe malaria1 anaemia	dom	All	2.1364	0.825114	0.00961943	8.47(1.68-42.67)	SE	187/27/25	2002-02-05
Moshi	Tanzania	rs1734792	153341060	MECP2	cerebral malaria and severe malaria1 anaemia	dom	All	-0.81412	0.539818	0.131519	0.44(0.15-1.28)	SEHA	257/112/85	2004-05-19
Noguchi	Ghana	rs1734792	153341060	MECP2	cerebral malaria and severe malaria1 anaemia	dom	All	0.310104	0.599087	0.604718	1.36(0.42-4.41)	SEHA	118/39/29	2003-03-08
Ougadougou	BurkinaFaso	rs1734792	153341060	MECP2	cerebral malaria and severe malaria1 anaemia	dom	All	-0.0306136	0.601363	0.9594	0.97(0.3-3.15)	SHA	479/133/99	2005-02-13
All	All	rs1734792	153341060	MECP2	cerebral malaria and severe malaria1 anaemia	dom	All	0.0255937	0.0928133	0.782737	1.03(0.86-1.23)	SEHA	9693/3065/3832	464/122/146
Bamako	Mali	rs1734792	153341060	MECP2	cerebral malaria and severe malaria1 anaemia	add	F	0.423451	0.369139	0.251327	1.53(0.74-3.15)	EHA	104/49/7	17/18/1
Banjul	Gambia	rs1734792	153341060	MECP2	cerebral malaria and severe malaria1 anaemia	add	F	-0.142594	0.269889	0.597262	0.87(0.51-1.47)	EHA	1090/476/42	46/14/2
Blantyre	Malawi	rs1734792	153341060	MECP2	cerebral malaria and severe malaria1 anaemia	add	F	-0.328358	0.258843	0.204598	0.72(0.43-1.2)	HA	620/495/77	41/24/5
Buea	Cameroon	rs1734792	153341060	MECP2	cerebral malaria and severe malaria1 anaemia	add	F	-0.153182	1.12982	0.892153	0.86(0.09-7.86)	EHA	97/55/7	2000-01-02
Ho_Chi_Minh_City	VietNam	rs1734792	153341060	MECP2	cerebral malaria and severe malaria1 anaemia	add	F	0.124574	0.667977	0.852058	1.13(0.31-4.19)	E	54/445/651	2005-01-01
Ibadan	Nigeria	rs1734792	153341060	MECP2	cerebral malaria and severe malaria1 anaemia	add	F	5.83781e-16	98232.4	1	1(0-Inf)	EHA	2002-12-08	0/0/0
Kilifi	Kenya	rs1734792	153341060	MECP2	cerebral malaria and severe malaria1 anaemia	add	F	-0.16406	0.182138	0.367725	0.85(0.59-1.21)	EHA	928/842/155	56/46/4
Kumasi	Ghana	rs1734792	153341060	MECP2	cerebral malaria and severe malaria1 anaemia	add	F	-0.269584	0.424223	0.525117	0.76(0.33-1.75)	EHA	526/380/75	2002-06-17
Madang	PapuaNewGuinea	rs1734792	153341060	MECP2	cerebral malaria and severe malaria1 anaemia	add	F	1.29755	0.972702	0.182215	3.66(0.54-24.63)	E	80/27/5	2000-02-03
Moshi	Tanzania	rs1734792	153341060	MECP2	cerebral malaria and severe malaria1 anaemia	add	F	-0.351797	0.524542	0.502428	0.7(0.25-1.97)	EHA	114/112/23	2001-05-09
Noguchi	Ghana	rs1734792	153341060	MECP2	cerebral malaria and severe malaria1 anaemia	add	F	0.0262616	0.746625	0.971941	1.03(0.24-4.44)	EHA	40/39/5	2000-03-04
Ougadougou	BurkinaFaso	rs1734792	153341060	MECP2	cerebral malaria and severe malaria1 anaemia	add	F	-0.474499	0.718717	0.509124	0.62(0.15-2.55)	HA	196/133/15	2001-02-06
All	All	rs1734792	153341060	MECP2	cerebral malaria and severe malaria1 anaemia	add	F	-0.129238	0.108484	0.233531	0.88(0.71-1.09)	EHA	3857/3065/1064	202/122/21
Bamako	Mali	rs1734792	153341060	MECP2	cerebral malaria and severe malaria1 anaemia	rec	F	-0.865844	1.13879	0.447065	0.42(0.05-3.92)	EHA	104/49/7	17/18/1
Banjul	Gambia	rs1734792	153341060	MECP2	cerebral malaria and severe malaria1 anaemia	rec	F	0.383907	0.75223	0.609801	1.47(0.34-6.41)	EHA	1090/476/42	46/14/2
Blantyre	Malawi	rs1734792	153341060	MECP2	cerebral malaria and severe malaria1 anaemia	rec	F	0.0747663	0.51544	0.884669	1.08(0.39-2.96)	HA	620/495/77	41/24/5
Buea	Cameroon	rs1734792	153341060	MECP2	cerebral malaria and severe malaria1 anaemia	rec	F	-17.0026	9199.87	0.998525	0(0-Inf)	EHA	97/55/7	2000-01-02
Ho_Chi_Minh_City	VietNam	rs1734792	153341060	MECP2	cerebral malaria and severe malaria1 anaemia	rec	F	0.609191	0.838917	0.467739	1.84(0.36-9.52)	E	54/445/651	2005-01-01
Ibadan	Nigeria	rs1734792	153341060	MECP2	cerebral malaria and severe malaria1 anaemia	rec	F	1.29118e-14	163936	1	1(0-Inf)	EHA	2002-12-08	0/0/0
Kilifi	Kenya	rs1734792	153341060	MECP2	cerebral malaria and severe malaria1 anaemia	rec	F	-0.750861	0.534263	0.159898	0.47(0.17-1.34)	EHA	928/842/155	56/46/4
Kumasi	Ghana	rs1734792	153341060	MECP2	cerebral malaria and severe malaria1 anaemia	rec	F	0.414905	0.790756	0.599795	1.51(0.32-7.13)	EHA	526/380/75	2002-06-17
Madang	PapuaNewGuinea	rs1734792	153341060	MECP2	cerebral malaria and severe malaria1 anaemia	rec	F	-15.8284	4809.34	0.997374	0(0-Inf)	E	80/27/5	2000-02-03
Moshi	Tanzania	rs1734792	153341060	MECP2	cerebral malaria and severe malaria1 anaemia	rec	F	-0.0239406	1.15154	0.983413	0.98(0.1-9.33)	EHA	114/112/23	2001-05-09
Noguchi	Ghana	rs1734792	153341060	MECP2	cerebral malaria and severe malaria1 anaemia	rec	F	-15.967	2688.12	0.995261	0(0-Inf)	EHA	40/39/5	2000-03-04
Ougadougou	BurkinaFaso	rs1734792	153341060	MECP2	cerebral malaria and severe malaria1 anaemia	rec	F	0.842342	1.23102	0.493808	2.32(0.21-25.92)	HA	196/133/15	2001-02-06
All	All	rs1734792	153341060	MECP2	cerebral malaria and severe malaria1 anaemia	rec	F	-0.120652	0.254362	0.635263	0.89(0.54-1.46)	EHA	3857/3065/1064	202/122/21
Bamako	Mali	rs1734792	153341060	MECP2	cerebral malaria and severe malaria1 anaemia	dom	F	0.764612	0.444023	0.0850676	2.15(0.9-5.13)	EHA	104/49/7	17/18/1
Banjul	Gambia	rs1734792	153341060	MECP2	cerebral malaria and severe malaria1 anaemia	dom	F	-0.2301	0.303069	0.447714	0.79(0.44-1.44)	EHA	1090/476/42	46/14/2
Blantyre	Malawi	rs1734792	153341060	MECP2	cerebral malaria and severe malaria1 anaemia	dom	F	-0.484027	0.304322	0.11172	0.62(0.34-1.12)	HA	620/495/77	41/24/5
Buea	Cameroon	rs1734792	153341060	MECP2	cerebral malaria and severe malaria1 anaemia	dom	F	-0.0466192	1.24943	0.970236	0.95(0.08-11.05)	EHA	97/55/7	2000-01-02
Ho_Chi_Minh_City	VietNam	rs1734792	153341060	MECP2	cerebral malaria and severe malaria1 anaemia	dom	F	-1.23644	1.08979	0.256555	0.29(0.03-2.46)	E	54/445/651	2005-01-01
Ibadan	Nigeria	rs1734792	153341060	MECP2	cerebral malaria and severe malaria1 anaemia	dom	F	-1.70229e-14	145443	1	1(0-Inf)	EHA	2002-12-08	0/0/0
Kilifi	Kenya	rs1734792	153341060	MECP2	cerebral malaria and severe malaria1 anaemia	dom	F	-0.0747113	0.217609	0.731351	0.93(0.61-1.42)	EHA	928/842/155	56/46/4
Kumasi	Ghana	rs1734792	153341060	MECP2	cerebral malaria and severe malaria1 anaemia	dom	F	-0.558924	0.522472	0.284724	0.57(0.21-1.59)	EHA	526/380/75	2002-06-17
Madang	PapuaNewGuinea	rs1734792	153341060	MECP2	cerebral malaria and severe malaria1 anaemia	dom	F	18.7675	3546.24	0.995777	141453920.66(0-Inf)	E	80/27/5	2000-02-03
Moshi	Tanzania	rs1734792	153341060	MECP2	cerebral malaria and severe malaria1 anaemia	dom	F	-0.485445	0.614798	0.429761	0.62(0.18-2.05)	EHA	114/112/23	2001-05-09
Noguchi	Ghana	rs1734792	153341060	MECP2	cerebral malaria and severe malaria1 anaemia	dom	F	0.286791	0.879847	0.744458	1.33(0.24-7.47)	EHA	40/39/5	2000-03-04
Ougadougou	BurkinaFaso	rs1734792	153341060	MECP2	cerebral malaria and severe malaria1 anaemia	dom	F	-0.925833	0.846361	0.274	0.4(0.08-2.08)	HA	196/133/15	2001-02-06
All	All	rs1734792	153341060	MECP2	cerebral malaria and severe malaria1 anaemia	dom	F	-0.153367	0.129255	0.235407	0.86(0.67-1.11)	EHA	3857/3065/1064	202/122/21
Bamako	Mali	rs1734792	153341060	MECP2	cerebral malaria and severe malaria1 anaemia	het	F	0.861708	0.427308	0.0437377	2.37(1.02-5.47)	EHA	104/49/7	17/18/1
Banjul	Gambia	rs1734792	153341060	MECP2	cerebral malaria and severe malaria1 anaemia	het	F	-0.296365	0.314353	0.345795	0.74(0.4-1.38)	EHA	1090/476/42	46/14/2
Blantyre	Malawi	rs1734792	153341060	MECP2	cerebral malaria and severe malaria1 anaemia	het	F	-0.422452	0.276458	0.126491	0.66(0.38-1.13)	HA	620/495/77	41/24/5
Buea	Cameroon	rs1734792	153341060	MECP2	cerebral malaria and severe malaria1 anaemia	het	F	0.1034	1.2493	0.934037	1.11(0.1-12.83)	EHA	97/55/7	2000-01-02
Ho_Chi_Minh_City	VietNam	rs1734792	153341060	MECP2	cerebral malaria and severe malaria1 anaemia	het	F	-1.29224	1.08194	0.232331	0.27(0.03-2.29)	E	54/445/651	2005-01-01
Ibadan	Nigeria	rs1734792	153341060	MECP2	cerebral malaria and severe malaria1 anaemia	het	F	-1.39143e-14	123717	1	1(0-Inf)	EHA	2002-12-08	0/0/0
Kilifi	Kenya	rs1734792	153341060	MECP2	cerebral malaria and severe malaria1 anaemia	het	F	0.0838843	0.209369	0.688675	1.09(0.72-1.64)	EHA	928/842/155	56/46/4
Kumasi	Ghana	rs1734792	153341060	MECP2	cerebral malaria and severe malaria1 anaemia	het	F	-0.703103	0.537647	0.190962	0.5(0.17-1.42)	EHA	526/380/75	2002-06-17
Madang	PapuaNewGuinea	rs1734792	153341060	MECP2	cerebral malaria and severe malaria1 anaemia	het	F	18.9654	3421.99	0.995578	172419062.63(0-Inf)	E	80/27/5	2000-02-03
Moshi	Tanzania	rs1734792	153341060	MECP2	cerebral malaria and severe malaria1 anaemia	het	F	-0.433073	0.587118	0.460742	0.65(0.21-2.05)	EHA	114/112/23	2001-05-09
Noguchi	Ghana	rs1734792	153341060	MECP2	cerebral malaria and severe malaria1 anaemia	het	F	0.545917	0.883969	0.536855	1.73(0.31-9.76)	EHA	40/39/5	2000-03-04
Ougadougou	BurkinaFaso	rs1734792	153341060	MECP2	cerebral malaria and severe malaria1 anaemia	het	F	-1.08267	0.833978	0.19422	0.34(0.07-1.74)	HA	196/133/15	2001-02-06
All	All	rs1734792	153341060	MECP2	cerebral malaria and severe malaria1 anaemia	het	F	-0.111154	0.123552	0.368306	0.89(0.7-1.14)	EHA	3857/3065/1064	202/122/21
Bamako	Mali	rs1734792	153341060	MECP2	cerebral malaria and severe malaria1 anaemia	dom	M	0.33808	0.454545	0.457012	1.4(0.58-3.42)	EHA	126/0/41	21/0/12
Banjul	Gambia	rs1734792	153341060	MECP2	cerebral malaria and severe malaria1 anaemia	dom	M	-0.175464	0.353004	0.619147	0.84(0.42-1.68)	EHA	1329/0/284	62/0/11
Blantyre	Malawi	rs1734792	153341060	MECP2	cerebral malaria and severe malaria1 anaemia	dom	M	0.330475	0.296928	0.265717	1.39(0.78-2.49)	HA	955/0/360	52/0/35
Buea	Cameroon	rs1734792	153341060	MECP2	cerebral malaria and severe malaria1 anaemia	dom	M	-0.0795669	1.30321	0.951316	0.92(0.07-11.88)	EHA	329/0/86	3/0/1
Ho_Chi_Minh_City	VietNam	rs1734792	153341060	MECP2	cerebral malaria and severe malaria1 anaemia	dom	M	16.5906	4323.77	0.996938	16039368.96(0-Inf)	E	328/0/994	0/0/1
Ibadan	Nigeria	rs1734792	153341060	MECP2	cerebral malaria and severe malaria1 anaemia	dom	M	5.36721e-31	178356	1	1(0-Inf)	HA	14/0/3	0/0/0
Kilifi	Kenya	rs1734792	153341060	MECP2	cerebral malaria and severe malaria1 anaemia	dom	M	0.233755	0.244972	0.339978	1.26(0.78-2.04)	EHA	1376/0/571	69/0/35
Kumasi	Ghana	rs1734792	153341060	MECP2	cerebral malaria and severe malaria1 anaemia	dom	M	0.613645	0.362552	0.0905369	1.85(0.91-3.76)	EHA	768/0/239	32/0/18
Madang	PapuaNewGuinea	rs1734792	153341060	MECP2	cerebral malaria and severe malaria1 anaemia	dom	M	1.97187	1.08464	0.0690643	7.18(0.86-60.2)	E	107/0/20	2/0/2
Moshi	Tanzania	rs1734792	153341060	MECP2	cerebral malaria and severe malaria1 anaemia	dom	M	-1.83537	1.20253	0.126946	0.16(0.02-1.68)	EHA	143/0/62	10/0/3
Noguchi	Ghana	rs1734792	153341060	MECP2	cerebral malaria and severe malaria1 anaemia	dom	M	0.542607	0.926788	0.558231	1.72(0.28-10.58)	EHA	78/0/24	4/0/3
Ougadougou	BurkinaFaso	rs1734792	153341060	MECP2	cerebral malaria and severe malaria1 anaemia	dom	M	0.652661	0.69245	0.345917	1.92(0.49-7.46)	HA	283/0/84	7/0/4
All	All	rs1734792	153341060	MECP2	cerebral malaria and severe malaria1 anaemia	dom	M	0.263887	0.133288	0.0477239	1.3(1-1.69)	EHA	5508/0/1774	262/0/124
Bamako	Mali	rs1734792	153341060	MECP2	other severe malaria	add	All	-0.0763371	0.158948	0.63104	0.93(0.68-1.27)	SEHA	230/49/48	79/13/15
Banjul	Gambia	rs1734792	153341060	MECP2	other severe malaria	add	All	-0.0154202	0.0579993	0.79034	0.98(0.88-1.1)	SEHA	2419/476/326	824/136/106
Blantyre	Malawi	rs1734792	153341060	MECP2	other severe malaria	add	All	0.198231	0.112414	0.0778313	1.22(0.98-1.52)	SHA	1575/495/437	128/45/46
Buea	Cameroon	rs1734792	153341060	MECP2	other severe malaria	add	All	0.0363509	0.0948176	0.70144	1.04(0.86-1.25)	SEHA	426/55/93	347/68/70
Ho_Chi_Minh_City	VietNam	rs1734792	153341060	MECP2	other severe malaria	add	All	0.019881	0.0612363	0.745438	1.02(0.9-1.15)	SE	382/445/1645	102/54/385
Ibadan	Nigeria	rs1734792	153341060	MECP2	other severe malaria	add	All	0.103975	0.300072	0.728966	1.11(0.62-2)	SEHA	2005-12-22	46/9/9
Kilifi	Kenya	rs1734792	153341060	MECP2	other severe malaria	add	All	0.0183827	0.0521459	0.724445	1.02(0.92-1.13)	SEHA	2304/842/726	579/194/194
Kumasi	Ghana	rs1734792	153341060	MECP2	other severe malaria	add	All	-0.117812	0.0744368	0.113486	0.89(0.77-1.03)	SEHA	1294/380/314	437/98/92
Madang	PapuaNewGuinea	rs1734792	153341060	MECP2	other severe malaria	add	All	-0.102382	0.149097	0.492287	0.9(0.67-1.21)	SE	187/27/25	173/14/22
Moshi	Tanzania	rs1734792	153341060	MECP2	other severe malaria	add	All	0.0917581	0.131875	0.486555	1.1(0.85-1.42)	SEHA	257/112/85	116/30/39
Noguchi	Ghana	rs1734792	153341060	MECP2	other severe malaria	add	All	0.0274734	0.130033	0.832668	1.03(0.8-1.33)	SEHA	118/39/29	243/64/70
Ougadougou	BurkinaFaso	rs1734792	153341060	MECP2	other severe malaria	add	All	-0.0930033	0.0838792	0.267527	0.91(0.77-1.07)	SHA	479/133/99	476/93/104
All	All	rs1734792	153341060	MECP2	other severe malaria	add	All	-0.00460736	0.0246866	0.851948	1(0.95-1.04)	SEHA	9693/3065/3832	3550/818/1152
Bamako	Mali	rs1734792	153341060	MECP2	other severe malaria	rec	All	-0.149278	0.337018	0.657811	0.86(0.44-1.67)	SEHA	230/49/48	79/13/15
Banjul	Gambia	rs1734792	153341060	MECP2	other severe malaria	rec	All	0.0182923	0.12809	0.886441	1.02(0.79-1.31)	SEHA	2419/476/326	824/136/106
Blantyre	Malawi	rs1734792	153341060	MECP2	other severe malaria	rec	All	0.385312	0.227329	0.0900841	1.47(0.94-2.3)	SHA	1575/495/437	128/45/46
Buea	Cameroon	rs1734792	153341060	MECP2	other severe malaria	rec	All	0.198229	0.19733	0.31511	1.22(0.83-1.79)	SEHA	426/55/93	347/68/70
Ho_Chi_Minh_City	VietNam	rs1734792	153341060	MECP2	other severe malaria	rec	All	0.0286293	0.107796	0.790557	1.03(0.83-1.27)	SE	382/445/1645	102/54/385
Ibadan	Nigeria	rs1734792	153341060	MECP2	other severe malaria	rec	All	0.412113	0.629007	0.512351	1.51(0.44-5.18)	SEHA	2005-12-22	46/9/9
Kilifi	Kenya	rs1734792	153341060	MECP2	other severe malaria	rec	All	0.0818776	0.10518	0.436302	1.09(0.88-1.33)	SEHA	2304/842/726	579/194/194
Kumasi	Ghana	rs1734792	153341060	MECP2	other severe malaria	rec	All	-0.122429	0.150106	0.41472	0.88(0.66-1.19)	SEHA	1294/380/314	437/98/92
Madang	PapuaNewGuinea	rs1734792	153341060	MECP2	other severe malaria	rec	All	-0.0668689	0.315697	0.832252	0.94(0.5-1.74)	SE	187/27/25	173/14/22
Moshi	Tanzania	rs1734792	153341060	MECP2	other severe malaria	rec	All	0.456137	0.26245	0.0822121	1.58(0.94-2.64)	SEHA	257/112/85	116/30/39
Noguchi	Ghana	rs1734792	153341060	MECP2	other severe malaria	rec	All	0.2669	0.275415	0.332503	1.31(0.76-2.24)	SEHA	118/39/29	243/64/70
Ougadougou	BurkinaFaso	rs1734792	153341060	MECP2	other severe malaria	rec	All	-0.0187655	0.176193	0.915182	0.98(0.69-1.39)	SHA	479/133/99	476/93/104
All	All	rs1734792	153341060	MECP2	other severe malaria	rec	All	0.0686007	0.0487225	0.159134	1.07(0.97-1.18)	SEHA	9693/3065/3832	3550/818/1152
Bamako	Mali	rs1734792	153341060	MECP2	other severe malaria	dom	All	-0.11455	0.262707	0.662809	0.89(0.53-1.49)	SEHA	230/49/48	79/13/15
Banjul	Gambia	rs1734792	153341060	MECP2	other severe malaria	dom	All	-0.0461929	0.0891667	0.604422	0.95(0.8-1.14)	SEHA	2419/476/326	824/136/106
Blantyre	Malawi	rs1734792	153341060	MECP2	other severe malaria	dom	All	0.266864	0.179936	0.138047	1.31(0.92-1.86)	SHA	1575/495/437	128/45/46
Buea	Cameroon	rs1734792	153341060	MECP2	other severe malaria	dom	All	-0.0256885	0.160807	0.87308	0.97(0.71-1.34)	SEHA	426/55/93	347/68/70
Ho_Chi_Minh_City	VietNam	rs1734792	153341060	MECP2	other severe malaria	dom	All	0.0460213	0.127289	0.717689	1.05(0.82-1.34)	SE	382/445/1645	102/54/385
Ibadan	Nigeria	rs1734792	153341060	MECP2	other severe malaria	dom	All	0.00600404	0.501205	0.990442	1.01(0.38-2.69)	SEHA	2005-12-22	46/9/9
Kilifi	Kenya	rs1734792	153341060	MECP2	other severe malaria	dom	All	-0.00342197	0.0851893	0.967958	1(0.84-1.18)	SEHA	2304/842/726	579/194/194
Kumasi	Ghana	rs1734792	153341060	MECP2	other severe malaria	dom	All	-0.228009	0.117707	0.0527352	0.8(0.63-1)	SEHA	1294/380/314	437/98/92
Madang	PapuaNewGuinea	rs1734792	153341060	MECP2	other severe malaria	dom	All	-0.240705	0.246493	0.328806	0.79(0.48-1.27)	SE	187/27/25	173/14/22
Moshi	Tanzania	rs1734792	153341060	MECP2	other severe malaria	dom	All	-0.0670953	0.21192	0.751542	0.94(0.62-1.42)	SEHA	257/112/85	116/30/39
Noguchi	Ghana	rs1734792	153341060	MECP2	other severe malaria	dom	All	-0.0916516	0.212691	0.66653	0.91(0.6-1.38)	SEHA	118/39/29	243/64/70
Ougadougou	BurkinaFaso	rs1734792	153341060	MECP2	other severe malaria	dom	All	-0.227332	0.134094	0.0900165	0.8(0.61-1.04)	SHA	479/133/99	476/93/104
All	All	rs1734792	153341060	MECP2	other severe malaria	dom	All	-0.0606048	0.041132	0.140637	0.94(0.87-1.02)	SEHA	9693/3065/3832	3550/818/1152
Bamako	Mali	rs1734792	153341060	MECP2	other severe malaria	add	F	-0.100883	0.364286	0.781832	0.9(0.44-1.85)	EHA	104/49/7	31/13/1
Banjul	Gambia	rs1734792	153341060	MECP2	other severe malaria	add	F	0.0675435	0.100227	0.50037	1.07(0.88-1.3)	EHA	1090/476/42	342/136/22
Blantyre	Malawi	rs1734792	153341060	MECP2	other severe malaria	add	F	0.440481	0.188084	0.0191842	1.55(1.07-2.25)	HA	620/495/77	48/45/12
Buea	Cameroon	rs1734792	153341060	MECP2	other severe malaria	add	F	-0.183878	0.207895	0.37644	0.83(0.55-1.25)	EHA	97/55/7	143/68/8
Ho_Chi_Minh_City	VietNam	rs1734792	153341060	MECP2	other severe malaria	add	F	0.112258	0.1595	0.481549	1.12(0.82-1.53)	E	54/445/651	4/54/80
Ibadan	Nigeria	rs1734792	153341060	MECP2	other severe malaria	add	F	-0.528947	0.569436	0.352943	0.59(0.19-1.8)	EHA	2002-12-08	2001-09-15
Kilifi	Kenya	rs1734792	153341060	MECP2	other severe malaria	add	F	0.0419689	0.0916018	0.646833	1.04(0.87-1.25)	EHA	928/842/155	231/194/40
Kumasi	Ghana	rs1734792	153341060	MECP2	other severe malaria	add	F	-0.369427	0.131157	0.00485218	0.69(0.53-0.89)	EHA	526/380/75	177/98/14
Madang	PapuaNewGuinea	rs1734792	153341060	MECP2	other severe malaria	add	F	-0.0132579	0.250285	0.957755	0.99(0.6-1.61)	E	80/27/5	63/14/7
Moshi	Tanzania	rs1734792	153341060	MECP2	other severe malaria	add	F	-0.043473	0.22721	0.848264	0.96(0.61-1.49)	EHA	114/112/23	52/30/14
Noguchi	Ghana	rs1734792	153341060	MECP2	other severe malaria	add	F	-0.166765	0.253588	0.510779	0.85(0.51-1.39)	EHA	40/39/5	101/64/12
Ougadougou	BurkinaFaso	rs1734792	153341060	MECP2	other severe malaria	add	F	-0.433319	0.170264	0.0109283	0.65(0.46-0.91)	HA	196/133/15	183/93/9
All	All	rs1734792	153341060	MECP2	other severe malaria	add	F	-0.0444145	0.0462612	0.337015	0.96(0.87-1.05)	EHA	3857/3065/1064	1390/818/220
Bamako	Mali	rs1734792	153341060	MECP2	other severe malaria	rec	F	-0.840469	1.12909	0.45665	0.43(0.05-3.95)	EHA	104/49/7	31/13/1
Banjul	Gambia	rs1734792	153341060	MECP2	other severe malaria	rec	F	0.651675	0.282141	0.0209019	1.92(1.1-3.34)	EHA	1090/476/42	342/136/22
Blantyre	Malawi	rs1734792	153341060	MECP2	other severe malaria	rec	F	0.832537	0.359989	0.0207405	2.3(1.14-4.66)	HA	620/495/77	48/45/12
Buea	Cameroon	rs1734792	153341060	MECP2	other severe malaria	rec	F	0.0299337	0.561808	0.957508	1.03(0.34-3.1)	EHA	97/55/7	143/68/8
Ho_Chi_Minh_City	VietNam	rs1734792	153341060	MECP2	other severe malaria	rec	F	0.0822777	0.184054	0.654854	1.09(0.76-1.56)	E	54/445/651	4/54/80
Ibadan	Nigeria	rs1734792	153341060	MECP2	other severe malaria	rec	F	-0.89259	1.31187	0.496253	0.41(0.03-5.36)	EHA	2002-12-08	2001-09-15
Kilifi	Kenya	rs1734792	153341060	MECP2	other severe malaria	rec	F	0.186	0.19837	0.348426	1.2(0.82-1.78)	EHA	928/842/155	231/194/40
Kumasi	Ghana	rs1734792	153341060	MECP2	other severe malaria	rec	F	-0.501682	0.322444	0.119739	0.61(0.32-1.14)	EHA	526/380/75	177/98/14
Madang	PapuaNewGuinea	rs1734792	153341060	MECP2	other severe malaria	rec	F	0.648866	0.607944	0.285831	1.91(0.58-6.3)	E	80/27/5	63/14/7
Moshi	Tanzania	rs1734792	153341060	MECP2	other severe malaria	rec	F	0.699958	0.422097	0.0972598	2.01(0.88-4.61)	EHA	114/112/23	52/30/14
Noguchi	Ghana	rs1734792	153341060	MECP2	other severe malaria	rec	F	0.37298	0.606289	0.538433	1.45(0.44-4.76)	EHA	40/39/5	101/64/12
Ougadougou	BurkinaFaso	rs1734792	153341060	MECP2	other severe malaria	rec	F	-0.320281	0.458838	0.48516	0.73(0.3-1.78)	HA	196/133/15	183/93/9
All	All	rs1734792	153341060	MECP2	other severe malaria	rec	F	0.175253	0.0972112	0.0714188	1.19(0.98-1.44)	EHA	3857/3065/1064	1390/818/220
Bamako	Mali	rs1734792	153341060	MECP2	other severe malaria	dom	F	0.0113306	0.429384	0.978948	1.01(0.44-2.35)	EHA	104/49/7	31/13/1
Banjul	Gambia	rs1734792	153341060	MECP2	other severe malaria	dom	F	-0.0108105	0.115689	0.925551	0.99(0.79-1.24)	EHA	1090/476/42	342/136/22
Blantyre	Malawi	rs1734792	153341060	MECP2	other severe malaria	dom	F	0.362359	0.237072	0.126394	1.44(0.9-2.29)	HA	620/495/77	48/45/12
Buea	Cameroon	rs1734792	153341060	MECP2	other severe malaria	dom	F	-0.259971	0.244429	0.287517	0.77(0.48-1.24)	EHA	97/55/7	143/68/8
Ho_Chi_Minh_City	VietNam	rs1734792	153341060	MECP2	other severe malaria	dom	F	0.476364	0.528118	0.367056	1.61(0.57-4.53)	E	54/445/651	4/54/80
Ibadan	Nigeria	rs1734792	153341060	MECP2	other severe malaria	dom	F	-0.57578	0.722277	0.42535	0.56(0.14-2.32)	EHA	2002-12-08	2001-09-15
Kilifi	Kenya	rs1734792	153341060	MECP2	other severe malaria	dom	F	0.00545619	0.113985	0.961822	1.01(0.8-1.26)	EHA	928/842/155	231/194/40
Kumasi	Ghana	rs1734792	153341060	MECP2	other severe malaria	dom	F	-0.416569	0.157143	0.00802813	0.66(0.48-0.9)	EHA	526/380/75	177/98/14
Madang	PapuaNewGuinea	rs1734792	153341060	MECP2	other severe malaria	dom	F	-0.220695	0.333578	0.508228	0.8(0.42-1.54)	E	80/27/5	63/14/7
Moshi	Tanzania	rs1734792	153341060	MECP2	other severe malaria	dom	F	-0.398411	0.295253	0.177212	0.67(0.38-1.2)	EHA	114/112/23	52/30/14
Noguchi	Ghana	rs1734792	153341060	MECP2	other severe malaria	dom	F	-0.348986	0.309325	0.259228	0.71(0.38-1.29)	EHA	40/39/5	101/64/12
Ougadougou	BurkinaFaso	rs1734792	153341060	MECP2	other severe malaria	dom	F	-0.498528	0.19147	0.00922268	0.61(0.42-0.88)	HA	196/133/15	183/93/9
All	All	rs1734792	153341060	MECP2	other severe malaria	dom	F	-0.13001	0.0578122	0.0245233	0.88(0.78-0.98)	EHA	3857/3065/1064	1390/818/220
Bamako	Mali	rs1734792	153341060	MECP2	other severe malaria	het	F	0.161062	0.422819	0.703259	1.17(0.51-2.69)	EHA	104/49/7	31/13/1
Banjul	Gambia	rs1734792	153341060	MECP2	other severe malaria	het	F	-0.115765	0.118992	0.330613	0.89(0.71-1.12)	EHA	1090/476/42	342/136/22
Blantyre	Malawi	rs1734792	153341060	MECP2	other severe malaria	het	F	0.0504632	0.223739	0.821555	1.05(0.68-1.63)	HA	620/495/77	48/45/12
Buea	Cameroon	rs1734792	153341060	MECP2	other severe malaria	het	F	-0.265871	0.24444	0.276739	0.77(0.47-1.24)	EHA	97/55/7	143/68/8
Ho_Chi_Minh_City	VietNam	rs1734792	153341060	MECP2	other severe malaria	het	F	-0.0130345	0.18605	0.944146	0.99(0.69-1.42)	E	54/445/651	4/54/80
Ibadan	Nigeria	rs1734792	153341060	MECP2	other severe malaria	het	F	-0.274982	0.712144	0.699399	0.76(0.19-3.07)	EHA	2002-12-08	2001-09-15
Kilifi	Kenya	rs1734792	153341060	MECP2	other severe malaria	het	F	-0.0500971	0.110051	0.648952	0.95(0.77-1.18)	EHA	928/842/155	231/194/40
Kumasi	Ghana	rs1734792	153341060	MECP2	other severe malaria	het	F	-0.271791	0.153236	0.0761168	0.76(0.56-1.03)	EHA	526/380/75	177/98/14
Madang	PapuaNewGuinea	rs1734792	153341060	MECP2	other severe malaria	het	F	-0.502727	0.371288	0.175734	0.6(0.29-1.25)	E	80/27/5	63/14/7
Moshi	Tanzania	rs1734792	153341060	MECP2	other severe malaria	het	F	-0.605302	0.273414	0.0268381	0.55(0.32-0.93)	EHA	114/112/23	52/30/14
Noguchi	Ghana	rs1734792	153341060	MECP2	other severe malaria	het	F	-0.40829	0.29384	0.164682	0.66(0.37-1.18)	EHA	40/39/5	101/64/12
Ougadougou	BurkinaFaso	rs1734792	153341060	MECP2	other severe malaria	het	F	-0.417104	0.185135	0.024261	0.66(0.46-0.95)	HA	196/133/15	183/93/9
All	All	rs1734792	153341060	MECP2	other severe malaria	het	F	-0.171095	0.0549132	0.00183489	0.84(0.76-0.94)	EHA	3857/3065/1064	1390/818/220
Bamako	Mali	rs1734792	153341060	MECP2	other severe malaria	dom	M	-0.0219787	0.384084	0.954367	0.98(0.46-2.08)	EHA	126/0/41	48/0/14
Banjul	Gambia	rs1734792	153341060	MECP2	other severe malaria	dom	M	-0.11494	0.140468	0.413207	0.89(0.68-1.17)	EHA	1329/0/284	482/0/84
Blantyre	Malawi	rs1734792	153341060	MECP2	other severe malaria	dom	M	0.170448	0.264566	0.519409	1.19(0.71-1.99)	HA	955/0/360	80/0/34
Buea	Cameroon	rs1734792	153341060	MECP2	other severe malaria	dom	M	0.223929	0.217491	0.303197	1.25(0.82-1.92)	EHA	329/0/86	204/0/62
Ho_Chi_Minh_City	VietNam	rs1734792	153341060	MECP2	other severe malaria	dom	M	0.00578412	0.133048	0.965324	1.01(0.77-1.31)	E	328/0/994	98/0/305
Ibadan	Nigeria	rs1734792	153341060	MECP2	other severe malaria	dom	M	1.08352	0.966498	0.262253	2.96(0.44-19.65)	EHA	14/0/3	31/0/8
Kilifi	Kenya	rs1734792	153341060	MECP2	other severe malaria	dom	M	0.00974963	0.124323	0.937493	1.01(0.79-1.29)	EHA	1376/0/571	348/0/154
Kumasi	Ghana	rs1734792	153341060	MECP2	other severe malaria	dom	M	0.0279094	0.175361	0.873547	1.03(0.73-1.45)	EHA	768/0/239	260/0/78
Madang	PapuaNewGuinea	rs1734792	153341060	MECP2	other severe malaria	dom	M	-0.341418	0.378519	0.367066	0.71(0.34-1.49)	E	107/0/20	110/0/15
Moshi	Tanzania	rs1734792	153341060	MECP2	other severe malaria	dom	M	0.333017	0.337557	0.323864	1.4(0.72-2.7)	EHA	143/0/62	64/0/25
Noguchi	Ghana	rs1734792	153341060	MECP2	other severe malaria	dom	M	0.212672	0.311091	0.494207	1.24(0.67-2.28)	EHA	78/0/24	142/0/58
Ougadougou	BurkinaFaso	rs1734792	153341060	MECP2	other severe malaria	dom	M	0.0407889	0.193253	0.832837	1.04(0.71-1.52)	HA	283/0/84	293/0/95
All	All	rs1734792	153341060	MECP2	other severe malaria	dom	M	0.0255727	0.0573715	0.655786	1.03(0.92-1.15)	EHA	5836/0/2768	2160/0/932
Bamako	Mali	rs766420	153554404	TKTL1	severe malaria	add	All	-0.0936772	0.0948476	0.323319	0.91(0.76-1.1)	SEHA	82/73/172	125/86/221
Banjul	Gambia	rs766420	153554404	TKTL1	severe malaria	add	All	0.000605254	0.0322391	0.985021	1(0.94-1.07)	SEHA	1147/786/1295	840/611/997
Blantyre	Malawi	rs766420	153554404	TKTL1	severe malaria	add	All	0.0160924	0.0430342	0.708446	1.02(0.93-1.11)	SHA	658/592/1286	350/312/706
Buea	Cameroon	rs766420	153554404	TKTL1	severe malaria	add	All	-0.0939852	0.0727101	0.196149	0.91(0.79-1.05)	SEHA	173/79/321	184/145/289
Ho_Chi_Minh_City	VietNam	rs766420	153554404	TKTL1	severe malaria	add	All	-0.0214074	0.0508691	0.673877	0.98(0.89-1.08)	SE	1582/451/451	533/87/168
Ibadan	Nigeria	rs766420	153554404	TKTL1	severe malaria	add	All	0.389063	0.278469	0.162369	1.48(0.85-2.55)	SEHA	2023-04-10	1949-12-15
Kilifi	Kenya	rs766420	153554404	TKTL1	severe malaria	add	All	-0.0580391	0.0348573	0.0959027	0.94(0.88-1.01)	SEHA	870/818/2206	527/488/1212
Kumasi	Ghana	rs766420	153554404	TKTL1	severe malaria	add	All	-0.0452836	0.0455691	0.320351	0.96(0.87-1.05)	SEHA	472/405/1092	363/304/807
Madang	PapuaNewGuinea	rs766420	153554404	TKTL1	severe malaria	add	All	0.234039	0.166257	0.159222	1.26(0.91-1.75)	SE	14/22/204	17/24/339
Moshi	Tanzania	rs766420	153554404	TKTL1	severe malaria	add	All	-0.110258	0.0892678	0.216779	0.9(0.75-1.07)	SEHA	101/106/247	123/89/213
Noguchi	Ghana	rs766420	153554404	TKTL1	severe malaria	add	All	-0.00829125	0.10584	0.937559	0.99(0.81-1.22)	SEHA	57/34/105	165/127/369
Ougadougou	BurkinaFaso	rs766420	153554404	TKTL1	severe malaria	add	All	-0.106126	0.0645193	0.099995	0.9(0.79-1.02)	SHA	167/159/390	220/179/442
All	All	rs766420	153554404	TKTL1	severe malaria	add	All	-0.0316664	0.0158508	0.0457405	0.97(0.94-1)	SEHA	5333/3529/7792	3462/2464/5812
Bamako	Mali	rs766420	153554404	TKTL1	severe malaria	rec	All	-0.154713	0.165241	0.349125	0.86(0.62-1.18)	SEHA	82/73/172	125/86/221
Banjul	Gambia	rs766420	153554404	TKTL1	severe malaria	rec	All	-0.0333459	0.0593545	0.574246	0.97(0.86-1.09)	SEHA	1147/786/1295	840/611/997
Blantyre	Malawi	rs766420	153554404	TKTL1	severe malaria	rec	All	0.0409324	0.0738126	0.579206	1.04(0.9-1.2)	SHA	658/592/1286	350/312/706
Buea	Cameroon	rs766420	153554404	TKTL1	severe malaria	rec	All	-0.177168	0.132274	0.180442	0.84(0.65-1.09)	SEHA	173/79/321	184/145/289
Ho_Chi_Minh_City	VietNam	rs766420	153554404	TKTL1	severe malaria	rec	All	-0.0702222	0.106122	0.508155	0.93(0.76-1.15)	SE	1582/451/451	533/87/168
Ibadan	Nigeria	rs766420	153554404	TKTL1	severe malaria	rec	All	0.439335	0.486468	0.366466	1.55(0.6-4.03)	SEHA	2023-04-10	1949-12-15
Kilifi	Kenya	rs766420	153554404	TKTL1	severe malaria	rec	All	-0.111761	0.0588938	0.0577405	0.89(0.8-1)	SEHA	870/818/2206	527/488/1212
Kumasi	Ghana	rs766420	153554404	TKTL1	severe malaria	rec	All	-0.104441	0.0779934	0.180539	0.9(0.77-1.05)	SEHA	472/405/1092	363/304/807
Madang	PapuaNewGuinea	rs766420	153554404	TKTL1	severe malaria	rec	All	0.392076	0.25515	0.124379	1.48(0.9-2.44)	SE	14/22/204	17/24/339
Moshi	Tanzania	rs766420	153554404	TKTL1	severe malaria	rec	All	-0.182438	0.152432	0.231364	0.83(0.62-1.12)	SEHA	101/106/247	123/89/213
Noguchi	Ghana	rs766420	153554404	TKTL1	severe malaria	rec	All	-0.0733053	0.185101	0.692084	0.93(0.65-1.34)	SEHA	57/34/105	165/127/369
Ougadougou	BurkinaFaso	rs766420	153554404	TKTL1	severe malaria	rec	All	-0.199866	0.111091	0.0720003	0.82(0.66-1.02)	SHA	167/159/390	220/179/442
All	All	rs766420	153554404	TKTL1	severe malaria	rec	All	-0.076924	0.0281042	0.00619841	0.93(0.88-0.98)	SEHA	5333/3529/7792	3462/2464/5812
Bamako	Mali	rs766420	153554404	TKTL1	severe malaria	dom	All	-0.165042	0.184646	0.371413	0.85(0.59-1.22)	SEHA	82/73/172	125/86/221
Banjul	Gambia	rs766420	153554404	TKTL1	severe malaria	dom	All	0.0365322	0.0603568	0.544999	1.04(0.92-1.17)	SEHA	1147/786/1295	840/611/997
Blantyre	Malawi	rs766420	153554404	TKTL1	severe malaria	dom	All	0.00860313	0.0847262	0.919122	1.01(0.85-1.19)	SHA	658/592/1286	350/312/706
Buea	Cameroon	rs766420	153554404	TKTL1	severe malaria	dom	All	-0.155394	0.141989	0.273777	0.86(0.65-1.13)	SEHA	173/79/321	184/145/289
Ho_Chi_Minh_City	VietNam	rs766420	153554404	TKTL1	severe malaria	dom	All	-0.0154926	0.089591	0.862709	0.98(0.83-1.17)	SE	1582/451/451	533/87/168
Ibadan	Nigeria	rs766420	153554404	TKTL1	severe malaria	dom	All	0.982864	0.554936	0.0765391	2.67(0.9-7.93)	SEHA	2023-04-10	1949-12-15
Kilifi	Kenya	rs766420	153554404	TKTL1	severe malaria	dom	All	-0.0773704	0.0703968	0.271742	0.93(0.81-1.06)	SEHA	870/818/2206	527/488/1212
Kumasi	Ghana	rs766420	153554404	TKTL1	severe malaria	dom	All	-0.0393384	0.0918833	0.668553	0.96(0.8-1.15)	SEHA	472/405/1092	363/304/807
Madang	PapuaNewGuinea	rs766420	153554404	TKTL1	severe malaria	dom	All	0.328409	0.376345	0.382866	1.39(0.66-2.9)	SE	14/22/204	17/24/339
Moshi	Tanzania	rs766420	153554404	TKTL1	severe malaria	dom	All	-0.186981	0.175744	0.287356	0.83(0.59-1.17)	SEHA	101/106/247	123/89/213
Noguchi	Ghana	rs766420	153554404	TKTL1	severe malaria	dom	All	0.0597197	0.204836	0.770631	1.06(0.71-1.59)	SEHA	57/34/105	165/127/369
Ougadougou	BurkinaFaso	rs766420	153554404	TKTL1	severe malaria	dom	All	-0.15474	0.128194	0.227403	0.86(0.67-1.1)	SHA	167/159/390	220/179/442
All	All	rs766420	153554404	TKTL1	severe malaria	dom	All	-0.0265862	0.030436	0.382384	0.97(0.92-1.03)	SEHA	5333/3529/7792	3462/2464/5812
Bamako	Mali	rs766420	153554404	TKTL1	severe malaria	add	F	-0.127252	0.163668	0.436863	0.88(0.64-1.21)	EHA	24/73/63	35/86/69
Banjul	Gambia	rs766420	153554404	TKTL1	severe malaria	add	F	-0.00941732	0.0568184	0.868358	0.99(0.89-1.11)	EHA	388/786/427	267/611/303
Blantyre	Malawi	rs766420	153554404	TKTL1	severe malaria	add	F	0.030059	0.0759466	0.692259	1.03(0.89-1.2)	HA	164/592/454	96/312/258
Buea	Cameroon	rs766420	153554404	TKTL1	severe malaria	add	F	-0.250361	0.159722	0.117002	0.78(0.57-1.06)	EHA	21/79/58	49/145/90
Ho_Chi_Minh_City	VietNam	rs766420	153554404	TKTL1	severe malaria	add	F	0.0673616	0.122621	0.582766	1.07(0.84-1.36)	E	622/451/76	106/87/15
Ibadan	Nigeria	rs766420	153554404	TKTL1	severe malaria	add	F	-0.503156	0.574537	0.381161	0.6(0.2-1.86)	EHA	2015-04-01	2015-12-04
Kilifi	Kenya	rs766420	153554404	TKTL1	severe malaria	add	F	-0.0913074	0.0605695	0.131687	0.91(0.81-1.03)	EHA	218/818/893	132/488/462
Kumasi	Ghana	rs766420	153554404	TKTL1	severe malaria	add	F	-0.159945	0.0799412	0.0454152	0.85(0.73-1)	EHA	115/405/451	89/304/292
Madang	PapuaNewGuinea	rs766420	153554404	TKTL1	severe malaria	add	F	0.460198	0.296515	0.120657	1.58(0.89-2.83)	E	2/22/88	1/24/145
Moshi	Tanzania	rs766420	153554404	TKTL1	severe malaria	add	F	-0.181819	0.151848	0.231162	0.83(0.62-1.12)	EHA	30/106/113	34/89/76
Noguchi	Ghana	rs766420	153554404	TKTL1	severe malaria	add	F	-0.0420197	0.188994	0.824054	0.96(0.66-1.39)	EHA	15/34/39	40/127/121
Ougadougou	BurkinaFaso	rs766420	153554404	TKTL1	severe malaria	add	F	-0.0595876	0.117611	0.6124	0.94(0.75-1.19)	HA	50/159/138	45/179/139
All	All	rs766420	153554404	TKTL1	severe malaria	add	F	-0.0572772	0.0286752	0.0457764	0.94(0.89-1)	EHA	1650/3529/2815	898/2464/1985
Bamako	Mali	rs766420	153554404	TKTL1	severe malaria	rec	F	-0.174932	0.237503	0.461399	0.84(0.53-1.34)	EHA	24/73/63	35/86/69
Banjul	Gambia	rs766420	153554404	TKTL1	severe malaria	rec	F	-0.0893702	0.0910951	0.326561	0.91(0.76-1.09)	EHA	388/786/427	267/611/303
Blantyre	Malawi	rs766420	153554404	TKTL1	severe malaria	rec	F	0.0675784	0.104744	0.518813	1.07(0.87-1.31)	HA	164/592/454	96/312/258
Buea	Cameroon	rs766420	153554404	TKTL1	severe malaria	rec	F	-0.306995	0.223544	0.169656	0.74(0.47-1.14)	EHA	21/79/58	49/145/90
Ho_Chi_Minh_City	VietNam	rs766420	153554404	TKTL1	severe malaria	rec	F	0.0587794	0.296466	0.842836	1.06(0.59-1.9)	E	622/451/76	106/87/15
Ibadan	Nigeria	rs766420	153554404	TKTL1	severe malaria	rec	F	-0.750667	0.742713	0.312156	0.47(0.11-2.02)	EHA	2015-04-01	2015-12-04
Kilifi	Kenya	rs766420	153554404	TKTL1	severe malaria	rec	F	-0.13247	0.0819942	0.106179	0.88(0.75-1.03)	EHA	218/818/893	132/488/462
Kumasi	Ghana	rs766420	153554404	TKTL1	severe malaria	rec	F	-0.22725	0.11042	0.0395852	0.8(0.64-0.99)	EHA	115/405/451	89/304/292
Madang	PapuaNewGuinea	rs766420	153554404	TKTL1	severe malaria	rec	F	0.473633	0.323534	0.143211	1.61(0.85-3.03)	E	2/22/88	1/24/145
Moshi	Tanzania	rs766420	153554404	TKTL1	severe malaria	rec	F	-0.217539	0.213119	0.307377	0.8(0.53-1.22)	EHA	30/106/113	34/89/76
Noguchi	Ghana	rs766420	153554404	TKTL1	severe malaria	rec	F	-0.16901	0.267245	0.527115	0.84(0.5-1.43)	EHA	15/34/39	40/127/121
Ougadougou	BurkinaFaso	rs766420	153554404	TKTL1	severe malaria	rec	F	-0.150405	0.161367	0.351303	0.86(0.63-1.18)	HA	50/159/138	45/179/139
All	All	rs766420	153554404	TKTL1	severe malaria	rec	F	-0.107266	0.0415995	0.00992196	0.9(0.83-0.97)	EHA	1650/3529/2815	898/2464/1985
Bamako	Mali	rs766420	153554404	TKTL1	severe malaria	dom	F	-0.153536	0.304452	0.614048	0.86(0.47-1.56)	EHA	24/73/63	35/86/69
Banjul	Gambia	rs766420	153554404	TKTL1	severe malaria	dom	F	0.0700084	0.0943424	0.458047	1.07(0.89-1.29)	EHA	388/786/427	267/611/303
Blantyre	Malawi	rs766420	153554404	TKTL1	severe malaria	dom	F	-0.0195217	0.144425	0.892479	0.98(0.74-1.3)	HA	164/592/454	96/312/258
Buea	Cameroon	rs766420	153554404	TKTL1	severe malaria	dom	F	-0.333851	0.300292	0.266244	0.72(0.4-1.29)	EHA	21/79/58	49/145/90
Ho_Chi_Minh_City	VietNam	rs766420	153554404	TKTL1	severe malaria	dom	F	0.0890273	0.153359	0.561567	1.09(0.81-1.48)	E	622/451/76	106/87/15
Ibadan	Nigeria	rs766420	153554404	TKTL1	severe malaria	dom	F	-0.342212	1.21903	0.778921	0.71(0.07-7.74)	EHA	2015-04-01	2015-12-04
Kilifi	Kenya	rs766420	153554404	TKTL1	severe malaria	dom	F	-0.0790269	0.124137	0.524379	0.92(0.72-1.18)	EHA	218/818/893	132/488/462
Kumasi	Ghana	rs766420	153554404	TKTL1	severe malaria	dom	F	-0.165075	0.161387	0.306378	0.85(0.62-1.16)	EHA	115/405/451	89/304/292
Madang	PapuaNewGuinea	rs766420	153554404	TKTL1	severe malaria	dom	F	1.05555	1.23268	0.391827	2.87(0.26-32.19)	E	2/22/88	1/24/145
Moshi	Tanzania	rs766420	153554404	TKTL1	severe malaria	dom	F	-0.267981	0.293822	0.361742	0.76(0.43-1.36)	EHA	30/106/113	34/89/76
Noguchi	Ghana	rs766420	153554404	TKTL1	severe malaria	dom	F	0.149222	0.352211	0.671804	1.16(0.58-2.32)	EHA	15/34/39	40/127/121
Ougadougou	BurkinaFaso	rs766420	153554404	TKTL1	severe malaria	dom	F	0.0777757	0.229638	0.734844	1.08(0.69-1.7)	HA	50/159/138	45/179/139
All	All	rs766420	153554404	TKTL1	severe malaria	dom	F	-0.0204556	0.052068	0.694421	0.98(0.88-1.09)	EHA	1650/3529/2815	898/2464/1985
Bamako	Mali	rs766420	153554404	TKTL1	severe malaria	het	F	0.0727303	0.225488	0.747039	1.08(0.69-1.67)	EHA	24/73/63	35/86/69
Banjul	Gambia	rs766420	153554404	TKTL1	severe malaria	het	F	0.118213	0.0795703	0.137374	1.13(0.96-1.32)	EHA	388/786/427	267/611/303
Blantyre	Malawi	rs766420	153554404	TKTL1	severe malaria	het	F	-0.0683622	0.0982693	0.486641	0.93(0.77-1.13)	HA	164/592/454	96/312/258
Buea	Cameroon	rs766420	153554404	TKTL1	severe malaria	het	F	0.0976666	0.20815	0.638918	1.1(0.73-1.66)	EHA	21/79/58	49/145/90
Ho_Chi_Minh_City	VietNam	rs766420	153554404	TKTL1	severe malaria	het	F	0.0747918	0.154445	0.628201	1.08(0.8-1.46)	E	622/451/76	106/87/15
Ibadan	Nigeria	rs766420	153554404	TKTL1	severe malaria	het	F	0.661159	0.779251	0.396185	1.94(0.42-8.92)	EHA	2015-04-01	2015-12-04
Kilifi	Kenya	rs766420	153554404	TKTL1	severe malaria	het	F	0.0941357	0.0801096	0.23996	1.1(0.94-1.29)	EHA	218/818/893	132/488/462
Kumasi	Ghana	rs766420	153554404	TKTL1	severe malaria	het	F	0.146536	0.108426	0.176538	1.16(0.94-1.43)	EHA	115/405/451	89/304/292
Madang	PapuaNewGuinea	rs766420	153554404	TKTL1	severe malaria	het	F	-0.41497	0.33196	0.211278	0.66(0.34-1.27)	E	2/22/88	1/24/145
Moshi	Tanzania	rs766420	153554404	TKTL1	severe malaria	het	F	0.0700912	0.204739	0.732092	1.07(0.72-1.6)	EHA	30/106/113	34/89/76
Noguchi	Ghana	rs766420	153554404	TKTL1	severe malaria	het	F	0.235609	0.25967	0.364227	1.27(0.76-2.11)	EHA	15/34/39	40/127/121
Ougadougou	BurkinaFaso	rs766420	153554404	TKTL1	severe malaria	het	F	0.170664	0.153454	0.266072	1.19(0.88-1.6)	HA	50/159/138	45/179/139
All	All	rs766420	153554404	TKTL1	severe malaria	het	F	0.0801084	0.0382939	0.0364445	1.08(1.01-1.17)	EHA	1650/3529/2815	898/2464/1985
Bamako	Mali	rs766420	153554404	TKTL1	severe malaria	dom	M	-0.147349	0.226441	0.51523	0.86(0.55-1.35)	EHA	58/0/109	90/0/152
Banjul	Gambia	rs766420	153554404	TKTL1	severe malaria	dom	M	0.0122041	0.0790356	0.877285	1.01(0.87-1.18)	EHA	759/0/868	573/0/694
Blantyre	Malawi	rs766420	153554404	TKTL1	severe malaria	dom	M	0.0180091	0.104827	0.863596	1.02(0.83-1.25)	HA	494/0/832	254/0/448
Buea	Cameroon	rs766420	153554404	TKTL1	severe malaria	dom	M	-0.11907	0.163505	0.466471	0.89(0.64-1.22)	EHA	152/0/263	135/0/199
Ho_Chi_Minh_City	VietNam	rs766420	153554404	TKTL1	severe malaria	dom	M	-0.0896668	0.112856	0.426892	0.91(0.73-1.14)	E	960/0/375	427/0/153
Ibadan	Nigeria	rs766420	153554404	TKTL1	severe malaria	dom	M	1.33341	0.698152	0.0561434	3.79(0.97-14.91)	EHA	9/0/8	11/0/34
Kilifi	Kenya	rs766420	153554404	TKTL1	severe malaria	dom	M	-0.0833219	0.0847577	0.325578	0.92(0.78-1.09)	EHA	652/0/1313	395/0/750
Kumasi	Ghana	rs766420	153554404	TKTL1	severe malaria	dom	M	0.0253194	0.111011	0.819584	1.03(0.83-1.27)	EHA	357/0/641	274/0/515
Madang	PapuaNewGuinea	rs766420	153554404	TKTL1	severe malaria	dom	M	0.2559	0.415549	0.538018	1.29(0.57-2.92)	E	12/0/116	16/0/194
Moshi	Tanzania	rs766420	153554404	TKTL1	severe malaria	dom	M	-0.139987	0.221839	0.528022	0.87(0.56-1.34)	EHA	71/0/134	89/0/137
Noguchi	Ghana	rs766420	153554404	TKTL1	severe malaria	dom	M	0.0289343	0.241456	0.904616	1.03(0.64-1.65)	EHA	42/0/66	125/0/248
Ougadougou	BurkinaFaso	rs766420	153554404	TKTL1	severe malaria	dom	M	-0.258362	0.153754	0.0928868	0.77(0.57-1.04)	HA	117/0/252	175/0/303
All	All	rs766420	153554404	TKTL1	severe malaria	dom	M	-0.0414066	0.0378341	0.273769	0.96(0.89-1.03)	EHA	3683/0/4977	2564/0/3827
Bamako	Mali	rs766420	153554404	TKTL1	cerebal malaria	add	All	-0.18442	0.14982	0.218342	0.83(0.62-1.12)	SEHA	82/73/172	29/15/34
Banjul	Gambia	rs766420	153554404	TKTL1	cerebal malaria	add	All	0.0231905	0.0470106	0.621798	1.02(0.93-1.12)	SEHA	1147/786/1295	262/199/335
Blantyre	Malawi	rs766420	153554404	TKTL1	cerebal malaria	add	All	0.0604217	0.0502645	0.229335	1.06(0.96-1.17)	SHA	658/592/1286	220/191/453
Buea	Cameroon	rs766420	153554404	TKTL1	cerebal malaria	add	All	-0.212664	0.196796	0.279863	0.81(0.55-1.19)	SEHA	173/79/321	2016-10-13
Ho_Chi_Minh_City	VietNam	rs766420	153554404	TKTL1	cerebal malaria	add	All	-0.0563186	0.087011	0.517465	0.95(0.8-1.12)	SE	1582/451/451	144/22/42
Ibadan	Nigeria	rs766420	153554404	TKTL1	cerebal malaria	add	All	0.601811	0.555879	0.278973	1.83(0.61-5.43)	SEHA	2023-04-10	2004-01-01
Kilifi	Kenya	rs766420	153554404	TKTL1	cerebal malaria	add	All	-0.00185489	0.0475632	0.968892	1(0.91-1.1)	SEHA	870/818/2206	205/186/503
Kumasi	Ghana	rs766420	153554404	TKTL1	cerebal malaria	add	All	-0.0871685	0.0910246	0.338246	0.92(0.77-1.1)	SEHA	472/405/1092	63/45/119
Madang	PapuaNewGuinea	rs766420	153554404	TKTL1	cerebal malaria	add	All	0.485285	0.57236	0.396512	1.62(0.53-4.99)	SE	14/22/204	2/0/42
Moshi	Tanzania	rs766420	153554404	TKTL1	cerebal malaria	add	All	-0.0484908	0.224312	0.828851	0.95(0.61-1.48)	SEHA	101/106/247	2018-07-09
Noguchi	Ghana	rs766420	153554404	TKTL1	cerebal malaria	add	All	0.264121	0.263826	0.316771	1.3(0.78-2.18)	SEHA	57/34/105	2011-08-02
Ougadougou	BurkinaFaso	rs766420	153554404	TKTL1	cerebal malaria	add	All	-0.113878	0.125326	0.363532	0.89(0.7-1.14)	SHA	167/159/390	25/31/51
All	All	rs766420	153554404	TKTL1	cerebal malaria	add	All	0.00203714	0.0241156	0.93268	1(0.96-1.05)	SEHA	5333/3529/7792	975/715/1628
Bamako	Mali	rs766420	153554404	TKTL1	cerebal malaria	rec	All	-0.353511	0.278206	0.203843	0.7(0.41-1.21)	SEHA	82/73/172	29/15/34
Banjul	Gambia	rs766420	153554404	TKTL1	cerebal malaria	rec	All	0.022764	0.0855644	0.790204	1.02(0.87-1.21)	SEHA	1147/786/1295	262/199/335
Blantyre	Malawi	rs766420	153554404	TKTL1	cerebal malaria	rec	All	0.134195	0.0856096	0.116991	1.14(0.97-1.35)	SHA	658/592/1286	220/191/453
Buea	Cameroon	rs766420	153554404	TKTL1	cerebal malaria	rec	All	-0.366024	0.346676	0.291054	0.69(0.35-1.37)	SEHA	173/79/321	2016-10-13
Ho_Chi_Minh_City	VietNam	rs766420	153554404	TKTL1	cerebal malaria	rec	All	-0.186361	0.183702	0.310355	0.83(0.58-1.19)	SE	1582/451/451	144/22/42
Ibadan	Nigeria	rs766420	153554404	TKTL1	cerebal malaria	rec	All	0.732445	1.03336	0.47845	2.08(0.27-15.77)	SEHA	2023-04-10	2004-01-01
Kilifi	Kenya	rs766420	153554404	TKTL1	cerebal malaria	rec	All	-0.00847903	0.0798523	0.915436	0.99(0.85-1.16)	SEHA	870/818/2206	205/186/503
Kumasi	Ghana	rs766420	153554404	TKTL1	cerebal malaria	rec	All	-0.102923	0.155999	0.509402	0.9(0.66-1.22)	SEHA	472/405/1092	63/45/119
Madang	PapuaNewGuinea	rs766420	153554404	TKTL1	cerebal malaria	rec	All	1.21805	0.835475	0.144865	3.38(0.66-17.38)	SE	14/22/204	2/0/42
Moshi	Tanzania	rs766420	153554404	TKTL1	cerebal malaria	rec	All	-0.0795142	0.380384	0.83442	0.92(0.44-1.95)	SEHA	101/106/247	2018-07-09
Noguchi	Ghana	rs766420	153554404	TKTL1	cerebal malaria	rec	All	0.000740058	0.450315	0.998689	1(0.41-2.42)	SEHA	57/34/105	2011-08-02
Ougadougou	BurkinaFaso	rs766420	153554404	TKTL1	cerebal malaria	rec	All	-0.378495	0.227783	0.0965831	0.68(0.44-1.07)	SHA	167/159/390	25/31/51
All	All	rs766420	153554404	TKTL1	cerebal malaria	rec	All	-0.00646936	0.0425771	0.879231	0.99(0.91-1.08)	SEHA	5333/3529/7792	975/715/1628
Bamako	Mali	rs766420	153554404	TKTL1	cerebal malaria	dom	All	-0.2913	0.288209	0.312149	0.75(0.42-1.31)	SEHA	82/73/172	29/15/34
Banjul	Gambia	rs766420	153554404	TKTL1	cerebal malaria	dom	All	0.0573453	0.0890967	0.519815	1.06(0.89-1.26)	SEHA	1147/786/1295	262/199/335
Blantyre	Malawi	rs766420	153554404	TKTL1	cerebal malaria	dom	All	0.0574233	0.0989903	0.561853	1.06(0.87-1.29)	SHA	658/592/1286	220/191/453
Buea	Cameroon	rs766420	153554404	TKTL1	cerebal malaria	dom	All	-0.365271	0.386765	0.344952	0.69(0.33-1.48)	SEHA	173/79/321	2016-10-13
Ho_Chi_Minh_City	VietNam	rs766420	153554404	TKTL1	cerebal malaria	dom	All	-0.0415231	0.156854	0.791221	0.96(0.71-1.3)	SE	1582/451/451	144/22/42
Ibadan	Nigeria	rs766420	153554404	TKTL1	cerebal malaria	dom	All	1.63534	1.28462	0.203014	5.13(0.41-63.63)	SEHA	2023-04-10	2004-01-01
Kilifi	Kenya	rs766420	153554404	TKTL1	cerebal malaria	dom	All	0.00454957	0.0971921	0.962665	1(0.83-1.22)	SEHA	870/818/2206	205/186/503
Kumasi	Ghana	rs766420	153554404	TKTL1	cerebal malaria	dom	All	-0.209502	0.18172	0.248958	0.81(0.57-1.16)	SEHA	472/405/1092	63/45/119
Madang	PapuaNewGuinea	rs766420	153554404	TKTL1	cerebal malaria	dom	All	-0.0110343	0.793481	0.988905	0.99(0.21-4.68)	SE	14/22/204	2/0/42
Moshi	Tanzania	rs766420	153554404	TKTL1	cerebal malaria	dom	All	-0.0849073	0.446763	0.84927	0.92(0.38-2.21)	SEHA	101/106/247	2018-07-09
Noguchi	Ghana	rs766420	153554404	TKTL1	cerebal malaria	dom	All	1.3069	0.806678	0.105212	3.69(0.76-17.96)	SEHA	57/34/105	2011-08-02
Ougadougou	BurkinaFaso	rs766420	153554404	TKTL1	cerebal malaria	dom	All	0.0456365	0.254958	0.857941	1.05(0.64-1.73)	SHA	167/159/390	25/31/51
All	All	rs766420	153554404	TKTL1	cerebal malaria	dom	All	0.0153765	0.0467605	0.74228	1.02(0.93-1.11)	SEHA	5333/3529/7792	975/715/1628
Bamako	Mali	rs766420	153554404	TKTL1	cerebal malaria	add	F	-0.0548033	0.289932	0.850076	0.95(0.54-1.67)	EHA	24/73/63	6/15/11
Banjul	Gambia	rs766420	153554404	TKTL1	cerebal malaria	add	F	-0.0391245	0.080751	0.628026	0.96(0.82-1.13)	EHA	388/786/427	97/199/100
Blantyre	Malawi	rs766420	153554404	TKTL1	cerebal malaria	add	F	0.0886876	0.0881361	0.314292	1.09(0.92-1.3)	HA	164/592/454	63/191/173
Buea	Cameroon	rs766420	153554404	TKTL1	cerebal malaria	add	F	-0.394794	0.364558	0.278836	0.67(0.33-1.38)	EHA	21/79/58	2005-10-04
Ho_Chi_Minh_City	VietNam	rs766420	153554404	TKTL1	cerebal malaria	add	F	0.12848	0.240488	0.59317	1.14(0.71-1.82)	E	622/451/76	22/22/2
Ibadan	Nigeria	rs766420	153554404	TKTL1	cerebal malaria	add	F	-0.177993	1.23908	0.885778	0.84(0.07-9.49)	EHA	2015-04-01	0/1/1
Kilifi	Kenya	rs766420	153554404	TKTL1	cerebal malaria	add	F	-0.123026	0.0826805	0.136759	0.88(0.75-1.04)	EHA	218/818/893	58/186/194
Kumasi	Ghana	rs766420	153554404	TKTL1	cerebal malaria	add	F	-0.147881	0.158264	0.350099	0.86(0.63-1.18)	EHA	115/405/451	17/45/51
Madang	PapuaNewGuinea	rs766420	153554404	TKTL1	cerebal malaria	add	F	17.8331	1913.89	0.992566	55569543.43(0-Inf)	E	2/22/88	0/0/19
Moshi	Tanzania	rs766420	153554404	TKTL1	cerebal malaria	add	F	0.0909652	0.393184	0.817039	1.1(0.51-2.37)	EHA	30/106/113	2008-07-02
Noguchi	Ghana	rs766420	153554404	TKTL1	cerebal malaria	add	F	-0.410285	0.463154	0.375698	0.66(0.27-1.64)	EHA	15/34/39	2002-08-01
Ougadougou	BurkinaFaso	rs766420	153554404	TKTL1	cerebal malaria	add	F	-0.290096	0.250289	0.246438	0.75(0.46-1.22)	HA	50/159/138	3/31/14
All	All	rs766420	153554404	TKTL1	cerebal malaria	add	F	-0.0491079	0.04334	0.257178	0.95(0.87-1.04)	EHA	1648/3507/2727	273/715/561
Bamako	Mali	rs766420	153554404	TKTL1	cerebal malaria	rec	F	-0.148218	0.439946	0.736192	0.86(0.36-2.04)	EHA	24/73/63	6/15/11
Banjul	Gambia	rs766420	153554404	TKTL1	cerebal malaria	rec	F	-0.0905397	0.13152	0.491196	0.91(0.71-1.18)	EHA	388/786/427	97/199/100
Blantyre	Malawi	rs766420	153554404	TKTL1	cerebal malaria	rec	F	0.176657	0.121001	0.144301	1.19(0.94-1.51)	HA	164/592/454	63/191/173
Buea	Cameroon	rs766420	153554404	TKTL1	cerebal malaria	rec	F	-0.504683	0.5572	0.365069	0.6(0.2-1.8)	EHA	21/79/58	2005-10-04
Ho_Chi_Minh_City	VietNam	rs766420	153554404	TKTL1	cerebal malaria	rec	F	-0.431111	0.736313	0.558211	0.65(0.15-2.75)	E	622/451/76	22/22/2
Ibadan	Nigeria	rs766420	153554404	TKTL1	cerebal malaria	rec	F	-0.80882	1.64693	0.623349	0.45(0.02-11.24)	EHA	2015-04-01	0/1/1
Kilifi	Kenya	rs766420	153554404	TKTL1	cerebal malaria	rec	F	-0.129518	0.112743	0.250641	0.88(0.7-1.1)	EHA	218/818/893	58/186/194
Kumasi	Ghana	rs766420	153554404	TKTL1	cerebal malaria	rec	F	-0.0889058	0.224676	0.692322	0.91(0.59-1.42)	EHA	115/405/451	17/45/51
Madang	PapuaNewGuinea	rs766420	153554404	TKTL1	cerebal malaria	rec	F	18.0348	2054.78	0.992997	67986992.9(0-Inf)	E	2/22/88	0/0/19
Moshi	Tanzania	rs766420	153554404	TKTL1	cerebal malaria	rec	F	0.0496459	0.550843	0.928186	1.05(0.36-3.09)	EHA	30/106/113	2008-07-02
Noguchi	Ghana	rs766420	153554404	TKTL1	cerebal malaria	rec	F	-1.29291	0.82255	0.11599	0.27(0.05-1.38)	EHA	15/34/39	2002-08-01
Ougadougou	BurkinaFaso	rs766420	153554404	TKTL1	cerebal malaria	rec	F	-0.79147	0.361925	0.0287547	0.45(0.22-0.92)	HA	50/159/138	3/31/14
All	All	rs766420	153554404	TKTL1	cerebal malaria	rec	F	-0.0713748	0.0630898	0.25792	0.93(0.82-1.05)	EHA	1648/3507/2727	273/715/561
Bamako	Mali	rs766420	153554404	TKTL1	cerebal malaria	dom	F	0.034788	0.531377	0.947802	1.04(0.37-2.93)	EHA	24/73/63	6/15/11
Banjul	Gambia	rs766420	153554404	TKTL1	cerebal malaria	dom	F	-0.0126266	0.133929	0.924888	0.99(0.76-1.28)	EHA	388/786/427	97/199/100
Blantyre	Malawi	rs766420	153554404	TKTL1	cerebal malaria	dom	F	-0.0147338	0.166892	0.929652	0.99(0.71-1.37)	HA	164/592/454	63/191/173
Buea	Cameroon	rs766420	153554404	TKTL1	cerebal malaria	dom	F	-0.528386	0.628065	0.400184	0.59(0.17-2.02)	EHA	21/79/58	2005-10-04
Ho_Chi_Minh_City	VietNam	rs766420	153554404	TKTL1	cerebal malaria	dom	F	0.286485	0.302731	0.343978	1.33(0.74-2.41)	E	622/451/76	22/22/2
Ibadan	Nigeria	rs766420	153554404	TKTL1	cerebal malaria	dom	F	18.2591	10754	0.998645	85076831.67(0-Inf)	EHA	2015-04-01	0/1/1
Kilifi	Kenya	rs766420	153554404	TKTL1	cerebal malaria	dom	F	-0.219474	0.166332	0.187005	0.8(0.58-1.11)	EHA	218/818/893	58/186/194
Kumasi	Ghana	rs766420	153554404	TKTL1	cerebal malaria	dom	F	-0.387659	0.29609	0.190446	0.68(0.38-1.21)	EHA	115/405/451	17/45/51
Madang	PapuaNewGuinea	rs766420	153554404	TKTL1	cerebal malaria	dom	F	15.5851	2797.44	0.995555	5868249.85(0-Inf)	E	2/22/88	0/0/19
Moshi	Tanzania	rs766420	153554404	TKTL1	cerebal malaria	dom	F	0.274594	0.826341	0.739662	1.32(0.26-6.65)	EHA	30/106/113	2008-07-02
Noguchi	Ghana	rs766420	153554404	TKTL1	cerebal malaria	dom	F	0.602152	1.11556	0.589353	1.83(0.21-16.26)	EHA	15/34/39	2002-08-01
Ougadougou	BurkinaFaso	rs766420	153554404	TKTL1	cerebal malaria	dom	F	0.675084	0.63234	0.285702	1.96(0.57-6.78)	HA	50/159/138	3/31/14
All	All	rs766420	153554404	TKTL1	cerebal malaria	dom	F	-0.0509445	0.0790756	0.519413	0.95(0.81-1.11)	EHA	1648/3507/2727	273/715/561
Bamako	Mali	rs766420	153554404	TKTL1	cerebal malaria	het	F	0.152406	0.411351	0.71101	1.16(0.52-2.61)	EHA	24/73/63	6/15/11
Banjul	Gambia	rs766420	153554404	TKTL1	cerebal malaria	het	F	0.060334	0.11457	0.598463	1.06(0.85-1.33)	EHA	388/786/427	97/199/100
Blantyre	Malawi	rs766420	153554404	TKTL1	cerebal malaria	het	F	-0.163807	0.114622	0.152973	0.85(0.68-1.06)	HA	164/592/454	63/191/173
Buea	Cameroon	rs766420	153554404	TKTL1	cerebal malaria	het	F	0.135127	0.496361	0.785441	1.14(0.43-3.03)	EHA	21/79/58	2005-10-04
Ho_Chi_Minh_City	VietNam	rs766420	153554404	TKTL1	cerebal malaria	het	F	0.378521	0.301937	0.209972	1.46(0.81-2.64)	E	622/451/76	22/22/2
Ibadan	Nigeria	rs766420	153554404	TKTL1	cerebal malaria	het	F	1.27913	1.59447	0.422418	3.59(0.16-81.8)	EHA	2015-04-01	0/1/1
Kilifi	Kenya	rs766420	153554404	TKTL1	cerebal malaria	het	F	0.0319857	0.110701	0.772629	1.03(0.83-1.28)	EHA	218/818/893	58/186/194
Kumasi	Ghana	rs766420	153554404	TKTL1	cerebal malaria	het	F	-0.114751	0.224819	0.609761	0.89(0.57-1.39)	EHA	115/405/451	17/45/51
Madang	PapuaNewGuinea	rs766420	153554404	TKTL1	cerebal malaria	het	F	-18.0355	2133.23	0.993254	0(0-Inf)	E	2/22/88	0/0/19
Moshi	Tanzania	rs766420	153554404	TKTL1	cerebal malaria	het	F	0.0802364	0.54666	0.883309	1.08(0.37-3.16)	EHA	30/106/113	2008-07-02
Noguchi	Ghana	rs766420	153554404	TKTL1	cerebal malaria	het	F	1.39501	0.725191	0.0543988	4.04(0.97-16.72)	EHA	15/34/39	2002-08-01
Ougadougou	BurkinaFaso	rs766420	153554404	TKTL1	cerebal malaria	het	F	0.900215	0.33041	0.00643911	2.46(1.29-4.7)	HA	50/159/138	3/31/14
All	All	rs766420	153554404	TKTL1	cerebal malaria	het	F	0.0340374	0.0585056	0.560715	1.03(0.92-1.16)	EHA	1648/3507/2727	273/715/561
Bamako	Mali	rs766420	153554404	TKTL1	cerebal malaria	dom	M	-0.521063	0.363939	0.152221	0.59(0.29-1.21)	EHA	58/0/109	23/0/23
Banjul	Gambia	rs766420	153554404	TKTL1	cerebal malaria	dom	M	0.100116	0.117978	0.396103	1.11(0.88-1.39)	EHA	759/0/868	165/0/235
Blantyre	Malawi	rs766420	153554404	TKTL1	cerebal malaria	dom	M	0.093496	0.122399	0.444949	1.1(0.86-1.4)	HA	494/0/832	157/0/280
Buea	Cameroon	rs766420	153554404	TKTL1	cerebal malaria	dom	M	-0.349876	0.485602	0.471218	0.7(0.27-1.83)	EHA	152/0/263	9/0/11
Ho_Chi_Minh_City	VietNam	rs766420	153554404	TKTL1	cerebal malaria	dom	M	-0.184268	0.193493	0.340932	0.83(0.57-1.22)	E	960/0/375	122/0/40
Ibadan	Nigeria	rs766420	153554404	TKTL1	cerebal malaria	dom	M	1.60944	1.36626	0.238801	5(0.34-72.77)	HA	9/0/8	1/0/3
Kilifi	Kenya	rs766420	153554404	TKTL1	cerebal malaria	dom	M	0.108767	0.11709	0.352929	1.11(0.89-1.4)	EHA	652/0/1313	147/0/309
Kumasi	Ghana	rs766420	153554404	TKTL1	cerebal malaria	dom	M	-0.122995	0.224271	0.583401	0.88(0.57-1.37)	EHA	357/0/641	46/0/68
Madang	PapuaNewGuinea	rs766420	153554404	TKTL1	cerebal malaria	dom	M	-0.151346	0.825331	0.854503	0.86(0.17-4.33)	E	12/0/116	2/0/23
Moshi	Tanzania	rs766420	153554404	TKTL1	cerebal malaria	dom	M	-0.231269	0.561387	0.680368	0.79(0.26-2.38)	EHA	71/0/134	7/0/10
Noguchi	Ghana	rs766420	153554404	TKTL1	cerebal malaria	dom	M	1.86279	1.08791	0.0868461	6.44(0.76-54.33)	EHA	42/0/66	1/0/9
Ougadougou	BurkinaFaso	rs766420	153554404	TKTL1	cerebal malaria	dom	M	-0.164508	0.302264	0.586268	0.85(0.47-1.53)	HA	117/0/252	22/0/37
All	All	rs766420	153554404	TKTL1	cerebal malaria	dom	M	0.0377222	0.0585735	0.519565	1.04(0.93-1.16)	EHA	3683/0/4977	702/0/1048
Bamako	Mali	rs766420	153554404	TKTL1	severe malaria1 anaemia	add	All	-0.0193277	0.121491	0.8736	0.98(0.77-1.24)	SEHA	82/73/172	44/36/100
Banjul	Gambia	rs766420	153554404	TKTL1	severe malaria1 anaemia	add	All	-0.0266838	0.0585387	0.648512	0.97(0.87-1.09)	SEHA	1147/786/1295	163/112/185
Blantyre	Malawi	rs766420	153554404	TKTL1	severe malaria1 anaemia	add	All	-0.0598794	0.117271	0.609625	0.94(0.75-1.19)	SHA	658/592/1286	32/30/66
Buea	Cameroon	rs766420	153554404	TKTL1	severe malaria1 anaemia	add	All	-0.376132	0.153832	0.0144822	0.69(0.51-0.93)	SEHA	173/79/321	29/18/34
Ho_Chi_Minh_City	VietNam	rs766420	153554404	TKTL1	severe malaria1 anaemia	add	All	0.35636	0.228811	0.119365	1.43(0.91-2.24)	SE	1582/451/451	2009-07-15
Ibadan	Nigeria	rs766420	153554404	TKTL1	severe malaria1 anaemia	add	All	0.588394	0.800284	0.462198	1.8(0.38-8.64)	SEHA	2023-04-10	1/0/6
Kilifi	Kenya	rs766420	153554404	TKTL1	severe malaria1 anaemia	add	All	0.0252571	0.1056	0.810969	1.03(0.83-1.26)	SEHA	870/818/2206	31/33/92
Kumasi	Ghana	rs766420	153554404	TKTL1	severe malaria1 anaemia	add	All	0.06734	0.067476	0.318286	1.07(0.94-1.22)	SEHA	472/405/1092	112/115/318
Madang	PapuaNewGuinea	rs766420	153554404	TKTL1	severe malaria1 anaemia	add	All	0.481939	0.240261	0.0448668	1.62(1.01-2.59)	SE	14/22/204	2/11/103
Moshi	Tanzania	rs766420	153554404	TKTL1	severe malaria1 anaemia	add	All	-0.224685	0.112756	0.0462989	0.8(0.64-1)	SEHA	101/106/247	59/33/87
Noguchi	Ghana	rs766420	153554404	TKTL1	severe malaria1 anaemia	add	All	0.0600767	0.122568	0.624028	1.06(0.84-1.35)	SEHA	57/34/105	56/43/141
Ougadougou	BurkinaFaso	rs766420	153554404	TKTL1	severe malaria1 anaemia	add	All	0.368727	0.261391	0.158352	1.45(0.87-2.41)	SHA	167/159/390	2027-05-06
All	All	rs766420	153554404	TKTL1	severe malaria1 anaemia	add	All	-0.00349001	0.0315142	0.911819	1(0.94-1.06)	SEHA	5333/3529/7792	550/443/1168
Bamako	Mali	rs766420	153554404	TKTL1	severe malaria1 anaemia	rec	All	-0.0683214	0.2114	0.746555	0.93(0.62-1.41)	SEHA	82/73/172	44/36/100
Banjul	Gambia	rs766420	153554404	TKTL1	severe malaria1 anaemia	rec	All	-0.0718877	0.10881	0.508822	0.93(0.75-1.15)	SEHA	1147/786/1295	163/112/185
Blantyre	Malawi	rs766420	153554404	TKTL1	severe malaria1 anaemia	rec	All	-0.0749396	0.195253	0.701122	0.93(0.63-1.36)	SHA	658/592/1286	32/30/66
Buea	Cameroon	rs766420	153554404	TKTL1	severe malaria1 anaemia	rec	All	-0.542782	0.273872	0.0474929	0.58(0.34-0.99)	SEHA	173/79/321	29/18/34
Ho_Chi_Minh_City	VietNam	rs766420	153554404	TKTL1	severe malaria1 anaemia	rec	All	0.739087	0.45246	0.102366	2.09(0.86-5.08)	SE	1582/451/451	2009-07-15
Ibadan	Nigeria	rs766420	153554404	TKTL1	severe malaria1 anaemia	rec	All	1.23533	1.37525	0.369047	3.44(0.23-50.95)	SEHA	2023-04-10	1/0/6
Kilifi	Kenya	rs766420	153554404	TKTL1	severe malaria1 anaemia	rec	All	0.00761374	0.178599	0.965996	1.01(0.71-1.43)	SEHA	870/818/2206	31/33/92
Kumasi	Ghana	rs766420	153554404	TKTL1	severe malaria1 anaemia	rec	All	0.0409716	0.112962	0.716828	1.04(0.83-1.3)	SEHA	472/405/1092	112/115/318
Madang	PapuaNewGuinea	rs766420	153554404	TKTL1	severe malaria1 anaemia	rec	All	0.512228	0.363733	0.159056	1.67(0.82-3.4)	SE	14/22/204	2/11/103
Moshi	Tanzania	rs766420	153554404	TKTL1	severe malaria1 anaemia	rec	All	-0.366093	0.196704	0.0627257	0.69(0.47-1.02)	SEHA	101/106/247	59/33/87
Noguchi	Ghana	rs766420	153554404	TKTL1	severe malaria1 anaemia	rec	All	0.0318305	0.213298	0.881372	1.03(0.68-1.57)	SEHA	57/34/105	56/43/141
Ougadougou	BurkinaFaso	rs766420	153554404	TKTL1	severe malaria1 anaemia	rec	All	0.734137	0.395986	0.0637469	2.08(0.96-4.53)	SHA	167/159/390	2027-05-06
All	All	rs766420	153554404	TKTL1	severe malaria1 anaemia	rec	All	-0.0262235	0.0550054	0.633544	0.97(0.87-1.09)	SEHA	5333/3529/7792	550/443/1168
Bamako	Mali	rs766420	153554404	TKTL1	severe malaria1 anaemia	dom	All	0.0116967	0.239565	0.961059	1.01(0.63-1.62)	SEHA	82/73/172	44/36/100
Banjul	Gambia	rs766420	153554404	TKTL1	severe malaria1 anaemia	dom	All	-0.0194322	0.10959	0.859259	0.98(0.79-1.22)	SEHA	1147/786/1295	163/112/185
Blantyre	Malawi	rs766420	153554404	TKTL1	severe malaria1 anaemia	dom	All	-0.130175	0.235038	0.579683	0.88(0.55-1.39)	SHA	658/592/1286	32/30/66
Buea	Cameroon	rs766420	153554404	TKTL1	severe malaria1 anaemia	dom	All	-0.743114	0.29305	0.0112192	0.48(0.27-0.84)	SEHA	173/79/321	29/18/34
Ho_Chi_Minh_City	VietNam	rs766420	153554404	TKTL1	severe malaria1 anaemia	dom	All	0.486781	0.378984	0.198989	1.63(0.77-3.42)	SE	1582/451/451	2009-07-15
Ibadan	Nigeria	rs766420	153554404	TKTL1	severe malaria1 anaemia	dom	All	0.895358	1.72676	0.604096	2.45(0.08-72.22)	SEHA	2023-04-10	1/0/6
Kilifi	Kenya	rs766420	153554404	TKTL1	severe malaria1 anaemia	dom	All	0.0949248	0.219052	0.664766	1.1(0.72-1.69)	SEHA	870/818/2206	31/33/92
Kumasi	Ghana	rs766420	153554404	TKTL1	severe malaria1 anaemia	dom	All	0.220955	0.142821	0.121846	1.25(0.94-1.65)	SEHA	472/405/1092	112/115/318
Madang	PapuaNewGuinea	rs766420	153554404	TKTL1	severe malaria1 anaemia	dom	All	1.39022	0.59399	0.0192592	4.02(1.25-12.86)	SE	14/22/204	2/11/103
Moshi	Tanzania	rs766420	153554404	TKTL1	severe malaria1 anaemia	dom	All	-0.408276	0.224674	0.0691868	0.66(0.43-1.03)	SEHA	101/106/247	59/33/87
Noguchi	Ghana	rs766420	153554404	TKTL1	severe malaria1 anaemia	dom	All	0.200086	0.246846	0.417612	1.22(0.75-1.98)	SEHA	57/34/105	56/43/141
Ougadougou	BurkinaFaso	rs766420	153554404	TKTL1	severe malaria1 anaemia	dom	All	0.359002	0.467902	0.442928	1.43(0.57-3.58)	SHA	167/159/390	2027-05-06
All	All	rs766420	153554404	TKTL1	severe malaria1 anaemia	dom	All	0.0197139	0.0624391	0.752207	1.02(0.9-1.15)	SEHA	5333/3529/7792	550/443/1168
Bamako	Mali	rs766420	153554404	TKTL1	severe malaria1 anaemia	add	F	-0.052269	0.211038	0.804385	0.95(0.63-1.44)	EHA	24/73/63	12/36/30
Banjul	Gambia	rs766420	153554404	TKTL1	severe malaria1 anaemia	add	F	0.0442005	0.10405	0.670982	1.05(0.85-1.28)	EHA	388/786/427	47/112/60
Blantyre	Malawi	rs766420	153554404	TKTL1	severe malaria1 anaemia	add	F	-0.194993	0.201733	0.333749	0.82(0.55-1.22)	HA	164/592/454	11/30/23
Buea	Cameroon	rs766420	153554404	TKTL1	severe malaria1 anaemia	add	F	-0.141395	0.283063	0.617416	0.87(0.5-1.51)	EHA	21/79/58	7/18/15
Ho_Chi_Minh_City	VietNam	rs766420	153554404	TKTL1	severe malaria1 anaemia	add	F	0.458701	0.37647	0.223062	1.58(0.76-3.31)	E	622/451/76	2003-07-07
Ibadan	Nigeria	rs766420	153554404	TKTL1	severe malaria1 anaemia	add	F	-1.54364	1.27239	0.225061	0.21(0.02-2.59)	EHA	2015-04-01	1/0/3
Kilifi	Kenya	rs766420	153554404	TKTL1	severe malaria1 anaemia	add	F	0.11644	0.189951	0.539877	1.12(0.77-1.63)	EHA	218/818/893	6/33/33
Kumasi	Ghana	rs766420	153554404	TKTL1	severe malaria1 anaemia	add	F	-0.152855	0.117261	0.192389	0.86(0.68-1.08)	EHA	115/405/451	29/115/112
Madang	PapuaNewGuinea	rs766420	153554404	TKTL1	severe malaria1 anaemia	add	F	0.3093	0.39922	0.438481	1.36(0.62-2.98)	E	2/22/88	0/11/51
Moshi	Tanzania	rs766420	153554404	TKTL1	severe malaria1 anaemia	add	F	-0.126997	0.207356	0.540233	0.88(0.59-1.32)	EHA	30/106/113	12/33/27
Noguchi	Ghana	rs766420	153554404	TKTL1	severe malaria1 anaemia	add	F	0.0417647	0.233519	0.858056	1.04(0.66-1.65)	EHA	15/34/39	9/43/39
Ougadougou	BurkinaFaso	rs766420	153554404	TKTL1	severe malaria1 anaemia	add	F	0.618701	0.398801	0.120805	1.86(0.85-4.06)	HA	50/159/138	2013-05-02
All	All	rs766420	153554404	TKTL1	severe malaria1 anaemia	add	F	-0.0198529	0.0561342	0.723587	0.98(0.88-1.09)	EHA	1650/3529/2815	143/443/409
Bamako	Mali	rs766420	153554404	TKTL1	severe malaria1 anaemia	rec	F	-0.12879	0.30427	0.672094	0.88(0.48-1.6)	EHA	24/73/63	12/36/30
Banjul	Gambia	rs766420	153554404	TKTL1	severe malaria1 anaemia	rec	F	-0.00895402	0.166506	0.957114	0.99(0.72-1.37)	EHA	388/786/427	47/112/60
Blantyre	Malawi	rs766420	153554404	TKTL1	severe malaria1 anaemia	rec	F	-0.161817	0.280328	0.563776	0.85(0.49-1.47)	HA	164/592/454	11/30/23
Buea	Cameroon	rs766420	153554404	TKTL1	severe malaria1 anaemia	rec	F	-0.0736882	0.389354	0.849891	0.93(0.43-1.99)	EHA	21/79/58	7/18/15
Ho_Chi_Minh_City	VietNam	rs766420	153554404	TKTL1	severe malaria1 anaemia	rec	F	0.99659	0.67373	0.139084	2.71(0.72-10.15)	E	622/451/76	2003-07-07
Ibadan	Nigeria	rs766420	153554404	TKTL1	severe malaria1 anaemia	rec	F	-1.17492	1.68156	0.484734	0.31(0.01-8.34)	EHA	2015-04-01	1/0/3
Kilifi	Kenya	rs766420	153554404	TKTL1	severe malaria1 anaemia	rec	F	0.0771101	0.250316	0.758044	1.08(0.66-1.76)	EHA	218/818/893	6/33/33
Kumasi	Ghana	rs766420	153554404	TKTL1	severe malaria1 anaemia	rec	F	-0.252576	0.161713	0.118318	0.78(0.57-1.07)	EHA	115/405/451	29/115/112
Madang	PapuaNewGuinea	rs766420	153554404	TKTL1	severe malaria1 anaemia	rec	F	0.241116	0.428403	0.573554	1.27(0.55-2.95)	E	2/22/88	0/11/51
Moshi	Tanzania	rs766420	153554404	TKTL1	severe malaria1 anaemia	rec	F	-0.195235	0.293202	0.505493	0.82(0.46-1.46)	EHA	30/106/113	12/33/27
Noguchi	Ghana	rs766420	153554404	TKTL1	severe malaria1 anaemia	rec	F	-0.100237	0.323097	0.756379	0.9(0.48-1.7)	EHA	15/34/39	9/43/39
Ougadougou	BurkinaFaso	rs766420	153554404	TKTL1	severe malaria1 anaemia	rec	F	0.938504	0.501909	0.0615021	2.56(0.96-6.84)	HA	50/159/138	2013-05-02
All	All	rs766420	153554404	TKTL1	severe malaria1 anaemia	rec	F	-0.0627509	0.0803898	0.435048	0.94(0.8-1.1)	EHA	1650/3529/2815	143/443/409
Bamako	Mali	rs766420	153554404	TKTL1	severe malaria1 anaemia	dom	F	0.0360487	0.400122	0.928212	1.04(0.47-2.27)	EHA	24/73/63	12/36/30
Banjul	Gambia	rs766420	153554404	TKTL1	severe malaria1 anaemia	dom	F	0.136543	0.178347	0.443913	1.15(0.81-1.63)	EHA	388/786/427	47/112/60
Blantyre	Malawi	rs766420	153554404	TKTL1	severe malaria1 anaemia	dom	F	-0.376123	0.358346	0.293899	0.69(0.34-1.39)	HA	164/592/454	11/30/23
Buea	Cameroon	rs766420	153554404	TKTL1	severe malaria1 anaemia	dom	F	-0.374848	0.527091	0.476983	0.69(0.24-1.93)	EHA	21/79/58	7/18/15
Ho_Chi_Minh_City	VietNam	rs766420	153554404	TKTL1	severe malaria1 anaemia	dom	F	0.360812	0.510281	0.479514	1.43(0.53-3.9)	E	622/451/76	2003-07-07
Ibadan	Nigeria	rs766420	153554404	TKTL1	severe malaria1 anaemia	dom	F	-3.80624	2.5022	0.128221	0.02(0-3)	EHA	2015-04-01	1/0/3
Kilifi	Kenya	rs766420	153554404	TKTL1	severe malaria1 anaemia	dom	F	0.349924	0.43949	0.425914	1.42(0.6-3.36)	EHA	218/818/893	6/33/33
Kumasi	Ghana	rs766420	153554404	TKTL1	severe malaria1 anaemia	dom	F	-0.0745443	0.243295	0.759305	0.93(0.58-1.5)	EHA	115/405/451	29/115/112
Madang	PapuaNewGuinea	rs766420	153554404	TKTL1	severe malaria1 anaemia	dom	F	16.9503	2797.44	0.995165	22983979.23(0-Inf)	E	2/22/88	0/11/51
Moshi	Tanzania	rs766420	153554404	TKTL1	severe malaria1 anaemia	dom	F	-0.108834	0.404149	0.787705	0.9(0.41-1.98)	EHA	30/106/113	12/33/27
Noguchi	Ghana	rs766420	153554404	TKTL1	severe malaria1 anaemia	dom	F	0.38941	0.478958	0.416197	1.48(0.58-3.77)	EHA	15/34/39	9/43/39
Ougadougou	BurkinaFaso	rs766420	153554404	TKTL1	severe malaria1 anaemia	dom	F	0.251642	0.785012	0.748545	1.29(0.28-5.99)	HA	50/159/138	2013-05-02
All	All	rs766420	153554404	TKTL1	severe malaria1 anaemia	dom	F	0.0389534	0.106509	0.714568	1.04(0.84-1.28)	EHA	1650/3529/2815	143/443/409
Bamako	Mali	rs766420	153554404	TKTL1	severe malaria1 anaemia	het	F	0.135108	0.288226	0.639242	1.14(0.65-2.01)	EHA	24/73/63	12/36/30
Banjul	Gambia	rs766420	153554404	TKTL1	severe malaria1 anaemia	het	F	0.102533	0.147224	0.486154	1.11(0.83-1.48)	EHA	388/786/427	47/112/60
Blantyre	Malawi	rs766420	153554404	TKTL1	severe malaria1 anaemia	het	F	-0.0387035	0.25912	0.881265	0.96(0.58-1.6)	HA	164/592/454	11/30/23
Buea	Cameroon	rs766420	153554404	TKTL1	severe malaria1 anaemia	het	F	-0.107418	0.371134	0.772252	0.9(0.43-1.86)	EHA	21/79/58	7/18/15
Ho_Chi_Minh_City	VietNam	rs766420	153554404	TKTL1	severe malaria1 anaemia	het	F	-0.0612244	0.505385	0.903577	0.94(0.35-2.53)	E	622/451/76	2003-07-07
Ibadan	Nigeria	rs766420	153554404	TKTL1	severe malaria1 anaemia	het	F	-16.7325	3762.08	0.996451	0(0-Inf)	EHA	2015-04-01	1/0/3
Kilifi	Kenya	rs766420	153554404	TKTL1	severe malaria1 anaemia	het	F	0.0507181	0.247051	0.837343	1.05(0.65-1.71)	EHA	218/818/893	6/33/33
Kumasi	Ghana	rs766420	153554404	TKTL1	severe malaria1 anaemia	het	F	0.21366	0.157766	0.175646	1.24(0.91-1.69)	EHA	115/405/451	29/115/112
Madang	PapuaNewGuinea	rs766420	153554404	TKTL1	severe malaria1 anaemia	het	F	-0.121732	0.434348	0.779275	0.89(0.38-2.07)	E	2/22/88	0/11/51
Moshi	Tanzania	rs766420	153554404	TKTL1	severe malaria1 anaemia	het	F	0.130706	0.282795	0.643943	1.14(0.65-1.98)	EHA	30/106/113	12/33/27
Noguchi	Ghana	rs766420	153554404	TKTL1	severe malaria1 anaemia	het	F	0.27452	0.319923	0.390848	1.32(0.7-2.46)	EHA	15/34/39	9/43/39
Ougadougou	BurkinaFaso	rs766420	153554404	TKTL1	severe malaria1 anaemia	het	F	-0.850858	0.533025	0.110426	0.43(0.15-1.21)	HA	50/159/138	2013-05-02
All	All	rs766420	153554404	TKTL1	severe malaria1 anaemia	het	F	0.075677	0.0756183	0.316935	1.08(0.93-1.25)	EHA	1650/3529/2815	143/443/409
Bamako	Mali	rs766420	153554404	TKTL1	severe malaria1 anaemia	dom	M	0.0478751	0.292276	0.869888	1.05(0.59-1.86)	EHA	58/0/109	32/0/70
Banjul	Gambia	rs766420	153554404	TKTL1	severe malaria1 anaemia	dom	M	-0.138105	0.142414	0.332175	0.87(0.66-1.15)	EHA	759/0/868	116/0/125
Blantyre	Malawi	rs766420	153554404	TKTL1	severe malaria1 anaemia	dom	M	0.0246641	0.297773	0.933988	1.02(0.57-1.84)	HA	494/0/832	21/0/43
Buea	Cameroon	rs766420	153554404	TKTL1	severe malaria1 anaemia	dom	M	-1.00257	0.406052	0.0135463	0.37(0.17-0.81)	EHA	152/0/263	22/0/19
Ho_Chi_Minh_City	VietNam	rs766420	153554404	TKTL1	severe malaria1 anaemia	dom	M	0.653007	0.544649	0.230548	1.92(0.66-5.59)	E	960/0/375	8/0/6
Ibadan	Nigeria	rs766420	153554404	TKTL1	severe malaria1 anaemia	dom	M	18.662	3573.69	0.995833	127291465.09(0-Inf)	HA	9/0/8	0/0/3
Kilifi	Kenya	rs766420	153554404	TKTL1	severe malaria1 anaemia	dom	M	-0.0291987	0.261718	0.911168	0.97(0.58-1.62)	EHA	652/0/1313	25/0/59
Kumasi	Ghana	rs766420	153554404	TKTL1	severe malaria1 anaemia	dom	M	0.360135	0.169917	0.0340501	1.43(1.03-2)	EHA	357/0/641	83/0/206
Madang	PapuaNewGuinea	rs766420	153554404	TKTL1	severe malaria1 anaemia	dom	M	1.50158	0.940638	0.110412	4.49(0.71-28.37)	E	12/0/116	2/0/52
Moshi	Tanzania	rs766420	153554404	TKTL1	severe malaria1 anaemia	dom	M	-0.589748	0.282831	0.0370546	0.55(0.32-0.97)	EHA	71/0/134	47/0/60
Noguchi	Ghana	rs766420	153554404	TKTL1	severe malaria1 anaemia	dom	M	0.131333	0.284875	0.644785	1.14(0.65-1.99)	EHA	42/0/66	47/0/102
Ougadougou	BurkinaFaso	rs766420	153554404	TKTL1	severe malaria1 anaemia	dom	M	0.411937	0.588916	0.48425	1.51(0.48-4.79)	HA	117/0/252	4/0/14
All	All	rs766420	153554404	TKTL1	severe malaria1 anaemia	dom	M	0.00307849	0.0777332	0.968409	1(0.86-1.17)	EHA	3674/0/4969	407/0/756
Bamako	Mali	rs766420	153554404	TKTL1	cerebral malaria and severe malaria1 anaemia	add	All	-0.0858562	0.183842	0.640492	0.92(0.64-1.32)	SEHA	82/73/172	17/15/36
Banjul	Gambia	rs766420	153554404	TKTL1	cerebral malaria and severe malaria1 anaemia	add	All	-0.0862234	0.099748	0.387361	0.92(0.75-1.12)	SEHA	1147/786/1295	47/39/49
Blantyre	Malawi	rs766420	153554404	TKTL1	cerebral malaria and severe malaria1 anaemia	add	All	-0.06645	0.10488	0.526353	0.94(0.76-1.15)	SHA	658/592/1286	38/38/81
Buea	Cameroon	rs766420	153554404	TKTL1	cerebral malaria and severe malaria1 anaemia	add	All	0.161976	0.391024	0.678702	1.18(0.55-2.53)	SEHA	173/79/321	2004-03-01
Ho_Chi_Minh_City	VietNam	rs766420	153554404	TKTL1	cerebral malaria and severe malaria1 anaemia	add	All	-0.355997	0.506729	0.482343	0.7(0.26-1.89)	SE	1582/451/451	2000-03-05
Ibadan	Nigeria	rs766420	153554404	TKTL1	cerebral malaria and severe malaria1 anaemia	add	All	4.05845e-15	0.234941	1	1(0.63-1.58)	SEHA	2023-04-10	0/0/0
Kilifi	Kenya	rs766420	153554404	TKTL1	cerebral malaria and severe malaria1 anaemia	add	All	-0.182395	0.0881533	0.0385398	0.83(0.7-0.99)	SEHA	870/818/2206	58/46/105
Kumasi	Ghana	rs766420	153554404	TKTL1	cerebral malaria and severe malaria1 anaemia	add	All	0.169392	0.145898	0.245629	1.18(0.89-1.58)	SEHA	472/405/1092	13/17/46
Madang	PapuaNewGuinea	rs766420	153554404	TKTL1	cerebral malaria and severe malaria1 anaemia	add	All	-1.14662	0.502279	0.0224403	0.32(0.12-0.85)	SE	14/22/204	2006-01-02
Moshi	Tanzania	rs766420	153554404	TKTL1	cerebral malaria and severe malaria1 anaemia	add	All	-0.0746587	0.255304	0.769957	0.93(0.56-1.53)	SEHA	101/106/247	2014-08-06
Noguchi	Ghana	rs766420	153554404	TKTL1	cerebral malaria and severe malaria1 anaemia	add	All	0.0979958	0.325999	0.763719	1.1(0.58-2.09)	SEHA	57/34/105	2008-03-03
Ougadougou	BurkinaFaso	rs766420	153554404	TKTL1	cerebral malaria and severe malaria1 anaemia	add	All	-0.366055	0.255731	0.152314	0.69(0.42-1.14)	SHA	167/159/390	2009-04-07
All	All	rs766420	153554404	TKTL1	cerebral malaria and severe malaria1 anaemia	add	All	-0.0929212	0.0471724	0.0488589	0.91(0.83-1)	SEHA	5333/3529/7792	197/177/358
Bamako	Mali	rs766420	153554404	TKTL1	cerebral malaria and severe malaria1 anaemia	rec	All	-0.122952	0.310006	0.691654	0.88(0.48-1.62)	SEHA	82/73/172	17/15/36
Banjul	Gambia	rs766420	153554404	TKTL1	cerebral malaria and severe malaria1 anaemia	rec	All	-0.294734	0.191931	0.124631	0.74(0.51-1.08)	SEHA	1147/786/1295	47/39/49
Blantyre	Malawi	rs766420	153554404	TKTL1	cerebral malaria and severe malaria1 anaemia	rec	All	-0.172075	0.18807	0.360219	0.84(0.58-1.22)	SHA	658/592/1286	38/38/81
Buea	Cameroon	rs766420	153554404	TKTL1	cerebral malaria and severe malaria1 anaemia	rec	All	-0.0652517	0.687897	0.924429	0.94(0.24-3.61)	SEHA	173/79/321	2004-03-01
Ho_Chi_Minh_City	VietNam	rs766420	153554404	TKTL1	cerebral malaria and severe malaria1 anaemia	rec	All	-16.172	0.50506	5.76326e-225	0(0-0)	SE	1582/451/451	2000-03-05
Ibadan	Nigeria	rs766420	153554404	TKTL1	cerebral malaria and severe malaria1 anaemia	rec	All	1.27471e-14	0.404801	1	1(0.45-2.21)	SEHA	2023-04-10	0/0/0
Kilifi	Kenya	rs766420	153554404	TKTL1	cerebral malaria and severe malaria1 anaemia	rec	All	-0.279282	0.146817	0.0571385	0.76(0.57-1.01)	SEHA	870/818/2206	58/46/105
Kumasi	Ghana	rs766420	153554404	TKTL1	cerebral malaria and severe malaria1 anaemia	rec	All	0.101829	0.25607	0.690881	1.11(0.67-1.83)	SEHA	472/405/1092	13/17/46
Madang	PapuaNewGuinea	rs766420	153554404	TKTL1	cerebral malaria and severe malaria1 anaemia	rec	All	-1.4136	0.935901	0.130938	0.24(0.04-1.52)	SE	14/22/204	2006-01-02
Moshi	Tanzania	rs766420	153554404	TKTL1	cerebral malaria and severe malaria1 anaemia	rec	All	-0.263629	0.406224	0.516355	0.77(0.35-1.7)	SEHA	101/106/247	2014-08-06
Noguchi	Ghana	rs766420	153554404	TKTL1	cerebral malaria and severe malaria1 anaemia	rec	All	0.106532	0.562562	0.849803	1.11(0.37-3.35)	SEHA	57/34/105	2008-03-03
Ougadougou	BurkinaFaso	rs766420	153554404	TKTL1	cerebral malaria and severe malaria1 anaemia	rec	All	-0.580805	0.498401	0.243882	0.56(0.21-1.49)	SHA	167/159/390	2009-04-07
All	All	rs766420	153554404	TKTL1	cerebral malaria and severe malaria1 anaemia	rec	All	-0.216536	0.0825286	0.00869642	0.81(0.69-0.95)	SEHA	5333/3529/7792	197/177/358
Bamako	Mali	rs766420	153554404	TKTL1	cerebral malaria and severe malaria1 anaemia	dom	All	-0.167358	0.359904	0.641926	0.85(0.42-1.71)	SEHA	82/73/172	17/15/36
Banjul	Gambia	rs766420	153554404	TKTL1	cerebral malaria and severe malaria1 anaemia	dom	All	-0.00318171	0.191033	0.986712	1(0.69-1.45)	SEHA	1147/786/1295	47/39/49
Blantyre	Malawi	rs766420	153554404	TKTL1	cerebral malaria and severe malaria1 anaemia	dom	All	-0.032001	0.203656	0.875141	0.97(0.65-1.44)	SHA	658/592/1286	38/38/81
Buea	Cameroon	rs766420	153554404	TKTL1	cerebral malaria and severe malaria1 anaemia	dom	All	0.874498	1.03525	0.398267	2.4(0.32-18.24)	SEHA	173/79/321	2004-03-01
Ho_Chi_Minh_City	VietNam	rs766420	153554404	TKTL1	cerebral malaria and severe malaria1 anaemia	dom	All	-0.200142	0.721485	0.78147	0.82(0.2-3.37)	SE	1582/451/451	2000-03-05
Ibadan	Nigeria	rs766420	153554404	TKTL1	cerebral malaria and severe malaria1 anaemia	dom	All	9.80848e-15	0.48886	1	1(0.38-2.61)	SEHA	2023-04-10	0/0/0
Kilifi	Kenya	rs766420	153554404	TKTL1	cerebral malaria and severe malaria1 anaemia	dom	All	-0.340991	0.179841	0.0579505	0.71(0.5-1.01)	SEHA	870/818/2206	58/46/105
Kumasi	Ghana	rs766420	153554404	TKTL1	cerebral malaria and severe malaria1 anaemia	dom	All	0.591082	0.337246	0.0796579	1.81(0.93-3.5)	SEHA	472/405/1092	13/17/46
Madang	PapuaNewGuinea	rs766420	153554404	TKTL1	cerebral malaria and severe malaria1 anaemia	dom	All	-2.55976	0.969179	0.0082622	0.08(0.01-0.52)	SE	14/22/204	2006-01-02
Moshi	Tanzania	rs766420	153554404	TKTL1	cerebral malaria and severe malaria1 anaemia	dom	All	0.0786294	0.575783	0.891378	1.08(0.35-3.34)	SEHA	101/106/247	2014-08-06
Noguchi	Ghana	rs766420	153554404	TKTL1	cerebral malaria and severe malaria1 anaemia	dom	All	0.25219	0.702024	0.719421	1.29(0.33-5.09)	SEHA	57/34/105	2008-03-03
Ougadougou	BurkinaFaso	rs766420	153554404	TKTL1	cerebral malaria and severe malaria1 anaemia	dom	All	-0.687087	0.464124	0.138768	0.5(0.2-1.25)	SHA	167/159/390	2009-04-07
All	All	rs766420	153554404	TKTL1	cerebral malaria and severe malaria1 anaemia	dom	All	-0.0828849	0.0949699	0.3828	0.92(0.76-1.11)	SEHA	5333/3529/7792	197/177/358
Bamako	Mali	rs766420	153554404	TKTL1	cerebral malaria and severe malaria1 anaemia	add	F	-0.160703	0.306466	0.600018	0.85(0.47-1.55)	EHA	24/73/63	6/15/14
Banjul	Gambia	rs766420	153554404	TKTL1	cerebral malaria and severe malaria1 anaemia	add	F	-0.142267	0.184949	0.441763	0.87(0.6-1.25)	EHA	388/786/427	13/39/12
Blantyre	Malawi	rs766420	153554404	TKTL1	cerebral malaria and severe malaria1 anaemia	add	F	0.0878753	0.193984	0.650547	1.09(0.75-1.6)	HA	164/592/454	6/38/26
Buea	Cameroon	rs766420	153554404	TKTL1	cerebral malaria and severe malaria1 anaemia	add	F	0.04628	0.761512	0.951539	1.05(0.24-4.66)	EHA	21/79/58	0/3/1
Ho_Chi_Minh_City	VietNam	rs766420	153554404	TKTL1	cerebral malaria and severe malaria1 anaemia	add	F	-0.214826	0.65774	0.743961	0.81(0.22-2.93)	E	622/451/76	2000-03-04
Ibadan	Nigeria	rs766420	153554404	TKTL1	cerebral malaria and severe malaria1 anaemia	add	F	-2.29915e-15	98830.3	1	1(0-Inf)	EHA	2015-04-01	0/0/0
Kilifi	Kenya	rs766420	153554404	TKTL1	cerebral malaria and severe malaria1 anaemia	add	F	-0.427247	0.149795	0.00434158	0.65(0.49-0.87)	EHA	218/818/893	22/46/37
Kumasi	Ghana	rs766420	153554404	TKTL1	cerebral malaria and severe malaria1 anaemia	add	F	-0.333553	0.321703	0.299812	0.72(0.38-1.35)	EHA	115/405/451	2/17/7
Madang	PapuaNewGuinea	rs766420	153554404	TKTL1	cerebral malaria and severe malaria1 anaemia	add	F	0.0762808	1.19128	0.948944	1.08(0.1-11.15)	E	2/22/88	0/1/4
Moshi	Tanzania	rs766420	153554404	TKTL1	cerebral malaria and severe malaria1 anaemia	add	F	-0.510268	0.405576	0.208343	0.6(0.27-1.33)	EHA	30/106/113	2004-08-03
Noguchi	Ghana	rs766420	153554404	TKTL1	cerebral malaria and severe malaria1 anaemia	add	F	0.175272	0.601653	0.770809	1.19(0.37-3.87)	EHA	15/34/39	2003-03-01
Ougadougou	BurkinaFaso	rs766420	153554404	TKTL1	cerebral malaria and severe malaria1 anaemia	add	F	0.0378695	0.537018	0.943781	1.04(0.36-2.98)	HA	50/159/138	2004-04-01
All	All	rs766420	153554404	TKTL1	cerebral malaria and severe malaria1 anaemia	add	F	-0.201628	0.0849061	0.0175622	0.82(0.69-0.97)	EHA	1650/3529/2815	58/177/112
Bamako	Mali	rs766420	153554404	TKTL1	cerebral malaria and severe malaria1 anaemia	rec	F	-0.137735	0.431287	0.749455	0.87(0.37-2.03)	EHA	24/73/63	6/15/14
Banjul	Gambia	rs766420	153554404	TKTL1	cerebral malaria and severe malaria1 anaemia	rec	F	-0.574763	0.339513	0.0904736	0.56(0.29-1.09)	EHA	388/786/427	13/39/12
Blantyre	Malawi	rs766420	153554404	TKTL1	cerebral malaria and severe malaria1 anaemia	rec	F	-0.05713	0.264039	0.8287	0.94(0.56-1.58)	HA	164/592/454	6/38/26
Buea	Cameroon	rs766420	153554404	TKTL1	cerebral malaria and severe malaria1 anaemia	rec	F	-0.584024	1.17661	0.619639	0.56(0.06-5.6)	EHA	21/79/58	0/3/1
Ho_Chi_Minh_City	VietNam	rs766420	153554404	TKTL1	cerebral malaria and severe malaria1 anaemia	rec	F	-15.4039	1991.17	0.993828	0(0-Inf)	E	622/451/76	2000-03-04
Ibadan	Nigeria	rs766420	153554404	TKTL1	cerebral malaria and severe malaria1 anaemia	rec	F	9.88785e-15	130081	1	1(0-Inf)	EHA	2015-04-01	0/0/0
Kilifi	Kenya	rs766420	153554404	TKTL1	cerebral malaria and severe malaria1 anaemia	rec	F	-0.442821	0.217727	0.0419688	0.64(0.42-0.98)	EHA	218/818/893	22/46/37
Kumasi	Ghana	rs766420	153554404	TKTL1	cerebral malaria and severe malaria1 anaemia	rec	F	-0.811272	0.496881	0.102526	0.44(0.17-1.18)	EHA	115/405/451	2/17/7
Madang	PapuaNewGuinea	rs766420	153554404	TKTL1	cerebral malaria and severe malaria1 anaemia	rec	F	0.017585	1.26709	0.988927	1.02(0.08-12.2)	E	2/22/88	0/1/4
Moshi	Tanzania	rs766420	153554404	TKTL1	cerebral malaria and severe malaria1 anaemia	rec	F	-0.84622	0.64629	0.190416	0.43(0.12-1.52)	EHA	30/106/113	2004-08-03
Noguchi	Ghana	rs766420	153554404	TKTL1	cerebral malaria and severe malaria1 anaemia	rec	F	0.0107542	0.872212	0.990163	1.01(0.18-5.59)	EHA	15/34/39	2003-03-01
Ougadougou	BurkinaFaso	rs766420	153554404	TKTL1	cerebral malaria and severe malaria1 anaemia	rec	F	0.0099149	0.724396	0.98908	1.01(0.24-4.18)	HA	50/159/138	2004-04-01
All	All	rs766420	153554404	TKTL1	cerebral malaria and severe malaria1 anaemia	rec	F	-0.361617	0.126639	0.00429698	0.7(0.54-0.89)	EHA	1650/3529/2815	58/177/112
Bamako	Mali	rs766420	153554404	TKTL1	cerebral malaria and severe malaria1 anaemia	dom	F	-0.320413	0.566476	0.571649	0.73(0.24-2.2)	EHA	24/73/63	6/15/14
Banjul	Gambia	rs766420	153554404	TKTL1	cerebral malaria and severe malaria1 anaemia	dom	F	0.165719	0.32146	0.606191	1.18(0.63-2.22)	EHA	388/786/427	13/39/12
Blantyre	Malawi	rs766420	153554404	TKTL1	cerebral malaria and severe malaria1 anaemia	dom	F	0.524177	0.444164	0.237943	1.69(0.71-4.03)	HA	164/592/454	6/38/26
Buea	Cameroon	rs766420	153554404	TKTL1	cerebral malaria and severe malaria1 anaemia	dom	F	18.0002	5973.86	0.997596	65675778.71(0-Inf)	EHA	21/79/58	0/3/1
Ho_Chi_Minh_City	VietNam	rs766420	153554404	TKTL1	cerebral malaria and severe malaria1 anaemia	dom	F	-0.059551	0.766208	0.938049	0.94(0.21-4.23)	E	622/451/76	2000-03-04
Ibadan	Nigeria	rs766420	153554404	TKTL1	cerebral malaria and severe malaria1 anaemia	dom	F	-1.43883e-15	236387	1	1(0-Inf)	EHA	2015-04-01	0/0/0
Kilifi	Kenya	rs766420	153554404	TKTL1	cerebral malaria and severe malaria1 anaemia	dom	F	-0.727225	0.26383	0.00584393	0.48(0.29-0.81)	EHA	218/818/893	22/46/37
Kumasi	Ghana	rs766420	153554404	TKTL1	cerebral malaria and severe malaria1 anaemia	dom	F	0.295446	0.763558	0.698806	1.34(0.3-6)	EHA	115/405/451	2/17/7
Madang	PapuaNewGuinea	rs766420	153554404	TKTL1	cerebral malaria and severe malaria1 anaemia	dom	F	14.7933	4612.2	0.997441	2658592.92(0-Inf)	E	2/22/88	0/1/4
Moshi	Tanzania	rs766420	153554404	TKTL1	cerebral malaria and severe malaria1 anaemia	dom	F	-0.446192	0.714883	0.532531	0.64(0.16-2.6)	EHA	30/106/113	2004-08-03
Noguchi	Ghana	rs766420	153554404	TKTL1	cerebral malaria and severe malaria1 anaemia	dom	F	0.665319	1.2646	0.598812	1.95(0.16-23.19)	EHA	15/34/39	2003-03-01
Ougadougou	BurkinaFaso	rs766420	153554404	TKTL1	cerebral malaria and severe malaria1 anaemia	dom	F	0.132812	1.1079	0.90458	1.14(0.13-10.02)	HA	50/159/138	2004-04-01
All	All	rs766420	153554404	TKTL1	cerebral malaria and severe malaria1 anaemia	dom	F	-0.106203	0.157436	0.499944	0.9(0.66-1.22)	EHA	1650/3529/2815	58/177/112
Bamako	Mali	rs766420	153554404	TKTL1	cerebral malaria and severe malaria1 anaemia	het	F	-0.0353576	0.406396	0.930669	0.97(0.44-2.14)	EHA	24/73/63	6/15/14
Banjul	Gambia	rs766420	153554404	TKTL1	cerebral malaria and severe malaria1 anaemia	het	F	0.514181	0.266448	0.0536368	1.67(0.99-2.82)	EHA	388/786/427	13/39/12
Blantyre	Malawi	rs766420	153554404	TKTL1	cerebral malaria and severe malaria1 anaemia	het	F	0.244962	0.24824	0.323744	1.28(0.79-2.08)	HA	164/592/454	6/38/26
Buea	Cameroon	rs766420	153554404	TKTL1	cerebral malaria and severe malaria1 anaemia	het	F	1.18254	1.17795	0.315428	3.26(0.32-32.83)	EHA	21/79/58	0/3/1
Ho_Chi_Minh_City	VietNam	rs766420	153554404	TKTL1	cerebral malaria and severe malaria1 anaemia	het	F	0.192236	0.766318	0.801925	1.21(0.27-5.44)	E	622/451/76	2000-03-04
Ibadan	Nigeria	rs766420	153554404	TKTL1	cerebral malaria and severe malaria1 anaemia	het	F	-6.53446e-16	139202	1	1(0-Inf)	EHA	2015-04-01	0/0/0
Kilifi	Kenya	rs766420	153554404	TKTL1	cerebral malaria and severe malaria1 anaemia	het	F	0.0350437	0.206125	0.865001	1.04(0.69-1.55)	EHA	218/818/893	22/46/37
Kumasi	Ghana	rs766420	153554404	TKTL1	cerebral malaria and severe malaria1 anaemia	het	F	0.850314	0.455956	0.0621951	2.34(0.96-5.72)	EHA	115/405/451	2/17/7
Madang	PapuaNewGuinea	rs766420	153554404	TKTL1	cerebral malaria and severe malaria1 anaemia	het	F	0.0542035	1.27571	0.966109	1.06(0.09-12.87)	E	2/22/88	0/1/4
Moshi	Tanzania	rs766420	153554404	TKTL1	cerebral malaria and severe malaria1 anaemia	het	F	0.460369	0.555796	0.407497	1.58(0.53-4.71)	EHA	30/106/113	2004-08-03
Noguchi	Ghana	rs766420	153554404	TKTL1	cerebral malaria and severe malaria1 anaemia	het	F	0.325913	0.828775	0.694138	1.39(0.27-7.03)	EHA	15/34/39	2003-03-01
Ougadougou	BurkinaFaso	rs766420	153554404	TKTL1	cerebral malaria and severe malaria1 anaemia	het	F	0.0449149	0.690687	0.948151	1.05(0.27-4.05)	HA	50/159/138	2004-04-01
All	All	rs766420	153554404	TKTL1	cerebral malaria and severe malaria1 anaemia	het	F	0.254297	0.114413	0.0262412	1.29(1.03-1.61)	EHA	1650/3529/2815	58/177/112
Bamako	Mali	rs766420	153554404	TKTL1	cerebral malaria and severe malaria1 anaemia	dom	M	-0.238278	0.458635	0.603387	0.79(0.32-1.94)	EHA	58/0/109	11/0/22
Banjul	Gambia	rs766420	153554404	TKTL1	cerebral malaria and severe malaria1 anaemia	dom	M	-0.10808	0.254217	0.670729	0.9(0.55-1.48)	EHA	759/0/868	34/0/37
Blantyre	Malawi	rs766420	153554404	TKTL1	cerebral malaria and severe malaria1 anaemia	dom	M	-0.284246	0.260447	0.275107	0.75(0.45-1.25)	HA	494/0/832	32/0/55
Buea	Cameroon	rs766420	153554404	TKTL1	cerebral malaria and severe malaria1 anaemia	dom	M	0.342274	1.2334	0.781392	1.41(0.13-15.79)	EHA	152/0/263	1/0/3
Ho_Chi_Minh_City	VietNam	rs766420	153554404	TKTL1	cerebral malaria and severe malaria1 anaemia	dom	M	-16.644	4051.22	0.996722	0(0-Inf)	E	960/0/375	1/0/0
Ibadan	Nigeria	rs766420	153554404	TKTL1	cerebral malaria and severe malaria1 anaemia	dom	M	7.07345e-15	120591	1	1(0-Inf)	HA	9/0/8	0/0/0
Kilifi	Kenya	rs766420	153554404	TKTL1	cerebral malaria and severe malaria1 anaemia	dom	M	-0.0846821	0.227588	0.709829	0.92(0.59-1.44)	EHA	652/0/1313	36/0/68
Kumasi	Ghana	rs766420	153554404	TKTL1	cerebral malaria and severe malaria1 anaemia	dom	M	0.639601	0.37791	0.0905569	1.9(0.9-3.98)	EHA	357/0/641	11/0/39
Madang	PapuaNewGuinea	rs766420	153554404	TKTL1	cerebral malaria and severe malaria1 anaemia	dom	M	-2.98456	1.27371	0.0191194	0.05(0-0.61)	E	12/0/116	2/0/2
Moshi	Tanzania	rs766420	153554404	TKTL1	cerebral malaria and severe malaria1 anaemia	dom	M	0.462699	0.736233	0.529697	1.59(0.38-6.72)	EHA	71/0/134	3/0/10
Noguchi	Ghana	rs766420	153554404	TKTL1	cerebral malaria and severe malaria1 anaemia	dom	M	-0.00859645	0.993572	0.993097	0.99(0.14-6.95)	EHA	42/0/66	2/0/5
Ougadougou	BurkinaFaso	rs766420	153554404	TKTL1	cerebral malaria and severe malaria1 anaemia	dom	M	-1.05118	0.639496	0.100226	0.35(0.1-1.22)	HA	117/0/252	6/0/5
All	All	rs766420	153554404	TKTL1	cerebral malaria and severe malaria1 anaemia	dom	M	-0.0762744	0.119769	0.524224	0.93(0.73-1.17)	EHA	2723/0/4602	138/0/246
Bamako	Mali	rs766420	153554404	TKTL1	other severe malaria	add	All	-0.149171	0.137799	0.279019	0.86(0.66-1.13)	SEHA	82/73/172	35/20/51
Banjul	Gambia	rs766420	153554404	TKTL1	other severe malaria	add	All	-0.00278166	0.0417802	0.946917	1(0.92-1.08)	SEHA	1147/786/1295	368/261/428
Blantyre	Malawi	rs766420	153554404	TKTL1	other severe malaria	add	All	-0.0635918	0.0878044	0.468916	0.94(0.79-1.11)	SHA	658/592/1286	60/53/106
Buea	Cameroon	rs766420	153554404	TKTL1	other severe malaria	add	All	-0.0528394	0.0765874	0.490242	0.95(0.82-1.1)	SEHA	173/79/321	141/114/235
Ho_Chi_Minh_City	VietNam	rs766420	153554404	TKTL1	other severe malaria	add	All	-0.0282827	0.0587856	0.630434	0.97(0.87-1.09)	SE	1582/451/451	369/55/117
Ibadan	Nigeria	rs766420	153554404	TKTL1	other severe malaria	add	All	0.299446	0.295803	0.311386	1.35(0.76-2.41)	SEHA	2023-04-10	1939-11-13
Kilifi	Kenya	rs766420	153554404	TKTL1	other severe malaria	add	All	-0.0813216	0.0458611	0.0761927	0.92(0.84-1.01)	SEHA	870/818/2206	233/223/512
Kumasi	Ghana	rs766420	153554404	TKTL1	other severe malaria	add	All	-0.12688	0.058869	0.0311381	0.88(0.78-0.99)	SEHA	472/405/1092	175/127/324
Madang	PapuaNewGuinea	rs766420	153554404	TKTL1	other severe malaria	add	All	0.204021	0.190477	0.284122	1.23(0.84-1.78)	SE	14/22/204	11/12/188
Moshi	Tanzania	rs766420	153554404	TKTL1	other severe malaria	add	All	-0.0400865	0.112434	0.72144	0.96(0.77-1.2)	SEHA	101/106/247	49/41/94
Noguchi	Ghana	rs766420	153554404	TKTL1	other severe malaria	add	All	-0.0522781	0.113699	0.645664	0.95(0.76-1.19)	SEHA	57/34/105	104/73/209
Ougadougou	BurkinaFaso	rs766420	153554404	TKTL1	other severe malaria	add	All	-0.116384	0.0674426	0.0844061	0.89(0.78-1.02)	SHA	167/159/390	182/139/355
All	All	rs766420	153554404	TKTL1	other severe malaria	add	All	-0.056565	0.0205834	0.00599427	0.95(0.91-0.98)	SEHA	5333/3529/7792	1740/1129/2658
Bamako	Mali	rs766420	153554404	TKTL1	other severe malaria	rec	All	-0.239222	0.247881	0.334511	0.79(0.48-1.28)	SEHA	82/73/172	35/20/51
Banjul	Gambia	rs766420	153554404	TKTL1	other severe malaria	rec	All	-0.0394982	0.0770478	0.608199	0.96(0.83-1.12)	SEHA	1147/786/1295	368/261/428
Blantyre	Malawi	rs766420	153554404	TKTL1	other severe malaria	rec	All	-0.123532	0.151841	0.415896	0.88(0.66-1.19)	SHA	658/592/1286	60/53/106
Buea	Cameroon	rs766420	153554404	TKTL1	other severe malaria	rec	All	-0.116297	0.138955	0.402629	0.89(0.68-1.17)	SEHA	173/79/321	141/114/235
Ho_Chi_Minh_City	VietNam	rs766420	153554404	TKTL1	other severe malaria	rec	All	-0.0633506	0.121951	0.603428	0.94(0.74-1.19)	SE	1582/451/451	369/55/117
Ibadan	Nigeria	rs766420	153554404	TKTL1	other severe malaria	rec	All	0.224	0.51129	0.661308	1.25(0.46-3.41)	SEHA	2023-04-10	1939-11-13
Kilifi	Kenya	rs766420	153554404	TKTL1	other severe malaria	rec	All	-0.171742	0.0783875	0.0284569	0.84(0.72-0.98)	SEHA	870/818/2206	233/223/512
Kumasi	Ghana	rs766420	153554404	TKTL1	other severe malaria	rec	All	-0.221929	0.101855	0.0293409	0.8(0.66-0.98)	SEHA	472/405/1092	175/127/324
Madang	PapuaNewGuinea	rs766420	153554404	TKTL1	other severe malaria	rec	All	0.371817	0.295119	0.207709	1.45(0.81-2.59)	SE	14/22/204	11/12/188
Moshi	Tanzania	rs766420	153554404	TKTL1	other severe malaria	rec	All	-0.0772778	0.191002	0.685779	0.93(0.64-1.35)	SEHA	101/106/247	49/41/94
Noguchi	Ghana	rs766420	153554404	TKTL1	other severe malaria	rec	All	-0.105384	0.198762	0.595972	0.9(0.61-1.33)	SEHA	57/34/105	104/73/209
Ougadougou	BurkinaFaso	rs766420	153554404	TKTL1	other severe malaria	rec	All	-0.209733	0.117414	0.074055	0.81(0.64-1.02)	SHA	167/159/390	182/139/355
All	All	rs766420	153554404	TKTL1	other severe malaria	rec	All	-0.127686	0.0369584	0.000550587	0.88(0.82-0.95)	SEHA	5333/3529/7792	1740/1129/2658
Bamako	Mali	rs766420	153554404	TKTL1	other severe malaria	dom	All	-0.278733	0.26448	0.291934	0.76(0.45-1.27)	SEHA	82/73/172	35/20/51
Banjul	Gambia	rs766420	153554404	TKTL1	other severe malaria	dom	All	0.0312564	0.0787491	0.691433	1.03(0.88-1.2)	SEHA	1147/786/1295	368/261/428
Blantyre	Malawi	rs766420	153554404	TKTL1	other severe malaria	dom	All	-0.0861876	0.174316	0.621	0.92(0.65-1.29)	SHA	658/592/1286	60/53/106
Buea	Cameroon	rs766420	153554404	TKTL1	other severe malaria	dom	All	-0.0674321	0.149921	0.652867	0.93(0.7-1.25)	SEHA	173/79/321	141/114/235
Ho_Chi_Minh_City	VietNam	rs766420	153554404	TKTL1	other severe malaria	dom	All	-0.0424491	0.104267	0.683922	0.96(0.78-1.18)	SE	1582/451/451	369/55/117
Ibadan	Nigeria	rs766420	153554404	TKTL1	other severe malaria	dom	All	0.913378	0.603511	0.130167	2.49(0.76-8.14)	SEHA	2023-04-10	1939-11-13
Kilifi	Kenya	rs766420	153554404	TKTL1	other severe malaria	dom	All	-0.0884239	0.0929999	0.341708	0.92(0.76-1.1)	SEHA	870/818/2206	233/223/512
Kumasi	Ghana	rs766420	153554404	TKTL1	other severe malaria	dom	All	-0.210081	0.117479	0.0737368	0.81(0.64-1.02)	SEHA	472/405/1092	175/127/324
Madang	PapuaNewGuinea	rs766420	153554404	TKTL1	other severe malaria	dom	All	0.242277	0.419867	0.563917	1.27(0.56-2.9)	SE	14/22/204	11/12/188
Moshi	Tanzania	rs766420	153554404	TKTL1	other severe malaria	dom	All	-0.0534551	0.224896	0.812123	0.95(0.61-1.47)	SEHA	101/106/247	49/41/94
Noguchi	Ghana	rs766420	153554404	TKTL1	other severe malaria	dom	All	-0.0706547	0.222754	0.751102	0.93(0.6-1.44)	SEHA	57/34/105	104/73/209
Ougadougou	BurkinaFaso	rs766420	153554404	TKTL1	other severe malaria	dom	All	-0.184485	0.133098	0.16572	0.83(0.64-1.08)	SHA	167/159/390	182/139/355
All	All	rs766420	153554404	TKTL1	other severe malaria	dom	All	-0.0615054	0.0393789	0.118315	0.94(0.87-1.02)	SEHA	5333/3529/7792	1740/1129/2658
Bamako	Mali	rs766420	153554404	TKTL1	other severe malaria	add	F	-0.295765	0.261396	0.257852	0.74(0.45-1.24)	EHA	24/73/63	11/20/14
Banjul	Gambia	rs766420	153554404	TKTL1	other severe malaria	add	F	-0.00331377	0.0749168	0.964719	1(0.86-1.15)	EHA	388/786/427	110/261/131
Blantyre	Malawi	rs766420	153554404	TKTL1	other severe malaria	add	F	-0.114028	0.158322	0.471383	0.89(0.65-1.22)	HA	164/592/454	16/53/36
Buea	Cameroon	rs766420	153554404	TKTL1	other severe malaria	add	F	-0.254248	0.166914	0.1277	0.78(0.56-1.08)	EHA	21/79/58	38/114/69
Ho_Chi_Minh_City	VietNam	rs766420	153554404	TKTL1	other severe malaria	add	F	0.00699481	0.148138	0.962339	1.01(0.75-1.35)	E	622/451/76	73/55/10
Ibadan	Nigeria	rs766420	153554404	TKTL1	other severe malaria	add	F	-0.566796	0.609921	0.352737	0.57(0.17-1.88)	EHA	2015-04-01	2011-11-03
Kilifi	Kenya	rs766420	153554404	TKTL1	other severe malaria	add	F	-0.0201277	0.0818117	0.805663	0.98(0.83-1.15)	EHA	218/818/893	46/223/198
Kumasi	Ghana	rs766420	153554404	TKTL1	other severe malaria	add	F	-0.157507	0.103688	0.128752	0.85(0.7-1.05)	EHA	115/405/451	41/127/122
Madang	PapuaNewGuinea	rs766420	153554404	TKTL1	other severe malaria	add	F	0.398121	0.34765	0.252137	1.49(0.75-2.94)	E	2/22/88	1971-12-01
Moshi	Tanzania	rs766420	153554404	TKTL1	other severe malaria	add	F	-0.234141	0.191196	0.220722	0.79(0.54-1.15)	EHA	30/106/113	17/41/37
Noguchi	Ghana	rs766420	153554404	TKTL1	other severe malaria	add	F	-0.0404517	0.198518	0.838535	0.96(0.65-1.42)	EHA	15/34/39	29/73/77
Ougadougou	BurkinaFaso	rs766420	153554404	TKTL1	other severe malaria	add	F	-0.0738508	0.123868	0.551039	0.93(0.73-1.18)	HA	50/159/138	39/139/108
All	All	rs766420	153554404	TKTL1	other severe malaria	add	F	-0.0676519	0.038097	0.0757695	0.93(0.87-1.01)	EHA	1650/3529/2815	424/1129/884
Bamako	Mali	rs766420	153554404	TKTL1	other severe malaria	rec	F	-0.279221	0.395802	0.480526	0.76(0.35-1.64)	EHA	24/73/63	11/20/14
Banjul	Gambia	rs766420	153554404	TKTL1	other severe malaria	rec	F	-0.0810609	0.119989	0.499315	0.92(0.73-1.17)	EHA	388/786/427	110/261/131
Blantyre	Malawi	rs766420	153554404	TKTL1	other severe malaria	rec	F	-0.16652	0.224425	0.458095	0.85(0.55-1.31)	HA	164/592/454	16/53/36
Buea	Cameroon	rs766420	153554404	TKTL1	other severe malaria	rec	F	-0.341879	0.234234	0.14441	0.71(0.45-1.12)	EHA	21/79/58	38/114/69
Ho_Chi_Minh_City	VietNam	rs766420	153554404	TKTL1	other severe malaria	rec	F	0.0549877	0.354261	0.876649	1.06(0.53-2.12)	E	622/451/76	73/55/10
Ibadan	Nigeria	rs766420	153554404	TKTL1	other severe malaria	rec	F	-0.886114	0.768039	0.248609	0.41(0.09-1.86)	EHA	2015-04-01	2011-11-03
Kilifi	Kenya	rs766420	153554404	TKTL1	other severe malaria	rec	F	-0.113768	0.109976	0.30091	0.89(0.72-1.11)	EHA	218/818/893	46/223/198
Kumasi	Ghana	rs766420	153554404	TKTL1	other severe malaria	rec	F	-0.219407	0.144917	0.130021	0.8(0.6-1.07)	EHA	115/405/451	41/127/122
Madang	PapuaNewGuinea	rs766420	153554404	TKTL1	other severe malaria	rec	F	0.46012	0.385781	0.232988	1.58(0.74-3.37)	E	2/22/88	1971-12-01
Moshi	Tanzania	rs766420	153554404	TKTL1	other severe malaria	rec	F	-0.267646	0.272472	0.325959	0.77(0.45-1.31)	EHA	30/106/113	17/41/37
Noguchi	Ghana	rs766420	153554404	TKTL1	other severe malaria	rec	F	-0.0808801	0.288121	0.778929	0.92(0.52-1.62)	EHA	15/34/39	29/73/77
Ougadougou	BurkinaFaso	rs766420	153554404	TKTL1	other severe malaria	rec	F	-0.14601	0.172152	0.396355	0.86(0.62-1.21)	HA	50/159/138	39/139/108
All	All	rs766420	153554404	TKTL1	other severe malaria	rec	F	-0.138465	0.055836	0.013144	0.87(0.78-0.97)	EHA	1650/3529/2815	424/1129/884
Bamako	Mali	rs766420	153554404	TKTL1	other severe malaria	dom	F	-0.518113	0.443144	0.242333	0.6(0.25-1.42)	EHA	24/73/63	11/20/14
Banjul	Gambia	rs766420	153554404	TKTL1	other severe malaria	dom	F	0.0807442	0.126568	0.523504	1.08(0.85-1.39)	EHA	388/786/427	110/261/131
Blantyre	Malawi	rs766420	153554404	TKTL1	other severe malaria	dom	F	-0.103089	0.294108	0.725952	0.9(0.51-1.61)	HA	164/592/454	16/53/36
Buea	Cameroon	rs766420	153554404	TKTL1	other severe malaria	dom	F	-0.287647	0.31206	0.35665	0.75(0.41-1.38)	EHA	21/79/58	38/114/69
Ho_Chi_Minh_City	VietNam	rs766420	153554404	TKTL1	other severe malaria	dom	F	-0.00380412	0.184099	0.983514	1(0.69-1.43)	E	622/451/76	73/55/10
Ibadan	Nigeria	rs766420	153554404	TKTL1	other severe malaria	dom	F	-0.161245	1.26747	0.898768	0.85(0.07-10.21)	EHA	2015-04-01	2011-11-03
Kilifi	Kenya	rs766420	153554404	TKTL1	other severe malaria	dom	F	0.195622	0.17806	0.271929	1.22(0.86-1.72)	EHA	218/818/893	46/223/198
Kumasi	Ghana	rs766420	153554404	TKTL1	other severe malaria	dom	F	-0.178555	0.208395	0.391549	0.84(0.56-1.26)	EHA	115/405/451	41/127/122
Madang	PapuaNewGuinea	rs766420	153554404	TKTL1	other severe malaria	dom	F	0.386122	1.23577	0.754694	1.47(0.13-16.58)	E	2/22/88	1971-12-01
Moshi	Tanzania	rs766420	153554404	TKTL1	other severe malaria	dom	F	-0.368139	0.359986	0.306475	0.69(0.34-1.4)	EHA	30/106/113	17/41/37
Noguchi	Ghana	rs766420	153554404	TKTL1	other severe malaria	dom	F	-0.00769566	0.375299	0.98364	0.99(0.48-2.07)	EHA	15/34/39	29/73/77
Ougadougou	BurkinaFaso	rs766420	153554404	TKTL1	other severe malaria	dom	F	0.00724758	0.238652	0.975773	1.01(0.63-1.61)	HA	50/159/138	39/139/108
All	All	rs766420	153554404	TKTL1	other severe malaria	dom	F	-0.00864279	0.0690429	0.900381	0.99(0.87-1.14)	EHA	1650/3529/2815	424/1129/884
Bamako	Mali	rs766420	153554404	TKTL1	other severe malaria	het	F	-0.0913195	0.358228	0.798785	0.91(0.45-1.84)	EHA	24/73/63	11/20/14
Banjul	Gambia	rs766420	153554404	TKTL1	other severe malaria	het	F	0.118898	0.105085	0.257867	1.13(0.92-1.38)	EHA	388/786/427	110/261/131
Blantyre	Malawi	rs766420	153554404	TKTL1	other severe malaria	het	F	0.0936096	0.205741	0.649118	1.1(0.73-1.64)	HA	164/592/454	16/53/36
Buea	Cameroon	rs766420	153554404	TKTL1	other severe malaria	het	F	0.152723	0.218577	0.484731	1.17(0.76-1.79)	EHA	21/79/58	38/114/69
Ho_Chi_Minh_City	VietNam	rs766420	153554404	TKTL1	other severe malaria	het	F	-0.0187766	0.186122	0.919643	0.98(0.68-1.41)	E	622/451/76	73/55/10
Ibadan	Nigeria	rs766420	153554404	TKTL1	other severe malaria	het	F	0.866454	0.799562	0.278515	2.38(0.5-11.4)	EHA	2015-04-01	2011-11-03
Kilifi	Kenya	rs766420	153554404	TKTL1	other severe malaria	het	F	0.183052	0.107148	0.087563	1.2(0.97-1.48)	EHA	218/818/893	46/223/198
Kumasi	Ghana	rs766420	153554404	TKTL1	other severe malaria	het	F	0.133368	0.142508	0.349344	1.14(0.86-1.51)	EHA	115/405/451	41/127/122
Madang	PapuaNewGuinea	rs766420	153554404	TKTL1	other severe malaria	het	F	-0.451833	0.39935	0.257878	0.64(0.29-1.39)	E	2/22/88	1971-12-01
Moshi	Tanzania	rs766420	153554404	TKTL1	other severe malaria	het	F	0.0596778	0.260065	0.818501	1.06(0.64-1.77)	EHA	30/106/113	17/41/37
Noguchi	Ghana	rs766420	153554404	TKTL1	other severe malaria	het	F	0.0718976	0.280105	0.797425	1.07(0.62-1.86)	EHA	15/34/39	29/73/77
Ougadougou	BurkinaFaso	rs766420	153554404	TKTL1	other severe malaria	het	F	0.134168	0.162748	0.409718	1.14(0.83-1.57)	HA	50/159/138	39/139/108
All	All	rs766420	153554404	TKTL1	other severe malaria	het	F	0.112142	0.0510547	0.0280556	1.12(1.01-1.24)	EHA	1650/3529/2815	424/1129/884
Bamako	Mali	rs766420	153554404	TKTL1	other severe malaria	dom	M	-0.16973	0.327498	0.604276	0.84(0.44-1.6)	EHA	58/0/109	24/0/37
Banjul	Gambia	rs766420	153554404	TKTL1	other severe malaria	dom	M	-0.00450072	0.101733	0.964713	1(0.82-1.22)	EHA	759/0/868	258/0/297
Blantyre	Malawi	rs766420	153554404	TKTL1	other severe malaria	dom	M	-0.0826428	0.215779	0.701722	0.92(0.6-1.41)	HA	494/0/832	44/0/70
Buea	Cameroon	rs766420	153554404	TKTL1	other severe malaria	dom	M	-0.0100503	0.173628	0.953841	0.99(0.7-1.39)	EHA	152/0/263	103/0/166
Ho_Chi_Minh_City	VietNam	rs766420	153554404	TKTL1	other severe malaria	dom	M	-0.0794691	0.128776	0.537163	0.92(0.72-1.19)	E	960/0/375	296/0/107
Ibadan	Nigeria	rs766420	153554404	TKTL1	other severe malaria	dom	M	1.16061	0.718296	0.10614	3.19(0.78-13.05)	EHA	9/0/8	10/0/28
Kilifi	Kenya	rs766420	153554404	TKTL1	other severe malaria	dom	M	-0.222928	0.111877	0.0463029	0.8(0.64-1)	EHA	652/0/1313	187/0/314
Kumasi	Ghana	rs766420	153554404	TKTL1	other severe malaria	dom	M	-0.214368	0.141459	0.12967	0.81(0.61-1.06)	EHA	357/0/641	134/0/202
Madang	PapuaNewGuinea	rs766420	153554404	TKTL1	other severe malaria	dom	M	0.189071	0.45931	0.680603	1.21(0.49-2.97)	E	12/0/116	10/0/117
Moshi	Tanzania	rs766420	153554404	TKTL1	other severe malaria	dom	M	0.194494	0.288701	0.500511	1.21(0.69-2.14)	EHA	71/0/134	32/0/57
Noguchi	Ghana	rs766420	153554404	TKTL1	other severe malaria	dom	M	-0.0853726	0.264385	0.746763	0.92(0.55-1.54)	EHA	42/0/66	75/0/132
Ougadougou	BurkinaFaso	rs766420	153554404	TKTL1	other severe malaria	dom	M	-0.271662	0.160392	0.0903159	0.76(0.56-1.04)	HA	117/0/252	143/0/247
All	All	rs766420	153554404	TKTL1	other severe malaria	dom	M	-0.104802	0.0486298	0.0311536	0.9(0.82-0.99)	EHA	3683/0/4977	1316/0/1774
Bamako	Mali	rs915941	153626649	FAM50A	severe malaria	add	All	0.1666	0.0945344	0.0780155	1.18(0.98-1.42)	SEHA	136/70/119	155/101/179
Banjul	Gambia	rs915941	153626649	FAM50A	severe malaria	add	All	-0.0653855	0.0328986	0.046869	0.94(0.88-1)	SEHA	1448/794/997	1232/540/702
Blantyre	Malawi	rs915941	153626649	FAM50A	severe malaria	add	All	0.0318002	0.0435646	0.465418	1.03(0.95-1.12)	SHA	951/595/1012	479/351/542
Buea	Cameroon	rs915941	153626649	FAM50A	severe malaria	add	All	-0.0185017	0.076404	0.808659	0.98(0.85-1.14)	SEHA	291/80/192	281/131/182
Ho_Chi_Minh_City	VietNam	rs915941	153626649	FAM50A	severe malaria	add	All	0.0104888	0.0931317	0.910329	1.01(0.84-1.21)	SE	91/121/2274	38/22/732
Ibadan	Nigeria	rs915941	153626649	FAM50A	severe malaria	add	All	-0.425035	0.263073	0.106169	0.65(0.39-1.09)	SEHA	2017-12-11	42/12/23
Kilifi	Kenya	rs915941	153626649	FAM50A	severe malaria	add	All	-0.00658277	0.0361063	0.855335	0.99(0.93-1.07)	SEHA	1374/997/1444	837/534/853
Kumasi	Ghana	rs915941	153626649	FAM50A	severe malaria	add	All	-0.0805486	0.0458761	0.079125	0.92(0.84-1.01)	SEHA	666/456/760	557/335/580
Madang	PapuaNewGuinea	rs915941	153626649	FAM50A	severe malaria	add	All	-0.216466	0.160664	0.177877	0.81(0.59-1.1)	SE	199/29/14	332/29/19
Moshi	Tanzania	rs915941	153626649	FAM50A	severe malaria	add	All	0.103926	0.092296	0.260163	1.11(0.93-1.33)	SEHA	166/121/168	154/105/166
Noguchi	Ghana	rs915941	153626649	FAM50A	severe malaria	add	All	-0.0291237	0.105785	0.783077	0.97(0.79-1.2)	SEHA	60/58/73	230/138/286
Ougadougou	BurkinaFaso	rs915941	153626649	FAM50A	severe malaria	add	All	0.0466279	0.0629502	0.458869	1.05(0.93-1.19)	SHA	266/178/272	310/170/357
All	All	rs915941	153626649	FAM50A	severe malaria	add	All	-0.0177463	0.0166307	0.285934	0.98(0.95-1.01)	SEHA	5659/3511/7342	4647/2468/4621
Bamako	Mali	rs915941	153626649	FAM50A	severe malaria	rec	All	0.192553	0.172381	0.263985	1.21(0.86-1.7)	SEHA	136/70/119	155/101/179
Banjul	Gambia	rs915941	153626649	FAM50A	severe malaria	rec	All	-0.0783431	0.0644105	0.223867	0.92(0.81-1.05)	SEHA	1448/794/997	1232/540/702
Blantyre	Malawi	rs915941	153626649	FAM50A	severe malaria	rec	All	0.000921535	0.0792544	0.990723	1(0.86-1.17)	SHA	951/595/1012	479/351/542
Buea	Cameroon	rs915941	153626649	FAM50A	severe malaria	rec	All	-0.00894017	0.150194	0.952535	0.99(0.74-1.33)	SEHA	291/80/192	281/131/182
Ho_Chi_Minh_City	VietNam	rs915941	153626649	FAM50A	severe malaria	rec	All	0.0115836	0.156316	0.940928	1.01(0.74-1.37)	SE	91/121/2274	38/22/732
Ibadan	Nigeria	rs915941	153626649	FAM50A	severe malaria	rec	All	-0.510328	0.482648	0.290352	0.6(0.23-1.55)	SEHA	2017-12-11	42/12/23
Kilifi	Kenya	rs915941	153626649	FAM50A	severe malaria	rec	All	0.0246974	0.0655518	0.706351	1.03(0.9-1.17)	SEHA	1374/997/1444	837/534/853
Kumasi	Ghana	rs915941	153626649	FAM50A	severe malaria	rec	All	-0.150264	0.0844689	0.0752515	0.86(0.73-1.02)	SEHA	666/456/760	557/335/580
Madang	PapuaNewGuinea	rs915941	153626649	FAM50A	severe malaria	rec	All	-0.196016	0.374057	0.600259	0.82(0.39-1.71)	SE	199/29/14	332/29/19
Moshi	Tanzania	rs915941	153626649	FAM50A	severe malaria	rec	All	0.143564	0.1681	0.393081	1.15(0.83-1.6)	SEHA	166/121/168	154/105/166
Noguchi	Ghana	rs915941	153626649	FAM50A	severe malaria	rec	All	0.142031	0.197425	0.471886	1.15(0.78-1.7)	SEHA	60/58/73	230/138/286
Ougadougou	BurkinaFaso	rs915941	153626649	FAM50A	severe malaria	rec	All	0.132518	0.11635	0.25472	1.14(0.91-1.43)	SHA	266/178/272	310/170/357
All	All	rs915941	153626649	FAM50A	severe malaria	rec	All	-0.0314228	0.0307546	0.306911	0.97(0.91-1.03)	SEHA	5659/3511/7342	4647/2468/4621
Bamako	Mali	rs915941	153626649	FAM50A	severe malaria	dom	All	0.373063	0.173954	0.031984	1.45(1.03-2.04)	SEHA	136/70/119	155/101/179
Banjul	Gambia	rs915941	153626649	FAM50A	severe malaria	dom	All	-0.138501	0.0577104	0.0163983	0.87(0.78-0.97)	SEHA	1448/794/997	1232/540/702
Blantyre	Malawi	rs915941	153626649	FAM50A	severe malaria	dom	All	0.106672	0.0801968	0.183477	1.11(0.95-1.3)	SHA	951/595/1012	479/351/542
Buea	Cameroon	rs915941	153626649	FAM50A	severe malaria	dom	All	-0.0523766	0.137058	0.702352	0.95(0.73-1.24)	SEHA	291/80/192	281/131/182
Ho_Chi_Minh_City	VietNam	rs915941	153626649	FAM50A	severe malaria	dom	All	0.0296426	0.201248	0.8829	1.03(0.69-1.53)	SE	91/121/2274	38/22/732
Ibadan	Nigeria	rs915941	153626649	FAM50A	severe malaria	dom	All	-0.930254	0.504187	0.0650294	0.39(0.15-1.06)	SEHA	2017-12-11	42/12/23
Kilifi	Kenya	rs915941	153626649	FAM50A	severe malaria	dom	All	-0.0464976	0.0655425	0.47806	0.95(0.84-1.09)	SEHA	1374/997/1444	837/534/853
Kumasi	Ghana	rs915941	153626649	FAM50A	severe malaria	dom	All	-0.121808	0.0842956	0.148456	0.89(0.75-1.04)	SEHA	666/456/760	557/335/580
Madang	PapuaNewGuinea	rs915941	153626649	FAM50A	severe malaria	dom	All	-0.395085	0.239745	0.0993657	0.67(0.42-1.08)	SE	199/29/14	332/29/19
Moshi	Tanzania	rs915941	153626649	FAM50A	severe malaria	dom	All	0.198027	0.166386	0.233981	1.22(0.88-1.69)	SEHA	166/121/168	154/105/166
Noguchi	Ghana	rs915941	153626649	FAM50A	severe malaria	dom	All	-0.25215	0.198533	0.204061	0.78(0.53-1.15)	SEHA	60/58/73	230/138/286
Ougadougou	BurkinaFaso	rs915941	153626649	FAM50A	severe malaria	dom	All	0.0266972	0.116632	0.818946	1.03(0.82-1.29)	SHA	266/178/272	310/170/357
All	All	rs915941	153626649	FAM50A	severe malaria	dom	All	-0.028175	0.0301436	0.349947	0.97(0.92-1.03)	SEHA	5659/3511/7342	4647/2468/4621
Bamako	Mali	rs915941	153626649	FAM50A	severe malaria	add	F	0.142231	0.163682	0.384875	1.15(0.84-1.59)	EHA	47/70/41	42/101/49
Banjul	Gambia	rs915941	153626649	FAM50A	severe malaria	add	F	-0.0481376	0.0580302	0.406806	0.95(0.85-1.07)	EHA	550/794/277	452/540/193
Blantyre	Malawi	rs915941	153626649	FAM50A	severe malaria	add	F	0.0604258	0.0767038	0.430825	1.06(0.91-1.23)	HA	302/595/327	149/351/172
Buea	Cameroon	rs915941	153626649	FAM50A	severe malaria	add	F	-0.0349906	0.164063	0.831112	0.97(0.7-1.33)	EHA	52/80/27	99/131/45
Ho_Chi_Minh_City	VietNam	rs915941	153626649	FAM50A	severe malaria	add	F	-0.0405564	0.230315	0.860222	0.96(0.61-1.51)	E	3/121/1029	1/22/187
Ibadan	Nigeria	rs915941	153626649	FAM50A	severe malaria	add	F	-0.293957	0.468946	0.53076	0.75(0.3-1.87)	EHA	2006-12-04	2007-12-12
Kilifi	Kenya	rs915941	153626649	FAM50A	severe malaria	add	F	0.11415	0.0634257	0.0719003	1.12(0.99-1.27)	EHA	467/997/458	269/534/279
Kumasi	Ghana	rs915941	153626649	FAM50A	severe malaria	add	F	-0.106583	0.0811524	0.18906	0.9(0.77-1.05)	EHA	243/456/267	183/335/166
Madang	PapuaNewGuinea	rs915941	153626649	FAM50A	severe malaria	add	F	-0.229211	0.275529	0.405468	0.8(0.46-1.36)	E	84/29/0	137/29/3
Moshi	Tanzania	rs915941	153626649	FAM50A	severe malaria	add	F	0.0242961	0.164762	0.882767	1.02(0.74-1.42)	EHA	64/121/65	48/105/46
Noguchi	Ghana	rs915941	153626649	FAM50A	severe malaria	add	F	0.0342196	0.21054	0.870886	1.03(0.68-1.56)	EHA	12/58/17	60/138/85
Ougadougou	BurkinaFaso	rs915941	153626649	FAM50A	severe malaria	add	F	-0.026365	0.117124	0.821899	0.97(0.77-1.23)	HA	84/178/83	93/170/97
All	All	rs915941	153626649	FAM50A	severe malaria	add	F	0.00426877	0.0299417	0.88663	1(0.95-1.06)	EHA	1912/3511/2597	1545/2468/1329
Bamako	Mali	rs915941	153626649	FAM50A	severe malaria	rec	F	-0.00275382	0.261364	0.991593	1(0.6-1.66)	EHA	47/70/41	42/101/49
Banjul	Gambia	rs915941	153626649	FAM50A	severe malaria	rec	F	0.0499782	0.108369	0.644665	1.05(0.85-1.3)	EHA	550/794/277	452/540/193
Blantyre	Malawi	rs915941	153626649	FAM50A	severe malaria	rec	F	-0.0434027	0.11899	0.71529	0.96(0.76-1.21)	HA	302/595/327	149/351/172
Buea	Cameroon	rs915941	153626649	FAM50A	severe malaria	rec	F	0.083543	0.303166	0.78288	1.09(0.6-1.97)	EHA	52/80/27	99/131/45
Ho_Chi_Minh_City	VietNam	rs915941	153626649	FAM50A	severe malaria	rec	F	-0.022992	0.241451	0.924137	0.98(0.61-1.57)	E	3/121/1029	1/22/187
Ibadan	Nigeria	rs915941	153626649	FAM50A	severe malaria	rec	F	0.298477	0.783478	0.70323	1.35(0.29-6.26)	EHA	2006-12-04	2007-12-12
Kilifi	Kenya	rs915941	153626649	FAM50A	severe malaria	rec	F	0.217452	0.0986146	0.027449	1.24(1.02-1.51)	EHA	467/997/458	269/534/279
Kumasi	Ghana	rs915941	153626649	FAM50A	severe malaria	rec	F	-0.167031	0.129731	0.197912	0.85(0.66-1.09)	EHA	243/456/267	183/335/166
Madang	PapuaNewGuinea	rs915941	153626649	FAM50A	severe malaria	rec	F	15.2619	840.274	0.985509	4247566.86(0-Inf)	E	84/29/0	137/29/3
Moshi	Tanzania	rs915941	153626649	FAM50A	severe malaria	rec	F	-0.051306	0.258151	0.842463	0.95(0.57-1.58)	EHA	64/121/65	48/105/46
Noguchi	Ghana	rs915941	153626649	FAM50A	severe malaria	rec	F	0.580502	0.337201	0.0851543	1.79(0.92-3.46)	EHA	12/58/17	60/138/85
Ougadougou	BurkinaFaso	rs915941	153626649	FAM50A	severe malaria	rec	F	0.102455	0.185463	0.580656	1.11(0.77-1.59)	HA	84/178/83	93/170/97
All	All	rs915941	153626649	FAM50A	severe malaria	rec	F	0.0509365	0.0488225	0.296809	1.05(0.96-1.16)	EHA	1912/3511/2597	1545/2468/1329
Bamako	Mali	rs915941	153626649	FAM50A	severe malaria	dom	F	0.377882	0.265198	0.154185	1.46(0.87-2.45)	EHA	47/70/41	42/101/49
Banjul	Gambia	rs915941	153626649	FAM50A	severe malaria	dom	F	-0.129215	0.083395	0.121278	0.88(0.75-1.03)	EHA	550/794/277	452/540/193
Blantyre	Malawi	rs915941	153626649	FAM50A	severe malaria	dom	F	0.201359	0.123561	0.103179	1.22(0.96-1.56)	HA	302/595/327	149/351/172
Buea	Cameroon	rs915941	153626649	FAM50A	severe malaria	dom	F	-0.117188	0.230502	0.611172	0.89(0.57-1.4)	EHA	52/80/27	99/131/45
Ho_Chi_Minh_City	VietNam	rs915941	153626649	FAM50A	severe malaria	dom	F	-0.572957	1.1626	0.622138	0.56(0.06-5.51)	E	3/121/1029	1/22/187
Ibadan	Nigeria	rs915941	153626649	FAM50A	severe malaria	dom	F	-1.04408	0.794742	0.188934	0.35(0.07-1.67)	EHA	2006-12-04	2007-12-12
Kilifi	Kenya	rs915941	153626649	FAM50A	severe malaria	dom	F	0.0599761	0.0988786	0.544141	1.06(0.87-1.29)	EHA	467/997/458	269/534/279
Kumasi	Ghana	rs915941	153626649	FAM50A	severe malaria	dom	F	-0.104636	0.129487	0.419043	0.9(0.7-1.16)	EHA	243/456/267	183/335/166
Madang	PapuaNewGuinea	rs915941	153626649	FAM50A	severe malaria	dom	F	-0.378271	0.296998	0.202788	0.69(0.38-1.23)	E	84/29/0	137/29/3
Moshi	Tanzania	rs915941	153626649	FAM50A	severe malaria	dom	F	0.105423	0.25167	0.675293	1.11(0.68-1.82)	EHA	64/121/65	48/105/46
Noguchi	Ghana	rs915941	153626649	FAM50A	severe malaria	dom	F	-0.585164	0.368713	0.112503	0.56(0.27-1.15)	EHA	12/58/17	60/138/85
Ougadougou	BurkinaFaso	rs915941	153626649	FAM50A	severe malaria	dom	F	-0.170662	0.18674	0.360768	0.84(0.58-1.22)	HA	84/178/83	93/170/97
All	All	rs915941	153626649	FAM50A	severe malaria	dom	F	-0.0349969	0.0459111	0.445895	0.97(0.88-1.06)	EHA	1912/3511/2597	1545/2468/1329
Bamako	Mali	rs915941	153626649	FAM50A	severe malaria	het	F	0.271098	0.224165	0.226522	1.31(0.85-2.03)	EHA	47/70/41	42/101/49
Banjul	Gambia	rs915941	153626649	FAM50A	severe malaria	het	F	-0.143451	0.0793613	0.0706741	0.87(0.74-1.01)	EHA	550/794/277	452/540/193
Blantyre	Malawi	rs915941	153626649	FAM50A	severe malaria	het	F	0.154772	0.0971796	0.111242	1.17(0.96-1.41)	HA	302/595/327	149/351/172
Buea	Cameroon	rs915941	153626649	FAM50A	severe malaria	het	F	-0.137218	0.209539	0.51256	0.87(0.58-1.31)	EHA	52/80/27	99/131/45
Ho_Chi_Minh_City	VietNam	rs915941	153626649	FAM50A	severe malaria	het	F	0.00172319	0.245728	0.994405	1(0.62-1.62)	E	3/121/1029	1/22/187
Ibadan	Nigeria	rs915941	153626649	FAM50A	severe malaria	het	F	-0.917402	0.642897	0.153586	0.4(0.11-1.41)	EHA	2006-12-04	2007-12-12
Kilifi	Kenya	rs915941	153626649	FAM50A	severe malaria	het	F	-0.100492	0.0790937	0.20389	0.9(0.77-1.06)	EHA	467/997/458	269/534/279
Kumasi	Ghana	rs915941	153626649	FAM50A	severe malaria	het	F	0.0436717	0.107361	0.684174	1.04(0.85-1.29)	EHA	243/456/267	183/335/166
Madang	PapuaNewGuinea	rs915941	153626649	FAM50A	severe malaria	het	F	-0.50721	0.302505	0.0936014	0.6(0.33-1.09)	E	84/29/0	137/29/3
Moshi	Tanzania	rs915941	153626649	FAM50A	severe malaria	het	F	0.0982766	0.200937	0.624776	1.1(0.74-1.64)	EHA	64/121/65	48/105/46
Noguchi	Ghana	rs915941	153626649	FAM50A	severe malaria	het	F	-0.689554	0.265347	0.00935822	0.5(0.3-0.84)	EHA	12/58/17	60/138/85
Ougadougou	BurkinaFaso	rs915941	153626649	FAM50A	severe malaria	het	F	-0.184168	0.152947	0.228541	0.83(0.62-1.12)	HA	84/178/83	93/170/97
All	All	rs915941	153626649	FAM50A	severe malaria	het	F	-0.0566667	0.0386543	0.142652	0.94(0.88-1.02)	EHA	1912/3511/2597	1545/2468/1329
Bamako	Mali	rs915941	153626649	FAM50A	severe malaria	dom	M	0.376244	0.231241	0.103724	1.46(0.93-2.29)	EHA	89/0/78	113/0/130
Banjul	Gambia	rs915941	153626649	FAM50A	severe malaria	dom	M	-0.148224	0.0799475	0.0637367	0.86(0.74-1.01)	EHA	898/0/720	780/0/509
Blantyre	Malawi	rs915941	153626649	FAM50A	severe malaria	dom	M	0.0372139	0.105998	0.725528	1.04(0.84-1.28)	HA	649/0/685	330/0/370
Buea	Cameroon	rs915941	153626649	FAM50A	severe malaria	dom	M	-0.0155281	0.17215	0.928127	0.98(0.7-1.38)	EHA	239/0/165	182/0/137
Ho_Chi_Minh_City	VietNam	rs915941	153626649	FAM50A	severe malaria	dom	M	0.0367152	0.203693	0.856958	1.04(0.7-1.55)	E	88/0/1245	37/0/545
Ibadan	Nigeria	rs915941	153626649	FAM50A	severe malaria	dom	M	-0.877383	0.659901	0.18366	0.42(0.11-1.52)	EHA	7/0/11	30/0/16
Kilifi	Kenya	rs915941	153626649	FAM50A	severe malaria	dom	M	-0.128998	0.0877989	0.141765	0.88(0.74-1.04)	EHA	907/0/986	568/0/574
Kumasi	Ghana	rs915941	153626649	FAM50A	severe malaria	dom	M	-0.138802	0.112115	0.215704	0.87(0.7-1.08)	EHA	423/0/493	374/0/414
Madang	PapuaNewGuinea	rs915941	153626649	FAM50A	severe malaria	dom	M	-0.432009	0.399765	0.279849	0.65(0.3-1.42)	E	115/0/14	195/0/16
Moshi	Tanzania	rs915941	153626649	FAM50A	severe malaria	dom	M	0.24746	0.225923	0.273372	1.28(0.82-1.99)	EHA	102/0/103	106/0/120
Noguchi	Ghana	rs915941	153626649	FAM50A	severe malaria	dom	M	-0.11445	0.246009	0.641768	0.89(0.55-1.44)	EHA	48/0/56	170/0/201
Ougadougou	BurkinaFaso	rs915941	153626649	FAM50A	severe malaria	dom	M	0.148984	0.149888	0.320238	1.16(0.87-1.56)	HA	182/0/189	217/0/260
All	All	rs915941	153626649	FAM50A	severe malaria	dom	M	-0.0547587	0.0400074	0.171089	0.95(0.88-1.02)	EHA	3747/0/4745	3102/0/3292
Bamako	Mali	rs915941	153626649	FAM50A	cerebal malaria	add	All	0.188645	0.146278	0.197178	1.21(0.91-1.61)	SEHA	136/70/119	33/17/28
Banjul	Gambia	rs915941	153626649	FAM50A	cerebal malaria	add	All	-0.0381142	0.048049	0.427641	0.96(0.88-1.06)	SEHA	1448/794/997	397/184/229
Blantyre	Malawi	rs915941	153626649	FAM50A	cerebal malaria	add	All	-0.00298844	0.0509064	0.953187	1(0.9-1.1)	SHA	951/595/1012	324/219/325
Buea	Cameroon	rs915941	153626649	FAM50A	cerebal malaria	add	All	-0.0776506	0.211608	0.713653	0.93(0.61-1.4)	SEHA	291/80/192	2009-09-19
Ho_Chi_Minh_City	VietNam	rs915941	153626649	FAM50A	cerebal malaria	add	All	0.258624	0.193256	0.180818	1.3(0.89-1.89)	SE	91/121/2274	7/3/199
Ibadan	Nigeria	rs915941	153626649	FAM50A	cerebal malaria	add	All	0.346995	0.590077	0.556498	1.41(0.45-4.5)	SEHA	2017-12-11	2/0/4
Kilifi	Kenya	rs915941	153626649	FAM50A	cerebal malaria	add	All	-0.00932626	0.0490609	0.849234	0.99(0.9-1.09)	SEHA	1374/997/1444	344/213/337
Kumasi	Ghana	rs915941	153626649	FAM50A	cerebal malaria	add	All	-0.0754341	0.0901064	0.402499	0.93(0.78-1.11)	SEHA	666/456/760	90/57/79
Madang	PapuaNewGuinea	rs915941	153626649	FAM50A	cerebal malaria	add	All	-0.47201	0.500232	0.345383	0.62(0.23-1.66)	SE	199/29/14	41/1/2
Moshi	Tanzania	rs915941	153626649	FAM50A	cerebal malaria	add	All	0.114135	0.235163	0.627432	1.12(0.71-1.78)	SEHA	166/121/168	2013-10-11
Noguchi	Ghana	rs915941	153626649	FAM50A	cerebal malaria	add	All	-0.0341431	0.340274	0.920074	0.97(0.5-1.88)	SEHA	60/58/73	2010-01-09
Ougadougou	BurkinaFaso	rs915941	153626649	FAM50A	cerebal malaria	add	All	-0.0921826	0.132781	0.487528	0.91(0.7-1.18)	SHA	266/178/272	42/27/38
All	All	rs915941	153626649	FAM50A	cerebal malaria	add	All	-0.0155615	0.025103	0.535321	0.98(0.94-1.03)	SEHA	5659/3511/7342	1319/741/1273
Bamako	Mali	rs915941	153626649	FAM50A	cerebal malaria	rec	All	0.255398	0.278207	0.358611	1.29(0.75-2.23)	SEHA	136/70/119	33/17/28
Banjul	Gambia	rs915941	153626649	FAM50A	cerebal malaria	rec	All	-0.038911	0.0940941	0.679216	0.96(0.8-1.16)	SEHA	1448/794/997	397/184/229
Blantyre	Malawi	rs915941	153626649	FAM50A	cerebal malaria	rec	All	-0.0346458	0.0931463	0.709929	0.97(0.8-1.16)	SHA	951/595/1012	324/219/325
Buea	Cameroon	rs915941	153626649	FAM50A	cerebal malaria	rec	All	-0.173346	0.444027	0.696244	0.84(0.35-2.01)	SEHA	291/80/192	2009-09-19
Ho_Chi_Minh_City	VietNam	rs915941	153626649	FAM50A	cerebal malaria	rec	All	0.47386	0.331938	0.153421	1.61(0.84-3.08)	SE	91/121/2274	7/3/199
Ibadan	Nigeria	rs915941	153626649	FAM50A	cerebal malaria	rec	All	1.11385	1.08483	0.304538	3.05(0.36-25.54)	SEHA	2017-12-11	2/0/4
Kilifi	Kenya	rs915941	153626649	FAM50A	cerebal malaria	rec	All	0.0398721	0.0890673	0.654397	1.04(0.87-1.24)	SEHA	1374/997/1444	344/213/337
Kumasi	Ghana	rs915941	153626649	FAM50A	cerebal malaria	rec	All	-0.171019	0.168159	0.309148	0.84(0.61-1.17)	SEHA	666/456/760	90/57/79
Madang	PapuaNewGuinea	rs915941	153626649	FAM50A	cerebal malaria	rec	All	-0.118087	0.806256	0.883555	0.89(0.18-4.32)	SE	199/29/14	41/1/2
Moshi	Tanzania	rs915941	153626649	FAM50A	cerebal malaria	rec	All	0.0791468	0.42027	0.850623	1.08(0.47-2.47)	SEHA	166/121/168	2013-10-11
Noguchi	Ghana	rs915941	153626649	FAM50A	cerebal malaria	rec	All	0.685971	0.527749	0.193667	1.99(0.71-5.59)	SEHA	60/58/73	2010-01-09
Ougadougou	BurkinaFaso	rs915941	153626649	FAM50A	cerebal malaria	rec	All	-0.216295	0.25467	0.395707	0.81(0.49-1.33)	SHA	266/178/272	42/27/38
All	All	rs915941	153626649	FAM50A	cerebal malaria	rec	All	-0.0261302	0.0465844	0.574851	0.97(0.89-1.07)	SEHA	5659/3511/7342	1319/741/1273
Bamako	Mali	rs915941	153626649	FAM50A	cerebal malaria	dom	All	0.403207	0.274707	0.142166	1.5(0.87-2.56)	SEHA	136/70/119	33/17/28
Banjul	Gambia	rs915941	153626649	FAM50A	cerebal malaria	dom	All	-0.0851394	0.0836223	0.30861	0.92(0.78-1.08)	SEHA	1448/794/997	397/184/229
Blantyre	Malawi	rs915941	153626649	FAM50A	cerebal malaria	dom	All	0.0247801	0.0928437	0.789545	1.03(0.85-1.23)	SHA	951/595/1012	324/219/325
Buea	Cameroon	rs915941	153626649	FAM50A	cerebal malaria	dom	All	-0.100389	0.354228	0.776868	0.9(0.45-1.81)	SEHA	291/80/192	2009-09-19
Ho_Chi_Minh_City	VietNam	rs915941	153626649	FAM50A	cerebal malaria	dom	All	0.448248	0.396836	0.258664	1.57(0.72-3.41)	SE	91/121/2274	7/3/199
Ibadan	Nigeria	rs915941	153626649	FAM50A	cerebal malaria	dom	All	0.115802	1.01415	0.90909	1.12(0.15-8.19)	SEHA	2017-12-11	2/0/4
Kilifi	Kenya	rs915941	153626649	FAM50A	cerebal malaria	dom	All	-0.0707881	0.0887064	0.424867	0.93(0.78-1.11)	SEHA	1374/997/1444	344/213/337
Kumasi	Ghana	rs915941	153626649	FAM50A	cerebal malaria	dom	All	-0.0876759	0.167473	0.600611	0.92(0.66-1.27)	SEHA	666/456/760	90/57/79
Madang	PapuaNewGuinea	rs915941	153626649	FAM50A	cerebal malaria	dom	All	-0.996265	0.684119	0.145316	0.37(0.1-1.41)	SE	199/29/14	41/1/2
Moshi	Tanzania	rs915941	153626649	FAM50A	cerebal malaria	dom	All	0.303302	0.457738	0.50758	1.35(0.55-3.32)	SEHA	166/121/168	2013-10-11
Noguchi	Ghana	rs915941	153626649	FAM50A	cerebal malaria	dom	All	-0.859587	0.655466	0.189718	0.42(0.12-1.53)	SEHA	60/58/73	2010-01-09
Ougadougou	BurkinaFaso	rs915941	153626649	FAM50A	cerebal malaria	dom	All	-0.100436	0.236508	0.671082	0.9(0.57-1.44)	SHA	266/178/272	42/27/38
All	All	rs915941	153626649	FAM50A	cerebal malaria	dom	All	-0.0261368	0.04554	0.566015	0.97(0.89-1.07)	SEHA	5659/3511/7342	1319/741/1273
Bamako	Mali	rs915941	153626649	FAM50A	cerebal malaria	add	F	0.773968	0.31924	0.0153333	2.17(1.16-4.05)	EHA	47/70/41	4/17/11
Banjul	Gambia	rs915941	153626649	FAM50A	cerebal malaria	add	F	-0.0636556	0.0842196	0.449752	0.94(0.8-1.11)	EHA	550/794/277	156/184/60
Blantyre	Malawi	rs915941	153626649	FAM50A	cerebal malaria	add	F	-0.00380944	0.0885216	0.965674	1(0.84-1.18)	HA	302/595/327	108/219/107
Buea	Cameroon	rs915941	153626649	FAM50A	cerebal malaria	add	F	0.398091	0.416556	0.339238	1.49(0.66-3.37)	EHA	52/80/27	2003-09-05
Ho_Chi_Minh_City	VietNam	rs915941	153626649	FAM50A	cerebal malaria	add	F	0.566491	0.596665	0.342403	1.76(0.55-5.67)	E	3/121/1029	0/3/44
Ibadan	Nigeria	rs915941	153626649	FAM50A	cerebal malaria	add	F	0.0235827	1.12481	0.983273	1.02(0.11-9.28)	EHA	2006-12-04	1/0/1
Kilifi	Kenya	rs915941	153626649	FAM50A	cerebal malaria	add	F	0.126252	0.0874316	0.148736	1.13(0.96-1.35)	EHA	467/997/458	107/213/119
Kumasi	Ghana	rs915941	153626649	FAM50A	cerebal malaria	add	F	-0.181517	0.163151	0.265894	0.83(0.61-1.15)	EHA	243/456/267	34/57/20
Madang	PapuaNewGuinea	rs915941	153626649	FAM50A	cerebal malaria	add	F	-1.8032	1.08148	0.0954462	0.16(0.02-1.37)	E	84/29/0	2000-01-18
Moshi	Tanzania	rs915941	153626649	FAM50A	cerebal malaria	add	F	-0.287402	0.430531	0.50442	0.75(0.32-1.74)	EHA	64/121/65	2003-10-04
Noguchi	Ghana	rs915941	153626649	FAM50A	cerebal malaria	add	F	-0.676336	0.612287	0.269331	0.51(0.15-1.69)	EHA	12/58/17	2004-01-05
Ougadougou	BurkinaFaso	rs915941	153626649	FAM50A	cerebal malaria	add	F	-0.0779805	0.252832	0.757756	0.92(0.56-1.52)	HA	84/178/83	9/27/12
All	All	rs915941	153626649	FAM50A	cerebal malaria	add	F	0.0115541	0.0452349	0.798395	1.01(0.93-1.11)	EHA	1912/3511/2597	451/741/384
Bamako	Mali	rs915941	153626649	FAM50A	cerebal malaria	rec	F	0.76699	0.461832	0.0967627	2.15(0.87-5.32)	EHA	47/70/41	4/17/11
Banjul	Gambia	rs915941	153626649	FAM50A	cerebal malaria	rec	F	-0.0179623	0.159436	0.910299	0.98(0.72-1.34)	EHA	550/794/277	156/184/60
Blantyre	Malawi	rs915941	153626649	FAM50A	cerebal malaria	rec	F	-0.0721154	0.140032	0.606559	0.93(0.71-1.22)	HA	302/595/327	108/219/107
Buea	Cameroon	rs915941	153626649	FAM50A	cerebal malaria	rec	F	0.711112	0.739169	0.336029	2.04(0.48-8.67)	EHA	52/80/27	2003-09-05
Ho_Chi_Minh_City	VietNam	rs915941	153626649	FAM50A	cerebal malaria	rec	F	0.562223	0.604727	0.35252	1.75(0.54-5.74)	E	3/121/1029	0/3/44
Ibadan	Nigeria	rs915941	153626649	FAM50A	cerebal malaria	rec	F	1.35143	1.68972	0.423831	3.86(0.14-105.98)	EHA	2006-12-04	1/0/1
Kilifi	Kenya	rs915941	153626649	FAM50A	cerebal malaria	rec	F	0.280291	0.132779	0.0347763	1.32(1.02-1.72)	EHA	467/997/458	107/213/119
Kumasi	Ghana	rs915941	153626649	FAM50A	cerebal malaria	rec	F	-0.372681	0.282564	0.187194	0.69(0.4-1.2)	EHA	243/456/267	34/57/20
Madang	PapuaNewGuinea	rs915941	153626649	FAM50A	cerebal malaria	rec	F	NA	NA	NA	NA(NA-NA)	E	84/29/0	2000-01-18
Moshi	Tanzania	rs915941	153626649	FAM50A	cerebal malaria	rec	F	-0.73191	0.735221	0.319495	0.48(0.11-2.03)	EHA	64/121/65	2003-10-04
Noguchi	Ghana	rs915941	153626649	FAM50A	cerebal malaria	rec	F	1.01151	0.775648	0.192203	2.75(0.6-12.58)	EHA	12/58/17	2004-01-05
Ougadougou	BurkinaFaso	rs915941	153626649	FAM50A	cerebal malaria	rec	F	-0.247516	0.391051	0.526766	0.78(0.36-1.68)	HA	84/178/83	9/27/12
All	All	rs915941	153626649	FAM50A	cerebal malaria	rec	F	0.0656215	0.0737222	0.373402	1.07(0.92-1.23)	EHA	1912/3511/2597	451/741/384
Bamako	Mali	rs915941	153626649	FAM50A	cerebal malaria	dom	F	1.3675	0.613885	0.0259062	3.93(1.18-13.07)	EHA	47/70/41	4/17/11
Banjul	Gambia	rs915941	153626649	FAM50A	cerebal malaria	dom	F	-0.11794	0.118747	0.32061	0.89(0.7-1.12)	EHA	550/794/277	156/184/60
Blantyre	Malawi	rs915941	153626649	FAM50A	cerebal malaria	dom	F	0.0627795	0.139994	0.653832	1.06(0.81-1.4)	HA	302/595/327	108/219/107
Buea	Cameroon	rs915941	153626649	FAM50A	cerebal malaria	dom	F	0.363751	0.575863	0.527607	1.44(0.47-4.45)	EHA	52/80/27	2003-09-05
Ho_Chi_Minh_City	VietNam	rs915941	153626649	FAM50A	cerebal malaria	dom	F	14.2724	2277.71	0.995	1579130.42(0-Inf)	E	3/121/1029	0/3/44
Ibadan	Nigeria	rs915941	153626649	FAM50A	cerebal malaria	dom	F	-1.40028	1.74994	0.423604	0.25(0.01-7.61)	EHA	2006-12-04	1/0/1
Kilifi	Kenya	rs915941	153626649	FAM50A	cerebal malaria	dom	F	0.0183013	0.13717	0.89386	1.02(0.78-1.33)	EHA	467/997/458	107/213/119
Kumasi	Ghana	rs915941	153626649	FAM50A	cerebal malaria	dom	F	-0.12378	0.25599	0.628716	0.88(0.53-1.46)	EHA	243/456/267	34/57/20
Madang	PapuaNewGuinea	rs915941	153626649	FAM50A	cerebal malaria	dom	F	-1.8032	1.08148	0.0954462	0.16(0.02-1.37)	E	84/29/0	2000-01-18
Moshi	Tanzania	rs915941	153626649	FAM50A	cerebal malaria	dom	F	-0.015343	0.653518	0.981269	0.98(0.27-3.54)	EHA	64/121/65	2003-10-04
Noguchi	Ghana	rs915941	153626649	FAM50A	cerebal malaria	dom	F	-2.55604	0.87678	0.00355398	0.08(0.01-0.43)	EHA	12/58/17	2004-01-05
Ougadougou	BurkinaFaso	rs915941	153626649	FAM50A	cerebal malaria	dom	F	0.0794392	0.41752	0.849102	1.08(0.48-2.45)	HA	84/178/83	9/27/12
All	All	rs915941	153626649	FAM50A	cerebal malaria	dom	F	-0.0301632	0.068913	0.661604	0.97(0.85-1.11)	EHA	1912/3511/2597	451/741/384
Bamako	Mali	rs915941	153626649	FAM50A	cerebal malaria	het	F	0.243673	0.407644	0.550001	1.28(0.57-2.84)	EHA	47/70/41	4/17/11
Banjul	Gambia	rs915941	153626649	FAM50A	cerebal malaria	het	F	-0.0990329	0.114282	0.386181	0.91(0.72-1.13)	EHA	550/794/277	156/184/60
Blantyre	Malawi	rs915941	153626649	FAM50A	cerebal malaria	het	F	0.0879136	0.112708	0.435385	1.09(0.88-1.36)	HA	302/595/327	108/219/107
Buea	Cameroon	rs915941	153626649	FAM50A	cerebal malaria	het	F	0.00275901	0.525897	0.995814	1(0.36-2.81)	EHA	52/80/27	2003-09-05
Ho_Chi_Minh_City	VietNam	rs915941	153626649	FAM50A	cerebal malaria	het	F	-0.536818	0.604761	0.374727	0.58(0.18-1.91)	E	3/121/1029	0/3/44
Ibadan	Nigeria	rs915941	153626649	FAM50A	cerebal malaria	het	F	-19.1354	5841.86	0.997386	0(0-Inf)	EHA	2006-12-04	1/0/1
Kilifi	Kenya	rs915941	153626649	FAM50A	cerebal malaria	het	F	-0.172052	0.109064	0.114674	0.84(0.68-1.04)	EHA	467/997/458	107/213/119
Kumasi	Ghana	rs915941	153626649	FAM50A	cerebal malaria	het	F	0.157857	0.222186	0.477412	1.17(0.76-1.81)	EHA	243/456/267	34/57/20
Madang	PapuaNewGuinea	rs915941	153626649	FAM50A	cerebal malaria	het	F	-1.8032	1.08148	0.0954462	0.16(0.02-1.37)	E	84/29/0	2000-01-18
Moshi	Tanzania	rs915941	153626649	FAM50A	cerebal malaria	het	F	0.406649	0.522567	0.436466	1.5(0.54-4.18)	EHA	64/121/65	2003-10-04
Noguchi	Ghana	rs915941	153626649	FAM50A	cerebal malaria	het	F	-3.00587	1.09383	0.00599576	0.05(0.01-0.42)	EHA	12/58/17	2004-01-05
Ougadougou	BurkinaFaso	rs915941	153626649	FAM50A	cerebal malaria	het	F	0.212341	0.315667	0.501155	1.24(0.67-2.3)	HA	84/178/83	9/27/12
All	All	rs915941	153626649	FAM50A	cerebal malaria	het	F	-0.0625131	0.058444	0.284789	0.94(0.84-1.05)	EHA	1912/3511/2597	451/741/384
Bamako	Mali	rs915941	153626649	FAM50A	cerebal malaria	dom	M	-0.00758568	0.381826	0.98415	0.99(0.47-2.1)	EHA	89/0/78	29/0/17
Banjul	Gambia	rs915941	153626649	FAM50A	cerebal malaria	dom	M	-0.0509771	0.117533	0.664487	0.95(0.75-1.2)	EHA	898/0/720	241/0/169
Blantyre	Malawi	rs915941	153626649	FAM50A	cerebal malaria	dom	M	-0.00448969	0.124093	0.971139	1(0.78-1.27)	HA	649/0/685	216/0/218
Buea	Cameroon	rs915941	153626649	FAM50A	cerebal malaria	dom	M	-0.52713	0.566712	0.352291	0.59(0.19-1.79)	EHA	239/0/165	14/0/6
Ho_Chi_Minh_City	VietNam	rs915941	153626649	FAM50A	cerebal malaria	dom	M	0.452665	0.403419	0.261832	1.57(0.71-3.47)	E	88/0/1245	7/0/155
Ibadan	Nigeria	rs915941	153626649	FAM50A	cerebal malaria	dom	M	0.875469	1.33542	0.512096	2.4(0.18-32.88)	HA	7/0/11	1/0/3
Kilifi	Kenya	rs915941	153626649	FAM50A	cerebal malaria	dom	M	-0.134744	0.118844	0.25688	0.87(0.69-1.1)	EHA	907/0/986	237/0/218
Kumasi	Ghana	rs915941	153626649	FAM50A	cerebal malaria	dom	M	-0.0530621	0.223917	0.812678	0.95(0.61-1.47)	EHA	423/0/493	56/0/59
Madang	PapuaNewGuinea	rs915941	153626649	FAM50A	cerebal malaria	dom	M	-0.159065	0.808487	0.844028	0.85(0.17-4.16)	E	115/0/14	23/0/2
Moshi	Tanzania	rs915941	153626649	FAM50A	cerebal malaria	dom	M	0.55442	0.573801	0.333933	1.74(0.57-5.36)	EHA	102/0/103	7/0/10
Noguchi	Ghana	rs915941	153626649	FAM50A	cerebal malaria	dom	M	0.473009	0.713099	0.507129	1.6(0.4-6.49)	EHA	48/0/56	4/0/6
Ougadougou	BurkinaFaso	rs915941	153626649	FAM50A	cerebal malaria	dom	M	-0.212233	0.300365	0.479825	0.81(0.45-1.46)	HA	182/0/189	33/0/26
All	All	rs915941	153626649	FAM50A	cerebal malaria	dom	M	-0.0489892	0.0611628	0.423153	0.95(0.84-1.07)	EHA	3747/0/4745	868/0/889
Bamako	Mali	rs915941	153626649	FAM50A	severe malaria1 anaemia	add	All	0.184101	0.115914	0.112229	1.2(0.96-1.51)	SEHA	136/70/119	60/41/80
Banjul	Gambia	rs915941	153626649	FAM50A	severe malaria1 anaemia	add	All	-0.0574623	0.0605274	0.342437	0.94(0.84-1.06)	SEHA	1448/794/997	224/101/138
Blantyre	Malawi	rs915941	153626649	FAM50A	severe malaria1 anaemia	add	All	0.231312	0.118048	0.0500573	1.26(1-1.59)	SHA	951/595/1012	31/37/60
Buea	Cameroon	rs915941	153626649	FAM50A	severe malaria1 anaemia	add	All	0.130675	0.167265	0.434658	1.14(0.82-1.58)	SEHA	291/80/192	29/17/30
Ho_Chi_Minh_City	VietNam	rs915941	153626649	FAM50A	severe malaria1 anaemia	add	All	0.185743	0.391716	0.635373	1.2(0.56-2.59)	SE	91/121/2274	0/3/27
Ibadan	Nigeria	rs915941	153626649	FAM50A	severe malaria1 anaemia	add	All	-0.431589	0.471532	0.360039	0.65(0.26-1.64)	SEHA	2017-12-11	2002-03-02
Kilifi	Kenya	rs915941	153626649	FAM50A	severe malaria1 anaemia	add	All	-0.178757	0.114678	0.119048	0.84(0.67-1.05)	SEHA	1374/997/1444	61/34/61
Kumasi	Ghana	rs915941	153626649	FAM50A	severe malaria1 anaemia	add	All	-0.0372581	0.0659101	0.571879	0.96(0.85-1.1)	SEHA	666/456/760	183/133/227
Madang	PapuaNewGuinea	rs915941	153626649	FAM50A	severe malaria1 anaemia	add	All	-0.36373	0.250119	0.145883	0.7(0.43-1.13)	SE	199/29/14	101/9/5
Moshi	Tanzania	rs915941	153626649	FAM50A	severe malaria1 anaemia	add	All	0.154095	0.119185	0.196044	1.17(0.92-1.47)	SEHA	166/121/168	65/39/73
Noguchi	Ghana	rs915941	153626649	FAM50A	severe malaria1 anaemia	add	All	-0.0852313	0.129206	0.509477	0.92(0.71-1.18)	SEHA	60/58/73	93/34/114
Ougadougou	BurkinaFaso	rs915941	153626649	FAM50A	severe malaria1 anaemia	add	All	0.191949	0.233351	0.410749	1.21(0.77-1.91)	SHA	266/178/272	2019-07-12
All	All	rs915941	153626649	FAM50A	severe malaria1 anaemia	add	All	0.0015793	0.0320931	0.960752	1(0.94-1.07)	SEHA	5659/3511/7342	861/458/836
Bamako	Mali	rs915941	153626649	FAM50A	severe malaria1 anaemia	rec	All	0.234358	0.210582	0.26575	1.26(0.84-1.91)	SEHA	136/70/119	60/41/80
Banjul	Gambia	rs915941	153626649	FAM50A	severe malaria1 anaemia	rec	All	-0.0703515	0.118356	0.55224	0.93(0.74-1.18)	SEHA	1448/794/997	224/101/138
Blantyre	Malawi	rs915941	153626649	FAM50A	severe malaria1 anaemia	rec	All	0.217803	0.215288	0.31169	1.24(0.82-1.9)	SHA	951/595/1012	31/37/60
Buea	Cameroon	rs915941	153626649	FAM50A	severe malaria1 anaemia	rec	All	0.291132	0.314564	0.3547	1.34(0.72-2.48)	SEHA	291/80/192	29/17/30
Ho_Chi_Minh_City	VietNam	rs915941	153626649	FAM50A	severe malaria1 anaemia	rec	All	-0.0668765	0.598704	0.91106	0.94(0.29-3.02)	SE	91/121/2274	0/3/27
Ibadan	Nigeria	rs915941	153626649	FAM50A	severe malaria1 anaemia	rec	All	-0.80452	0.911581	0.377477	0.45(0.07-2.67)	SEHA	2017-12-11	2002-03-02
Kilifi	Kenya	rs915941	153626649	FAM50A	severe malaria1 anaemia	rec	All	-0.236253	0.197968	0.232717	0.79(0.54-1.16)	SEHA	1374/997/1444	61/34/61
Kumasi	Ghana	rs915941	153626649	FAM50A	severe malaria1 anaemia	rec	All	-0.0967961	0.121276	0.424785	0.91(0.72-1.15)	SEHA	666/456/760	183/133/227
Madang	PapuaNewGuinea	rs915941	153626649	FAM50A	severe malaria1 anaemia	rec	All	-0.313712	0.529906	0.55384	0.73(0.26-2.06)	SE	199/29/14	101/9/5
Moshi	Tanzania	rs915941	153626649	FAM50A	severe malaria1 anaemia	rec	All	0.197945	0.217694	0.363202	1.22(0.8-1.87)	SEHA	166/121/168	65/39/73
Noguchi	Ghana	rs915941	153626649	FAM50A	severe malaria1 anaemia	rec	All	0.142016	0.235432	0.546366	1.15(0.73-1.83)	SEHA	60/58/73	93/34/114
Ougadougou	BurkinaFaso	rs915941	153626649	FAM50A	severe malaria1 anaemia	rec	All	0.51354	0.39012	0.188052	1.67(0.78-3.59)	SHA	266/178/272	2019-07-12
All	All	rs915941	153626649	FAM50A	severe malaria1 anaemia	rec	All	0.0229416	0.0595959	0.700273	1.02(0.91-1.15)	SEHA	5659/3511/7342	861/458/836
Bamako	Mali	rs915941	153626649	FAM50A	severe malaria1 anaemia	dom	All	0.398712	0.221667	0.0720664	1.49(0.96-2.3)	SEHA	136/70/119	60/41/80
Banjul	Gambia	rs915941	153626649	FAM50A	severe malaria1 anaemia	dom	All	-0.12082	0.105517	0.252199	0.89(0.72-1.09)	SEHA	1448/794/997	224/101/138
Blantyre	Malawi	rs915941	153626649	FAM50A	severe malaria1 anaemia	dom	All	0.578759	0.230072	0.0118846	1.78(1.14-2.8)	SHA	951/595/1012	31/37/60
Buea	Cameroon	rs915941	153626649	FAM50A	severe malaria1 anaemia	dom	All	0.154626	0.296435	0.601936	1.17(0.65-2.09)	SEHA	291/80/192	29/17/30
Ho_Chi_Minh_City	VietNam	rs915941	153626649	FAM50A	severe malaria1 anaemia	dom	All	14.1514	0.283461	0	1399248.24(802808.66-2438807.32)	SE	91/121/2274	0/3/27
Ibadan	Nigeria	rs915941	153626649	FAM50A	severe malaria1 anaemia	dom	All	-0.589328	0.950554	0.535269	0.55(0.09-3.57)	SEHA	2017-12-11	2002-03-02
Kilifi	Kenya	rs915941	153626649	FAM50A	severe malaria1 anaemia	dom	All	-0.351983	0.211204	0.095602	0.7(0.46-1.06)	SEHA	1374/997/1444	61/34/61
Kumasi	Ghana	rs915941	153626649	FAM50A	severe malaria1 anaemia	dom	All	-0.0276752	0.122335	0.821027	0.97(0.77-1.24)	SEHA	666/456/760	183/133/227
Madang	PapuaNewGuinea	rs915941	153626649	FAM50A	severe malaria1 anaemia	dom	All	-0.620187	0.351668	0.0778062	0.54(0.27-1.07)	SE	199/29/14	101/9/5
Moshi	Tanzania	rs915941	153626649	FAM50A	severe malaria1 anaemia	dom	All	0.324097	0.222778	0.145725	1.38(0.89-2.14)	SEHA	166/121/168	65/39/73
Noguchi	Ghana	rs915941	153626649	FAM50A	severe malaria1 anaemia	dom	All	-0.453673	0.244814	0.0638631	0.64(0.39-1.03)	SEHA	60/58/73	93/34/114
Ougadougou	BurkinaFaso	rs915941	153626649	FAM50A	severe malaria1 anaemia	dom	All	0.0897339	0.419106	0.830463	1.09(0.48-2.49)	SHA	266/178/272	2019-07-12
All	All	rs915941	153626649	FAM50A	severe malaria1 anaemia	dom	All	-0.0166517	0.0584205	0.775619	0.98(0.88-1.1)	SEHA	5659/3511/7342	861/458/836
Bamako	Mali	rs915941	153626649	FAM50A	severe malaria1 anaemia	add	F	0.155189	0.202676	0.443855	1.17(0.79-1.74)	EHA	47/70/41	16/41/22
Banjul	Gambia	rs915941	153626649	FAM50A	severe malaria1 anaemia	add	F	-0.028032	0.108199	0.795574	0.97(0.79-1.2)	EHA	550/794/277	80/101/40
Blantyre	Malawi	rs915941	153626649	FAM50A	severe malaria1 anaemia	add	F	0.326618	0.207072	0.114722	1.39(0.92-2.08)	HA	302/595/327	7/37/19
Buea	Cameroon	rs915941	153626649	FAM50A	severe malaria1 anaemia	add	F	0.29003	0.314074	0.355776	1.34(0.72-2.47)	EHA	52/80/27	11/17/10
Ho_Chi_Minh_City	VietNam	rs915941	153626649	FAM50A	severe malaria1 anaemia	add	F	-0.494942	0.620847	0.425333	0.61(0.18-2.06)	E	3/121/1029	0/3/13
Ibadan	Nigeria	rs915941	153626649	FAM50A	severe malaria1 anaemia	add	F	0.975959	1.34284	0.467356	2.65(0.19-36.89)	EHA	2006-12-04	0/3/1
Kilifi	Kenya	rs915941	153626649	FAM50A	severe malaria1 anaemia	add	F	-0.223622	0.201013	0.265935	0.8(0.54-1.19)	EHA	467/997/458	23/34/15
Kumasi	Ghana	rs915941	153626649	FAM50A	severe malaria1 anaemia	add	F	-0.00526304	0.118077	0.964448	0.99(0.79-1.25)	EHA	243/456/267	58/133/67
Madang	PapuaNewGuinea	rs915941	153626649	FAM50A	severe malaria1 anaemia	add	F	-0.440692	0.405506	0.277138	0.64(0.29-1.42)	E	84/29/0	51/9/1
Moshi	Tanzania	rs915941	153626649	FAM50A	severe malaria1 anaemia	add	F	0.00758352	0.231449	0.973862	1.01(0.64-1.59)	EHA	64/121/65	18/39/14
Noguchi	Ghana	rs915941	153626649	FAM50A	severe malaria1 anaemia	add	F	-0.078645	0.266653	0.768044	0.92(0.55-1.56)	EHA	12/58/17	23/34/33
Ougadougou	BurkinaFaso	rs915941	153626649	FAM50A	severe malaria1 anaemia	add	F	0.2281	0.362262	0.528921	1.26(0.62-2.56)	HA	84/178/83	2008-07-05
All	All	rs915941	153626649	FAM50A	severe malaria1 anaemia	add	F	0.00526996	0.0582269	0.927884	1.01(0.9-1.13)	EHA	1912/3511/2597	292/458/243
Bamako	Mali	rs915941	153626649	FAM50A	severe malaria1 anaemia	rec	F	0.0312489	0.326906	0.923846	1.03(0.54-1.96)	EHA	47/70/41	16/41/22
Banjul	Gambia	rs915941	153626649	FAM50A	severe malaria1 anaemia	rec	F	0.0716811	0.195857	0.714374	1.07(0.73-1.58)	EHA	550/794/277	80/101/40
Blantyre	Malawi	rs915941	153626649	FAM50A	severe malaria1 anaemia	rec	F	0.0565047	0.312388	0.856462	1.06(0.57-1.95)	HA	302/595/327	7/37/19
Buea	Cameroon	rs915941	153626649	FAM50A	severe malaria1 anaemia	rec	F	0.698603	0.542013	0.197431	2.01(0.7-5.82)	EHA	52/80/27	11/17/10
Ho_Chi_Minh_City	VietNam	rs915941	153626649	FAM50A	severe malaria1 anaemia	rec	F	-0.587738	0.655818	0.370151	0.56(0.15-2.01)	E	3/121/1029	0/3/13
Ibadan	Nigeria	rs915941	153626649	FAM50A	severe malaria1 anaemia	rec	F	0.865978	1.60454	0.589399	2.38(0.1-55.19)	EHA	2006-12-04	0/3/1
Kilifi	Kenya	rs915941	153626649	FAM50A	severe malaria1 anaemia	rec	F	-0.17966	0.321448	0.576224	0.84(0.44-1.57)	EHA	467/997/458	23/34/15
Kumasi	Ghana	rs915941	153626649	FAM50A	severe malaria1 anaemia	rec	F	-0.0849801	0.185421	0.646731	0.92(0.64-1.32)	EHA	243/456/267	58/133/67
Madang	PapuaNewGuinea	rs915941	153626649	FAM50A	severe malaria1 anaemia	rec	F	18.2592	3956.18	0.996317	85089624.68(0-Inf)	E	84/29/0	51/9/1
Moshi	Tanzania	rs915941	153626649	FAM50A	severe malaria1 anaemia	rec	F	-0.161994	0.37996	0.669856	0.85(0.4-1.79)	EHA	64/121/65	18/39/14
Noguchi	Ghana	rs915941	153626649	FAM50A	severe malaria1 anaemia	rec	F	0.751632	0.408646	0.0658677	2.12(0.95-4.72)	EHA	12/58/17	23/34/33
Ougadougou	BurkinaFaso	rs915941	153626649	FAM50A	severe malaria1 anaemia	rec	F	0.663151	0.507679	0.191471	1.94(0.72-5.25)	HA	84/178/83	2008-07-05
All	All	rs915941	153626649	FAM50A	severe malaria1 anaemia	rec	F	0.0479384	0.0952361	0.614709	1.05(0.87-1.26)	EHA	1912/3511/2597	292/458/243
Bamako	Mali	rs915941	153626649	FAM50A	severe malaria1 anaemia	dom	F	0.398765	0.344138	0.246564	1.49(0.76-2.92)	EHA	47/70/41	16/41/22
Banjul	Gambia	rs915941	153626649	FAM50A	severe malaria1 anaemia	dom	F	-0.102223	0.154615	0.50852	0.9(0.67-1.22)	EHA	550/794/277	80/101/40
Blantyre	Malawi	rs915941	153626649	FAM50A	severe malaria1 anaemia	dom	F	0.966159	0.423042	0.0223811	2.63(1.15-6.02)	HA	302/595/327	7/37/19
Buea	Cameroon	rs915941	153626649	FAM50A	severe malaria1 anaemia	dom	F	0.126205	0.431776	0.770063	1.13(0.49-2.64)	EHA	52/80/27	11/17/10
Ho_Chi_Minh_City	VietNam	rs915941	153626649	FAM50A	severe malaria1 anaemia	dom	F	12.8203	1335.77	0.992342	369655.73(0-Inf)	E	3/121/1029	0/3/13
Ibadan	Nigeria	rs915941	153626649	FAM50A	severe malaria1 anaemia	dom	F	16.5961	3765.7	0.996484	16128874.54(0-Inf)	EHA	2006-12-04	0/3/1
Kilifi	Kenya	rs915941	153626649	FAM50A	severe malaria1 anaemia	dom	F	-0.343247	0.292604	0.240765	0.71(0.4-1.26)	EHA	467/997/458	23/34/15
Kumasi	Ghana	rs915941	153626649	FAM50A	severe malaria1 anaemia	dom	F	0.080272	0.195533	0.681417	1.08(0.74-1.59)	EHA	243/456/267	58/133/67
Madang	PapuaNewGuinea	rs915941	153626649	FAM50A	severe malaria1 anaemia	dom	F	-0.596779	0.4276	0.162821	0.55(0.24-1.27)	E	84/29/0	51/9/1
Moshi	Tanzania	rs915941	153626649	FAM50A	severe malaria1 anaemia	dom	F	0.153257	0.347748	0.65942	1.17(0.59-2.3)	EHA	64/121/65	18/39/14
Noguchi	Ghana	rs915941	153626649	FAM50A	severe malaria1 anaemia	dom	F	-1.08867	0.450453	0.0156561	0.34(0.14-0.81)	EHA	12/58/17	23/34/33
Ougadougou	BurkinaFaso	rs915941	153626649	FAM50A	severe malaria1 anaemia	dom	F	-0.21945	0.572091	0.70128	0.8(0.26-2.46)	HA	84/178/83	2008-07-05
All	All	rs915941	153626649	FAM50A	severe malaria1 anaemia	dom	F	-0.0292372	0.0888072	0.741989	0.97(0.82-1.16)	EHA	1912/3511/2597	292/458/243
Bamako	Mali	rs915941	153626649	FAM50A	severe malaria1 anaemia	het	F	0.260773	0.285437	0.360932	1.3(0.74-2.27)	EHA	47/70/41	16/41/22
Banjul	Gambia	rs915941	153626649	FAM50A	severe malaria1 anaemia	het	F	-0.130076	0.146528	0.374691	0.88(0.66-1.17)	EHA	550/794/277	80/101/40
Blantyre	Malawi	rs915941	153626649	FAM50A	severe malaria1 anaemia	het	F	0.43423	0.263305	0.0991163	1.54(0.92-2.59)	HA	302/595/327	7/37/19
Buea	Cameroon	rs915941	153626649	FAM50A	severe malaria1 anaemia	het	F	-0.229926	0.383085	0.548376	0.79(0.38-1.68)	EHA	52/80/27	11/17/10
Ho_Chi_Minh_City	VietNam	rs915941	153626649	FAM50A	severe malaria1 anaemia	het	F	0.631408	0.654489	0.334678	1.88(0.52-6.78)	E	3/121/1029	0/3/13
Ibadan	Nigeria	rs915941	153626649	FAM50A	severe malaria1 anaemia	het	F	-0.0814385	1.50879	0.956954	0.92(0.05-17.74)	EHA	2006-12-04	0/3/1
Kilifi	Kenya	rs915941	153626649	FAM50A	severe malaria1 anaemia	het	F	-0.125022	0.244907	0.60971	0.88(0.55-1.43)	EHA	467/997/458	23/34/15
Kumasi	Ghana	rs915941	153626649	FAM50A	severe malaria1 anaemia	het	F	0.112747	0.156235	0.470509	1.12(0.82-1.52)	EHA	243/456/267	58/133/67
Madang	PapuaNewGuinea	rs915941	153626649	FAM50A	severe malaria1 anaemia	het	F	-0.737298	0.442031	0.0953198	0.48(0.2-1.14)	E	84/29/0	51/9/1
Moshi	Tanzania	rs915941	153626649	FAM50A	severe malaria1 anaemia	het	F	0.194409	0.284078	0.493754	1.21(0.7-2.12)	EHA	64/121/65	18/39/14
Noguchi	Ghana	rs915941	153626649	FAM50A	severe malaria1 anaemia	het	F	-1.10866	0.33268	0.000860695	0.33(0.17-0.63)	EHA	12/58/17	23/34/33
Ougadougou	BurkinaFaso	rs915941	153626649	FAM50A	severe malaria1 anaemia	het	F	-0.667137	0.483356	0.16752	0.51(0.2-1.32)	HA	84/178/83	2008-07-05
All	All	rs915941	153626649	FAM50A	severe malaria1 anaemia	het	F	-0.0511419	0.0756275	0.498892	0.95(0.82-1.1)	EHA	1912/3511/2597	292/458/243
Bamako	Mali	rs915941	153626649	FAM50A	severe malaria1 anaemia	dom	M	0.394947	0.294155	0.179386	1.48(0.83-2.64)	EHA	89/0/78	44/0/58
Banjul	Gambia	rs915941	153626649	FAM50A	severe malaria1 anaemia	dom	M	-0.149582	0.144748	0.301421	0.86(0.65-1.14)	EHA	898/0/720	144/0/98
Blantyre	Malawi	rs915941	153626649	FAM50A	severe malaria1 anaemia	dom	M	0.366653	0.295221	0.214251	1.44(0.81-2.57)	HA	649/0/685	24/0/41
Buea	Cameroon	rs915941	153626649	FAM50A	severe malaria1 anaemia	dom	M	0.20196	0.405092	0.618094	1.22(0.55-2.71)	EHA	239/0/165	18/0/20
Ho_Chi_Minh_City	VietNam	rs915941	153626649	FAM50A	severe malaria1 anaemia	dom	M	15.0744	1128.89	0.989346	3521621.12(0-Inf)	E	88/0/1245	0/0/14
Ibadan	Nigeria	rs915941	153626649	FAM50A	severe malaria1 anaemia	dom	M	-18.2944	3796.15	0.996155	0(0-Inf)	HA	7/0/11	2/0/1
Kilifi	Kenya	rs915941	153626649	FAM50A	severe malaria1 anaemia	dom	M	-0.34187	0.280364	0.2227	0.71(0.41-1.23)	EHA	907/0/986	38/0/46
Kumasi	Ghana	rs915941	153626649	FAM50A	severe malaria1 anaemia	dom	M	-0.104966	0.164701	0.523921	0.9(0.65-1.24)	EHA	423/0/493	125/0/160
Madang	PapuaNewGuinea	rs915941	153626649	FAM50A	severe malaria1 anaemia	dom	M	-0.679076	0.653796	0.29896	0.51(0.14-1.83)	E	115/0/14	50/0/4
Moshi	Tanzania	rs915941	153626649	FAM50A	severe malaria1 anaemia	dom	M	0.412093	0.285293	0.14861	1.51(0.86-2.64)	EHA	102/0/103	47/0/59
Noguchi	Ghana	rs915941	153626649	FAM50A	severe malaria1 anaemia	dom	M	-0.207213	0.294276	0.481342	0.81(0.46-1.45)	EHA	48/0/56	70/0/81
Ougadougou	BurkinaFaso	rs915941	153626649	FAM50A	severe malaria1 anaemia	dom	M	0.338684	0.528399	0.521547	1.4(0.5-3.95)	HA	182/0/189	7/0/11
All	All	rs915941	153626649	FAM50A	severe malaria1 anaemia	dom	M	-0.0185613	0.0790205	0.814292	0.98(0.84-1.15)	EHA	3659/0/3500	569/0/579
Bamako	Mali	rs915941	153626649	FAM50A	cerebral malaria and severe malaria1 anaemia	add	All	0.248922	0.170986	0.145447	1.28(0.92-1.79)	SEHA	136/70/119	19/22/28
Banjul	Gambia	rs915941	153626649	FAM50A	cerebral malaria and severe malaria1 anaemia	add	All	-0.012533	0.1017	0.90192	0.99(0.81-1.21)	SEHA	1448/794/997	64/35/38
Blantyre	Malawi	rs915941	153626649	FAM50A	cerebral malaria and severe malaria1 anaemia	add	All	-0.0421868	0.110011	0.701367	0.96(0.77-1.19)	SHA	951/595/1012	53/37/67
Buea	Cameroon	rs915941	153626649	FAM50A	cerebral malaria and severe malaria1 anaemia	add	All	-1.25909	0.596546	0.0348044	0.28(0.09-0.91)	SEHA	291/80/192	2001-01-05
Ho_Chi_Minh_City	VietNam	rs915941	153626649	FAM50A	cerebral malaria and severe malaria1 anaemia	add	All	15.3277	0.402952	0	4536650.17(2059404.68-9993759.36)	SE	91/121/2274	0/0/8
Ibadan	Nigeria	rs915941	153626649	FAM50A	cerebral malaria and severe malaria1 anaemia	add	All	9.23814e-16	0.213523	1	1(0.66-1.52)	SEHA	2017-12-11	0/0/0
Kilifi	Kenya	rs915941	153626649	FAM50A	cerebral malaria and severe malaria1 anaemia	add	All	0.0690665	0.0923294	0.454433	1.07(0.89-1.28)	SEHA	1374/997/1444	72/55/84
Kumasi	Ghana	rs915941	153626649	FAM50A	cerebral malaria and severe malaria1 anaemia	add	All	0.0427813	0.139172	0.758539	1.04(0.79-1.37)	SEHA	666/456/760	25/15/36
Madang	PapuaNewGuinea	rs915941	153626649	FAM50A	cerebral malaria and severe malaria1 anaemia	add	All	1.09785	0.541189	0.0425002	3(1.04-8.66)	SE	199/29/14	2002-01-06
Moshi	Tanzania	rs915941	153626649	FAM50A	cerebral malaria and severe malaria1 anaemia	add	All	0.0872214	0.268921	0.745682	1.09(0.64-1.85)	SEHA	166/121/168	2012-06-10
Noguchi	Ghana	rs915941	153626649	FAM50A	cerebral malaria and severe malaria1 anaemia	add	All	-0.131738	0.399991	0.741889	0.88(0.4-1.92)	SEHA	60/58/73	2006-02-05
Ougadougou	BurkinaFaso	rs915941	153626649	FAM50A	cerebral malaria and severe malaria1 anaemia	add	All	-0.178874	0.281771	0.525547	0.84(0.48-1.45)	SHA	266/178/272	2007-04-08
All	All	rs915941	153626649	FAM50A	cerebral malaria and severe malaria1 anaemia	add	All	0.0278295	0.0487875	0.568391	1.03(0.93-1.13)	SEHA	5568/3390/5068	267/178/281
Bamako	Mali	rs915941	153626649	FAM50A	cerebral malaria and severe malaria1 anaemia	rec	All	0.187498	0.303644	0.536909	1.21(0.67-2.19)	SEHA	136/70/119	19/22/28
Banjul	Gambia	rs915941	153626649	FAM50A	cerebral malaria and severe malaria1 anaemia	rec	All	-0.0935872	0.201634	0.642544	0.91(0.61-1.35)	SEHA	1448/794/997	64/35/38
Blantyre	Malawi	rs915941	153626649	FAM50A	cerebral malaria and severe malaria1 anaemia	rec	All	-0.132312	0.20058	0.509481	0.88(0.59-1.3)	SHA	951/595/1012	53/37/67
Buea	Cameroon	rs915941	153626649	FAM50A	cerebral malaria and severe malaria1 anaemia	rec	All	-1.61517	0.511704	0.00159704	0.2(0.07-0.54)	SEHA	291/80/192	2001-01-05
Ho_Chi_Minh_City	VietNam	rs915941	153626649	FAM50A	cerebral malaria and severe malaria1 anaemia	rec	All	15.9919	0.35852	0	8814766.56(4365536.81-17798523.5)	SE	91/121/2274	0/0/8
Ibadan	Nigeria	rs915941	153626649	FAM50A	cerebral malaria and severe malaria1 anaemia	rec	All	-1.16693e-14	0.373808	1	1(0.48-2.08)	SEHA	2017-12-11	0/0/0
Kilifi	Kenya	rs915941	153626649	FAM50A	cerebral malaria and severe malaria1 anaemia	rec	All	0.108222	0.166937	0.516803	1.11(0.8-1.55)	SEHA	1374/997/1444	72/55/84
Kumasi	Ghana	rs915941	153626649	FAM50A	cerebral malaria and severe malaria1 anaemia	rec	All	-0.0791358	0.266937	0.76688	0.92(0.55-1.56)	SEHA	666/456/760	25/15/36
Madang	PapuaNewGuinea	rs915941	153626649	FAM50A	cerebral malaria and severe malaria1 anaemia	rec	All	2.77307	1.1474	0.015656	16.01(1.69-151.7)	SE	199/29/14	2002-01-06
Moshi	Tanzania	rs915941	153626649	FAM50A	cerebral malaria and severe malaria1 anaemia	rec	All	0.339983	0.463919	0.463651	1.4(0.57-3.49)	SEHA	166/121/168	2012-06-10
Noguchi	Ghana	rs915941	153626649	FAM50A	cerebral malaria and severe malaria1 anaemia	rec	All	0.227476	0.680628	0.738217	1.26(0.33-4.77)	SEHA	60/58/73	2006-02-05
Ougadougou	BurkinaFaso	rs915941	153626649	FAM50A	cerebral malaria and severe malaria1 anaemia	rec	All	-0.212455	0.486019	0.662015	0.81(0.31-2.1)	SHA	266/178/272	2007-04-08
All	All	rs915941	153626649	FAM50A	cerebral malaria and severe malaria1 anaemia	rec	All	0.00634403	0.0898151	0.943689	1.01(0.84-1.2)	SEHA	5568/3390/5068	267/178/281
Bamako	Mali	rs915941	153626649	FAM50A	cerebral malaria and severe malaria1 anaemia	dom	All	0.6678	0.344985	0.0529003	1.95(0.99-3.83)	SEHA	136/70/119	19/22/28
Banjul	Gambia	rs915941	153626649	FAM50A	cerebral malaria and severe malaria1 anaemia	dom	All	0.0357242	0.182781	0.845042	1.04(0.72-1.48)	SEHA	1448/794/997	64/35/38
Blantyre	Malawi	rs915941	153626649	FAM50A	cerebral malaria and severe malaria1 anaemia	dom	All	-0.00612719	0.204261	0.97607	0.99(0.67-1.48)	SHA	951/595/1012	53/37/67
Buea	Cameroon	rs915941	153626649	FAM50A	cerebral malaria and severe malaria1 anaemia	dom	All	-1.80533	1.08019	0.0946622	0.16(0.02-1.37)	SEHA	291/80/192	2001-01-05
Ho_Chi_Minh_City	VietNam	rs915941	153626649	FAM50A	cerebral malaria and severe malaria1 anaemia	dom	All	14.4864	0.843518	4.17569e-66	1955920.23(374409.62-10217750.01)	SE	91/121/2274	0/0/8
Ibadan	Nigeria	rs915941	153626649	FAM50A	cerebral malaria and severe malaria1 anaemia	dom	All	-1.8471e-15	0.405042	1	1(0.45-2.21)	SEHA	2017-12-11	0/0/0
Kilifi	Kenya	rs915941	153626649	FAM50A	cerebral malaria and severe malaria1 anaemia	dom	All	0.120634	0.170001	0.477947	1.13(0.81-1.57)	SEHA	1374/997/1444	72/55/84
Kumasi	Ghana	rs915941	153626649	FAM50A	cerebral malaria and severe malaria1 anaemia	dom	All	0.241384	0.276205	0.382155	1.27(0.74-2.19)	SEHA	666/456/760	25/15/36
Madang	PapuaNewGuinea	rs915941	153626649	FAM50A	cerebral malaria and severe malaria1 anaemia	dom	All	1.18652	0.914033	0.194246	3.28(0.55-19.65)	SE	199/29/14	2002-01-06
Moshi	Tanzania	rs915941	153626649	FAM50A	cerebral malaria and severe malaria1 anaemia	dom	All	-0.067001	0.472077	0.887137	0.94(0.37-2.36)	SEHA	166/121/168	2012-06-10
Noguchi	Ghana	rs915941	153626649	FAM50A	cerebral malaria and severe malaria1 anaemia	dom	All	-0.688204	0.71451	0.335456	0.5(0.12-2.04)	SEHA	60/58/73	2006-02-05
Ougadougou	BurkinaFaso	rs915941	153626649	FAM50A	cerebral malaria and severe malaria1 anaemia	dom	All	-0.381128	0.53138	0.473225	0.68(0.24-1.94)	SHA	266/178/272	2007-04-08
All	All	rs915941	153626649	FAM50A	cerebral malaria and severe malaria1 anaemia	dom	All	0.0865774	0.0907067	0.339843	1.09(0.91-1.3)	SEHA	5568/3390/5068	267/178/281
Bamako	Mali	rs915941	153626649	FAM50A	cerebral malaria and severe malaria1 anaemia	add	F	0.122723	0.29071	0.672915	1.13(0.64-2)	EHA	47/70/41	7/22/7
Banjul	Gambia	rs915941	153626649	FAM50A	cerebral malaria and severe malaria1 anaemia	add	F	0.0253635	0.19222	0.895023	1.03(0.7-1.49)	EHA	550/794/277	21/35/8
Blantyre	Malawi	rs915941	153626649	FAM50A	cerebral malaria and severe malaria1 anaemia	add	F	-0.0555544	0.198112	0.779156	0.95(0.64-1.39)	HA	302/595/327	16/37/17
Buea	Cameroon	rs915941	153626649	FAM50A	cerebral malaria and severe malaria1 anaemia	add	F	-1.41689	1.12213	0.206702	0.24(0.03-2.19)	EHA	52/80/27	2000-01-03
Ho_Chi_Minh_City	VietNam	rs915941	153626649	FAM50A	cerebral malaria and severe malaria1 anaemia	add	F	15.4671	1541.52	0.991994	5215390.12(0-Inf)	E	3/121/1029	0/0/7
Ibadan	Nigeria	rs915941	153626649	FAM50A	cerebral malaria and severe malaria1 anaemia	add	F	5.96225e-15	81788.8	1	1(0-Inf)	EHA	2006-12-04	0/0/0
Kilifi	Kenya	rs915941	153626649	FAM50A	cerebral malaria and severe malaria1 anaemia	add	F	0.216511	0.158343	0.171514	1.24(0.91-1.69)	EHA	467/997/458	23/55/27
Kumasi	Ghana	rs915941	153626649	FAM50A	cerebral malaria and severe malaria1 anaemia	add	F	0.030456	0.325798	0.925521	1.03(0.54-1.95)	EHA	243/456/267	4/15/7
Madang	PapuaNewGuinea	rs915941	153626649	FAM50A	cerebral malaria and severe malaria1 anaemia	add	F	-0.174444	1.25185	0.889174	0.84(0.07-9.77)	E	84/29/0	2000-01-04
Moshi	Tanzania	rs915941	153626649	FAM50A	cerebral malaria and severe malaria1 anaemia	add	F	0.377429	0.445919	0.397326	1.46(0.61-3.5)	EHA	64/121/65	2005-06-04
Noguchi	Ghana	rs915941	153626649	FAM50A	cerebral malaria and severe malaria1 anaemia	add	F	0.158251	0.76202	0.835484	1.17(0.26-5.22)	EHA	12/58/17	2002-02-02
Ougadougou	BurkinaFaso	rs915941	153626649	FAM50A	cerebral malaria and severe malaria1 anaemia	add	F	-0.440302	0.561195	0.4327	0.64(0.21-1.93)	HA	84/178/83	2002-04-03
All	All	rs915941	153626649	FAM50A	cerebral malaria and severe malaria1 anaemia	add	F	0.0607403	0.0888611	0.494264	1.06(0.89-1.26)	EHA	1909/3390/1568	87/178/75
Bamako	Mali	rs915941	153626649	FAM50A	cerebral malaria and severe malaria1 anaemia	rec	F	-0.29106	0.490257	0.55272	0.75(0.29-1.95)	EHA	47/70/41	7/22/7
Banjul	Gambia	rs915941	153626649	FAM50A	cerebral malaria and severe malaria1 anaemia	rec	F	-0.192923	0.390126	0.620943	0.82(0.38-1.77)	EHA	550/794/277	21/35/8
Blantyre	Malawi	rs915941	153626649	FAM50A	cerebral malaria and severe malaria1 anaemia	rec	F	-0.21297	0.314531	0.49834	0.81(0.44-1.5)	HA	302/595/327	16/37/17
Buea	Cameroon	rs915941	153626649	FAM50A	cerebral malaria and severe malaria1 anaemia	rec	F	-16.9085	4846.37	0.997216	0(0-Inf)	EHA	52/80/27	2000-01-03
Ho_Chi_Minh_City	VietNam	rs915941	153626649	FAM50A	cerebral malaria and severe malaria1 anaemia	rec	F	15.5237	1571.76	0.99212	5518852.03(0-Inf)	E	3/121/1029	0/0/7
Ibadan	Nigeria	rs915941	153626649	FAM50A	cerebral malaria and severe malaria1 anaemia	rec	F	-2.94816e-15	118009	1	1(0-Inf)	EHA	2006-12-04	0/0/0
Kilifi	Kenya	rs915941	153626649	FAM50A	cerebral malaria and severe malaria1 anaemia	rec	F	0.239157	0.244908	0.328809	1.27(0.79-2.05)	EHA	467/997/458	23/55/27
Kumasi	Ghana	rs915941	153626649	FAM50A	cerebral malaria and severe malaria1 anaemia	rec	F	-0.566599	0.583318	0.33138	0.57(0.18-1.78)	EHA	243/456/267	4/15/7
Madang	PapuaNewGuinea	rs915941	153626649	FAM50A	cerebral malaria and severe malaria1 anaemia	rec	F	NA	NA	NA	NA(NA-NA)	E	84/29/0	2000-01-04
Moshi	Tanzania	rs915941	153626649	FAM50A	cerebral malaria and severe malaria1 anaemia	rec	F	0.900396	0.664436	0.175376	2.46(0.67-9.05)	EHA	64/121/65	2005-06-04
Noguchi	Ghana	rs915941	153626649	FAM50A	cerebral malaria and severe malaria1 anaemia	rec	F	1.31917	1.05547	0.211357	3.74(0.47-29.6)	EHA	12/58/17	2002-02-02
Ougadougou	BurkinaFaso	rs915941	153626649	FAM50A	cerebral malaria and severe malaria1 anaemia	rec	F	-0.319144	0.879646	0.716747	0.73(0.13-4.08)	HA	84/178/83	2002-04-03
All	All	rs915941	153626649	FAM50A	cerebral malaria and severe malaria1 anaemia	rec	F	-0.026796	0.147052	0.855409	0.97(0.73-1.3)	EHA	1909/3390/1568	87/178/75
Bamako	Mali	rs915941	153626649	FAM50A	cerebral malaria and severe malaria1 anaemia	dom	F	0.646741	0.514183	0.208463	1.91(0.7-5.23)	EHA	47/70/41	7/22/7
Banjul	Gambia	rs915941	153626649	FAM50A	cerebral malaria and severe malaria1 anaemia	dom	F	0.153816	0.277728	0.579689	1.17(0.68-2.01)	EHA	550/794/277	21/35/8
Blantyre	Malawi	rs915941	153626649	FAM50A	cerebral malaria and severe malaria1 anaemia	dom	F	0.0807647	0.316683	0.798697	1.08(0.58-2.02)	HA	302/595/327	16/37/17
Buea	Cameroon	rs915941	153626649	FAM50A	cerebral malaria and severe malaria1 anaemia	dom	F	-1.47468	1.17373	0.208968	0.23(0.02-2.28)	EHA	52/80/27	2000-01-03
Ho_Chi_Minh_City	VietNam	rs915941	153626649	FAM50A	cerebral malaria and severe malaria1 anaemia	dom	F	14.002	5856.08	0.998092	1205060.12(0-Inf)	E	3/121/1029	0/0/7
Ibadan	Nigeria	rs915941	153626649	FAM50A	cerebral malaria and severe malaria1 anaemia	dom	F	6.08557e-15	143878	1	1(0-Inf)	EHA	2006-12-04	0/0/0
Kilifi	Kenya	rs915941	153626649	FAM50A	cerebral malaria and severe malaria1 anaemia	dom	F	0.304174	0.260272	0.242535	1.36(0.81-2.26)	EHA	467/997/458	23/55/27
Kumasi	Ghana	rs915941	153626649	FAM50A	cerebral malaria and severe malaria1 anaemia	dom	F	0.752281	0.647413	0.245244	2.12(0.6-7.55)	EHA	243/456/267	4/15/7
Madang	PapuaNewGuinea	rs915941	153626649	FAM50A	cerebral malaria and severe malaria1 anaemia	dom	F	-0.174444	1.25185	0.889174	0.84(0.07-9.77)	E	84/29/0	2000-01-04
Moshi	Tanzania	rs915941	153626649	FAM50A	cerebral malaria and severe malaria1 anaemia	dom	F	0.0137995	0.658204	0.983273	1.01(0.28-3.68)	EHA	64/121/65	2005-06-04
Noguchi	Ghana	rs915941	153626649	FAM50A	cerebral malaria and severe malaria1 anaemia	dom	F	-0.833433	0.984724	0.397351	0.43(0.06-2.99)	EHA	12/58/17	2002-02-02
Ougadougou	BurkinaFaso	rs915941	153626649	FAM50A	cerebral malaria and severe malaria1 anaemia	dom	F	-0.691761	0.794571	0.383967	0.5(0.11-2.38)	HA	84/178/83	2002-04-03
All	All	rs915941	153626649	FAM50A	cerebral malaria and severe malaria1 anaemia	dom	F	0.169539	0.139642	0.224709	1.18(0.9-1.56)	EHA	1909/3390/1568	87/178/75
Bamako	Mali	rs915941	153626649	FAM50A	cerebral malaria and severe malaria1 anaemia	het	F	0.638024	0.406414	0.116441	1.89(0.85-4.2)	EHA	47/70/41	7/22/7
Banjul	Gambia	rs915941	153626649	FAM50A	cerebral malaria and severe malaria1 anaemia	het	F	0.227771	0.260025	0.381053	1.26(0.75-2.09)	EHA	550/794/277	21/35/8
Blantyre	Malawi	rs915941	153626649	FAM50A	cerebral malaria and severe malaria1 anaemia	het	F	0.185383	0.246748	0.452469	1.2(0.74-1.95)	HA	302/595/327	16/37/17
Buea	Cameroon	rs915941	153626649	FAM50A	cerebral malaria and severe malaria1 anaemia	het	F	-1.15743	1.17433	0.324322	0.31(0.03-3.14)	EHA	52/80/27	2000-01-03
Ho_Chi_Minh_City	VietNam	rs915941	153626649	FAM50A	cerebral malaria and severe malaria1 anaemia	het	F	-15.5304	1592.71	0.99222	0(0-Inf)	E	3/121/1029	0/0/7
Ibadan	Nigeria	rs915941	153626649	FAM50A	cerebral malaria and severe malaria1 anaemia	het	F	-2.17562e-15	104979	1	1(0-Inf)	EHA	2006-12-04	0/0/0
Kilifi	Kenya	rs915941	153626649	FAM50A	cerebral malaria and severe malaria1 anaemia	het	F	0.0371117	0.204416	0.855936	1.04(0.7-1.55)	EHA	467/997/458	23/55/27
Kumasi	Ghana	rs915941	153626649	FAM50A	cerebral malaria and severe malaria1 anaemia	het	F	0.835973	0.469782	0.0751592	2.31(0.92-5.79)	EHA	243/456/267	4/15/7
Madang	PapuaNewGuinea	rs915941	153626649	FAM50A	cerebral malaria and severe malaria1 anaemia	het	F	-0.174444	1.25185	0.889174	0.84(0.07-9.77)	E	84/29/0	2000-01-04
Moshi	Tanzania	rs915941	153626649	FAM50A	cerebral malaria and severe malaria1 anaemia	het	F	-0.556757	0.558365	0.318706	0.57(0.19-1.71)	EHA	64/121/65	2005-06-04
Noguchi	Ghana	rs915941	153626649	FAM50A	cerebral malaria and severe malaria1 anaemia	het	F	-1.50667	0.94643	0.111396	0.22(0.03-1.42)	EHA	12/58/17	2002-02-02
Ougadougou	BurkinaFaso	rs915941	153626649	FAM50A	cerebral malaria and severe malaria1 anaemia	het	F	-0.267431	0.681811	0.694883	0.77(0.2-2.91)	HA	84/178/83	2002-04-03
All	All	rs915941	153626649	FAM50A	cerebral malaria and severe malaria1 anaemia	het	F	0.134872	0.115385	0.24245	1.14(0.91-1.43)	EHA	1909/3390/1568	87/178/75
Bamako	Mali	rs915941	153626649	FAM50A	cerebral malaria and severe malaria1 anaemia	dom	M	0.896673	0.465266	0.0539512	2.45(0.98-6.1)	EHA	89/0/78	12/0/21
Banjul	Gambia	rs915941	153626649	FAM50A	cerebral malaria and severe malaria1 anaemia	dom	M	-0.0514117	0.254009	0.839603	0.95(0.58-1.56)	EHA	898/0/720	43/0/30
Blantyre	Malawi	rs915941	153626649	FAM50A	cerebral malaria and severe malaria1 anaemia	dom	M	-0.0657962	0.266434	0.804946	0.94(0.56-1.58)	HA	649/0/685	37/0/50
Buea	Cameroon	rs915941	153626649	FAM50A	cerebral malaria and severe malaria1 anaemia	dom	M	-1.67549	1.94806	0.389744	0.19(0-8.52)	EHA	239/0/165	2/0/1
Ho_Chi_Minh_City	VietNam	rs915941	153626649	FAM50A	cerebral malaria and severe malaria1 anaemia	dom	M	15.377	5063.81	0.997577	4765989.33(0-Inf)	E	88/0/1245	0/0/1
Ibadan	Nigeria	rs915941	153626649	FAM50A	cerebral malaria and severe malaria1 anaemia	dom	M	4.81303e-15	111957	1	1(0-Inf)	HA	7/0/11	0/0/0
Kilifi	Kenya	rs915941	153626649	FAM50A	cerebral malaria and severe malaria1 anaemia	dom	M	-0.0300554	0.231147	0.896545	0.97(0.62-1.53)	EHA	907/0/986	49/0/57
Kumasi	Ghana	rs915941	153626649	FAM50A	cerebral malaria and severe malaria1 anaemia	dom	M	0.0792771	0.336796	0.813909	1.08(0.56-2.09)	EHA	423/0/493	21/0/29
Madang	PapuaNewGuinea	rs915941	153626649	FAM50A	cerebral malaria and severe malaria1 anaemia	dom	M	2.67415	1.26286	0.0342153	14.5(1.22-172.31)	E	115/0/14	2/0/2
Moshi	Tanzania	rs915941	153626649	FAM50A	cerebral malaria and severe malaria1 anaemia	dom	M	-0.159431	0.75459	0.832667	0.85(0.19-3.74)	EHA	102/0/103	6/0/7
Noguchi	Ghana	rs915941	153626649	FAM50A	cerebral malaria and severe malaria1 anaemia	dom	M	-0.551062	1.05085	0.600002	0.58(0.07-4.52)	EHA	48/0/56	3/0/4
Ougadougou	BurkinaFaso	rs915941	153626649	FAM50A	cerebral malaria and severe malaria1 anaemia	dom	M	-0.14551	0.7026	0.83593	0.86(0.22-3.43)	HA	182/0/189	5/0/5
All	All	rs915941	153626649	FAM50A	cerebral malaria and severe malaria1 anaemia	dom	M	0.0321514	0.120976	0.79042	1.03(0.81-1.31)	EHA	3659/0/3500	180/0/206
Bamako	Mali	rs915941	153626649	FAM50A	other severe malaria	add	All	0.12681	0.133684	0.342833	1.14(0.87-1.48)	SEHA	136/70/119	43/21/43
Banjul	Gambia	rs915941	153626649	FAM50A	other severe malaria	add	All	-0.0940216	0.0433859	0.0302273	0.91(0.84-0.99)	SEHA	1448/794/997	547/220/297
Blantyre	Malawi	rs915941	153626649	FAM50A	other severe malaria	add	All	0.108983	0.0885576	0.218457	1.12(0.94-1.33)	SHA	951/595/1012	71/58/90
Buea	Cameroon	rs915941	153626649	FAM50A	other severe malaria	add	All	-0.030282	0.0810535	0.708699	0.97(0.83-1.14)	SEHA	291/80/192	228/104/142
Ho_Chi_Minh_City	VietNam	rs915941	153626649	FAM50A	other severe malaria	add	All	-0.0809459	0.102213	0.428399	0.92(0.75-1.13)	SE	91/121/2274	31/16/498
Ibadan	Nigeria	rs915941	153626649	FAM50A	other severe malaria	add	All	-0.49718	0.276684	0.0723478	0.61(0.35-1.05)	SEHA	2017-12-11	38/9/17
Kilifi	Kenya	rs915941	153626649	FAM50A	other severe malaria	add	All	-0.00929189	0.0476615	0.845428	0.99(0.9-1.09)	SEHA	1374/997/1444	360/232/371
Kumasi	Ghana	rs915941	153626649	FAM50A	other severe malaria	add	All	-0.140005	0.059544	0.0187091	0.87(0.77-0.98)	SEHA	666/456/760	259/130/238
Madang	PapuaNewGuinea	rs915941	153626649	FAM50A	other severe malaria	add	All	-0.215636	0.186893	0.248584	0.81(0.56-1.16)	SE	199/29/14	184/18/10
Moshi	Tanzania	rs915941	153626649	FAM50A	other severe malaria	add	All	0.0729547	0.115893	0.52902	1.08(0.86-1.35)	SEHA	166/121/168	68/50/68
Noguchi	Ghana	rs915941	153626649	FAM50A	other severe malaria	add	All	-0.00140465	0.116178	0.990353	1(0.8-1.25)	SEHA	60/58/73	123/101/156
Ougadougou	BurkinaFaso	rs915941	153626649	FAM50A	other severe malaria	add	All	0.067144	0.0664222	0.31208	1.07(0.94-1.22)	SHA	266/178/272	248/132/293
All	All	rs915941	153626649	FAM50A	other severe malaria	add	All	-0.0390047	0.0218402	0.0741135	0.96(0.92-1)	SEHA	5659/3511/7342	2200/1091/2223
Bamako	Mali	rs915941	153626649	FAM50A	other severe malaria	rec	All	0.218303	0.246247	0.375338	1.24(0.77-2.02)	SEHA	136/70/119	43/21/43
Banjul	Gambia	rs915941	153626649	FAM50A	other severe malaria	rec	All	-0.114772	0.0851083	0.177486	0.89(0.75-1.05)	SEHA	1448/794/997	547/220/297
Blantyre	Malawi	rs915941	153626649	FAM50A	other severe malaria	rec	All	0.0965572	0.166672	0.562371	1.1(0.79-1.53)	SHA	951/595/1012	71/58/90
Buea	Cameroon	rs915941	153626649	FAM50A	other severe malaria	rec	All	-0.0300126	0.159886	0.851102	0.97(0.71-1.33)	SEHA	291/80/192	228/104/142
Ho_Chi_Minh_City	VietNam	rs915941	153626649	FAM50A	other severe malaria	rec	All	-0.138082	0.173374	0.425778	0.87(0.62-1.22)	SE	91/121/2274	31/16/498
Ibadan	Nigeria	rs915941	153626649	FAM50A	other severe malaria	rec	All	-0.614481	0.503929	0.2227	0.54(0.2-1.45)	SEHA	2017-12-11	38/9/17
Kilifi	Kenya	rs915941	153626649	FAM50A	other severe malaria	rec	All	0.0080207	0.0865613	0.926174	1.01(0.85-1.19)	SEHA	1374/997/1444	360/232/371
Kumasi	Ghana	rs915941	153626649	FAM50A	other severe malaria	rec	All	-0.202501	0.109324	0.0639825	0.82(0.66-1.01)	SEHA	666/456/760	259/130/238
Madang	PapuaNewGuinea	rs915941	153626649	FAM50A	other severe malaria	rec	All	-0.362654	0.438032	0.407718	0.7(0.29-1.64)	SE	199/29/14	184/18/10
Moshi	Tanzania	rs915941	153626649	FAM50A	other severe malaria	rec	All	0.0935108	0.211997	0.659144	1.1(0.72-1.66)	SEHA	166/121/168	68/50/68
[truncated: 31,281 more rows]
