# Supplementary material for: Characterisation of the opposing effects of G6PD deficiency on cerebral malaria and severe malarial anaemia
Source: eLife. 2017 Jan 9;6:e15085. doi: 10.7554/eLife.15085 (PMC5222559; doi:10.7554/eLife.15085)
Supplement: Figure 2—source data 1. — DOI: http://dx.doi.org/10.7554/eLife.15085.015 [file elife-15085-fig2-data1.csv]

site	sort.code	xlab	sample	ctref	ctlct.pretty	pheno.x	casect.pretty.x	OR95CI.pretty.x	correctp.x	pheno.y	casect.pretty.y	OR95CI.pretty.y	correctp.y	pheno	casect.pretty	OR95CI.pretty	correctp
Banjul	1	Gambia	All	ZERO	1883(57.4)	SM	1517(60.5)	-	8.80e-03	CMonly	510(62.6)	-	2.29e-04	SMAonly	260(55.3)	-	0.48
Banjul	1	Gambia	All	LOW	858(26.2)	SM	683(27.3)	1.01(0.89-1.14)	0.92	CMonly	223(27.4)	0.97(0.81-1.17)	0.77	SMAonly	128(27.2)	1.11(0.88-1.4)	0.39
Banjul	1	Gambia	All	MEDIUM	310(9.4)	SM	175(7)	0.74(0.6-0.92)	6.86e-03	CMonly	48(5.9)	0.58(0.41-0.82)	1.82e-03	SMAonly	42(8.9)	1.06(0.73-1.54)	0.77
Banjul	1	Gambia	All	HIGH	205(6.2)	SM	116(4.6)	0.75(0.58-0.96)	0.02	CMonly	33(4)	0.62(0.42-0.92)	0.02	SMAonly	33(7)	1.21(0.81-1.81)	0.35
Banjul	1	Gambia	All	VERY HIGH	25(0.8)	SM	15(0.6)	0.8(0.41-1.58)	0.52	CMonly	1(0.1)	0.16(0.02-1.17)	0.07	SMAonly	7(1.5)	2.07(0.86-4.97)	0.11
Bamako	2	Mali	All	ZERO	150(45.7)	SM	205(47)	-	0.72	CMonly	44(56.4)	-	0.23	SMAonly	79(43.4)	-	0.65
Bamako	2	Mali	All	LOW	96(29.3)	SM	122(28)	0.97(0.68-1.39)	0.87	CMonly	24(30.8)	0.85(0.46-1.55)	0.59	SMAonly	49(26.9)	1.03(0.65-1.66)	0.89
Bamako	2	Mali	All	MEDIUM	46(14)	SM	57(13.1)	1(0.6-1.65)	1	CMonly	5(6.4)	0.41(0.14-1.2)	0.1	SMAonly	26(14.3)	1.23(0.64-2.36)	0.53
Bamako	2	Mali	All	HIGH	35(10.7)	SM	52(11.9)	0.95(0.58-1.55)	0.84	CMonly	5(6.4)	0.46(0.15-1.39)	0.17	SMAonly	28(15.4)	1.34(0.75-2.4)	0.33
Bamako	2	Mali	All	VERY HIGH	1(0.3)	SM	0(0)	n.c	n.c.	CMonly	0(0)	n.c	n.c.	SMAonly	0(0)	n.c	n.c.
Ougadougou	3	Burkina Faso	All	ZERO	328(45.5)	SM	385(45.5)	-	0.45	CMonly	46(43)	-	0.08	SMAonly	16(42.1)	-	0.5
Ougadougou	3	Burkina Faso	All	LOW	242(33.6)	SM	260(30.7)	0.98(0.78-1.24)	0.86	CMonly	34(31.8)	1.15(0.7-1.9)	0.57	SMAonly	11(28.9)	0.89(0.39-2.05)	0.79
Ougadougou	3	Burkina Faso	All	MEDIUM	91(12.6)	SM	118(13.9)	1.28(0.9-1.81)	0.16	CMonly	21(19.6)	2.22(1.11-4.46)	0.02	SMAonly	5(13.2)	0.89(0.28-2.77)	0.83
Ougadougou	3	Burkina Faso	All	HIGH	60(8.3)	SM	82(9.7)	1.09(0.75-1.59)	0.64	CMonly	6(5.6)	0.64(0.26-1.6)	0.34	SMAonly	6(15.8)	2.08(0.77-5.65)	0.15
Ougadougou	3	Burkina Faso	All	VERY HIGH	0(0)	SM	1(0.1)	206240.8(28835.44-1475103.95)	3.50e-34	CMonly	0(0)	n.c	n.c.	SMAonly	0(0)	n.c	n.c.
Noguchi	4	Ghana (Navrongo)	All	ZERO	89(45.2)	SM	291(43.6)	-	0.15	CMonly	11(52.4)	-	0.54	SMAonly	111(45.5)	-	0.02
Noguchi	4	Ghana (Navrongo)	All	LOW	60(30.5)	SM	189(28.3)	0.94(0.64-1.38)	0.75	CMonly	5(23.8)	0.43(0.12-1.55)	0.2	SMAonly	62(25.4)	0.85(0.52-1.38)	0.51
Noguchi	4	Ghana (Navrongo)	All	MEDIUM	32(16.2)	SM	89(13.3)	0.8(0.47-1.37)	0.42	CMonly	3(14.3)	0.4(0.08-1.92)	0.25	SMAonly	26(10.7)	0.71(0.36-1.41)	0.33
Noguchi	4	Ghana (Navrongo)	All	HIGH	16(8.1)	SM	98(14.7)	1.89(1.06-3.38)	0.03	CMonly	2(9.5)	1.1(0.24-5.11)	0.9	SMAonly	45(18.4)	2.33(1.21-4.5)	1.16e-02
Noguchi	4	Ghana (Navrongo)	All	VERY HIGH	0(0)	SM	1(0.1)	174508.3(23655.33-1287369.36)	2.49e-32	CMonly	0(0)	n.c	n.c.	SMAonly	0(0)	n.c	n.c.
Kumasi	5	Ghana (Kumasi)	All	ZERO	906(44.7)	SM	664(44.6)	-	0.95	CMonly	115(50)	-	0.49	SMAonly	238(43.4)	-	0.39
Kumasi	5	Ghana (Kumasi)	All	LOW	587(29)	SM	420(28.2)	1.03(0.87-1.23)	0.72	CMonly	67(29.1)	0.88(0.62-1.25)	0.48	SMAonly	145(26.5)	1.05(0.82-1.36)	0.68
Kumasi	5	Ghana (Kumasi)	All	MEDIUM	311(15.3)	SM	217(14.6)	1.06(0.83-1.34)	0.65	CMonly	28(12.2)	0.69(0.42-1.16)	0.16	SMAonly	81(14.8)	1.18(0.84-1.66)	0.34
Kumasi	5	Ghana (Kumasi)	All	HIGH	222(11)	SM	187(12.6)	1.1(0.87-1.39)	0.44	CMonly	20(8.7)	0.72(0.42-1.23)	0.23	SMAonly	84(15.3)	1.34(0.96-1.87)	0.08
Kumasi	5	Ghana (Kumasi)	All	VERY HIGH	1(0)	SM	1(0.1)	0.91(0.09-9.21)	0.94	CMonly	0(0)	n.c	n.c.	SMAonly	0(0)	n.c	n.c.
Ibadan	6	Nigeria	All	ZERO	13(32.5)	SM	48(62.3)	-	6.59e-03	CMonly	3(50)	-	0.41	SMAonly	4(57.1)	-	0.09
Ibadan	6	Nigeria	All	LOW	9(22.5)	SM	15(19.5)	0.38(0.12-1.22)	0.1	CMonly	2(33.3)	0.52(0.07-3.95)	0.53	SMAonly	0(0)	n.c	n.c.
Ibadan	6	Nigeria	All	MEDIUM	13(32.5)	SM	7(9.1)	0.1(0.02-0.46)	2.96e-03	CMonly	1(16.7)	0.47(0.02-10.55)	0.63	SMAonly	1(14.3)	0.14(0.01-1.63)	0.12
Ibadan	6	Nigeria	All	HIGH	5(12.5)	SM	7(9.1)	0.28(0.07-1.13)	0.07	CMonly	0(0)	n.c	n.c.	SMAonly	2(28.6)	2.15(0.15-30.49)	0.57
Ibadan	6	Nigeria	All	VERY HIGH	0(0)	SM	0(0)	n.c	n.c.	CMonly	0(0)	n.c	n.c.	SMAonly	0(0)	n.c	n.c.
Buea	7	Cameroon	All	ZERO	345(59.9)	SM	326(52.4)	-	0.45	CMonly	22(56.4)	-	0.43	SMAonly	31(37.8)	-	7.17e-03
Buea	7	Cameroon	All	LOW	155(26.9)	SM	199(32)	1.19(0.9-1.57)	0.22	CMonly	14(35.9)	1.22(0.6-2.48)	0.57	SMAonly	32(39)	1.98(1.14-3.44)	0.02
Buea	7	Cameroon	All	MEDIUM	25(4.3)	SM	49(7.9)	1.04(0.6-1.82)	0.88	CMonly	1(2.6)	0.28(0.03-2.32)	0.24	SMAonly	8(9.8)	1.63(0.63-4.21)	0.31
Buea	7	Cameroon	All	HIGH	51(8.9)	SM	48(7.7)	1.33(0.85-2.08)	0.22	CMonly	2(5.1)	0.84(0.19-3.8)	0.82	SMAonly	11(13.4)	3.65(1.64-8.16)	1.57e-03
Buea	7	Cameroon	All	VERY HIGH	0(0)	SM	0(0)	n.c	n.c.	CMonly	0(0)	n.c	n.c.	SMAonly	0(0)	n.c	n.c.
Kilifi	8	Kenya	All	ZERO	1857(47.2)	SM	1053(46.9)	-	0.07	CMonly	428(47.5)	-	0.66	SMAonly	68(43)	-	0.04
Kilifi	8	Kenya	All	LOW	1000(25.4)	SM	609(27.1)	1.07(0.94-1.22)	0.32	CMonly	246(27.3)	1.08(0.9-1.29)	0.44	SMAonly	39(24.7)	1.09(0.72-1.65)	0.69
Kilifi	8	Kenya	All	MEDIUM	634(16.1)	SM	312(13.9)	0.86(0.72-1.03)	0.1	CMonly	135(15)	0.93(0.73-1.19)	0.56	SMAonly	20(12.7)	0.83(0.46-1.47)	0.51
Kilifi	8	Kenya	All	HIGH	443(11.3)	SM	270(12)	1.13(0.95-1.35)	0.16	CMonly	92(10.2)	0.95(0.74-1.23)	0.69	SMAonly	31(19.6)	2.04(1.31-3.17)	1.57e-03
Kilifi	8	Kenya	All	VERY HIGH	1(0)	SM	0(0)	n.c	n.c.	CMonly	0(0)	n.c	n.c.	SMAonly	0(0)	n.c	n.c.
Moshi	9	Tanzania	All	ZERO	217(47.7)	SM	238(55.7)	-	0.02	CMonly	19(55.9)	-	0.68	SMAonly	111(62)	-	3.98e-03
Moshi	9	Tanzania	All	LOW	102(22.4)	SM	96(22.5)	0.83(0.58-1.17)	0.28	CMonly	6(17.6)	0.6(0.22-1.64)	0.32	SMAonly	36(20.1)	0.69(0.44-1.1)	0.12
Moshi	9	Tanzania	All	MEDIUM	86(18.9)	SM	49(11.5)	0.5(0.31-0.79)	2.78e-03	CMonly	5(14.7)	0.59(0.19-1.85)	0.37	SMAonly	13(7.3)	0.31(0.15-0.61)	7.80e-04
Moshi	9	Tanzania	All	HIGH	50(11)	SM	44(10.3)	0.78(0.49-1.25)	0.3	CMonly	4(11.8)	0.88(0.28-2.79)	0.83	SMAonly	19(10.6)	0.75(0.41-1.37)	0.35
Moshi	9	Tanzania	All	VERY HIGH	0(0)	SM	0(0)	n.c	n.c.	CMonly	0(0)	n.c	n.c.	SMAonly	0(0)	n.c	n.c.
Blantyre	10	Malawi	All	ZERO	1273(49.3)	SM	659(47.8)	-	0.63	CMonly	438(50.1)	-	0.41	SMAonly	52(40.3)	-	0.17
Blantyre	10	Malawi	All	LOW	595(23)	SM	336(24.3)	1.11(0.94-1.32)	0.22	CMonly	216(24.7)	1.06(0.87-1.29)	0.54	SMAonly	31(24)	1.31(0.83-2.07)	0.25
Blantyre	10	Malawi	All	MEDIUM	397(15.4)	SM	211(15.3)	1.02(0.82-1.26)	0.88	CMonly	127(14.5)	0.89(0.69-1.15)	0.38	SMAonly	24(18.6)	1.49(0.85-2.62)	0.16
Blantyre	10	Malawi	All	HIGH	317(12.3)	SM	174(12.6)	1.07(0.86-1.32)	0.55	CMonly	94(10.7)	0.88(0.68-1.13)	0.31	SMAonly	22(17.1)	1.7(1.01-2.87)	0.05
Blantyre	10	Malawi	All	VERY HIGH	0(0)	SM	0(0)	n.c	n.c.	CMonly	0(0)	n.c	n.c.	SMAonly	0(0)	n.c	n.c.
Ho_Chi_Minh_City	11	Vietnam	All	ZERO	2439(97.4)	SM	774(97.6)	-	0.96	CMonly	207(99)	-	0.69	SMAonly	28(90.3)	-	0.16
Ho_Chi_Minh_City	11	Vietnam	All	LOW	0(0)	SM	0(0)	n.c	n.c.	CMonly	0(0)	n.c	n.c.	SMAonly	0(0)	n.c	n.c.
Ho_Chi_Minh_City	11	Vietnam	All	MEDIUM	46(1.8)	SM	10(1.3)	1.21(0.6-2.46)	0.59	CMonly	1(0.5)	0.57(0.08-4.23)	0.58	SMAonly	1(3.2)	1.17(0.14-10.11)	0.89
Ho_Chi_Minh_City	11	Vietnam	All	HIGH	2(0.1)	SM	1(0.1)	1.16(0.1-12.8)	0.9	CMonly	0(0)	n.c	n.c.	SMAonly	0(0)	n.c	n.c.
Ho_Chi_Minh_City	11	Vietnam	All	VERY HIGH	18(0.7)	SM	8(1)	1.02(0.43-2.42)	0.96	CMonly	1(0.5)	0.48(0.06-3.65)	0.48	SMAonly	2(6.5)	10.09(1.8-56.46)	8.54e-03
Madang	12	Papua New Guinea	All	ZERO	221(91.3)	SM	355(92.7)	-	0.66	CMonly	41(93.2)	-	0.68	SMAonly	109(94)	-	0.6
Madang	12	Papua New Guinea	All	LOW	0(0)	SM	0(0)	n.c	n.c.	CMonly	0(0)	n.c	n.c.	SMAonly	0(0)	n.c	n.c.
Madang	12	Papua New Guinea	All	MEDIUM	10(4.1)	SM	16(4.2)	1.1(0.48-2.53)	0.83	CMonly	2(4.5)	1.19(0.26-5.38)	0.82	SMAonly	5(4.3)	0.94(0.31-2.87)	0.92
Madang	12	Papua New Guinea	All	HIGH	0(0)	SM	0(0)	n.c	n.c.	CMonly	0(0)	n.c	n.c.	SMAonly	0(0)	n.c	n.c.
Madang	12	Papua New Guinea	All	VERY HIGH	11(4.5)	SM	12(3.1)	0.68(0.29-1.58)	0.37	CMonly	1(2.3)	0.41(0.08-2.13)	0.29	SMAonly	2(1.7)	0.48(0.1-2.23)	0.35
All	13	All	All	ZERO	9721(57.6)	SM	6515(54.9)	-	0.14	CMonly	1884(56.1)	-	2.29e-04	SMAonly	1107(50.7)	-	1.02e-04
All	13	All	All	LOW	3704(21.9)	SM	2929(24.7)	1.05(0.99-1.12)	0.12	CMonly	837(24.9)	1.03(0.93-1.13)	0.56	SMAonly	533(24.4)	1.05(0.93-1.19)	0.45
All	13	All	All	MEDIUM	2001(11.8)	SM	1310(11)	0.94(0.86-1.03)	0.16	CMonly	377(11.2)	0.86(0.75-0.99)	0.04	SMAonly	252(11.5)	0.95(0.8-1.14)	0.6
All	13	All	All	HIGH	1406(8.3)	SM	1079(9.1)	1.02(0.93-1.12)	0.71	CMonly	258(7.7)	0.8(0.69-0.93)	2.95e-03	SMAonly	281(12.9)	1.49(1.26-1.76)	2.22e-06
All	13	All	All	VERY HIGH	57(0.3)	SM	38(0.3)	0.87(0.55-1.36)	0.54	CMonly	3(0.1)	0.28(0.09-0.86)	0.03	SMAonly	11(0.5)	1.44(0.66-3.17)	0.36
Banjul	1	Gambia	F	ZERO	766(46.9)	SM	589(49.3)	-	2.83e-03	CMonly	202(50.4)	-	7.18e-03	SMAonly	98(43.9)	-	0.06
Banjul	1	Gambia	F	LOW	520(31.9)	SM	403(33.8)	1.03(0.86-1.22)	0.77	CMonly	147(36.7)	1.1(0.86-1.41)	0.44	SMAonly	75(33.6)	1.17(0.84-1.62)	0.35
Banjul	1	Gambia	F	MEDIUM	310(19)	SM	175(14.7)	0.75(0.6-0.94)	1.17e-02	CMonly	48(12)	0.6(0.43-0.85)	4.04e-03	SMAonly	42(18.8)	1.09(0.74-1.61)	0.67
Banjul	1	Gambia	F	HIGH	35(2.1)	SM	21(1.8)	0.89(0.5-1.58)	0.69	CMonly	4(1)	0.48(0.17-1.38)	0.17	SMAonly	6(2.7)	1.51(0.61-3.76)	0.37
Banjul	1	Gambia	F	VERY HIGH	1(0.1)	SM	6(0.5)	13.54(1.46-125.83)	0.02	CMonly	0(0)	0(0-2.24e+272)	0.98	SMAonly	2(0.9)	54.99(2.85-1061.08)	7.97e-03
Bamako	2	Mali	F	ZERO	52(32.3)	SM	63(32.8)	-	0.95	CMonly	10(31.2)	-	0.48	SMAonly	24(30.4)	-	0.88
Bamako	2	Mali	F	LOW	59(36.6)	SM	68(35.4)	0.93(0.54-1.58)	0.78	CMonly	16(50)	1.19(0.47-2.99)	0.71	SMAonly	26(32.9)	0.93(0.46-1.87)	0.84
Bamako	2	Mali	F	MEDIUM	46(28.6)	SM	57(29.7)	0.94(0.54-1.64)	0.84	CMonly	5(15.6)	0.51(0.16-1.68)	0.27	SMAonly	26(32.9)	1.19(0.59-2.41)	0.63
Bamako	2	Mali	F	HIGH	4(2.5)	SM	4(2.1)	0.66(0.15-2.84)	0.57	CMonly	1(3.1)	1.14(0.1-12.85)	0.92	SMAonly	3(3.8)	1.41(0.29-6.93)	0.68
Bamako	2	Mali	F	VERY HIGH	0(0)	SM	0(0)	n.c	n.c.	CMonly	0(0)	n.c	n.c.	SMAonly	0(0)	n.c	n.c.
Ougadougou	3	Burkina Faso	F	ZERO	111(31.7)	SM	130(35.3)	-	0.09	CMonly	12(25)	-	0.11	SMAonly	7(35)	-	0.48
Ougadougou	3	Burkina Faso	F	LOW	139(39.7)	SM	110(29.9)	0.69(0.48-0.99)	0.04	CMonly	13(27.1)	0.87(0.38-2)	0.75	SMAonly	6(30)	0.69(0.22-2.12)	0.52
Ougadougou	3	Burkina Faso	F	MEDIUM	91(26)	SM	118(32.1)	1.07(0.74-1.56)	0.71	CMonly	21(43.8)	2.01(0.94-4.33)	0.07	SMAonly	5(25)	0.82(0.25-2.69)	0.75
Ougadougou	3	Burkina Faso	F	HIGH	9(2.6)	SM	10(2.7)	0.94(0.37-2.42)	0.9	CMonly	2(4.2)	1.83(0.35-9.5)	0.47	SMAonly	2(10)	3.14(0.57-17.43)	0.19
Ougadougou	3	Burkina Faso	F	VERY HIGH	0(0)	SM	0(0)	n.c	n.c.	CMonly	0(0)	n.c	n.c.	SMAonly	0(0)	n.c	n.c.
Noguchi	4	Ghana (Navrongo)	F	ZERO	18(20.2)	SM	86(29.7)	-	0.04	CMonly	3(27.3)	-	0.17	SMAonly	30(32.6)	-	6.43e-04
Noguchi	4	Ghana (Navrongo)	F	LOW	38(42.7)	SM	101(34.8)	0.55(0.29-1.06)	0.07	CMonly	4(36.4)	0.56(0.11-2.88)	0.49	SMAonly	27(29.3)	0.38(0.17-0.86)	0.02
Noguchi	4	Ghana (Navrongo)	F	MEDIUM	32(36)	SM	89(30.7)	0.59(0.3-1.15)	0.12	CMonly	3(27.3)	0.47(0.08-2.72)	0.4	SMAonly	26(28.3)	0.48(0.21-1.09)	0.08
Noguchi	4	Ghana (Navrongo)	F	HIGH	1(1.1)	SM	14(4.8)	4.65(0.49-43.84)	0.18	CMonly	1(9.1)	n.c	n.c.	SMAonly	9(9.8)	18.98(1.07-335.93)	0.04
Noguchi	4	Ghana (Navrongo)	F	VERY HIGH	0(0)	SM	0(0)	n.c	n.c.	CMonly	0(0)	n.c	n.c.	SMAonly	0(0)	n.c	n.c.
Kumasi	5	Ghana (Kumasi)	F	ZERO	324(32.8)	SM	219(31.6)	-	0.9	CMonly	45(39.5)	-	0.49	SMAonly	69(26.6)	-	0.12
Kumasi	5	Ghana (Kumasi)	F	LOW	319(32.3)	SM	228(32.9)	1.04(0.81-1.35)	0.75	CMonly	39(34.2)	0.86(0.52-1.43)	0.56	SMAonly	96(37.1)	1.53(1.03-2.26)	0.03
Kumasi	5	Ghana (Kumasi)	F	MEDIUM	311(31.5)	SM	217(31.4)	1.07(0.82-1.38)	0.63	CMonly	28(24.6)	0.68(0.4-1.17)	0.16	SMAonly	81(31.3)	1.45(0.98-2.15)	0.07
Kumasi	5	Ghana (Kumasi)	F	HIGH	33(3.3)	SM	28(4)	1.22(0.69-2.16)	0.5	CMonly	2(1.8)	0.54(0.12-2.37)	0.42	SMAonly	13(5)	1.76(0.78-3.97)	0.18
Kumasi	5	Ghana (Kumasi)	F	VERY HIGH	0(0)	SM	0(0)	n.c	n.c.	CMonly	0(0)	n.c	n.c.	SMAonly	0(0)	n.c	n.c.
Ibadan	6	Nigeria	F	ZERO	3(13.6)	SM	13(41.9)	-	0.04	CMonly	1(50)	-	0.61	SMAonly	2(50)	-	0.06
Ibadan	6	Nigeria	F	LOW	4(18.2)	SM	8(25.8)	0.47(0.08-2.75)	0.4	CMonly	0(0)	n.c	n.c.	SMAonly	0(0)	n.c	n.c.
Ibadan	6	Nigeria	F	MEDIUM	13(59.1)	SM	7(22.6)	0.13(0.03-0.6)	9.57e-03	CMonly	1(50)	0.3(0.01-6.38)	0.44	SMAonly	1(25)	n.c	n.c.
Ibadan	6	Nigeria	F	HIGH	2(9.1)	SM	3(9.7)	0.36(0.04-3.36)	0.37	CMonly	0(0)	n.c	n.c.	SMAonly	1(25)	1.5(0.06-40.63)	0.81
Ibadan	6	Nigeria	F	VERY HIGH	0(0)	SM	0(0)	n.c	n.c.	CMonly	0(0)	n.c	n.c.	SMAonly	0(0)	n.c	n.c.
Buea	7	Cameroon	F	ZERO	72(45.3)	SM	114(39.9)	-	0.24	CMonly	9(47.4)	-	0.28	SMAonly	10(24.4)	-	0.04
Buea	7	Cameroon	F	LOW	59(37.1)	SM	120(42)	1.55(0.98-2.43)	0.06	CMonly	9(47.4)	1.42(0.52-3.89)	0.5	SMAonly	21(51.2)	3.16(1.31-7.57)	1.01e-02
Buea	7	Cameroon	F	MEDIUM	25(15.7)	SM	49(17.1)	1.08(0.6-1.94)	0.79	CMonly	1(5.3)	0.27(0.03-2.31)	0.23	SMAonly	8(19.5)	2.13(0.72-6.28)	0.17
Buea	7	Cameroon	F	HIGH	3(1.9)	SM	3(1)	0.66(0.12-3.7)	0.63	CMonly	0(0)	n.c	n.c.	SMAonly	2(4.9)	5.32(0.68-41.52)	0.11
Buea	7	Cameroon	F	VERY HIGH	0(0)	SM	0(0)	n.c	n.c.	CMonly	0(0)	n.c	n.c.	SMAonly	0(0)	n.c	n.c.
Kilifi	8	Kenya	F	ZERO	666(34.2)	SM	392(36)	-	0.2	CMonly	152(34.4)	-	0.67	SMAonly	28(38.9)	-	0.76
Kilifi	8	Kenya	F	LOW	584(29.9)	SM	346(31.8)	1.01(0.84-1.22)	0.89	CMonly	137(31)	1.04(0.8-1.35)	0.77	SMAonly	21(29.2)	0.91(0.51-1.63)	0.75
Kilifi	8	Kenya	F	MEDIUM	634(32.5)	SM	312(28.7)	0.84(0.69-1.02)	0.07	CMonly	135(30.5)	0.93(0.71-1.21)	0.58	SMAonly	20(27.8)	0.74(0.41-1.35)	0.33
Kilifi	8	Kenya	F	HIGH	66(3.4)	SM	39(3.6)	1.05(0.68-1.61)	0.82	CMonly	18(4.1)	1.29(0.73-2.27)	0.38	SMAonly	3(4.2)	1.17(0.34-3.97)	0.8
Kilifi	8	Kenya	F	VERY HIGH	0(0)	SM	0(0)	n.c	n.c.	CMonly	0(0)	n.c	n.c.	SMAonly	0(0)	n.c	n.c.
Moshi	9	Tanzania	F	ZERO	87(34.8)	SM	95(47.5)	-	1.04e-02	CMonly	8(47.1)	-	0.68	SMAonly	42(58.3)	-	1.42e-03
Moshi	9	Tanzania	F	LOW	67(26.8)	SM	45(22.5)	0.63(0.38-1.04)	0.07	CMonly	3(17.6)	0.51(0.13-2.07)	0.35	SMAonly	14(19.4)	0.46(0.22-0.93)	0.03
Moshi	9	Tanzania	F	MEDIUM	86(34.4)	SM	49(24.5)	0.47(0.29-0.76)	2.00e-03	CMonly	5(29.4)	0.56(0.17-1.81)	0.33	SMAonly	13(18.1)	0.27(0.13-0.55)	2.89e-04
Moshi	9	Tanzania	F	HIGH	10(4)	SM	11(5.5)	1.16(0.43-3.13)	0.77	CMonly	1(5.9)	1.07(0.11-10.56)	0.95	SMAonly	3(4.2)	0.72(0.17-3.08)	0.66
Moshi	9	Tanzania	F	VERY HIGH	0(0)	SM	0(0)	n.c	n.c.	CMonly	0(0)	n.c	n.c.	SMAonly	0(0)	n.c	n.c.
Blantyre	10	Malawi	F	ZERO	447(36.2)	SM	244(36.1)	-	0.88	CMonly	167(38.3)	-	0.69	SMAonly	17(26.6)	-	0.42
Blantyre	10	Malawi	F	LOW	343(27.8)	SM	197(29.2)	1.07(0.84-1.35)	0.58	CMonly	127(29.1)	1.01(0.77-1.32)	0.96	SMAonly	20(31.2)	1.56(0.81-3.03)	0.19
Blantyre	10	Malawi	F	MEDIUM	397(32.2)	SM	211(31.3)	0.99(0.79-1.25)	0.94	CMonly	127(29.1)	0.87(0.67-1.14)	0.32	SMAonly	24(37.5)	1.62(0.86-3.07)	0.14
Blantyre	10	Malawi	F	HIGH	47(3.8)	SM	23(3.4)	0.9(0.53-1.52)	0.68	CMonly	15(3.4)	0.85(0.46-1.57)	0.61	SMAonly	3(4.7)	1.68(0.47-5.96)	0.42
Blantyre	10	Malawi	F	VERY HIGH	0(0)	SM	0(0)	n.c	n.c.	CMonly	0(0)	n.c	n.c.	SMAonly	0(0)	n.c	n.c.
Ho_Chi_Minh_City	11	Vietnam	F	ZERO	1113(96)	SM	200(94.8)	-	0.26	CMonly	46(97.9)	-	0.55	SMAonly	16(94.1)	-	0.94
Ho_Chi_Minh_City	11	Vietnam	F	LOW	0(0)	SM	0(0)	n.c	n.c.	CMonly	0(0)	n.c	n.c.	SMAonly	0(0)	n.c	n.c.
Ho_Chi_Minh_City	11	Vietnam	F	MEDIUM	46(4)	SM	10(4.7)	1.13(0.56-2.3)	0.73	CMonly	1(2.1)	0.57(0.08-4.26)	0.58	SMAonly	1(5.9)	1.08(0.13-8.72)	0.94
Ho_Chi_Minh_City	11	Vietnam	F	HIGH	0(0)	SM	0(0)	n.c	n.c.	CMonly	0(0)	n.c	n.c.	SMAonly	0(0)	n.c	n.c.
Ho_Chi_Minh_City	11	Vietnam	F	VERY HIGH	0(0)	SM	1(0.5)	n.c	n.c.	CMonly	0(0)	n.c	n.c.	SMAonly	0(0)	n.c	n.c.
Madang	12	Papua New Guinea	F	ZERO	102(90.3)	SM	154(90.1)	-	0.95	CMonly	17(89.5)	-	0.86	SMAonly	57(91.9)	-	0.65
Madang	12	Papua New Guinea	F	LOW	0(0)	SM	0(0)	n.c	n.c.	CMonly	0(0)	n.c	n.c.	SMAonly	0(0)	n.c	n.c.
Madang	12	Papua New Guinea	F	MEDIUM	10(8.8)	SM	16(9.4)	1.09(0.47-2.51)	0.84	CMonly	2(10.5)	1.2(0.22-6.42)	0.83	SMAonly	5(8.1)	0.94(0.3-3)	0.92
Madang	12	Papua New Guinea	F	HIGH	0(0)	SM	0(0)	n.c	n.c.	CMonly	0(0)	n.c	n.c.	SMAonly	0(0)	n.c	n.c.
Madang	12	Papua New Guinea	F	VERY HIGH	1(0.9)	SM	1(0.6)	0.71(0.04-11.54)	0.81	CMonly	0(0)	n.c	n.c.	SMAonly	0(0)	n.c	n.c.
All	13	All	F	ZERO	3761(46.4)	SM	2299(42.6)	-	3.68e-03	CMonly	672(42.3)	-	0.06	SMAonly	400(39.8)	-	0.03
All	13	All	F	LOW	2132(26.3)	SM	1626(30.1)	0.98(0.9-1.08)	0.72	CMonly	495(31.2)	1.02(0.89-1.17)	0.81	SMAonly	306(30.4)	1.08(0.9-1.29)	0.41
All	13	All	F	MEDIUM	2001(24.7)	SM	1310(24.3)	0.88(0.8-0.97)	8.59e-03	CMonly	377(23.7)	0.83(0.71-0.96)	1.04e-02	SMAonly	252(25.1)	1(0.83-1.21)	0.99
All	13	All	F	HIGH	210(2.6)	SM	156(2.9)	1.02(0.81-1.28)	0.85	CMonly	44(2.8)	0.93(0.66-1.31)	0.67	SMAonly	45(4.5)	1.71(1.16-2.53)	6.86e-03
All	13	All	F	VERY HIGH	2(0)	SM	8(0.1)	7.3(1.43-37.24)	0.02	CMonly	0(0)	n.c	n.c.	SMAonly	2(0.2)	9.72(1.01-93.12)	0.05
Banjul	1	Gambia	M	ZERO	1117(67.7)	SM	928(70.7)	-	0.02	CMonly	308(74.4)	-	1.28e-02	SMAonly	162(65.6)	-	0.86
Banjul	1	Gambia	M	LOW	338(20.5)	SM	280(21.3)	1(0.82-1.2)	0.96	CMonly	76(18.4)	0.82(0.61-1.09)	0.17	SMAonly	53(21.5)	1.06(0.75-1.48)	0.75
Banjul	1	Gambia	M	MEDIUM	0(0)	SM	0(0)	n.c	n.c.	CMonly	0(0)	n.c	n.c.	SMAonly	0(0)	n.c	n.c.
Banjul	1	Gambia	M	HIGH	170(10.3)	SM	95(7.2)	0.72(0.54-0.94)	0.02	CMonly	29(7)	0.64(0.42-0.99)	0.04	SMAonly	27(10.9)	1.16(0.74-1.81)	0.52
Banjul	1	Gambia	M	VERY HIGH	24(1.5)	SM	9(0.7)	0.46(0.21-1.01)	0.05	CMonly	1(0.2)	0.15(0.02-1.15)	0.07	SMAonly	5(2)	1.38(0.51-3.74)	0.52
Bamako	2	Mali	M	ZERO	98(58.7)	SM	142(58.2)	-	0.61	CMonly	34(73.9)	-	0.21	SMAonly	55(53.4)	-	0.62
Bamako	2	Mali	M	LOW	37(22.2)	SM	54(22.1)	1.03(0.62-1.7)	0.91	CMonly	8(17.4)	0.65(0.27-1.6)	0.35	SMAonly	23(22.3)	1.16(0.61-2.21)	0.65
Bamako	2	Mali	M	MEDIUM	0(0)	SM	0(0)	n.c	n.c.	CMonly	0(0)	n.c	n.c.	SMAonly	0(0)	n.c	n.c.
Bamako	2	Mali	M	HIGH	31(18.6)	SM	48(19.7)	0.98(0.57-1.67)	0.93	CMonly	4(8.7)	0.35(0.11-1.13)	0.08	SMAonly	25(24.3)	1.33(0.69-2.55)	0.39
Bamako	2	Mali	M	VERY HIGH	1(0.6)	SM	0(0)	n.c	n.c.	CMonly	0(0)	n.c	n.c.	SMAonly	0(0)	n.c	n.c.
Ougadougou	3	Burkina Faso	M	ZERO	217(58.5)	SM	255(53.3)	-	0.3	CMonly	34(57.6)	-	0.14	SMAonly	9(50)	-	0.63
Ougadougou	3	Burkina Faso	M	LOW	103(27.8)	SM	150(31.4)	1.28(0.94-1.76)	0.12	CMonly	21(35.6)	1.38(0.76-2.5)	0.3	SMAonly	5(27.8)	1.24(0.4-3.8)	0.71
Ougadougou	3	Burkina Faso	M	MEDIUM	0(0)	SM	0(0)	n.c	n.c.	CMonly	0(0)	n.c	n.c.	SMAonly	0(0)	n.c	n.c.
Ougadougou	3	Burkina Faso	M	HIGH	51(13.7)	SM	72(15.1)	1.19(0.79-1.79)	0.39	CMonly	4(6.8)	0.49(0.17-1.45)	0.2	SMAonly	4(22.2)	1.85(0.55-6.28)	0.32
Ougadougou	3	Burkina Faso	M	VERY HIGH	0(0)	SM	1(0.2)	n.c	n.c.	CMonly	0(0)	n.c	n.c.	SMAonly	0(0)	n.c	n.c.
Noguchi	4	Ghana (Navrongo)	M	ZERO	71(65.7)	SM	205(54.2)	-	0.15	CMonly	8(80)	-	0.64	SMAonly	81(53.3)	-	0.08
Noguchi	4	Ghana (Navrongo)	M	LOW	22(20.4)	SM	88(23.3)	1.41(0.82-2.44)	0.22	CMonly	1(10)	0.45(0.05-3.87)	0.47	SMAonly	35(23)	1.5(0.78-2.88)	0.22
Noguchi	4	Ghana (Navrongo)	M	MEDIUM	0(0)	SM	0(0)	n.c	n.c.	CMonly	0(0)	n.c	n.c.	SMAonly	0(0)	n.c	n.c.
Noguchi	4	Ghana (Navrongo)	M	HIGH	15(13.9)	SM	84(22.2)	1.9(1.02-3.54)	0.04	CMonly	1(10)	0.51(0.06-4.59)	0.55	SMAonly	36(23.7)	2.11(1.05-4.26)	0.04
Noguchi	4	Ghana (Navrongo)	M	VERY HIGH	0(0)	SM	1(0.3)	n.c	n.c.	CMonly	0(0)	n.c	n.c.	SMAonly	0(0)	n.c	n.c.
Kumasi	5	Ghana (Kumasi)	M	ZERO	582(56)	SM	445(55.8)	-	0.97	CMonly	70(60.3)	-	0.77	SMAonly	169(58.5)	-	0.19
Kumasi	5	Ghana (Kumasi)	M	LOW	268(25.8)	SM	192(24.1)	1.02(0.81-1.3)	0.85	CMonly	28(24.1)	0.9(0.55-1.48)	0.68	SMAonly	49(17)	0.77(0.53-1.11)	0.16
Kumasi	5	Ghana (Kumasi)	M	MEDIUM	0(0)	SM	0(0)	n.c	n.c.	CMonly	0(0)	n.c	n.c.	SMAonly	0(0)	n.c	n.c.
Kumasi	5	Ghana (Kumasi)	M	HIGH	189(18.2)	SM	159(19.9)	1.07(0.83-1.39)	0.61	CMonly	18(15.5)	0.76(0.43-1.36)	0.36	SMAonly	71(24.6)	1.21(0.85-1.74)	0.29
Kumasi	5	Ghana (Kumasi)	M	VERY HIGH	1(0.1)	SM	1(0.1)	0.96(0.06-16.14)	0.98	CMonly	0(0)	n.c	n.c.	SMAonly	0(0)	n.c	n.c.
Ibadan	6	Nigeria	M	ZERO	10(55.6)	SM	35(76.1)	-	0.11	CMonly	2(50)	-	NA	SMAonly	2(66.7)	-	NA
Ibadan	6	Nigeria	M	LOW	5(27.8)	SM	7(15.2)	0.27(0.06-1.21)	0.09	CMonly	2(50)	n.c	n.c.	SMAonly	0(0)	n.c	n.c.
Ibadan	6	Nigeria	M	MEDIUM	0(0)	SM	0(0)	n.c	n.c.	CMonly	0(0)	n.c	n.c.	SMAonly	0(0)	n.c	n.c.
Ibadan	6	Nigeria	M	HIGH	3(16.7)	SM	4(8.7)	0.22(0.04-1.3)	0.09	CMonly	0(0)	n.c	n.c.	SMAonly	1(33.3)	n.c	n.c.
Ibadan	6	Nigeria	M	VERY HIGH	0(0)	SM	0(0)	n.c	n.c.	CMonly	0(0)	n.c	n.c.	SMAonly	0(0)	n.c	n.c.
Buea	7	Cameroon	M	ZERO	273(65.5)	SM	212(63.1)	-	0.44	CMonly	13(65)	-	0.98	SMAonly	21(51.2)	-	0.04
Buea	7	Cameroon	M	LOW	96(23)	SM	79(23.5)	1.04(0.73-1.49)	0.82	CMonly	5(25)	1.11(0.38-3.22)	0.85	SMAonly	11(26.8)	1.43(0.64-3.18)	0.38
Buea	7	Cameroon	M	MEDIUM	0(0)	SM	0(0)	n.c	n.c.	CMonly	0(0)	n.c	n.c.	SMAonly	0(0)	n.c	n.c.
Buea	7	Cameroon	M	HIGH	48(11.5)	SM	45(13.4)	1.35(0.85-2.15)	0.2	CMonly	2(10)	0.96(0.21-4.41)	0.95	SMAonly	9(22)	3.22(1.35-7.68)	8.61e-03
Buea	7	Cameroon	M	VERY HIGH	0(0)	SM	0(0)	n.c	n.c.	CMonly	0(0)	n.c	n.c.	SMAonly	0(0)	n.c	n.c.
Kilifi	8	Kenya	M	ZERO	1191(60)	SM	661(57.2)	-	0.24	CMonly	276(60.1)	-	0.44	SMAonly	40(46.5)	-	0.02
Kilifi	8	Kenya	M	LOW	416(21)	SM	263(22.8)	1.13(0.93-1.36)	0.21	CMonly	109(23.7)	1.13(0.88-1.46)	0.34	SMAonly	18(20.9)	1.25(0.71-2.21)	0.45
Kilifi	8	Kenya	M	MEDIUM	0(0)	SM	0(0)	n.c	n.c.	CMonly	0(0)	n.c	n.c.	SMAonly	0(0)	n.c	n.c.
Kilifi	8	Kenya	M	HIGH	377(19)	SM	231(20)	1.16(0.95-1.41)	0.14	CMonly	74(16.1)	0.89(0.67-1.18)	0.42	SMAonly	28(32.6)	2.35(1.42-3.88)	8.79e-04
Kilifi	8	Kenya	M	VERY HIGH	1(0.1)	SM	0(0)	0(0-4.88e+162)	0.95	CMonly	0(0)	0(0-2.42e+271)	0.97	SMAonly	0(0)	n.c	n.c.
Moshi	9	Tanzania	M	ZERO	130(63.4)	SM	143(63)	-	0.34	CMonly	11(64.7)	-	1	SMAonly	69(64.5)	-	0.81
Moshi	9	Tanzania	M	LOW	35(17.1)	SM	51(22.5)	1.19(0.71-1.98)	0.51	CMonly	3(17.6)	0.97(0.25-3.83)	0.97	SMAonly	22(20.6)	1.12(0.58-2.15)	0.74
Moshi	9	Tanzania	M	MEDIUM	0(0)	SM	0(0)	n.c	n.c.	CMonly	0(0)	n.c	n.c.	SMAonly	0(0)	n.c	n.c.
Moshi	9	Tanzania	M	HIGH	40(19.5)	SM	33(14.5)	0.73(0.42-1.26)	0.26	CMonly	3(17.6)	0.96(0.24-3.85)	0.96	SMAonly	16(15)	0.85(0.43-1.69)	0.64
Moshi	9	Tanzania	M	VERY HIGH	0(0)	SM	0(0)	n.c	n.c.	CMonly	0(0)	n.c	n.c.	SMAonly	0(0)	n.c	n.c.
Blantyre	10	Malawi	M	ZERO	826(61.3)	SM	415(58.9)	-	0.44	CMonly	271(61.7)	-	0.41	SMAonly	35(53.8)	-	0.24
Blantyre	10	Malawi	M	LOW	252(18.7)	SM	139(19.7)	1.15(0.9-1.47)	0.25	CMonly	89(20.3)	1.13(0.85-1.49)	0.4	SMAonly	11(16.9)	1.08(0.54-2.16)	0.83
Blantyre	10	Malawi	M	MEDIUM	0(0)	SM	0(0)	n.c	n.c.	CMonly	0(0)	n.c	n.c.	SMAonly	0(0)	n.c	n.c.
Blantyre	10	Malawi	M	HIGH	270(20)	SM	151(21.4)	1.11(0.88-1.4)	0.39	CMonly	79(18)	0.89(0.67-1.18)	0.42	SMAonly	19(29.2)	1.65(0.93-2.94)	0.09
Blantyre	10	Malawi	M	VERY HIGH	0(0)	SM	0(0)	n.c	n.c.	CMonly	0(0)	n.c	n.c.	SMAonly	0(0)	n.c	n.c.
Ho_Chi_Minh_City	11	Vietnam	M	ZERO	1326(98.5)	SM	574(98.6)	-	0.97	CMonly	161(99.4)	-	0.56	SMAonly	12(85.7)	-	0.05
Ho_Chi_Minh_City	11	Vietnam	M	LOW	0(0)	SM	0(0)	n.c	n.c.	CMonly	0(0)	n.c	n.c.	SMAonly	0(0)	n.c	n.c.
Ho_Chi_Minh_City	11	Vietnam	M	MEDIUM	0(0)	SM	0(0)	n.c	n.c.	CMonly	0(0)	n.c	n.c.	SMAonly	0(0)	n.c	n.c.
Ho_Chi_Minh_City	11	Vietnam	M	HIGH	2(0.1)	SM	1(0.2)	1.14(0.1-12.6)	0.91	CMonly	0(0)	n.c	n.c.	SMAonly	0(0)	n.c	n.c.
Ho_Chi_Minh_City	11	Vietnam	M	VERY HIGH	18(1.3)	SM	7(1.2)	0.9(0.37-2.18)	0.82	CMonly	1(0.6)	0.46(0.06-3.54)	0.46	SMAonly	2(14.3)	12.28(2.48-60.82)	2.12e-03
Madang	12	Papua New Guinea	M	ZERO	119(92.2)	SM	201(94.8)	-	0.4	CMonly	24(96)	-	0.38	SMAonly	52(96.3)	-	0.42
Madang	12	Papua New Guinea	M	LOW	0(0)	SM	0(0)	n.c	n.c.	CMonly	0(0)	n.c	n.c.	SMAonly	0(0)	n.c	n.c.
Madang	12	Papua New Guinea	M	MEDIUM	0(0)	SM	0(0)	n.c	n.c.	CMonly	0(0)	n.c	n.c.	SMAonly	0(0)	n.c	n.c.
Madang	12	Papua New Guinea	M	HIGH	0(0)	SM	0(0)	n.c	n.c.	CMonly	0(0)	n.c	n.c.	SMAonly	0(0)	n.c	n.c.
Madang	12	Papua New Guinea	M	VERY HIGH	10(7.8)	SM	11(5.2)	0.68(0.28-1.67)	0.4	CMonly	1(4)	0.39(0.04-3.98)	0.43	SMAonly	2(3.7)	0.54(0.11-2.6)	0.44
All	13	All	M	ZERO	5960(67.9)	SM	4216(65.1)	-	0.08	CMonly	1212(68.4)	-	1.49e-03	SMAonly	707(60)	-	1.97e-03
All	13	All	M	LOW	1572(17.9)	SM	1303(20.1)	1.08(0.99-1.19)	0.08	CMonly	342(19.3)	1.01(0.88-1.16)	0.86	SMAonly	227(19.3)	1.05(0.87-1.25)	0.63
All	13	All	M	MEDIUM	0(0)	SM	0(0)	n.c	n.c.	CMonly	0(0)	n.c	n.c.	SMAonly	0(0)	n.c	n.c.
All	13	All	M	HIGH	1196(13.6)	SM	923(14.3)	1.05(0.95-1.16)	0.35	CMonly	214(12.1)	0.79(0.67-0.94)	6.31e-03	SMAonly	236(20)	1.44(1.2-1.74)	1.17e-04
All	13	All	M	VERY HIGH	55(0.6)	SM	30(0.5)	0.65(0.4-1.04)	0.07	CMonly	3(0.2)	0.26(0.08-0.85)	0.03	SMAonly	9(0.8)	1.24(0.58-2.67)	0.58
