# Supplementary material for: Characterisation of the opposing effects of G6PD deficiency on cerebral malaria and severe malarial anaemia
Source: eLife. 2017 Jan 9;6:e15085. doi: 10.7554/eLife.15085 (PMC5222559; doi:10.7554/eLife.15085)
Supplement: Supplementary file 2. — (A) SNP selection across G6PD region for genotyping. (B) SpectroDESIGNER assay design file for 135 G6PD locus SNPs in four multiplexes. (C) SpectroDESIGNER assay design file for 107 G6PD locus SNPs in four multiplexes. (D) SpectroDESIGNER assay design file for 68 G6PD locus SNPs in three multiplexes. DOI: http://dx.doi.org/10.7554/eLife.15085.020 [file elife-15085-supp2.xlsx]

## Sheet: Supplementary file 2A
sequence_code	chr_valid	coord_valid	rsnumber	gene_symbol	strand	reference_allele	alternate_allele	W1174-W1177_TEST_DESIGN	W1174-W1177_TEST_OUTCOME	W1186-W1189_POPULATION_SCREEN	W1186-W1189_FINAL_SET_NOTE1	W1197-W1199_FINAL_SET	source_validation_1	source_validation_2	sequence
rs763737	X	153278307	rs763737	IRAK1	1	G	A				ADDITIONAL	W1198	ADDITIONAL LRH From Sabeti et al.		TCAGGCCTGAATTCCTCAGAGAAGTCCAAGGGCAGGGCCCAGCTCTCAGGCTACCAGACAGAGCCCTCCTTGTTCCCAGCCTTCAGGAATGGGGTGGGGG[A/G]AGGGCTGGAGAGCAAGCTCCACCTGGGAAGGATGTGGCCTGGGGAGGGGAAACCAGGGTTGCTAAGGTCACAGTGAGCTGAACATTTGGCCCTGGTTCTC
rs1734792	X	153341060	rs1734792	MECP2	1	C	A				ADDITIONAL	W1197	ADDITIONAL LRH From Sabeti et al.		AAATGCAAGAATGGGTATGGTCAAGTACAGCTTTTAAGACGCAGAAGTTAAGGAGGGAAAGTGGAAGGAAAAGTAGGGTTATTAATATCCTTATCTTAAA[A/C]AGAGGGGAACTGACATATGGACTAAAATACTGTTTAAAATTTACAGAGAAATGTGGGCTTGGCATGGTAGCTCACACCTGTAATCCCAGCACTTTGGGAG
rs766420	X	153554404	rs766420	TKTL1	1	C	G				ADDITIONAL	W1197	ADDITIONAL LRH From Sabeti et al.		AGCCTGGGTGACAAGAGTAAGACCCTATCTCTAAAAACAAGACAAAAAATAATAGAAATCACTTGAAATGAATAATCTGTTAGGTTCAGATTTTACAGAT[C/G]TAAGGCCAGGAATAAAAGGGAACATGATCTCTGGTATTCTCACAAAAGCCCTGAGAAGTTCAGATTATCAGTCCTATCTGTAGATGAGGATTGGAGAAAG
rs766419	X	153554661	rs766419	TKTL1	1	A	G				ADDITIONAL	W1198	ADDITIONAL LRH From Sabeti et al.		TGAGTAGTGAGCCCAGTCTCCCCAGGTCTGCCCACCACGCTGACCATCCCCTGCTCAGCCTGCCTGTCAGGGCCATGCATAGAGAAAAGCAGAAACGTCT[A/G]TGGAGAAAATAAGTGACTCTGCTCATCACCTAGGGAGTGGGGCTTGTAGACATTTTGGCATGCTTCCTTCCTGTCTTTGTTCTAGGCATACATGTATATT
rs743545	X	153593150	rs743545	G6PD	1	G	A				ADDITIONAL	W1198	ADDITIONAL LRH From Sabeti et al.		TTCGATCTTAGCCTGCGATGGCCCTTCCACCGAGAAGCCTGACAACAGCCACCAGTCCCCTCAGTGCCCTGGAGCCTCAGGGTGGGCCGTCCTTGCCATC[A/G]TCTGTCCCCAGGTGCCCATGCTGCAGCCTCCAACTTACCCAGCGTGCCCACGTCGTCCCCGATAGCCTCCACCACAAAGTCTGCTGACTTGCCAACGACG
rs915941	X	153626649	rs915941	RPL10	1	C	A				ADDITIONAL	W1198	ADDITIONAL LRH From Sabeti et al.		CTCTCTGATCTGCGCATGTGCTGGGCTACGCCCGGGCGCAAGCGCCAAGAGCGGCTGCGTCTATGGTCATGACGTCTGACAGAGCGTCCACCCGTCTTCG[A/C]CAGGACTCTATGGTTCTTACGCGCGCAGACAGACCGCCTATATAAGCCATGCGCAGGCGGAGGAGCGCCTCTTTCCCTTCGGTGTGGTGAGTAAGCGCAG
rs915942	X	153626738	rs915942	SNORA70	1	G	A				ADDITIONAL	W1198	ADDITIONAL LRH From Sabeti et al.		ACCCGTCTTCGACAGGACTCTATGGTTCTTACGCGCGCAGACAGACCGCCTATATAAGCCATGCGCAGGCGGAGGAGCGCCTCTTTCCCTTCGGTGTGGT[A/G]AGTAAGCGCAGTTGTCGTCTCTTGCGGTGCCGTTGCTGGTTCTCACACCTTTTAGGTCTGTTCTCGTCTTCCGTTCCGACTCTCTCTTTTTCGTTGCAGC
rs743548	X	153650420	rs743548	TAZ	1	T	A/C/G				ADDITIONAL	W1198	ADDITIONAL LRH From Sabeti et al.		ATTGGGGCCACACTTCAGAGAGACCCAAGTGTGGAGAATCAATTGGATCCTACCTGGGCTGCATCATAGGTGGGAGAGGAGCTCTGAAGAGCCCGGCAAG[A/C/G/T]AGCCAGCCATGAGCAGTGCACGCTGTGATCAGGAGGTAGGATTGGGGTTGCCCAGATGGAGCTGGGGGTCCTGGGTGGGAGCAAAGGCAAATCCAGGGTG
rs762513	X	153675171	rs762513	FAM50A	1	A	G				ADDITIONAL	W1198	ADDITIONAL LRH From Sabeti et al.		CCAGGCTGGCTGGGCACATTTTCTGTGATGATGGAAATGTTAGAGTCTGTGCCACCCAATATGGTAGCCACTTGCCCCAGGTGCCTCGTATGACTGGGGC[A/G]CTAAATGGTGAATTCTGTTTGATTTGTTTCAGCGTAAATGTATACAGCCACAGAAATTCCGAGGCTACTAGTCAGACACTGCAGGTCTCAGCTGTGAGAA
rs5986874	X	153748482	rs5986874	G6PD	1	C	T	W1176	FAIL				dbSNP		GCAGTCACAGCTCACTGCAACCTCTGCCTCCCAGGCTCAAGCGATTCTCCTGCCTCAGCCTCCTCAGCAGCTGGGATTACAGGCATGTGCCACTACTGGC[C/T]GGCTAATTTCTGTATTTTTAGTAGAGACGGGGTTTCACCATGTTGGCCAGGCTGGTCTYGAACTCCTGGCCTCAAATGATCCACCTGCCTCGGCCTCCTA
rs11156578	X	153749844	rs11156578	G6PD	1	A	G	W1177	GOOD	W1189	DID NOT MULTIPLEX		dbSNP		TTCTCCCCATGTGATAGTCTGAAATATGGCCTCGTGGGATGAGAAAGACCTGACCGTCCCCCAGCCCAACACCCGTAAAGGGTCTGTGCTGAGGTGGATT[A/G]GTAAAAGAGGAARGCCTCTTGCAGTTGAGATAGAGGAAGGCCACTGTCTCCTGCCTGCCCCTGGGAACTGAATGTCTCRGTATAAAACCYGATTGTACAT
rs5945200	X	153749923	rs5945200	G6PD	1	A	G	W1176	FAIL				dbSNP		GGGTCTGTGCTGAGGTGGATTRGTAAAAGAGGAARGCCTCTTGCAGTTGAGATAGAGGAAGGCCACTGTCTCCTGCCTGCCCCTGGGAACTGAATGTCTC[A/G]GTATAAAACCYGATTGTACATTTGTTCAATTCTGAGATCGGAGAAGAACCGCCCTATGGCGGGAGGCGAGACATGTTKGCAGTAATRCTGCCTTGTTATT
rs5945202	X	153750010	rs5945202	G6PD	1	A	G	W1176	GOOD	W1188	DID NOT MULTIPLEX		dbSNP		AACTGAATGTCTCRGTATAAAACCYGATTGTACATTTGTTCAATTCTGAGATCGGAGAAGAACCGCCCTATGGCGGGAGGCGAGACATGTTKGCAGTAAT[A/G]CTGCCTTGTTATTCTTTACTCCACTGAGATGTTTGGGYGGAGAGAAACATAAATCTGGCCTACGTGCACATCCAGGCATAGTACCTTCCCTTGAACTTAA
rs3205649	X	153750233	rs3205649	G6PD	1	C	T	W1177	GOOD	W1189	DID NOT MULTIPLEX		dbSNP		CACGTTTTTTGCTGACCTTCTCCTTATTATCACCCTGCTCTCCTACTGCATTCCTTTTTGCTGAAATAATGAAAATAATAATCAATAAAAACTGAGGGAA[C/T]TCAGAGGCCAGTGCAGGTCCTTGGTGTGCTGAGCGCCGGTCCCCTGGGCCCACTATTGTTTCTCTATACTTTGTCTCTGTGTCTTAGTTCTTTTCTCAGT
rs62617844	X	153751048	rs62617844	G6PD	1	G	A	W1175	FAIL				dbSNP		GAGAATACGCTGGTGGTGCTTGTGGCTGCAGTGTTTACCCCGAGATAACTTTGCCATGAAGTATCTTCCTTTTATTATTTTTTCATCGCTCTAGTATATC[A/G]ACTTTGGAAACAAAAGACATCACTCTATTTAGAGCATTCCTTTCTTAGTAGTGGTATTTCCATTGACAAAAAAATAGTAATTCTGAATTGCCGAAAATGT
rs2515909	X	153751758	rs2515909	G6PD	1	G	C	W1175	FAIL				dbSNP		TCAAACCCCATGTGATGGGTCATTGGGTCATGAGATGCTGGAACATCACTGTATTGCTGGCTTTGGAGAAAGATAGATTTTTTTTTTTTTTTTTGAGACG[C/G]CGTTTCACTCCGTTGCCCAGGCTGGAGTGCAATGGTGTGACCTCGCCTCACTGCAACCTCCGCCTCCCGGGTCCAAGTGATTCTCCTGCCTCAGCCTCCC
rs12837311	X	153752596	rs12837311	G6PD	1	A	C	W1176	GOOD	W1188	DID NOT MULTIPLEX		dbSNP		AGGTGAAGGTTGCAGTGAGCCGAGATTGTGGCCACTGCACTCCAACCTGGGCTACAGAGTTGGACTGTGTCTCMAAAAAAAAAAAAAAAAAAAAAAARGC[A/C]GCAAGACAGTGAAACAACTATTTACGTAGTACTTATATTGTATTAGATACTATAAGTTATCTAGAGATGATTAGATTATTTCAAGTGTATGGGAGGACTG
rs28470352	X	153753490	rs28470352		1	T	A	W1177	GOOD	W1189	RE-PLEXED	W1197	dbSNP		GATTGTTCCATCTAGTACTGGGTTTCTTCTGCTTGAGGCACACACTTTTTGGTGAGAAAATGTTGGTGGCAAATTCTTTGCTTTTGTTTGCACTTCACCA[A/T]CATACTTGAAAGATTTTTTTTTTTTTAAGTCGGAGTCTCGCTCTTTTGCCCAGGCTGGAGTGCAGTGGCACAATCTAGGCTCACTACAACCTCTGCCTCC
rs61042368	X	153755336	rs61042368	G6PD	1	G	A	W1176	GOOD	W1188	RE-PLEXED	W1198	dbSNP		TTACAGGAGTGAGACACTGTGTCCAGCCATAGAGTCTCACTGTCCTTACAGAAAGCCAGAATTCAGTCTGCTTCTTGTTCCCTCAAAGCTTCCTCGAAGT[A/G]TTCTAGTGGAGGCGAGCAGTGAAGCTCTAGGAGGCAAGAGGCCTTCTCAGGGACCCCAGCTTTGGCCTGTATGTCTGGGTGTCGTCCTGGACTAGTCTGA
rs1894260	X	153755989	rs1894260	G6PD	1	C	T	W1177	GOOD	W1189	DID NOT MULTIPLEX		dbSNP.sabeti_02		CTAGGTTTGAAATTCTCTTCCGGCTTAATAATTTGCAGGTCTGGGCTGGGAGGTAAAGCTCTGAGTACACTGCGAGTGTCAGGGGTCCGGCAGGGGRGCT[C/T]TTTCCAGCTCCTACCCACTCCCGCGTGGGGTGAAACCTTGAGAGATGAGACACCAATCCAGGGCCTCTGAAGACCCACGAGGTAGAGTGCACTTAACAGT
rs2515907	X	153756671	rs2515907	G6PD	1	A	G	W1177	FAIL				dbSNP		CTGTGTGTGCTGGCGGGTGCCTGTAGTCCCAGCTACTTGGGAGGCTGAGGCAGGAGAATCACTTGACCCCAGGTGGTGGAGGTTGCAGTGAACTGAGATC[A/G]CGCCACTGCACTCCTGCACGCCAGCCTGGCGAAAGAGCAAGAGTCTGTCTCAAAAAAAAAAAAAGAARAARAAGAAAAAAARAAAAAAAAAAAGAGTAAA
rs6643678	X	153757629	rs6643678	G6PD	1	G	A	W1175	GOOD	W1187	DID NOT MULTIPLEX		dbSNP		GCACTCCAACCTGGGCAACAGAGTGAGATCCAGTYTCAAAAAAAAAAAAAAAAAAAAAAAAAAAAGCAAATTGTGGCTGAATTCTTTGGCATTGCAGGCA[A/G]ARAAGGGGTGAAAACAGGGCTCCAGCCTTGAACCGGTCAGCAGGGGTCAGGGAGGCTGAGTGAGTCACCCTATGGAATGGGCCAGGGTGGATCTGGGCTC
rs6643679	X	153757631	rs6643679	G6PD	1	G	A	W1177	GOOD	W1189	DID NOT MULTIPLEX		dbSNP		ACTCCAACCTGGGCAACAGAGTGAGATCCAGTYTCAAAAAAAAAAAAAAAAAAAAAAAAAAAAGCAAATTGTGGCTGAATTCTTTGGCATTGCAGGCARA[A/G]AAGGGGTGAAAACAGGGCTCCAGCCTTGAACCGGTCAGCAGGGGTCAGGGAGGCTGAGTGAGTCACCCTATGGAATGGGCCAGGGTGGATCTGGGCTCAC
rs12389568	X	153757733	rs12389568	G6PD	1	G	A	W1174	FAIL				dbSNP		AGGGGTGAAAACAGGGCTCCAGCCTTGAACCGGTCAGCAGGGGTCAGGGAGGCTGAGTGAGTCACCCTATGGAATGGGCCAGGGTGGATCTGGGCTCACA[A/G]RCAAGGGCCTCAGTGCTCCTGTGAGCTCCAAGGGGCTGGGGAGGACTGCCTTCTTGTTCAGGGTACAGCTCGTGTTGTTTTCTCGGGCTTATGTCCATGT
rs12389569	X	153757734	rs12389569	G6PD	1	G	A	W1177	GOOD	W1189	RE-PLEXED	W1198	Sanger sequencing		GGGGTGAAAACAGGGCTCCAGCCTTGAACCGGTCAGCAGGGGTCAGGGAGGCTGAGTGAGTCACCCTATGGAATGGGCCAGGGTGGATCTGGGCTCACAR[A/G]CAAGGGCCTCAGTGCTCCTGTGAGCTCCAAGGGGCTGGGGAGGACTGCCTTCTTGTTCAGGGTACAGCTCGTGTTGTTTTCTCGGGCTTATGTCCATGTC
G6PD_X_b36_153411172	X	153757978		G6PD	1	C	G	W1175	GOOD	W1187	RE-PLEXED	W1198	Sanger sequencing		ACCTGATCTCTCATTCTCTCCCATTGTGGACCCAGTGCTGTCCTCACCTGGGACCTCCTGCCTCCACCCAAGTAGGCGCCCAGAGCTGAAGGGACAGTTG[C/G]CTGATGGGTTCAGGTRCCAGTGGATGGTCTTCCACCTCCCGGGTTCAAGCGATTGTCCTGCCTCAGCCTCCTGAGTAGCTGGGAMCACAGGTGCCCGCCA
G6PD_X_b36_153411188	X	153757994		G6PD	1	G	A	W1176	GOOD	W1188	DID NOT MULTIPLEX		Sanger sequencing		TCTCCCATTGTGGACCCAGTGCTGTCCTCACCTGGGACCTCCTGCCTCCACCCAAGTAGGCGCCCAGAGCTGAAGGGACAGTTGSCTGATGGGTTCAGGT[A/G]CCAGTGGATGGTCTTCCACCTCCCGGGTTCAAGCGATTGTCCTGCCTCAGCCTCCTGAGTAGCTGGGAMCACAGGTGCCCGCCACCACGCCTGGCAAATT
G6PD_X_b36_153411257	X	153758063	rs782431478	G6PD	1	C	A	W1177	FAIL				Sanger sequencing		CTGAAGGGACAGTTGSCTGATGGGTTCAGGTRCCAGTGGATGGTCTTCCACCTCCCGGGTTCAAGCGATTGTCCTGCCTCAGCCTCCTGAGTAGCTGGGA[A/C]CACAGGTGCCCGCCACCACGCCTGGCAAATTTTTGTATTTTTTTTGGTAGGGACATGTTTTCGTCATGTTGGTCAGGCTGGTCTTGAACTTCTGGCCTCA
rs2515906	X	153758189	rs2515906	G6PD	1	A	G	W1174	GOOD	W1186	DID NOT MULTIPLEX		Sanger sequencing		CAAATTTTTGTATTTTTTTTGGTAGGGACATGTTTTCGTCATGTTGGTCAGGCTGGTCTTGAACTTCTGGCCTCAAGTGATCTGCCCATCTTGGCTTCCT[A/G]AAGTGCTGAGATTACACGCTTGAGCCACTGCGCCTGGCCTTACTTGGGTGTTGTTCCCTGCCCTGGAACCTACCCTGCTTAGCCTTACCACACCCCATCA
G6PD_X_b36_153411809	X	153758615	rs113098908	G6PD	1	G	A	W1175	FAIL				Sanger sequencing		GAGGTGCCACTCCCCATTCAGGGCACAGGAAGAGCAAGAATTGAACACCGGGATGCAGCATGTGTCCCTGTTGCCACAGGTCTCACCAGAGGCCTCCTTC[A/G]TTCTACGACATCGGGCCCTGCTACCTGCAGCGCCCAGGGTGCGCRTCCTCACCTGTGCTGCGGGTGGAACACTCCTCCCTGGCCACTTTCCAGGCCACTG
rs12393550	X	153758660	rs12393550	G6PD	1	G	A	W1174	GOOD	W1186	RE-PLEXED	W1198	Sanger sequencing		CACCGGGATGCAGCATGTGTCCCTGTTGCCACAGGTCTCACCAGAGGCCTCCTTCRTTCTACGACATCGGGCCCTGCTACCTGCAGCGCCCAGGGTGCGC[A/G]TCCTCACCTGTGCTGCGGGTGGAACACTCCTCCCTGGCCACTTTCCAGGCCACTGGTTTGCTCTCCGCAAAGGACAAATCCCAGCACCACCTGGTTATTT
G6PD_X_b36_153412566	X	153759372	rs184533364	G6PD	1	C	T	W1174	GOOD	W1186	RE-PLEXED	W1197	Sanger sequencing		CAGTCACAAAACCCATCCCCTCTCCTTCCTAAATACTTCTGTGGACTGGCAGTGTTGCTGGAAGTCATCTTGGGTGGGGCAGGGACATGGACAGTAAGAG[C/T]GGAAGGTGACCCCACATCCTTGCACCTCAAGCTGGTCTCACAATGACAATATGMGTGGAGYGGAGGAGGACTCAGGAGGTGTCTCTGACACCAAACATGG
G6PD_X_b36_153412620	X	153759426	rs188196644	G6PD	1	C	A	W1175	GOOD	W1187	RE-PLEXED	W1198	Sanger sequencing		TTGCTGGAAGTCATCTTGGGTGGGGCAGGGACATGGACAGTAAGAGYGGAAGGTGACCCCACATCCTTGCACCTCAAGCTGGTCTCACAATGACAATATG[A/C]GTGGAGYGGAGGAGGACTCAGGAGGTGTCTCTGACACCAAACATGGTCATGGCTGGACATGGGGTCAGAAYCAGAAGTGAGGAGGCTCCTCAGTGGCCAC
G6PD_X_b36_153412691	X	153759497		G6PD	1	C	T	W1175	GOOD	W1187	DID NOT MULTIPLEX		Sanger sequencing		CCTCAAGCTGGTCTCACAATGACAATATGMGTGGAGYGGAGGAGGACTCAGGAGGTGTCTCTGACACCAAACATGGTCATGGCTGGACATGGGGTCAGAA[C/T]CAGAAGTGAGGAGGCTCCTCAGTGGCCACAGAGGAAGCACCCRGGTGACTTGGGGAGTGGGACAAGGAAGTGGGTCCTCAGGGAAGCAAATGACAAGGGG
G6PD_X_b36_153412734	X	153759540		G6PD	1	C	NOT FOUND	W1176	GOOD	W1188	RE-PLEXED	W1198	Sanger sequencing		GGACTCAGGAGGTGTCTCTGACACCAAACATGGTCATGGCTGGACATGGGGTCAGAAYCAGAAGTGAGGAGGCTCCTCAGTGGCCACAGAGGAAGCACCC[A/G]GGTGACTTGGGGAGTGGGACAAGGAAGTGGGTCCTCAGGGAAGCAAATGACAAGGGGACAGGAGGGGCTGTTTGCGGATTTAATGGCAGGGCATTGAGGT
rs1050831	X	153759644	rs1050831	G6PD	1	G	A	W1176	GOOD	W1188	DID NOT MULTIPLEX		dbSNP		GACTTGGGGAGTGGGACAAGGAAGTGGGTCCTCAGGGAAGCAAATGACAAGGGGACAGGAGGGGCTGTTTGCGGATTTAATGGCAGGGCATTGAGGTTGG[A/G]AGGGGTCCCAGCTGCTGCGTCTRCTTTTCTTATAGCARARAGGCTGCCTACGGGTGGCACGGGGTGGCCATGGWGTGCAGAGTTGGTGGGACAGGGGACA
G6PD_X_b36_153412861	X	153759667	rs181015082	G6PD	1	G	A	W1177	GOOD	W1189	RE-PLEXED	W1198	Sanger sequencing		GTGGGTCCTCAGGGAAGCAAATGACAAGGGGACAGGAGGGGCTGTTTGCGGATTTAATGGCAGGGCATTGAGGTTGGRAGGGGTCCCAGCTGCTGCGTCT[A/G]CTTTTCTTATAGCARARAGGCTGCCTACGGGTGGCACGGGGTGGCCATGGWGTGCAGAGTTGGTGGGACAGGGGACATCYAGGGGGCTCGAGATGTTGCT
rs1050757	X	153759858	rs1050757	G6PD	1	C	T	W1177	FAIL				literature_multiple	Sanger sequencing	AGATGTTGCTGGTGACAAGGAATGTCAAGTGGCACTGAGGCTGGCGGGCAAGGCCACAGGCAGATTCTCTCACGTGGGTGCTCGCCCYTTTCCTCCCCCT[C/T]GTCCCTYYCTCCCACCCTGGCCCCACTCAGGAGTGAGACCCAGTGGCCAATAAGCTCTGGGACAGACGAATGGGCGCCCTCCTCCTTCCTTCTGTTGGGC
G6PD_X_b36_153413455	X	153760261	CM973154	G6PD	1	A	C	W1175	GOOD	W1187	RE-PLEXED	W1198	literature		CGGGCGGCGGGAAGGAGGGTGGCCGTGGCGGGGGTGGAGGTGGGTGCCCAGGGCTCAGAGCTTGTGGGGGTTCACCCACTTGTAGGTGCCCTCATACTGG[A/C]AACCCACTCTCTTCATCAGCTCGTCTGCCTCCGTGGGGCCTCGGCTGGAGAGTGACGGGTGGAGGAGAGGCATGAGGTAGCTCCACCCTCACCCCGCCCC
G6PD_X_b36_153413623	X	153760429	rs77214077	G6PD	1	G	A	W1175	GOOD	W1187	RE-PLEXED	W1198	literature_multiple		AGGCATGAGGTAGCTCCACCCTCACCCCGCCCCTGCCCGCTGGGCTCTGTCCCCAGCCCCCACCCTTTCCTCACCTGCCATAAATATAGGGGATGGGCTT[A/G]GGCTTCTCCAGCTCAATCTGGTGCAGCAGTGGGGTGAAAATAYGCCAGGCCTCAMGGAGCTCGTCGCTGAGGGGACATRGTATGGCTTGGGAGGCCGGTG
G6PD_X_b36_153413666	X	153760472	rs72554664	G6PD	1	C	T	W1174	GOOD	W1186	DID NOT MULTIPLEX		literature_multiple		GCTCTGTCCCCAGCCCCCACCCTTTCCTCACCTGCCATAAATATAGGGGATGGGCTTRGGCTTCTCCAGCTCAATCTGGTGCAGCAGTGGGGTGAAAATA[C/T]GCCAGGCCTCAMGGAGCTCGTCGCTGAGGGGACATRGTATGGCTTGGGAGGCCGGTGGCACACAGGGAGGGAGGGCAAAGGCCACCCCATAGCCCACAGG
G6PD_X_b36_153413678	X	153760484	rs72554665	G6PD	1	C	A	W1176	GOOD	W1188	RE-PLEXED	W1198	literature_multiple		GCCCCCACCCTTTCCTCACCTGCCATAAATATAGGGGATGGGCTTRGGCTTCTCCAGCTCAATCTGGTGCAGCAGTGGGGTGAAAATAYGCCAGGCCTCA[A/C]GGAGCTCGTCGCTGAGGGGACATRGTATGGCTTGGGAGGCCGGTGGCACACAGGGAGGGAGGGCAAAGGCCACCCCATAGCCCACAGGTATGCAGGGGCC
rs2071429	X	153760508	rs2071429	G6PD	1	G	A	W1175	GOOD	W1187	RE-PLEXED	W1197	literature_multiple		ATAAATATAGGGGATGGGCTTRGGCTTCTCCAGCTCAATCTGGTGCAGCAGTGGGGTGAAAATAYGCCAGGCCTCAMGGAGCTCGTCGCTGAGGGGACAT[A/G]GTATGGCTTGGGAGGCCGGTGGCACACAGGGAGGGAGGGCAAAGGCCACCCCATAGCCCACAGGTATGCAGGGGCCGGCAGCTGGRCCTCACCTGCRCAC
G6PD_X_b36_153413788	X	153760594		G6PD	1	G	A	W1176	GOOD	W1188	DID NOT MULTIPLEX		Sanger sequencing		CGCTGAGGGGACATRGTATGGCTTGGGAGGCCGGTGGCACACAGGGAGGGAGGGCAAAGGCCACCCCATAGCCCACAGGTATGCAGGGGCCGGCAGCTGG[A/G]CCTCACCTGCRCACGAAGTGCATCTGGCTCCCGCAGAAGACGTCCAGGATGAGGCGCTCRTAGGCGTCAGGGAGCTTCACGTTCTGTGAGGGAGAGAGTG
G6PD_X_b36_153413799	X	153760605	rs398123546	G6PD	1	G	A	W1174	RE-designed	W1186	RE-PLEXED	W1197	literature_multiple		CATRGTATGGCTTGGGAGGCCGGTGGCACACAGGGAGGGAGGGCAAAGGCCACCCCATAGCCCACAGGTATGCAGGGGCCGGCAGCTGGRCCTCACCTGC[A/G]CACGAAGTGCATCTGGCTCCCGCAGAAGACGTCCAGGATGAGGCGCTCRTAGGCGTCAGGGAGCTTCACGTTCTGTGAGGGAGAGAGTGTCTTGCTGATG
rs2230037	X	153760654	rs2230037	G6PD	1	G	A	W1174	GOOD	W1186	RE-PLEXED	W1197	literature_multiple	Sanger sequencing	CCACCCCATAGCCCACAGGTATGCAGGGGCCGGCAGCTGGRCCTCACCTGCRCACGAAGTGCATCTGGCTCCCGCAGAAGACGTCCAGGATGAGGCGCTC[A/G]TAGGCGTCAGGGAGCTTCACGTTCTGTGAGGGAGAGAGTGTCTTGCTGATGCCACTGCCTGCCACCATGTGGAGTCCCCCGGGCCCAGGCCGCCCACCCT
G6PD_X_b36_153413991	X	153760797	rs186843026	G6PD	1	G	A	W1174	GOOD	W1186	DID NOT MULTIPLEX		Sanger sequencing		TTGCTGATGCCACTGCCTGCCACCATGTGGAGTCCCCCGGGCCCAGGCCGCCCACCCTCCACACTGCTCCTTCTCTGTAGGGCACCTTGTATCTGTTGCC[A/G]TAGGTCAGGTCCAGCTCCGACTCCTCGGGGTTGAAGAACATGCCCGGCTTCTTGGTCATCATCTTGGTGTACACGGCCTCGTTGGSCTGCACGCGGATCA
G6PD_X_b36_153414077	X	153760883	CM067413	G6PD	1	G	C	W1176	GOOD	W1188	RE-PLEXED	W1198	Sanger sequencing		TTGTATCTGTTGCCRTAGGTCAGGTCCAGCTCCGACTCCTCGGGGTTGAAGAACATGCCCGGCTTCTTGGTCATCATCTTGGTGTACACGGCCTCGTTGG[C/G]CTGCACGCGGATCACCAGCTCGTTGCGCTTGCACTGCTGGTGGAAGATGTCRCCGGCCACATCATGGAAYTGCAGCCTCACCTCGGCCTTGCGCTCGTTC
G6PD_X_b36_153414129	X	153760935	rs200195961	G6PD	1	G	A	W1177	FAIL				Sanger sequencing		ACATGCCCGGCTTCTTGGTCATCATCTTGGTGTACACGGCCTCGTTGGSCTGCACGCGGATCACCAGCTCGTTGCGCTTGCACTGCTGGTGGAAGATGTC[A/G]CCGGCCACATCATGGAAYTGCAGCCTCACCTCGGCCTTGCGCTCGTTCAGGGCCTTGCCGCAGCGCAGGATGAAGGGCACCCCTACGTGGCGGAAAGGGC
rs2230036	X	153760953	rs2230036	G6PD	1	C	T	W1174	GOOD	W1186	RE-PLEXED	W1198	literature_multiple		TCATCATCTTGGTGTACACGGCCTCGTTGGSCTGCACGCGGATCACCAGCTCGTTGCGCTTGCACTGCTGGTGGAAGATGTCRCCGGCCACATCATGGAA[C/T]TGCAGCCTCACCTCGGCCTTGCGCTCGTTCAGGGCCTTGCCGCAGCGCAGGATGAAGGGCACCCCTACGTGGCGGAAAGGGCAGCCTCAGCACCAGCTCT
rs34193178	X	153761160	rs34193178	G6PD	1	C	G	W1177	GOOD	W1189	DID NOT MULTIPLEX		literature		GTGTGGACCAGTGCGTGAGTGTCTCAGTGGGAGCTCCAGTGCCCGCACACAGGGCATGCCCAGTTCTGCCTTGCTGGGCCTCGAAGGCATCACCTACCAT[C/G]CCACCTCTCATTCTCCACATAGARGACGACGGCTGCAAAAGTGGYGGTGGTGGACCCGCGGGGCACCGTGGGGTCGTCCRGGTACCCTTTGGTGGCCTYG
G6PD_X_b36_153414378	X	153761184	rs137852342	G6PD	1	G	A	W1175	GOOD	W1187	RE-PLEXED	W1197	literature_multiple		CAGTGGGAGCTCCAGTGCCCGCACACAGGGCATGCCCAGTTCTGCCTTGCTGGGCCTCGAAGGCATCACCTACCATSCCACCTCTCATTCTCCACATAGA[A/G]GACGACGGCTGCAAAAGTGGYGGTGGTGGACCCGCGGGGCACCGTGGGGTCGTCCRGGTACCCTTTGGTGGCCTYGCCCTCTCCATCGGGGTTCCCCACG
G6PD_X_b36_153414399	X	153761205	rs5030869	G6PD	1	C	T	W1176	FAIL				Sanger sequencing		CACACAGGGCATGCCCAGTTCTGCCTTGCTGGGCCTCGAAGGCATCACCTACCATSCCACCTCTCATTCTCCACATAGARGACGACGGCTGCAAAAGTGG[C/T]GGTGGTGGACCCGCGGGGCACCGTGGGGTCGTCCRGGTACCCTTTGGTGGCCTYGCCCTCTCCATCGGGGTTCCCCACGTACTGGCCCAGGACCACATTG
hG6PD_968	X	153761240	rs76723693	G6PD	-1	A	G	W1174	GOOD	W1186	RE-PLEXED	W1198	literature_multiple	dbSNP	AAGGTGTTGAAATGCATCTCAGAGGTGCAGGCCAACAATGTGGTCCTGGGCCAGTACGTGGGGAACCCCGATGGAGAGGGCRAGGCCACCAAAGGGTACC[C/T]GGACGACCCCACGGTGCCCCGCGGGTCCACCACCRCCACTTTTGCAGCCGTCGTCCTCTATGTGGAGAATGAGAGGTGGSATGGTAGGTGATGCCTTCGA
G6PD_X_b36_153414531	X	153761337	rs137852327	G6PD	1	C	T	W1174	GOOD	W1186	RE-PLEXED	W1198	literature_multiple	Sanger sequencing	TCCRGGTACCCTTTGGTGGCCTYGCCCTCTCCATCGGGGTTCCCCACGTACTGGCCCAGGACCACATTGTTGGCCTGCACCTCTGAGATGCATTTCAACA[C/T]CTTGACCTGAGAGAAAGCCAAGGGAGAGAATGGGCTCCTTGGGTGTTGAGTTGGGGTGCAGGGATGACTGTGGCCACAGATGTGCAGCCCTCAGGGCAGG
G6PD_X_b36_153414709	X	153761515	rs183394670	G6PD	1	C	T	W1177	GOOD	W1189	RE-PLEXED	W1197	saunders_02	Sanger sequencing	AGATGTGCAGCCCTCAGGGCAGGAGGAGGCCCCTGCTTGGCTCTGCTCACCCTGCCAGAGGCCCAGCTCAGGGCCCCTCCCTGAGGACCCTCCAGGACCA[C/T]CCTGGTCCATCTCGAGTCTATTCTGATGAACAAGCTGAGGCCCAGAGARGCAATGGCCTTCCCTGGTCACATAGTGACTGTCAGGCCTGGGACATGACAA
G6PD_X_b36_153414758	X	153761564	rs73573478	G6PD	1	G	A	W1174	GOOD	W1186	RE-PLEXED	W1198	Sanger sequencing		CCCTGCCAGAGGCCCAGCTCAGGGCCCCTCCCTGAGGACCCTCCAGGACCAYCCTGGTCCATCTCGAGTCTATTCTGATGAACAAGCTGAGGCCCAGAGA[A/G]GCAATGGCCTTCCCTGGTCACATAGTGACTGTCAGGCCTGGGACATGACAACTTGGGCTTCATRACTGCCAGTCCAGGTCACCTCCGGGAGGCCACGCTG
rs5986990	X	153761628	rs5986990	G6PD	1	G	A	W1174	GOOD	W1186	RE-PLEXED	W1197	literature_multiple	Sanger sequencing	CGAGTCTATTCTGATGAACAAGCTGAGGCCCAGAGARGCAATGGCCTTCCCTGGTCACATAGTGACTGTCAGGCCTGGGACATGACAACTTGGGCTTCAT[A/G]ACTGCCAGTCCAGGTCACCTCCGGGAGGCCACGCTGTGCTCAGAGGTGGTGACTTCTCCGGGGTTGAGGACACCTGCTCTGCATGCACACCCCAGCTCAG
G6PD_X_b36_153414937	X	153761743	rs781934049	G6PD	1	T	C	W1176	GOOD	W1188	RE-PLEXED	W1198	Sanger sequencing		TCACCTCCGGGAGGCCACGCTGTGCTCAGAGGTGGTGACTTCTCCGGGGTTGAGGACACCTGCTCTGCATGCACACCCCAGCTCAGTGCCTCGTCACAGA[C/T]GGGCCTGCGACAGGGCATGCTCCTGGGGACTGGGGTGCACCCCCTACCTTCTCATCACGGACGTCATCTGAGTTGGWGGAGGCGGGCTTCTCCATGGCCA
G6PD_X_b36_153415014	X	153761820	CM014189	G6PD	1	T	A	W1174	GOOD	W1186	RE-PLEXED	W1197	literature		CCAGCTCAGTGCCTCGTCACAGAYGGGCCTGCGACAGGGCATGCTCCTGGGGACTGGGGTGCACCCCCTACCTTCTCATCACGGACGTCATCTGAGTTGG[A/T]GGAGGCGGGCTTCTCCATGGCCACCAGACACAGCATCTGCAGTAGGTGGTTCTGCATCACGTCCCTGGGGACGGAAGAGGCCAGAGCTCGCCTTAKCTCC
G6PD_X_b36_153415121	X	153761927	rs201589777	G6PD	1	T	C	W1177	GOOD	W1189	DID NOT MULTIPLEX		Sanger sequencing		GGGCTTCTCCATGGCCACCAGACACAGCATCTGCAGTAGGTGGTTCTGCATCACGTCCCTGGGGACGGAAGAGGCCAGAGCTCGCCTTAKCTCCCCGCCC[C/T]GTTCACCTGGTTCAAGGGCATGGGGACCCCAAACAAGGCTTCCTAGTGACAAGCTGCAAGACTCACTTCCTGATCCCCCTTRTCTTCCAGGTCCCCTTAA
G6PD_X_b36_153415203	X	153762009		G6PD	1	G	A	W1176	FAIL				Sanger sequencing		CGCCTTAKCTCCCCGCCCYGTTCACCTGGTTCAAGGGCATGGGGACCCCAAACAAGGCTTCCTAGTGACAAGCTGCAAGACTCACTTCCTGATCCCCCTT[A/G]TCTTCCAGGTCCCCTTAAATCAAGGAAGGACATGGTGATGCTATCACTGAATCATAAAACCGTGGRGTGCTTGGCTGTGTAGGGGTCCAGCCCTTTCCAG
rs2515905	X	153762075	rs2515905	G6PD	1	G	A	W1174	GOOD	W1186	RE-PLEXED	W1197	literature_multiple	Sanger sequencing	GACAAGCTGCAAGACTCACTTCCTGATCCCCCTTRTCTTCCAGGTCCCCTTAAATCAAGGAAGGACATGGTGATGCTATCACTGAATCATAAAACCGTGG[A/G]GTGCTTGGCTGTGTAGGGGTCCAGCCCTTTCCAGCCCGGTCTGATAGCTCAGACACTTAGGTTTTGAACTGCAGGGTGAGGAGGAGCTCCCCCAAGATAG
hG6PD_680	X	153762340	rs137852328	G6PD	-1	C	T	W1174	GOOD	W1186	RE-PLEXED	W1197	literature_multiple	dbSNP	CTCACATGTGGCCCCTGCACCACAGAGGCCCAAGGTCAGTTCCTCCACYTTGCCCCTCCCTGCAGATTTGCCAACAGGATCTTCGGCCCCATCTGGAACC[G/T]GGACAACATCGCCTGCGTTATCCTCACCTTCAAGGAGCCCTTTGGCACTGAGGGTCGCGGGGGCTATTTCGATGAATTTGGGATCATCCGGTGAGAGCTC
rs5986875	X	153762392	rs5986875	G6PD	1	G	A	W1176	GOOD	W1188	RE-PLEXED	W1198	Sanger sequencing		GTGCCAAAGGGCTCCTTGAAGGTGAGGATAACGCAGGCGATGTTGTCCMGGTTCCAGATGGGGCCGAAGATCCTGTTGGCAAATCTGCAGGGAGGGGCAA[A/G]GTGGAGGAACTGACCTTGGGCCTCTGTGGTGCAGGGGCCACATGTGAGGGGTCACCCTTGTCTGAGTTCTGGAGGAATTCGTCCTCGGGGAGGCAGTGGG
G6PD_X_b36_153415799	X	153762605	rs137852330	G6PD	1	G	A	W1175	GOOD	W1187	RE-PLEXED	W1197	literature_multiple		CCTGAGTACCACCCCCACCCTGGTCCCCCGGCCCAGGCTTGGCCCCACCTCAGCACCATGAGGTTCTGCACCATCTCCTTGCCCAGGTAGTGGTCGATGC[A/G]GTAGATCTGGTCCTCACGGAACAGRGAGRAGATGTGGTTGGACAGCCGGWCAGAGCTCTGCAGGTCCCTCCCGAAGGGCTTCTCCACGATGATGYGGTYC
G6PD_X_b36_153415828	X	153762634	rs5030868	G6PD	1	G	A	W1176	GOOD	W1188	RE-PLEXED	W1198	literature_multiple		GGCCCAGGCTTGGCCCCACCTCAGCACCATGAGGTTCTGCACCATCTCCTTGCCCAGGTAGTGGTCGATGCRGTAGATCTGGTCCTCACGGAACAGRGAG[A/G]AGATGTGGTTGGACAGCCGGWCAGAGCTCTGCAGGTCCCTCCCGAAGGGCTTCTCCACGATGATGYGGTYCCAGCYTCTGCTGGGAGCCCGGAGCTGCGT
hG6PD_542	X	153762655	rs5030872	G6PD	-1	T	A	W1174	GOOD	W1186	RE-PLEXED	W1198	literature_multiple	dbSNP	GAGGGTCATCTGGGAACACAAGGCACGGGAGGTGGCCACGGGGGCGAGGAGGTTCTGGCCTCTACTCCCCTGGGAGGGCGTCTGAATGATGCAGCTSTGATCCTCACTCCCCGAAGAGGGGTTCAAGGGGGTAACGCAGCTCCGGGCTCCCAGCAGAGGCTGGAACCGCATCATCGTGGAGAAGCCCTTCGGGAGGGACCTGCAGAGCTCTG[A/T]CCGGCTGTCCAACCACATCTYCTCCCTGTTCCGTGAGGACCAGATCTACCGCATCGACCACTACCTGGGCAAGGAGATGGTGCAGAACCTCATGGTGCTGAGGTGGGGCCAAGCCTGGGCCGGGGGACCAGGGTGGGGGTGGTACTCAGGAGCCTCACCTGGCCCACTGCCTCCCCGAGGACG
G6PD_X_b36_153415894	X	153762700	CM950500	G6PD	1	C	T	W1177	GOOD	W1189	DID NOT MULTIPLEX		literature		GATGCRGTAGATCTGGTCCTCACGGAACAGRGAGRAGATGTGGTTGGACAGCCGGWCAGAGCTCTGCAGGTCCCTCCCGAAGGGCTTCTCCACGATGATG[C/T]GGTYCCAGCYTCTGCTGGGAGCCCGGAGCTGCGTTACCCCCTTGAACCCCTCTTCGGGGAGTGAGGATCASAGCTGCATCATTCAGACGCCCTCCCAGGG
G6PD_X_b36_153415904	X	153762710	rs137852314	G6PD	1	C	T	W1175	GOOD	W1187	RE-PLEXED	W1198	literature_multiple		ATCTGGTCCTCACGGAACAGRGAGRAGATGTGGTTGGACAGCCGGWCAGAGCTCTGCAGGTCCCTCCCGAAGGGCTTCTCCACGATGATGYGGTYCCAGC[C/T]TCTGCTGGGAGCCCGGAGCTGCGTTACCCCCTTGAACCCCTCTTCGGGGAGTGAGGATCASAGCTGCATCATTCAGACGCCCTCCCAGGGGAGTAGAGGC
rs2515904	X	153762771	rs2515904	G6PD	1	G	C	W1174	GOOD	W1186	RE-PLEXED	W1197	literature_multiple	Sanger sequencing	CCCTCCCGAAGGGCTTCTCCACGATGATGYGGTYCCAGCYTCTGCTGGGAGCCCGGAGCTGCGTTACCCCCTTGAACCCCTCTTCGGGGAGTGAGGATCA[C/G]AGCTGCATCATTCAGACGCCCTCCCAGGGGAGTAGAGGCCAGAACCTCCTCGCYCCCGTGGCCACCTCCCGTGCCTTGTGTTCCCAGATGACCCTCTGGC
G6PD_X_b36_153416019	X	153762825		G6PD	1	C	T	W1177	GOOD	W1189	RE-PLEXED	W1198	Sanger sequencing		GGAGCTGCGTTACCCCCTTGAACCCCTCTTCGGGGAGTGAGGATCASAGCTGCATCATTCAGACGCCCTCCCAGGGGAGTAGAGGCCAGAACCTCCTCGC[C/T]CCCGTGGCCACCTCCCGTGCCTTGTGTTCCCAGATGACCCTCTGGCTCAACACCTTCCGGGAAGCCTTCCCACCCTGGGTGCCAGGGTRGCATTGCTGGC
G6PD_X_b36_153416108	X	153762914	rs73638302	G6PD	1	G	A	W1177	GOOD	W1189	DID NOT MULTIPLEX		Sanger sequencing		AACCTCCTCGCYCCCGTGGCCACCTCCCGTGCCTTGTGTTCCCAGATGACCCTCTGGCTCAACACCTTCCGGGAAGCCTTCCCACCCTGGGTGCCAGGGT[A/G]GCATTGCTGGCATGCTGCCGGGGGCCCGTTCCCCTCCTGCCTCATGCTGGGTCCCCSGTGGGTCTGAGTGGCCTGAAGGCCTGTAGGGGAGCAGGGGGAG
G6PD_X_b36_153416165	X	153762971	rs781975399	G6PD	1	A	NOT FOUND	W1176	GOOD	W1188	DID NOT MULTIPLEX		Sanger sequencing		CTCAACACCTTCCGGGAAGCCTTCCCACCCTGGGTGCCAGGGTRGCATTGCTGGCATGCTGCCGGGGGCCCGTTCCCCTCCTGCCTCATGCTGGGTCCCC[C/G]GTGGGTCTGAGTGGCCTGAAGGCCTGTAGGGGAGCAGGGGGAGGAGGCATCCAAGCCATGGCTTCCTCATTGGTTTTGAAAATGAGAAGAGGACCTTTGC
G6PD_X_b36_153416473	X	153763279		G6PD	1	T	C	W1176	GOOD	W1188	DID NOT MULTIPLEX		Sanger sequencing		TGCGGCCTGGCCGGGCCTTTGGGGAAGCAGAGCGGAAAGGCGGTGTTTCGTGGAGCAACGCTGCCACCTTGTGGTCCCGCTGGGGATGGCCCCGGCACCA[C/T]GGATGCTGCCCAGATCCCCGGCCCCGGACACGCTCATAGAGTGGTGGGAGCACTGCCTGGGCCAGCCTGGCAGGCGGGAAGGGAGGGCAACGGCAAGCCT
G6PD_X_b36_153416596	X	153763402	rs137852313	G6PD	1	C	T	W1176	GOOD	W1188	DID NOT MULTIPLEX		literature		CCCGGACACGCTCATAGAGTGGTGGGAGCACTGCCTGGGCCAGCCTGGCAGGCGGGAAGGGAGGGCAACGGCAAGCCTTACATCTGGCTCATGCAGGACT[C/T]GTGAATGTTCTTGGTGACGGCCTCGTAGACGGTCGGGGGCAAGGCCAGGTAGAAGAGGCRGTTGGCCTGTGACMCCAGGTGGRGGGCATYCATGTGGCTG
G6PD_X_b36_153416656	X	153763462	CM970547	G6PD	1	G	A	W1175	GOOD	W1187	RE-PLEXED	W1198	literature		GAGGGCAACGGCAAGCCTTACATCTGGCTCATGCAGGACTYGTGAATGTTCTTGGTGACGGCCTCGTAGACGGTCGGGGGCAAGGCCAGGTAGAAGAGGC[A/G]GTTGGCCTGTGACMCCAGGTGGRGGGCATYCATGTGGCTGTTGAGGCGCTGGTAGGAGGCTGCATCATYGTACTGGCCAGCCACATAGGAGTTGCGGGCA
G6PD_X_b36_153416670	X	153763476	rs137852341	G6PD	1	C	A	W1177	GOOD	W1189	DID NOT MULTIPLEX		literature_multiple		GCCTTACATCTGGCTCATGCAGGACTYGTGAATGTTCTTGGTGACGGCCTCGTAGACGGTCGGGGGCAAGGCCAGGTAGAAGAGGCRGTTGGCCTGTGAC[A/C]CCAGGTGGRGGGCATYCATGTGGCTGTTGAGGCGCTGGTAGGAGGCTGCATCATYGTACTGGCCAGCCACATAGGAGTTGCGGGCAAAGAAGTCCTCCAG
G6PD_X_b36_153416679	X	153763485	rs78365220	G6PD	1	A	G	W1174	GOOD	W1186	RE-PLEXED	W1197	literature_multiple		CTGGCTCATGCAGGACTYGTGAATGTTCTTGGTGACGGCCTCGTAGACGGTCGGGGGCAAGGCCAGGTAGAAGAGGCRGTTGGCCTGTGACMCCAGGTGG[A/G]GGGCATYCATGTGGCTGTTGAGGCGCTGGTAGGAGGCTGCATCATYGTACTGGCCAGCCACATAGGAGTTGCGGGCAAAGAAGTCCTCCAGCTTGAGCTT
hG6PD_plus376	X	153763492	rs1050829	G6PD	1	T	C				Not added to multiplexes as already typed		dbSNP	literature_multiple	ATGCAGGACTYGTGAATGTTCTTGGTGACGGCCTCGTAGACGGTCGGGGGCAAGGCCAGGTAGAAGAGGCRGTTGGCCTGTGACMCCAGGTGGRGGGCAT[C/T]CATGTGGCTGTTGAGGCGCTGGTAGGAGGCTGCATCATYGTACTGGCCAGCCACATAGGAGTTGCGGGCAAAGAAGTCCTCCAGCTTGAGCTTCTCCTCT
G6PD_X_b36_153417405	X	153764211	rs137852349	G6PD	1	A	G	W1174	GOOD	W1186	RE-PLEXED	W1198	literature		GAGGGCAGAACCAGGCTGGGGGAGGCCCTGACACCACCCACCTTGAAGAAGGGCTCACTCTGTTTGCGGATGTCAGCCAMTGTGAGGCGGGAACGGGCAT[A/G]GCCCAYGATGAWGGTGTTTTCGGGCAGAAGGCCATCCCGGAACAGCCACCTGAGGGCAGGGCACAGCTGTAACCAGTGCGGGCAGGGCAGGACCAGGCCT
hG6PD_plus202	X	153764217	rs1050828	G6PD	1	C	T	W1176	GOOD	W1188	DROPPED from final as already typed		dbSNP	literature_multiple	AGAACCAGGCTGGGGGAGGCCCTGACACCACCCACCTTGAAGAAGGGCTCACTCTGTTTGCGGATGTCAGCCAMTGTGAGGCGGGAACGGGCATRGCCCA[C/T]GATGAWGGTGTTTTCGGGCAGAAGGCCATCCCGGAACAGCCACCTGAGGGCAGGGCACAGCTGTAACCAGTGCGGGCAGGGCAGGACCAGGCCTGTCCCT
G6PD_X_b36_153417417	X	153764223	CM052878	G6PD	1	A	T	W1175	GOOD	W1187	RE-PLEXED	W1198	literature_multiple		AGGCTGGGGGAGGCCCTGACACCACCCACCTTGAAGAAGGGCTCACTCTGTTTGCGGATGTCAGCCAMTGTGAGGCGGGAACGGGCATRGCCCAYGATGA[A/T]GGTGTTTTCGGGCAGAAGGCCATCCCGGAACAGCCACCTGAGGGCAGGGCACAGCTGTAACCAGTGCGGGCAGGGCAGGACCAGGCCTGTCCCTGGCGGG
G6PD_X_b36_153417577	X	153764383	rs78478128	G6PD	1	G	C	W1175	GOOD	W1187	DID NOT MULTIPLEX		literature_multiple		ACCAGTGCGGGCAGGGCAGGACCAGGCCTGTCCCTGGCGGGAGGTCACAGGGGCAGTGGTGGGACACACTTACCAGATGGTGGGGTAGATCTTCTTCTTG[C/G]CCAGGTCACCCTGTGGCAGAGGGAACAGGTGTGTGGTTAGAAGTGGCTGGGGACACGACCTACATACATCATCCTCCACCCTTGGTGATCTGGGCACTAC
rs762515	X	153764528	rs762515	G6PD	1	T	C	W1174	GOOD	W1186	RE-PLEXED	W1197	literature_multiple	Sanger sequencing	GGCTGGGGACACGACCTACATACATCATCCTCCACCCTTGGTGATCTGGGCACTACTCAGGATCACTACTGGGCCACAAGCATGTCTGTCTTGCCTGATA[C/T]ACAGACAGAAGAGCCCCGAGATTCAAGCCTGTGCCAGCCCTCCATCCCTGACCCAGAAGACATAAACGCATCTCCTGCGTTCCAGGAGAAAACCTGAAAA
rs762516	X	153764663	rs762516	G6PD	1	C	T	W1176	GOOD	W1188	RE-PLEXED	W1198	literature_multiple		CAGCCCTCCATCCCTGACCCAGAAGACATAAACGCATCTCCTGCGTTCCAGGAGAAAACCTGAAAATTCAATTCAGTAGAACCAAGGGACGACAGAAGTA[C/T]CATGTAGCCACATTTGTGAGACGTGACCTCAAGTGCTTACATTAGCAAAAAAGAGTGGTTCAAAAATAAGRAGCTAAGCATTCCACTTAAGAAGTGAGAA
rs762517	X	153764734	rs762517	G6PD	1	G	A	W1174	GOOD	W1186	DID NOT MULTIPLEX		literature_multiple		TTCAGTAGAACCAAGGGACGACAGAAGTAYCATGTAGCCACATTTGTGAGACGTGACCTCAAGTGCTTACATTAGCAAAAAAGAGTGGTTCAAAAATAAG[A/G]AGCTAAGCATTCCACTTAAGAAGTGAGAAAAAGGGCCAGATGCGGTGGCTCACACCTGTAATCCCAGCACTTTGGGAGGCTGAGGCAGGCAGATCACCTG
rs743544	X	153765166	rs743544	G6PD	1	G	A	W1177	GOOD	W1189	DID NOT MULTIPLEX		dbSNP		GATAGAACTGCAAGCCAAATTACCAGGAAGAAAATAGGAAATAATGACAAGTAAAATTAATAAAATTAAAAGCTAACCCAAAGAAAAGATGAACAAAGCT[A/G]GAAATTGGTGTTTGAAAAAGACGAATAGAAACAGACAACCCCCTGGCATGGTTGCTTTTTTAAAAGGGCATAGGCCGGGCACAGTGGCTTACTCCTGTAA
rs28613671	X	153765534	rs28613671	G6PD	1	C	A	W1174	FAIL				dbSNP		CACTTGAACCCGGGAGATGGAGGTTGCAGTGAGCCAAGATTGCACCATTGCACCCCAGCCTGGGCGACAAGAGTGAAACTCCGTCTCAAAAAMMAAAAAM[A/C]AAAAAAACAACTAAACAGCTGGACGCGGTGGCTCAAGCCTATAATCCCAGCACTTTGGAAGGCCGAGGCGGATGGATTACCTGAGTTCGGGAGTTCAAGA
rs7881468	X	153766499	rs7881468	G6PD	1	A	G	W1177	GOOD	W1189	DID NOT MULTIPLEX		dbSNP		GGGTTTCCCCATGTTGTCCAGGCTGCTCTTGAACTCCTGGGCTCAAGTGATCTGCCCGCCTCAGCCTCCCAAAGTGTTGGGATTACAGGCGTGAGCCACG[A/G]CGACCCACTGACCCTGTCTCTTTAAAAAAAAAGAAGAAAACATCAGCAAACCAAATCCTGCAATGTTAAAAACGGTAGGTTTTTTATTTACAGAATAAAT
G6PD_X_b36_153422839	X	153769645	rs782054572	G6PD	1	C	A	W1174	GOOD	W1186	DID NOT MULTIPLEX		Sanger sequencing		CTCAGGCCCTGCAACCGACCGACCGTCTGCTGGGCTCCAAGTCACCTGAGAGGCGAGGTGAGGTAAGACGGACAGTAGGGGTGGGGTAAGGCAGGCCGCT[A/C]TCTCCCATGGTGACAGGGAGCTAAGCTGAGCTGAGCCGGACTGAGCTGCTCTCCTCAGGACTCAGGGGTAGCCCTGCCCTCCCAGCTGGCTGCGATGCTC
G6PD_X_b36_153423083	X	153769889	rs73641103	G6PD	1	G	A	W1176	GOOD	W1188	RE-PLEXED	W1198	Sanger sequencing		AACCTGACAGCTTGGTCAAGAGTCTACTCGTGCCATGTGGGTGGGGGCAATTCAAGGGGTCCTTAGTGAAAAGCAGTTGGGAGCTTCTCATCTTCCCCAC[A/G]CCCTCCTCTTTCCTGAGGACCACAGCAGGGGAGGGATCTGCCCAAGGACACAAGGTGACTTAGTAGAAGCAGGGCATGATGAAGATCTCTAGCCACCAAC
G6PD_X_b36_153423752	X	153770558	rs782789442	G6PD	1	C	T	W1175	GOOD	W1187	DID NOT MULTIPLEX		Sanger sequencing		TCCTGAACGCCCATCAAGCCCATGGCCCTTGTGATCCAGGTGGGGAAACTAAGGCCCAGAGAAGTGAGGACCCCGCAGACTATCAATCCCAGTCTCTTCC[C/T]CTCACTCCCTGTGAAGCTCTCCAGCATCATCGAGGTCCCATCAGGTGGGGAARGATGCTGTTCCAGGCGCACACTAGTCTACAAGGCCAGAGCTTTCTGG
G6PD_X_b36_153424232	X	153771038	rs193062832	G6PD	1	T	C	W1174	GOOD	W1186	RE-PLEXED	W1197	Sanger sequencing		TCGGGGCTCCGGGCATTTGCTCTTCCTTCTGTGTTTGTGCTCTCCCGGCCCTCTTTGTGGGATCTATGCGCTTTGGGGGACTGGGGACACAGGGCCCATG[C/T]GTATCTTCTGAAACACACGTCAGCCTGAACTCTTGCTGGTCTGCTTACTTGCCGTGGTTCCCTGGCCGCAATAGCACATAGGTCCCRTGAGGAGGGCAGG
G6PD_X_b36_153424319	X	153771125	rs73573488	G6PD	1	A	G	W1175	GOOD	W1187	RE-PLEXED	W1198	Sanger sequencing		CACAGGGCCCATGYGTATCTTCTGAAACACACGTCAGCCTGAACTCTTGCTGGTCTGCTTACTTGCCGTGGTTCCCTGGCCGCAATAGCACATAGGTCCC[A/G]TGAGGAGGGCAGGGACTGGCTGCTRTGGCCCAGAAGTACCCAATCGCTGTCTGCTCAATGAACGGAGAAYGGGCTGCTTTCCTGGAACAGCAGATTCTAG
G6PD_X_b36_153424389	X	153771195	rs111615979	G6PD	1	C	T	W1175	GOOD	W1187	DID NOT MULTIPLEX		Sanger sequencing		GTTCCCTGGCCGCAATAGCACATAGGTCCCRTGAGGAGGGCAGGGACTGGCTGCTRTGGCCCAGAAGTACCCAATCGCTGTCTGCTCAATGAACGGAGAA[C/T]GGGCTGCTTTCCTGGAACAGCAGATTCTAGGATCACGTGCCCTCAAGTGCCACCCTGCCTACCTCCYGCACCGAGTGAGGCATCAGGCGTGGAAGAAGCC
G6PD_X_b36_153424456	X	153771262		G6PD	1	C	T	W1177	GOOD	W1189	DID NOT MULTIPLEX		Sanger sequencing		TACCCAATCGCTGTCTGCTCAATGAACGGAGAAYGGGCTGCTTTCCTGGAACAGCAGATTCTAGGATCACGTGCCCTCAAGTGCCACCCTGCCTACCTCC[C/T]GCACCGAGTGAGGCATCAGGCGTGGAAGAAGCCYGGGAGCCGGAGCTGTTCCAGGTGCTGCCTGAGCACGCCACCTCCCATCTCCCCCMCAGCAGGAAGA
rs2472393	X	153771296	rs2472393	G6PD	1	T	C	W1175	GOOD	W1187	RE-PLEXED	W1197	Sanger sequencing		GGGCTGCTTTCCTGGAACAGCAGATTCTAGGATCACGTGCCCTCAAGTGCCACCCTGCCTACCTCCYGCACCGAGTGAGGCATCAGGCGTGGAAGAAGCC[C/T]GGGAGCCGGAGCTGTTCCAGGTGCTGCCTGAGCACGCCACCTCCCATCTCCCCCMCAGCAGGAAGAGGAAAAAACAAACCACGAGGCTCTTCAGAGAGAG
rs2515910	X	153771584	rs2515910	G6PD	1	G	A	W1177	GOOD	W1189	DID NOT MULTIPLEX		dbSNP		AGAGCAAAGGGGAACCCTACTGATTTCAACAAAACAAAGTTGCCCAACCCGAAGCTGGCCACAGGCGGAGGCAGTGAAATGACAAAATCAGCTTGGAAAA[A/G]CCTAAGGACCCTGGGCCCTCGTTTCAAAAGCTGTCATTTGCTACACGAAATGCTGAGGTTCAGGAAAAGGAAGACACTTGCTCCAACTCACACAGCAAGC
rs61309512	X	153772748	rs61309512	G6PD	1	G	A	W1177	FAIL				dbSNP		TACAGATGTGAGCCACTGCGCCCAGCCAATTTTTGTATTTTAAGTAGAGACTGGGTTTCGCCATGTTGGCCAGGCTGGTGTCAAACTCCTGACCTCAGGC[A/G]ATCCACCTGCCTCGGCCTCCCAAAGTGCTGGGAATACAGGCGTGAGCCACCGTGCCCGGCCAGGTATGGCTCTTCTGAGGGGACCAGGCTGGGGCTGGGG
G6PD_X_b36_153426256	X	153773062	rs113492957	G6PD	1	C	T	W1174	GOOD	W1186	RE-PLEXED	W1197	Sanger sequencing		TCTCCCTCGGCTGCCTCCTCATTCCCTTTTGGCTCTCCTTTTCTAAGTTCTGATCAGAAGTACAAAGGTGTCAAGGAGTAGGTTTGACAAAGTGTGACAG[C/T]GCGTTGTTCTATGTGAACAAAGAACCACTGAGCTCAGCCAGCACTGAGGGGCGCACRATGTGGAAGAACTAACTAGTTTTGATAGAGCTCCTGCTCAMGG
G6PD_X_b36_153426313	X	153773119		G6PD	1	G	A	W1175	GOOD	W1187	RE-PLEXED	W1198	Sanger sequencing		AAGTACAAAGGTGTCAAGGAGTAGGTTTGACAAAGTGTGACAGYGCGTTGTTCTATGTGAACAAAGAACCACTGAGCTCAGCCAGCACTGAGGGGCGCAC[A/G]ATGTGGAAGAACTAACTAGTTTTGATAGAGCTCCTGCTCAMGGTTACAAGGTAAGTTAATGGCAAAGATGGTCATACAGTAATGAGCASAGAGATTCTTG
G6PD_X_b36_153426354	X	153773160	rs149902811	G6PD	1	A	C	W1174	GOOD	W1186	RE-PLEXED	W1197	Sanger sequencing		AGYGCGTTGTTCTATGTGAACAAAGAACCACTGAGCTCAGCCAGCACTGAGGGGCGCACRATGTGGAAGAACTAACTAGTTTTGATAGAGCTCCTGCTCA[A/C]GGTTACAAGGTAAGTTAATGGCAAAGATGGTCATACAGTAATGAGCASAGAGATTCTTGAGTGCATCCAGGGTTAAAAGTGAAAACTGAGACCACGTGTA
G6PD_X_b36_153426402	X	153773208		G6PD	1	G	C	W1175	GOOD	W1187	DID NOT MULTIPLEX		Sanger sequencing		GAGGGGCGCACRATGTGGAAGAACTAACTAGTTTTGATAGAGCTCCTGCTCAMGGTTACAAGGTAAGTTAATGGCAAAGATGGTCATACAGTAATGAGCA[C/G]AGAGATTCTTGAGTGCATCCAGGGTTAAAAGTGAAAACTGAGACCACGTGTAATTTGAGATGAAGCCCTTGTTCCACCAGCCCCTGCACAGTCTCACTGC
rs11797720	X	153773439	rs11797720	G6PD	1	T	C	W1176	GOOD	W1188	DID NOT MULTIPLEX		dbSNP		CTCGGGCGATGGCTGTCCTAGGACCACCCCTCCCTCCCCTCCCATGGAAATCCTCATGCTATACTATTCTTTTGTCTTTCCTATGAGTGCAGAATGGCGG[C/T]TCTACAAGCTGGACAATTGGGGCCAGGTGGGGTGAGGCAGAGCTCCTTGGTAGGCTTTCGAAATTGAGGCAAAGAGACAGTGTTCARAGAAAAGCTAAGT
G6PD_X_b36_153426720	X	153773526	rs145036913	G6PD	1	A	G	W1174	GOOD	W1186	RE-PLEXED	W1197	Sanger sequencing		TGCAGAATGGCGGYTCTACAAGCTGGACAATTGGGGCCAGGTGGGGTGAGGCAGAGCTCCTTGGTAGGCTTTCGAAATTGAGGCAAAGAGACAGTGTTCA[A/G]AGAAAAGCTAAGTGTTTGTATCGACGGAACTTGAAGTGTTAGTGAAGAGGCAGAGATCAGGCCTCAGATCCTGCCTTTGGAACTCATTTGTTAAGGCATG
G6PD_X_b36_153426966	X	153773772		G6PD	1	G	C	W1175	FAIL				Sanger sequencing		CCCAAGAAGTCCATCTAGACAGTCCCTAAAGAGCCTGCAACTCCAGGATTAAGGGCTACATTCAGCGGCTAGGCACAGGGTTCAGAAACGTCCTGCAGCC[C/G]GGCGTGGTGGCTCATGCCTGTCATCCCAGCACTTTGGGAGGCCGAGGCGGRCGGATCACTTGAGGTCAGGAGTTTGAGACCAGCCTGGTCAACATGGTGA
G6PD_X_b36_153427017	X	153773823	rs781842888	G6PD	1	G	A	W1176	FAIL				Sanger sequencing		AGGGCTACATTCAGCGGCTAGGCACAGGGTTCAGAAACGTCCTGCAGCCSGGCGTGGTGGCTCATGCCTGTCATCCCAGCACTTTGGGAGGCCGAGGCGG[A/G]CGGATCACTTGAGGTCAGGAGTTTGAGACCAGCCTGGTCAACATGGTGAAACTCCGTCTCTACTAACAATACAAAAATTAGCCGGGTGTGGTGGTGCATG
rs7064060	X	153773998	rs7064060	G6PD	1	C	T	W1177	FAIL				dbSNP		AAATTAGCCGGGTGTGGTGGTGCATGCCTGTAATCTCAGCTACTTGGGGGGCTGAGGCAGGAGAATCGCTTGAACCCAGGAGGCCGAGGTTGCAGTGAGC[C/T]AAGATGGCRCCACTGCACCCCATCCTGGGCGACCAGAGCAAAACTCCGTCTCCAAAAAAAAAAAAAAAAAAAAGTCTTGCAAGTGCATATGCACACCAGG
G6PD_X_b36_153427408	X	153774214		G6PD	1	T	C	W1177	GOOD	W1189	RE-PLEXED	W1198	Sanger sequencing		CCTGGCGCACTAGCAGGAGCGGGAGGAGGAGCTCAACTTAGCAGAGCCTGTGGGGCCCTGCAACAATTAGTTGGAAAAGCTGAGGCATGGAGCAGGCACT[C/T]CCTGGCTTTTAAGATTGGGGCCTGGGAGATACTCACCGATGCACCCATGATGATGAAYATGYGTGTATCCGACTGATGGAAGGCATCGCCCTGGAAAAGC
G6PD_X_b36_153427466	X	153774272	CM950495	G6PD	1	T	C	W1174	GOOD	W1186	RE-PLEXED	W1197	literature_multiple		TGCAACAATTAGTTGGAAAAGCTGAGGCATGGAGCAGGCACTYCCTGGCTTTTAAGATTGGGGCCTGGGAGATACTCACCGATGCACCCATGATGATGAA[C/T]ATGYGTGTATCCGACTGATGGAAGGCATCGCCCTGGAAAAGCTCTTCCCGCAGGATCCCGCACACSTGGGTCCGGCTCAGGGCCACCTGCTCTGCCATGA
G6PD_X_b36_153427470	X	153774276	rs137852340	G6PD	1	T	C	W1175	GOOD	W1187	DID NOT MULTIPLEX		literature_multiple		ACAATTAGTTGGAAAAGCTGAGGCATGGAGCAGGCACTYCCTGGCTTTTAAGATTGGGGCCTGGGAGATACTCACCGATGCACCCATGATGATGAAYATG[C/T]GTGTATCCGACTGATGGAAGGCATCGCCCTGGAAAAGCTCTTCCCGCAGGATCCCGCACACSTGGGTCCGGCTCAGGGCCACCTGCTCTGCCATGACGCT
G6PD_X_b36_153428979	X	153775785	rs111827785	G6PD	1	C	T	W1174	GOOD	W1186	RE-PLEXED	W1197	Sanger sequencing		AGCTTCCGCGGGCCTGCAGAGCCTGGCGGACTCAGACTTCTCTCCGGAGCGGGATGCGGCCCTACCGCGGCCTCACACTTCTCGCCGGCTTCCCGAGTTC[C/T]CGGGGGCGGGGCTTGTGTTTTTACTTCCGGATCCCACAGCTATGACACCGGAAGCCGGAAGCGTGGTAGGGAAGGGCGACCGCGAAACTGGGACTTTCTC
G6PD_X_b36_153429253	X	153776059	rs782425753	G6PD	1	C	T	W1176	GOOD	W1188	DID NOT MULTIPLEX		Sanger sequencing		AGGTGTGGTCCTTTTCCCCAAAGACAGGGTTCCATCCGTGGGCGTTCCGCCGCCTCCGAAACTTCCCCCGGACGTTCAGGCTCCCCCCTCTTTTTTGGGC[C/T]CCAGCCCGTTCCTGCTCCGCGCTTCTGGAGYACTGGCCAAGGCGGGCMGATTCAGGACCCAGGTTACTTGGGCGGCGAGCTGGACTGTTTCTACTSCTCC
rs56191948	X	153776090	rs56191948	G6PD	1	C	T	W1177	GOOD	W1189	DID NOT MULTIPLEX		dbSNP		CCATCCGTGGGCGTTCCGCCGCCTCCGAAACTTCCCCCGGACGTTCAGGCTCCCCCCTCTTTTTTGGGCYCCAGCCCGTTCCTGCTCCGCGCTTCTGGAG[C/T]ACTGGCCAAGGCGGGCMGATTCAGGACCCAGGTTACTTGGGCGGCGAGCTGGACTGTTTCTACTSCTCCCTCCTCCTCCACTGCGGKGTCTGACCCTACT
rs5986992	X	153776107	rs5986992	G6PD	1	C	A	W1174	GOOD	W1186	RE-PLEXED	W1198	Sanger sequencing		GCCGCCTCCGAAACTTCCCCCGGACGTTCAGGCTCCCCCCTCTTTTTTGGGCYCCAGCCCGTTCCTGCTCCGCGCTTCTGGAGYACTGGCCAAGGCGGGC[A/C]GATTCAGGACCCAGGTTACTTGGGCGGCGAGCTGGACTGTTTCTACTSCTCCCTCCTCCTCCACTGCGGKGTCTGACCCTACTCCTTGTGTGAGGACTCC
G6PD_X_b36_153429371	X	153776177	rs73641104	G6PD	1	G	T	W1175	FAIL				Sanger sequencing		CGCGCTTCTGGAGYACTGGCCAAGGCGGGCMGATTCAGGACCCAGGTTACTTGGGCGGCGAGCTGGACTGTTTCTACTSCTCCCTCCTCCTCCACTGCGG[G/T]GTCTGACCCTACTCCTTGTGTGAGGACTCCTCTAGTTCAGAGACATATTCTGTTCACCAAACTTGACTGCGCTCTATCGAGGTCGTTAAATTCTTCGGAA
G6PD_X_b36_153429686	X	153776492		G6PD	1	G	T	W1174	GOOD	W1186	RE-PLEXED	W1197	Sanger sequencing		GCTCTCCTGGCACATTAGAGGAATAGCACGGAGGTCACTATAGCTGGAGCAGAGTGAGGGAGGGGAGCACAGTTGGAGAGGAAGGGATGGGGAACCCGAT[G/T]GTACAGGGCCTTGTAGGCCGTTGTAGGGAGATTGGCTTTTACGCAGAAGGCAACGGGGATCCATGGTAGGGTTCTCAGTAGAGGAGGAATGTGATCGGAA
G6PD_X_b36_153430003	X	153776809	rs149618083	G6PD	1	C	T	W1174	FAIL				Sanger sequencing		CTTTGAGCATTTTATTATTGGAAATTTCAAAAATGTACGAAAGTAGAAAAATGAGTATAGTAAATCTTTTTGGTTTGTTTGTTTTTGAGAGATGGAGTCT[C/T]GCTCTGTCGCCCAGGCTGGAGTGCAGTGGCATGATCTCAGCTCACTCTAACCTCCTCCTCCTGGGTTCAAGCGATTCTCCTGCCTCAGCTTCCCAGGTAG
rs60589782	X	153777399	rs60589782	G6PD	1	T	C	W1175	GOOD	W1187	DID NOT MULTIPLEX		dbSNP		TGGATTCAAGCGATTCTTCTGCCTCAGCCGCTGGGACTACAGTTGTGCACCACCACGCCCAGCTAATTTTTGTATTTTTAGTAGAGATGGGGTTTCATCA[C/T]GTTGGCCAGGATGGTCTTGATCTCTTGACCTTGTCATCCGCCCGCCTCGGCCTCCCAAAGTGCTGGGATTACAGGCATGAGCCACCGCGCCCGGCCTCTT
rs12837628	X	153777565	rs12837628	G6PD	1	C	G	W1176	GOOD	W1188	DID NOT MULTIPLEX		dbSNP		GGATTACAGGCATGAGCCACCGCGCCCGGCCTCTTTTTTTGAGACCCAGTCTCACTCTGTCGCCCAGAATGGAGTGCAGTGGCACGATCTTGGCTCACCG[C/G]AACCTCCATCTCCCAGGTTTGAGCGATTCTCCTGCCTCAGCTTCCCAAATAGCTGGGATTACAGGCATGCACCATCACTCCCAGCTATTTTTTTTTTTTT
rs4256746	X	153778629	rs4256746	G6PD	1	G	A	W1175	GOOD	W1187	DID NOT MULTIPLEX		dbSNP		GCTGGAGGATGGATTCGCCATCAGCTGATAACAAAGAAGGCCTTGGGTAGATCTGGGTTTTGGGGACTGTCGGAGGTCTTAGAGAGGTTCGTTTTGAGAA[A/G]GCTACTAGATAACCAAGTAGAAATGTCGAGTTTGATAAATGAATGTGGAGTTTAGAAAAGAGGTCTAATTAAGCATCAAGATTGGAGTTCAAGGCATGAG
rs12861291	X	153778854	rs12861291	G6PD	1	G	C	W1175	GOOD	W1187	DID NOT MULTIPLEX		dbSNP		GAATGAAGTTACAGAGAAGAAGATGTCCTAGGACAGAGCCCTGGGGCAGCCCAACATGAAGGATGGGAACCCAGTGAGAGTGCCTGGGCAGGAGTAGCCA[C/G]CAAGATAGGGAGGAAACCAGGAGAAGGGGCTGTTCTGAAAGCCAAGGGTGGAGTGCAGTGGCACAATCTCAGCTCACTGCAACGTCCGCCTCCTGGGTTC
rs5986993	X	153781367	rs5986993	G6PD	1	G	A	W1176	FAIL				dbSNP		GGAGGGGCGGCATAGACTCCCCACATGGCTCACTGGGTGTGGTGGGGCCTGTAGCCCTTTTTGTTTCATCCTTTGGTTCCTGCTGGGGACTCAGGCCTAA[A/G]TGTCCACCCCATCGTGGAGGACAACACCCCTTCCTTGCAGGAGTCATCCCTGAGCTGGCAGCTTCAATTGGCTCTCCGTGTCCTGGCTGGCTGGCAGCTC
rs6643680	X	153781876	rs6643680	G6PD	1	C	T	W1176	GOOD	W1188	DID NOT MULTIPLEX		dbSNP		GCCCTGCTGGAGCATGGAGACCCAACATGACCTGCCTGTTCCAGGACAGGGTCCCCCACCTCAGTGCCATCGGCACCTGGGGCTGGAGAATTCTCTTGTA[C/T]GTTGTAGGGTGTGGAGCAGAGTCCCTGGCCTGTACCTGCTAGATGCCAGTAGCACCTGTCCTGTTGTGACAACTAACAATATCCCCAGATATTTATTGCC
rs4323635	X	153800662	rs4323635	G6PD	1	G	T	W1175	FAIL				dbSNP		ATTCCTTCCTTTCCTCCCTTCCTCCCTCCCTCCCTCCCTCCCTCCCTYCCTTCCTTCCTTCCTTCCTTCCTTCCTTACGTTTTTTAACAGTAGAGACAGG[G/T]TCTCACTGTGTTGCCCAGGCTGGACTCGAACTCCTGGAAATCAAGTGATCCTCCCACCTGGGCCTCCCCAAATGCTGGGATTACAGGCTTGAGAACTGGC
rs12116261	X	153819976	rs12116261	G6PD	1	G	A	W1175	FAIL				dbSNP		CATCATGTTGGCCAGGCTGGTCTCAGACTCTTGACGTCAAATGATCCACCCACCTTGGTCTCCTAAAATGCTGGGATTACAGGCGTGAGCCACCCTGCCC[A/G]GCCTCCTTCTTTAGTTTTTAAAGAAAAATTAAAACAATGATTTTTTTTTCCATCTGATTGGCAAAAATTTAAATAATTCCCATCAGTTCAGCAAGGATGT
rs61079577	X	153820491	rs61079577	G6PD	1	G	A	W1175	FAIL				dbSNP		CCCACCCACATCTGATCTTGAAGTGTGGCTCCCATAATTCCCACGTGCCATGGGAGGGACCTGGTGGGAGGTAACTGAATCATGGGGGCGGATGTTTCCC[A/G]TGCTGTTCTCGTGATAGTGAATAAGTCTCATGAGATCTGACGGTTTCATGAAGGGGAGTTCCCCTGCACATGCTCTCTTGACTGCCACCACGTAAGATGT
rs56368797	X	153821207	rs56368797	G6PD	1	A	G	W1175	FAIL				dbSNP		GTTGGCTTTCCATGCCATGTCCCTTTCTTCTTGTGTCTCCTTTTGGTGGCCTGGCATGAGGGGGTGGTGTAATTGAGCTAGCTTTCACCACTGAGACAAC[A/G]CCACAGGGGAAGGGCAAGAAGGCAGCCAGACAGACCAAGGTCTCCACAGAGGTACTGCATCTGGAGATCATTGTCATATACATGAGCCGGTGCTTTGCTC
rs7887673	X	153824899	rs7887673	G6PD	1	G	A	W1175	GOOD	W1187	DID NOT MULTIPLEX		dbSNP		CAGAGCTTAGTGTTGAGGCTGTGGGTGCAGCTGTGGCTTCCTCATCCCCTCCAGGCAGGGGTGGAGCACCATGGTGAGGGGAGGGGGGCCAGAGTTCACC[A/G]TAGAAACCAGAAGTGCTAGTTAAGAAGCCAGAGGAATTCTGAGCCTCCCCCCTCACCGCCTTCCCCTGCAACCAGAATTGCATTCCTGCATATTTAGCAC
rs6655250	X	153825726	rs6655250	G6PD	1	G	A	W1176	GOOD	W1188	DID NOT MULTIPLEX		dbSNP		GGGCAGTTCCCCTGCACACGCTGTCTTGCCTGCCGCCATGTAAGACATGCCTTTGCTCATCCTTCGCCTTCCGCCATGATTGTGAGGCCTCCCCAGCCAC[A/G]TGGAACTGTGAGTCCATTGAACCTCTCTTTCTTTATAAACTACCCAGTGTTGGGTATTTCTTCATAGTGAAACAGCCAAGTAGAAAGGGGCCCTGGAGAA
rs35622624	X	153826630	rs35622624	G6PD	1	G	C	W1176	FAIL				dbSNP		AGAAAAGACAGTTTGAGAGAGAAAGTGAGTTCAGGGGGCCATCGCTAAGTATGGAGGCTGTGAAGGCCCCGAGCTCTGGAAGCCCAGACTATTTATTGGT[C/G]ATCAAAGAAACAGGTGGTGAGAATGTGGGGTTGAAAGGGCGCATTGCATTAAGCACAAGATTTACAGCTGTGATGGTTTAGSATATGCTCYGCTACTTGA
rs28458996	X	153826712	rs28458996	G6PD	1	C	G	W1176	FAIL				dbSNP		CCCAGACTATTTATTGGTSATCAAAGAAACAGGTGGTGAGAATGTGGGGTTGAAAGGGCGCATTGCATTAAGCACAAGATTTACAGCTGTGATGGTTTAG[C/G]ATATGCTCYGCTACTTGAGATAATGGAGARCAGGTTCTTTTAACTCAAGATACAATCAATCCTGGGAGAGCAAGGAGCAAGGAGCCAGCAAGTCTAGACA
rs28579420	X	153826721	rs28579420	G6PD	1	T	C	W1175	GOOD	W1187	DID NOT MULTIPLEX		dbSNP		TTTATTGGTSATCAAAGAAACAGGTGGTGAGAATGTGGGGTTGAAAGGGCGCATTGCATTAAGCACAAGATTTACAGCTGTGATGGTTTAGSATATGCTC[C/T]GCTACTTGAGATAATGGAGARCAGGTTCTTTTAACTCAAGATACAATCAATCCTGGGAGAGCAAGGAGCAAGGAGCCAGCAAGTCTAGACACATTCCAGA
rs28534384	X	153826922	rs28534384	G6PD	1	G	C	W1174	GOOD	W1186	DID NOT MULTIPLEX		dbSNP		GCCACGAGCCCTGGATTCTATCCAAGCCACGAGGGGTTTTATGCCCTGGGCTGAGATTATGGTGCATCAGGGTAGCCTTCYACCCTTTASCACAGAGCTT[C/G]GTGTTCCAAAGGCCACGAGGGGTTTTAGACCCTGGACCCCGGACATGTTCCAAGACTTTTACATTATGTCAGACATGCAAGCCCTGCCTCAGCTTGTCTC
rs5986997	X	153827549	rs5986997	G6PD	1	C	T	W1177	GOOD	W1189	RE-PLEXED	W1198	dbSNP		CCTCGGCAGTTGGGTTATTTAAATGCCAACTCACTGTGAGTTTCCCCTTTAAAGAGTTCATAGGATGCACAGGAATATCTAGCCCCGGCCCTATAGCCAC[C/T]AAATGTAGAAGACAAGCCAGTGTCCCATCCCAGTAGAATTATGTTCCCAGAACTCAGTCCCACGTTGCCCCAGACCCTATCAGAATCRGTGATCTCTAAT
rs4898389	X	153827637	rs4898389	AF277315.19	1	G	A	W1175	GOOD	W1187	RE-PLEXED	W1198	dbSNP		CCCTATAGCCACYAAATGTAGAAGACAAGCCAGTGTCCCATCCCAGTAGAATTATGTTCCCAGAACTCAGTCCCACGTTGCCCCAGACCCTATCAGAATC[A/G]GTGATCTCTAATTGGTATCTAAGTTGAGGGAGGTGTAGAAAGTCTGGGTAATTTTGAGAGCTGTGGTACCTGAGCTATCGCTGCTTTAGGATGTCTAGAA
rs5986877	X	153828269	rs5986877	AF277315.19	1	G	C	W1176	GOOD	W1188	RE-PLEXED	W1198	dbSNP		CCCAAAGCCTGTTCCCTGGGTGCTGAGAACAATAGGGTTTCCAYGGCCTGTGCCTCCATTATAAGCAGAAGAGCTCTGCTTTAGCAACTGTGGCTGACGT[C/G]AGATGGGTGCCTGAGAGGAGGAAGGGGGAAGAGCAAGGTGGAGGGGCTGGAAAGGCACCACCGTGCGGTGTTGGGAGCCCCTCTGGGGGTGGAGGCAGAG
rs7879049	X	153829693	rs7879049	AF277315.19	1	A	G	W1176	GOOD	W1188	RE-PLEXED	W1198	dbSNP		TCTCCTAGACGGGGCTGCTCTCTGGATTTCTGCCCCTCCCAGGTCACCCCAGGCCTCCTCTCCAGGGGTGCTCAGGGGAGTGAGAAAAGCCGGGCATGCC[A/G]TGCTCTATGCCAGGATGTGCTCTGTGCCATGGGCTGTGGTAAAAAAGAAATGCCAGAAGCCACTTCAACAGCAAAGTACTCAAAGACTGATGAAATTATG
rs7053878	X	153834100	rs7053878	AF277315.19	1	T	A	W1177	GOOD	W1189	RE-PLEXED	W1198	dbSNP		GAAAATCACCTGAGCCTGGGGAGGTGGAGGCTGCAGTGGGCCTTGACTGTGCCACTGCACTCCAGCCTGAGCAACAGAGGAGATGCTGTCTCAAAAAAAA[A/T]TTTTTTTAAATAAGGGGATGAAGATGTCCCTCTTATGGAGCAGACCGTGTCTCAGGTACTGCAGTCAGCCAAAGAACAGATCAAGTGGTCACTCCTTCAG
rs60030796	X	153836171	rs60030796	AF277315.19	1	A	G	W1177	GOOD	W1189	RE-PLEXED	W1197	dbSNP		TAAAGACAAAGAAAGATGTGGTGCACTTCCTGGTGCAATGTAATGGGAAAGCACAGTCCCACCTGGAGAGTGGTCTTGGCCAAAAAGAAAAATGTTTTCT[A/G]TTTCTCGAATTCATTATATTTTCCTAGCACAATGTCCAGTTAATCGTTTTTTAAATTTACTACAGTGAATTTATCTTATTGTTTTTCAAATCTCTGCTAT
rs12396972	X	153836330	rs12396972	AF277315.19	1	T	G	W1176	FAIL				dbSNP		ACTACAGTGAATTTATCTTATTGTTTTTCAAATCTCTGCTATACCTATAGTTATATATAATCTTTCCAGACTTCTTTTTTTTTTTTTTTTTTTTTTGAGG[G/T]GGAGATCAAAAAAGGATCCAGAGGAGAAGGAAGCCGCTCACACCCTCCGGGGCAGGCATGCGGAGGTGGCAYTCACCTGGCTTCCTGCTGGGACTTCCTC
rs7064892	X	153837904	rs7064892	AF277315.19	1	G	A	W1174	FAIL				dbSNP		TTTACAATAGTGGAACTTCTGATAGTTTTAACCCAAGTGACGGCATTAAGATTTGTGAGGCCATCAGCAGCTTTCACGATTGCCTCAGTTTCTGGCACCA[A/G]ATTTAAATGGGCTTTTGATGCCTCAAAAATTTGTTCTTTTAATTTTGAAATATCTAAAGTAAGATTATCTTCTCTTCCTTGTAGATGGCATCTAACCATG
rs2004651	X	153839815	rs2004651	AF277315.19	1	T	G	W1177	GOOD	W1189	DID NOT MULTIPLEX		dbSNP		ATTTCCGATGGGTTCATTGTAGAACTTTAAATGTCTAGTGGGTATCCAAACAGGAAGCTGACTTTTTTCCTGGTGAAACGCAAGCAAAGCCTTTCCCCCA[G/T]GTTATCACCTTCCCTATTTCCCATGTCTTATTTTTGATGTCTTTCCACCAAATCAGTTTTCCTTCATGTGGGCTGTTCTTTTTACCAGTAAAATGTTGTT
rs35228794	X	153841005		AF277315.19	1	A	G	W1176	GOOD	W1188	DID NOT MULTIPLEX		dbSNP		CAGAGCATTTTCTAAAGGTGTATGTCTGGTAATTTTAGGTAAAATCCAAGTAGTCAATTTTAAAAACTGGAAGGTTTTTGTTTTTGGGTAATGATTGTCA[A/G]TAATTCCCACAAAATCAGCAAGACCAATCTGCAATGCACCAGAATTGATAAAGGCTTGTGTAACCTGTTCCTTGTTTAAAGGAACAATGATTTTATCTGG

## Sheet: Supplementary file 2B
SNP_NAME	WELL	TERM	ASSAY_VERSION	2nd-PCRP	1st-PCRP	amp_len	up_conf	mp_conf	TM(NN)	PcGC	pwarn	uep_dir	uep_mass	UEP_SEQ	ext1_call	ext1_mass	ext1_seq	ext2_call	ext2_mass	ext2_seq	ext3_call	ext3_mass	ext3_seq	ext4_call	ext4_mass	ext4_seq	first_pause
rs2230037	W1174	iPLEX	rs2230037	ACGTTGGATGCATCAGCAAGACACTCTCTC	ACGTTGGATGCAGAAGACGTCCAGGATGAG	98	98.5	64.1	51	66.7		R	4488.9	GCTCCCTGACGCCTA	G	4736.1	GCTCCCTGACGCCTAC	A	4816	GCTCCCTGACGCCTAT
hG6PD_968	W1174	iPLEX	hG6PD_968_A	ACGTTGGATGTGGGGAACCCCGATGGAGA	ACGTTGGATGACGACGGCTGCAAAAGTGG	117	80.1	64.1	46	60	Dg	F	4531	CCACCAAAGGGTACC	C	4778.2	CCACCAAAGGGTACCC	T	4858.1	CCACCAAAGGGTACCT
G6PD_X_b36_153416679	W1174	iPLEX	G6PD_X_b36_153416679	ACGTTGGATGAGGTAGAAGAGGCGGTTGG	ACGTTGGATGATGATGCAGCCTCCTACCAG	102	94.6	64.1	51	66.7	D	F	4609	TGTGACCCCAGGTGG	A	4880.2	TGTGACCCCAGGTGGA	G	4896.2	TGTGACCCCAGGTGGG
hG6PD_542	W1174	iPLEX	hG6PD_542_A	ACGTTGGATGAGATCTGGTCCTCACGGAAC	ACGTTGGATGATCATCGTGGAGAAGCCCTT	111	95.6	64.1	52	66.7	D	R	4649	TGGTTGGACAGCCGG	T	4920.2	TGGTTGGACAGCCGGA	A	4976.1	TGGTTGGACAGCCGGT
G6PD_X_b36_153415014	W1174	iPLEX	G6PD_X_b36_153415014	ACGTTGGATGAGAACCACCTACTGCAGATG	ACGTTGGATGTTCTCATCACGGACGTCATC	102	100	64.1	52	73.3	D	R	4836.2	aGAGAAGCCCGCCTCC	T	5107.4	aGAGAAGCCCGCCTCCA	A	5163.3	aGAGAAGCCCGCCTCCT
rs2515904	W1174	iPLEX	rs2515904	ACGTTGGATGAGCTGCGTTACCCCCTTGA	ACGTTGGATGTGGGAGGGCGTCTGAATGAT	91	89.6	64.1	50	62.5	Dg	F	5011.3	CGGGGAGTGAGGATCA	C	5258.5	CGGGGAGTGAGGATCAC	G	5298.5	CGGGGAGTGAGGATCAG
hG6PD_680	W1174	iPLEX	hG6PD_680_A	ACGTTGGATGTTTGCCAACAGGATCTTCGG	ACGTTGGATGCCTTGAAGGTGAGGATAACG	90	99.6	64.1	49	66.7	D	F	5076.3	ccGCCCCATCTGGAACC	G	5363.5	ccGCCCCATCTGGAACCG	T	5403.4	ccGCCCCATCTGGAACCT
G6PD_X_b36_153413799	W1174	iPLEX	G6PD_X_b36_153413799	ACGTTGGATGTCATCCTGGACGTCTTCTGC	ACGTTGGATGATAGCCCACAGGTATGCAGG	106	97	64.1	51	58.8	d	R	5186.4	GCCAGATGCACTTCGTG	G	5433.6	GCCAGATGCACTTCGTGC	A	5513.5	GCCAGATGCACTTCGTGT
G6PD_X_b36_153427466	W1174	iPLEX	G6PD_X_b36_153427466	ACGTTGGATGCCTGGCTTTTAAGATTGGG	ACGTTGGATGGCCTTCCATCAGTCGGATAC	104	96.4	64.1	47	47.1	D	F	5203.4	GCACCCATGATGATGAA	C	5450.6	GCACCCATGATGATGAAC	T	5530.5	GCACCCATGATGATGAAT
rs5986990	W1174	iPLEX	rs5986990	ACGTTGGATGAAGTCACCACCTCTGAGCAC	ACGTTGGATGCTGGGACATGACAACTTGGG	102	97.1	64.1	54	58.8	d	R	5226.4	TGACCTGGACTGGCAGT	G	5473.6	TGACCTGGACTGGCAGTC	A	5553.5	TGACCTGGACTGGCAGTT
rs2230036	W1174	iPLEX	rs2230036	ACGTTGGATGAAGGCCCTGAACGAGCGCAA	ACGTTGGATGTGCACTGCTGGTGGAAGATG	99	90.6	64.1	52	66.7	Ds	R	5316.5	ggCGAGGTGAGGCTGCA	T	5587.7	ggCGAGGTGAGGCTGCAA	C	5603.7	ggCGAGGTGAGGCTGCAG
G6PD_X_b36_153413666	W1174	iPLEX	G6PD_X_b36_153413666	ACGTTGGATGTCAATCTGGTGCAGCAGTGG	ACGTTGGATGACCGGCCTCCCAAGCCATA	107	86.9	64.1	47	47.1	g	F	5323.5	GCAGTGGGGTGAAAATA	C	5570.7	GCAGTGGGGTGAAAATAC	T	5650.6	GCAGTGGGGTGAAAATAT
rs2515905	W1174	iPLEX	rs2515905	ACGTTGGATGAGTGTCTGAGCTATCAGACC	ACGTTGGATGGGTGATGCTATCACTGAATC	110	98.2	64.1	54	61.1	D	R	5382.5	CCCTACACAGCCAAGCAC	G	5629.7	CCCTACACAGCCAAGCACC	A	5709.6	CCCTACACAGCCAAGCACT
rs7064892	W1174	iPLEX	rs7064892	ACGTTGGATGATTTGTGAGGCCATCAGCAG	ACGTTGGATGTTTTGAGGCATCAAAAGCCC	99	98.6	64.1	46	53.3	D	F	5684.7	ccccCAGTTTCTGGCACCA	A	5955.9	ccccCAGTTTCTGGCACCAA	G	5971.9	ccccCAGTTTCTGGCACCAG
G6PD_X_b36_153412566	W1174	iPLEX	G6PD_X_b36_153412566	ACGTTGGATGATTGTGAGACCAGCTTGAGG	ACGTTGGATGTTGCTGGAAGTCATCTTGGG	111	99.5	64.1	49	66.7	Dg	R	5731.7	ctccGTGGGGTCACCTTCC	T	6002.9	ctccGTGGGGTCACCTTCCA	C	6018.9	ctccGTGGGGTCACCTTCCG
G6PD_X_b36_153414531	W1174	iPLEX	G6PD_X_b36_153414531	ACGTTGGATGCATTCTCTCCCTTGGCTTTC	ACGTTGGATGAGGACCACATTGTTGGCCTG	96	98.5	64.1	48	50	D	R	5769.8	tGCTTTCTCTCAGGTCAAG	T	6041	tGCTTTCTCTCAGGTCAAGA	C	6057	tGCTTTCTCTCAGGTCAAGG
rs762515	W1174	iPLEX	rs762515	ACGTTGGATGTGGCACAGGCTTGAATCTCG	ACGTTGGATGCTACTCAGGATCACTACTGG	105	98.5	64.1	48	56.3	D	R	5816.8	gatGGGCTCTTCTGTCTGT	T	6088	gatGGGCTCTTCTGTCTGTA	C	6104	gatGGGCTCTTCTGTCTGTG
G6PD_X_b36_153414758	W1174	iPLEX	G6PD_X_b36_153414758	ACGTTGGATGGACAGTCACTATGTGACCAG	ACGTTGGATGGGTCCATCTCGAGTCTATTC	99	100	64.1	51	62.5	D	R	5918.8	gggCAGGGAAGGCCATTGC	G	6166	gggCAGGGAAGGCCATTGCC	A	6245.9	gggCAGGGAAGGCCATTGCT
G6PD_X_b36_153417405	W1174	iPLEX	G6PD_X_b36_153417405	ACGTTGGATGTCACTCTGTTTGCGGATGTC	ACGTTGGATGATGGCCTTCTGCCCGAAAAC	102	98.5	64.1	56	73.3	d	F	5934.8	gtgcGGCGGGAACGGGCAT	A	6206.1	gtgcGGCGGGAACGGGCATA	G	6222.1	gtgcGGCGGGAACGGGCATG
rs12389568	W1174	iPLEX	rs12389568	ACGTTGGATGGTGAGTCACCCTATGGAATG	ACGTTGGATGTTGGAGCTCACAGGAGCACT	96	96	64.1	48	60	Ds	F	6127	ccaagGGATCTGGGCTCACA	A	6398.2	ccaagGGATCTGGGCTCACAA	G	6414.2	ccaagGGATCTGGGCTCACAG
G6PD_X_b36_153428979	W1174	iPLEX	G6PD_X_b36_153428979	ACGTTGGATGTCAGACTTCTCTCCGGAGC	ACGTTGGATGAAGTAAAAACACAAGCCCCG	116	89.5	64.1	49	66.7	D	F	6134	ggagaCGGCTTCCCGAGTTC	C	6381.2	ggagaCGGCTTCCCGAGTTCC	T	6461.1	ggagaCGGCTTCCCGAGTTCT
rs12393550	W1174	iPLEX	rs12393550	ACGTTGGATGAAAGTGGCCAGGGAGGAGTG	ACGTTGGATGTTCTACGACATCGGGCCCTG	109	88.8	64.1	58	66.7	Ds	R	6185	aaCCGCAGCACAGGTGAGGA	G	6432.2	aaCCGCAGCACAGGTGAGGAC	A	6512.1	aaCCGCAGCACAGGTGAGGAT
G6PD_X_b36_153426354	W1174	iPLEX	G6PD_X_b36_153426354	ACGTTGGATGCCTGGATGCACTCAAGAATC	ACGTTGGATGACTAGTTTTGATAGAGCTCC	118	93.1	64.1	47	38.1	d	R	6300.1	CCATTAACTTACCTTGTAACC	C	6587.3	CCATTAACTTACCTTGTAACCG	A	6627.2	CCATTAACTTACCTTGTAACCT
rs2515906	W1174	iPLEX	rs2515906	ACGTTGGATGTGGCTCAAGCGTGTAATCTC	ACGTTGGATGAGGCTGGTCTTGAACTTCTG	99	100	64.1	47	44.4	d	R	6317.1	cccCGTGTAATCTCAGCACTT	G	6564.3	cccCGTGTAATCTCAGCACTTC	A	6644.2	cccCGTGTAATCTCAGCACTTT
G6PD_X_b36_153424232	W1174	iPLEX	G6PD_X_b36_153424232	ACGTTGGATGTTCAGGCTGACGTGTGTTTC	ACGTTGGATGCTCTTTGTGGGATCTATGCG	100	100	64.1	49	42.9	d	R	6485.2	GACGTGTGTTTCAGAAGATAC	T	6756.4	GACGTGTGTTTCAGAAGATACA	C	6772.4	GACGTGTGTTTCAGAAGATACG
G6PD_X_b36_153413991	W1174	iPLEX	G6PD_X_b36_153413991	ACGTTGGATGAGATGATGACCAAGAAGCCG	ACGTTGGATGTCTGTAGGGCACCTTGTATC	112	99.4	64.1	50	58.8	d	R	6487.2	gggtGAGCTGGACCTGACCTA	G	6734.4	gggtGAGCTGGACCTGACCTAC	A	6814.3	gggtGAGCTGGACCTGACCTAT
G6PD_X_b36_153430003	W1174	iPLEX	G6PD_X_b36_153430003	ACGTTGGATGGGTTTGTTTGTTTTTGAGAG	ACGTTGGATGAGAGTGAGCTGAGATCATGC	98	87.6	64.1	48	40	d	F	6547.3	gGTTTTTGAGAGATGGAGTCT	C	6794.4	gGTTTTTGAGAGATGGAGTCTC	T	6874.4	gGTTTTTGAGAGATGGAGTCTT
G6PD_X_b36_153426720	W1174	iPLEX	G6PD_X_b36_153426720	ACGTTGGATGCTCTGCCTCTTCACTAACAC	ACGTTGGATGCGAAATTGAGGCAAAGAGAC	104	98.5	64.1	47	31.8	d	R	6668.4	GATACAAACACTTAGCTTTTCT	G	6915.6	GATACAAACACTTAGCTTTTCTC	A	6995.5	GATACAAACACTTAGCTTTTCTT
G6PD_X_b36_153429686	W1174	iPLEX	G6PD_X_b36_153429686	ACGTTGGATGTGCGTAAAAGCCAATCTCCC	ACGTTGGATGAGCACAGTTGGAGAGGAAGG	101	98.6	64.1	55	63.2	D	R	6689.4	caaGGCCTACAAGGCCCTGTAC	G	6936.5	caaGGCCTACAAGGCCCTGTACC	T	6960.6	caaGGCCTACAAGGCCCTGTACA
G6PD_X_b36_153422839	W1174	iPLEX	G6PD_X_b36_153422839	ACGTTGGATGTGAGGTAAGACGGACAGTAG	ACGTTGGATGTCAGCTTAGCTCCCTGTCAC	92	98.3	64.1	61	72.2	Dg	F	6857.4	tggcGGGGTAAGGCAGGCCGCT	C	7104.6	tggcGGGGTAAGGCAGGCCGCTC	A	7128.6	tggcGGGGTAAGGCAGGCCGCTA
rs28534384	W1174	iPLEX	rs28534384	ACGTTGGATGAAAGTCTTGGAACATGTCCG	ACGTTGGATGGTGCATCAGGGTAGCCTTC	119	93.2	64.1	53	55.6	Ds	R	6976.5	ccccgTCGTGGCCTTTGGAACAC	G	7223.7	ccccgTCGTGGCCTTTGGAACACC	C	7263.7	ccccgTCGTGGCCTTTGGAACACG
G6PD_X_b36_153426256	W1174	iPLEX	G6PD_X_b36_153426256	ACGTTGGATGCTGAGCTCAGTGGTTCTTTG	ACGTTGGATGCAAAGGTGTCAAGGAGTAGG	96	99.9	64.1	50	38.1	D	R	7031.6	gaTTTGTTCACATAGAACAACGC	T	7302.8	gaTTTGTTCACATAGAACAACGCA	C	7318.8	gaTTTGTTCACATAGAACAACGCG
rs5986992	W1174	iPLEX	rs5986992	ACGTTGGATGAGGGAGGAGTAGAAACAGTC	ACGTTGGATGTTCTGGAGCACTGGCCAAG	100	96	64.1	50	52.6	d	R	7048.6	gaacGTAACCTGGGTCCTGAATC	C	7335.8	gaacGTAACCTGGGTCCTGAATCG	A	7375.7	gaacGTAACCTGGGTCCTGAATCT
rs28613671	W1174	iPLEX	rs28613671	ACGTTGGATGGATTATAGGCTTGAGCCACC	ACGTTGGATGCAAGAGTGAAACTCCGTCTC	100	100	64.1	46	28.6	d	R	7072.6	ggCAGCTGTTTAGTTGTTTTTTT	C	7359.8	ggCAGCTGTTTAGTTGTTTTTTTG	A	7399.7	ggCAGCTGTTTAGTTGTTTTTTTT
rs762517	W1174	iPLEX	rs762517	ACGTTGGATGACGTGACCTCAAGTGCTTAC	ACGTTGGATGCTGGCCCTTTTTCTCACTTC	110	99.6	64.1	46	26.1	d	F	7161.7	AAAAAGAGTGGTTCAAAAATAAG	A	7432.9	AAAAAGAGTGGTTCAAAAATAAGA	G	7448.9	AAAAAGAGTGGTTCAAAAATAAGG
G6PD_X_b36_153424319	W1175	iPLEX	G6PD_X_b36_153424319	ACGTTGGATGACAGCGATTGGGTACTTCTG	ACGTTGGATGTTACTTGCCGTGGTTCCCTG	113	97.9	63.4	52	66.7	Ds	R	4399.9	TCCCTGCCCTCCTCA	G	4647	TCCCTGCCCTCCTCAC	A	4727	TCCCTGCCCTCCTCAT
rs2071429	W1175	iPLEX	rs2071429	ACGTTGGATGTTTGCCCTCCCTCCCTGTGT	ACGTTGGATGGCAGCAGTGGGGTGAAAATA	120	88.2	63.4	46	60	g	R	4441.9	CCTCCCAAGCCATAC	G	4689.1	CCTCCCAAGCCATACC	A	4769	CCTCCCAAGCCATACT
rs6643678	W1175	iPLEX	rs6643678	ACGTTGGATGTTGTGGCTGAATTCTTTGGC	ACGTTGGATGAAGGCTGGAGCCCTGTTTTC	80	95.6	63.4	50	53.3	D	F	4608	TTGGCATTGCAGGCA	A	4879.2	TTGGCATTGCAGGCAA	G	4895.2	TTGGCATTGCAGGCAG
G6PD_X_b36_153415799	W1175	iPLEX	G6PD_X_b36_153415799	ACGTTGGATGATCTCCTTGCCCAGGTAGTG	ACGTTGGATGCGGCTGTCCAACCACATCT	97	92.1	63.4	46	60	D	F	4664	GGTAGTGGTCGATGC	A	4935.2	GGTAGTGGTCGATGCA	G	4951.2	GGTAGTGGTCGATGCG
G6PD_X_b36_153417417	W1175	iPLEX	G6PD_X_b36_153417417	ACGTTGGATGTGTTCCGGGATGGCCTTCTG	ACGTTGGATGTCACTCTGTTTGCGGATGTC	111	93.9	63.4	50	56.3	d	R	4795.1	TCTGCCCGAAAACACC	T	5066.4	TCTGCCCGAAAACACCA	A	5122.2	TCTGCCCGAAAACACCT
G6PD_X_b36_153414378	W1175	iPLEX	G6PD_X_b36_153414378	ACGTTGGATGTGCCCCGCGGGTCCACCAC	ACGTTGGATGTCGAAGGCATCACCTACCAT	106	61.4	63.4	51	56.3	d	R	4839.1	TTTTGCAGCCGTCGTC	G	5086.3	TTTTGCAGCCGTCGTCC	A	5166.2	TTTTGCAGCCGTCGTCT
G6PD_X_b36_153413623	W1175	iPLEX	G6PD_X_b36_153413623	ACGTTGGATGTTTTCACCCCACTGCTGCAC	ACGTTGGATGCACCTGCCATAAATATAGGG	90	96.8	63.4	48	60	DS	R	4971.2	gTGAGCTGGAGAAGCC	G	5218.4	gTGAGCTGGAGAAGCCC	A	5298.3	gTGAGCTGGAGAAGCCT
G6PD_X_b36_153416656	W1175	iPLEX	G6PD_X_b36_153416656	ACGTTGGATGTTGGTGACGGCCTCGTAGAC	ACGTTGGATGAGCGCCTCAACAGCCACAT	120	86.9	63.4	49	62.5	D	F	4980.3	GCCAGGTAGAAGAGGC	A	5251.5	GCCAGGTAGAAGAGGCA	G	5267.5	GCCAGGTAGAAGAGGCG
G6PD_X_b36_153426966	W1175	iPLEX	G6PD_X_b36_153426966	ACGTTGGATGCAAAGTGCTGGGATGACAGG	ACGTTGGATGTTAAGGGCTACATTCAGCGG	109	98.2	63.4	53	66.7	Ds	R	5140.4	gtATGAGCCACCACGCC	G	5387.5	gtATGAGCCACCACGCCC	C	5427.6	gtATGAGCCACCACGCCG
rs7887673	W1175	iPLEX	rs7887673	ACGTTGGATGTGTGGCTTCCTCATCCCCTC	ACGTTGGATGGGCTTCTTAACTAGCACTTC	119	91.7	63.4	52	68.8	dg	F	5196.4	cGGGGCCAGAGTTCACC	A	5467.6	cGGGGCCAGAGTTCACCA	G	5483.6	cGGGGCCAGAGTTCACCG
G6PD_X_b36_153411172	W1175	iPLEX	G6PD_X_b36_153411172	ACGTTGGATGTCCTGCCTCCACCCAAGTAG	ACGTTGGATGAGGTGGAAGACCATCCACTG	103	93	63.4	47	56.3	D	F	5315.5	gGCTGAAGGGACAGTTG	C	5562.6	gGCTGAAGGGACAGTTGC	G	5602.7	gGCTGAAGGGACAGTTGG
G6PD_X_b36_153429371	W1175	iPLEX	G6PD_X_b36_153429371	ACGTTGGATGGAGCTGGACTGTTTCTACTC	ACGTTGGATGAACTAGAGGAGTCCTCACAC	99	100	63.4	52	73.3	D	F	5332.5	cccCCTCCTCCACTGCGG	G	5619.7	cccCCTCCTCCACTGCGGG	T	5659.6	cccCCTCCTCCACTGCGGT
G6PD_X_b36_153413455	W1175	iPLEX	G6PD_X_b36_153413455	ACGTTGGATGAGGCAGACGAGCTGATGAAG	ACGTTGGATGGTTCACCCACTTGTAGGTGC	82	95.9	63.4	46	47.1	d	R	5354.5	GATGAAGAGAGTGGGTT	C	5641.7	GATGAAGAGAGTGGGTTG	A	5681.6	GATGAAGAGAGTGGGTTT
G6PD_X_b36_153415904	W1175	iPLEX	G6PD_X_b36_153415904	ACGTTGGATGTGATCCTCACTCCCCGAAGA	ACGTTGGATGAGGGCTTCTCCACGATGATG	111	94.2	63.4	60	72.2		R	5445.5	CTCCGGGCTCCCAGCAGA	T	5716.7	CTCCGGGCTCCCAGCAGAA	C	5732.7	CTCCGGGCTCCCAGCAGAG
G6PD_X_b36_153411809	W1175	iPLEX	G6PD_X_b36_153411809	ACGTTGGATGAGGTAGCAGGGCCCGATGT	ACGTTGGATGAATTGAACACCGGGATGCAG	109	88	63.4	52	58.8	D	R	5524.6	cGGCCCGATGTCGTAGAA	G	5771.8	cGGCCCGATGTCGTAGAAC	A	5851.7	cGGCCCGATGTCGTAGAAT
G6PD_X_b36_153424389	W1175	iPLEX	G6PD_X_b36_153424389	ACGTTGGATGAGAAGTACCCAATCGCTGTC	ACGTTGGATGGCACGTGATCCTAGAATCTG	99	100	63.4	47	47.1	D	F	5581.7	gGCTCAATGAACGGAGAA	C	5828.8	gGCTCAATGAACGGAGAAC	T	5908.8	gGCTCAATGAACGGAGAAT
rs2472393	W1175	iPLEX	rs2472393	ACGTTGGATGAGCACCTGGAACAGCTCCG	ACGTTGGATGTAGGATCACGTGCCCTCAAG	119	88	63.4	54	73.3	D	R	5750.7	gggcACAGCTCCGGCTCCC	T	6021.9	gggcACAGCTCCGGCTCCCA	C	6037.9	gggcACAGCTCCGGCTCCCG
rs61079577	W1175	iPLEX	rs61079577	ACGTTGGATGAACTCCCCTTCATGAAACCG	ACGTTGGATGGGAGGTAACTGAATCATGGG	115	99.1	63.4	46	47.1	Ds	R	5750.8	ccCTATCACGAGAACAGCA	G	5998	ccCTATCACGAGAACAGCAC	A	6077.9	ccCTATCACGAGAACAGCAT
G6PD_X_b36_153412691	W1175	iPLEX	G6PD_X_b36_153412691	ACGTTGGATGACACCAAACATGGTCATGGC	ACGTTGGATGTGCTTCCTCTGTGGCCACTG	97	94.3	63.4	52	55.6	Dsg	F	5877.8	cCTGGACATGGGGTCAGAA	C	6125	cCTGGACATGGGGTCAGAAC	T	6204.9	cCTGGACATGGGGTCAGAAT
G6PD_X_b36_153423752	W1175	iPLEX	G6PD_X_b36_153423752	ACGTTGGATGAACTAAGGCCCAGAGAAGTG	ACGTTGGATGATGATGCTGGAGAGCTTCAC	105	99.9	63.4	48	50	d	F	5938.9	tcTCAATCCCAGTCTCTTCC	C	6186.1	tcTCAATCCCAGTCTCTTCCC	T	6266	tcTCAATCCCAGTCTCTTCCT
G6PD_X_b36_153427470	W1175	iPLEX	G6PD_X_b36_153427470	ACGTTGGATGGCGATGCCTTCCATCAGTC	ACGTTGGATGCTGGGAGATACTCACCGATG	88	94	63.4	49	47.4	D	R	6061	aTTCCATCAGTCGGATACAC	T	6332.2	aTTCCATCAGTCGGATACACA	C	6348.2	aTTCCATCAGTCGGATACACG
G6PD_X_b36_153417577	W1175	iPLEX	G6PD_X_b36_153417577	ACGTTGGATGTGGGACACACTTACCAGATG	ACGTTGGATGTCTAACCACACACCTGTTCC	103	100	63.4	49	45	Dg	F	6145	TGGGGTAGATCTTCTTCTTG	C	6392.2	TGGGGTAGATCTTCTTCTTGC	G	6432.2	TGGGGTAGATCTTCTTCTTGG
G6PD_X_b36_153426402	W1175	iPLEX	G6PD_X_b36_153426402	ACGTTGGATGTGGCAAAGATGGTCATACAG	ACGTTGGATGTACACGTGGTCTCAGTTTTC	102	97.1	63.4	49	40	D	F	6165	TGGTCATACAGTAATGAGCA	C	6412.2	TGGTCATACAGTAATGAGCAC	G	6452.2	TGGTCATACAGTAATGAGCAG
rs2515909	W1175	iPLEX	rs2515909	ACGTTGGATGTCACACCATTGCACTCCAGC	ACGTTGGATGCTGTATTGCTGGCTTTGGAG	113	97.9	63.4	48	56.3	d	R	6231.1	gtgtGCAACGGAGTGAAACG	G	6478.2	gtgtGCAACGGAGTGAAACGC	C	6518.3	gtgtGCAACGGAGTGAAACGG
rs56368797	W1175	iPLEX	rs56368797	ACGTTGGATGTGAGCTAGCTTTCACCACTG	ACGTTGGATGATCTCCAGATGCAGTACCTC	116	99	63.4	49	47.4	D	F	6310.1	ctCTTTCACCACTGAGACAAC	A	6581.3	ctCTTTCACCACTGAGACAACA	G	6597.3	ctCTTTCACCACTGAGACAACG
G6PD_X_b36_153426313	W1175	iPLEX	G6PD_X_b36_153426313	ACGTTGGATGAGCAGGAGCTCTATCAAAAC	ACGTTGGATGTGAACAAAGAACCACTGAGC	102	97.1	63.4	46	35	D	R	6371.2	gACTAGTTAGTTCTTCCACAT	G	6618.3	gACTAGTTAGTTCTTCCACATC	A	6698.3	gACTAGTTAGTTCTTCCACATT
rs60589782	W1175	iPLEX	rs60589782	ACGTTGGATGCCACGCCCAGCTAATTTTTG	ACGTTGGATGGTCAAGAGATCAAGACCATC	98	98.5	63.4	46	47.1	dg	F	6502.2	gcgcGAGATGGGGTTTCATCA	C	6749.4	gcgcGAGATGGGGTTTCATCAC	T	6829.3	gcgcGAGATGGGGTTTCATCAT
rs12116261	W1175	iPLEX	rs12116261	ACGTTGGATGGCCAATCAGATGGAAAAAA	ACGTTGGATGAAATGCTGGGATTACAGGCG	118	84.6	63.4	46	35	Ds	R	6545.3	gTAAAAACTAAAGAAGGAGGC	G	6792.5	gTAAAAACTAAAGAAGGAGGCC	A	6872.4	gTAAAAACTAAAGAAGGAGGCT
rs28579420	W1175	iPLEX	rs28579420	ACGTTGGATGTGCTCTCCCAGGATTGATTG	ACGTTGGATGTTACAGCTGTGATGGTTTAG	113	93.7	63.4	47	40	d	R	6644.3	taTCTCCATTATCTCAAGTAGC	T	6915.6	taTCTCCATTATCTCAAGTAGCA	C	6931.6	taTCTCCATTATCTCAAGTAGCG
G6PD_X_b36_153412620	W1175	iPLEX	G6PD_X_b36_153412620	ACGTTGGATGCTCAAGCTGGTCTCACAATG	ACGTTGGATGGACCATGTTTGGTGTCAGAG	97	100	63.4	49	40.9	D	F	6718.4	CTGGTCTCACAATGACAATATG	C	6965.6	CTGGTCTCACAATGACAATATGC	A	6989.6	CTGGTCTCACAATGACAATATGA
rs4323635	W1175	iPLEX	rs4323635	ACGTTGGATGCCTTACGTTTTTTAACAGTAG	ACGTTGGATGGATTTCCAGGAGTTCGAGTC	91	83.4	63.4	47	36.4	D	F	6813.5	GTTTTTTAACAGTAGAGACAGG	G	7100.7	GTTTTTTAACAGTAGAGACAGGG	T	7140.6	GTTTTTTAACAGTAGAGACAGGT
rs12861291	W1175	iPLEX	rs12861291	ACGTTGGATGTTTCAGAACAGCCCCTTCTC	ACGTTGGATGCCAACATGAAGGATGGGAAC	111	99.5	63.4	47	50	D	R	6948.5	gtccgGGTTTCCTCCCTATCTTG	G	7195.7	gtccgGGTTTCCTCCCTATCTTGC	C	7235.7	gtccgGGTTTCCTCCCTATCTTGG
rs4898389	W1175	iPLEX	rs4898389	ACGTTGGATGCCTCCCTCAACTTAGATACC	ACGTTGGATGATGTTCCCAGAACTCAGTCC	101	100	63.4	46	34.8	D	R	7015.6	CTTAGATACCAATTAGAGATCAC	G	7262.8	CTTAGATACCAATTAGAGATCACC	A	7342.7	CTTAGATACCAATTAGAGATCACT
rs62617844	W1175	iPLEX	rs62617844	ACGTTGGATGGCTCTAAATAGAGTGATGTC	ACGTTGGATGCCCCGAGATAACTTTGCCAT	119	90.7	63.4	46	31.6		R	7035.6	gagcTGTCTTTTGTTTCCAAAGT	G	7282.8	gagcTGTCTTTTGTTTCCAAAGTC	A	7362.7	gagcTGTCTTTTGTTTCCAAAGTT
rs4256746	W1175	iPLEX	rs4256746	ACGTTGGATGAACTCGACATTTCTACTTGG	ACGTTGGATGTGGGTAGATCTGGGTTTTGG	110	94	63.4	46	38.1	d	R	7060.6	ggTCTACTTGGTTATCTAGTAGC	G	7307.8	ggTCTACTTGGTTATCTAGTAGCC	A	7387.7	ggTCTACTTGGTTATCTAGTAGCT
G6PD_X_b36_153415203	W1176	iPLEX	G6PD_X_b36_153415203	ACGTTGGATGCTAGTGACAAGCTGCAAGAC	ACGTTGGATGCATCACCATGTCCTTCCTTG	100	100	64.6	46	53.3	s	F	4429.9	TTCCTGATCCCCCTT	A	4701.1	TTCCTGATCCCCCTTA	G	4717.1	TTCCTGATCCCCCTTG
G6PD_X_b36_153413678	W1176	iPLEX	G6PD_X_b36_153413678	ACGTTGGATGACCGGCCTCCCAAGCCATA	ACGTTGGATGTCAATCTGGTGCAGCAGTGG	107	86.9	64.6	51	66.7	d	R	4538	TCAGCGACGAGCTCC	C	4825.2	TCAGCGACGAGCTCCG	A	4865.1	TCAGCGACGAGCTCCT
G6PD_X_b36_153413788	W1176	iPLEX	G6PD_X_b36_153413788	ACGTTGGATGATAGCCCACAGGTATGCAGG	ACGTTGGATGTCATCCTGGACGTCTTCTGC	106	97	64.6	60	86.7	Dsg	F	4675	GGGGCCGGCAGCTGG	A	4946.2	GGGGCCGGCAGCTGGA	G	4962.2	GGGGCCGGCAGCTGGG
G6PD_X_b36_153415828	W1176	iPLEX	G6PD_X_b36_153415828	ACGTTGGATGATCATCGTGGAGAAGCCCTT	ACGTTGGATGAGATCTGGTCCTCACGGAAC	111	95.6	64.6	46	50	d	R	4761.1	CTGTCCAACCACATCT	G	5008.3	CTGTCCAACCACATCTC	A	5088.2	CTGTCCAACCACATCTT
G6PD_X_b36_153416165	W1176	iPLEX	G6PD_X_b36_153416165	ACGTTGGATGAATGAGGAAGCCATGGCTTG	ACGTTGGATGTTCCCCTCCTGCCTCATGCT	120	86.4	64.6	49	66.7	s	R	4780.1	aGCCACTCAGACCCAC	G	5027.3	aGCCACTCAGACCCACC	C	5067.3	aGCCACTCAGACCCACG
G6PD_X_b36_153414937	W1176	iPLEX	G6PD_X_b36_153414937	ACGTTGGATGATGCACACCCCAGCTCAGT	ACGTTGGATGATGACGTCCGTGATGAGAAG	120	92	64.6	48	60	D	F	4882.2	gGTGCCTCGTCACAGA	C	5129.4	gGTGCCTCGTCACAGAC	T	5209.3	gGTGCCTCGTCACAGAT
rs762516	W1176	iPLEX	rs762516	ACGTTGGATGTTCAGTAGAACCAAGGGACG	ACGTTGGATGTGTAAGCACTTGAGGTCACG	91	99.7	64.6	46	50		F	4988.3	AGGGACGACAGAAGTA	C	5235.5	AGGGACGACAGAAGTAC	T	5315.4	AGGGACGACAGAAGTAT
rs5986875	W1176	iPLEX	rs5986875	ACGTTGGATGAGAACTCAGACAAGGGTGAC	ACGTTGGATGCTGTTGGCAAATCTGCAGGG	119	97.1	64.6	48	56.3	ds	R	5106.3	cAGGTCAGTTCCTCCAC	G	5353.5	cAGGTCAGTTCCTCCACC	A	5433.4	cAGGTCAGTTCCTCCACT
G6PD_X_b36_153411188	W1176	iPLEX	G6PD_X_b36_153411188	ACGTTGGATGCAGGACAATCGCTTGAACCC	ACGTTGGATGCAGAGCTGAAGGGACAGTTG	101	97.1	64.6	46	56.3	D	R	5164.4	cGAAGACCATCCACTGG	G	5411.6	cGAAGACCATCCACTGGC	A	5491.5	cGAAGACCATCCACTGGT
G6PD_X_b36_153416473	W1176	iPLEX	G6PD_X_b36_153416473	ACGTTGGATGACCACTCTATGAGCGTGTCC	ACGTTGGATGAACGCTGCCACCTTGTGGTC	110	92.6	64.6	49	60	Ds	R	5186.4	gtATCTGGGCAGCATCC	T	5457.6	gtATCTGGGCAGCATCCA	C	5473.6	gtATCTGGGCAGCATCCG
G6PD_X_b36_153423083	W1176	iPLEX	G6PD_X_b36_153423083	ACGTTGGATGAAAGCAGTTGGGAGCTTCTC	ACGTTGGATGTTGTGTCCTTGGGCAGATCC	105	98.5	64.6	46	52.9		F	5296.5	tCTTCTCATCTTCCCCAC	A	5567.7	tCTTCTCATCTTCCCCACA	G	5583.7	tCTTCTCATCTTCCCCACG
rs6643680	W1176	iPLEX	rs6643680	ACGTTGGATGTGGCATCTAGCAGGTACAGG	ACGTTGGATGTCAGTGCCATCGGCACCTG	109	89	64.6	50	58.8	D	R	5333.5	cGCTCCACACCCTACAAC	T	5604.7	cGCTCCACACCCTACAACA	C	5620.7	cGCTCCACACCCTACAACG
G6PD_X_b36_153414399	W1176	iPLEX	G6PD_X_b36_153414399	ACGTTGGATGGGACGACCCCACGGTGCC	ACGTTGGATGACCTCTCATTCTCCACATAG	97	59	64.6	61	82.4	ds	R	5390.5	aCCCGCGGGTCCACCACC	T	5661.7	aCCCGCGGGTCCACCACCA	C	5677.7	aCCCGCGGGTCCACCACCG
G6PD_X_b36_153429253	W1176	iPLEX	G6PD_X_b36_153429253	ACGTTGGATGTTCAGGCTCCCCCCTCTTTT	ACGTTGGATGAGTAACCTGGGTCCTGAATC	115	95.2	64.6	51	58.8	D	F	5392.5	aCCCCCTCTTTTTTGGGC	C	5639.7	aCCCCCTCTTTTTTGGGCC	T	5719.6	aCCCCCTCTTTTTTGGGCT
G6PD_X_b36_153427017	W1176	iPLEX	G6PD_X_b36_153427017	ACGTTGGATGTTTCACCATGTTGACCAGGC	ACGTTGGATGTCATCCCAGCACTTTGGGAG	102	98.5	64.6	46	56.3	Ds	R	5508.6	agGACCTCAAGTGATCCG	G	5755.8	agGACCTCAAGTGATCCGC	A	5835.7	agGACCTCAAGTGATCCGT
G6PD_X_b36_153414077	W1176	iPLEX	G6PD_X_b36_153414077	ACGTTGGATGATCTTCCACCAGCAGTGCAA	ACGTTGGATGCATCATCTTGGTGTACACGG	98	97.5	64.6	56	66.7	D	R	5531.6	CTGGTGATCCGCGTGCAG	G	5778.8	CTGGTGATCCGCGTGCAGC	C	5818.8	CTGGTGATCCGCGTGCAGG
hG6PD_plus202	W1176	iPLEX	hG6PD_plus202_E	ACGTTGGATGATGGCCTTCTGCCCGAAAAC	ACGTTGGATGTCACTCTGTTTGCGGATGTC	102	98.5	64.6	52	52.6	D	R	5701.7	GCCCGAAAACACCTTCATC	T	5972.9	GCCCGAAAACACCTTCATCA	C	5988.9	GCCCGAAAACACCTTCATCG
rs61042368	W1176	iPLEX	rs61042368	ACGTTGGATGTCCTAGAGCTTCACTGCTCG	ACGTTGGATGGCCAGAATTCAGTCTGCTTC	99	98.6	64.6	46	53.3	d	R	5701.7	ccaaTCGCCTCCACTAGAA	G	5948.9	ccaaTCGCCTCCACTAGAAC	A	6028.8	ccaaTCGCCTCCACTAGAAT
G6PD_X_b36_153412734	W1176	iPLEX	G6PD_X_b36_153412734	ACGTTGGATGAAGTGAGGAGGCTCCTCAGT	ACGTTGGATGTCATTTGCTTCCCTGAGGAC	110	95.7	64.6	48	60	D	F	5800.8	cgcaACAGAGGAAGCACCC	A	6072	cgcaACAGAGGAAGCACCCA	G	6088	cgcaACAGAGGAAGCACCCG
rs5986877	W1176	iPLEX	rs5986877	ACGTTGGATGACCTTGCTCTTCCCCCTTC	ACGTTGGATGGCAGAAGAGCTCTGCTTTAG	96	95.9	64.6	48	60	d	R	5918.8	cccccCTCAGGCACCCATCT	G	6166	cccccCTCAGGCACCCATCTC	C	6206.1	cccccCTCAGGCACCCATCTG
rs12837628	W1176	iPLEX	rs12837628	ACGTTGGATGTTTGAGACCCAGTCTCACTC	ACGTTGGATGAGGAGAATCGCTCAAACCTG	117	98.9	64.6	50	62.5	D	F	6044.9	gtccCGATCTTGGCTCACCG	C	6292.1	gtccCGATCTTGGCTCACCGC	G	6332.1	gtccCGATCTTGGCTCACCGG
G6PD_X_b36_153416596	W1176	iPLEX	G6PD_X_b36_153416596	ACGTTGGATGAACGGCAAGCCTTACATCTG	ACGTTGGATGCTCTTCTACCTGGCCTTGC	112	95.4	64.6	52	58.8	d	F	6118	cagCTGGCTCATGCAGGACT	C	6365.2	cagCTGGCTCATGCAGGACTC	T	6445.1	cagCTGGCTCATGCAGGACTT
rs1050831	W1176	iPLEX	rs1050831	ACGTTGGATGCCGTGCCACCCGTAGGCAG	ACGTTGGATGTTGCGGATTTAATGGCAGGG	115	72.8	64.6	57	68.8	s	R	6136	aagaAGCAGCTGGGACCCCT	G	6383.2	aagaAGCAGCTGGGACCCCTC	A	6463.1	aagaAGCAGCTGGGACCCCTT
rs6655250	W1176	iPLEX	rs6655250	ACGTTGGATGGAGAGGTTCAATGGACTCAC	ACGTTGGATGATGCCTTTGCTCATCCTTCG	102	100	64.6	47	50	D	R	6311.1	cccacTGGACTCACAGTTCCA	G	6558.3	cccacTGGACTCACAGTTCCAC	A	6638.2	cccacTGGACTCACAGTTCCAT
rs5986874	W1176	iPLEX	rs5986874	ACGTTGGATGTCCTCAGCAGCTGGGATTAC	ACGTTGGATGTGGTGAAACCCCGTCTCTAC	101	97.1	64.6	51	58.8	D	F	6348.1	tcttCATGTGCCACTACTGGC	C	6595.3	tcttCATGTGCCACTACTGGCC	T	6675.2	tcttCATGTGCCACTACTGGCT
rs12837311	W1176	iPLEX	rs12837311	ACGTTGGATGCGTAAATAGTTGTTTCACTG	ACGTTGGATGACAGAGTTGGACTGTGTCTC	94	87.6	64.6	45	41.2	D	R	6409.2	ggatTTGTTTCACTGTCTTGC	C	6696.4	ggatTTGTTTCACTGTCTTGCG	A	6736.3	ggatTTGTTTCACTGTCTTGCT
rs5945202	W1176	iPLEX	rs5945202	ACGTTGGATGCCCAAACATCTCAGTGGAG	ACGTTGGATGTCTGAGATCGGAGAAGAACC	114	97.7	64.6	46	35	D	R	6520.3	tAGTAAAGAATAACAAGGCAG	G	6767.5	tAGTAAAGAATAACAAGGCAGC	A	6847.4	tAGTAAAGAATAACAAGGCAGT
rs28458996	W1176	iPLEX	rs28458996	ACGTTGGATGAAGGGCGCATTGCATTAAGC	ACGTTGGATGTCTCCATTATCTCAAGTAGC	97	94.3	64.6	47	44.4		F	6541.3	aggACAGCTGTGATGGTTTAG	C	6788.4	aggACAGCTGTGATGGTTTAGC	G	6828.5	aggACAGCTGTGATGGTTTAGG
rs12396972	W1176	iPLEX	rs12396972	ACGTTGGATGCTCCTCTGGATCCTTTTTTG	ACGTTGGATGCTCTGCTATACCTATAGTT	114	83.8	64.6	49	42.9	d	R	6658.3	gCTGGATCCTTTTTTGATCTCC	G	6905.5	gCTGGATCCTTTTTTGATCTCCC	T	6929.5	gCTGGATCCTTTTTTGATCTCCA
rs5945200	W1176	iPLEX	rs5945200	ACGTTGGATGTTGAGATAGAGGAAGGCCAC	ACGTTGGATGCTCCGATCTCAGAATTGAAC	118	97.3	64.6	47	50	d	F	6719.4	accaCTGGGAACTGAATGTCTC	A	6990.6	accaCTGGGAACTGAATGTCTCA	G	7006.6	accaCTGGGAACTGAATGTCTCG
rs7879049	W1176	iPLEX	rs7879049	ACGTTGGATGTTTACCACAGCCCATGGCAC	ACGTTGGATGGCTCAGGGGAGTGAGAAAAG	95	92.8	64.6	49	52.9	Dsg	R	6809.4	aggggCATCCTGGCATAGAGCA	G	7056.6	aggggCATCCTGGCATAGAGCAC	A	7136.5	aggggCATCCTGGCATAGAGCAT
rs35622624	W1176	iPLEX	rs35622624	ACGTTGGATGTTCAACCCCACATTCTCACC	ACGTTGGATGAAGTATGGAGGCTGTGAAGG	110	99.6	64.6	48	42.1	d	R	6956.5	gtcgCACCACCTGTTTCTTTGAT	G	7203.7	gtcgCACCACCTGTTTCTTTGATC	C	7243.7	gtcgCACCACCTGTTTCTTTGATG
rs11797720	W1176	iPLEX	rs11797720	ACGTTGGATGTTCGAAAGCCTACCAAGGAG	ACGTTGGATGTGTCTTTCCTATGAGTGCAG	111	98.1	64.6	46	38.9		R	7031.6	aaccaAATTGTCCAGCTTGTAGA	T	7302.8	aaccaAATTGTCCAGCTTGTAGAA	C	7318.8	aaccaAATTGTCCAGCTTGTAGAG
rs5986993	W1176	iPLEX	rs5986993	ACGTTGGATGTCATCCTTTGGTTCCTGCTG	ACGTTGGATGATGACTCCTGCAAGGAAGGG	103	98.5	64.6	54	61.1	dg	F	7073.6	gactaCTGGGGACTCAGGCCTAA	A	7344.8	gactaCTGGGGACTCAGGCCTAAA	G	7360.8	gactaCTGGGGACTCAGGCCTAAG
rs35228794	W1176	iPLEX	rs35228794	ACGTTGGATGGGAAGGTTTTTGTTTTTGGG	ACGTTGGATGTCTGGTGCATTGCAGATTGG	96	94.3	64.6	50	30.4	D	F	7105.6	TTGTTTTTGGGTAATGATTGTCA	A	7376.8	TTGTTTTTGGGTAATGATTGTCAA	G	7392.8	TTGTTTTTGGGTAATGATTGTCAG
G6PD_X_b36_153424456	W1177	iPLEX	G6PD_X_b36_153424456	ACGTTGGATGCAGCAGATTCTAGGATCACG	ACGTTGGATGTTCTTCCACGCCTGATGCCT	100	96.1	66.1	50	66.7	DS	F	4408.9	ACCCTGCCTACCTCC	C	4656.1	ACCCTGCCTACCTCCC	T	4736	ACCCTGCCTACCTCCT
G6PD_X_b36_153416019	W1177	iPLEX	G6PD_X_b36_153416019	ACGTTGGATGTGCATCATTCAGACGCCCTC	ACGTTGGATGATCTGGGAACACAAGGCACG	106	97	66.1	49	66.7	D	F	4457.9	CCAGAACCTCCTCGC	C	4705.1	CCAGAACCTCCTCGCC	T	4785	CCAGAACCTCCTCGCT
G6PD_X_b36_153416108	W1177	iPLEX	G6PD_X_b36_153416108	ACGTTGGATGACCCAGCATGAGGCAGGAG	ACGTTGGATGAACACCTTCCGGGAAGCCTT	113	86.5	66.1	50	60	Ds	R	4562	GCATGCCAGCAATGC	G	4809.2	GCATGCCAGCAATGCC	A	4889.1	GCATGCCAGCAATGCT
G6PD_X_b36_153416670	W1177	iPLEX	G6PD_X_b36_153416670	ACGTTGGATGAGGTAGAAGAGGCGGTTGG	ACGTTGGATGATGATGCAGCCTCCTACCAG	102	94.6	66.1	50	66.7	D	F	4600	CGGTTGGCCTGTGAC	C	4847.2	CGGTTGGCCTGTGACC	A	4871.2	CGGTTGGCCTGTGACA
rs7064060	W1177	iPLEX	rs7064060	ACGTTGGATGAATCGCTTGAACCCAGGAGG	ACGTTGGATGACGGAGTTTTGCTCTGGTCG	107	97	66.1	47	60	d	F	4673	GAGGTTGCAGTGAGC	C	4920.2	GAGGTTGCAGTGAGCC	T	5000.1	GAGGTTGCAGTGAGCT
G6PD_X_b36_153414129	W1177	iPLEX	G6PD_X_b36_153414129	ACGTTGGATGAAGGCCCTGAACGAGCGCAA	ACGTTGGATGATCACCAGCTCGTTGCGCTT	118	87.2	66.1	50	66.7	d	R	4938.2	gCCATGATGTGGCCGG	G	5185.4	gCCATGATGTGGCCGGC	A	5265.3	gCCATGATGTGGCCGGT
G6PD_X_b36_153412861	W1177	iPLEX	G6PD_X_b36_153412861	ACGTTGGATGTTAATGGCAGGGCATTGAGG	ACGTTGGATGCCGTGCCACCCGTAGGCAG	107	73.3	66.1	57	64.7	D	F	5113.3	TCCCAGCTGCTGCGTCT	A	5384.5	TCCCAGCTGCTGCGTCTA	G	5400.5	TCCCAGCTGCTGCGTCTG
G6PD_X_b36_153414709	W1177	iPLEX	G6PD_X_b36_153414709	ACGTTGGATGTGCTTGGCTCTGCTCACCCT	ACGTTGGATGTCAGAATAGACTCGAGATGG	114	89.9	66.1	50	66.7	D	F	5115.3	ttGACCCTCCAGGACCA	C	5362.5	ttGACCCTCCAGGACCAC	T	5442.4	ttGACCCTCCAGGACCAT
rs12389569	W1177	iPLEX	rs12389569	ACGTTGGATGTTGGAGCTCACAGGAGCACT	ACGTTGGATGGTGAGTCACCCTATGGAATG	96	96	66.1	53	64.7	d	R	5211.4	GAGCACTGAGGCCCTTG	G	5458.6	GAGCACTGAGGCCCTTGC	A	5538.5	GAGCACTGAGGCCCTTGT
rs61309512	W1177	iPLEX	rs61309512	ACGTTGGATGTATTCCCAGCACTTTGGGAG	ACGTTGGATGAAGTAGAGACTGGGTTTCGC	116	99	66.1	58	70.6	s	R	5316.5	GGCCGAGGCAGGTGGAT	G	5563.6	GGCCGAGGCAGGTGGATC	A	5643.5	GGCCGAGGCAGGTGGATT
rs1894260	W1177	iPLEX	rs1894260	ACGTTGGATGATCTCTCAAGGTTTCACCCC	ACGTTGGATGAAAGCTCTGAGTACACTGCG	113	99.3	66.1	50	52.9	D	R	5339.5	TGGGTAGGAGCTGGAAA	T	5610.7	TGGGTAGGAGCTGGAAAA	C	5626.7	TGGGTAGGAGCTGGAAAG
rs1050757	W1177	iPLEX	rs1050757	ACGTTGGATGTATTGGCCACTGGGTCTCAC	ACGTTGGATGATTCTCTCACGTGGGTGCTC	110	96.8	66.1	57	76.5	D	R	5421.5	GGGTGGGAGGGAGGGAC	T	5692.7	GGGTGGGAGGGAGGGACA	C	5708.7	GGGTGGGAGGGAGGGACG
G6PD_X_b36_153415894	W1177	iPLEX	G6PD_X_b36_153415894	ACGTTGGATGTCCCGAAGGGCTTCTCCAC	ACGTTGGATGTGATCCTCACTCCCCGAAGA	117	82.3	66.1	50	55.6	D	F	5490.6	GGCTTCTCCACGATGATG	C	5737.8	GGCTTCTCCACGATGATGC	T	5817.7	GGCTTCTCCACGATGATGT
rs56191948	W1177	iPLEX	rs56191948	ACGTTGGATGAGTAACCTGGGTCCTGAATC	ACGTTGGATGAGGCTCCCCCCTCTTTTTTG	112	98	66.1	56	73.3	D	R	5661.7	ccccCCCGCCTTGGCCAGT	T	5932.9	ccccCCCGCCTTGGCCAGTA	C	5948.9	ccccCCCGCCTTGGCCAGTG
rs6643679	W1177	iPLEX	rs6643679	ACGTTGGATGAAGGCTGGAGCCCTGTTTTC	ACGTTGGATGTTGTGGCTGAATTCTTTGGC	80	95.6	66.1	55	52.6		R	5665.7	AGCCCTGTTTTCACCCCTT	G	5912.9	AGCCCTGTTTTCACCCCTTC	A	5992.8	AGCCCTGTTTTCACCCCTTT
G6PD_X_b36_153427408	W1177	iPLEX	G6PD_X_b36_153427408	ACGTTGGATGTCATCATCATGGGTGCATCG	ACGTTGGATGTTGGAAAAGCTGAGGCATGG	107	99.8	66.1	49	47.4	D	R	5765.8	CCCAATCTTAAAAGCCAGG	T	6037	CCCAATCTTAAAAGCCAGGA	C	6053	CCCAATCTTAAAAGCCAGGG
G6PD_X_b36_153415121	W1177	iPLEX	G6PD_X_b36_153415121	ACGTTGGATGTCCCCATGCCCTTGAACCAG	ACGTTGGATGAGGTGGTTCTGCATCACGTC	110	92.6	66.1	54	57.9	D	R	5797.8	GCCCTTGAACCAGGTGAAC	T	6069	GCCCTTGAACCAGGTGAACA	C	6085	GCCCTTGAACCAGGTGAACG
G6PD_X_b36_153411257	W1177	iPLEX	G6PD_X_b36_153411257	ACGTTGGATGGGGTTCAAGCGATTGTCCTG	ACGTTGGATGAAAATTTGCCAGGCGTGGTG	98	98.5	66.1	50	58.8	DS	F	5868.8	gaCTCCTGAGTAGCTGGGA	C	6116	gaCTCCTGAGTAGCTGGGAC	A	6140	gaCTCCTGAGTAGCTGGGAA
rs7881468	W1177	iPLEX	rs7881468	ACGTTGGATGAAGTGTTGGGATTACAGGCG	ACGTTGGATGCAGGATTTGGTTTGCTGATG	110	98.2	66.1	53	73.3	d	F	5894.8	ggtgCAGGCGTGAGCCACG	A	6166	ggtgCAGGCGTGAGCCACGA	G	6182	ggtgCAGGCGTGAGCCACGG
rs28470352	W1177	iPLEX	rs28470352	ACGTTGGATGGGTGAGAAAATGTTGGTGGC	ACGTTGGATGAAGAGCGAGACTCCGACTTA	116	97.7	66.1	47	41.2	DS	F	6018.9	ccgTTGTTTGCACTTCACCA	A	6290.1	ccgTTGTTTGCACTTCACCAA	T	6346	ccgTTGTTTGCACTTCACCAT
rs2515907	W1177	iPLEX	rs2515907	ACGTTGGATGTGGTGGAGGTTGCAGTGAAC	ACGTTGGATGGACAGACTCTTGCTCTTTCG	97	98.5	66.1	46	47.1		F	6206.1	aggTGCAGTGAACTGAGATC	A	6477.3	aggTGCAGTGAACTGAGATCA	G	6493.3	aggTGCAGTGAACTGAGATCG
rs2004651	W1177	iPLEX	rs2004651	ACGTTGGATGGACATGGGAAATAGGGAAGG	ACGTTGGATGTGGGTATCCAAACAGGAAGC	110	99.6	66.1	46	40	D	R	6263.1	GAAATAGGGAAGGTGATAAC	G	6510.3	GAAATAGGGAAGGTGATAACC	T	6534.3	GAAATAGGGAAGGTGATAACA
rs34193178	W1177	iPLEX	rs34193178	ACGTTGGATGATGCCCAGTTCTGCCTTGCT	ACGTTGGATGCACTTTTGCAGCCGTCGTC	109	91.9	66.1	48	47.1	D	F	6310.1	ctctAAGGCATCACCTACCAT	C	6557.3	ctctAAGGCATCACCTACCATC	G	6597.3	ctctAAGGCATCACCTACCATG
rs5986997	W1177	iPLEX	rs5986997	ACGTTGGATGATTCTACTGGGATGGGACAC	ACGTTGGATGTGCACAGGAATATCTAGCCC	95	99.9	66.1	47	36.8	D	R	6377.2	aaTGGCTTGTCTTCTACATTT	T	6648.4	aaTGGCTTGTCTTCTACATTTA	C	6664.4	aaTGGCTTGTCTTCTACATTTG
rs7053878	W1177	iPLEX	rs7053878	ACGTTGGATGGCAACAGAGGAGATGCTGTC	ACGTTGGATGACGGTCTGCTCCATAAGAGG	99	97.1	66.1	46	30		F	6446.2	tAGATGCTGTCTCAAAAAAAA	A	6717.5	tAGATGCTGTCTCAAAAAAAAA	T	6773.3	tAGATGCTGTCTCAAAAAAAAT
rs743544	W1177	iPLEX	rs743544	ACGTTGGATGGGGTTGTCTGTTTCTATTCG	ACGTTGGATGGCTAACCCAAAGAAAAGATG	91	92.7	66.1	47	31.8	D	R	6619.3	GTCTTTTTCAAACACCAATTTC	G	6866.5	GTCTTTTTCAAACACCAATTTCC	A	6946.4	GTCTTTTTCAAACACCAATTTCT
rs2515910	W1177	iPLEX	rs2515910	ACGTTGGATGGACAGCTTTTGAAACGAGGG	ACGTTGGATGCGGAGGCAGTGAAATGACAA	91	97.2	66.1	55	70.6	D	R	6752.4	ccgatGGCCCAGGGTCCTTAGG	G	6999.6	ccgatGGCCCAGGGTCCTTAGGC	A	7079.5	ccgatGGCCCAGGGTCCTTAGGT
rs3205649	W1177	iPLEX	rs3205649	ACGTTGGATGCTGCTCTCCTACTGCATTCC	ACGTTGGATGACACCAAGGACCTGCACTG	114	93.8	66.1	46	27.3		F	6808.5	TAATCAATAAAAACTGAGGGAA	C	7055.7	TAATCAATAAAAACTGAGGGAAC	T	7135.6	TAATCAATAAAAACTGAGGGAAT
rs11156578	W1177	iPLEX	rs11156578	ACGTTGGATGCAACACCCGTAAAGGGTCTG	ACGTTGGATGTGGCCTTCCTCTATCTCAAC	98	98.5	66.1	51	50	d	F	6828.4	cggtTCTGTGCTGAGGTGGATT	A	7099.6	cggtTCTGTGCTGAGGTGGATTA	G	7115.6	cggtTCTGTGCTGAGGTGGATTG
rs60030796	W1177	iPLEX	rs60030796	ACGTTGGATGCGATTAACTGGACATTGTGC	ACGTTGGATGGAGTGGTCTTGGCCAAAAAG	100	96.3	66.1	46	25	D	R	7465.9	GGAAAATATAATGAATTCGAGAAA	G	7713.1	GGAAAATATAATGAATTCGAGAAAC	A	7793	GGAAAATATAATGAATTCGAGAAAT

## Sheet: Supplementary file 2C
SNP_NAME	WELL	TERM	ASSAY_VERSION	2nd-PCRP	1st-PCRP	amp_len	up_conf	mp_conf	TM(NN)	PcGC	pwarn	uep_dir	uep_mass	UEP_SEQ	ext1_call	ext1_mass	ext1_seq	ext2_call	ext2_mass	ext2_seq	ext3_call	ext3_mass	ext3_seq	ext4_call	ext4_mass	ext4_seq	first_pause
rs2230037	W1186	iPLEX	rs2230037	ACGTTGGATGCATCAGCAAGACACTCTCTC	ACGTTGGATGCAGAAGACGTCCAGGATGAG	98	98.5	64.1	51	66.7		R	4488.9	GCTCCCTGACGCCTA	G	4736.1	GCTCCCTGACGCCTAC	A	4816	GCTCCCTGACGCCTAT
hG6PD_968	W1186	iPLEX	hG6PD_968_A	ACGTTGGATGTGGGGAACCCCGATGGAGA	ACGTTGGATGACGACGGCTGCAAAAGTGG	117	80.1	64.1	46	60	Dg	F	4531	CCACCAAAGGGTACC	C	4778.2	CCACCAAAGGGTACCC	T	4858.1	CCACCAAAGGGTACCT
G6PD_X_b36_153416679	W1186	iPLEX	G6PD_X_b36_153416679	ACGTTGGATGAGGTAGAAGAGGCGGTTGG	ACGTTGGATGATGATGCAGCCTCCTACCAG	102	94.6	64.1	51	66.7	D	F	4609	TGTGACCCCAGGTGG	A	4880.2	TGTGACCCCAGGTGGA	G	4896.2	TGTGACCCCAGGTGGG
hG6PD_542	W1186	iPLEX	hG6PD_542_A	ACGTTGGATGAGATCTGGTCCTCACGGAAC	ACGTTGGATGATCATCGTGGAGAAGCCCTT	111	95.6	64.1	52	66.7	D	R	4649	TGGTTGGACAGCCGG	T	4920.2	TGGTTGGACAGCCGGA	A	4976.1	TGGTTGGACAGCCGGT
G6PD_X_b36_153415014	W1186	iPLEX	G6PD_X_b36_153415014	ACGTTGGATGAGAACCACCTACTGCAGATG	ACGTTGGATGTTCTCATCACGGACGTCATC	102	100	64.1	52	73.3	D	R	4836.2	aGAGAAGCCCGCCTCC	T	5107.4	aGAGAAGCCCGCCTCCA	A	5163.3	aGAGAAGCCCGCCTCCT
rs2515904	W1186	iPLEX	rs2515904	ACGTTGGATGAGCTGCGTTACCCCCTTGA	ACGTTGGATGTGGGAGGGCGTCTGAATGAT	91	89.6	64.1	50	62.5	Dg	F	5011.3	CGGGGAGTGAGGATCA	C	5258.5	CGGGGAGTGAGGATCAC	G	5298.5	CGGGGAGTGAGGATCAG
hG6PD_680	W1186	iPLEX	hG6PD_680_A	ACGTTGGATGTTTGCCAACAGGATCTTCGG	ACGTTGGATGCCTTGAAGGTGAGGATAACG	90	99.6	64.1	49	66.7	D	F	5076.3	ccGCCCCATCTGGAACC	G	5363.5	ccGCCCCATCTGGAACCG	T	5403.4	ccGCCCCATCTGGAACCT
G6PD_X_b36_153413799	W1186	iPLEX	G6PD_X_b36_153413799_A	ACGTTGGATGTCAATCTGGTGCAGCAGTGG	ACGTTGGATGTCATCCTGGACGTCTTCTGC	225	97	64.1	51	58.8	d	R	5186.4	GCCAGATGCACTTCGTG	G	5433.6	GCCAGATGCACTTCGTGC	A	5513.5	GCCAGATGCACTTCGTGT
G6PD_X_b36_153427466	W1186	iPLEX	G6PD_X_b36_153427466	ACGTTGGATGCCTGGCTTTTAAGATTGGG	ACGTTGGATGGCCTTCCATCAGTCGGATAC	104	96.4	64.1	47	47.1	D	F	5203.4	GCACCCATGATGATGAA	C	5450.6	GCACCCATGATGATGAAC	T	5530.5	GCACCCATGATGATGAAT
rs5986990	W1186	iPLEX	rs5986990	ACGTTGGATGAAGTCACCACCTCTGAGCAC	ACGTTGGATGCTGGGACATGACAACTTGGG	102	97.1	64.1	54	58.8	d	R	5226.4	TGACCTGGACTGGCAGT	G	5473.6	TGACCTGGACTGGCAGTC	A	5553.5	TGACCTGGACTGGCAGTT
rs2230036	W1186	iPLEX	rs2230036	ACGTTGGATGAAGGCCCTGAACGAGCGCAA	ACGTTGGATGTGCACTGCTGGTGGAAGATG	99	90.6	64.1	52	66.7	Ds	R	5316.5	ggCGAGGTGAGGCTGCA	T	5587.7	ggCGAGGTGAGGCTGCAA	C	5603.7	ggCGAGGTGAGGCTGCAG
G6PD_X_b36_153413666	W1186	iPLEX	G6PD_X_b36_153413666_A	ACGTTGGATGTCAATCTGGTGCAGCAGTGG	ACGTTGGATGTCATCCTGGACGTCTTCTGC	225	86.9	64.1	47	47.1	g	F	5323.5	GCAGTGGGGTGAAAATA	C	5570.7	GCAGTGGGGTGAAAATAC	T	5650.6	GCAGTGGGGTGAAAATAT
rs2515905	W1186	iPLEX	rs2515905	ACGTTGGATGAGTGTCTGAGCTATCAGACC	ACGTTGGATGGGTGATGCTATCACTGAATC	110	98.2	64.1	54	61.1	D	R	5382.5	CCCTACACAGCCAAGCAC	G	5629.7	CCCTACACAGCCAAGCACC	A	5709.6	CCCTACACAGCCAAGCACT
G6PD_X_b36_153412566	W1186	iPLEX	G6PD_X_b36_153412566	ACGTTGGATGATTGTGAGACCAGCTTGAGG	ACGTTGGATGTTGCTGGAAGTCATCTTGGG	111	99.5	64.1	49	66.7	Dg	R	5731.7	ctccGTGGGGTCACCTTCC	T	6002.9	ctccGTGGGGTCACCTTCCA	C	6018.9	ctccGTGGGGTCACCTTCCG
G6PD_X_b36_153414531	W1186	iPLEX	G6PD_X_b36_153414531	ACGTTGGATGCATTCTCTCCCTTGGCTTTC	ACGTTGGATGAGGACCACATTGTTGGCCTG	96	98.5	64.1	48	50	D	R	5769.8	tGCTTTCTCTCAGGTCAAG	T	6041	tGCTTTCTCTCAGGTCAAGA	C	6057	tGCTTTCTCTCAGGTCAAGG
rs762515	W1186	iPLEX	rs762515	ACGTTGGATGTGGCACAGGCTTGAATCTCG	ACGTTGGATGCTACTCAGGATCACTACTGG	105	98.5	64.1	48	56.3	D	R	5816.8	gatGGGCTCTTCTGTCTGT	T	6088	gatGGGCTCTTCTGTCTGTA	C	6104	gatGGGCTCTTCTGTCTGTG
G6PD_X_b36_153414758	W1186	iPLEX	G6PD_X_b36_153414758	ACGTTGGATGGACAGTCACTATGTGACCAG	ACGTTGGATGGGTCCATCTCGAGTCTATTC	99	100	64.1	51	62.5	D	R	5918.8	gggCAGGGAAGGCCATTGC	G	6166	gggCAGGGAAGGCCATTGCC	A	6245.9	gggCAGGGAAGGCCATTGCT
G6PD_X_b36_153417405	W1186	iPLEX	G6PD_X_b36_153417405	ACGTTGGATGTCACTCTGTTTGCGGATGTC	ACGTTGGATGATGGCCTTCTGCCCGAAAAC	102	98.5	64.1	56	73.3	d	F	5934.8	gtgcGGCGGGAACGGGCAT	A	6206.1	gtgcGGCGGGAACGGGCATA	G	6222.1	gtgcGGCGGGAACGGGCATG
G6PD_X_b36_153428979	W1186	iPLEX	G6PD_X_b36_153428979	ACGTTGGATGTCAGACTTCTCTCCGGAGC	ACGTTGGATGAAGTAAAAACACAAGCCCCG	116	89.5	64.1	49	66.7	D	F	6134	ggagaCGGCTTCCCGAGTTC	C	6381.2	ggagaCGGCTTCCCGAGTTCC	T	6461.1	ggagaCGGCTTCCCGAGTTCT
rs12393550	W1186	iPLEX	rs12393550	ACGTTGGATGAAAGTGGCCAGGGAGGAGTG	ACGTTGGATGTTCTACGACATCGGGCCCTG	109	88.8	64.1	58	66.7	Ds	R	6185	aaCCGCAGCACAGGTGAGGA	G	6432.2	aaCCGCAGCACAGGTGAGGAC	A	6512.1	aaCCGCAGCACAGGTGAGGAT
G6PD_X_b36_153426354	W1186	iPLEX	G6PD_X_b36_153426354	ACGTTGGATGCCTGGATGCACTCAAGAATC	ACGTTGGATGACTAGTTTTGATAGAGCTCC	118	93.1	64.1	47	38.1	d	R	6300.1	CCATTAACTTACCTTGTAACC	C	6587.3	CCATTAACTTACCTTGTAACCG	A	6627.2	CCATTAACTTACCTTGTAACCT
rs2515906	W1186	iPLEX	rs2515906	ACGTTGGATGTGGCTCAAGCGTGTAATCTC	ACGTTGGATGAGGCTGGTCTTGAACTTCTG	99	100	64.1	47	44.4	d	R	6317.1	cccCGTGTAATCTCAGCACTT	G	6564.3	cccCGTGTAATCTCAGCACTTC	A	6644.2	cccCGTGTAATCTCAGCACTTT
G6PD_X_b36_153424232	W1186	iPLEX	G6PD_X_b36_153424232	ACGTTGGATGTTCAGGCTGACGTGTGTTTC	ACGTTGGATGCTCTTTGTGGGATCTATGCG	100	100	64.1	49	42.9	d	R	6485.2	GACGTGTGTTTCAGAAGATAC	T	6756.4	GACGTGTGTTTCAGAAGATACA	C	6772.4	GACGTGTGTTTCAGAAGATACG
G6PD_X_b36_153413991	W1186	iPLEX	G6PD_X_b36_153413991	ACGTTGGATGAGATGATGACCAAGAAGCCG	ACGTTGGATGTCTGTAGGGCACCTTGTATC	112	99.4	64.1	50	58.8	d	R	6487.2	gggtGAGCTGGACCTGACCTA	G	6734.4	gggtGAGCTGGACCTGACCTAC	A	6814.3	gggtGAGCTGGACCTGACCTAT
G6PD_X_b36_153426720	W1186	iPLEX	G6PD_X_b36_153426720	ACGTTGGATGCTCTGCCTCTTCACTAACAC	ACGTTGGATGCGAAATTGAGGCAAAGAGAC	104	98.5	64.1	47	31.8	d	R	6668.4	GATACAAACACTTAGCTTTTCT	G	6915.6	GATACAAACACTTAGCTTTTCTC	A	6995.5	GATACAAACACTTAGCTTTTCTT
G6PD_X_b36_153429686	W1186	iPLEX	G6PD_X_b36_153429686	ACGTTGGATGTGCGTAAAAGCCAATCTCCC	ACGTTGGATGAGCACAGTTGGAGAGGAAGG	101	98.6	64.1	55	63.2	D	R	6689.4	caaGGCCTACAAGGCCCTGTAC	G	6936.5	caaGGCCTACAAGGCCCTGTACC	T	6960.6	caaGGCCTACAAGGCCCTGTACA
G6PD_X_b36_153422839	W1186	iPLEX	G6PD_X_b36_153422839	ACGTTGGATGTGAGGTAAGACGGACAGTAG	ACGTTGGATGTCAGCTTAGCTCCCTGTCAC	92	98.3	64.1	61	72.2	Dg	F	6857.4	tggcGGGGTAAGGCAGGCCGCT	C	7104.6	tggcGGGGTAAGGCAGGCCGCTC	A	7128.6	tggcGGGGTAAGGCAGGCCGCTA
rs28534384	W1186	iPLEX	rs28534384	ACGTTGGATGAAAGTCTTGGAACATGTCCG	ACGTTGGATGGTGCATCAGGGTAGCCTTC	119	93.2	64.1	53	55.6	Ds	R	6976.5	ccccgTCGTGGCCTTTGGAACAC	G	7223.7	ccccgTCGTGGCCTTTGGAACACC	C	7263.7	ccccgTCGTGGCCTTTGGAACACG
G6PD_X_b36_153426256	W1186	iPLEX	G6PD_X_b36_153426256	ACGTTGGATGCTGAGCTCAGTGGTTCTTTG	ACGTTGGATGCAAAGGTGTCAAGGAGTAGG	96	99.9	64.1	50	38.1	D	R	7031.6	gaTTTGTTCACATAGAACAACGC	T	7302.8	gaTTTGTTCACATAGAACAACGCA	C	7318.8	gaTTTGTTCACATAGAACAACGCG
rs5986992	W1186	iPLEX	rs5986992	ACGTTGGATGAGGGAGGAGTAGAAACAGTC	ACGTTGGATGTTCTGGAGCACTGGCCAAG	100	96	64.1	50	52.6	d	R	7048.6	gaacGTAACCTGGGTCCTGAATC	C	7335.8	gaacGTAACCTGGGTCCTGAATCG	A	7375.7	gaacGTAACCTGGGTCCTGAATCT
rs762517	W1186	iPLEX	rs762517	ACGTTGGATGACGTGACCTCAAGTGCTTAC	ACGTTGGATGCTGGCCCTTTTTCTCACTTC	110	99.6	64.1	46	26.1	d	F	7161.7	AAAAAGAGTGGTTCAAAAATAAG	A	7432.9	AAAAAGAGTGGTTCAAAAATAAGA	G	7448.9	AAAAAGAGTGGTTCAAAAATAAGG
G6PD_X_b36_153424319	W1187	iPLEX	G6PD_X_b36_153424319	ACGTTGGATGACAGCGATTGGGTACTTCTG	ACGTTGGATGTTACTTGCCGTGGTTCCCTG	113	97.9	63.4	52	66.7	Ds	R	4399.9	TCCCTGCCCTCCTCA	G	4647	TCCCTGCCCTCCTCAC	A	4727	TCCCTGCCCTCCTCAT
rs2071429	W1187	iPLEX	rs2071429	ACGTTGGATGTTTGCCCTCCCTCCCTGTGT	ACGTTGGATGGCAGCAGTGGGGTGAAAATA	120	88.2	63.4	46	60	g	R	4441.9	CCTCCCAAGCCATAC	G	4689.1	CCTCCCAAGCCATACC	A	4769	CCTCCCAAGCCATACT
rs6643678	W1187	iPLEX	rs6643678	ACGTTGGATGTTGTGGCTGAATTCTTTGGC	ACGTTGGATGAAGGCTGGAGCCCTGTTTTC	80	95.6	63.4	50	53.3	D	F	4608	TTGGCATTGCAGGCA	A	4879.2	TTGGCATTGCAGGCAA	G	4895.2	TTGGCATTGCAGGCAG
G6PD_X_b36_153415799	W1187	iPLEX	G6PD_X_b36_153415799	ACGTTGGATGATCTCCTTGCCCAGGTAGTG	ACGTTGGATGCGGCTGTCCAACCACATCT	97	92.1	63.4	46	60	D	F	4664	GGTAGTGGTCGATGC	A	4935.2	GGTAGTGGTCGATGCA	G	4951.2	GGTAGTGGTCGATGCG
G6PD_X_b36_153417417	W1187	iPLEX	G6PD_X_b36_153417417	ACGTTGGATGTGTTCCGGGATGGCCTTCTG	ACGTTGGATGTCACTCTGTTTGCGGATGTC	111	93.9	63.4	50	56.3	d	R	4795.1	TCTGCCCGAAAACACC	T	5066.4	TCTGCCCGAAAACACCA	A	5122.2	TCTGCCCGAAAACACCT
G6PD_X_b36_153414378	W1187	iPLEX	G6PD_X_b36_153414378	ACGTTGGATGTGCCCCGCGGGTCCACCAC	ACGTTGGATGTCGAAGGCATCACCTACCAT	106	61.4	63.4	51	56.3	d	R	4839.1	TTTTGCAGCCGTCGTC	G	5086.3	TTTTGCAGCCGTCGTCC	A	5166.2	TTTTGCAGCCGTCGTCT
G6PD_X_b36_153413623	W1187	iPLEX	G6PD_X_b36_153413623	ACGTTGGATGTTTTCACCCCACTGCTGCAC	ACGTTGGATGCACCTGCCATAAATATAGGG	90	96.8	63.4	48	60	DS	R	4971.2	gTGAGCTGGAGAAGCC	G	5218.4	gTGAGCTGGAGAAGCCC	A	5298.3	gTGAGCTGGAGAAGCCT
G6PD_X_b36_153416656	W1187	iPLEX	G6PD_X_b36_153416656	ACGTTGGATGTTGGTGACGGCCTCGTAGAC	ACGTTGGATGAGCGCCTCAACAGCCACAT	120	86.9	63.4	49	62.5	D	F	4980.3	GCCAGGTAGAAGAGGC	A	5251.5	GCCAGGTAGAAGAGGCA	G	5267.5	GCCAGGTAGAAGAGGCG
rs7887673	W1187	iPLEX	rs7887673	ACGTTGGATGTGTGGCTTCCTCATCCCCTC	ACGTTGGATGGGCTTCTTAACTAGCACTTC	119	91.7	63.4	52	68.8	dg	F	5196.4	cGGGGCCAGAGTTCACC	A	5467.6	cGGGGCCAGAGTTCACCA	G	5483.6	cGGGGCCAGAGTTCACCG
G6PD_X_b36_153411172	W1187	iPLEX	G6PD_X_b36_153411172	ACGTTGGATGTCCTGCCTCCACCCAAGTAG	ACGTTGGATGAGGTGGAAGACCATCCACTG	103	93	63.4	47	56.3	D	F	5315.5	gGCTGAAGGGACAGTTG	C	5562.6	gGCTGAAGGGACAGTTGC	G	5602.7	gGCTGAAGGGACAGTTGG
G6PD_X_b36_153413455	W1187	iPLEX	G6PD_X_b36_153413455	ACGTTGGATGAGGCAGACGAGCTGATGAAG	ACGTTGGATGGTTCACCCACTTGTAGGTGC	82	95.9	63.4	46	47.1	d	R	5354.5	GATGAAGAGAGTGGGTT	C	5641.7	GATGAAGAGAGTGGGTTG	A	5681.6	GATGAAGAGAGTGGGTTT
G6PD_X_b36_153415904	W1187	iPLEX	G6PD_X_b36_153415904	ACGTTGGATGTGATCCTCACTCCCCGAAGA	ACGTTGGATGAGGGCTTCTCCACGATGATG	111	94.2	63.4	60	72.2		R	5445.5	CTCCGGGCTCCCAGCAGA	T	5716.7	CTCCGGGCTCCCAGCAGAA	C	5732.7	CTCCGGGCTCCCAGCAGAG
G6PD_X_b36_153424389	W1187	iPLEX	G6PD_X_b36_153424389	ACGTTGGATGAGAAGTACCCAATCGCTGTC	ACGTTGGATGGCACGTGATCCTAGAATCTG	99	100	63.4	47	47.1	D	F	5581.7	gGCTCAATGAACGGAGAA	C	5828.8	gGCTCAATGAACGGAGAAC	T	5908.8	gGCTCAATGAACGGAGAAT
rs2472393	W1187	iPLEX	rs2472393	ACGTTGGATGAGCACCTGGAACAGCTCCG	ACGTTGGATGTAGGATCACGTGCCCTCAAG	119	88	63.4	54	73.3	D	R	5750.7	gggcACAGCTCCGGCTCCC	T	6021.9	gggcACAGCTCCGGCTCCCA	C	6037.9	gggcACAGCTCCGGCTCCCG
G6PD_X_b36_153412691	W1187	iPLEX	G6PD_X_b36_153412691	ACGTTGGATGACACCAAACATGGTCATGGC	ACGTTGGATGTGCTTCCTCTGTGGCCACTG	97	94.3	63.4	52	55.6	Dsg	F	5877.8	cCTGGACATGGGGTCAGAA	C	6125	cCTGGACATGGGGTCAGAAC	T	6204.9	cCTGGACATGGGGTCAGAAT
G6PD_X_b36_153423752	W1187	iPLEX	G6PD_X_b36_153423752	ACGTTGGATGAACTAAGGCCCAGAGAAGTG	ACGTTGGATGATGATGCTGGAGAGCTTCAC	105	99.9	63.4	48	50	d	F	5938.9	tcTCAATCCCAGTCTCTTCC	C	6186.1	tcTCAATCCCAGTCTCTTCCC	T	6266	tcTCAATCCCAGTCTCTTCCT
G6PD_X_b36_153427470	W1187	iPLEX	G6PD_X_b36_153427470	ACGTTGGATGGCGATGCCTTCCATCAGTC	ACGTTGGATGCTGGGAGATACTCACCGATG	88	94	63.4	49	47.4	D	R	6061	aTTCCATCAGTCGGATACAC	T	6332.2	aTTCCATCAGTCGGATACACA	C	6348.2	aTTCCATCAGTCGGATACACG
G6PD_X_b36_153417577	W1187	iPLEX	G6PD_X_b36_153417577	ACGTTGGATGTGGGACACACTTACCAGATG	ACGTTGGATGTCTAACCACACACCTGTTCC	103	100	63.4	49	45	Dg	F	6145	TGGGGTAGATCTTCTTCTTG	C	6392.2	TGGGGTAGATCTTCTTCTTGC	G	6432.2	TGGGGTAGATCTTCTTCTTGG
G6PD_X_b36_153426402	W1187	iPLEX	G6PD_X_b36_153426402	ACGTTGGATGTGGCAAAGATGGTCATACAG	ACGTTGGATGTACACGTGGTCTCAGTTTTC	102	97.1	63.4	49	40	D	F	6165	TGGTCATACAGTAATGAGCA	C	6412.2	TGGTCATACAGTAATGAGCAC	G	6452.2	TGGTCATACAGTAATGAGCAG
G6PD_X_b36_153426313	W1187	iPLEX	G6PD_X_b36_153426313	ACGTTGGATGAGCAGGAGCTCTATCAAAAC	ACGTTGGATGTGAACAAAGAACCACTGAGC	102	97.1	63.4	46	35	D	R	6371.2	gACTAGTTAGTTCTTCCACAT	G	6618.3	gACTAGTTAGTTCTTCCACATC	A	6698.3	gACTAGTTAGTTCTTCCACATT
rs60589782	W1187	iPLEX	rs60589782	ACGTTGGATGCCACGCCCAGCTAATTTTTG	ACGTTGGATGGTCAAGAGATCAAGACCATC	98	98.5	63.4	46	47.1	dg	F	6502.2	gcgcGAGATGGGGTTTCATCA	C	6749.4	gcgcGAGATGGGGTTTCATCAC	T	6829.3	gcgcGAGATGGGGTTTCATCAT
rs28579420	W1187	iPLEX	rs28579420	ACGTTGGATGTGCTCTCCCAGGATTGATTG	ACGTTGGATGTTACAGCTGTGATGGTTTAG	113	93.7	63.4	47	40	d	R	6644.3	taTCTCCATTATCTCAAGTAGC	T	6915.6	taTCTCCATTATCTCAAGTAGCA	C	6931.6	taTCTCCATTATCTCAAGTAGCG
G6PD_X_b36_153412620	W1187	iPLEX	G6PD_X_b36_153412620	ACGTTGGATGCTCAAGCTGGTCTCACAATG	ACGTTGGATGGACCATGTTTGGTGTCAGAG	97	100	63.4	49	40.9	D	F	6718.4	CTGGTCTCACAATGACAATATG	C	6965.6	CTGGTCTCACAATGACAATATGC	A	6989.6	CTGGTCTCACAATGACAATATGA
rs12861291	W1187	iPLEX	rs12861291	ACGTTGGATGTTTCAGAACAGCCCCTTCTC	ACGTTGGATGCCAACATGAAGGATGGGAAC	111	99.5	63.4	47	50	D	R	6948.5	gtccgGGTTTCCTCCCTATCTTG	G	7195.7	gtccgGGTTTCCTCCCTATCTTGC	C	7235.7	gtccgGGTTTCCTCCCTATCTTGG
rs4898389	W1187	iPLEX	rs4898389	ACGTTGGATGCCTCCCTCAACTTAGATACC	ACGTTGGATGATGTTCCCAGAACTCAGTCC	101	100	63.4	46	34.8	D	R	7015.6	CTTAGATACCAATTAGAGATCAC	G	7262.8	CTTAGATACCAATTAGAGATCACC	A	7342.7	CTTAGATACCAATTAGAGATCACT
rs4256746	W1187	iPLEX	rs4256746	ACGTTGGATGAACTCGACATTTCTACTTGG	ACGTTGGATGTGGGTAGATCTGGGTTTTGG	110	94	63.4	46	38.1	d	R	7060.6	ggTCTACTTGGTTATCTAGTAGC	G	7307.8	ggTCTACTTGGTTATCTAGTAGCC	A	7387.7	ggTCTACTTGGTTATCTAGTAGCT
G6PD_X_b36_153413678	W1188	iPLEX	G6PD_X_b36_153413678	ACGTTGGATGACCGGCCTCCCAAGCCATA	ACGTTGGATGTCAATCTGGTGCAGCAGTGG	107	86.9	64.6	51	66.7	d	R	4538	TCAGCGACGAGCTCC	C	4825.2	TCAGCGACGAGCTCCG	A	4865.1	TCAGCGACGAGCTCCT
G6PD_X_b36_153413788	W1188	iPLEX	G6PD_X_b36_153413788	ACGTTGGATGATAGCCCACAGGTATGCAGG	ACGTTGGATGTCATCCTGGACGTCTTCTGC	106	97	64.6	60	86.7	Dsg	F	4675	GGGGCCGGCAGCTGG	A	4946.2	GGGGCCGGCAGCTGGA	G	4962.2	GGGGCCGGCAGCTGGG
G6PD_X_b36_153415828	W1188	iPLEX	G6PD_X_b36_153415828	ACGTTGGATGATCATCGTGGAGAAGCCCTT	ACGTTGGATGAGATCTGGTCCTCACGGAAC	111	95.6	64.6	46	50	d	R	4761.1	CTGTCCAACCACATCT	G	5008.3	CTGTCCAACCACATCTC	A	5088.2	CTGTCCAACCACATCTT
G6PD_X_b36_153416165	W1188	iPLEX	G6PD_X_b36_153416165	ACGTTGGATGAATGAGGAAGCCATGGCTTG	ACGTTGGATGTTCCCCTCCTGCCTCATGCT	120	86.4	64.6	49	66.7	s	R	4780.1	aGCCACTCAGACCCAC	G	5027.3	aGCCACTCAGACCCACC	C	5067.3	aGCCACTCAGACCCACG
G6PD_X_b36_153414937	W1188	iPLEX	G6PD_X_b36_153414937	ACGTTGGATGATGCACACCCCAGCTCAGT	ACGTTGGATGATGACGTCCGTGATGAGAAG	120	92	64.6	48	60	D	F	4882.2	gGTGCCTCGTCACAGA	C	5129.4	gGTGCCTCGTCACAGAC	T	5209.3	gGTGCCTCGTCACAGAT
rs762516	W1188	iPLEX	rs762516	ACGTTGGATGTTCAGTAGAACCAAGGGACG	ACGTTGGATGTGTAAGCACTTGAGGTCACG	91	99.7	64.6	46	50		F	4988.3	AGGGACGACAGAAGTA	C	5235.5	AGGGACGACAGAAGTAC	T	5315.4	AGGGACGACAGAAGTAT
rs5986875	W1188	iPLEX	rs5986875	ACGTTGGATGAGAACTCAGACAAGGGTGAC	ACGTTGGATGCTGTTGGCAAATCTGCAGGG	119	97.1	64.6	48	56.3	ds	R	5106.3	cAGGTCAGTTCCTCCAC	G	5353.5	cAGGTCAGTTCCTCCACC	A	5433.4	cAGGTCAGTTCCTCCACT
G6PD_X_b36_153411188	W1188	iPLEX	G6PD_X_b36_153411188	ACGTTGGATGCAGGACAATCGCTTGAACCC	ACGTTGGATGCAGAGCTGAAGGGACAGTTG	101	97.1	64.6	46	56.3	D	R	5164.4	cGAAGACCATCCACTGG	G	5411.6	cGAAGACCATCCACTGGC	A	5491.5	cGAAGACCATCCACTGGT
G6PD_X_b36_153416473	W1188	iPLEX	G6PD_X_b36_153416473	ACGTTGGATGACCACTCTATGAGCGTGTCC	ACGTTGGATGAACGCTGCCACCTTGTGGTC	110	92.6	64.6	49	60	Ds	R	5186.4	gtATCTGGGCAGCATCC	T	5457.6	gtATCTGGGCAGCATCCA	C	5473.6	gtATCTGGGCAGCATCCG
G6PD_X_b36_153423083	W1188	iPLEX	G6PD_X_b36_153423083	ACGTTGGATGAAAGCAGTTGGGAGCTTCTC	ACGTTGGATGTTGTGTCCTTGGGCAGATCC	105	98.5	64.6	46	52.9		F	5296.5	tCTTCTCATCTTCCCCAC	A	5567.7	tCTTCTCATCTTCCCCACA	G	5583.7	tCTTCTCATCTTCCCCACG
rs6643680	W1188	iPLEX	rs6643680	ACGTTGGATGTGGCATCTAGCAGGTACAGG	ACGTTGGATGTCAGTGCCATCGGCACCTG	109	89	64.6	50	58.8	D	R	5333.5	cGCTCCACACCCTACAAC	T	5604.7	cGCTCCACACCCTACAACA	C	5620.7	cGCTCCACACCCTACAACG
G6PD_X_b36_153429253	W1188	iPLEX	G6PD_X_b36_153429253	ACGTTGGATGTTCAGGCTCCCCCCTCTTTT	ACGTTGGATGAGTAACCTGGGTCCTGAATC	115	95.2	64.6	51	58.8	D	F	5392.5	aCCCCCTCTTTTTTGGGC	C	5639.7	aCCCCCTCTTTTTTGGGCC	T	5719.6	aCCCCCTCTTTTTTGGGCT
G6PD_X_b36_153414077	W1188	iPLEX	G6PD_X_b36_153414077	ACGTTGGATGATCTTCCACCAGCAGTGCAA	ACGTTGGATGCATCATCTTGGTGTACACGG	98	97.5	64.6	56	66.7	D	R	5531.6	CTGGTGATCCGCGTGCAG	G	5778.8	CTGGTGATCCGCGTGCAGC	C	5818.8	CTGGTGATCCGCGTGCAGG
hG6PD_plus202	W1188	iPLEX	hG6PD_plus202_E	ACGTTGGATGATGGCCTTCTGCCCGAAAAC	ACGTTGGATGTCACTCTGTTTGCGGATGTC	102	98.5	64.6	52	52.6	D	R	5701.7	GCCCGAAAACACCTTCATC	T	5972.9	GCCCGAAAACACCTTCATCA	C	5988.9	GCCCGAAAACACCTTCATCG
rs61042368	W1188	iPLEX	rs61042368	ACGTTGGATGTCCTAGAGCTTCACTGCTCG	ACGTTGGATGGCCAGAATTCAGTCTGCTTC	99	98.6	64.6	46	53.3	d	R	5701.7	ccaaTCGCCTCCACTAGAA	G	5948.9	ccaaTCGCCTCCACTAGAAC	A	6028.8	ccaaTCGCCTCCACTAGAAT
G6PD_X_b36_153412734	W1188	iPLEX	G6PD_X_b36_153412734	ACGTTGGATGAAGTGAGGAGGCTCCTCAGT	ACGTTGGATGTCATTTGCTTCCCTGAGGAC	110	95.7	64.6	48	60	D	F	5800.8	cgcaACAGAGGAAGCACCC	A	6072	cgcaACAGAGGAAGCACCCA	G	6088	cgcaACAGAGGAAGCACCCG
rs5986877	W1188	iPLEX	rs5986877	ACGTTGGATGACCTTGCTCTTCCCCCTTC	ACGTTGGATGGCAGAAGAGCTCTGCTTTAG	96	95.9	64.6	48	60	d	R	5918.8	cccccCTCAGGCACCCATCT	G	6166	cccccCTCAGGCACCCATCTC	C	6206.1	cccccCTCAGGCACCCATCTG
rs12837628	W1188	iPLEX	rs12837628	ACGTTGGATGTTTGAGACCCAGTCTCACTC	ACGTTGGATGAGGAGAATCGCTCAAACCTG	117	98.9	64.6	50	62.5	D	F	6044.9	gtccCGATCTTGGCTCACCG	C	6292.1	gtccCGATCTTGGCTCACCGC	G	6332.1	gtccCGATCTTGGCTCACCGG
G6PD_X_b36_153416596	W1188	iPLEX	G6PD_X_b36_153416596	ACGTTGGATGAACGGCAAGCCTTACATCTG	ACGTTGGATGCTCTTCTACCTGGCCTTGC	112	95.4	64.6	52	58.8	d	F	6118	cagCTGGCTCATGCAGGACT	C	6365.2	cagCTGGCTCATGCAGGACTC	T	6445.1	cagCTGGCTCATGCAGGACTT
rs1050831	W1188	iPLEX	rs1050831	ACGTTGGATGCCGTGCCACCCGTAGGCAG	ACGTTGGATGTTGCGGATTTAATGGCAGGG	115	72.8	64.6	57	68.8	s	R	6136	aagaAGCAGCTGGGACCCCT	G	6383.2	aagaAGCAGCTGGGACCCCTC	A	6463.1	aagaAGCAGCTGGGACCCCTT
rs6655250	W1188	iPLEX	rs6655250	ACGTTGGATGGAGAGGTTCAATGGACTCAC	ACGTTGGATGATGCCTTTGCTCATCCTTCG	102	100	64.6	47	50	D	R	6311.1	cccacTGGACTCACAGTTCCA	G	6558.3	cccacTGGACTCACAGTTCCAC	A	6638.2	cccacTGGACTCACAGTTCCAT
rs12837311	W1188	iPLEX	rs12837311	ACGTTGGATGCGTAAATAGTTGTTTCACTG	ACGTTGGATGACAGAGTTGGACTGTGTCTC	94	87.6	64.6	45	41.2	D	R	6409.2	ggatTTGTTTCACTGTCTTGC	C	6696.4	ggatTTGTTTCACTGTCTTGCG	A	6736.3	ggatTTGTTTCACTGTCTTGCT
rs5945202	W1188	iPLEX	rs5945202	ACGTTGGATGCCCAAACATCTCAGTGGAG	ACGTTGGATGTCTGAGATCGGAGAAGAACC	114	97.7	64.6	46	35	D	R	6520.3	tAGTAAAGAATAACAAGGCAG	G	6767.5	tAGTAAAGAATAACAAGGCAGC	A	6847.4	tAGTAAAGAATAACAAGGCAGT
rs7879049	W1188	iPLEX	rs7879049	ACGTTGGATGTTTACCACAGCCCATGGCAC	ACGTTGGATGGCTCAGGGGAGTGAGAAAAG	95	92.8	64.6	49	52.9	Dsg	R	6809.4	aggggCATCCTGGCATAGAGCA	G	7056.6	aggggCATCCTGGCATAGAGCAC	A	7136.5	aggggCATCCTGGCATAGAGCAT
rs11797720	W1188	iPLEX	rs11797720	ACGTTGGATGTTCGAAAGCCTACCAAGGAG	ACGTTGGATGTGTCTTTCCTATGAGTGCAG	111	98.1	64.6	46	38.9		R	7031.6	aaccaAATTGTCCAGCTTGTAGA	T	7302.8	aaccaAATTGTCCAGCTTGTAGAA	C	7318.8	aaccaAATTGTCCAGCTTGTAGAG
rs35228794	W1188	iPLEX	rs35228794	ACGTTGGATGGGAAGGTTTTTGTTTTTGGG	ACGTTGGATGTCTGGTGCATTGCAGATTGG	96	94.3	64.6	50	30.4	D	F	7105.6	TTGTTTTTGGGTAATGATTGTCA	A	7376.8	TTGTTTTTGGGTAATGATTGTCAA	G	7392.8	TTGTTTTTGGGTAATGATTGTCAG
G6PD_X_b36_153424456	W1189	iPLEX	G6PD_X_b36_153424456	ACGTTGGATGCAGCAGATTCTAGGATCACG	ACGTTGGATGTTCTTCCACGCCTGATGCCT	100	96.1	66.1	50	66.7	DS	F	4408.9	ACCCTGCCTACCTCC	C	4656.1	ACCCTGCCTACCTCCC	T	4736	ACCCTGCCTACCTCCT
G6PD_X_b36_153416019	W1189	iPLEX	G6PD_X_b36_153416019	ACGTTGGATGTGCATCATTCAGACGCCCTC	ACGTTGGATGATCTGGGAACACAAGGCACG	106	97	66.1	49	66.7	D	F	4457.9	CCAGAACCTCCTCGC	C	4705.1	CCAGAACCTCCTCGCC	T	4785	CCAGAACCTCCTCGCT
G6PD_X_b36_153416108	W1189	iPLEX	G6PD_X_b36_153416108	ACGTTGGATGACCCAGCATGAGGCAGGAG	ACGTTGGATGAACACCTTCCGGGAAGCCTT	113	86.5	66.1	50	60	Ds	R	4562	GCATGCCAGCAATGC	G	4809.2	GCATGCCAGCAATGCC	A	4889.1	GCATGCCAGCAATGCT
G6PD_X_b36_153416670	W1189	iPLEX	G6PD_X_b36_153416670	ACGTTGGATGAGGTAGAAGAGGCGGTTGG	ACGTTGGATGATGATGCAGCCTCCTACCAG	102	94.6	66.1	50	66.7	D	F	4600	CGGTTGGCCTGTGAC	C	4847.2	CGGTTGGCCTGTGACC	A	4871.2	CGGTTGGCCTGTGACA
G6PD_X_b36_153412861	W1189	iPLEX	G6PD_X_b36_153412861	ACGTTGGATGTTAATGGCAGGGCATTGAGG	ACGTTGGATGCCGTGCCACCCGTAGGCAG	107	73.3	66.1	57	64.7	D	F	5113.3	TCCCAGCTGCTGCGTCT	A	5384.5	TCCCAGCTGCTGCGTCTA	G	5400.5	TCCCAGCTGCTGCGTCTG
G6PD_X_b36_153414709	W1189	iPLEX	G6PD_X_b36_153414709	ACGTTGGATGTGCTTGGCTCTGCTCACCCT	ACGTTGGATGTCAGAATAGACTCGAGATGG	114	89.9	66.1	50	66.7	D	F	5115.3	ttGACCCTCCAGGACCA	C	5362.5	ttGACCCTCCAGGACCAC	T	5442.4	ttGACCCTCCAGGACCAT
rs12389569	W1189	iPLEX	rs12389569	ACGTTGGATGTTGGAGCTCACAGGAGCACT	ACGTTGGATGGTGAGTCACCCTATGGAATG	96	96	66.1	53	64.7	d	R	5211.4	GAGCACTGAGGCCCTTG	G	5458.6	GAGCACTGAGGCCCTTGC	A	5538.5	GAGCACTGAGGCCCTTGT
rs1894260	W1189	iPLEX	rs1894260	ACGTTGGATGATCTCTCAAGGTTTCACCCC	ACGTTGGATGAAAGCTCTGAGTACACTGCG	113	99.3	66.1	50	52.9	D	R	5339.5	TGGGTAGGAGCTGGAAA	T	5610.7	TGGGTAGGAGCTGGAAAA	C	5626.7	TGGGTAGGAGCTGGAAAG
G6PD_X_b36_153415894	W1189	iPLEX	G6PD_X_b36_153415894	ACGTTGGATGTCCCGAAGGGCTTCTCCAC	ACGTTGGATGTGATCCTCACTCCCCGAAGA	117	82.3	66.1	50	55.6	D	F	5490.6	GGCTTCTCCACGATGATG	C	5737.8	GGCTTCTCCACGATGATGC	T	5817.7	GGCTTCTCCACGATGATGT
rs56191948	W1189	iPLEX	rs56191948	ACGTTGGATGAGTAACCTGGGTCCTGAATC	ACGTTGGATGAGGCTCCCCCCTCTTTTTTG	112	98	66.1	56	73.3	D	R	5661.7	ccccCCCGCCTTGGCCAGT	T	5932.9	ccccCCCGCCTTGGCCAGTA	C	5948.9	ccccCCCGCCTTGGCCAGTG
rs6643679	W1189	iPLEX	rs6643679	ACGTTGGATGAAGGCTGGAGCCCTGTTTTC	ACGTTGGATGTTGTGGCTGAATTCTTTGGC	80	95.6	66.1	55	52.6		R	5665.7	AGCCCTGTTTTCACCCCTT	G	5912.9	AGCCCTGTTTTCACCCCTTC	A	5992.8	AGCCCTGTTTTCACCCCTTT
G6PD_X_b36_153427408	W1189	iPLEX	G6PD_X_b36_153427408	ACGTTGGATGTCATCATCATGGGTGCATCG	ACGTTGGATGTTGGAAAAGCTGAGGCATGG	107	99.8	66.1	49	47.4	D	R	5765.8	CCCAATCTTAAAAGCCAGG	T	6037	CCCAATCTTAAAAGCCAGGA	C	6053	CCCAATCTTAAAAGCCAGGG
G6PD_X_b36_153415121	W1189	iPLEX	G6PD_X_b36_153415121	ACGTTGGATGTCCCCATGCCCTTGAACCAG	ACGTTGGATGAGGTGGTTCTGCATCACGTC	110	92.6	66.1	54	57.9	D	R	5797.8	GCCCTTGAACCAGGTGAAC	T	6069	GCCCTTGAACCAGGTGAACA	C	6085	GCCCTTGAACCAGGTGAACG
rs7881468	W1189	iPLEX	rs7881468	ACGTTGGATGAAGTGTTGGGATTACAGGCG	ACGTTGGATGCAGGATTTGGTTTGCTGATG	110	98.2	66.1	53	73.3	d	F	5894.8	ggtgCAGGCGTGAGCCACG	A	6166	ggtgCAGGCGTGAGCCACGA	G	6182	ggtgCAGGCGTGAGCCACGG
rs28470352	W1189	iPLEX	rs28470352	ACGTTGGATGGGTGAGAAAATGTTGGTGGC	ACGTTGGATGAAGAGCGAGACTCCGACTTA	116	97.7	66.1	47	41.2	DS	F	6018.9	ccgTTGTTTGCACTTCACCA	A	6290.1	ccgTTGTTTGCACTTCACCAA	T	6346	ccgTTGTTTGCACTTCACCAT
rs2004651	W1189	iPLEX	rs2004651	ACGTTGGATGGACATGGGAAATAGGGAAGG	ACGTTGGATGTGGGTATCCAAACAGGAAGC	110	99.6	66.1	46	40	D	R	6263.1	GAAATAGGGAAGGTGATAAC	G	6510.3	GAAATAGGGAAGGTGATAACC	T	6534.3	GAAATAGGGAAGGTGATAACA
rs34193178	W1189	iPLEX	rs34193178	ACGTTGGATGATGCCCAGTTCTGCCTTGCT	ACGTTGGATGCACTTTTGCAGCCGTCGTC	109	91.9	66.1	48	47.1	D	F	6310.1	ctctAAGGCATCACCTACCAT	C	6557.3	ctctAAGGCATCACCTACCATC	G	6597.3	ctctAAGGCATCACCTACCATG
rs5986997	W1189	iPLEX	rs5986997	ACGTTGGATGATTCTACTGGGATGGGACAC	ACGTTGGATGTGCACAGGAATATCTAGCCC	95	99.9	66.1	47	36.8	D	R	6377.2	aaTGGCTTGTCTTCTACATTT	T	6648.4	aaTGGCTTGTCTTCTACATTTA	C	6664.4	aaTGGCTTGTCTTCTACATTTG
rs7053878	W1189	iPLEX	rs7053878	ACGTTGGATGGCAACAGAGGAGATGCTGTC	ACGTTGGATGACGGTCTGCTCCATAAGAGG	99	97.1	66.1	46	30		F	6446.2	tAGATGCTGTCTCAAAAAAAA	A	6717.5	tAGATGCTGTCTCAAAAAAAAA	T	6773.3	tAGATGCTGTCTCAAAAAAAAT
rs743544	W1189	iPLEX	rs743544	ACGTTGGATGGGGTTGTCTGTTTCTATTCG	ACGTTGGATGGCTAACCCAAAGAAAAGATG	91	92.7	66.1	47	31.8	D	R	6619.3	GTCTTTTTCAAACACCAATTTC	G	6866.5	GTCTTTTTCAAACACCAATTTCC	A	6946.4	GTCTTTTTCAAACACCAATTTCT
rs2515910	W1189	iPLEX	rs2515910	ACGTTGGATGGACAGCTTTTGAAACGAGGG	ACGTTGGATGCGGAGGCAGTGAAATGACAA	91	97.2	66.1	55	70.6	D	R	6752.4	ccgatGGCCCAGGGTCCTTAGG	G	6999.6	ccgatGGCCCAGGGTCCTTAGGC	A	7079.5	ccgatGGCCCAGGGTCCTTAGGT
rs3205649	W1189	iPLEX	rs3205649	ACGTTGGATGCTGCTCTCCTACTGCATTCC	ACGTTGGATGACACCAAGGACCTGCACTG	114	93.8	66.1	46	27.3		F	6808.5	TAATCAATAAAAACTGAGGGAA	C	7055.7	TAATCAATAAAAACTGAGGGAAC	T	7135.6	TAATCAATAAAAACTGAGGGAAT
rs11156578	W1189	iPLEX	rs11156578	ACGTTGGATGCAACACCCGTAAAGGGTCTG	ACGTTGGATGTGGCCTTCCTCTATCTCAAC	98	98.5	66.1	51	50	d	F	6828.4	cggtTCTGTGCTGAGGTGGATT	A	7099.6	cggtTCTGTGCTGAGGTGGATTA	G	7115.6	cggtTCTGTGCTGAGGTGGATTG
rs60030796	W1189	iPLEX	rs60030796	ACGTTGGATGCGATTAACTGGACATTGTGC	ACGTTGGATGGAGTGGTCTTGGCCAAAAAG	100	96.3	66.1	46	25	D	R	7465.9	GGAAAATATAATGAATTCGAGAAA	G	7713.1	GGAAAATATAATGAATTCGAGAAAC	A	7793	GGAAAATATAATGAATTCGAGAAAT

## Sheet: Supplementary file 2D
sequence_code	multiplex_code	TERM	SNP_ID	2nd-PCRP	1st-PCRP	amp_len	up_conf	mp_conf	TM(NN)	PcGC	pwarn	uep_dir	uep_mass	UEP_SEQ	ext1_call	ext1_mass	ext1_seq	ext2_call	ext2_mass	ext2_seq	ext3_call	ext3_mass	ext3_seq	ext4_call	ext4_mass	ext4_seq	first_pause
rs5986990	W1197	iPLEX	rs5986990_A	ACGTTGGATGAAGTCACCACCTCTGAGCAC	ACGTTGGATGCTGGGACATGACAACTTGGG	102	97.1	69	50	60	d	R	4593	ACCTGGACTGGCAGT	G	4840.2	ACCTGGACTGGCAGTC	A	4920.1	ACCTGGACTGGCAGTT
G6PD_X_b36_153416679	W1197	iPLEX	G6PD_X_b36_153416679	ACGTTGGATGAGGTAGAAGAGGCGGTTGG	ACGTTGGATGATGATGCAGCCTCCTACCAG	102	94.6	64.1	51	66.7	D	F	4609	TGTGACCCCAGGTGG	A	4880.2	TGTGACCCCAGGTGGA	G	4896.2	TGTGACCCCAGGTGGG
rs2071429	W1197	iPLEX	rs2071429_A	ACGTTGGATGTTTGCCCTCCCTCCCTGTGT	ACGTTGGATGGCAGCAGTGGGGTGAAAATA	120	88.2	69	46	60	g	R	4731.1	cCCTCCCAAGCCATAC	G	4978.3	cCCTCCCAAGCCATACC	A	5058.2	cCCTCCCAAGCCATACT
G6PD_X_b36_153415014	W1197	iPLEX	G6PD_X_b36_153415014_A	ACGTTGGATGAGAACCACCTACTGCAGATG	ACGTTGGATGTTCTCATCACGGACGTCATC	102	100	69	52	73.3	D	R	4812.1	cGAGAAGCCCGCCTCC	T	5083.3	cGAGAAGCCCGCCTCCA	A	5139.2	cGAGAAGCCCGCCTCCT
G6PD_X_b36_153413799	W1197	iPLEX	G6PD_X_b36_153413799_B	ACGTTGGATGTCATCCTGGACGTCTTCTGC	ACGTTGGATGATAGCCCACAGGTATGCAGG	106	97	69	48	56.3	d	R	4857.2	CCAGATGCACTTCGTG	G	5104.4	CCAGATGCACTTCGTGC	A	5184.3	CCAGATGCACTTCGTGT
rs2230037	W1197	iPLEX	rs2230037_A	ACGTTGGATGCATCAGCAAGACACTCTCTC	ACGTTGGATGCAGAAGACGTCCAGGATGAG	98	98.5	69	51	66.7		R	5122.3	tgGCTCCCTGACGCCTA	G	5369.5	tgGCTCCCTGACGCCTAC	A	5449.4	tgGCTCCCTGACGCCTAT
G6PD_X_b36_153412566	W1197	iPLEX	G6PD_X_b36_153412566_A	ACGTTGGATGATTGTGAGACCAGCTTGAGG	ACGTTGGATGTTGCTGGAAGTCATCTTGGG	111	99.5	69	49	66.7	Dg	R	5218.4	ggGTGGGGTCACCTTCC	T	5489.6	ggGTGGGGTCACCTTCCA	C	5505.6	ggGTGGGGTCACCTTCCG
G6PD_X_b36_153415799	W1197	iPLEX	G6PD_X_b36_153415799_A	ACGTTGGATGCGGCTGTCCAACCACATCT	ACGTTGGATGATCTCCTTGCCCAGGTAGTG	97	92.1	69	45	52.9		R	5219.4	GTGAGGACCAGATCTAC	G	5466.6	GTGAGGACCAGATCTACC	A	5546.5	GTGAGGACCAGATCTACT
G6PD_X_b36_153414378	W1197	iPLEX	G6PD_X_b36_153414378_A	ACGTTGGATGTGCCCCGCGGGTCCACCAC	ACGTTGGATGTCGAAGGCATCACCTACCAT	106	61.4	69	50	60	D	R	5402.5	cccTTTGCAGCCGTCGTC	G	5649.7	cccTTTGCAGCCGTCGTCC	A	5729.6	cccTTTGCAGCCGTCGTCT
hG6PD_680	W1197	iPLEX	hG6PD_680_B	ACGTTGGATGTTTGCCAACAGGATCTTCGG	ACGTTGGATGCCTTGAAGGTGAGGATAACG	90	99.6	69	57	66.7	ds	F	5420.5	TCGGCCCCATCTGGAACC	G	5707.7	TCGGCCCCATCTGGAACCG	T	5747.6	TCGGCCCCATCTGGAACCT
rs2472393	W1197	iPLEX	rs2472393_A	ACGTTGGATGAGCACCTGGAACAGCTCCG	ACGTTGGATGTAGGATCACGTGCCCTCAAG	119	88	69	54	73.3	dS	R	5670.7	ccgcACAGCTCCGGCTCCC	T	5941.9	ccgcACAGCTCCGGCTCCCA	C	5957.9	ccgcACAGCTCCGGCTCCCG
rs2515905	W1197	iPLEX	rs2515905_A	ACGTTGGATGAGTGTCTGAGCTATCAGACC	ACGTTGGATGGGTGATGCTATCACTGAATC	110	98.2	69	56	63.2	DS	R	5671.7	CCCCTACACAGCCAAGCAC	G	5918.9	CCCCTACACAGCCAAGCACC	A	5998.8	CCCCTACACAGCCAAGCACT
rs762515	W1197	iPLEX	rs762515_A	ACGTTGGATGCTACTCAGGATCACTACTGG	ACGTTGGATGTGGCACAGGCTTGAATCTCG	105	98.5	69	50	45	d	F	6074	CATGTCTGTCTTGCCTGATA	C	6321.1	CATGTCTGTCTTGCCTGATAC	T	6401.1	CATGTCTGTCTTGCCTGATAT
rs2515904	W1197	iPLEX	rs2515904_A	ACGTTGGATGTGGGAGGGCGTCTGAATGAT	ACGTTGGATGAGCTGCGTTACCCCCTTGA	91	59.7	69	47	47.1	D	R	6197	ggaGTCTGAATGATGCAGCT	G	6444.2	ggaGTCTGAATGATGCAGCTC	C	6484.2	ggaGTCTGAATGATGCAGCTG
rs1734792	W1197	iPLEX	rs1734792	ACGTTGGATGTTAGTCCATATGTCAGTTC	ACGTTGGATGTAAGGAGGGAAAGTGGAAGG	98	87.9	69	53	47.6	D	R	6283.1	TCCATATGTCAGTTCCCCTCT	C	6570.3	TCCATATGTCAGTTCCCCTCTG	A	6610.2	TCCATATGTCAGTTCCCCTCTT
G6PD_X_b36_153426720	W1197	iPLEX	G6PD_X_b36_153426720_A	ACGTTGGATGCGAAATTGAGGCAAAGAGAC	ACGTTGGATGCTCTGCCTCTTCACTAACAC	104	98.5	69	51	47.4	Dg	F	6544.3	ggGGCAAAGAGACAGTGTTCA	A	6815.5	ggGGCAAAGAGACAGTGTTCAA	G	6831.5	ggGGCAAAGAGACAGTGTTCAG
G6PD_X_b36_153428979	W1197	iPLEX	G6PD_X_b36_153428979_A	ACGTTGGATGTCAGACTTCTCTCCGGAGC	ACGTTGGATGAAGTAAAAACACAAGCCCCG	116	89.5	69	56	70.6	D	F	6632.3	acccaGCCGGCTTCCCGAGTTC	C	6879.5	acccaGCCGGCTTCCCGAGTTCC	T	6959.4	acccaGCCGGCTTCCCGAGTTCT
G6PD_X_b36_153427466	W1197	iPLEX	G6PD_X_b36_153427466_A	ACGTTGGATGCTGGGAGATACTCACCGATG	ACGTTGGATGTTTTCCAGGGCGATGCCTTC	97	97.1	69	51	45	Ds	F	6783.4	gtGATGCACCCATGATGATGAA	C	7030.6	gtGATGCACCCATGATGATGAAC	T	7110.5	gtGATGCACCCATGATGATGAAT
G6PD_X_b36_153429686	W1197	iPLEX	G6PD_X_b36_153429686_A	ACGTTGGATGTGCGTAAAAGCCAATCTCCC	ACGTTGGATGAGCACAGTTGGAGAGGAAGG	101	98.6	69	53	61.1		R	6920.5	tccctGCCTACAAGGCCCTGTAC	G	7167.7	tccctGCCTACAAGGCCCTGTACC	T	7191.7	tccctGCCTACAAGGCCCTGTACA
G6PD_X_b36_153426354	W1197	iPLEX	G6PD_X_b36_153426354_A	ACGTTGGATGCCTGGATGCACTCAAGAATC	ACGTTGGATGACTAGTTTTGATAGAGCTCC	118	93.1	69	52	37.5	d	R	7237.7	TTGCCATTAACTTACCTTGTAACC	C	7524.9	TTGCCATTAACTTACCTTGTAACCG	A	7564.8	TTGCCATTAACTTACCTTGTAACCT
G6PD_X_b36_153426256	W1197	iPLEX	G6PD_X_b36_153426256_A	ACGTTGGATGCTGAGCTCAGTGGTTCTTTG	ACGTTGGATGCAAAGGTGTCAAGGAGTAGG	96	99.9	69	50	38.1	D	R	7360.8	ggaTTTGTTCACATAGAACAACGC	T	7632	ggaTTTGTTCACATAGAACAACGCA	C	7648	ggaTTTGTTCACATAGAACAACGCG
G6PD_X_b36_153424232	W1197	iPLEX	G6PD_X_b36_153424232_A	ACGTTGGATGTTCAGGCTGACGTGTGTTTC	ACGTTGGATGCTCTTTGTGGGATCTATGCG	100	100	69	46	42.1		R	7407.8	gatgcCGTGTGTTTCAGAAGATAC	T	7679	gatgcCGTGTGTTTCAGAAGATACA	C	7695	gatgcCGTGTGTTTCAGAAGATACG
G6PD_X_b36_153414709	W1197	iPLEX	G6PD_X_b36_153414709_A	ACGTTGGATGTGCTTGGCTCTGCTCACCCT	ACGTTGGATGTCAGAATAGACTCGAGATGG	114	89.9	69	61	66.7	D	F	7596.9	gctaCCTGAGGACCCTCCAGGACCA	C	7844.1	gctaCCTGAGGACCCTCCAGGACCAC	T	7924	gctaCCTGAGGACCCTCCAGGACCAT
rs60030796	W1197	iPLEX	rs60030796_A	ACGTTGGATGCGATTAACTGGACATTGTGC	ACGTTGGATGGAGTGGTCTTGGCCAAAAAG	100	96.3	69	47	24		R	7779.1	AGGAAAATATAATGAATTCGAGAAA	G	8026.3	AGGAAAATATAATGAATTCGAGAAAC	A	8106.2	AGGAAAATATAATGAATTCGAGAAAT
rs766420	W1197	iPLEX	rs766420	ACGTTGGATGGGCTTTTGTGAGAATACCAG	ACGTTGGATGGAATAATCTGTTAGGTTCAG	102	78.4	69	57	40.7		R	8133.3	TCATGTTCCCTTTTATTCCTGGCCTTA	G	8380.5	TCATGTTCCCTTTTATTCCTGGCCTTAC	C	8420.5	TCATGTTCCCTTTTATTCCTGGCCTTAG
rs28470352	W1197	iPLEX	rs28470352_A	ACGTTGGATGGGTGAGAAAATGTTGGTGGC	ACGTTGGATGCAAAAGAGCGAGACTCCGAC	119	97.1	69	57	35.7	d	F	8461.5	ATTCTTTGCTTTTGTTTGCACTTCACCA	A	8732.7	ATTCTTTGCTTTTGTTTGCACTTCACCAA	T	8788.6	ATTCTTTGCTTTTGTTTGCACTTCACCAT
rs763737	W1198	iPLEX	rs763737	ACGTTGGATGACCTTAGCAACCCTGGTTTC	ACGTTGGATGGTTCCCAGCCTTCAGGAATG	118	97.3	71.7	50	60	D	R	4454.9	TTGCTCTCCAGCCCT	G	4702.1	TTGCTCTCCAGCCCTC	A	4782	TTGCTCTCCAGCCCTT
G6PD_X_b36_153417417	W1198	iPLEX	G6PD_X_b36_153417417_A	ACGTTGGATGTGTTCCGGGATGGCCTTCTG	ACGTTGGATGTCACTCTGTTTGCGGATGTC	111	93.9	71.7	48	60	d	R	4490.9	CTGCCCGAAAACACC	T	4762.2	CTGCCCGAAAACACCA	A	4818	CTGCCCGAAAACACCT
rs2230036	W1198	iPLEX	rs2230036_A	ACGTTGGATGTGCACTGCTGGTGGAAGATG	ACGTTGGATGAAGGCCCTGAACGAGCGCAA	99	90.6	71.7	50	56.3	d	F	4875.2	CGGCCACATCATGGAA	C	5122.4	CGGCCACATCATGGAAC	T	5202.3	CGGCCACATCATGGAAT
hG6PD_542	W1198	iPLEX	hG6PD_542_B	ACGTTGGATGAGATCTGGTCCTCACGGAAC	ACGTTGGATGATCATCGTGGAGAAGCCCTT	111	95.6	71.7	53	68.8	d	R	4978.2	GTGGTTGGACAGCCGG	T	5249.4	GTGGTTGGACAGCCGGA	A	5305.3	GTGGTTGGACAGCCGGT
G6PD_X_b36_153412734	W1198	iPLEX	G6PD_X_b36_153412734_A	ACGTTGGATGTCATTTGCTTCCCTGAGGAC	ACGTTGGATGAAGTGAGGAGGCTCCTCAGT	110	95.7	71.7	52	64.7	d	R	5020.3	CCACTCCCCAAGTCACC	G	5267.5	CCACTCCCCAAGTCACCC	A	5347.4	CCACTCCCCAAGTCACCT
rs12389569	W1198	iPLEX	rs12389569_A	ACGTTGGATGTTGGAGCTCACAGGAGCACT	ACGTTGGATGGTGAGTCACCCTATGGAATG	96	96	71.7	50	66.7	d	R	5177.4	ttGCACTGAGGCCCTTG	G	5424.6	ttGCACTGAGGCCCTTGC	A	5504.5	ttGCACTGAGGCCCTTGT
G6PD_X_b36_153415904	W1198	iPLEX	G6PD_X_b36_153415904_A	ACGTTGGATGTGATCCTCACTCCCCGAAGA	ACGTTGGATGAGGGCTTCTCCACGATGATG	111	94.2	71.7	54	73.3	d	R	5180.4	taCGGGCTCCCAGCAGA	T	5451.6	taCGGGCTCCCAGCAGAA	C	5467.6	taCGGGCTCCCAGCAGAG
G6PD_X_b36_153413678	W1198	iPLEX	G6PD_X_b36_153413678_A	ACGTTGGATGACCGGCCTCCCAAGCCATA	ACGTTGGATGTCAATCTGGTGCAGCAGTGG	107	86.9	71.7	58	72.2	D	R	5405.5	CCCTCAGCGACGAGCTCC	C	5692.7	CCCTCAGCGACGAGCTCCG	A	5732.6	CCCTCAGCGACGAGCTCCT
G6PD_X_b36_153416656	W1198	iPLEX	G6PD_X_b36_153416656_A	ACGTTGGATGTTGGTGACGGCCTCGTAGAC	ACGTTGGATGAGCGCCTCAACAGCCACAT	120	86.9	71.7	54	61.1	D	F	5622.7	AGGCCAGGTAGAAGAGGC	A	5893.9	AGGCCAGGTAGAAGAGGCA	G	5909.9	AGGCCAGGTAGAAGAGGCG
G6PD_X_b36_153413455	W1198	iPLEX	G6PD_X_b36_153413455_A	ACGTTGGATGAGGCAGACGAGCTGATGAAG	ACGTTGGATGGTTCACCCACTTGTAGGTGC	82	95.9	71.7	48	44.4	D	R	5658.7	TGATGAAGAGAGTGGGTT	C	5945.9	TGATGAAGAGAGTGGGTTG	A	5985.8	TGATGAAGAGAGTGGGTTT
G6PD_X_b36_153414531	W1198	iPLEX	G6PD_X_b36_153414531_A	ACGTTGGATGAGGACCACATTGTTGGCCTG	ACGTTGGATGCATTCTCTCCCTTGGCTTTC	96	98.5	71.7	45	38.9	D	F	5771.8	cCTGAGATGCATTTCAACA	C	6019	cCTGAGATGCATTTCAACAC	T	6098.9	cCTGAGATGCATTTCAACAT
rs762516	W1198	iPLEX	rs762516_A	ACGTTGGATGTTCAGTAGAACCAAGGGACG	ACGTTGGATGTGTAAGCACTTGAGGTCACG	91	99.7	71.7	47	47.1	D	F	5927.9	aaAAGGGACGACAGAAGTA	C	6175.1	aaAAGGGACGACAGAAGTAC	T	6255	aaAAGGGACGACAGAAGTAT
rs915941	W1198	iPLEX	rs915941	ACGTTGGATGGTCTATGGTCATGACGTCTG	ACGTTGGATGGCTTATATAGGCGGTCTGTC	110	99.6	71.7	56	70.6	d	F	5965.9	cccGCGTCCACCCGTCTTCG	C	6213	cccGCGTCCACCCGTCTTCGC	A	6237.1	cccGCGTCCACCCGTCTTCGA
G6PD_X_b36_153412861	W1198	iPLEX	G6PD_X_b36_153412861_A	ACGTTGGATGTTAATGGCAGGGCATTGAGG	ACGTTGGATGCCGTGCCACCCGTAGGCAG	107	73.3	71.7	60	68.4	D	F	6060.9	cGGTCCCAGCTGCTGCGTCT	A	6332.1	cGGTCCCAGCTGCTGCGTCTA	G	6348.1	cGGTCCCAGCTGCTGCGTCTG
G6PD_X_b36_153426313	W1198	iPLEX	G6PD_X_b36_153426313_A	ACGTTGGATGTGAACAAAGAACCACTGAGC	ACGTTGGATGAGCAGGAGCTCTATCAAAAC	102	97.1	71.7	64	75	Dg	F	6153	GCCAGCACTGAGGGGCGCAC	A	6424.2	GCCAGCACTGAGGGGCGCACA	G	6440.2	GCCAGCACTGAGGGGCGCACG
rs4898389	W1198	iPLEX	rs4898389_A	ACGTTGGATGATGTTCCCAGAACTCAGTCC	ACGTTGGATGCCTCCCTCAACTTAGATACC	101	100	71.7	49	52.6		F	6310.1	ttCCCAGACCCTATCAGAATC	A	6581.3	ttCCCAGACCCTATCAGAATCA	G	6597.3	ttCCCAGACCCTATCAGAATCG
rs915942	W1198	iPLEX	rs915942	ACGTTGGATGACCGCAAGAGACGACAACTG	ACGTTGGATGCTATATAAGCCATGCGCAGG	100	98.6	71.7	52	50	D	R	6311.1	cccACGACAACTGCGCTTACT	G	6558.3	cccACGACAACTGCGCTTACTC	A	6638.2	cccACGACAACTGCGCTTACTT
rs5986997	W1198	iPLEX	rs5986997_A	ACGTTGGATGATTCTACTGGGATGGGACAC	ACGTTGGATGTGCACAGGAATATCTAGCCC	95	99.9	71.7	47	36.8		R	6393.2	gaTGGCTTGTCTTCTACATTT	T	6664.4	gaTGGCTTGTCTTCTACATTTA	C	6680.4	gaTGGCTTGTCTTCTACATTTG
G6PD_X_b36_153414758	W1198	iPLEX	G6PD_X_b36_153414758_A	ACGTTGGATGGGTCCATCTCGAGTCTATTC	ACGTTGGATGGACAGTCACTATGTGACCAG	99	100	71.7	57	55	D	F	6473.2	tAACAAGCTGAGGCCCAGAGA	A	6744.4	tAACAAGCTGAGGCCCAGAGAA	G	6760.4	tAACAAGCTGAGGCCCAGAGAG
G6PD_X_b36_153412620	W1198	iPLEX	G6PD_X_b36_153412620	ACGTTGGATGCTCAAGCTGGTCTCACAATG	ACGTTGGATGGACCATGTTTGGTGTCAGAG	97	100	63.4	49	40.9	D	F	6718.4	CTGGTCTCACAATGACAATATG	C	6965.6	CTGGTCTCACAATGACAATATGC	A	6989.6	CTGGTCTCACAATGACAATATGA
rs7053878	W1198	iPLEX	rs7053878_A	ACGTTGGATGACGGTCTGCTCCATAAGAGG	ACGTTGGATGGCAACAGAGGAGATGCTGTC	99	97.1	71.7	46	26.1		R	6925.6	CTTCATCCCCTTATTTAAAAAAA	T	7196.8	CTTCATCCCCTTATTTAAAAAAAA	A	7252.6	CTTCATCCCCTTATTTAAAAAAAT
G6PD_X_b36_153424319	W1199	iPLEX	G6PD_X_b36_153424319	ACGTTGGATGACAGCGATTGGGTACTTCTG	ACGTTGGATGTTACTTGCCGTGGTTCCCTG	113	97.9	63.4	52	66.7	Ds	R	4399.9	TCCCTGCCCTCCTCA	G	4647	TCCCTGCCCTCCTCAC	A	4727	TCCCTGCCCTCCTCAT
hG6PD_968	W1199	iPLEX	hG6PD_968_A	ACGTTGGATGTGGGGAACCCCGATGGAGA	ACGTTGGATGACGACGGCTGCAAAAGTGG	117	80.1	64.1	46	60	Dg	F	4531	CCACCAAAGGGTACC	C	4778.2	CCACCAAAGGGTACCC	T	4858.1	CCACCAAAGGGTACCT
G6PD_X_b36_153414937	W1199	iPLEX	G6PD_X_b36_153414937_A	ACGTTGGATGATGCACACCCCAGCTCAGT	ACGTTGGATGATGACGTCCGTGATGAGAAG	120	92	77	48	60	D	F	4553	GTGCCTCGTCACAGA	C	4800.2	GTGCCTCGTCACAGAC	T	4880.1	GTGCCTCGTCACAGAT
G6PD_X_b36_153417405	W1199	iPLEX	G6PD_X_b36_153417405_A	ACGTTGGATGTCACTCTGTTTGCGGATGTC	ACGTTGGATGATGGCCTTCTGCCCGAAAAC	102	98.5	77	56	73.3	D	F	4683	GGCGGGAACGGGCAT	A	4954.3	GGCGGGAACGGGCATA	G	4970.3	GGCGGGAACGGGCATG
G6PD_X_b36_153415828	W1199	iPLEX	G6PD_X_b36_153415828	ACGTTGGATGATCATCGTGGAGAAGCCCTT	ACGTTGGATGAGATCTGGTCCTCACGGAAC	111	95.6	64.6	46	50	d	R	4761.1	CTGTCCAACCACATCT	G	5008.3	CTGTCCAACCACATCTC	A	5088.2	CTGTCCAACCACATCTT
rs5986875	W1199	iPLEX	rs5986875_A	ACGTTGGATGAGAACTCAGACAAGGGTGAC	ACGTTGGATGCTGTTGGCAAATCTGCAGGG	119	97.1	77	48	56.3		R	4817.1	AGGTCAGTTCCTCCAC	G	5064.3	AGGTCAGTTCCTCCACC	A	5144.2	AGGTCAGTTCCTCCACT
rs12393550	W1199	iPLEX	rs12393550_A	ACGTTGGATGTTCTACGACATCGGGCCCTG	ACGTTGGATGAAAGTGGCCAGGGAGGAGTG	109	88.8	77	62	81.3	D	F	4908.2	AGCGCCCAGGGTGCGC	A	5179.4	AGCGCCCAGGGTGCGCA	G	5195.4	AGCGCCCAGGGTGCGCG
G6PD_X_b36_153416019	W1199	iPLEX	G6PD_X_b36_153416019_A	ACGTTGGATGTGCATCATTCAGACGCCCTC	ACGTTGGATGATCTGGGAACACAAGGCACG	106	97	77	56	70.6	D	F	5116.3	GGCCAGAACCTCCTCGC	C	5363.5	GGCCAGAACCTCCTCGCC	T	5443.4	GGCCAGAACCTCCTCGCT
G6PD_X_b36_153413623	W1199	iPLEX	G6PD_X_b36_153413623_A	ACGTTGGATGTTTTCACCCCACTGCTGCAC	ACGTTGGATGCACCTGCCATAAATATAGGG	90	96.8	77	49	52.9	DS	R	5259.4	ATTGAGCTGGAGAAGCC	G	5506.6	ATTGAGCTGGAGAAGCCC	A	5586.5	ATTGAGCTGGAGAAGCCT
rs5986992	W1199	iPLEX	rs5986992_A	ACGTTGGATGAGTAGAAACAGTCCAGCTCG	ACGTTGGATGTTCCTGCTCCGCGCTTCTG	107	90.4	77	48	50	d	R	5474.6	TAACCTGGGTCCTGAATC	C	5761.8	TAACCTGGGTCCTGAATCG	A	5801.7	TAACCTGGGTCCTGAATCT
G6PD_X_b36_153411172	W1199	iPLEX	G6PD_X_b36_153411172_A	ACGTTGGATGTCCTGCCTCCACCCAAGTAG	ACGTTGGATGAGGTGGAAGACCATCCACTG	103	93	77	50	55.6	d	F	5628.7	GAGCTGAAGGGACAGTTG	C	5875.9	GAGCTGAAGGGACAGTTGC	G	5915.9	GAGCTGAAGGGACAGTTGG
G6PD_X_b36_153414077	W1199	iPLEX	G6PD_X_b36_153414077_A	ACGTTGGATGCATCATCTTGGTGTACACGG	ACGTTGGATGATCTTCCACCAGCAGTGCAA	98	97.5	77	56	63.2	D	F	5835.8	GTGTACACGGCCTCGTTGG	C	6083	GTGTACACGGCCTCGTTGGC	G	6123	GTGTACACGGCCTCGTTGGG
G6PD_X_b36_153423083	W1199	iPLEX	G6PD_X_b36_153423083_A	ACGTTGGATGAAAGCAGTTGGGAGCTTCTC	ACGTTGGATGTTGTGTCCTTGGGCAGATCC	105	98.5	77	53	55		F	5963.9	GAGCTTCTCATCTTCCCCAC	A	6235.1	GAGCTTCTCATCTTCCCCACA	G	6251.1	GAGCTTCTCATCTTCCCCACG
rs61042368	W1199	iPLEX	rs61042368_A	ACGTTGGATGGCCAGAATTCAGTCTGCTTC	ACGTTGGATGTCCTAGAGCTTCACTGCTCG	99	98.6	77	53	50	D	F	6036.9	CCTCAAAGCTTCCTCGAAGT	A	6308.1	CCTCAAAGCTTCCTCGAAGTA	G	6324.2	CCTCAAAGCTTCCTCGAAGTG
G6PD_X_b36_153427408	W1199	iPLEX	G6PD_X_b36_153427408_A	ACGTTGGATGTTGGAAAAGCTGAGGCATGG	ACGTTGGATGTCATCATCATGGGTGCATCG	107	99.8	77	60	60	d	F	6207	TGAGGCATGGAGCAGGCACT	C	6454.2	TGAGGCATGGAGCAGGCACTC	T	6534.1	TGAGGCATGGAGCAGGCACTT
rs762513	W1199	iPLEX	rs762513	ACGTTGGATGGGCTGTATACATTTACGCTG	ACGTTGGATGAATATGGTAGCCACTTGCCC	113	97.9	77	46	33.3		R	6382.2	CAAACAGAATTCACCATTTAG	G	6629.4	CAAACAGAATTCACCATTTAGC	A	6709.3	CAAACAGAATTCACCATTTAGT
rs7879049	W1199	iPLEX	rs7879049_A	ACGTTGGATGTTTACCACAGCCCATGGCAC	ACGTTGGATGGCTCAGGGGAGTGAGAAAAG	95	97	77	57	52.4	Dg	R	6424.2	AGCACATCCTGGCATAGAGCA	G	6671.4	AGCACATCCTGGCATAGAGCAC	A	6751.3	AGCACATCCTGGCATAGAGCAT
rs743545	W1199	iPLEX	rs743545	ACGTTGGATGTAAGTTGGAGGCTGCAGCAT	ACGTTGGATGTGACAACAGCCACCAGTCC	119	92.2	77	64	65.2	Dg	R	7123.6	CAGCATGGGCACCTGGGGACAGA	G	7370.8	CAGCATGGGCACCTGGGGACAGAC	A	7450.7	CAGCATGGGCACCTGGGGACAGAT
rs743548	W1199	iPLEX	rs743548	ACGTTGGATGATCATAGGTGGGAGAGGAGC	ACGTTGGATGCAATCCTACCTCCTGATCAC	103	98.5	77	62	65.2	D	F	7123.6	GGAGCTCTGAAGAGCCCGGCAAG	A	7394.8	GGAGCTCTGAAGAGCCCGGCAAGA	G	7410.8	GGAGCTCTGAAGAGCCCGGCAAGG
rs766419	W1199	iPLEX	rs766419	ACGTTGGATGGGCCATGCATAGAGAAAAGC	ACGTTGGATGAATGTCTACAAGCCCCACTC	105	95.5	77	54	41.7	D	F	7427.9	GCATAGAGAAAAGCAGAAACGTCT	C	7675.1	GCATAGAGAAAAGCAGAAACGTCTC	T	7755	GCATAGAGAAAAGCAGAAACGTCTT
rs5986877	W1199	iPLEX	rs5986877_A	ACGTTGGATGACCTTGCTCTTCCCCCTTC	ACGTTGGATGGCAGAAGAGCTCTGCTTTAG	96	95.9	77	64	61.5	s	R	7714	CCCTTCCTCCTCTCAGGCACCCATCT	G	7961.2	CCCTTCCTCCTCTCAGGCACCCATCTC	C	8001.2	CCCTTCCTCCTCTCAGGCACCCATCTG
